# Supplementary material
Source: PubMed Central journal article supplement (PMC3504773)

## Supplemental Spectra S1

Tandem mass spectra of peptides derived from bovine  $\alpha 1(V)$  collagen. Each spectrum is accompanied by a table of sequence-specific product ions identified from the spectrum along with product ion mass errors. Localized modifications are indicated above the table and are identified as bold letters in the peptide sequence. Unlocalized and pseudolocalized sites of modification are also given. Note: each product ion in the table met the requirements of having < 10 ppm mass error and a signal-to-noise ratio > 3.

Bovine

1.

**K24-OH.Gal.Glc, P27-OH**

#1-36: GPAGPMGLTGRPGPMGPPGSGGLKGEPGDMGPQGPR

| Ion                 | charge state | Theoretical m/z (mono) | Experimental m/z (mono) | Mass error (Da) | Mass error (PPM) |
|---------------------|--------------|------------------------|-------------------------|-----------------|------------------|
| [M+4OH]+4OH+Gal.Glc | 4            | 928.9276               | 928.9309                | 0.0132          | 3.6              |
| a2/GP-28            | 1            | 127.0866               | 127.0870                | 0.0004          | 3.1              |
| b2/GP               | 1            | 155.0815               | 155.0820                | 0.0005          | 3.2              |
| PQ/PAG              | 1            | 226.1186               | 226.1195                | 0.0009          | 4.0              |
| b4/GPQ              | 1            | 283.1401               | 283.1412                | 0.0011          | 3.9              |
| y3                  | 1            | 329.1932               | 329.1950                | 0.0018          | 5.5              |
| y10+OH              | 2            | 514.2349               | 514.2360                | 0.0022          | 2.1              |
| b7                  | 1            | 568.2548               | 568.2566                | 0.0018          | 3.2              |
| y6                  | 1            | 611.3260               | 611.3270                | 0.0010          | 1.6              |
| y7                  | 1            | 742.3665               | 742.3692                | 0.0027          | 3.6              |
| b26+3OH             | 3            | 788.0475               | 788.0466                | -0.0027         | -1.1             |
| [M+4H]+4OH          | 4            | 847.9012               | 847.9055                | 0.0172          | 5.1              |
| y28+4OH             | 3            | 903.4220               | 903.4261                | 0.0123          | 4.5              |
| y30+4OH             | 3            | 960.1239               | 960.1223                | -0.0048         | -1.7             |
| b23+2OH             | 2            | 1016.4906              | 1016.4944               | 0.0076          | 3.7              |
| y10+OH              | 1            | 1027.4626              | 1027.4661               | 0.0035          | 3.4              |
| y32+OH              | 3            | 1036.1550              | 1036.1595               | 0.0135          | 4.3              |
| y33+4OH             | 3            | 1055.1621              | 1055.1654               | 0.0099          | 3.1              |
| [M+3H]+4OH          | 3            | 1130.1992              | 1130.2025               | 0.0099          | 2.9              |
| y12+OH              | 1            | 1213.5266              | 1213.5308               | 0.0042          | 3.5              |

\*Unlocalized sites: P18-OH?, P12-OH?,P14-OH?,M15-oxidation?,P17-OH?

Pseudolocalized sites: P12-OH, P18-OH

2\_2\_2012Col5a1\_Bovine\_HCD1\_CE30 #3404 RT: 28.21 AV: 1 NL: 1.12E5

T: FTMS + p NSI d Full ms2 929.43@hcd30.00 [100.00-2000.00]

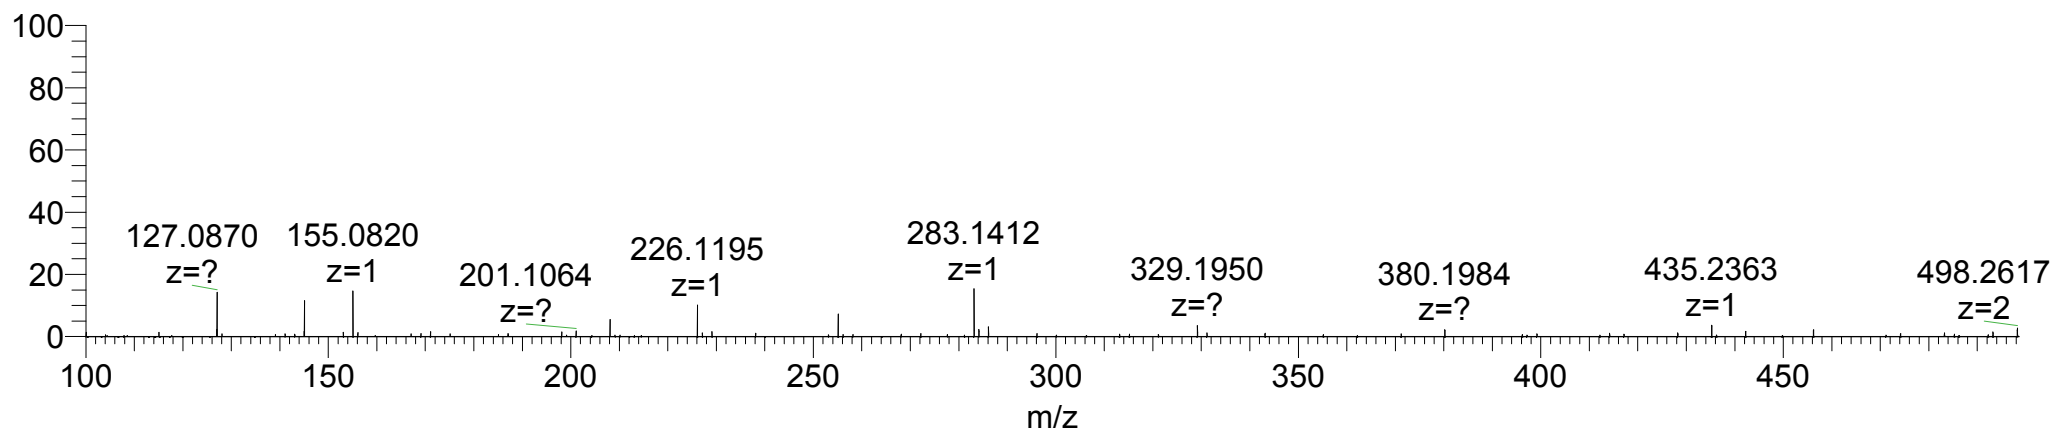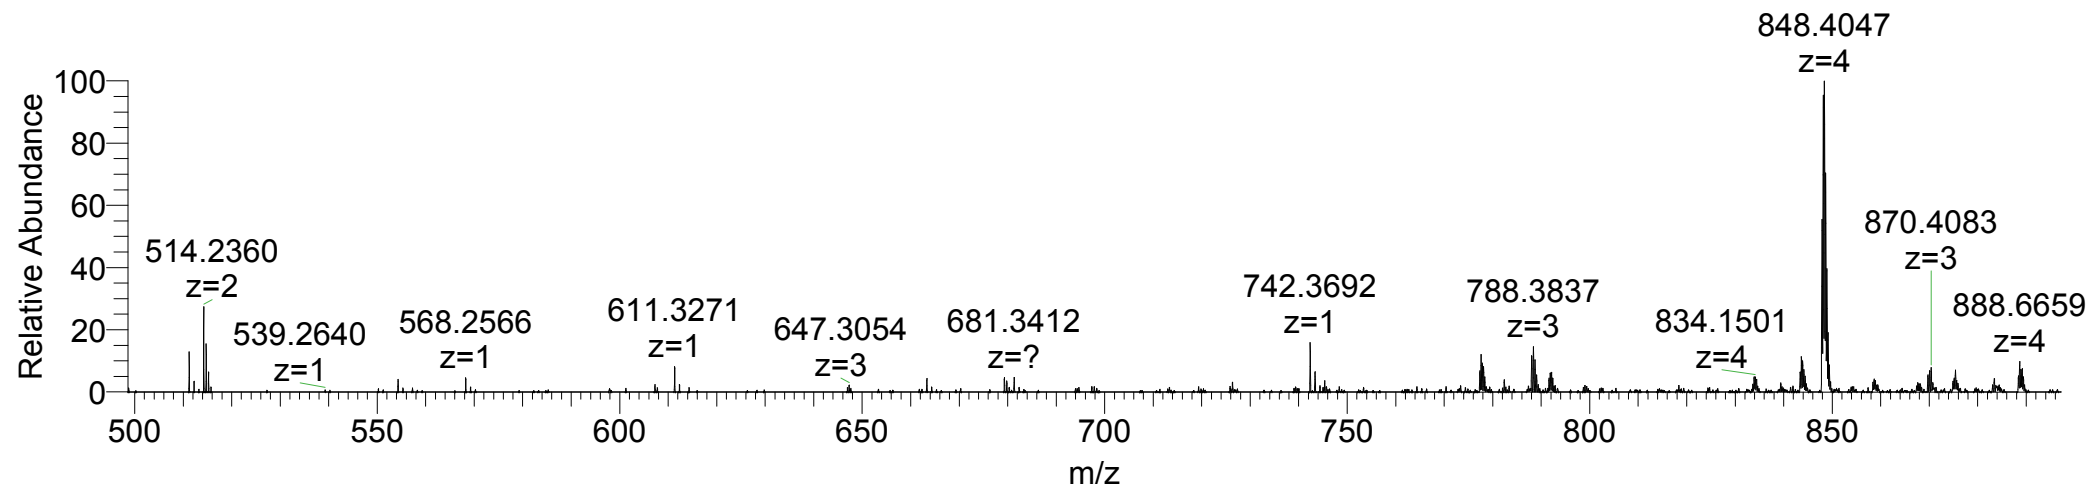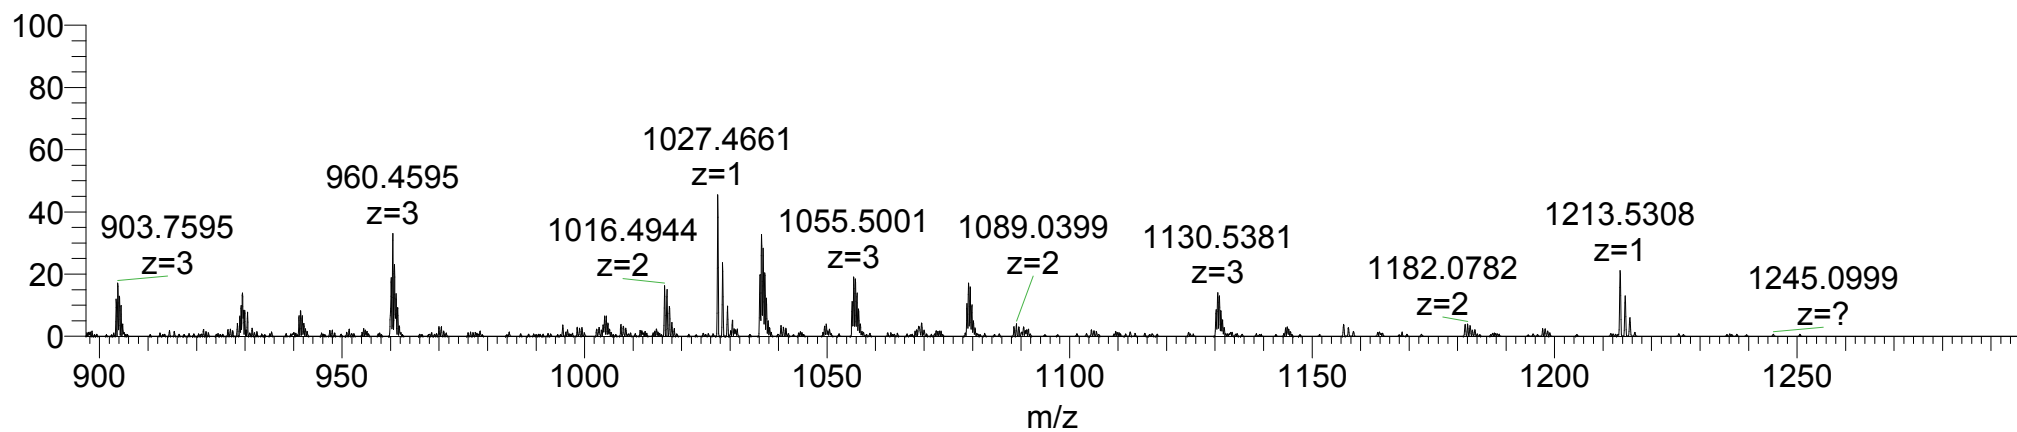

Bovine

2.

P12-OH, P17-OH, P18-OH

#9-23: TGRPGPMGPPGSGGL

| Ion        | charge state | Theoretical m/z (mono) | Experimental m/z (mono) | Mass error (Da) | Mass error (PPM) |
|------------|--------------|------------------------|-------------------------|-----------------|------------------|
| [M+2H]+3OH | 2            | 693.3275               | 693.3293                | 0.0036          | 2.6              |
| y1         | 1            | 132.1019               | 132.1021                | 0.0002          | 1.5              |
| GP-28+OH   | 1            | 143.0815               | 143.0816                | 0.0001          | 0.7              |
| y2         | 1            | 189.1234               | 189.1237                | 0.0003          | 1.6              |
| y3         | 1            | 246.1448               | 246.1454                | 0.0006          | 2.4              |
| GPP+2OH    | 1            | 284.1241               | 284.1247                | 0.0006          | 2.1              |
| b3         | 1            | 315.1775               | 315.1781                | 0.0006          | 1.9              |
| b9+2OH     | 2            | 442.2082               | 442.2093                | 0.0022          | 2.5              |
| b5+OH      | 1            | 485.2467               | 485.2518                | 0.0051          | 10.5             |
| y6+OH      | 1            | 503.2460               | 503.2509                | 0.0049          | 9.7              |
| y7+2OH     | 1            | 616.2937               | 616.2949                | 0.0012          | 1.9              |
| y8+2OH     | 1            | 673.3151               | 673.3132                | -0.0019         | -2.8             |
| a7+OH      | 1            | 685.3450               | 685.3463                | 0.0013          | 1.9              |
| b7+OH      | 1            | 713.3399               | 713.3416                | 0.0017          | 2.4              |
| a8+OH      | 1            | 742.3665               | 742.3679                | 0.0014          | 1.9              |
| b8+OH      | 1            | 770.3614               | 770.3630                | 0.0016          | 2.1              |
| b9+2OH     | 1            | 883.4091               | 883.4125                | 0.0034          | 3.8              |
| a11+3OH    | 1            | 1025.4833              | 1025.4847               | 0.0014          | 1.4              |
| b11+3OH    | 1            | 1053.4782              | 1053.4802               | 0.0020          | 1.9              |
| y12+3OH    | 1            | 1071.4775              | 1071.4752               | -0.0023         | -2.1             |
| a12+3OH    | 1            | 1112.5153              | 1112.5176               | 0.0023          | 2.1              |
| b12+3OH    | 1            | 1140.5102              | 1140.5161               | 0.0059          | 5.2              |
| a13+3OH    | 1            | 1169.5368              | 1169.5388               | 0.0020          | 1.7              |
| b13+3OH    | 1            | 1197.5317              | 1197.5282               | -0.0035         | -2.9             |
| a14+3OH    | 1            | 1226.5582              | 1226.5630               | 0.0048          | 3.9              |
| y13+3OH    | 1            | 1227.5786              | 1227.5687               | -0.0099         | -8.1             |
| b14+3OH    | 1            | 1254.5532              | 1254.5558               | 0.0026          | 2.1              |

4\_5\_2012Col5a1\_Chmy\_HCD1 #2591 RT: 17.21 AV: 1 NL: 4.88E6

T: FTMS + p NSI d Full ms2 693.33@hcd35.00 [115.00-1400.00]

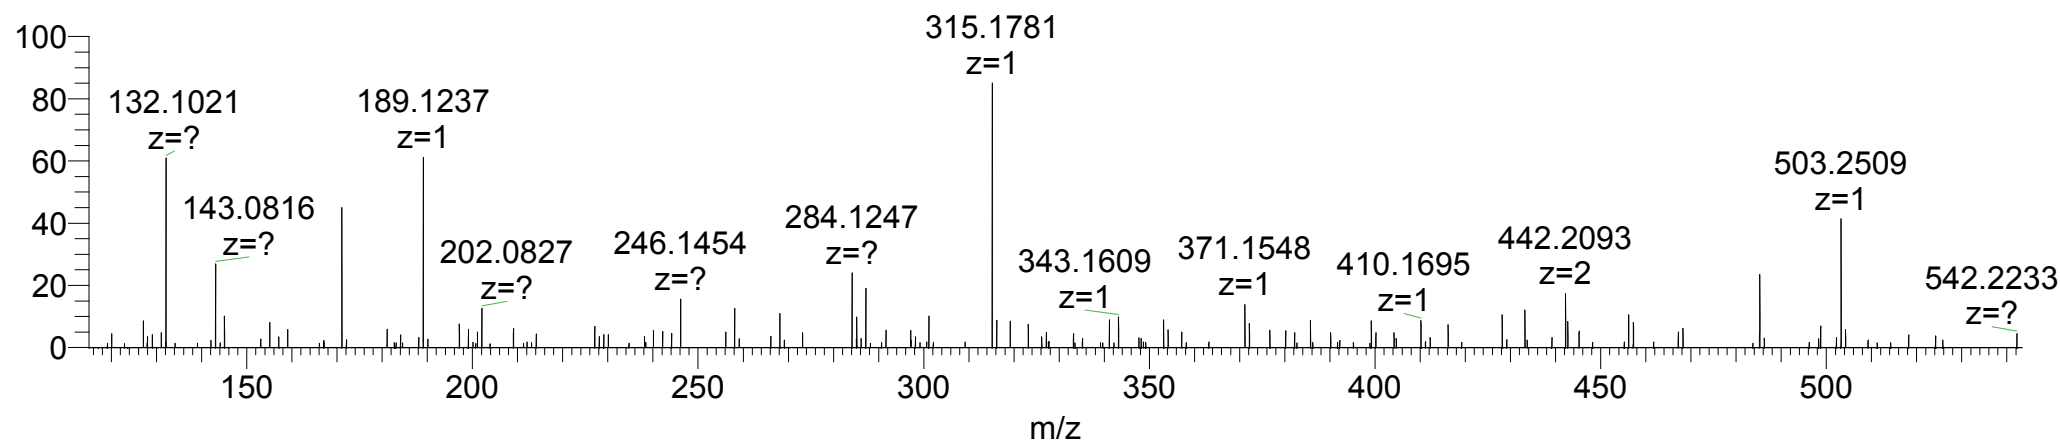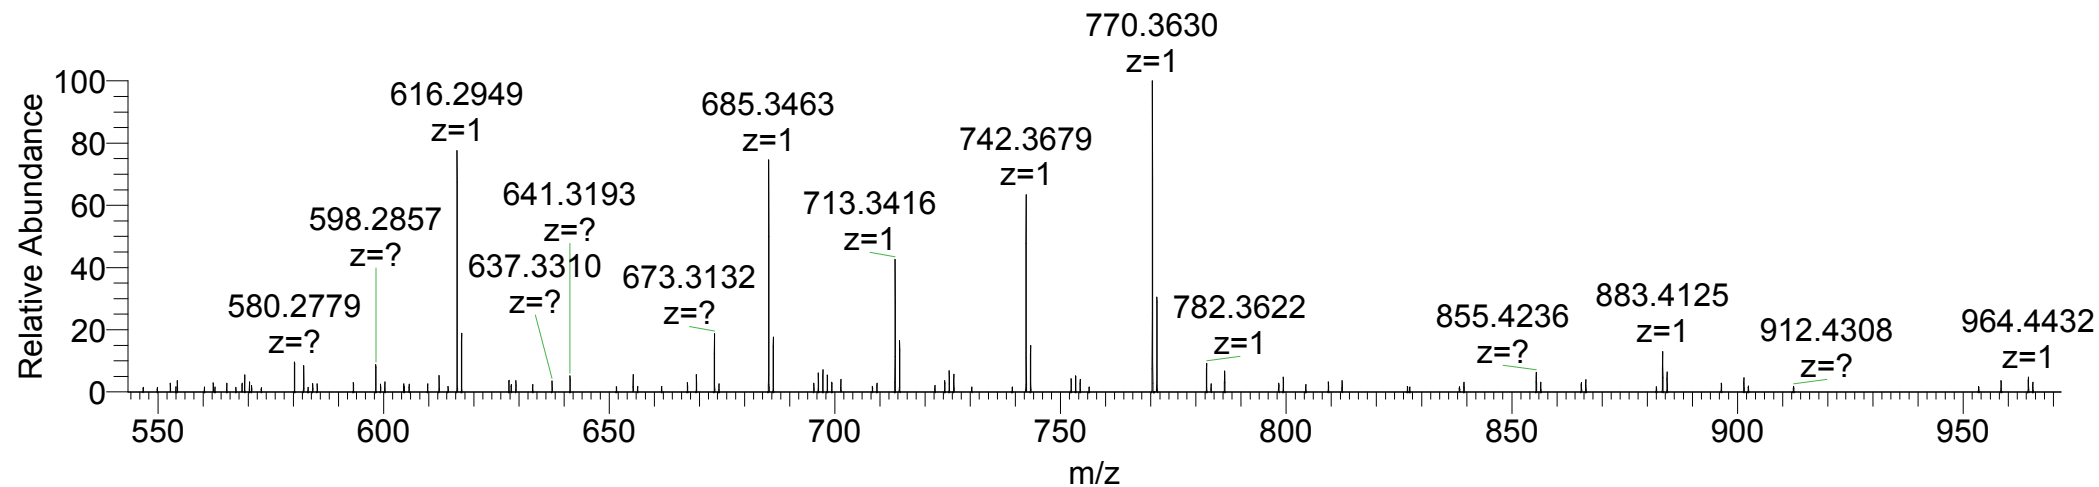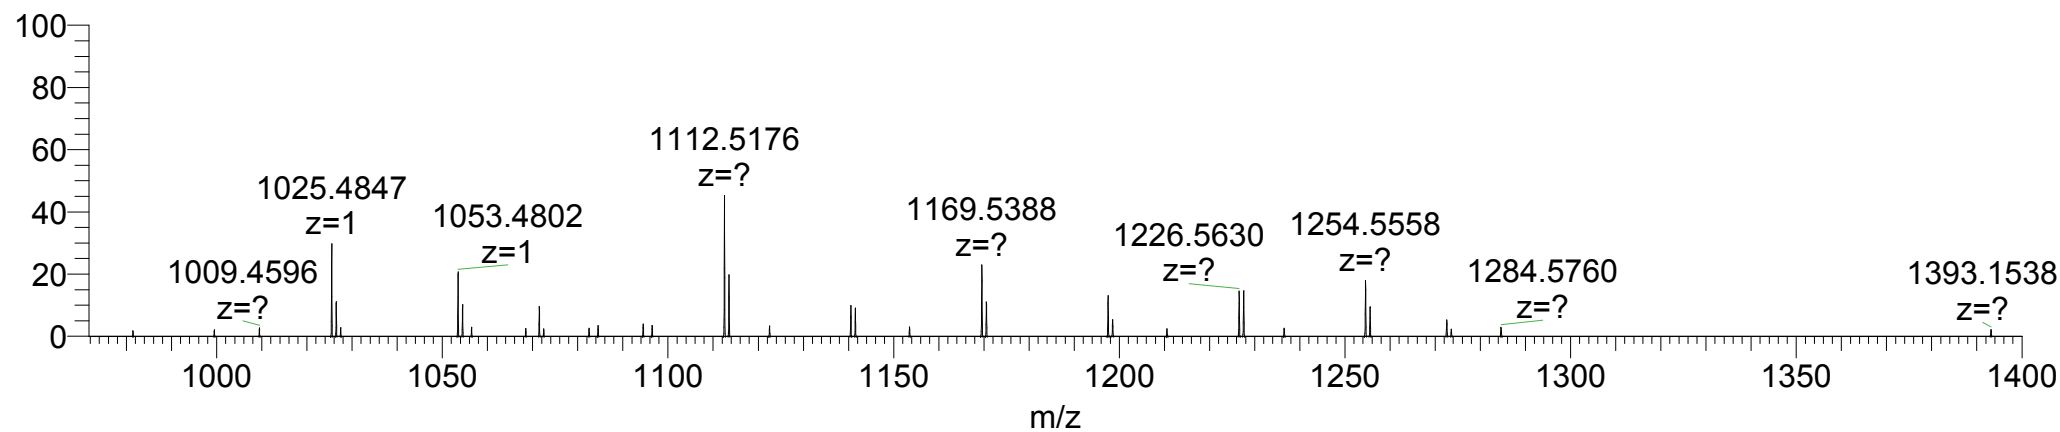

Bovine

3.

**P41-OH, P42-OH, P48-OH**

#37-50: GVQGPPPGPAGKPGR

| Ion         | charge state | Theoretical m/z (mono) | Experimental m/z (mono) | Mass error (Da) | Mass error (PPM) |
|-------------|--------------|------------------------|-------------------------|-----------------|------------------|
| [M+3H]+3OH  | 3            | 441.5652               | 441.5658                | 0.0018          | 1.4              |
| K           | 1            | 129.1022               | 129.1021                | -0.0001         | -0.8             |
| PG-28+OH    | 1            | 143.0815               | 143.0813                | -0.0002         | -1.4             |
| b2          | 1            | 157.0972               | 157.0970                | -0.0002         | -1.3             |
| PG+OH       | 1            | 171.0764               | 171.0762                | -0.0002         | -1.2             |
| y10+3OH     | 3            | 327.8419               | 327.8416                | -0.0009         | -0.9             |
| y3+OH       | 1            | 345.1881               | 345.1879                | -0.0002         | -0.6             |
| y7+OH       | 2            | 349.7008               | 349.7005                | -0.0006         | -0.9             |
| y8+OH       | 2            | 378.2116               | 378.2114                | -0.0004         | -0.5             |
| b13+3OH     | 3            | 383.5280               | 383.5320                | 0.0120          | 10.4             |
| y9+2OH      | 2            | 434.7354               | 434.7347                | -0.0014         | -1.6             |
| y10+3OH     | 2            | 491.2592               | 491.2588                | -0.0008         | -0.8             |
| y11+3OH     | 2            | 519.7700               | 519.7692                | -0.0016         | -1.5             |
| y5+OH       | 1            | 530.3045               | 530.3040                | -0.0005         | -0.9             |
| y12-NH3+3OH | 3            | 575.2860               | 575.2872                | 0.0036          | 2.1              |
| y6+OH       | 1            | 601.3416               | 601.3408                | -0.0008         | -1.3             |
| y7+OH       | 1            | 698.3944               | 698.3942                | -0.0002         | -0.3             |
| y8+OH       | 1            | 755.4159               | 755.4153                | -0.0006         | -0.8             |
| y9+OH       | 1            | 868.4635               | 868.4620                | -0.0015         | -1.7             |

2\_25\_2012Col5a1\_Bovine\_ArgC\_CE35\_3 #313 RT: 4.43 AV: 1 NL: 9.58E6

T: FTMS + p NSI d Full ms2 441.56@hcd35.00 [100.00-1335.00]

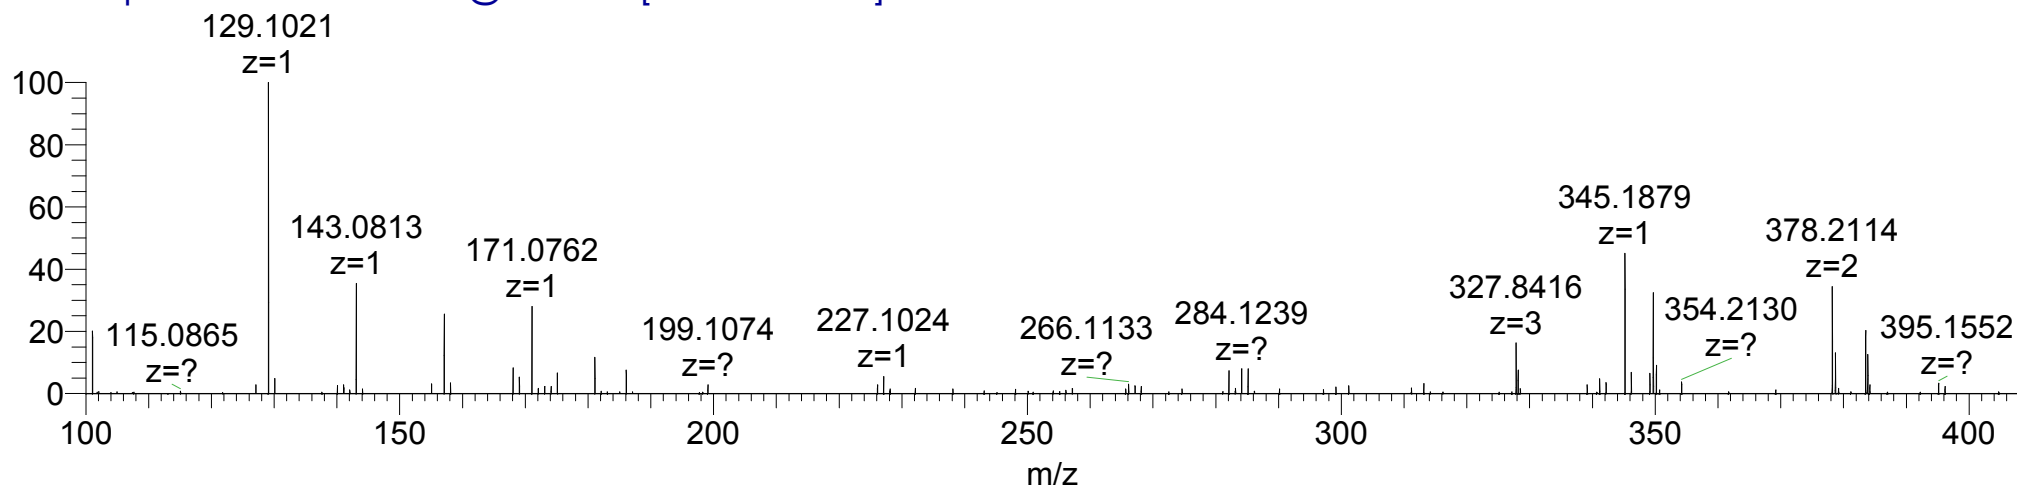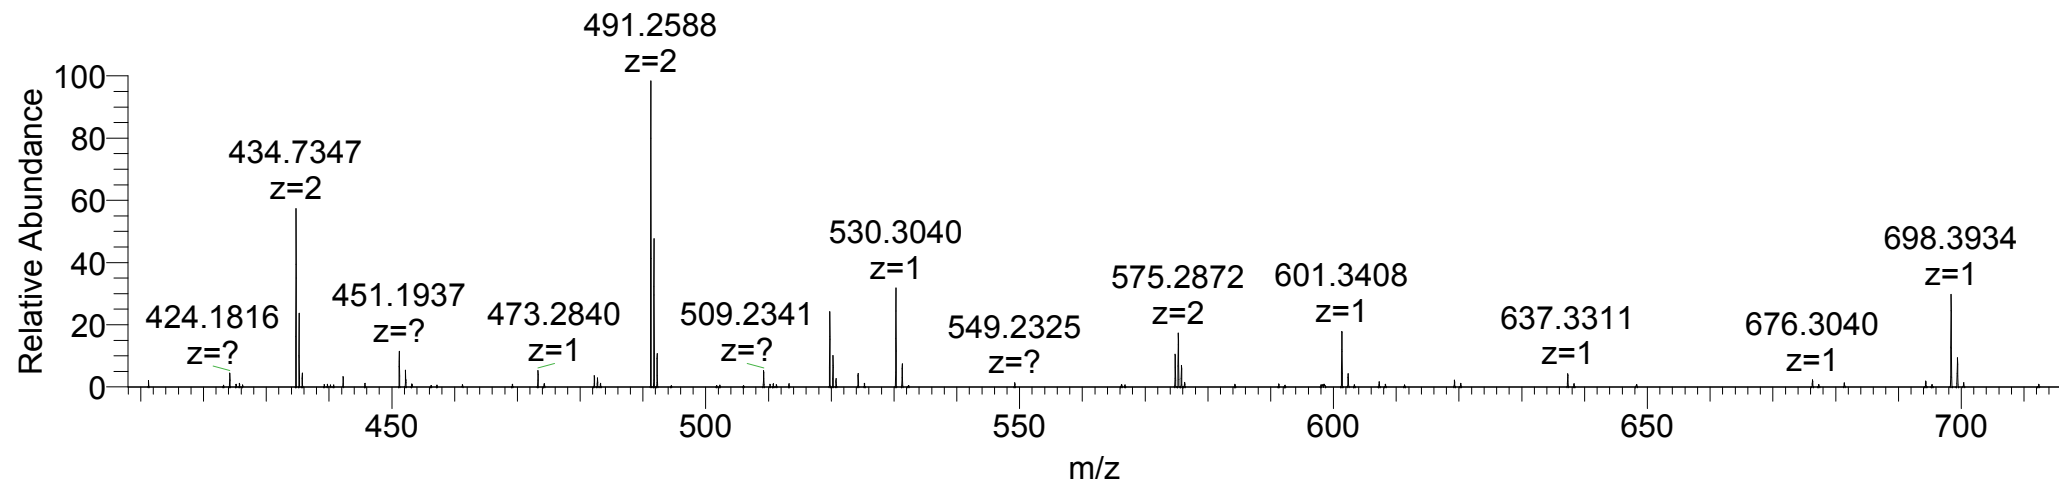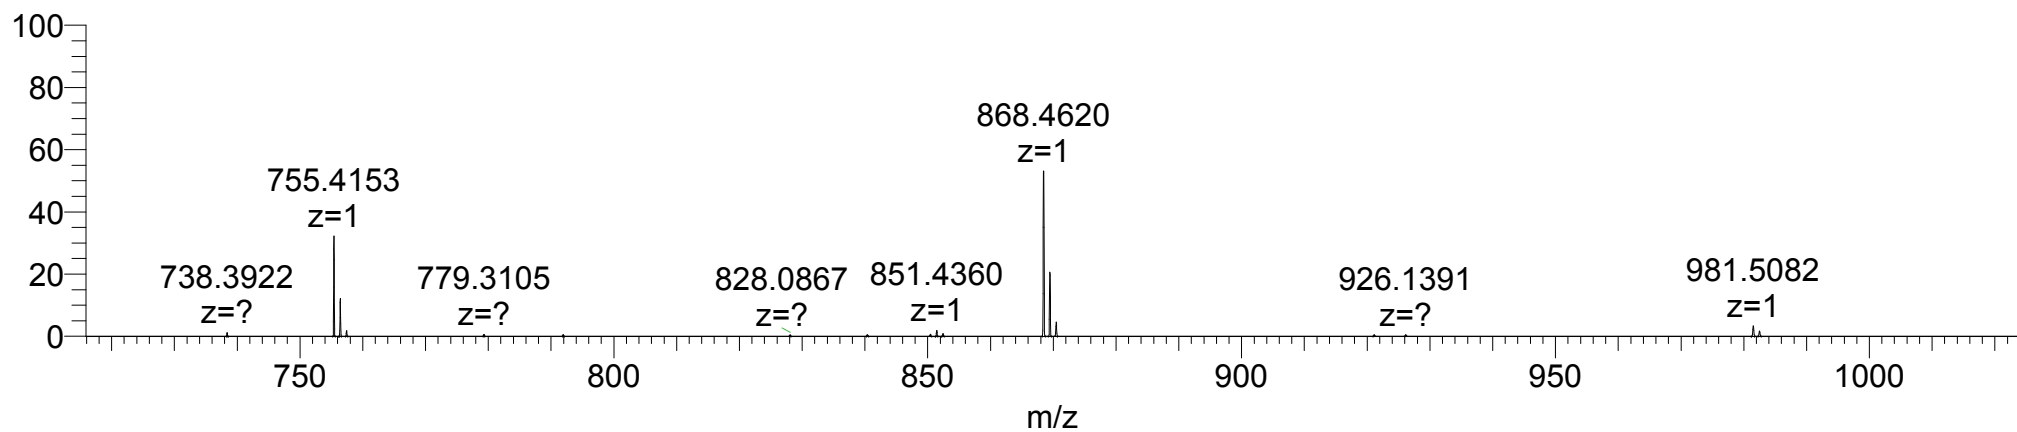

Bovine

4.

**P63-OH, K69-OH.Gal.Glc**

#61-72: GMPPGQTGPKKGDR

| Ion                | charge state | Theoretical m/z (mono) | Experimental m/z (mono) | Mass error (Da) | Mass error (PPM) |
|--------------------|--------------|------------------------|-------------------------|-----------------|------------------|
| [M+3H]+2OH+Gal.Glc | 3            | 519.5630               | 519.5634                | 0.0012          | 0.8              |
| a2                 | 1            | 161.0743               | 161.0741                | -0.0002         | -1.2             |
| y1                 | 1            | 175.1190               | 175.1187                | -0.0003         | -1.7             |
| b2                 | 1            | 189.0692               | 189.0691                | -0.0001         | -0.5             |
| PK+OH              | 1            | 242.1499               | 242.1500                | 0.0001          | 0.4              |
| PGQ-28+OH          | 1            | 271.1401               | 271.1397                | -0.0004         | -1.5             |
| PGQ+OH/KGQ+OH      | 1            | 299.1350               | 299.1349                | -0.0001         | -0.3             |
| y3                 | 1            | 347.1674               | 347.1669                | -0.0005         | -1.4             |
| y7+OH              | 2            | 373.6932               | 373.6935                | 0.0006          | 0.8              |
| y8-H2O+OH          | 2            | 428.7172               | 428.7176                | 0.0008          | 0.9              |
| y8-NH3+OH          | 2            | 429.2092               | 429.2099                | 0.0014          | 1.6              |
| y9+OH              | 2            | 466.2332               | 466.2329                | -0.0006         | -0.6             |
| y4+OH              | 1            | 491.2572               | 491.2584                | 0.0012          | 2.4              |
| y10-H2O+2OH        | 2            | 513.7518               | 513.7515                | -0.0006         | -0.6             |
| y10-NH3+2OH        | 2            | 514.2438               | 514.2455                | 0.0034          | 3.3              |
| y10+2OH            | 2            | 522.7571               | 522.7563                | -0.0016         | -1.5             |
| y7+OH              | 1            | 746.3791               | 746.3785                | -0.0006         | -0.8             |
| y8+OH              | 1            | 874.4377               | 874.4346                | -0.0031         | -3.5             |
| y9+OH              | 1            | 931.4592               | 931.4551                | -0.0041         | -4.4             |
| y10+2OH            | 1            | 1044.5069              | 1044.5061               | -0.0008         | -0.8             |
| y10+2OH+Gal        | 1            | 1206.5597              | 1206.5509               | -0.0088         | -7.3             |



4\_5\_2012Col5a1\_ArgC\_HCD5 #357 RT: 3.54 AV: 1 NL: 1.99E5

T: FTMS + p NSI d Full ms2 519.56@hcd35.00 [115.00-1570.00]

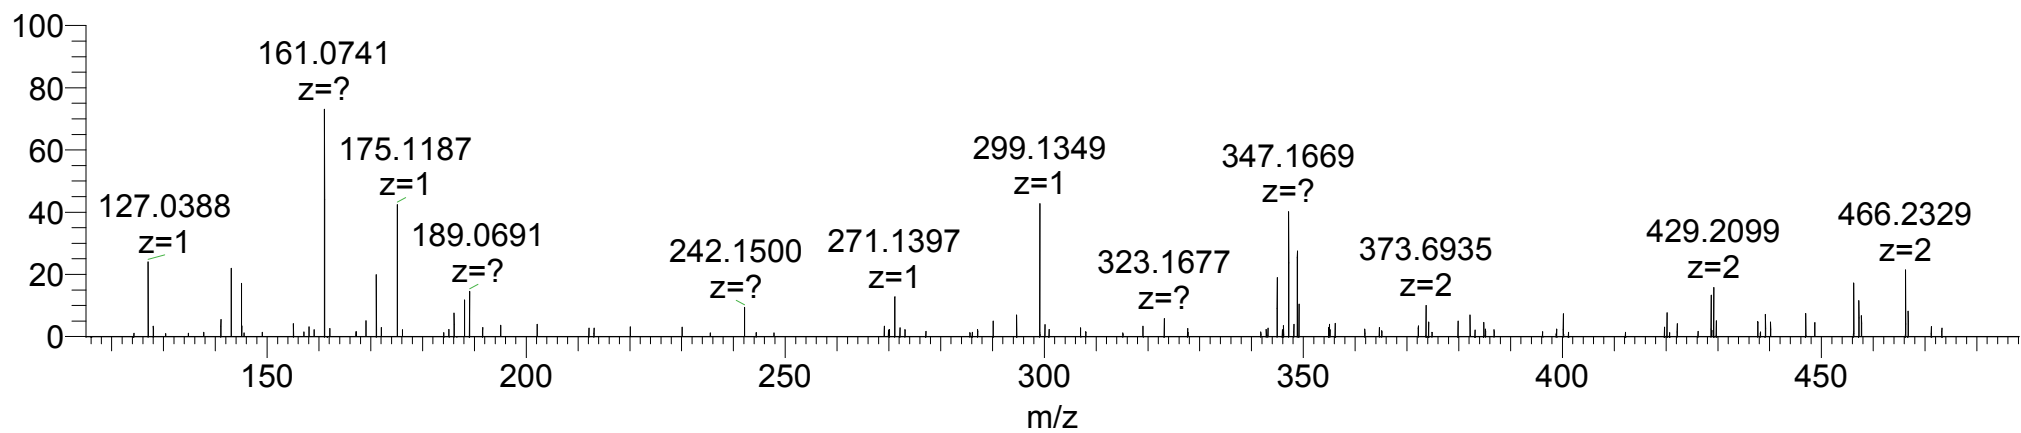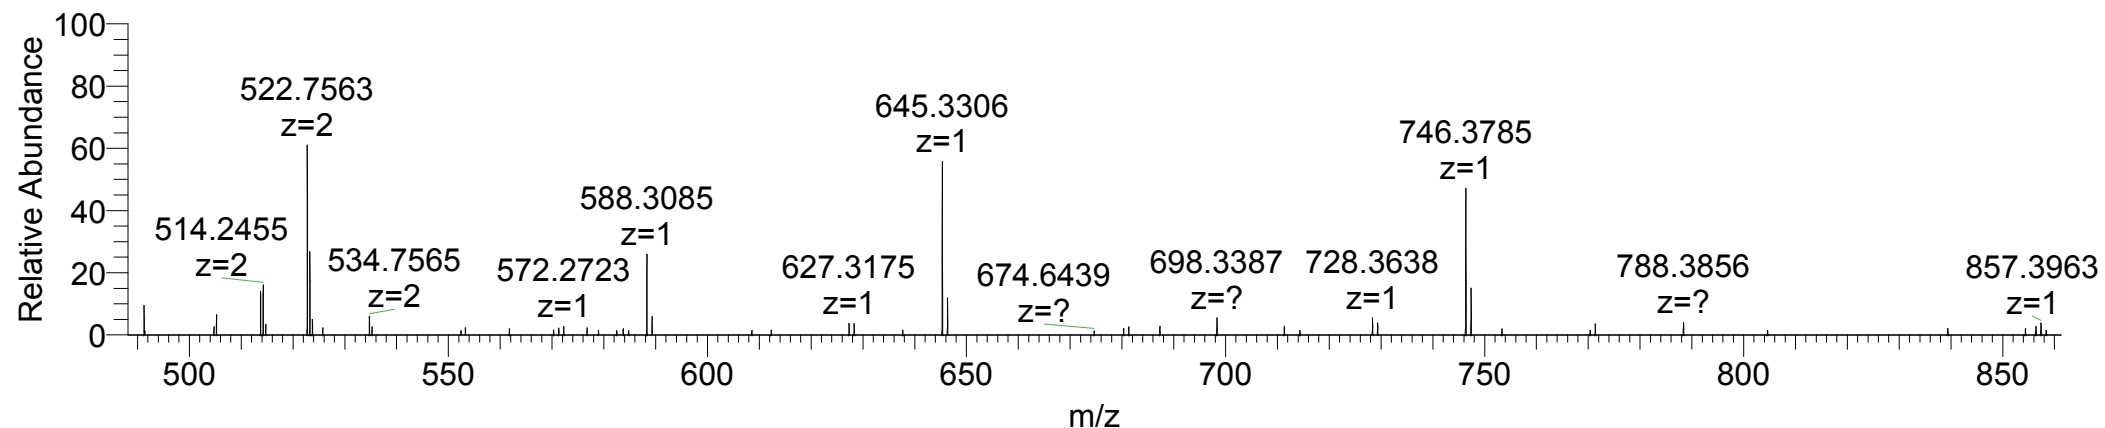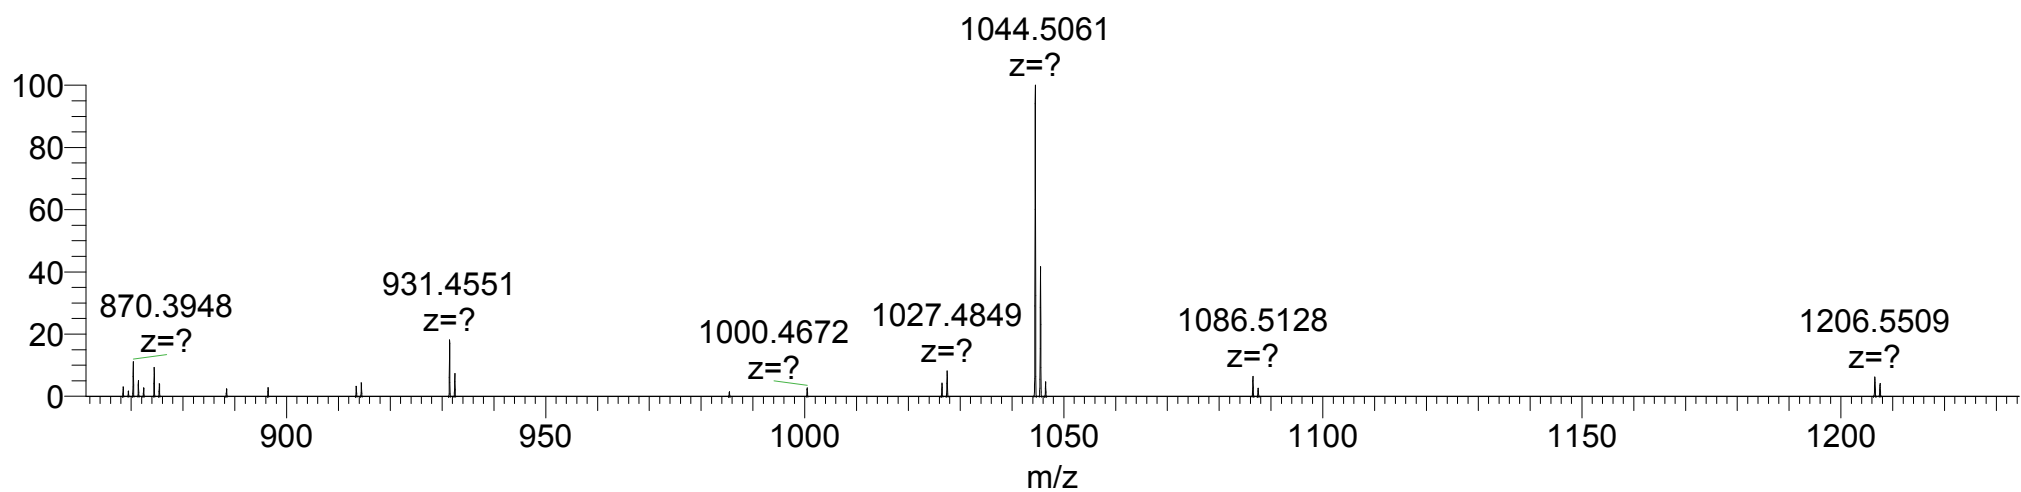

Bovine

5.

P81-OH, K84-OH.Gal.Glc

#73-87: GFDGLAGLPGEKGHR

| Ion                | charge state | Theoretical m/z (mono) | Experimental m/z (mono) | Mass error (Da) | Mass error (PPM) |
|--------------------|--------------|------------------------|-------------------------|-----------------|------------------|
| [M+3H]+2OH+Gal.Glc | 3            | 622.9620               | 622.9606                | -0.0042         | -2.2             |
| F                  | 1            | 120.0808               | 120.0804                | -0.0004         | -3.3             |
| a2                 | 1            | 177.1022               | 177.1017                | -0.0005         | -2.8             |
| b2                 | 1            | 205.0972               | 205.0966                | -0.0006         | -2.9             |
| GLA/LGA/AGL        | 1            | 242.1499               | 242.1495                | -0.0004         | -1.7             |
| DGL                | 1            | 286.1397               | 286.1390                | -0.0007         | -2.4             |
| b3/FDG             | 1            | 320.1241               | 320.1233                | -0.0008         | -2.5             |
| y3                 | 1            | 369.1993               | 369.1991                | -0.0002         | -0.5             |
| y7+2OH             | 2            | 406.7041               | 406.7032                | -0.0018         | -2.2             |
| DLAG               | 1            | 414.1983               | 414.1971                | -0.0012         | -2.9             |
| y9+2OH             | 2            | 491.7569               | 491.7555                | -0.0028         | -2.8             |
| y10+2OH            | 2            | 527.2754               | 527.2744                | -0.0020         | -1.9             |
| y12+2OH            | 2            | 612.3282               | 612.3284                | 0.0004          | 0.3              |
| y13+2OH            | 2            | 669.8417               | 669.8415                | -0.0004         | -0.3             |
| y6+OH              | 1            | 699.3533               | 699.3500                | -0.0033         | -4.7             |
| y7+2OH             | 1            | 812.4009               | 812.3985                | -0.0024         | -3.0             |
| y8+2OH             | 1            | 925.4850               | 925.4853                | 0.0003          | 0.3              |
| y9+2OH             | 1            | 982.5065               | 982.5068                | 0.0003          | 0.3              |
| y10+2OH            | 1            | 1053.5436              | 1053.5417               | -0.0019         | -1.8             |
| y12+2OH            | 1            | 1223.6491              | 1223.6455               | -0.0036         | -2.9             |
| y13+2OH            | 1            | 1338.6761              | 1338.6726               | -0.0035         | -2.6             |

2\_25\_2012Col5a1\_Bovine\_ArgC\_CE35\_3 #3233 RT: 25.05 AV: 1 NL: 5.47E4

T: FTMS + p NSI d Full ms2 622.96@hcd35.00 [100.00-1880.00]

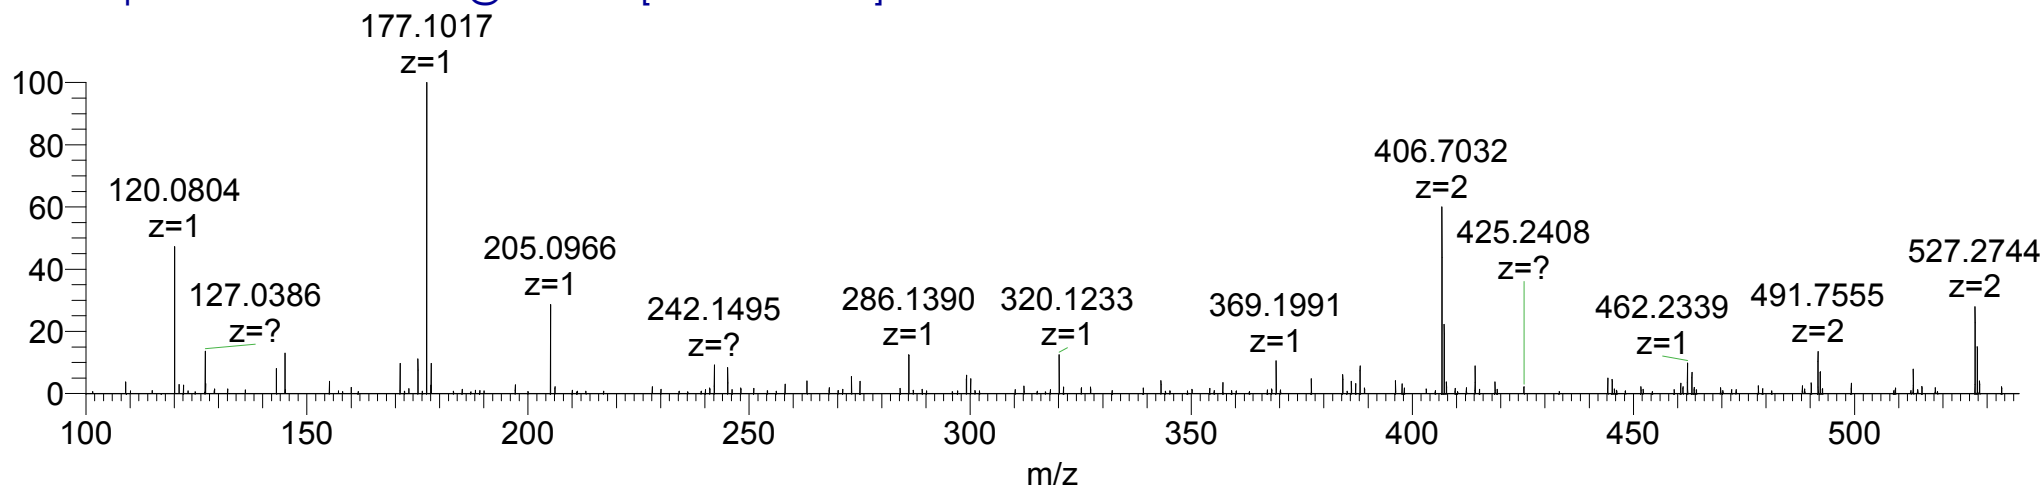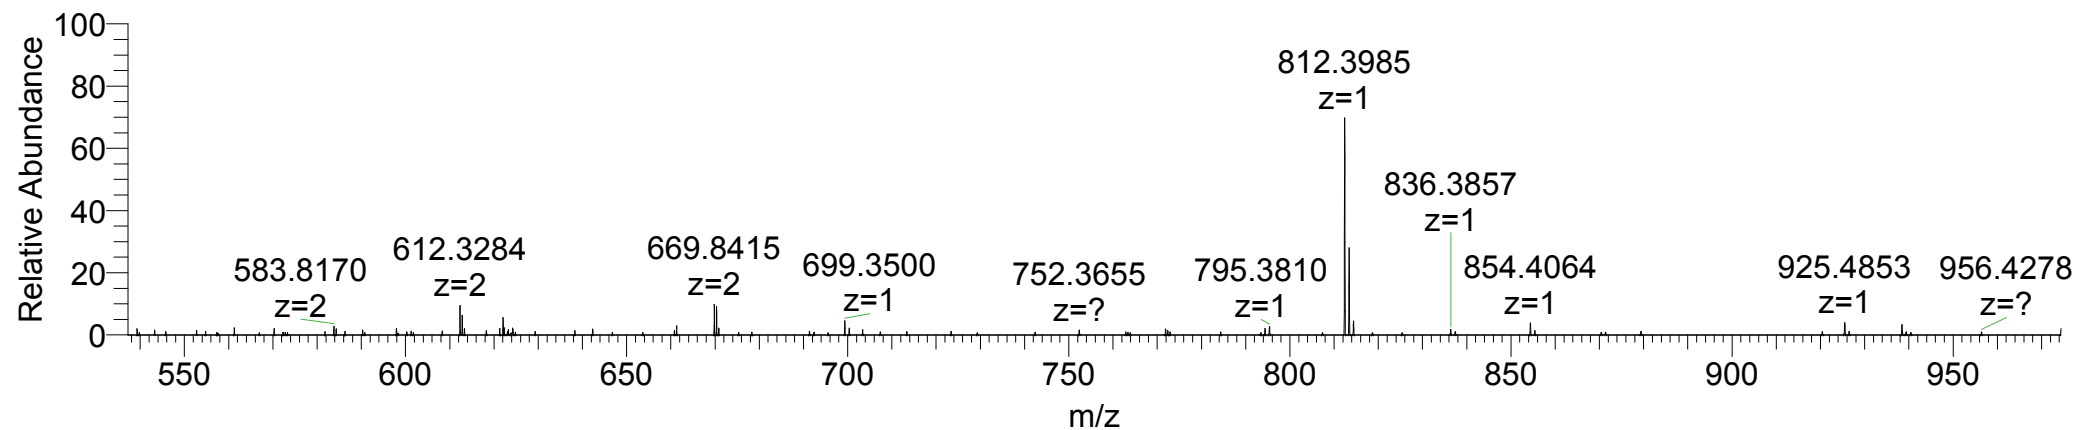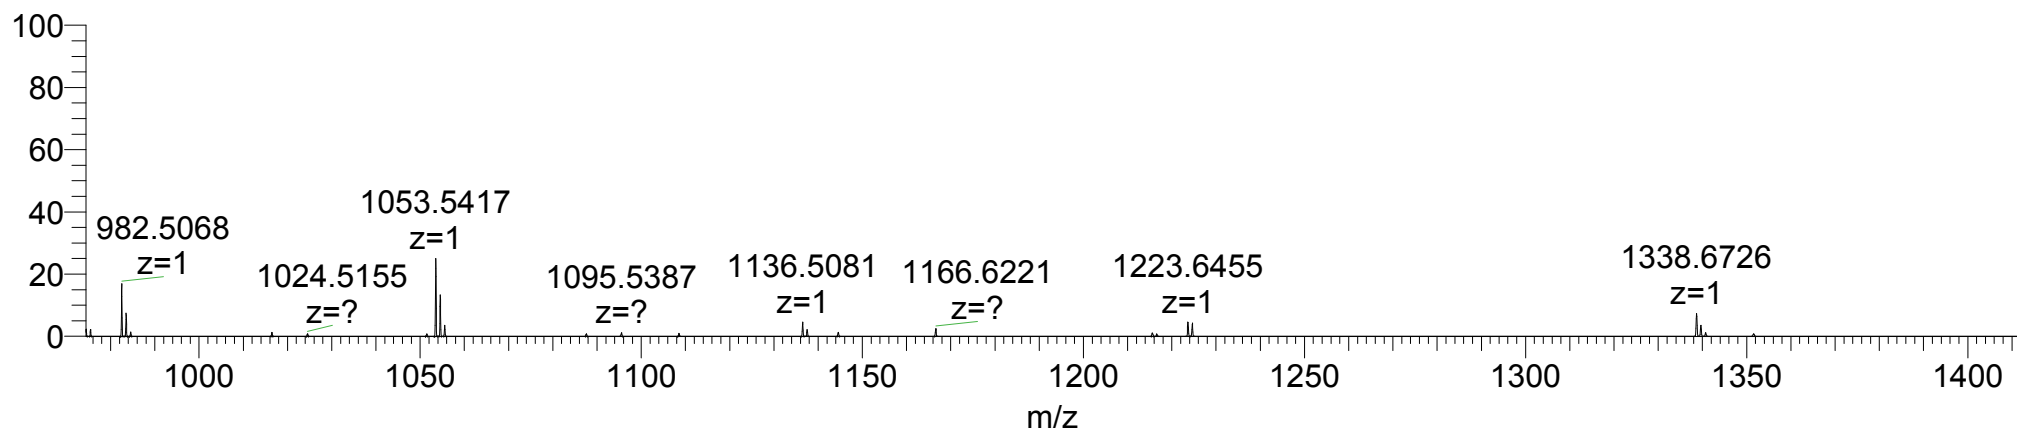

Bovine

6.

**P90-OH, P95-OH, P96-OH, P98-OH, P99-OH**

#88-105: GDPPGSGPPGPPGEDGER

| Ion          | charge state | Theoretical m/z (mono) | Experimental m/z (mono) | Mass error (Da) | Mass error (PPM) |
|--------------|--------------|------------------------|-------------------------|-----------------|------------------|
| [M+2H]+5OH   | 2            | 887.8586               | 887.8584                | -0.0004         | -0.2             |
| y3           | 1            | 361.1830               | 361.1833                | 0.0003          | 0.8              |
| GPSGP-H2O+OH | 1            | 394.1721               | 394.1719                | -0.0002         | -0.5             |
| y4           | 1            | 476.2100               | 476.2104                | 0.0004          | 0.8              |
| b6           | 1            | 527.2096               | 527.2095                | -0.0001         | -0.2             |
| b7-H2O+OH    | 1            | 566.2205               | 566.2205                | 0.0000          | 0.0              |
| b7+OH        | 1            | 584.2311               | 584.2308                | -0.0003         | -0.5             |
| y11+4OH      | 2            | 586.2467               | 586.2469                | 0.0004          | 0.3              |
| y12+4OH      | 2            | 614.7575               | 614.7575                | 0.0000          | 0.0              |
| y14-H2O+4OH  | 2            | 697.7946               | 697.7933                | -0.0026         | -1.9             |
| y14+4OH      | 2            | 706.7999               | 706.8003                | 0.0008          | 0.6              |
| y16-H2O+5OH  | 2            | 782.8291               | 782.8319                | 0.0056          | 3.6              |
| y16+5OH      | 2            | 791.8344               | 791.8343                | -0.0002         | -0.1             |
| PPGPPGEP+4OH | 1            | 811.3105               | 811.3083                | -0.0022         | -2.7             |
| y17+5OH      | 1            | 849.3479               | 849.3441                | -0.0038         | -4.5             |
| [M+2H]+5OH   | 2            | 877.8586               | 877.8582                | -0.0008         | -0.5             |
| y8+2OH       | 1            | 888.3694               | 888.3713                | 0.0019          | 2.1              |
| y9+2OH       | 1            | 945.3908               | 945.3895                | -0.0013         | -1.4             |
| y10+3OH      | 1            | 1058.4385              | 1058.4396               | 0.0011          | 1.0              |
| y11+4OH      | 1            | 1171.4862              | 1171.4888               | 0.0026          | 2.2              |
| y12+4OH      | 1            | 1228.5077              | 1228.5090               | 0.0013          | 1.1              |

2\_2\_2012Col5a1\_Bovine\_HCD1\_CE30 #383 RT: 4.37 AV: 1 NL: 1.54E5

T: FTMS + p NSI d Full ms2 878.36@hcd30.00 [100.00-1770.00]

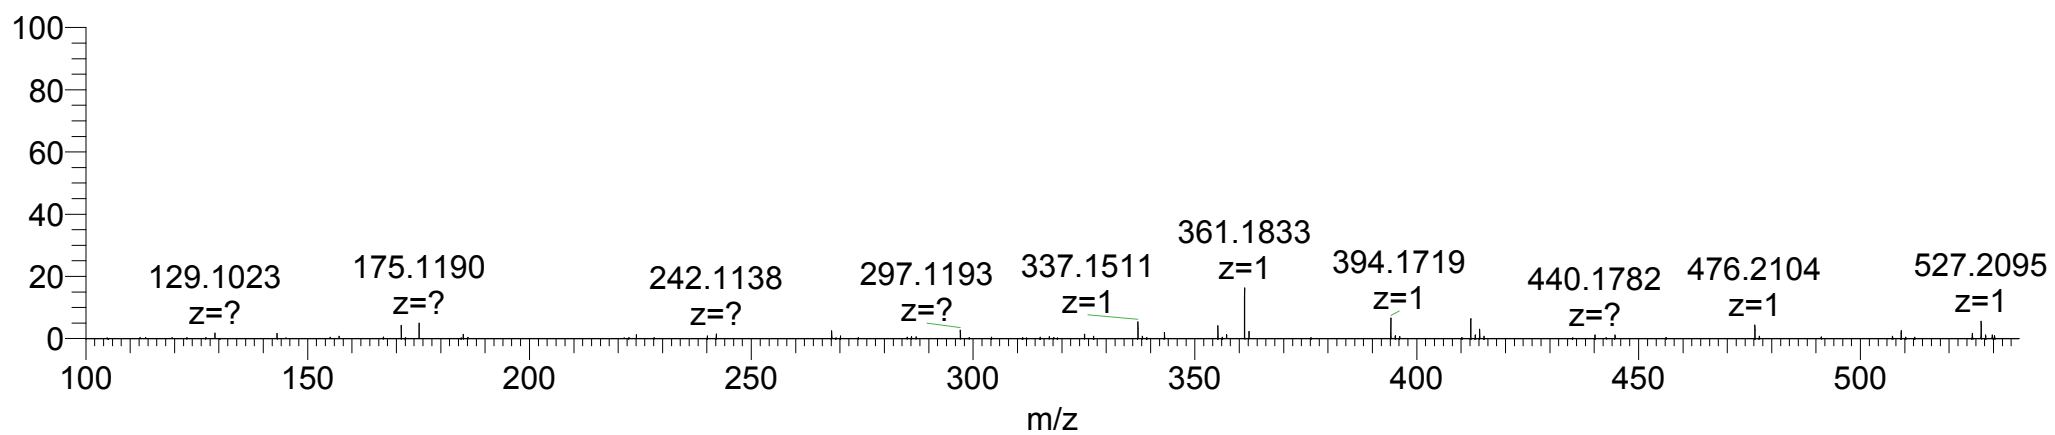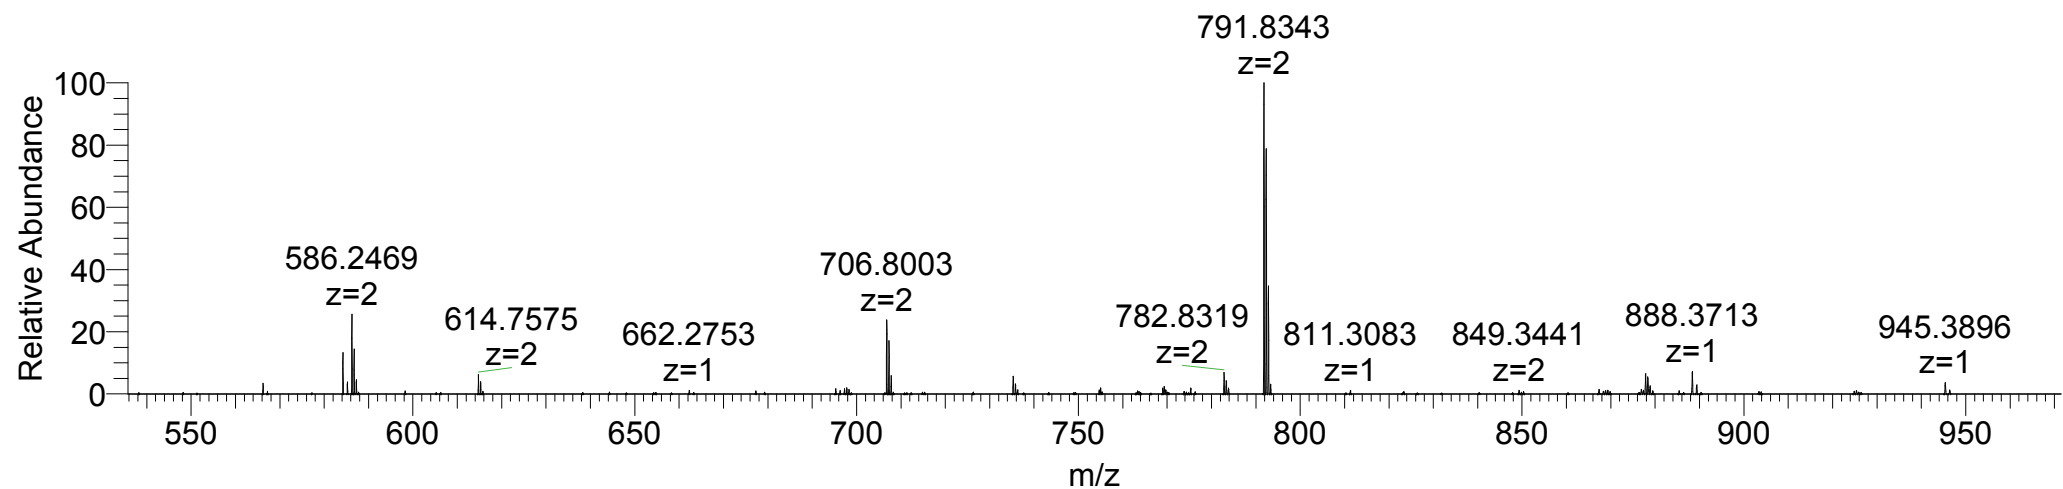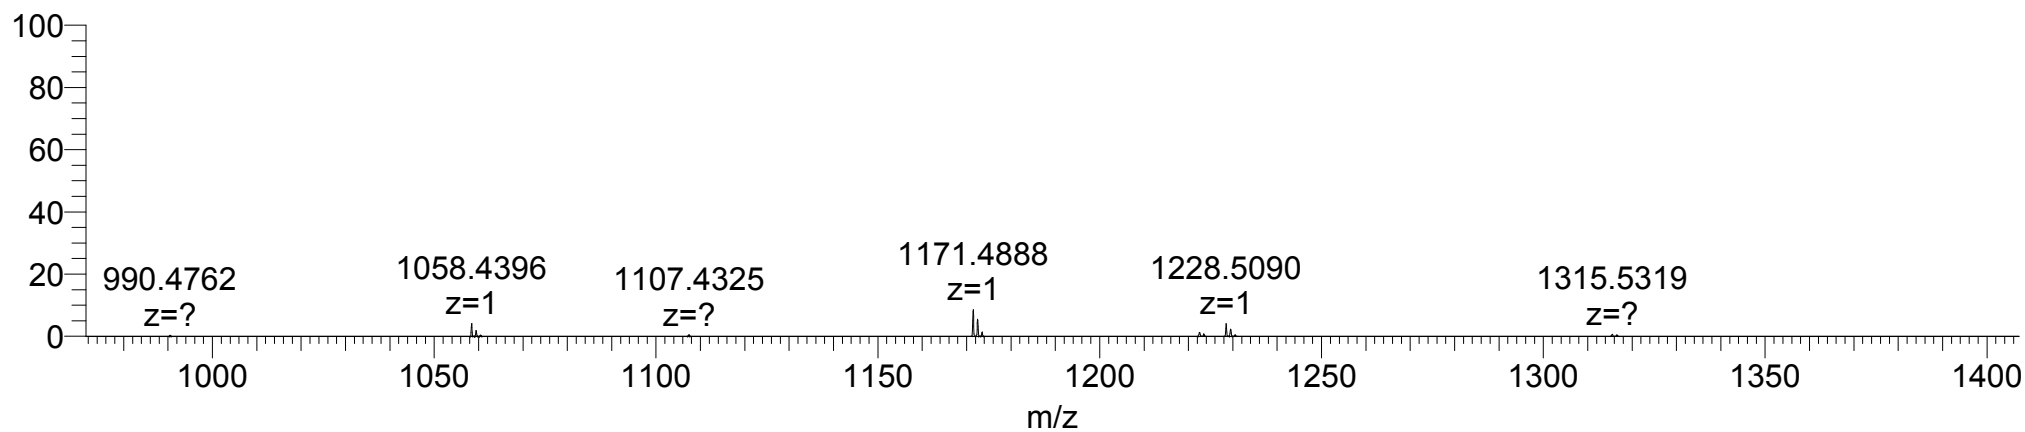

Bovine

7.

**P117-OH, P120-OH**

#115-123: GLPGEPGPR

MS<sup>2</sup>: GLPGEPGPR

| Ion                      | charge state | Theoretical m/z (mono) | Experimental m/z (mono) | Mass error (Da) | Mass error (PPM) |
|--------------------------|--------------|------------------------|-------------------------|-----------------|------------------|
| [M+2H]+2OH               | 2            | 456.2327               | 456.2334                | 0.0014          | 1.5              |
| a2                       | 1            | 143.1179               | 143.1183                | 0.0004          | 2.8              |
| PGE+OH                   | 1            | 300.1190               | 300.1198                | 0.0008          | 2.7              |
| y7+2OH(MS <sup>3</sup> ) | 2            | 371.1799               | 371.1806                | 0.0014          | 1.9              |
| y4+OH                    | 1            | 442.2409               | 442.2417                | 0.0008          | 1.8              |
| y6+OH                    | 1            | 628.3049               | 628.3034                | -0.0015         | -2.4             |
| y7+OH                    | 1            | 741.3526               | 741.3545                | 0.0019          | 2.6              |

MS<sup>3</sup>: PGEPGPR

| Ion         | charge state | Theoretical m/z (mono) | Experimental m/z (mono) | Mass error (Da) | Mass error (PPM) |
|-------------|--------------|------------------------|-------------------------|-----------------|------------------|
| a2/PG-28+OH | 1            | 143.0815               | 143.0821                | 0.0006          | 4.2              |
| b2/GP+OH    | 1            | 171.0764               | 171.0771                | 0.0007          | 4.1              |
| y4+OH       | 2            | 221.6241               | 221.6250                | 0.0018          | 4.1              |
| EPG-28+OH   | 1            | 272.1241               | 272.1252                | 0.0011          | 4.0              |
| b3+OH       | 1            | 300.1190               | 300.1202                | 0.0012          | 4.0              |
| y3          | 1            | 329.1932               | 329.1944                | 0.0012          | 3.6              |
| [M+2H]+2OH  | 2            | 371.1799               | 371.1813                | 0.0028          | 3.8              |
| y4-NH3+OH   | 1            | 425.2143               | 425.2157                | 0.0014          | 3.3              |
| y4+OH       | 1            | 442.2409               | 442.2424                | 0.0015          | 3.4              |
| b5+2OH      | 1            | 470.1882               | 470.1894                | 0.0012          | 2.6              |
| y5-H2O+2OH  | 1            | 553.2729               | 553.2751                | 0.0022          | 4.0              |
| y5+OH       | 1            | 571.2835               | 571.2852                | 0.0017          | 3.0              |
| y6+OH       | 1            | 628.3049               | 628.3064                | 0.0015          | 2.4              |

2\_2\_2012Col5a1\_Bovine\_us2Top3\_120203220224 #691 RT: 10.70 AV: 1 NL: 1.05E6

T: FTMS + p NSI d Full ms2 456.23@cid35.00 [115.00-925.00]

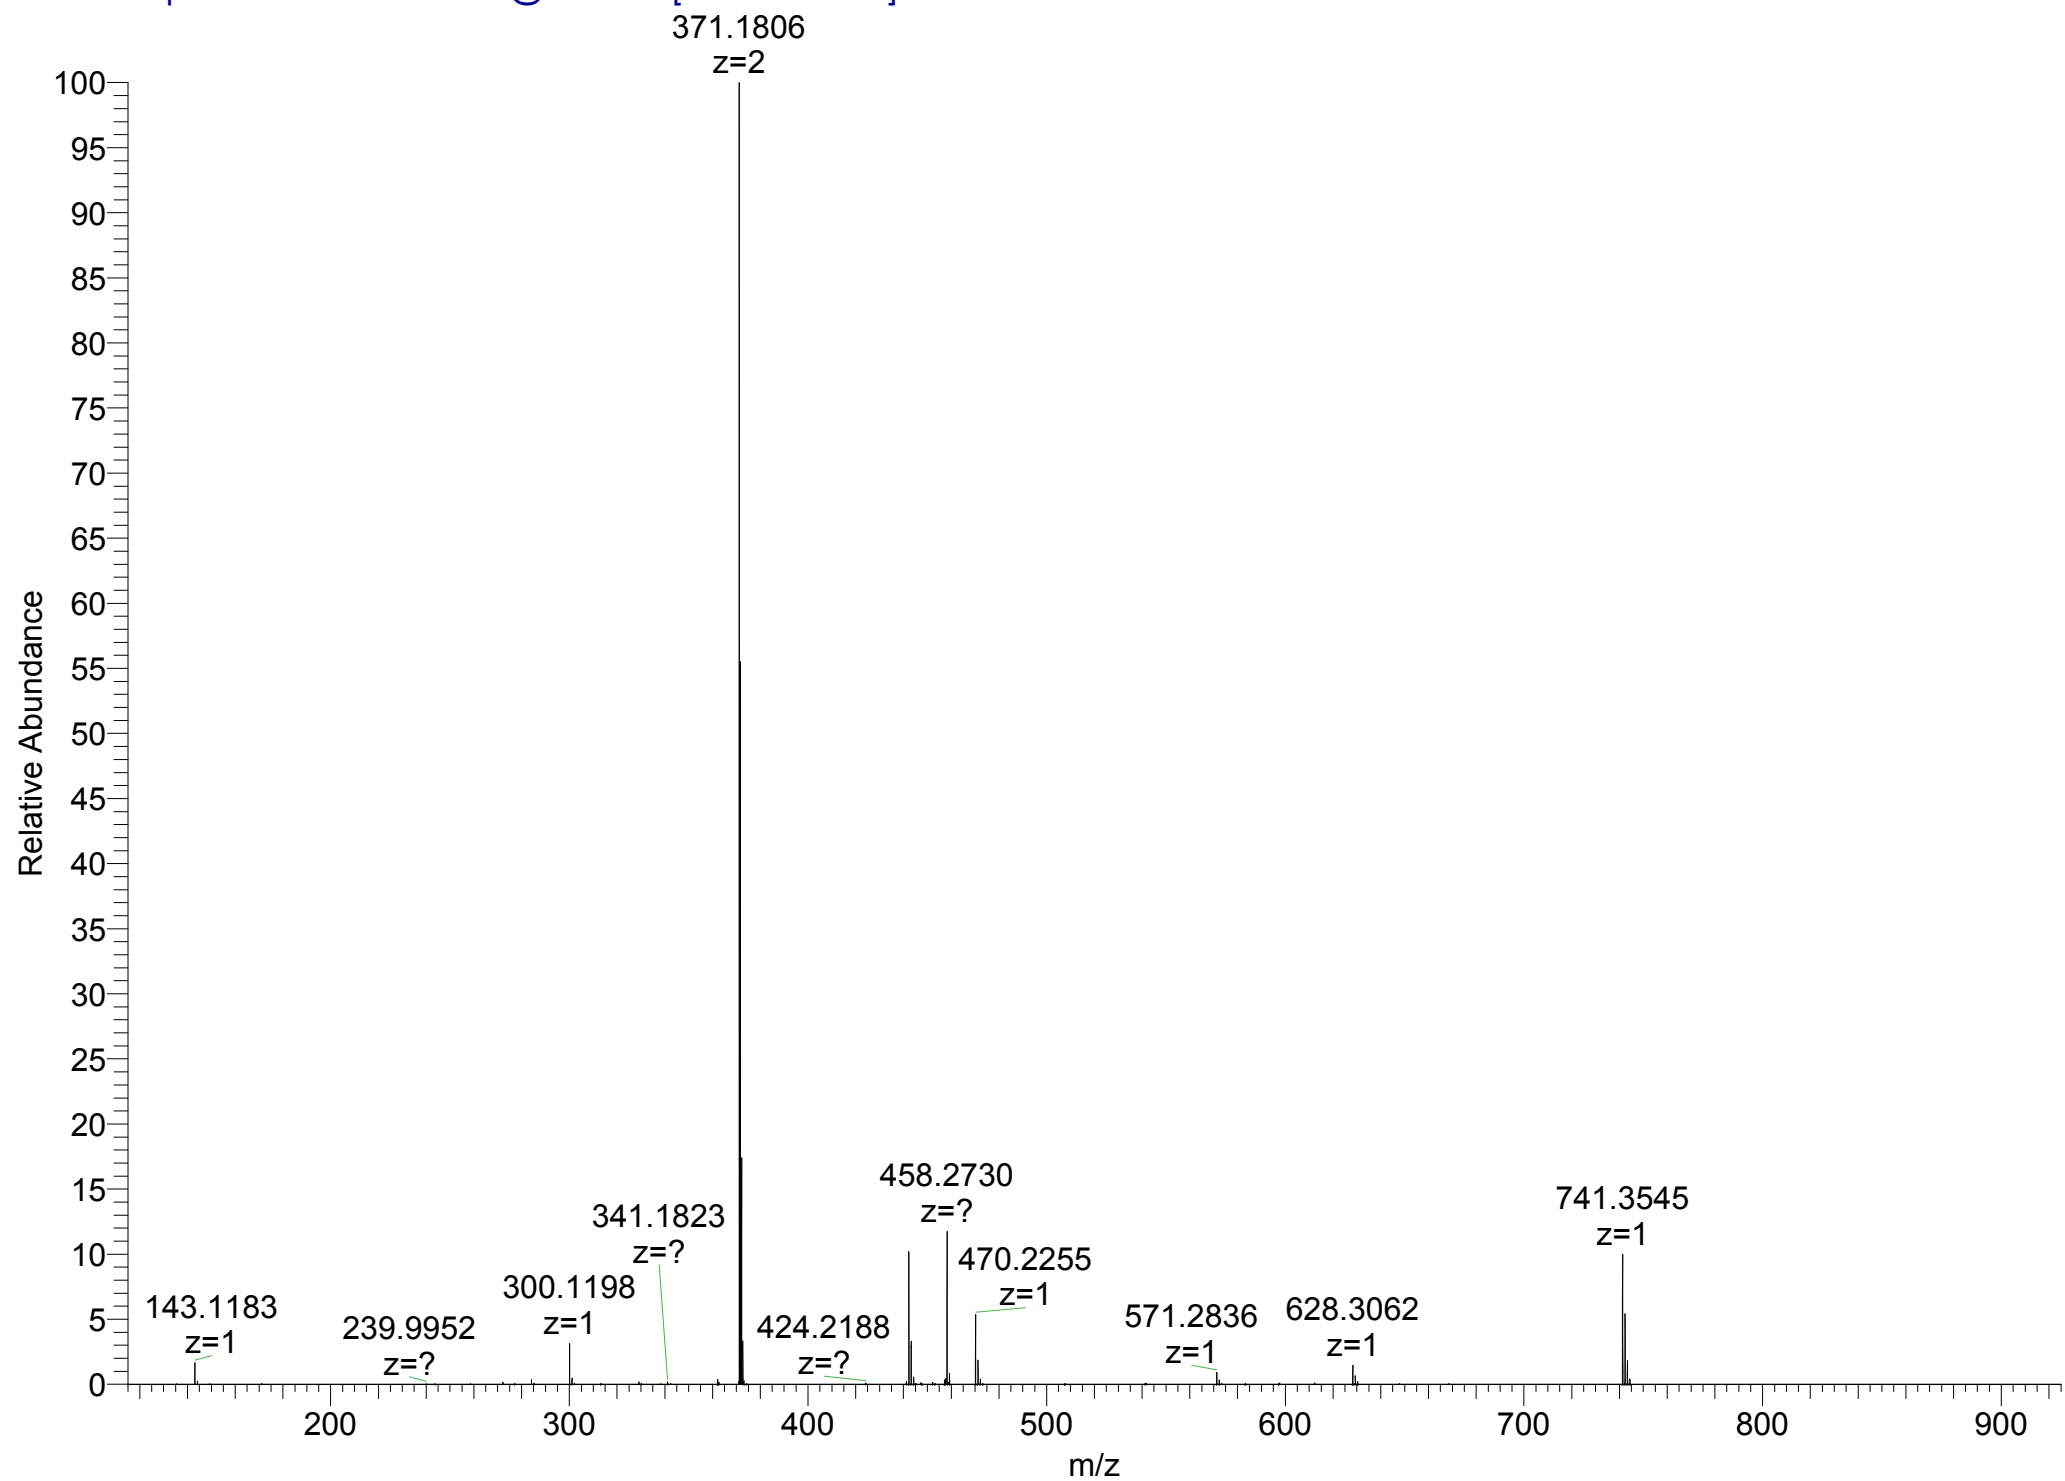

2\_2\_2012Col5a1\_Bovine\_us2Top3\_120203220224 #692 RT: 10.71 AV: 1 NL: 7.61E5

T: FTMS + p NSI d Full ms3 456.23@cid35.00 371.18@hcd30.00 [100.00-755.00]

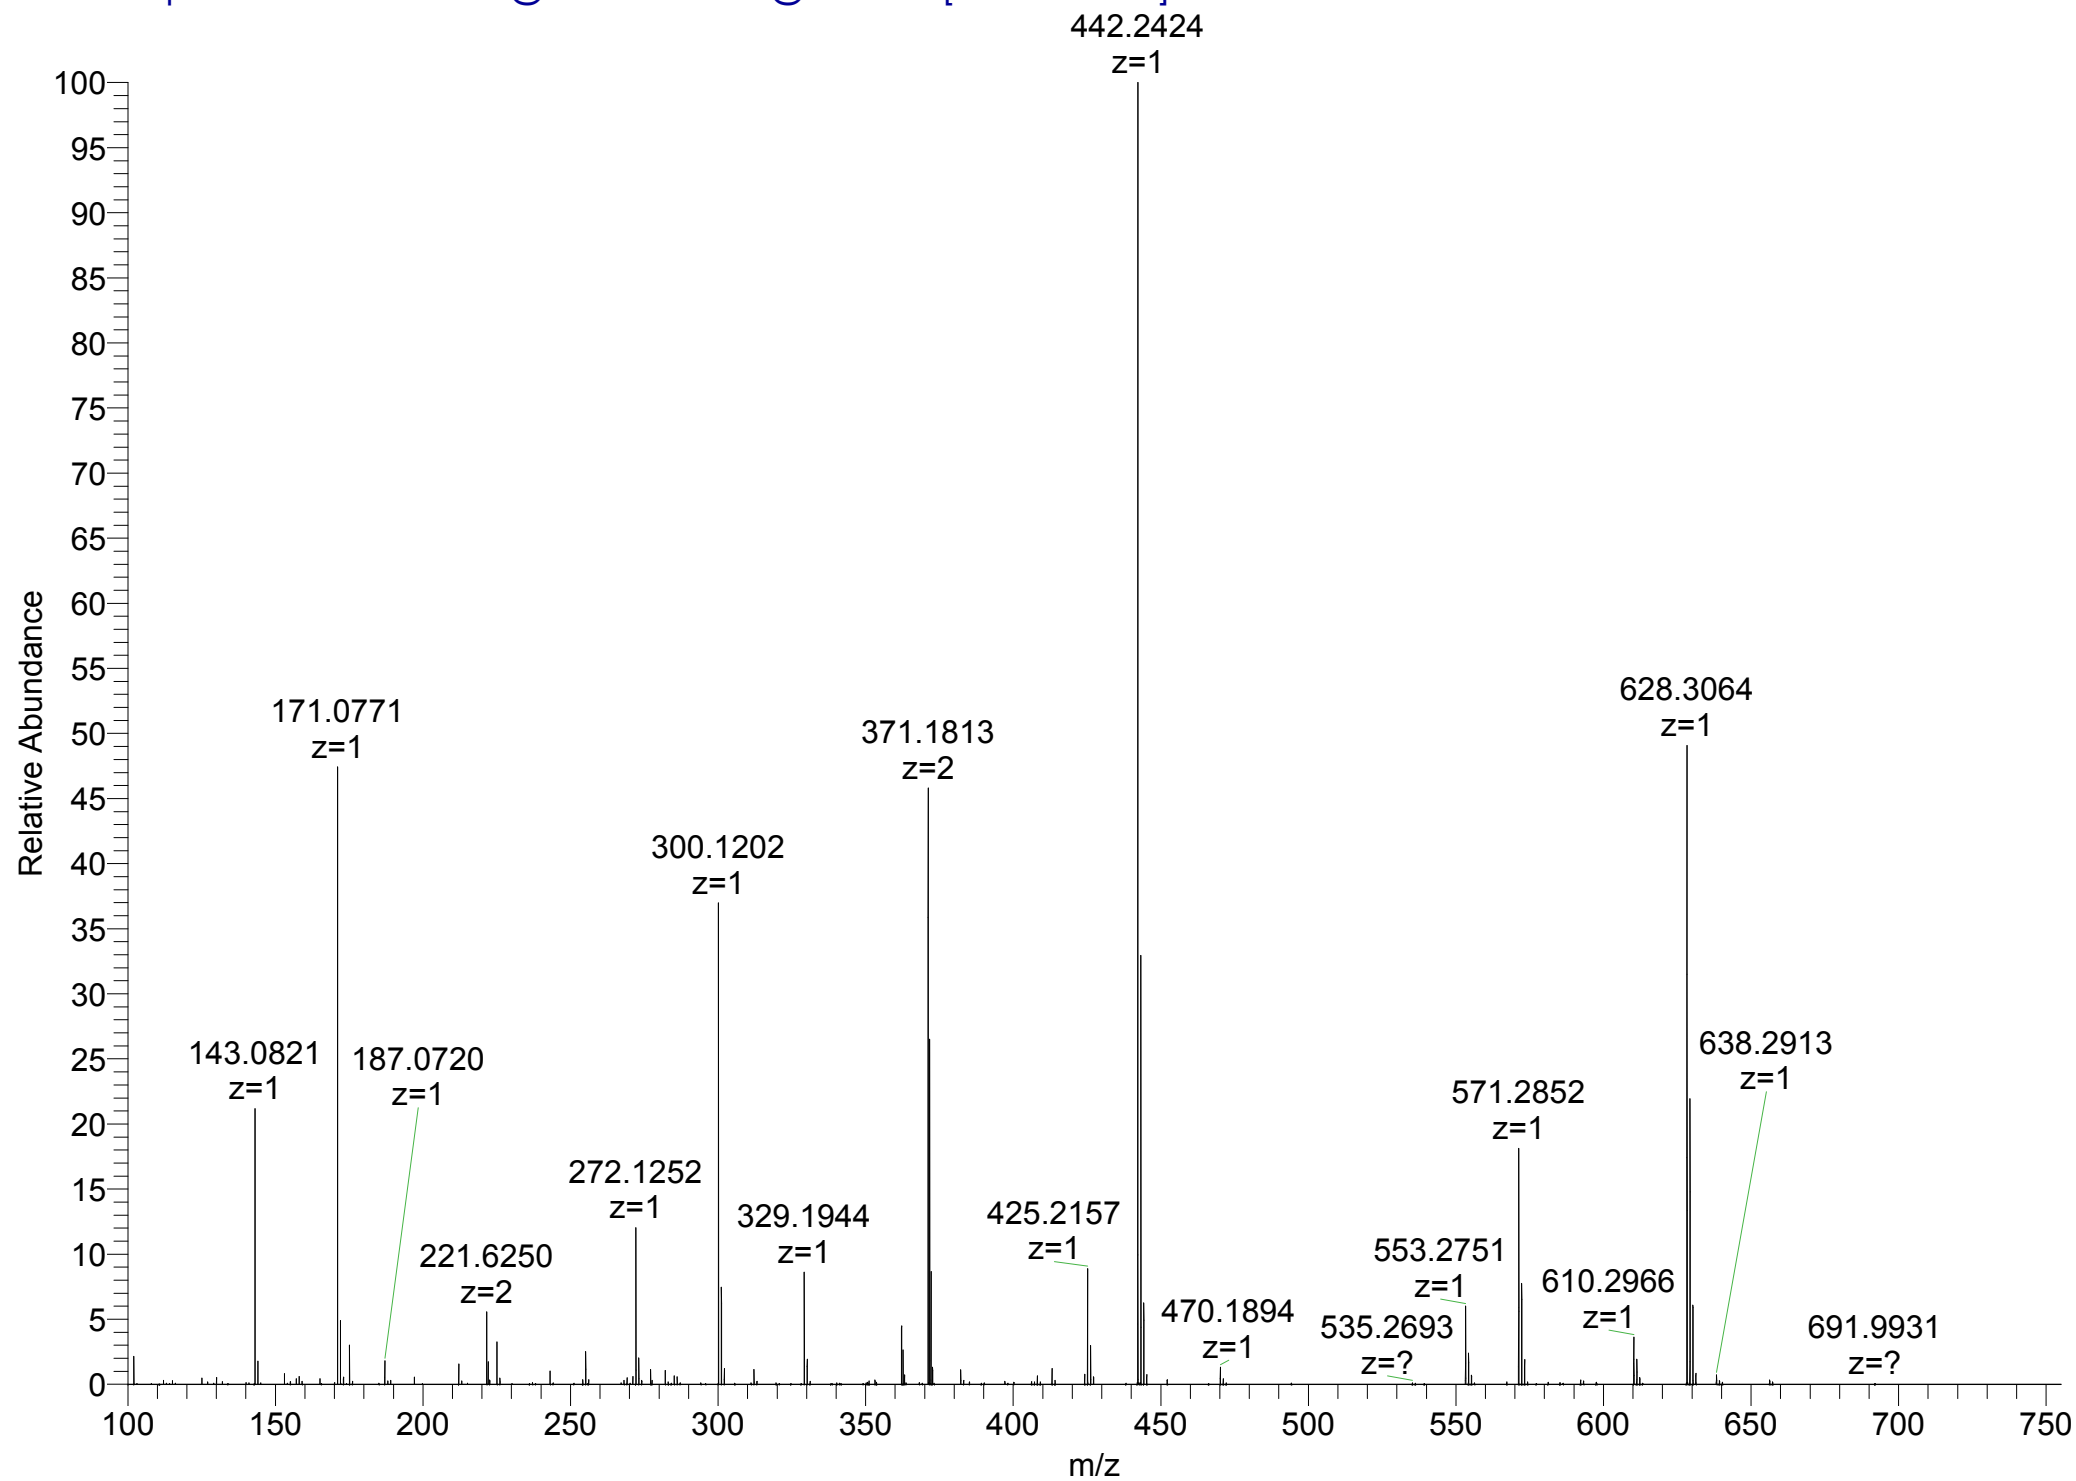



Bovine

8.

**P132-OH, P135-OH, P137-OH, P138-OH, P147-OH**

#130-150: GPPPGPPGVTGMDGQPGPK

| Ion                         | charge state | Theoretical m/z (mono) | Experimental m/z (mono) | Mass error (Da) | Mass error (PPM) |
|-----------------------------|--------------|------------------------|-------------------------|-----------------|------------------|
| [M+2H]+5OH                  | 2            | 988.9546               | 988.9532                | -0.0028         | -1.4             |
| a2/GP-28                    | 1            | 127.0866               | 127.0863                | -0.0003         | -2.4             |
| b2/GP                       | 1            | 155.0815               | 155.0812                | -0.0003         | -1.9             |
| GP+OH                       | 1            | 171.0764               | 171.0761                | -0.0003         | -1.8             |
| y2                          | 1            | 244.1656               | 244.1652                | -0.0004         | -1.6             |
| b3/GPP+OH                   | 1            | 268.1292               | 268.1288                | -0.0004         | -1.5             |
| b4/GPPG+OH                  | 1            | 325.1506               | 325.1504                | -0.0002         | -0.6             |
| y4+OH                       | 1            | 414.2347               | 414.2339                | -0.0008         | -1.9             |
| y5-NH3+OH/<br>PGPPGV-28+3OH | 1            | 525.2667               | 525.2665                | -0.0002         | -0.4             |
| y6+OH                       | 1            | 599.3148               | 599.3141                | -0.0007         | -1.2             |
| y14+3OH                     | 2            | 693.3219               | 693.3227                | 0.0016          | 1.2              |
| y7+OH                       | 1            | 714.3417               | 714.3380                | -0.0037         | -5.2             |
| y17+4OH                     | 2            | 826.8829               | 826.8785                | -0.0088         | -5.3             |
| y9+OH                       | 1            | 902.4036               | 902.4000                | -0.0036         | -4.0             |
| y10+OH                      | 1            | 1003.4513              | 1003.4546               | 0.0033          | 3.3              |
| y13+2OH                     | 1            | 1272.5889              | 1272.5785               | -0.0104         | -8.2             |
| y14+3OH                     | 1            | 1385.6366              | 1385.6370               | 0.0004          | 0.3              |
| y15+3OH                     | 1            | 1442.6580              | 1442.6487               | -0.0093         | -6.4             |
| y16+4OH                     | 1            | 1555.7057              | 1555.7078               | 0.0021          | 1.3              |
| y17+4OH                     | 1            | 1652.7585              | 1652.7603               | 0.0018          | 1.1              |
| y18+4OH                     | 1            | 1709.7799              | 1709.7684               | -0.0115         | -6.7             |
| y19+5OH                     | 1            | 1822.8276              | 1822.8253               | -0.0023         | -1.3             |

4\_5\_2012Col5a1\_Trypsin\_nontrapping\_HCD2 #6171 RT: 49.26 AV: 1 NL: 3.21E4

T: FTMS + p NSI d Full ms2 989.46@hcd35.00 [115.00-1990.00]

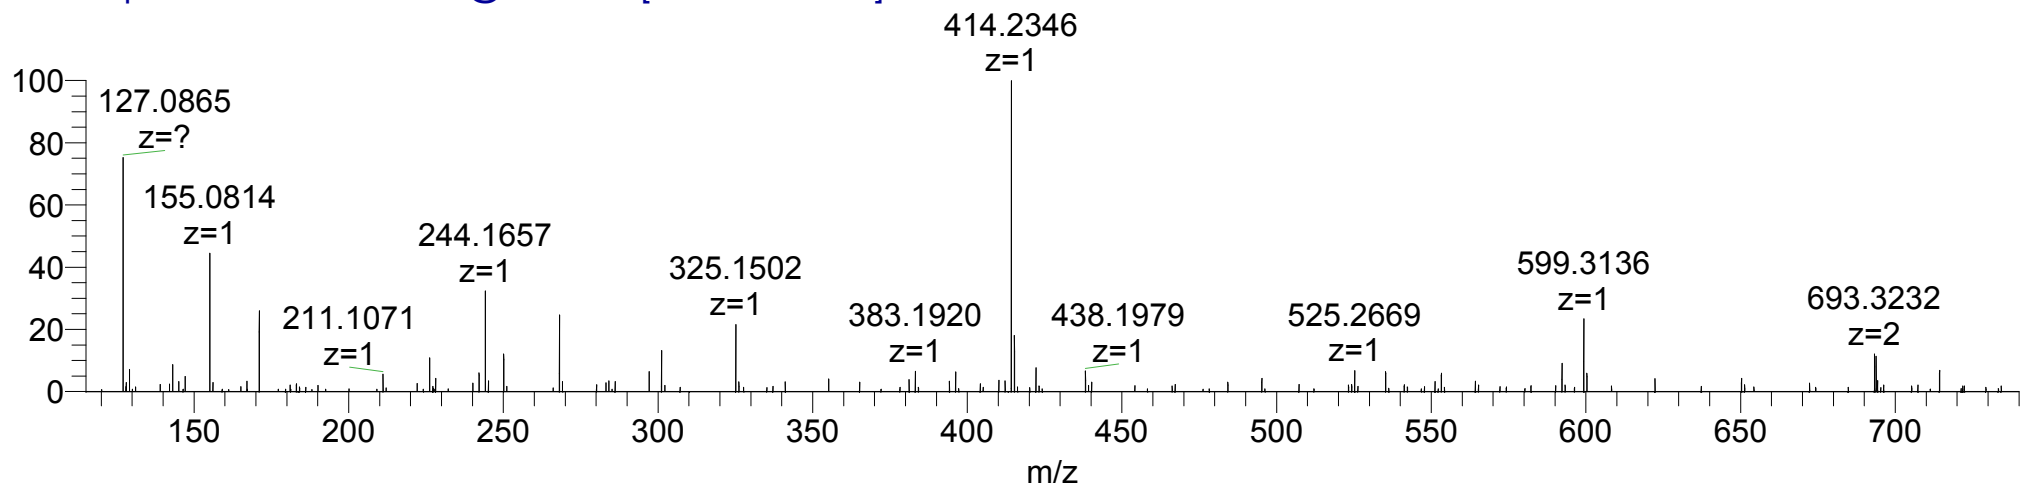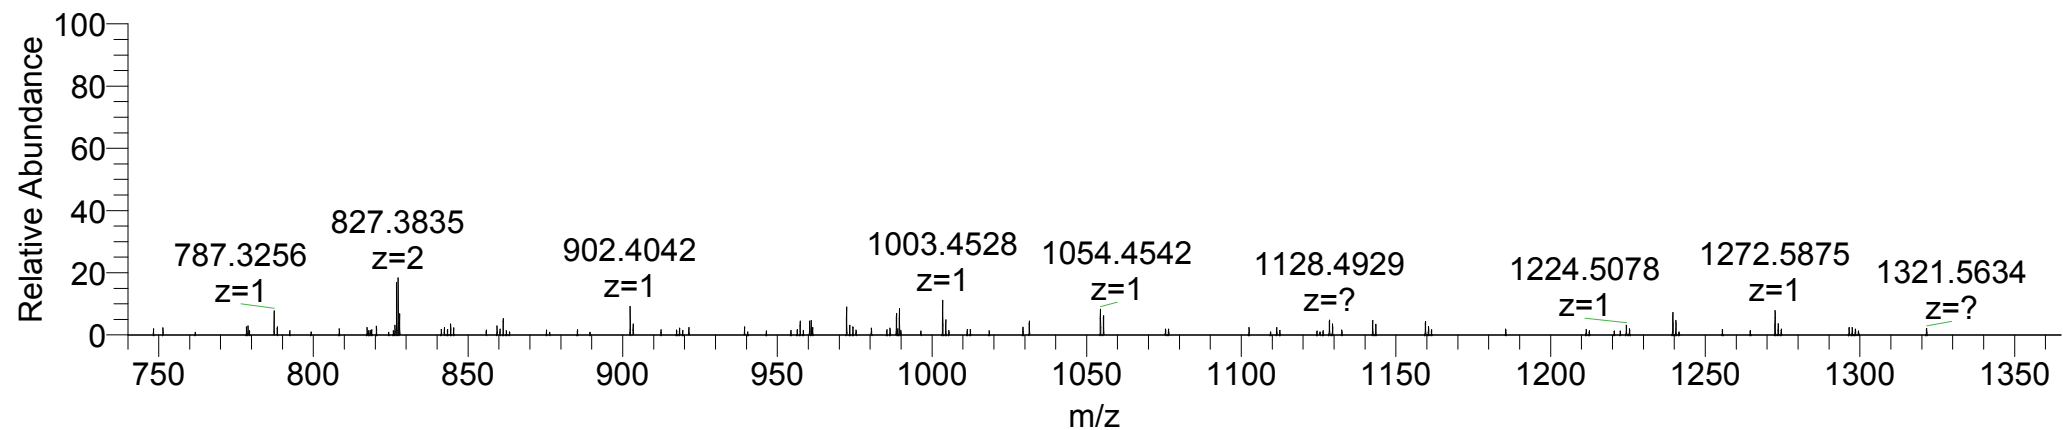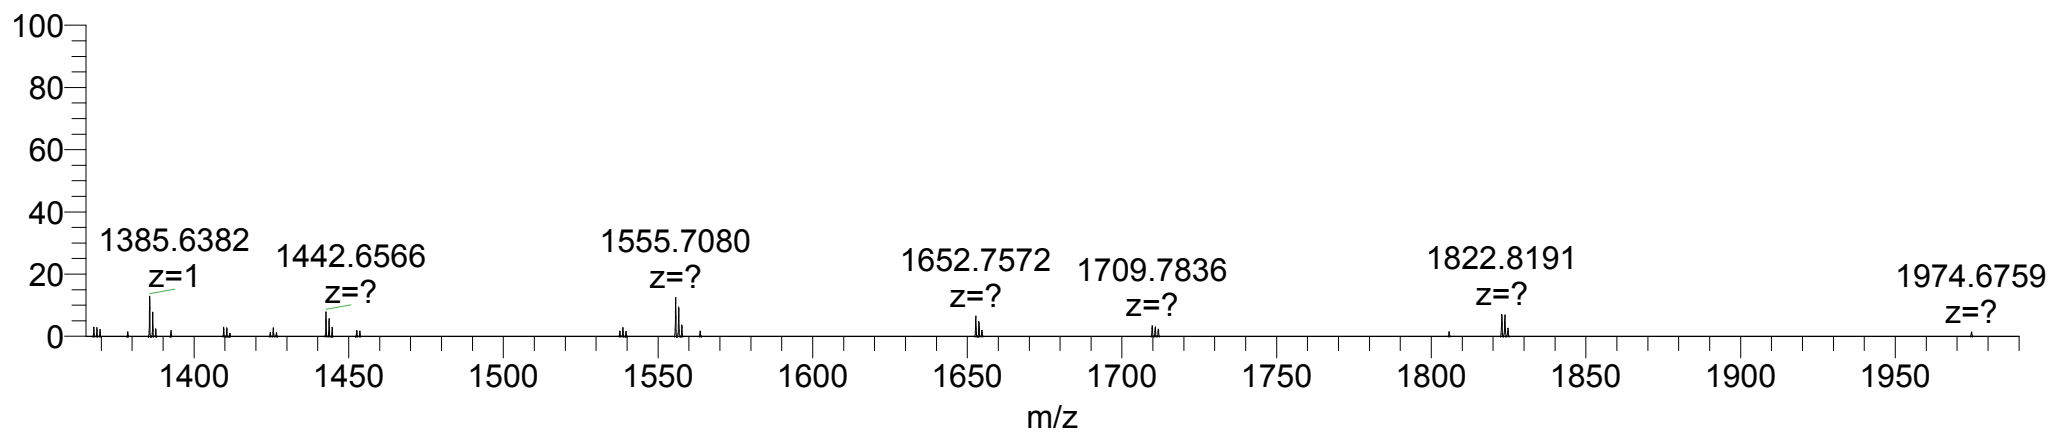

Bovine

9.

**P159-OH, P162-OH, P168-OH, P174-OH**

#151-186: GNVGPQGEPGPPGQQGNPGAQGLPGPQGAIGPPGEK

| Ion        | charge state | Theoretical m/z (mono) | Experimental m/z (mono) | Mass error (Da) | Mass error (PPM) |
|------------|--------------|------------------------|-------------------------|-----------------|------------------|
| [M+3H]+5OH | 3            | 1126.8697              | 1126.8762               | 0.0195          | 5.8              |
| y11+OH     | 2            | 533.7800               | 533.7808                | 0.0016          | 1.5              |
| y5+OH      | 1            | 543.2773               | 543.2789                | 0.0016          | 2.9              |
| y6+OH      | 1            | 600.2988               | 600.3004                | 0.0016          | 2.7              |
| y13+2OH    | 2            | 618.8146               | 618.8158                | 0.0024          | 1.9              |
| PGPQGA+OH  | 1            | 637.3304               | 637.3322                | 0.0018          | 2.8              |
| b8-NH3     | 1            | 722.3104               | 722.3130                | 0.0026          | 3.6              |
| b8         | 1            | 739.3369               | 739.3401                | 0.0032          | 4.3              |
| y16+2OH    | 2            | 767.8966               | 767.9005                | 0.0078          | 5.1              |
| y9+OH      | 1            | 841.4414               | 841.4443                | 0.0029          | 3.4              |
| y19+3OH    | 2            | 888.4498               | 888.4529                | 0.0062          | 3.5              |
| b10+OH     | 1            | 909.4061               | 909.4095                | 0.0034          | 3.7              |
| b22+3OH    | 2            | 1015.4516              | 1015.4559               | 0.0086          | 4.2              |
| b23+3OH    | 2            | 1071.9936              | 1071.9944               | 0.0016          | 0.7              |
| y25+4OH    | 2            | 1187.0751              | 1187.0697               | -0.0108         | -4.5             |
| y13+2OH    | 1            | 1236.6219              | 1236.6248               | 0.0029          | 2.3              |
| y28+5OH    | 2            | 1320.6361              | 1320.6406               | 0.0090          | 3.4              |
| b29+4OH    | 2            | 1333.6131              | 1333.6091               | -0.0080         | -3.0             |
| b30+4OH    | 2            | 1390.1552              | 1390.1565               | 0.0026          | 0.9              |
| y33+5OH    | 2            | 1554.7345              | 1554.7412               | 0.0134          | 4.3              |
| b17+2OH    | 1            | 1603.7095              | 1603.7177               | 0.0082          | 5.1              |

\*Unlocalized sites: P183-OH?,P182-OH?, K186-OH?

Pseudolocalized sites: P183-OH or K186-OH

2\_2\_2012Col5a1\_Bovine\_Top5MS3 #2274 RT: 26.50 AV: 1 NL: 7.94E4

T: FTMS + p NSI d Full ms2 1127.21@cid35.00 [300.00-2000.00]

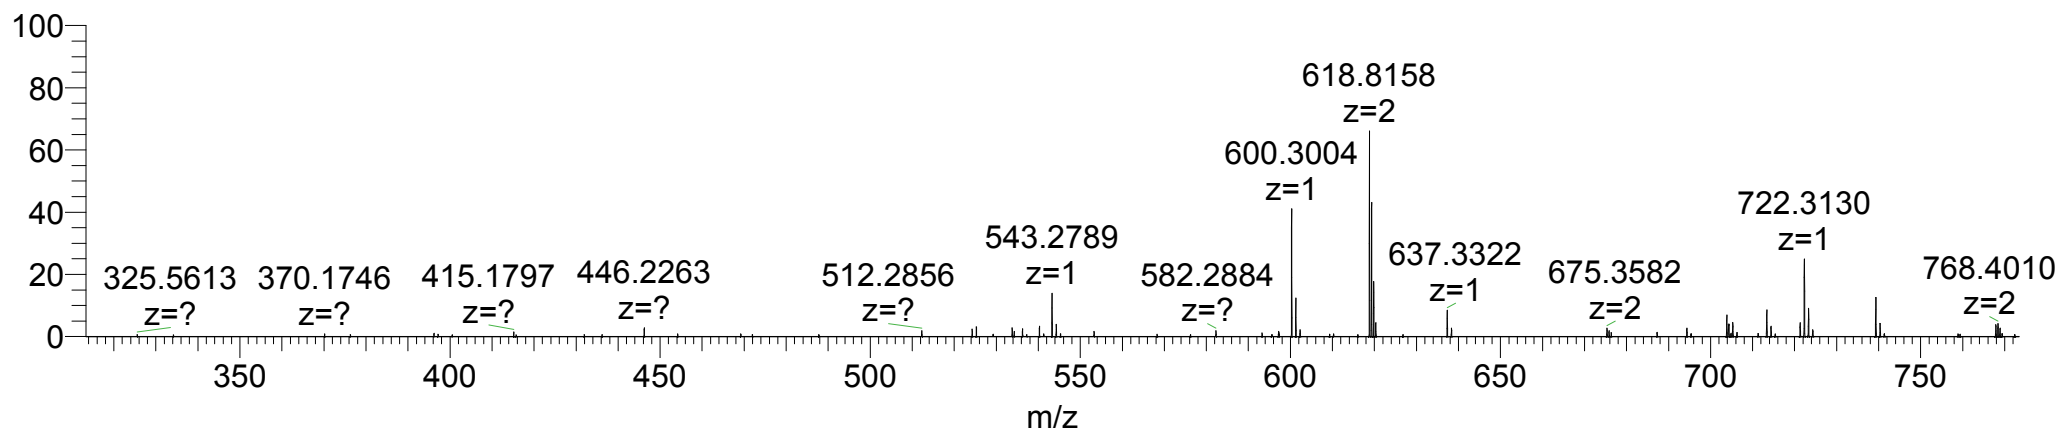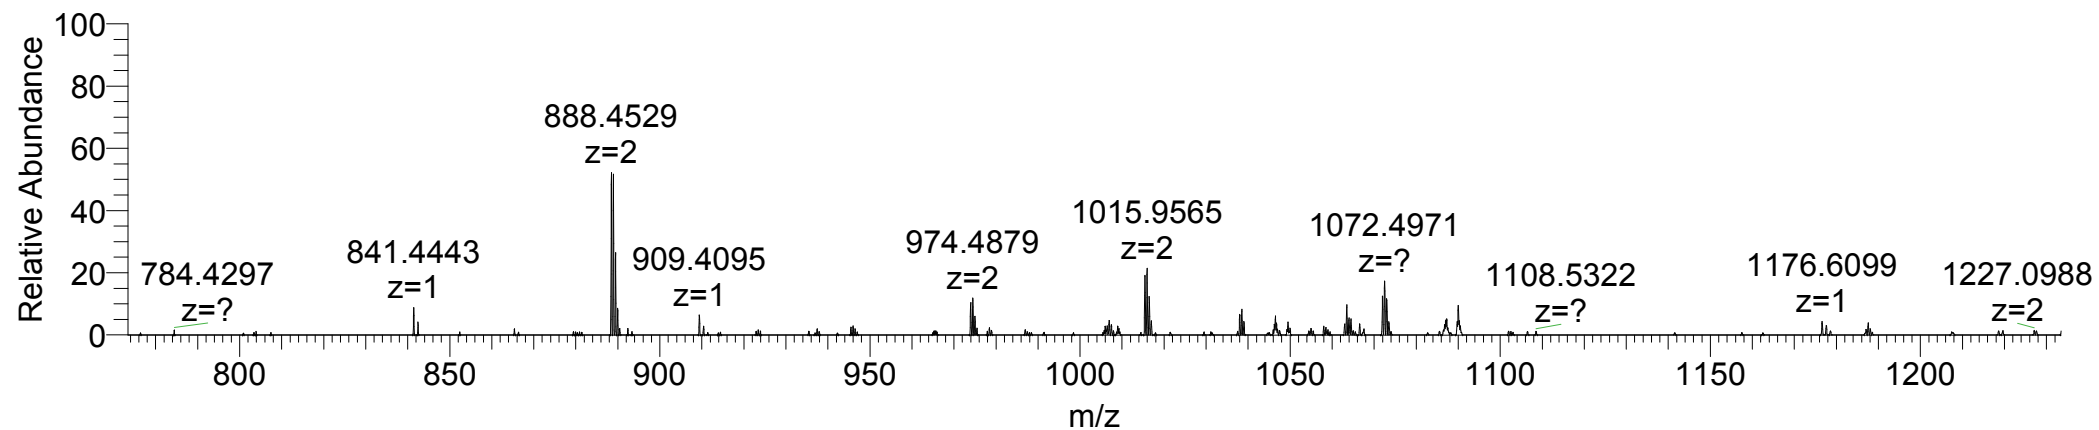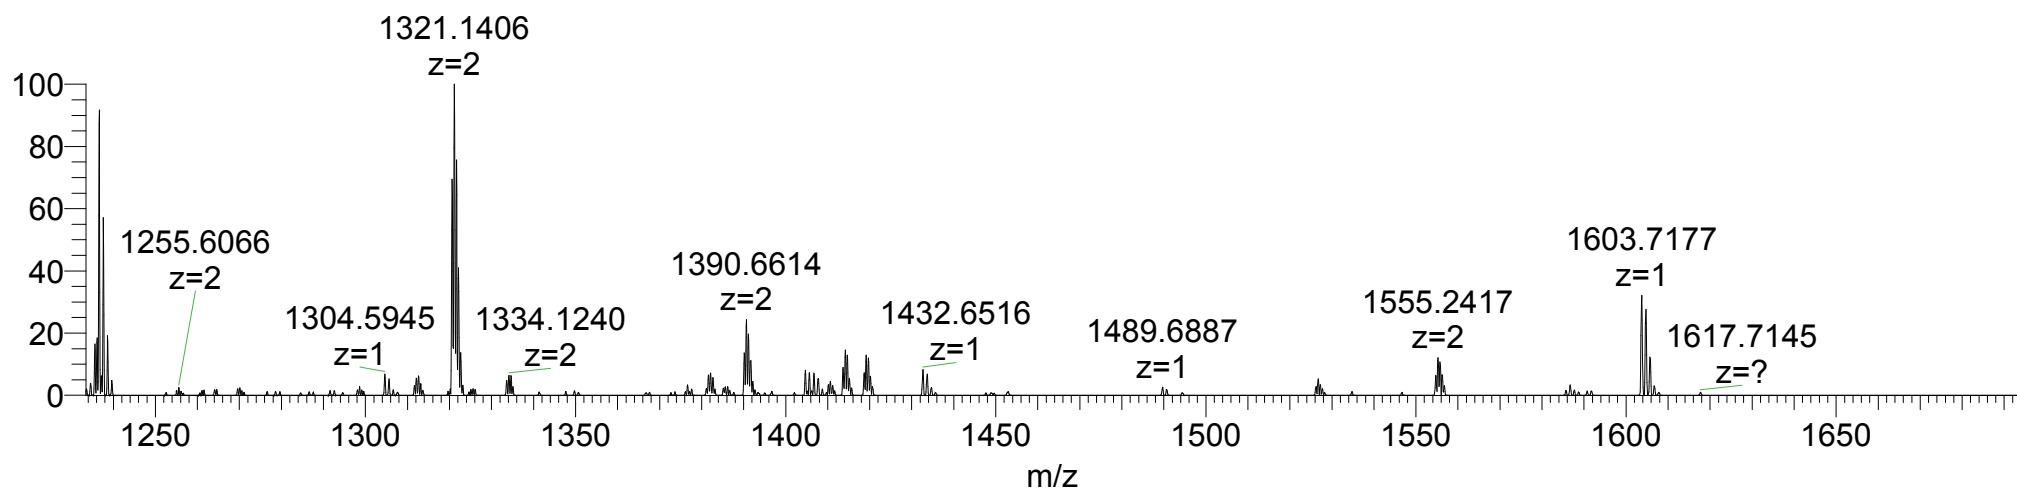

Bovine

10.

**P168-OH, P174-OH, P183-OH**

#151-186: GNVGPQGEPGPPGQQGNPGAQGLPGPQGAIGPPPGEK

| Ion        | charge state | Theoretical m/z (mono) | Experimental m/z (mono) | Mass error (Da) | Mass error (PPM) |
|------------|--------------|------------------------|-------------------------|-----------------|------------------|
| [M+3H]+5OH | 3            | 1126.8697              | 1126.8722               | 0.0075          | 2.2              |
| y1         | 1            | 147.1128               | 147.1130                | 0.0002          | 1.4              |
| PG+OH      | 1            | 171.0764               | 171.0764                | 0.0000          | 0.0              |
| a3-NH3/PQ  | 1            | 226.1186               | 226.1186                | 0.0000          | 0.0              |
| QGL/GAIG   | 1            | 299.1714               | 299.1717                | 0.0003          | 1.0              |
| PGAQ+OH    | 1            | 370.1721               | 370.1723                | 0.0002          | 0.5              |
| y4+OH      | 1            | 446.2245               | 446.2235                | -0.0010         | -2.2             |
| y5+OH      | 1            | 543.2773               | 543.2766                | -0.0007         | -1.3             |
| y6+OH      | 1            | 600.2988               | 600.2985                | -0.0003         | -0.5             |
| y13+2OH    | 2            | 618.8146               | 618.8140                | -0.0012         | -1.0             |
| QGAIGPP+OH | 1            | 637.3304               | 637.3309                | 0.0005          | 0.8              |
| b8-NH3     | 1            | 722.3104               | 722.3101                | -0.0003         | -0.4             |
| b8         | 1            | 739.3369               | 739.3361                | -0.0008         | -1.1             |
| y9+OH      | 1            | 841.4414               | 841.4402                | -0.0012         | -1.4             |
| y19+3OH    | 2            | 888.4498               | 888.4515                | 0.0034          | 1.9              |
| b22+3OH    | 2            | 1015.4516              | 1015.4552               | 0.0072          | 3.5              |
| y11+OH     | 1            | 1066.5527              | 1066.5626               | 0.0099          | 9.3              |
| y12+OH     | 1            | 1123.5742              | 1123.5701               | -0.0041         | -3.6             |
| y13+2OH    | 1            | 1236.6219              | 1236.6210               | -0.0009         | -0.7             |

**\*Unlocalized sites: P159-OH?, P161-OH?, P162-OH?**

**Pseudolocalized sites: P159-OH, P162-OH**

2\_2\_2012Col5a1\_Bovine\_HCD1\_CE30 #3161 RT: 26.16 AV: 1 NL: 9.54E4

T: FTMS + p NSI d Full ms2 1126.87@hcd30.00 [100.00-2000.00]

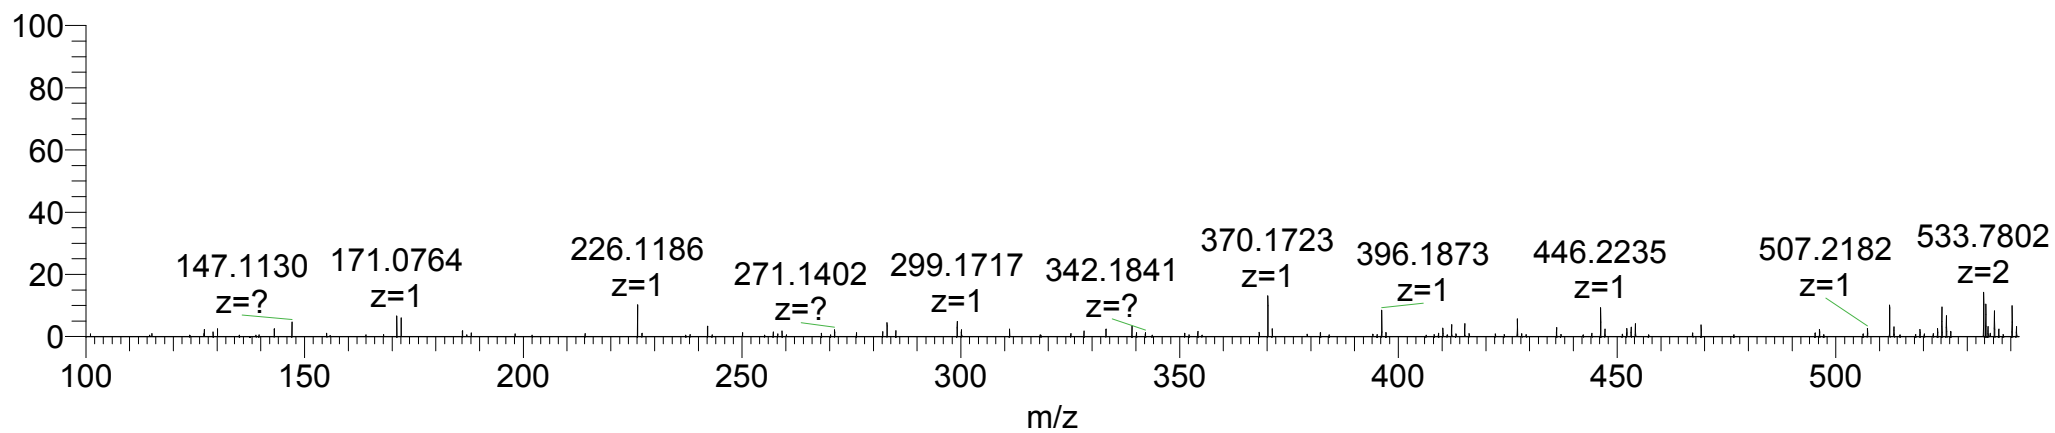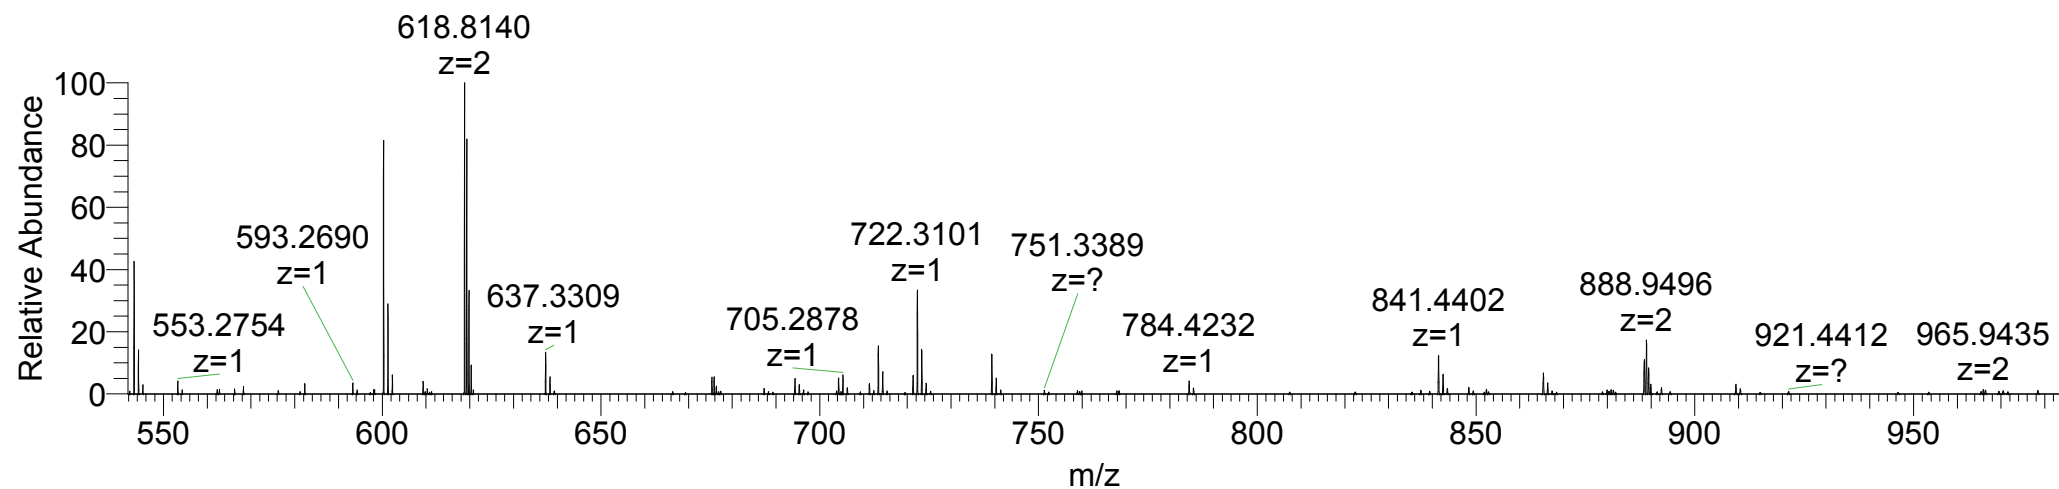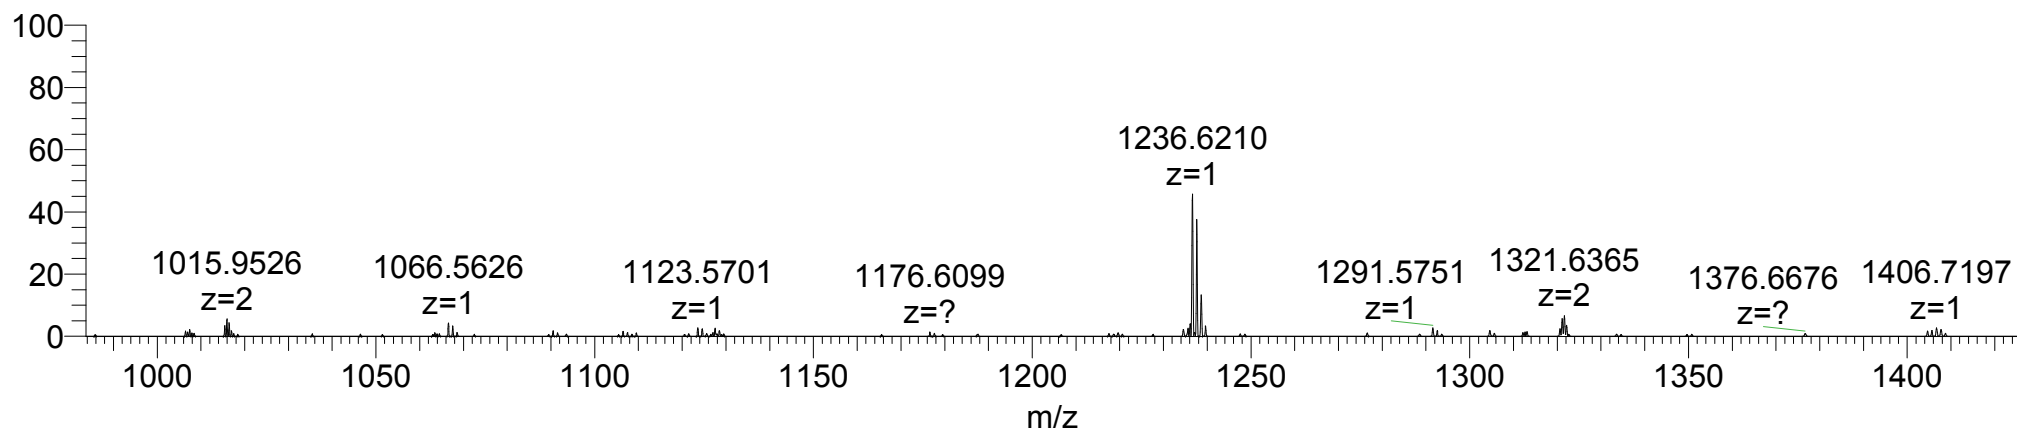

Bovine

11.

**K186-OH, P192-OH, P198-OH**

#186-200: KGPLGKPGLPGMPGA

| Ion                       | charge state | Theoretical m/z (mono) | Experimental m/z (mono) | Mass error (Da) | Mass error (PPM) |
|---------------------------|--------------|------------------------|-------------------------|-----------------|------------------|
| [M+2H]+4OH                | 2            | 720.8794               | 720.8795                | 0.0002          | 0.1              |
| PG+OH                     | 1            | 127.0866               | 127.0866                | 0.0000          | 0.0              |
| y3+OH                     | 1            | 260.1241               | 260.1241                | 0.0000          | 0.0              |
| PLGK                      | 1            | 396.2605               | 396.2605                | 0.0000          | 0.0              |
| KGPLG/GPLGK               | 1            | 453.2820               | 453.2821                | 0.0001          | 0.2              |
| y6+2OH                    | 1            | 561.2337               | 561.2338                | 0.0001          | 0.2              |
| LPGMPG+2OH                | 1            | 585.2701               | 585.2687                | -0.0014         | -2.4             |
| PLGKPGL+OH/<br>LGKPGLP+OH | 1            | 679.4137               | 679.4163                | 0.0026          | 3.8              |
| GPLGKPGL+OH               | 1            | 736.4352               | 736.4358                | 0.0006          | 0.8              |
| GKPGLPGM+2OH              | 1            | 770.3865               | 770.3874                | 0.0009          | 1.2              |
| y9+3OH                    | 1            | 844.3869               | 844.3828                | -0.0041         | -4.9             |
| b9+2OH                    | 1            | 880.5251               | 880.5262                | 0.0011          | 1.2              |
| b12+3OH                   | 1            | 1181.6347              | 1181.6378               | 0.0031          | 2.6              |

\*Unlocalized sites: P195-OH?, M198-oxidation?

4\_5\_2012Col5a1\_GluCandAspN\_HCD1 #2972 RT: 15.72 AV: 1 NL: 3.18E7

T: FTMS + p NSI d Full ms2 720.88@hcd35.00 [115.00-1455.00]

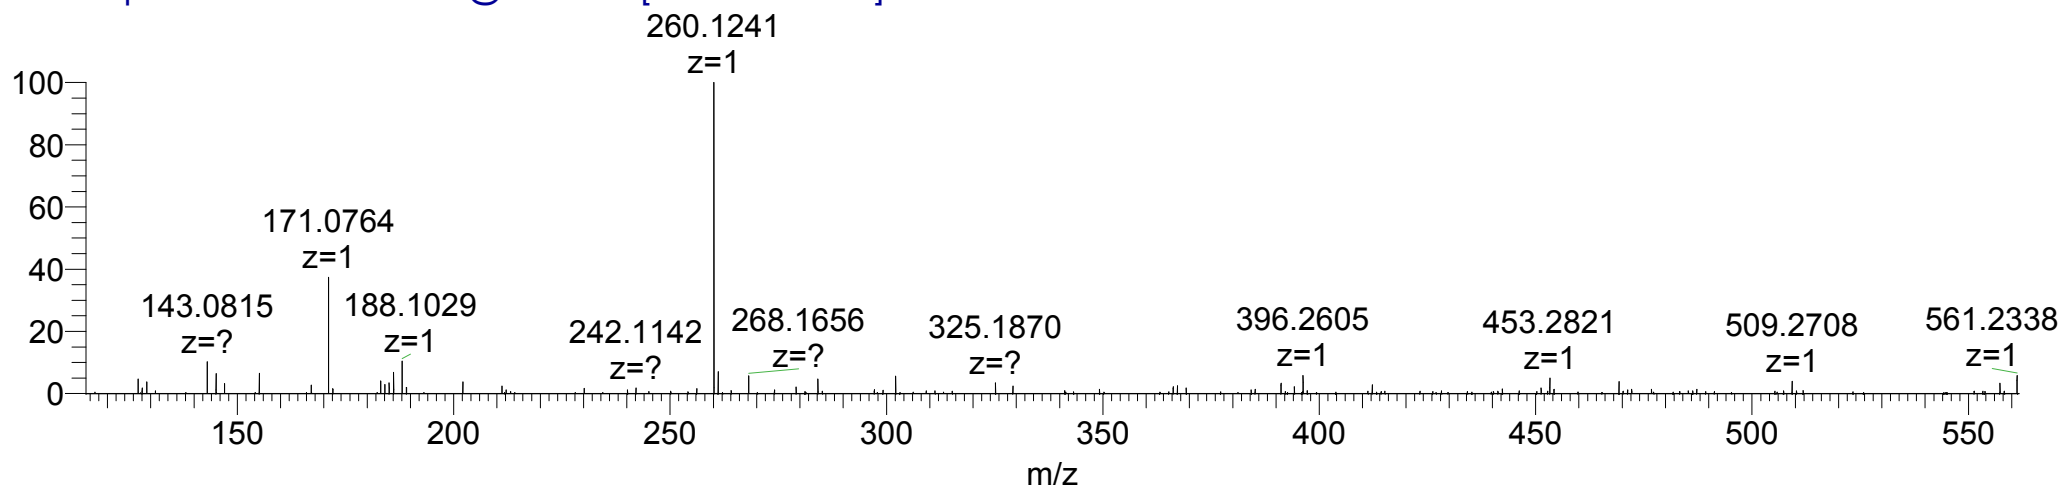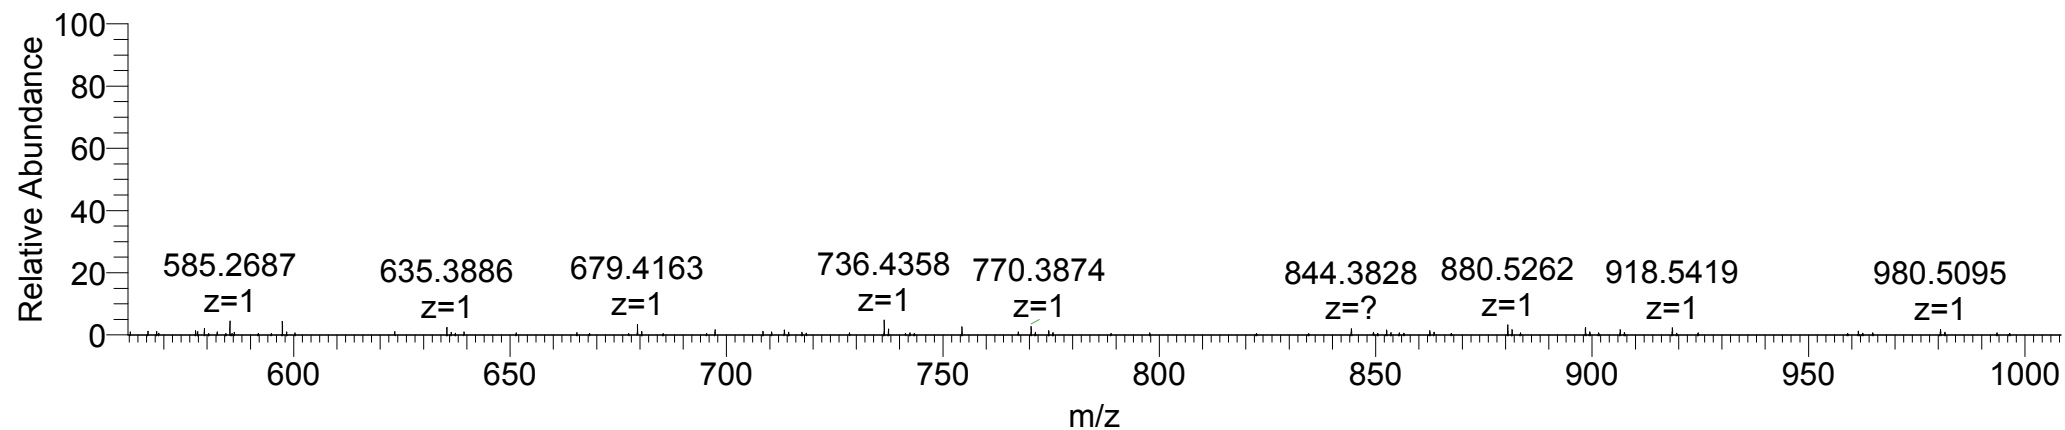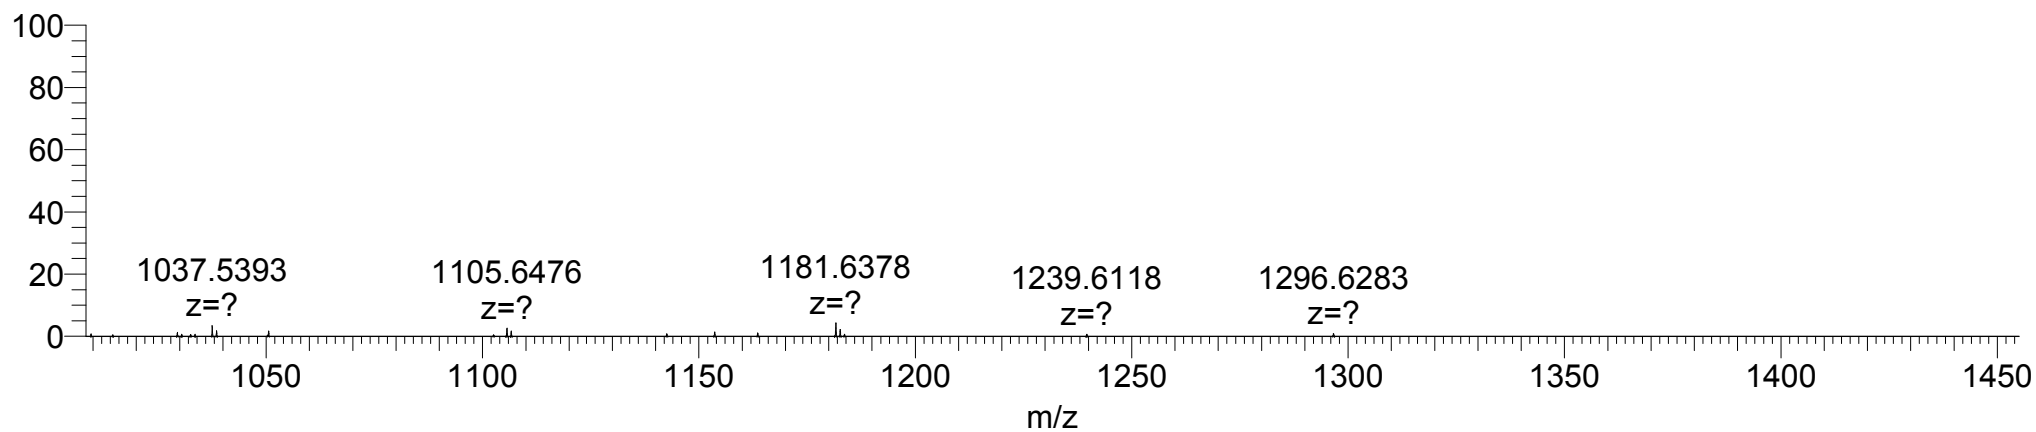



Bovine

12.

P195-OH, P198-OH, P204-OH

#187-209: GPLGKPGLPGMPGADGPPGHPPGK

| Ion                                               | charge state | Theoretical m/z (mono) | Experimental m/z (mono) | Mass error (Da) | Mass error (PPM) |
|---------------------------------------------------|--------------|------------------------|-------------------------|-----------------|------------------|
| [M+4H]+4OH                                        | 4            | 539.5205               | 539.5208                | 0.0012          | 0.6              |
| a2/GP-28                                          | 1            | 127.0866               | 127.0867                | 0.0001          | 0.8              |
| GP/b2                                             | 1            | 155.0815               | 155.0816                | 0.0001          | 0.6              |
| GP+OH                                             | 1            | 171.0764               | 171.0766                | 0.0002          | 1.2              |
| GK                                                | 1            | 186.1237               | 186.1237                | 0.0000          | 0.0              |
| PGA+OH                                            | 1            | 242.1135               | 242.1139                | 0.0004          | 1.7              |
| b3/PLG                                            | 1            | 268.1656               | 268.1658                | 0.0002          | 0.7              |
| GMP+OH                                            | 1            | 302.1169               | 302.1173                | 0.0004          | 1.3              |
| y3+OH                                             | 1            | 317.1819               | 317.1822                | 0.0003          | 0.9              |
| a8                                                | 2            | 346.7263               | 346.7267                | 0.0008          | 1.2              |
| PGAD+OH                                           | 1            | 357.1405               | 357.1406                | 0.0001          | 0.3              |
| y7+2OH                                            | 2            | 361.1850               | 361.1853                | 0.0006          | 0.8              |
| y8+2OH                                            | 2            | 389.6958               | 389.6953                | -0.0010         | -1.3             |
| b5                                                | 1            | 453.2820               | 453.2825                | 0.0005          | 1.1              |
| y15+4OH                                           | 3            | 479.2139               | 479.2148                | 0.0027          | 1.9              |
| y12-H2O+3OH                                       | 2            | 558.7571               | 558.7573                | 0.0004          | 0.4              |
| y12+3OH                                           | 2            | 567.7624               | 567.7620                | -0.0008         | -0.7             |
| y6+2OH                                            | 1            | 624.3100               | 624.3101                | 0.0001          | 0.2              |
| y13+3OH                                           | 2            | 633.2826               | 633.2814                | -0.0024         | -1.9             |
| b8                                                | 2            | 720.4403               | 720.4404                | 0.0002          | 0.1              |
| y7+2OH                                            | 1            | 721.3628               | 721.3654                | 0.0026          | 3.6              |
| y8+2OH                                            | 1            | 778.3842               | 778.3853                | 0.0011          | 1.4              |
| ADGPPGHPG+2OH/<br>GADGPPGHP+2OH/<br>PGADGPPGH+2OH | 1            | 818.3428               | 818.3422                | -0.0006         | -0.7             |
| b10                                               | 1            | 890.5094               | 890.5096                | 0.0002          | 0.2              |
| y12+3OH                                           | 1            | 1134.5174              | 1134.5186               | 0.0012          | 1.1              |

\*Unlocalized sites: P207-OH?, K209-OH?

Pseudolocalized sites: P207-OH

2\_2\_2012Col5a1\_Bovine\_HCD1\_CE30 #2331 RT: 19.41 AV: 1 NL: 2.91E6

T: FTMS + p NSI d Full ms2 539.77@hcd30.00 [100.00-2000.00]

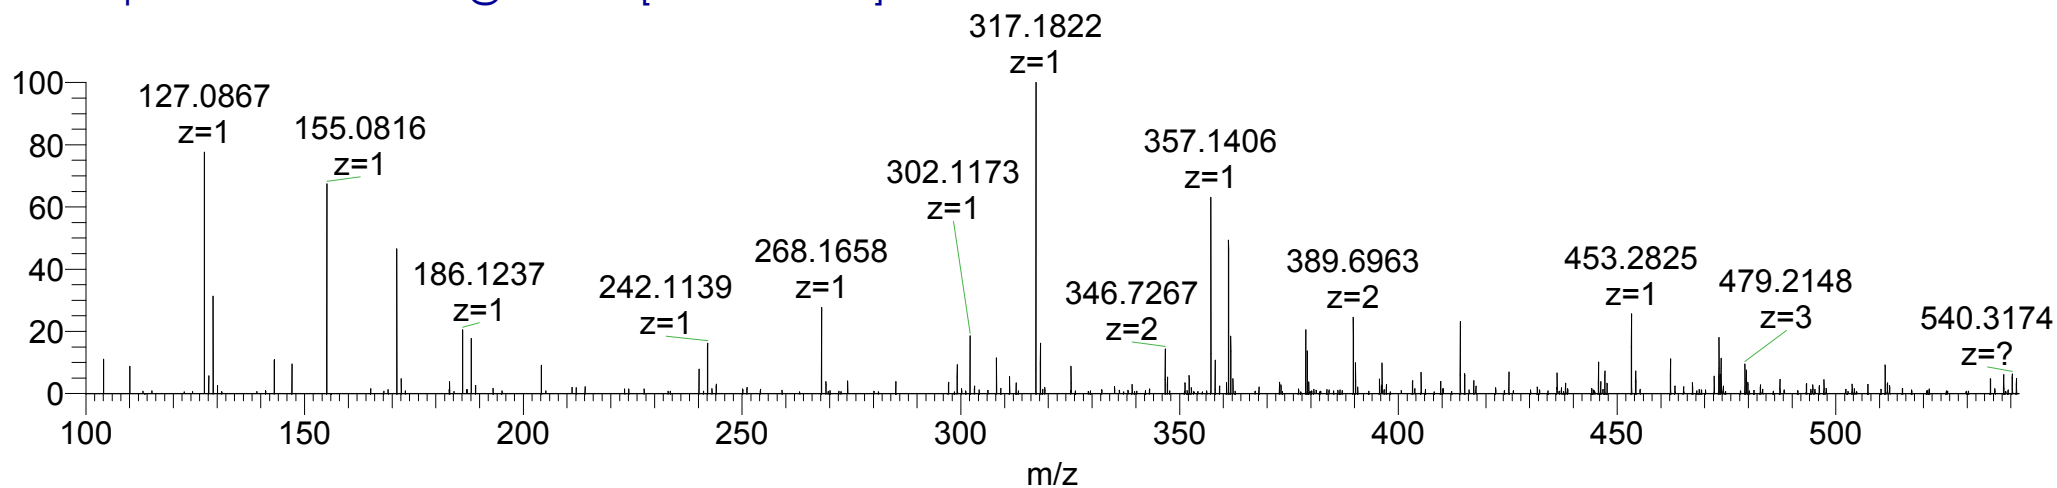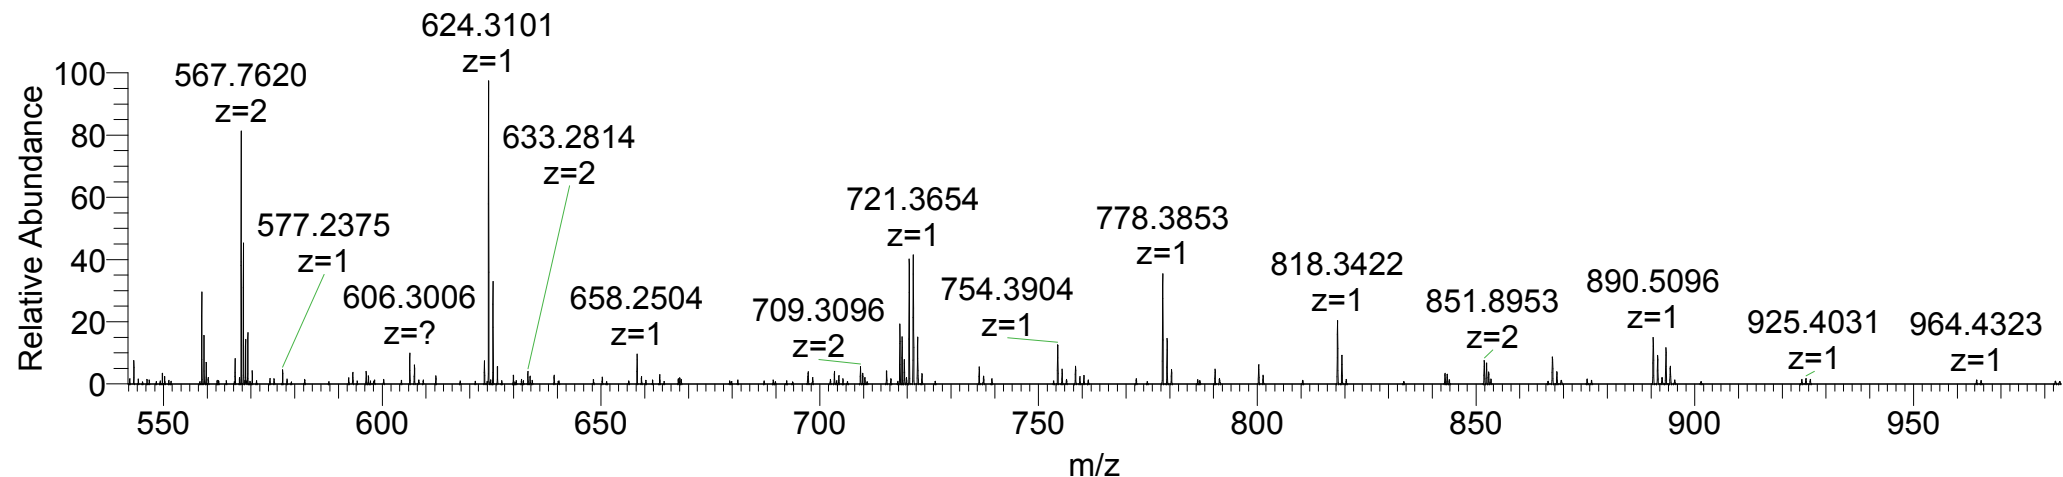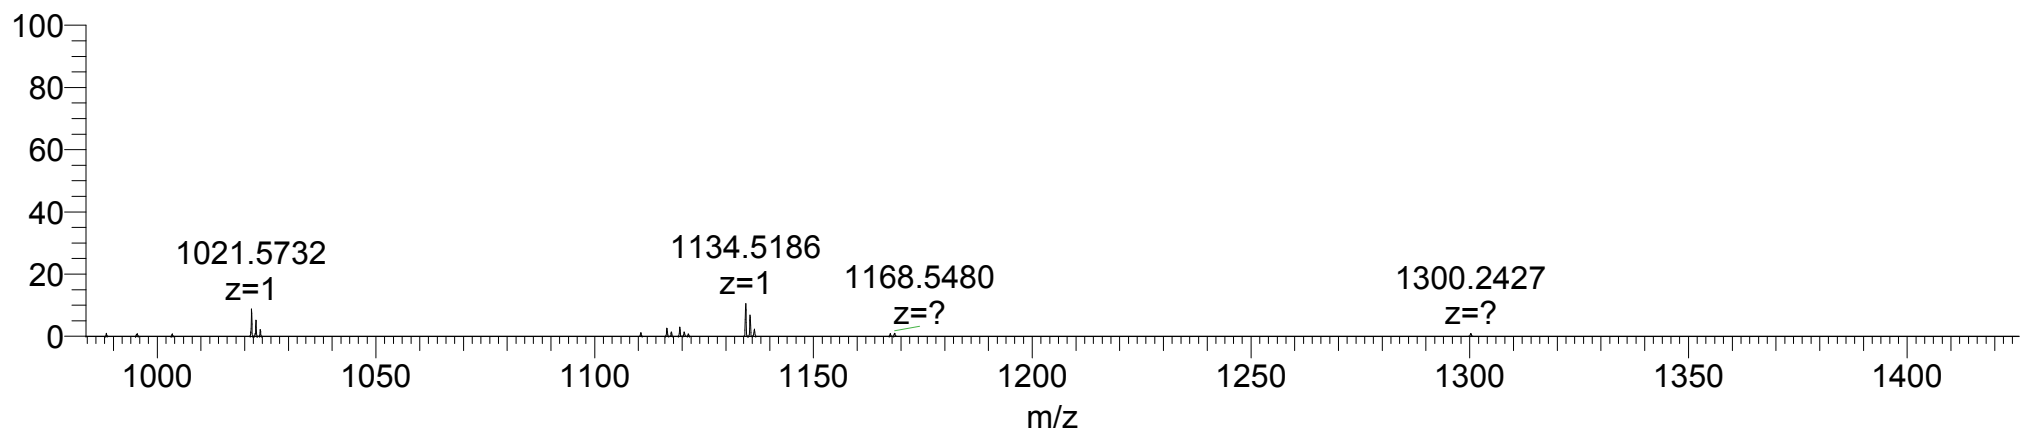

Bovine

13.

P198-OH, P204-OH, P207-OH

#187-209: GPLGKPGLPGMPGADGPPPGHPGK

| Ion           | charge state | Theoretical m/z (mono) | Experimental m/z (mono) | Mass error (Da) | Mass error (PPM) |
|---------------|--------------|------------------------|-------------------------|-----------------|------------------|
| [M+4H]+3OH    | 4            | 535.5217               | 535.5237                | 0.0080          | 3.7              |
| a2/GP-28      | 1            | 127.0866               | 127.0871                | 0.0005          | 3.9              |
| b2/GP         | 1            | 155.0815               | 155.0820                | 0.0005          | 3.2              |
| GP+OH         | 1            | 171.0764               | 171.0770                | 0.0006          | 3.5              |
| GK            | 1            | 186.1237               | 186.1243                | 0.0006          | 3.2              |
| y2            | 1            | 204.1343               | 204.1349                | 0.0006          | 2.9              |
| PGA+OH        | 1            | 242.1135               | 242.1145                | 0.0010          | 4.1              |
| b3/PLG        | 1            | 268.1656               | 268.1664                | 0.0008          | 3.0              |
| y3+OH         | 1            | 317.1819               | 317.1829                | 0.0010          | 3.2              |
| a8            | 2            | 346.7263               | 346.7274                | 0.0022          | 3.2              |
| PGAD+OH       | 1            | 357.1405               | 357.1414                | 0.0009          | 2.5              |
| y8+2OH        | 2            | 389.6958               | 389.6973                | 0.0030          | 3.8              |
| b5            | 1            | 453.2820               | 453.2836                | 0.0016          | 3.5              |
| y12-H2O+3OH   | 2            | 558.7571               | 558.7582                | 0.0022          | 2.0              |
| y12+3OH       | 2            | 567.7624               | 567.7636                | 0.0024          | 2.1              |
| b7/GKPGLPG    | 1            | 607.3562               | 607.3600                | 0.0038          | 6.3              |
| y6+2OH        | 1            | 624.3100               | 624.3124                | 0.0024          | 3.8              |
| PGMPGAD+OH    | 1            | 642.2552               | 642.2564                | 0.0012          | 1.9              |
| y15+3OH       | 2            | 710.3197               | 710.3212                | 0.0030          | 2.1              |
| b8/LGKPGLPG   | 1            | 720.4403               | 720.4422                | 0.0019          | 2.6              |
| y8+2OH        | 1            | 778.3842               | 778.3860                | 0.0018          | 2.3              |
| GADGPPGHP+2OH | 1            | 818.3428               | 818.3447                | 0.0019          | 2.3              |
| b10           | 1            | 874.5145               | 874.5154                | 0.0009          | 1.0              |
| y9+2OH        | 1            | 893.4112               | 893.4116                | 0.0004          | 0.4              |
| b11           | 1            | 1005.5550              | 1005.5596               | 0.0046          | 4.6              |
| y12+3OH       | 1            | 1134.5174              | 1134.5208               | 0.0034          | 3.0              |

2\_2\_2012Col5a1\_Bovine\_HCD2\_CE30 #2602 RT: 23.29 AV: 1 NL: 1.12E5

T: FTMS + p NSI d Full ms2 535.77@hcd30.00 [100.00-2000.00]

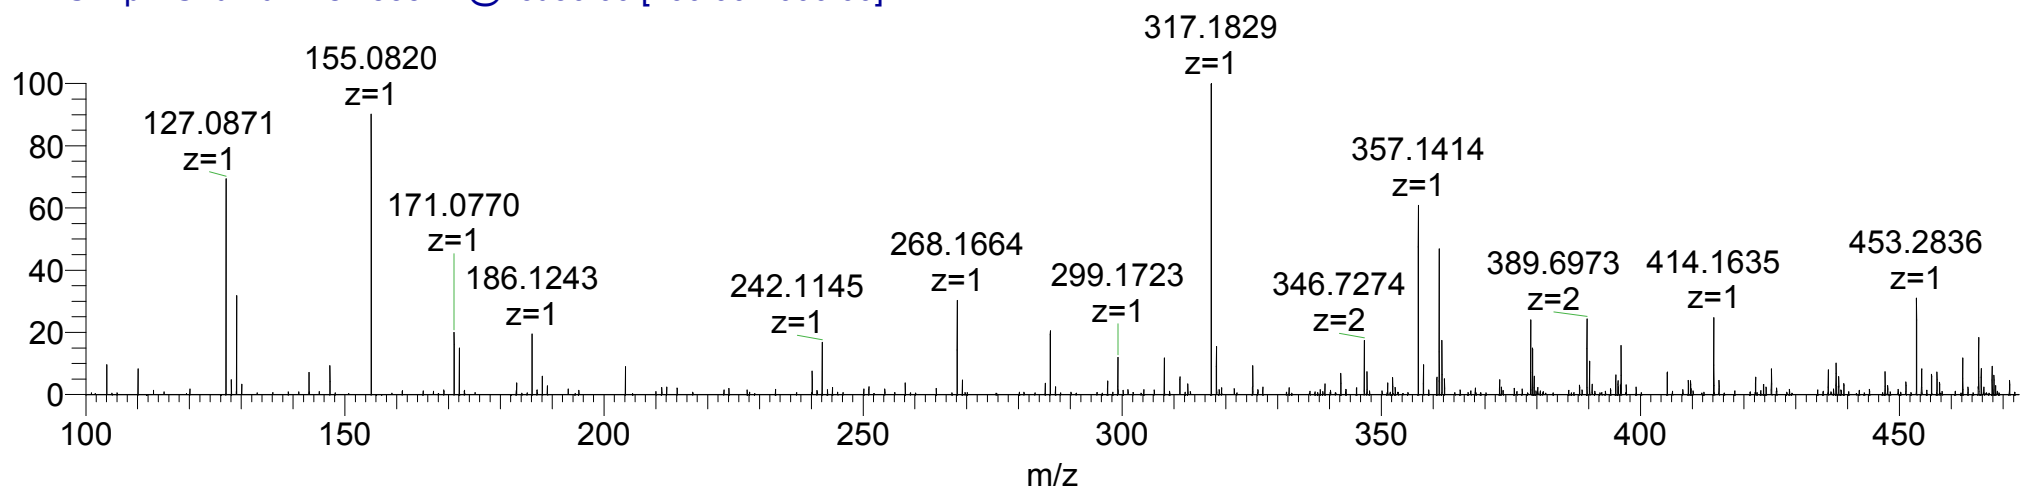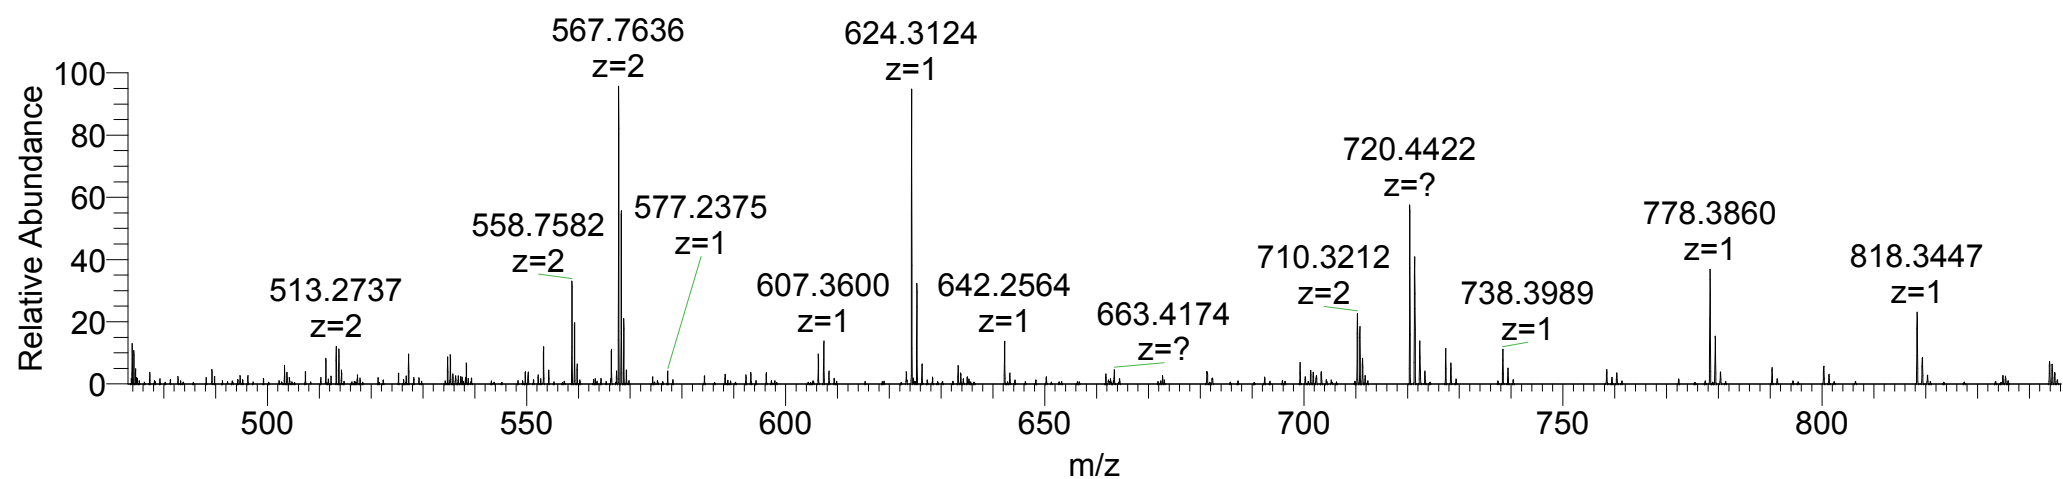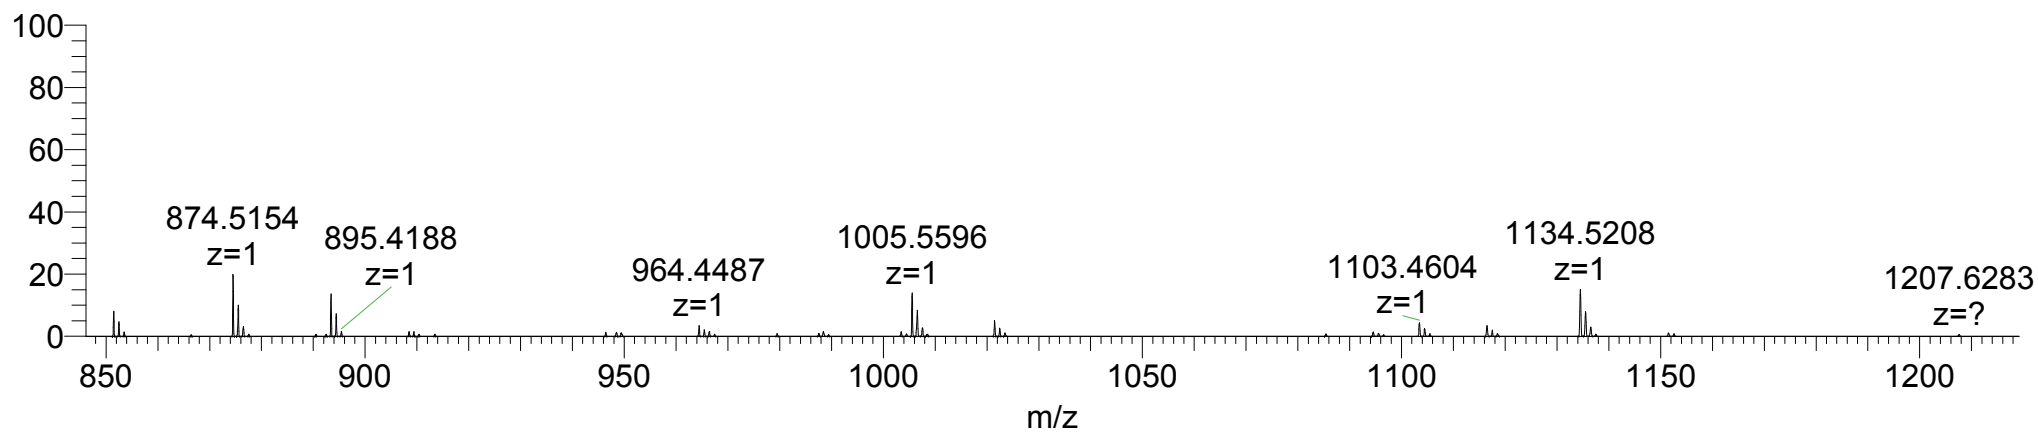

Bovine

14.

**P213-OH, K216-OH.Gal.Glc, P221-OH, P222-OH**

#210-234: EGPPGEKGGQGPPGPQGPPIGYPGPR

| Ion                | charge state | Theoretical m/z (mono) | Experimental m/z (mono) | Mass error (Da) | Mass error (PPM) |
|--------------------|--------------|------------------------|-------------------------|-----------------|------------------|
| [M+3H]+5OH+Gal.Glc | 3            | 929.7579               | 929.7585                | 0.0018          | 0.6              |
| b4+OH/PPGE+OH      | 1            | 397.1718               | 397.1738                | 0.0020          | 5.0              |
| y4+OH              | 1            | 442.2409               | 442.2436                | 0.0027          | 6.1              |
| y11+OH             | 2            | 577.8013               | 577.8051                | 0.0076          | 6.6              |
| y5+OH              | 1            | 605.3042               | 605.3092                | 0.0050          | 8.3              |
| y6+OH              | 1            | 662.3257               | 662.3297                | 0.0040          | 6.0              |
| y14+3OH            | 2            | 719.3571               | 719.3635                | 0.0128          | 8.9              |
| y15+3OH            | 2            | 747.8704               | 747.8754                | 0.0100          | 6.7              |
| y23+5OH            | 3            | 759.7013               | 759.7065                | 0.0156          | 6.8              |
| b17-H2O+4OH        | 2            | 787.3475               | 787.3522                | 0.0094          | 6.0              |
| [M+3H]+5OH         | 3            | 821.7227               | 821.7288                | 0.0183          | 7.4              |
| [M+3H]+5OH+Gal     | 3            | 867.7365               | 867.7424                | 0.0177          | 6.8              |
| y9+OH              | 1            | 929.4839               | 929.4917                | 0.0078          | 8.4              |
| y22+5OH            | 2            | 1090.5220              | 1090.5323               | 0.0206          | 9.4              |
| y11+OH             | 1            | 1154.5953              | 1154.6056               | 0.0103          | 8.9              |
| y12+OH             | 1            | 1211.6167              | 1211.6252               | 0.0085          | 7.0              |
| [M+2H]+5OH         | 2            | 1232.0804              | 1232.0878               | 0.0148          | 6.0              |
| y22+5OH+Gal.Glc    | 2            | 1252.5748              | 1252.5835               | 0.0174          | 6.9              |
| y13+2OH            | 1            | 1324.6644              | 1324.6750               | 0.0106          | 8.0              |

\*Unlocalized sites: P231-OH?, P233-OH?

Pseudolocalized sites: P231-OH

2\_2\_2012Col5a1\_Bovine\_Top5MS3 #1616 RT: 19.07 AV: 1 NL: 1.58E5

T: FTMS + p NSI d Full ms2 930.09@cid35.00 [245.00-2000.00]

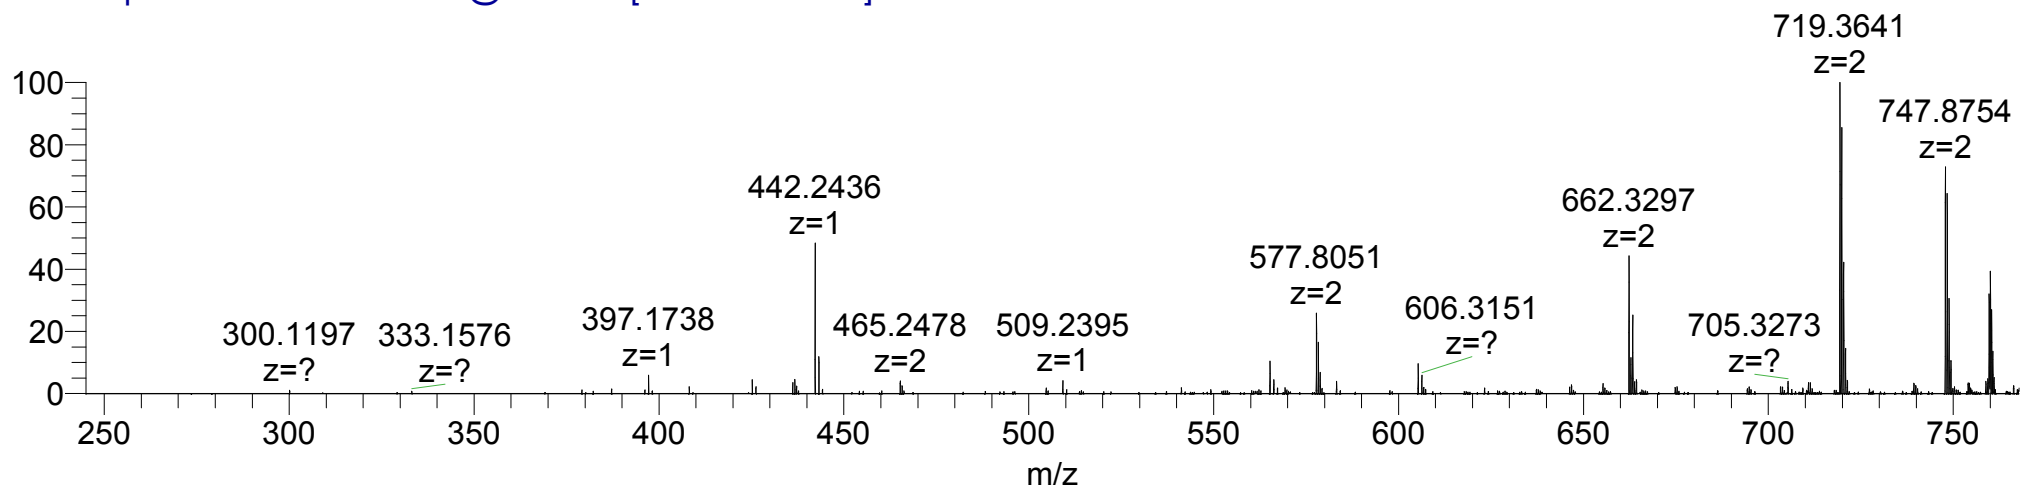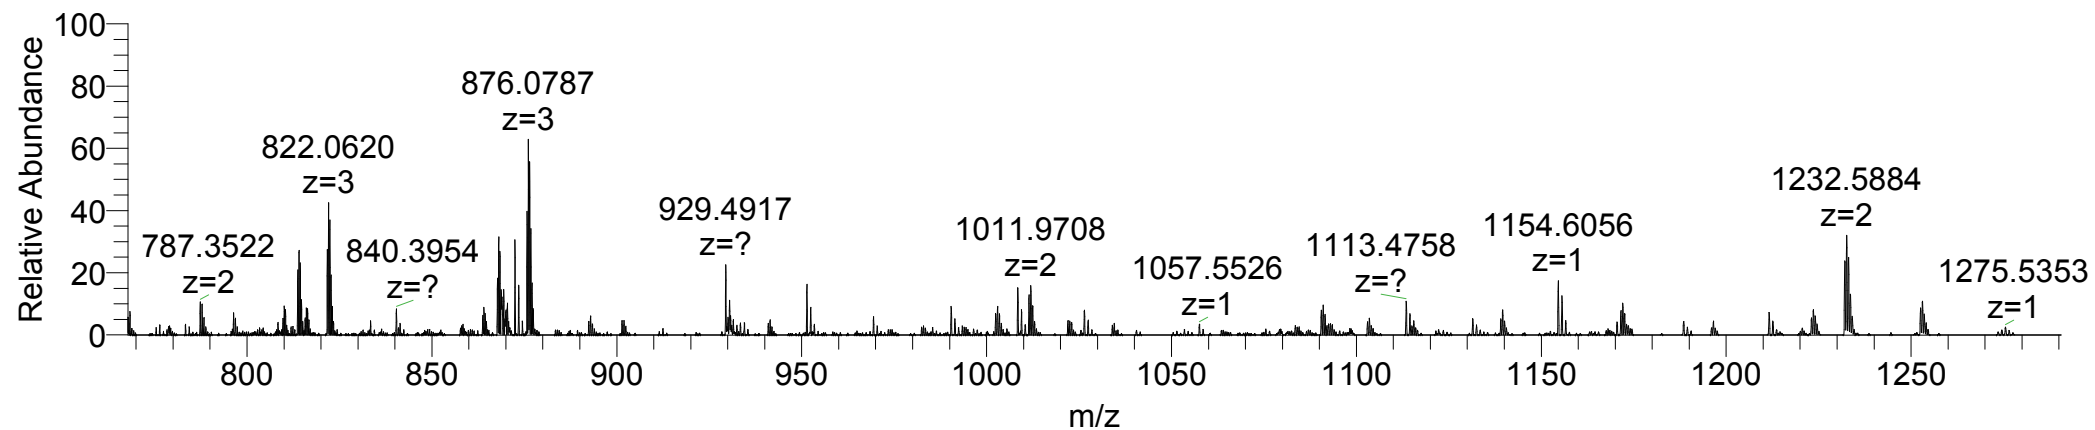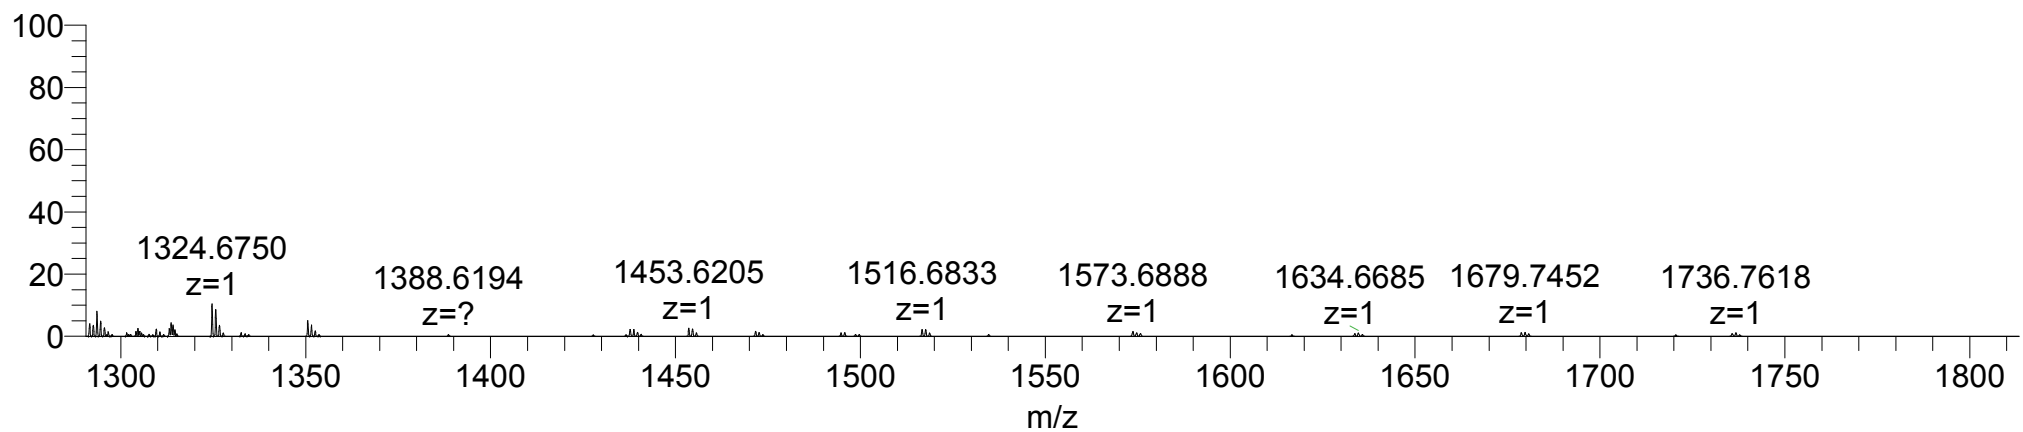

Bovine

15.

P213-OH, K216-OH.Gal.Glc, P222-OH, P231-OH

#210-234: EGPPGEKGGQGPPGPQGPIGYPGPR

| Ion                | charge state | Theoretical m/z (mono) | Experimental m/z (mono) | Mass error (Da) | Mass error (PPM) |
|--------------------|--------------|------------------------|-------------------------|-----------------|------------------|
| [M+2H]+4OH+Gal.Glc | 2            | 1386.1358              | 1386.1361               | 0.0006          | 0.2              |
| y3                 | 1            | 329.1932               | 329.1946                | 0.0014          | 4.3              |
| b4-H2O+OH          | 1            | 379.1612               | 379.1617                | 0.0005          | 1.3              |
| b4+OH              | 1            | 397.1718               | 397.1718                | 0.0000          | 0.0              |
| y4+OH              | 1            | 442.2409               | 442.2406                | -0.0003         | -0.7             |
| b5+OH              | 1            | 454.1932               | 454.1922                | -0.0010         | -2.2             |
| PPGEK+2OH          | 1            | 541.2617               | 541.2615                | -0.0002         | -0.4             |
| y5+OH              | 1            | 605.3042               | 605.3016                | -0.0026         | -4.3             |
| y6+OH              | 1            | 662.3257               | 662.3249                | -0.0008         | -1.2             |
| y14+2OH            | 2            | 711.3622               | 711.3614                | -0.0016         | -1.1             |
| b8-H2O+2OH         | 1            | 766.3366               | 766.3402                | 0.0036          | 4.7              |
| y8+OH              | 1            | 872.4625               | 872.4642                | 0.0017          | 1.9              |
| y9+OH              | 1            | 929.4839               | 929.4860                | 0.0021          | 2.3              |
| y22+4OH            | 2            | 1082.5245              | 1082.5365               | 0.0240          | 11.1             |
| y23+4OH            | 2            | 1131.0509              | 1131.0532               | 0.0046          | 2.0              |
| y12+OH             | 1            | 1211.6167              | 1211.6199               | 0.0032          | 2.6              |
| y13+2OH            | 1            | 1324.6644              | 1324.6633               | -0.0011         | -0.8             |
| y14+2OH            | 1            | 1421.7172              | 1421.7169               | -0.0003         | -0.2             |
| y15+2OH            | 1            | 1478.7387              | 1478.7388               | 0.0001          | 0.1              |
| y16+2OH            | 1            | 1606.7972              | 1606.7977               | 0.0005          | 0.3              |
| y17+2OH            | 1            | 1663.8187              | 1663.8120               | -0.0067         | -4.0             |
| y18+2OH            | 1            | 1720.8402              | 1720.8411               | 0.0009          | 0.5              |

4\_5\_2012Col5a1\_Trypsin\_nontrapping\_HCD2 #6988 RT: 53.63 AV: 1 NL: 6.15E5

T: FTMS + p NSI d Full ms2 1386.64@hcd35.00 [115.00-2000.00]

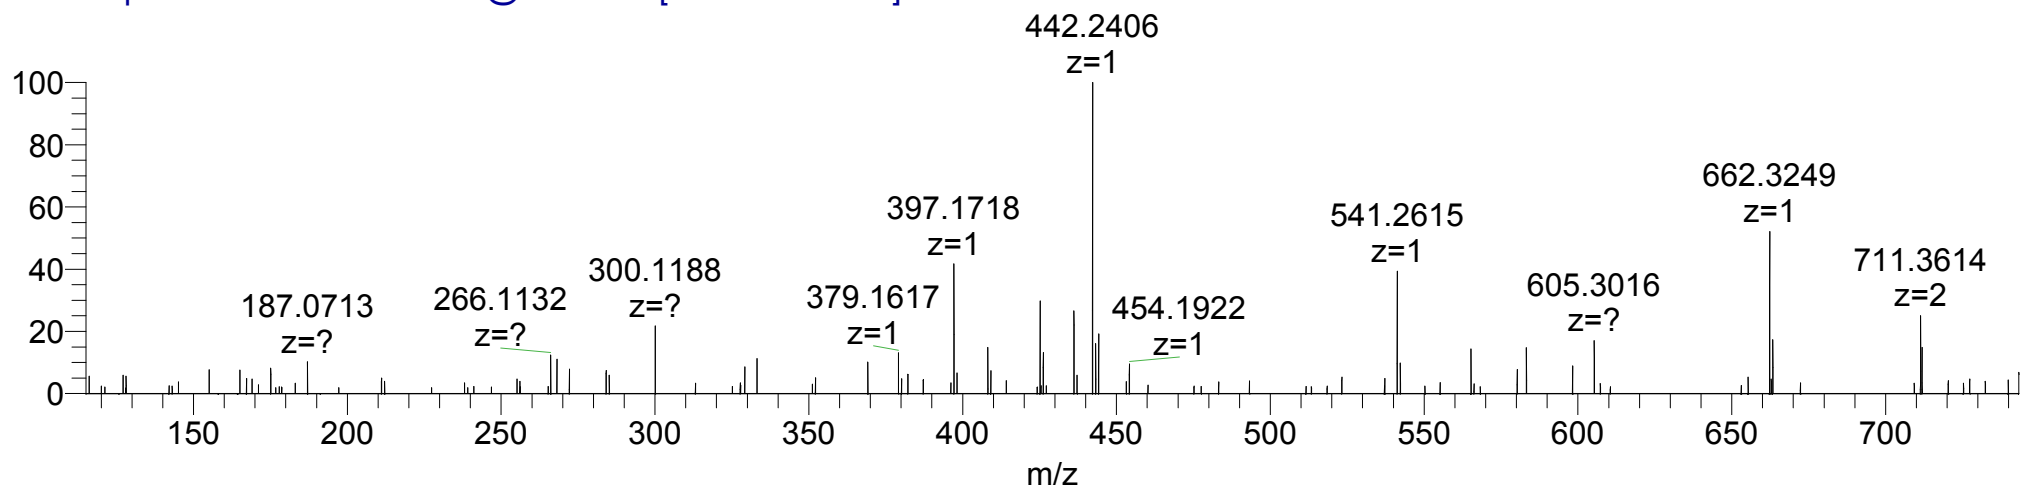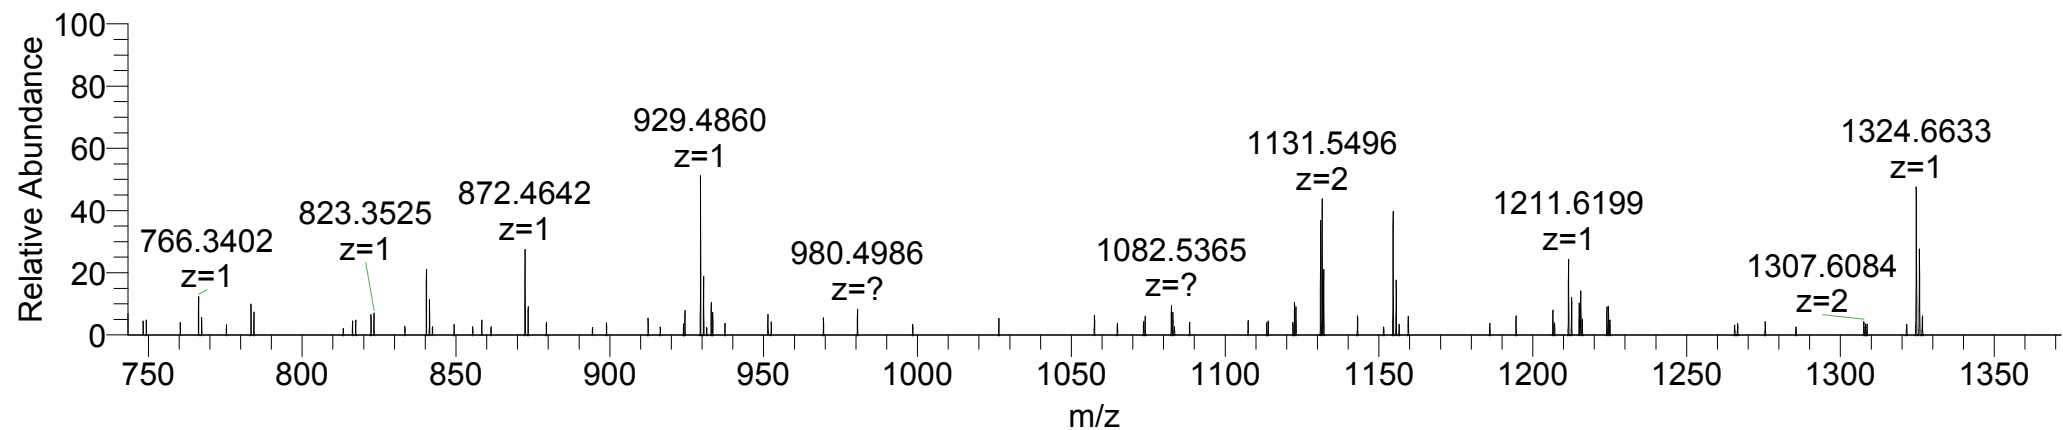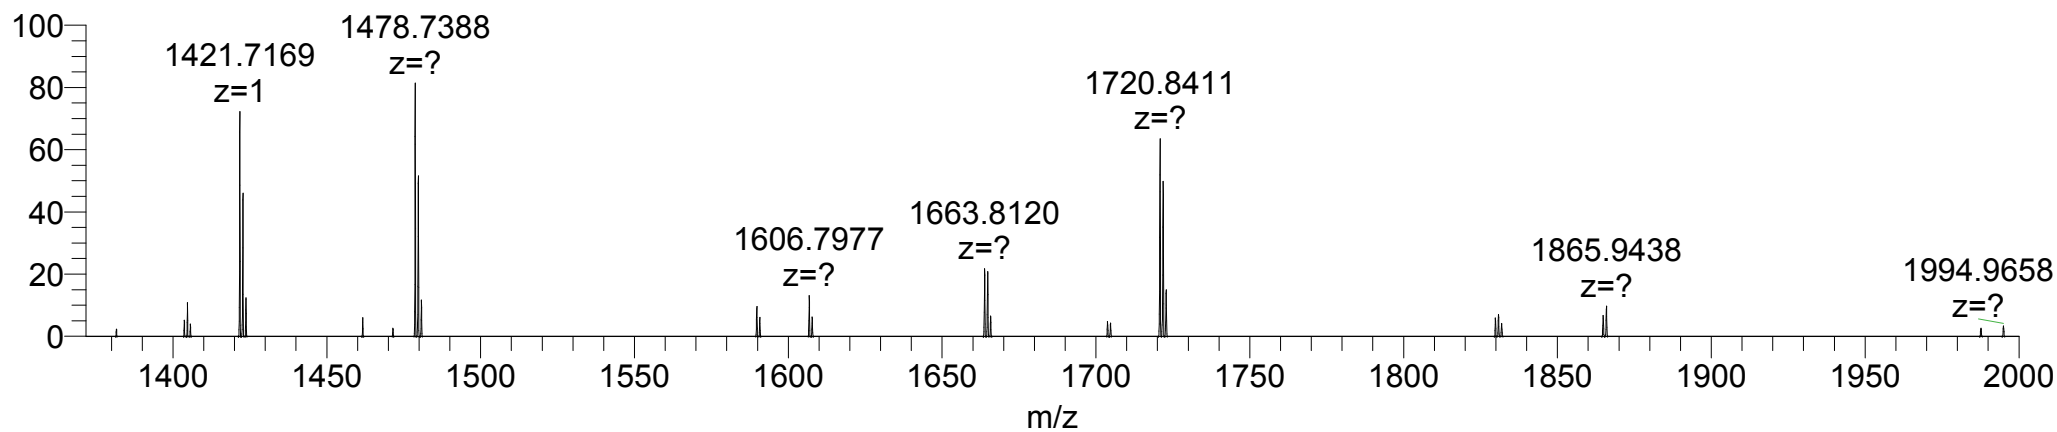



Bovine

16.

**K237-OH.Gal.Glc**

#235-243: GVKGADGIR

| Ion               | charge state | Theoretical m/z (mono) | Experimental m/z (mono) | Mass error (Da) | Mass error (PPM) |
|-------------------|--------------|------------------------|-------------------------|-----------------|------------------|
| [M+3H]+OH+Gal.Glc | 3            | 404.8700               | 404.8701                | 0.0003          | 0.2              |
| y1                | 1            | 175.1190               | 175.1193                | 0.0003          | 1.7              |
| y3                | 1            | 345.2245               | 345.2249                | 0.0004          | 1.2              |
| y7+OH             | 2            | 366.7036               | 366.7041                | 0.0010          | 1.4              |
| y4                | 1            | 460.2514               | 460.2522                | 0.0008          | 1.7              |
| y5                | 1            | 531.2885               | 531.2893                | 0.0008          | 1.5              |
| y6                | 1            | 588.3100               | 588.3109                | 0.0009          | 1.5              |
| y7-H2O-NH3+OH     | 1            | 697.3628               | 697.3646                | 0.0018          | 2.6              |
| y7+OH             | 1            | 732.3999               | 732.4008                | 0.0009          | 1.2              |
| [M+H]+OH          | 1            | 888.4898               | 888.4930                | 0.0032          | 3.6              |

4\_5\_2012Col5a1\_Trypsin\_nontrapping\_HCD2 #4527 RT: 37.93 AV: 1 NL: 1.53E6

T: FTMS + p NSI d Full ms2 404.87@hcd35.00 [115.00-1225.00]

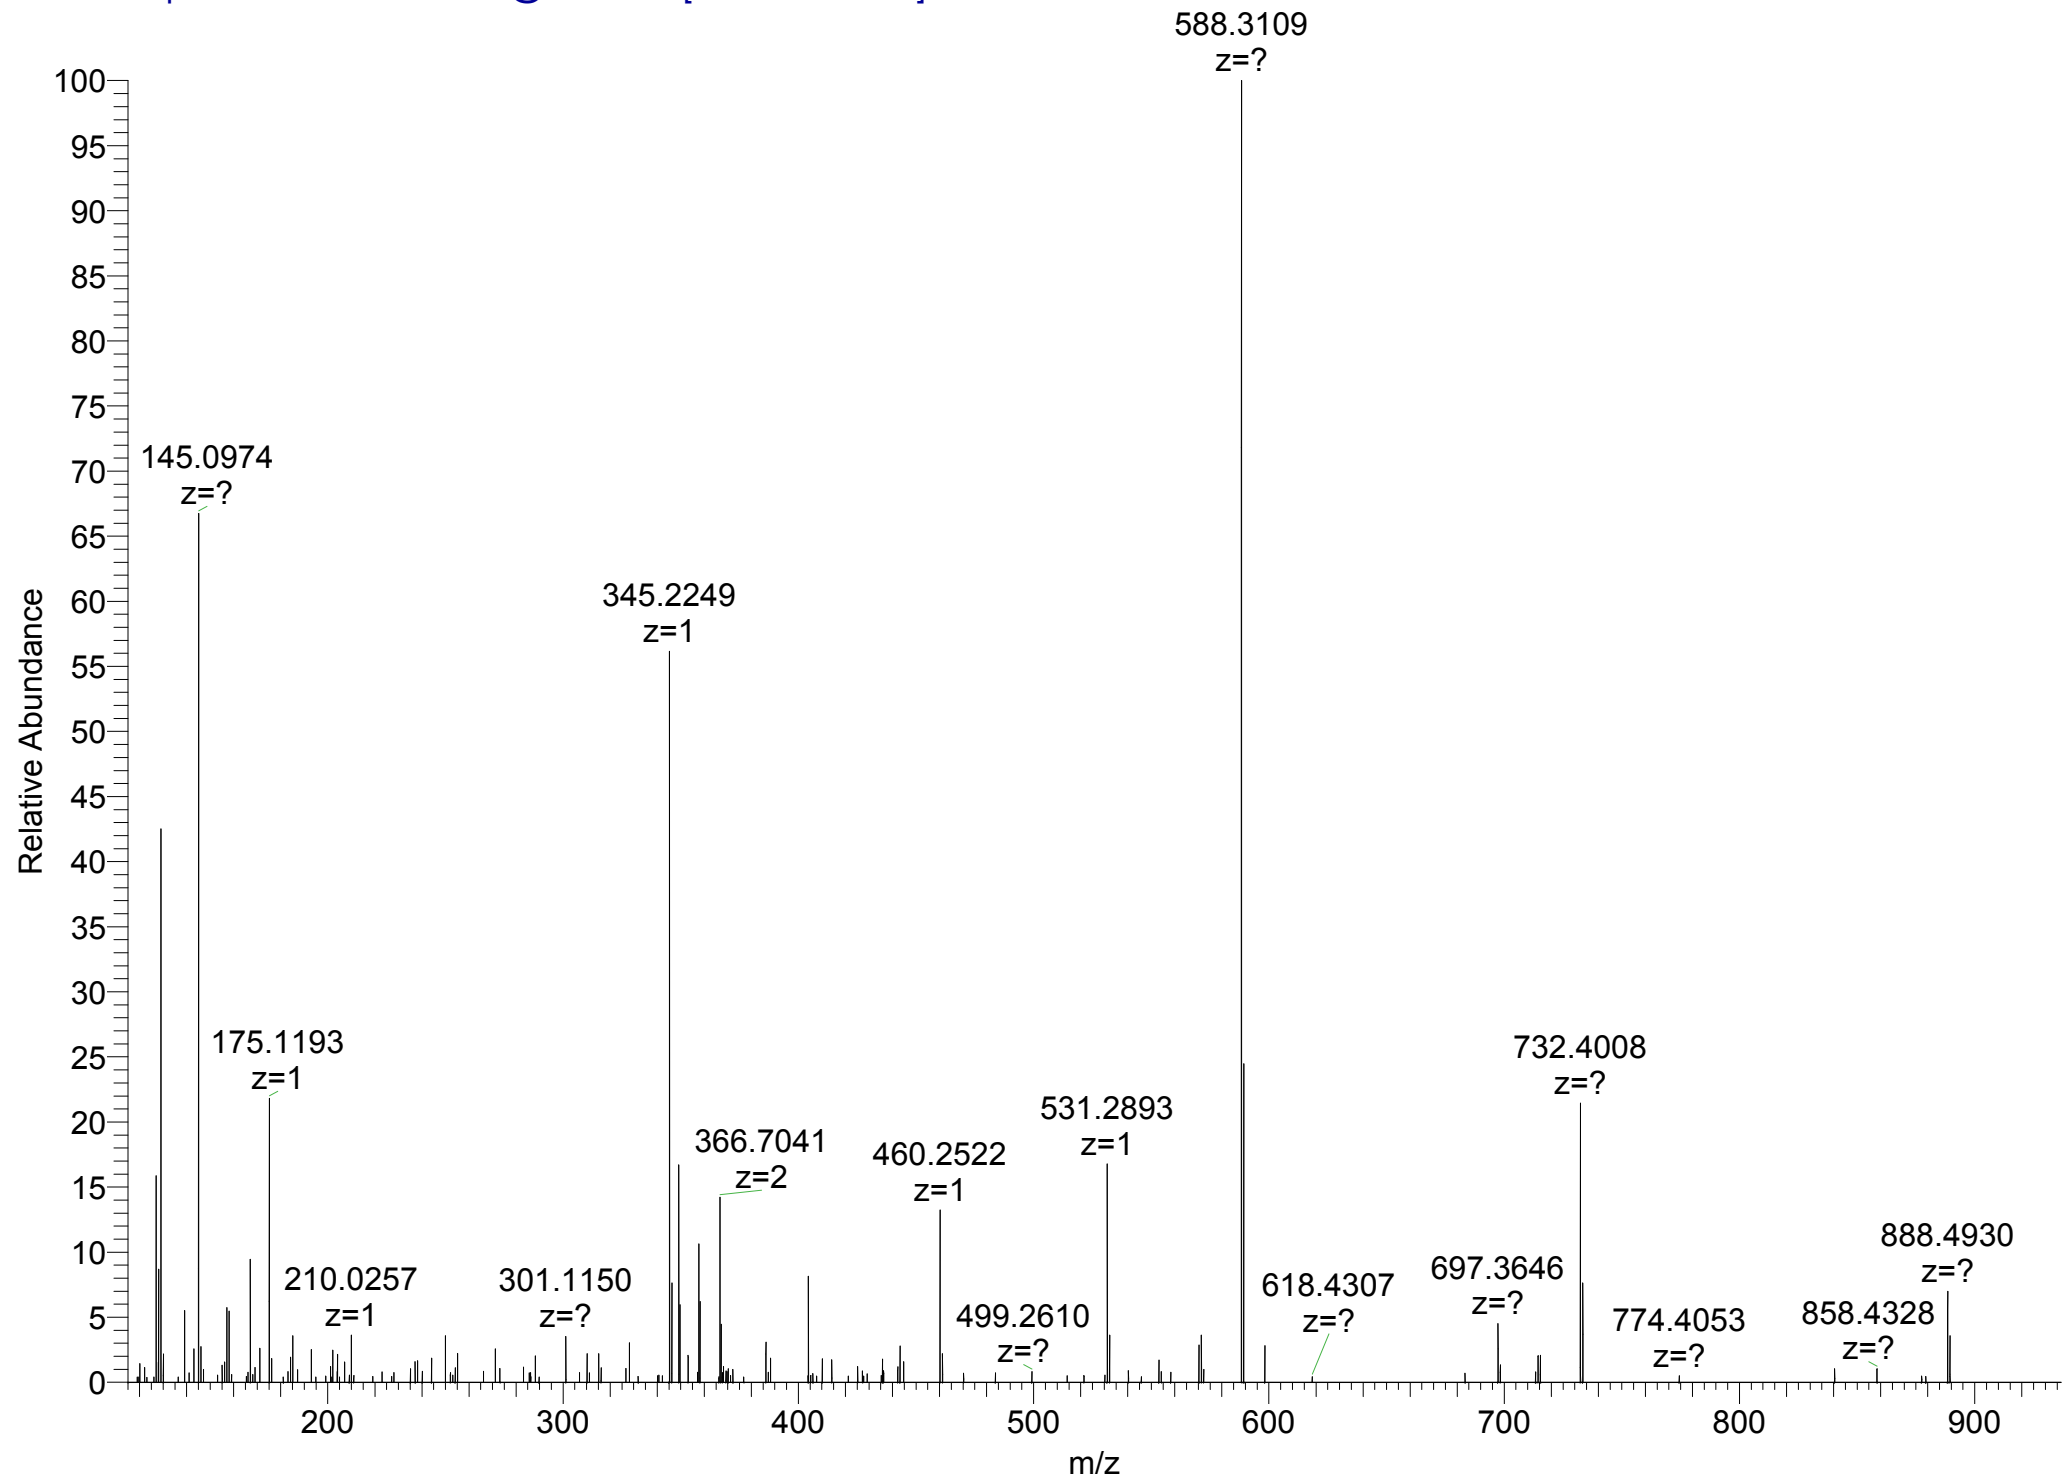

Bovine

17.

**K246-OH.Gal.Glc, K249-OH.Gal.Glc, K252-OH.Gal.Glc**

#240-254: DGIRGLKGTKGEKGE

| Ion                 | charge state | Theoretical m/z (mono) | Experimental m/z (mono) | Mass error (Da) | Mass error (PPM) |
|---------------------|--------------|------------------------|-------------------------|-----------------|------------------|
| [M+3H]+3OH+3Gal.Glc | 3            | 855.7184               | 855.7189                | 0.0015          | 0.6              |
| y2                  | 1            | 205.0819               | 205.0819                | 0.0000          | 0.0              |
| y3+OH               | 1            | 349.1718               | 349.1710                | -0.0008         | -2.3             |
| b4                  | 1            | 442.2409               | 442.2407                | -0.0002         | -0.5             |
| y5+OH               | 1            | 535.2358               | 535.2334                | -0.0024         | -4.5             |
| b6                  | 1            | 612.3464               | 612.3471                | 0.0007          | 1.1              |
| b13+2OH             | 2            | 694.8782               | 694.8776                | -0.0012         | -0.9             |
| [M+2H]+3OH          | 2            | 796.9156               | 796.9150                | -0.0012         | -0.8             |
| b9+OH               | 1            | 914.5054               | 914.5106                | 0.0052          | 5.7              |
| b10+2OH             | 1            | 1058.5953              | 1058.5951               | -0.0002         | -0.2             |
| b12+2OH             | 1            | 1244.6593              | 1244.6604               | 0.0011          | 0.9              |
| [M+H]+3OH           | 1            | 1592.8238              | 1592.8148               | -0.0090         | -5.7             |

4\_5\_2012Col5a1\_GluCandAspN\_HCD1 #454 RT: 4.14 AV: 1 NL: 3.16E6

T: FTMS + p NSI d Full ms2 856.05@hcd35.00 [115.00-2000.00]

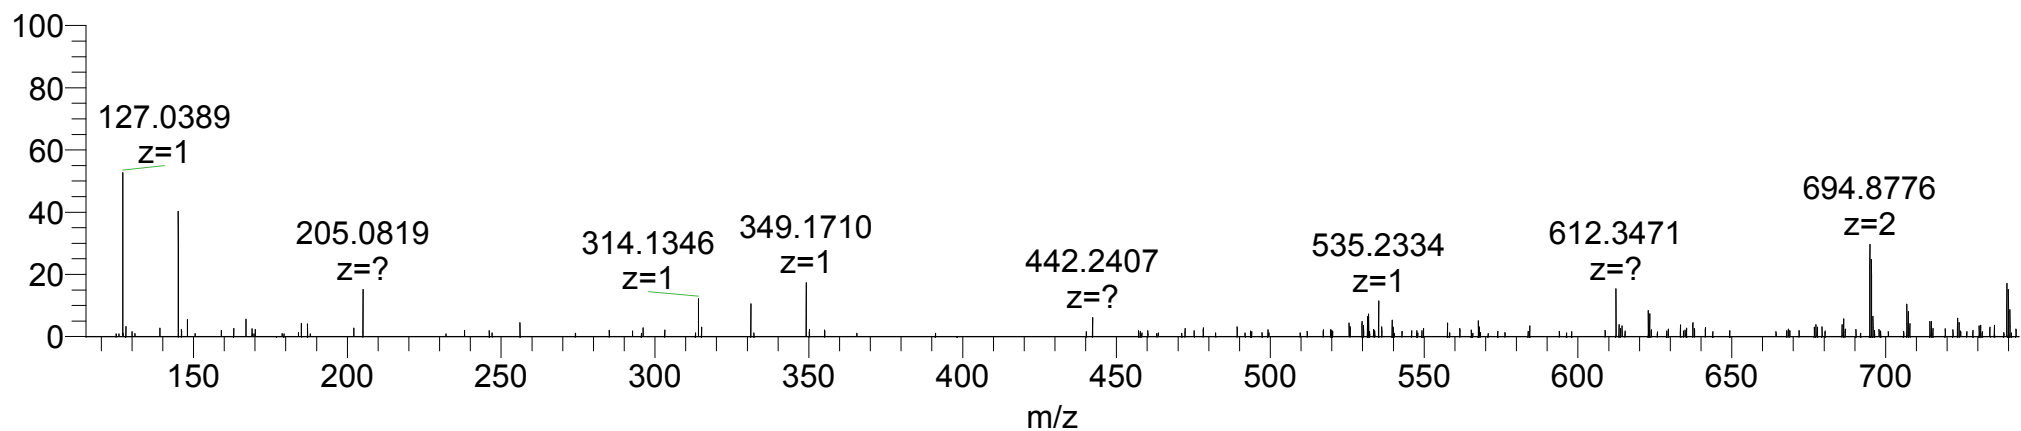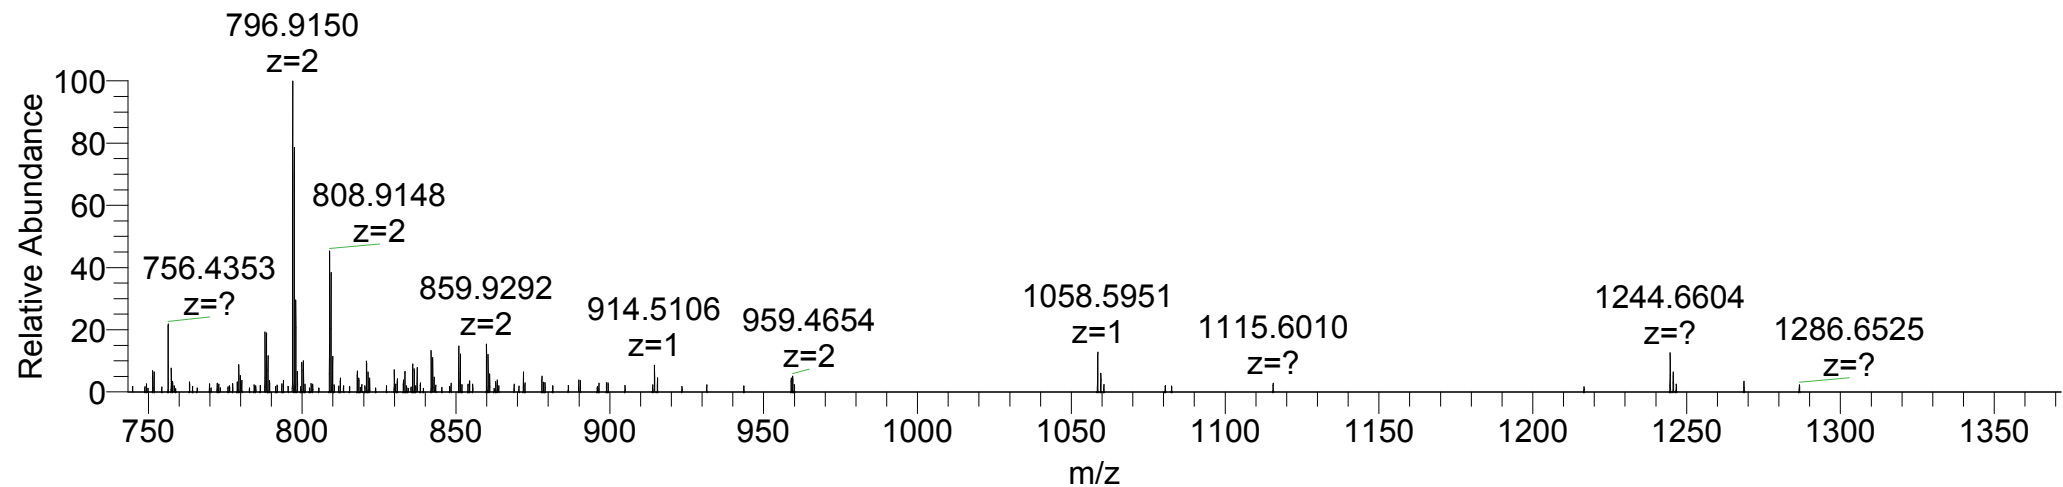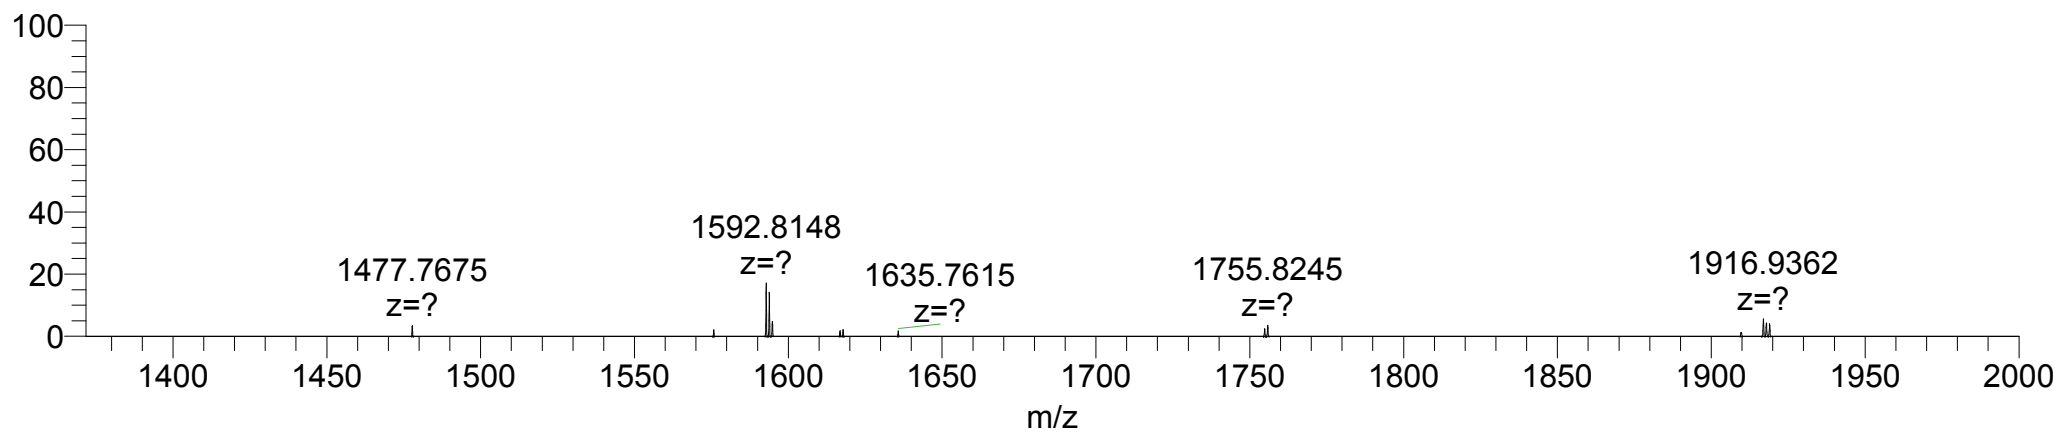

Bovine

18.

**P258-OH, K261-OH.Gal.Glc, K267-OH.Gal.Glc**

#253-270: GEDGFPGFKGDMGIKGDR

| Ion                 | charge state | Theoretical m/z (mono) | Experimental m/z (mono) | Mass error (Da) | Mass error (PPM) |
|---------------------|--------------|------------------------|-------------------------|-----------------|------------------|
| [M+3H]+3OH+2Gal.Glc | 3            | 860.3619               | 860.3636                | 0.0051          | 2.0              |
| PG+OH               | 1            | 171.0764               | 171.0764                | 0.0000          | 0.0              |
| b2                  | 1            | 187.0713               | 187.0713                | 0.0000          | 0.0              |
| y3                  | 1            | 347.1674               | 347.1683                | 0.0009          | 2.6              |
| IKGP+OH             | 1            | 430.2269               | 430.2296                | 0.0027          | 6.3              |
| a5                  | 1            | 478.1932               | 478.1928                | -0.0004         | -0.8             |
| y4+OH               | 1            | 491.2572               | 491.2575                | 0.0003          | 0.6              |
| y13-H2O+3OH         | 2            | 704.3379               | 704.3387                | 0.0016          | 1.1              |
| y13+3OH             | 2            | 713.3432               | 713.3428                | -0.0008         | -0.6             |
| y7+OH               | 1            | 792.4032               | 792.4029                | -0.0003         | -0.4             |
| y15+3OH             | 2            | 815.3881               | 815.3851                | -0.0060         | -3.7             |
| y9+OH               | 1            | 964.4517               | 964.4517                | 0.0000          | 0.0              |
| y10+2OH             | 1            | 1108.5415              | 1108.5426               | 0.0011          | 1.0              |
| y12+2OH             | 1            | 1312.6314              | 1312.6266               | -0.0048         | -3.7             |
| y13+3OH             | 1            | 1425.6791              | 1425.6794               | 0.0003          | 0.2              |

4\_5\_2012Col5a1\_Trypsin\_nontrapping\_HCD1 #8788 RT: 63.51 AV: 1 NL: 1.91E4

T: FTMS + p NSI d Full ms2 860.70@hcd35.00 [115.00-2000.00]

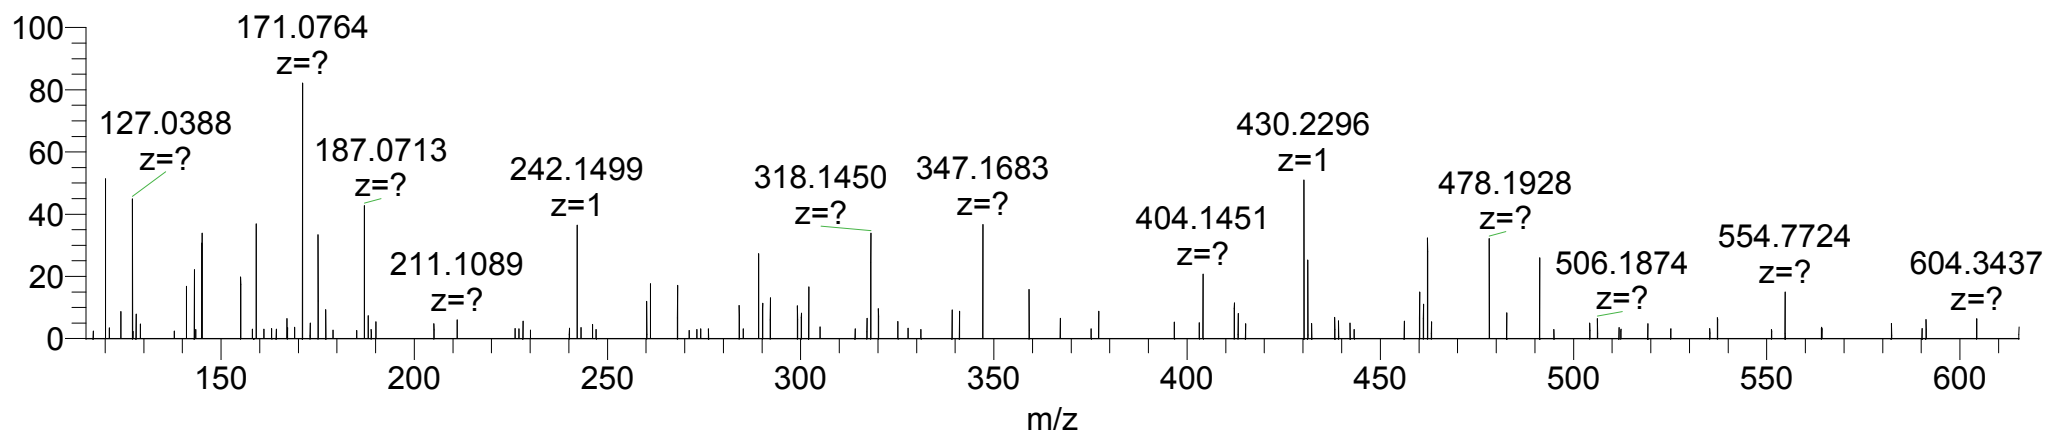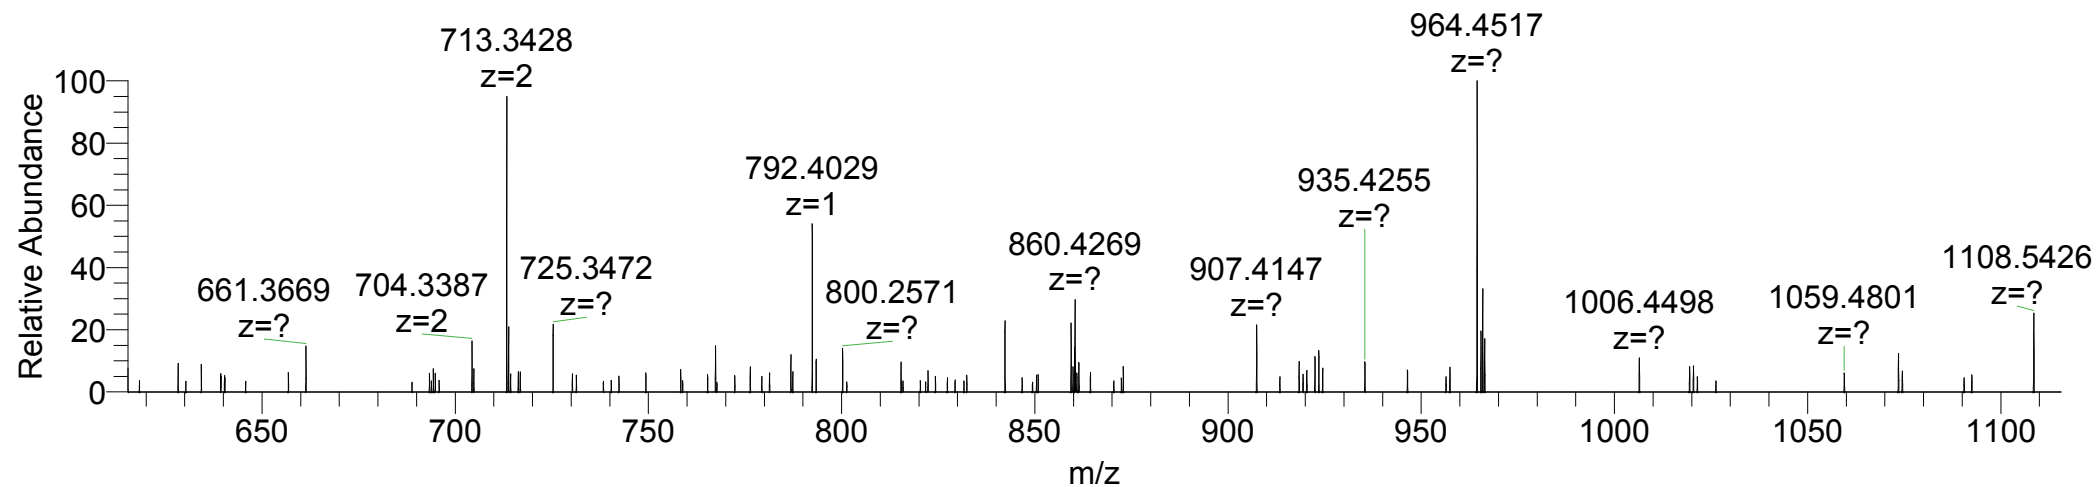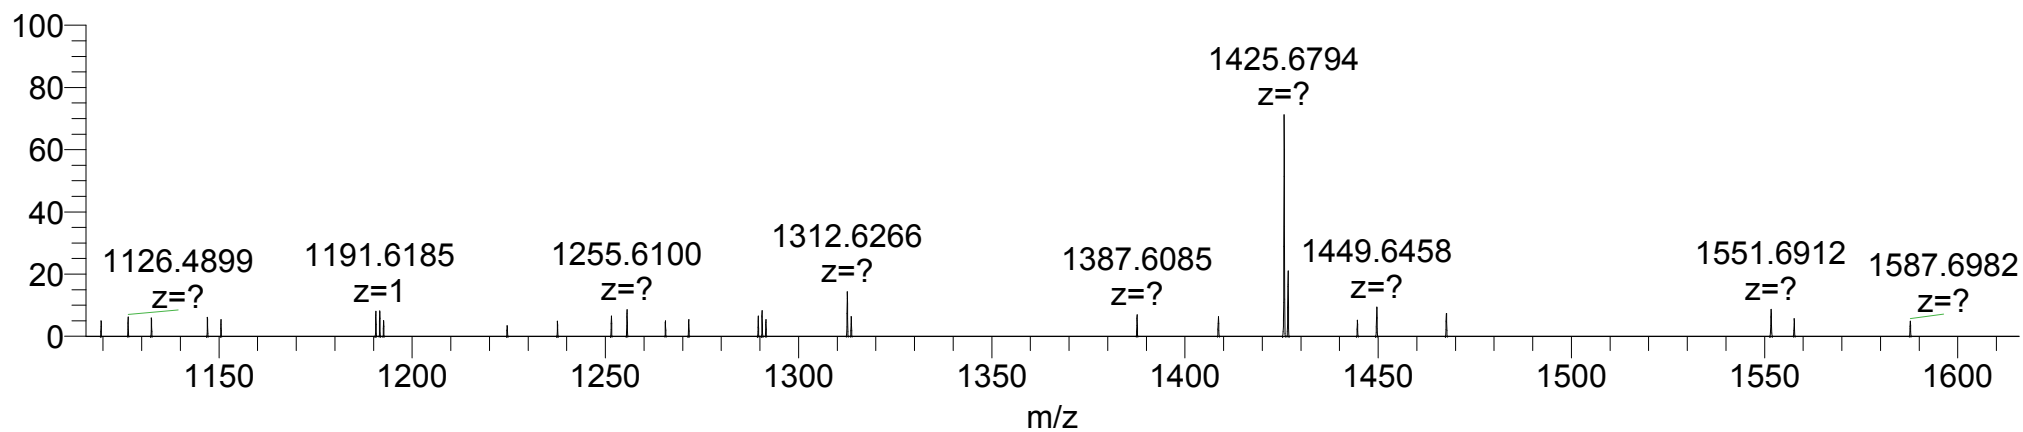

Bovine

19.

**P275-OH, P276-OH**

#271-279: GEIGPPGPR

MS<sup>2</sup>: GEIGPGPR

| Ion                      | charge state | Theoretical m/z (mono) | Experimental m/z (mono) | Mass error (Da) | Mass error (PPM) |
|--------------------------|--------------|------------------------|-------------------------|-----------------|------------------|
| [M+2H]+2OH               | 2            | 456.2327               | 456.2346                | 0.0038          | 4.2              |
| a2                       | 1            | 159.0764               | 159.0771                | 0.0007          | 4.4              |
| b2                       | 1            | 187.0713               | 187.0721                | 0.0008          | 4.3              |
| y5+2OH(MS <sup>3</sup> ) | 2            | 278.1479               | 278.1490                | 0.0022          | 4.0              |
| b3/EIG                   | 1            | 300.1554               | 300.1564                | 0.0010          | 3.3              |
| b4                       | 1            | 357.1769               | 357.1785                | 0.0016          | 4.5              |
| y7+2OH                   | 2            | 363.2007               | 363.2023                | 0.0032          | 4.4              |
| y4+OH                    | 1            | 442.2409               | 442.2425                | 0.0016          | 3.6              |
| y5+2OH                   | 1            | 555.2885               | 555.2906                | 0.0021          | 3.8              |
| y6+2OH                   | 1            | 612.3100               | 612.3115                | 0.0015          | 2.4              |
| y7+2OH                   | 1            | 725.3941               | 725.3964                | 0.0023          | 3.2              |

MS<sup>3</sup>: PPGPR

| Ion        | charge state | Theoretical m/z (mono) | Experimental m/z (mono) | Mass error (Da) | Mass error (PPM) |
|------------|--------------|------------------------|-------------------------|-----------------|------------------|
| y4+OH      | 2            | 221.6241               | 221.6241                | 0.0000          | 0.0              |
| [M+2H]+2OH | 2            | 278.1479               | 278.1480                | 0.0002          | 0.4              |
| y3         | 1            | 329.1932               | 329.1933                | 0.0001          | 0.3              |
| y4-NH3+OH  | 1            | 425.2143               | 425.2141                | -0.0002         | -0.5             |
| y4+OH      | 1            | 442.2409               | 442.2409                | 0.0000          | 0.0              |

2\_2\_2012Col5a1\_Bovine\_Top5MS3\_2 #760 RT: 9.57 AV: 1 NL: 4.18E5

T: FTMS + p NSI d Full ms2 456.23@cid35.00 [115.00-925.00]

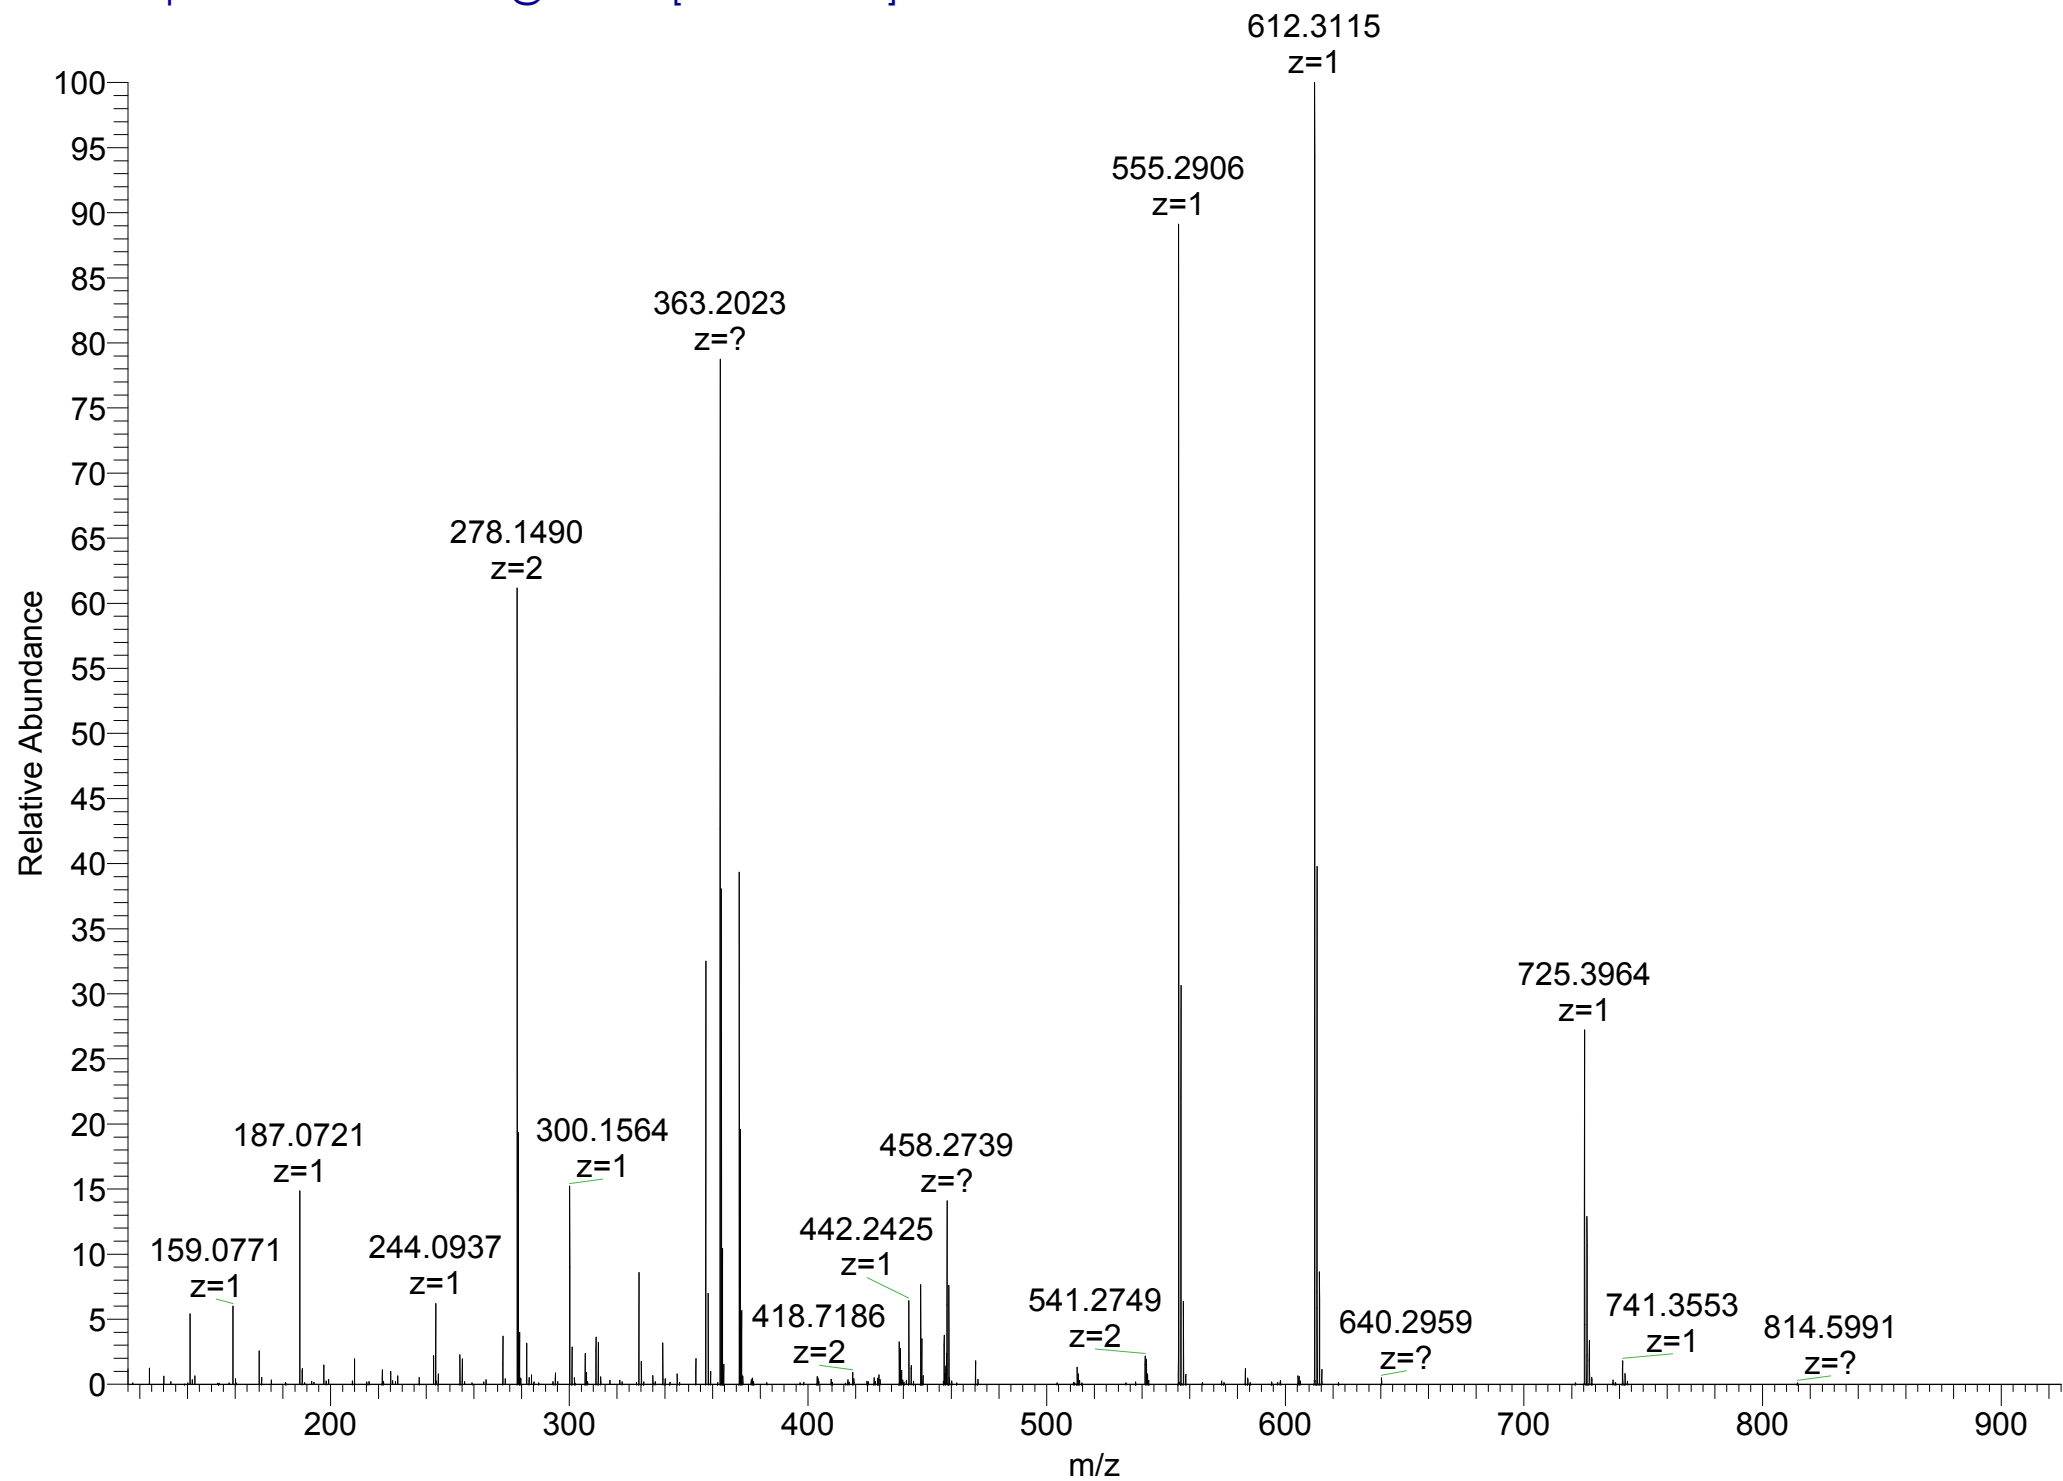



2\_2\_2012Col5a1\_Bovine\_Top5MS3\_2 #761 RT: 9.58 AV: 1 NL: 1.35E5

T: FTMS + p NSI d Full ms3 456.23@cid35.00 278.15@hcd30.00 [100.00-570.00]

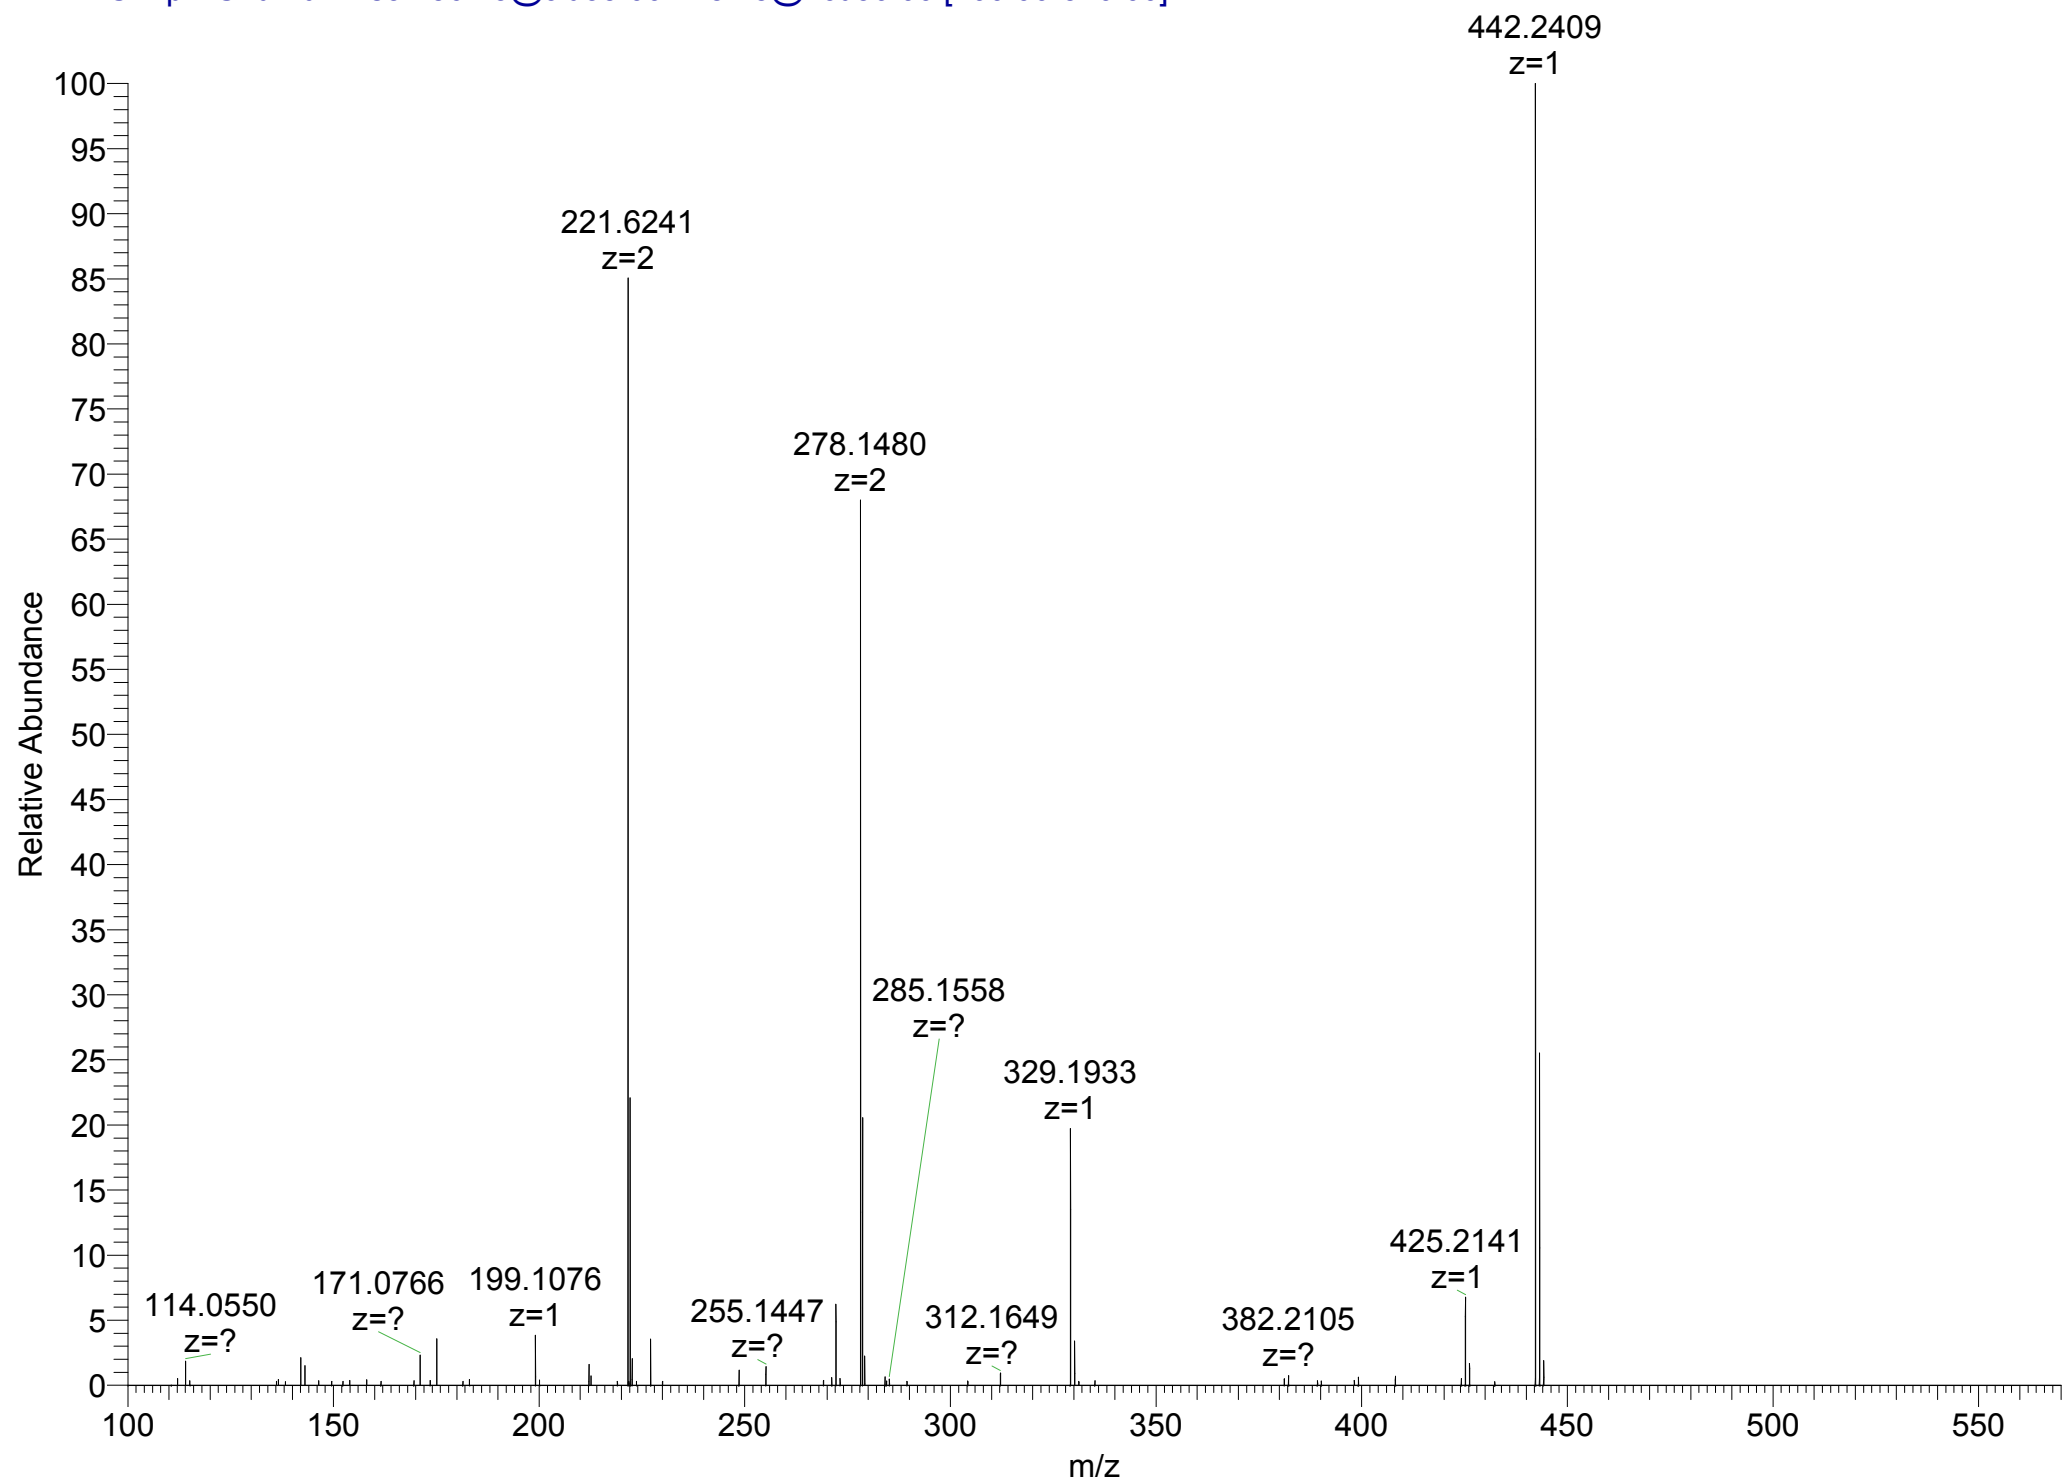

Bovine

20.

K288-OH.Gal.Glc

#280-290: GEDGPEGPKGR

| Ion               | charge state | Theoretical m/z (mono) | Experimental m/z (mono) | Mass error (Da) | Mass error (PPM) |
|-------------------|--------------|------------------------|-------------------------|-----------------|------------------|
| [M+3H]+OH+Gal.Glc | 3            | 480.2108               | 480.2114                | 0.0018          | 1.3              |
| a2/EG-28          | 1            | 159.0764               | 159.0761                | -0.0003         | -1.9             |
| b2/EG             | 1            | 187.0713               | 187.0711                | -0.0002         | -1.1             |
| y2                | 1            | 232.1404               | 232.1400                | -0.0004         | -1.7             |
| EGP               | 1            | 284.1241               | 284.1241                | 0.0000          | 0.0              |
| y7+OH             | 2            | 378.7036               | 378.7028                | -0.0016         | -2.1             |
| y8+OH             | 2            | 407.2143               | 407.2142                | -0.0002         | -0.2             |
| y9+OH             | 2            | 464.7278               | 464.7283                | 0.0010          | 1.1              |
| y4+OH             | 1            | 473.2831               | 473.2830                | -0.0001         | -0.2             |
| y5-NH3+OH         | 1            | 513.2780               | 513.2787                | 0.0007          | 1.4              |
| y5+OH             | 1            | 530.3045               | 530.3040                | -0.0005         | -0.9             |
| [M+2H]+OH         | 2            | 557.7598               | 557.7560                | -0.0076         | -6.8             |
| y6-H2O+OH         | 1            | 641.3365               | 641.3375                | 0.0010          | 1.6              |
| y6+OH             | 1            | 659.3471               | 659.3453                | -0.0018         | -2.7             |
| y7+OH             | 1            | 756.3999               | 756.3991                | -0.0008         | -1.1             |
| y8+OH             | 1            | 813.4213               | 813.4201                | -0.0012         | -1.5             |
| y9+OH             | 1            | 928.4483               | 928.4481                | -0.0002         | -0.2             |

4\_5\_2012Col5a1\_Trypsin\_nontrapping\_HCD2 #256 RT: 2.65 AV: 1 NL: 7.38E3

T: FTMS + p NSI d Full ms2 480.21@hcd35.00 [115.00-1455.00]

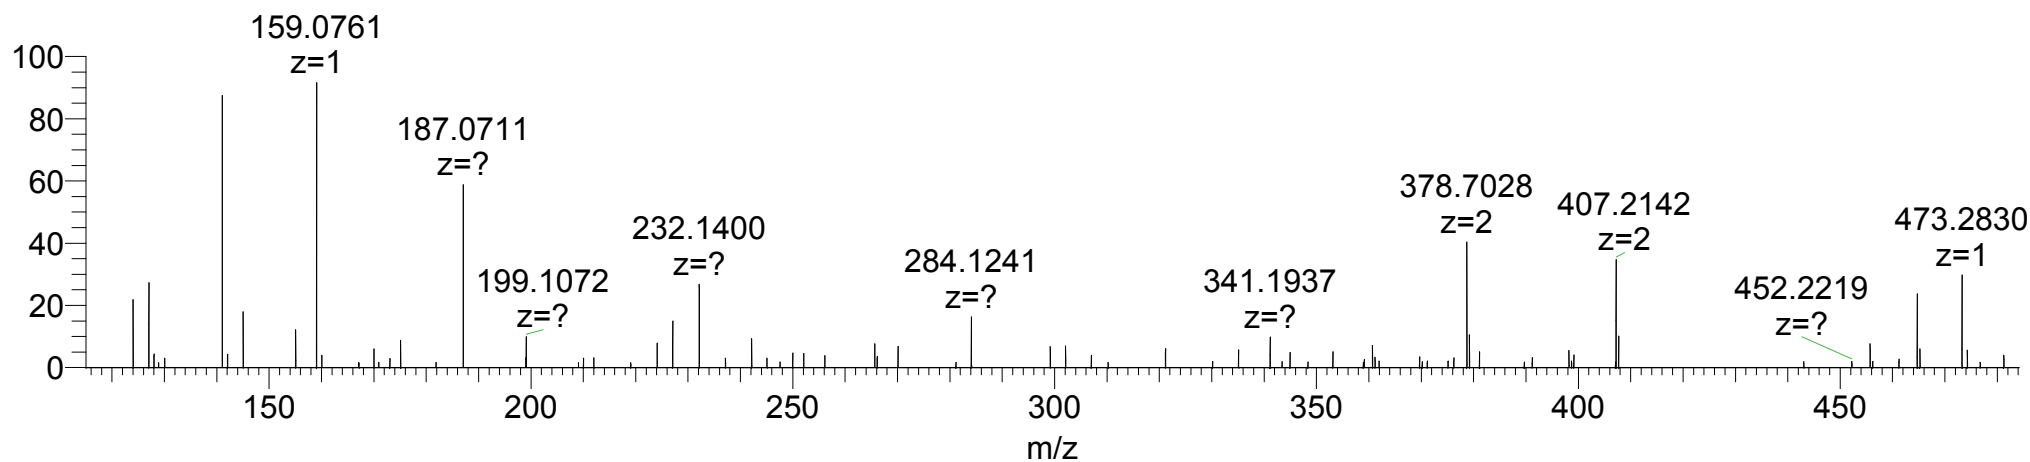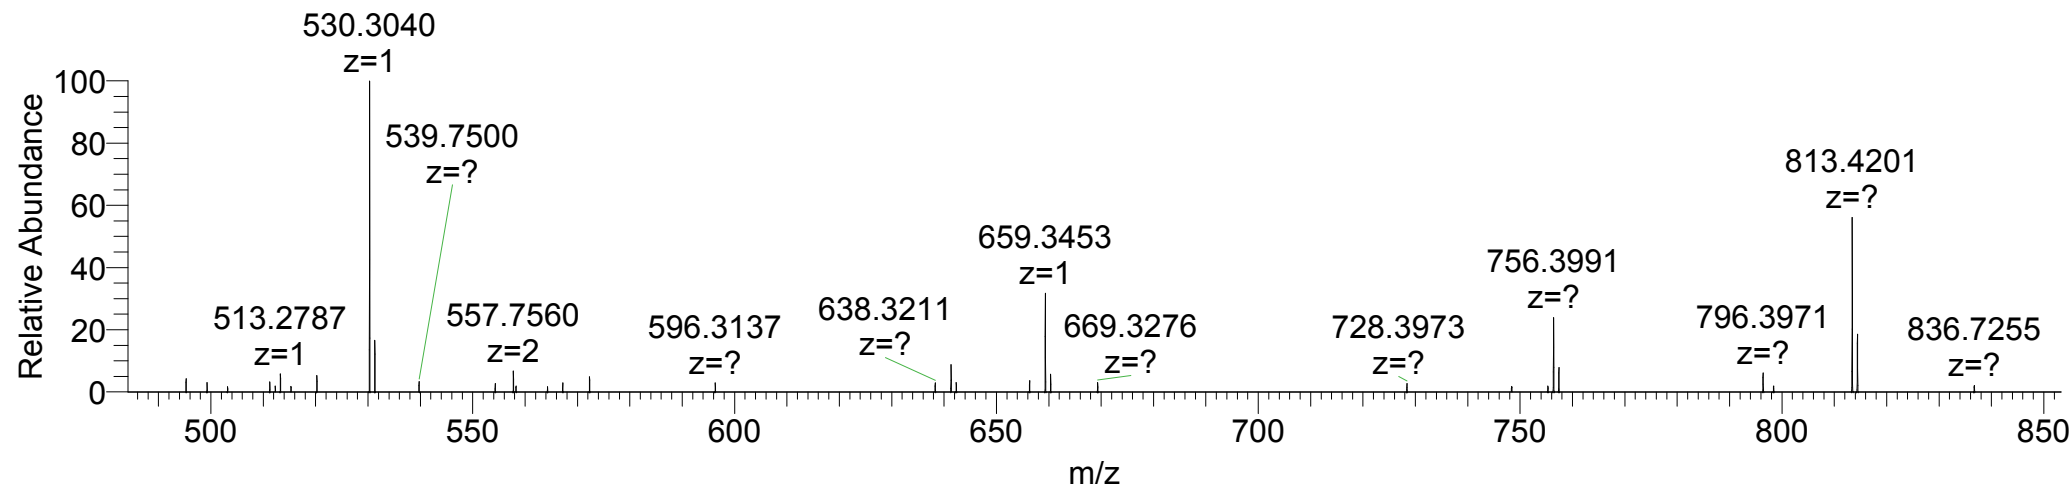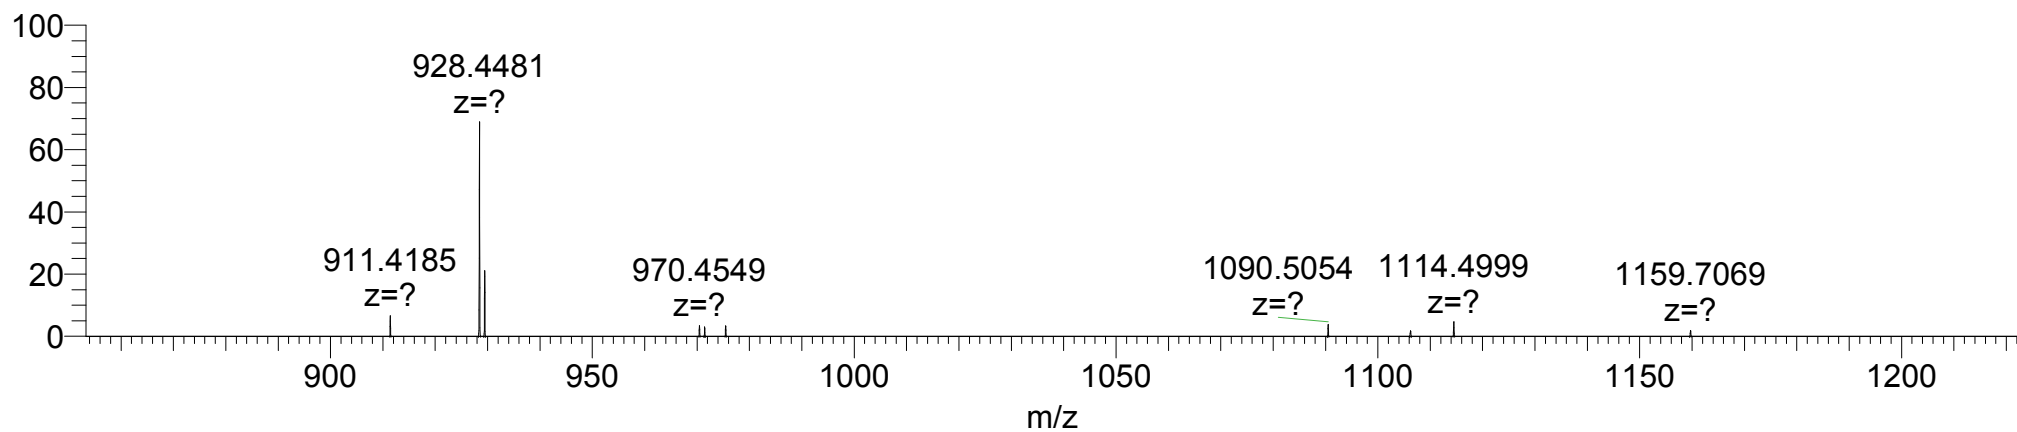

Bovine

21.

**P297-OH, P303-OH, K306-OH.Gal.Glc**

#291-308: GGPNGDPGPLGPPGEKGK

| Ion                | charge state | Theoretical m/z (mono) | Experimental m/z (mono) | Mass error (Da) | Mass error (PPM) |
|--------------------|--------------|------------------------|-------------------------|-----------------|------------------|
| [M+2H]+3OH+Gal.Glc | 2            | 1001.9580              | 1001.9548               | -0.0064         | -3.2             |
| y2                 | 1            | 204.1343               | 204.1338                | -0.0005         | -2.5             |
| PNGD               | 1            | 384.1514               | 384.1503                | -0.0011         | -2.9             |
| b6                 | 1            | 498.1943               | 498.1937                | -0.0006         | -1.2             |
| y12+3OH            | 2            | 591.3117               | 591.3107                | -0.0020         | -1.7             |
| y6+2OH             | 1            | 647.3359               | 647.3360                | 0.0001          | 0.2              |
| b8+OH              | 1            | 668.2634               | 668.2620                | -0.0014         | -2.1             |
| y8+2OH             | 1            | 801.4101               | 801.4095                | -0.0006         | -0.7             |
| [M+2H]+3OH         | 2            | 839.9052               | 839.9035                | -0.0034         | -2.0             |
| [M+2H]+3OH+Gal     | 2            | 920.9316               | 920.9302                | -0.0028         | -1.5             |
| [M+2H]+3OH+Gal.Glc | 2            | 1001.9580              | 1001.9573               | -0.0014         | -0.7             |
| y12+3OH            | 1            | 1181.6161              | 1181.6157               | -0.0004         | -0.3             |
| y12+3OH+Gal.Glc    | 1            | 1505.7217              | 1505.7201               | -0.0016         | -1.1             |
| [M+H]+3OH          | 1            | 1678.8031              | 1678.8025               | -0.0006         | -0.4             |

2\_25\_2012Col5a1\_Bovine\_Trypsin\_nonrrapping\_1 #2698 RT: 29.81 AV: 1 NL: 7.63E6

T: FTMS + p NSI d Full ms2 1001.95@hcd30.00 [100.00-2000.00]

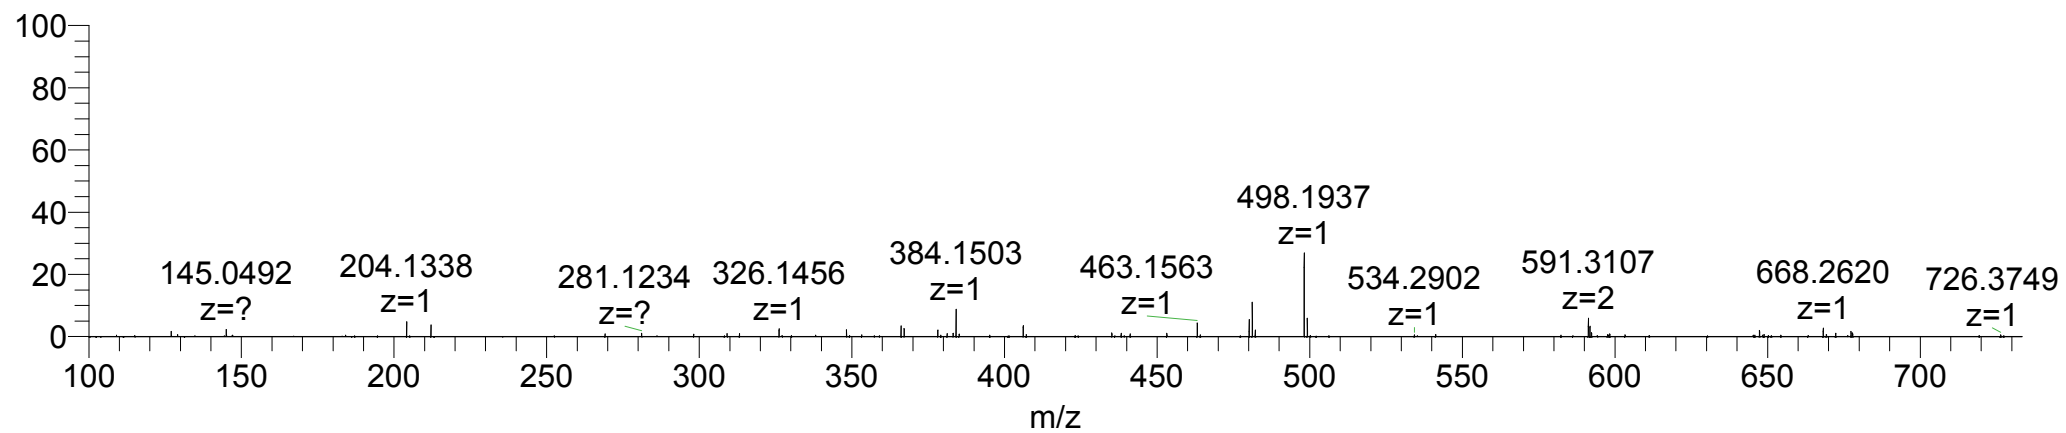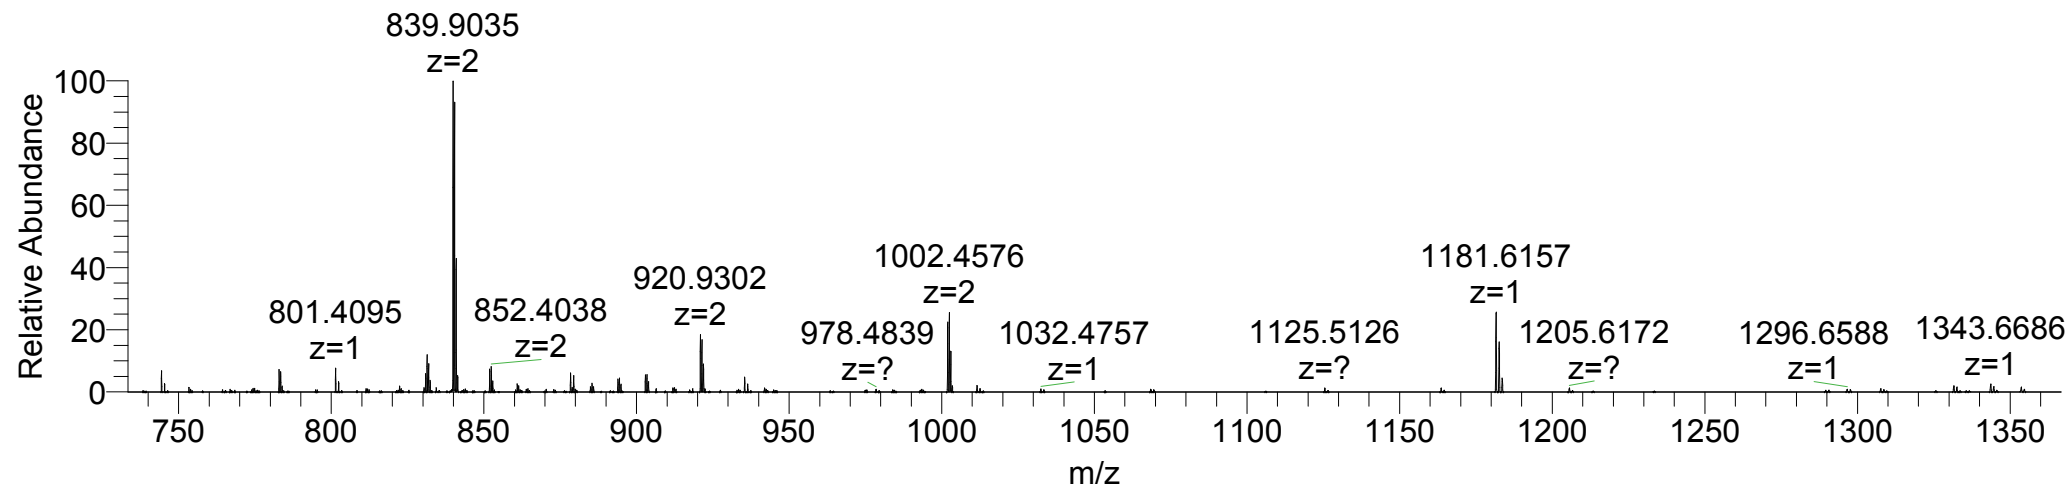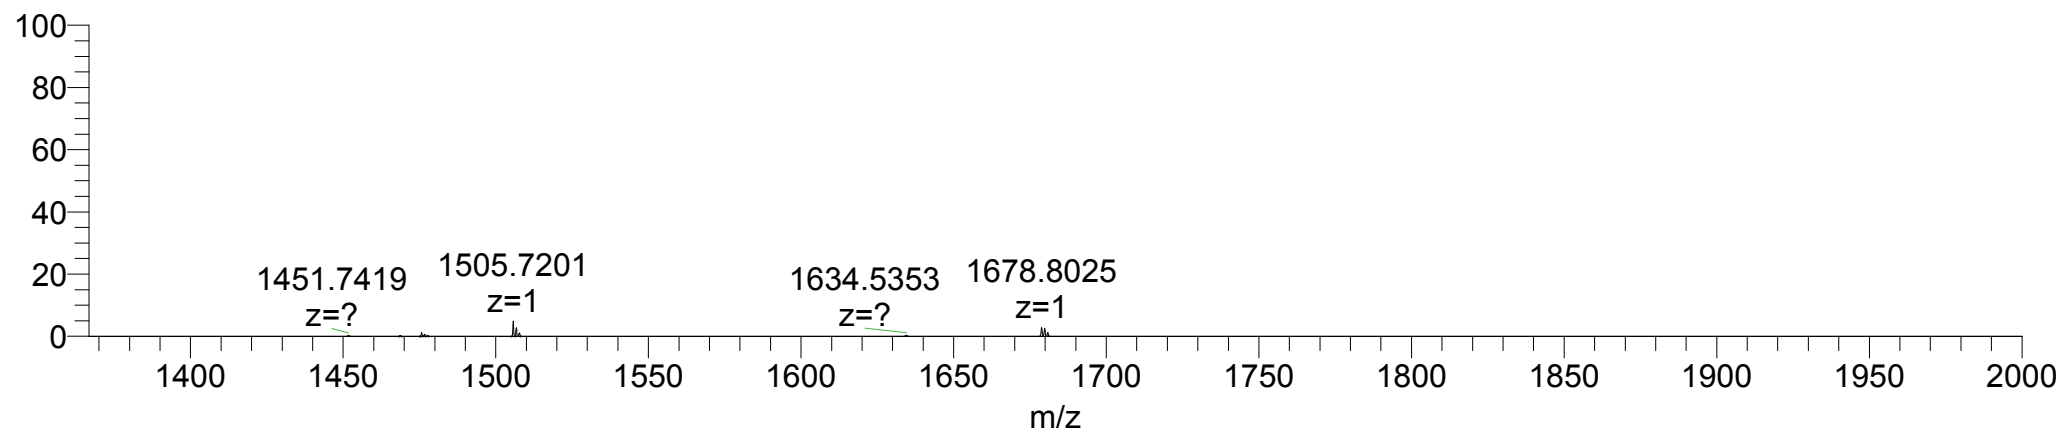

Bovine

**22.**

**P312-OH, P315-OH, P318-OH**

#309-320: LGVPGLPGYPGR

| Ion        | charge state | Theoretical m/z (mono) | Experimental m/z (mono) | Mass error (Da) | Mass error (PPM) |
|------------|--------------|------------------------|-------------------------|-----------------|------------------|
| [M+2H]+2OH | 2            | 615.8275               | 615.8331                | 0.0112          | 9.1              |
| PG+OH      | 1            | 171.0764               | 171.0768                | 0.0004          | 2.4              |
| PGL+OH     | 1            | 284.1605               | 284.1609                | 0.0004          | 1.4              |
| y6+2OH     | 2            | 339.6639               | 339.6644                | 0.0010          | 1.5              |
| y3+OH      | 1            | 345.1881               | 345.1891                | 0.0010          | 2.9              |
| y9+3OH     | 2            | 481.2405               | 481.2409                | 0.0008          | 0.8              |
| a6         | 1            | 525.3395               | 525.3401                | 0.0006          | 1.1              |
| y5+OH      | 1            | 565.2729               | 565.2730                | 0.0001          | 0.2              |
| y6+2OH     | 1            | 678.3206               | 678.3214                | 0.0008          | 1.2              |
| y7+2OH     | 1            | 791.4046               | 791.4070                | 0.0024          | 3.0              |
| y8+2OH     | 1            | 848.4261               | 848.4278                | 0.0017          | 2.0              |
| y9+3OH     | 1            | 961.4738               | 961.4755                | 0.0017          | 1.8              |
| y11+3OH    | 1            | 1117.5636              | 1117.5713               | 0.0077          | 6.9              |

2\_2\_2012Col5a1\_Bovine\_HVD3\_CE30 #8192 RT: 74.72 AV: 1 NL: 1.89E5

T: FTMS + p NSI d Full ms2 615.83@hcd30.00 [100.00-1245.00]

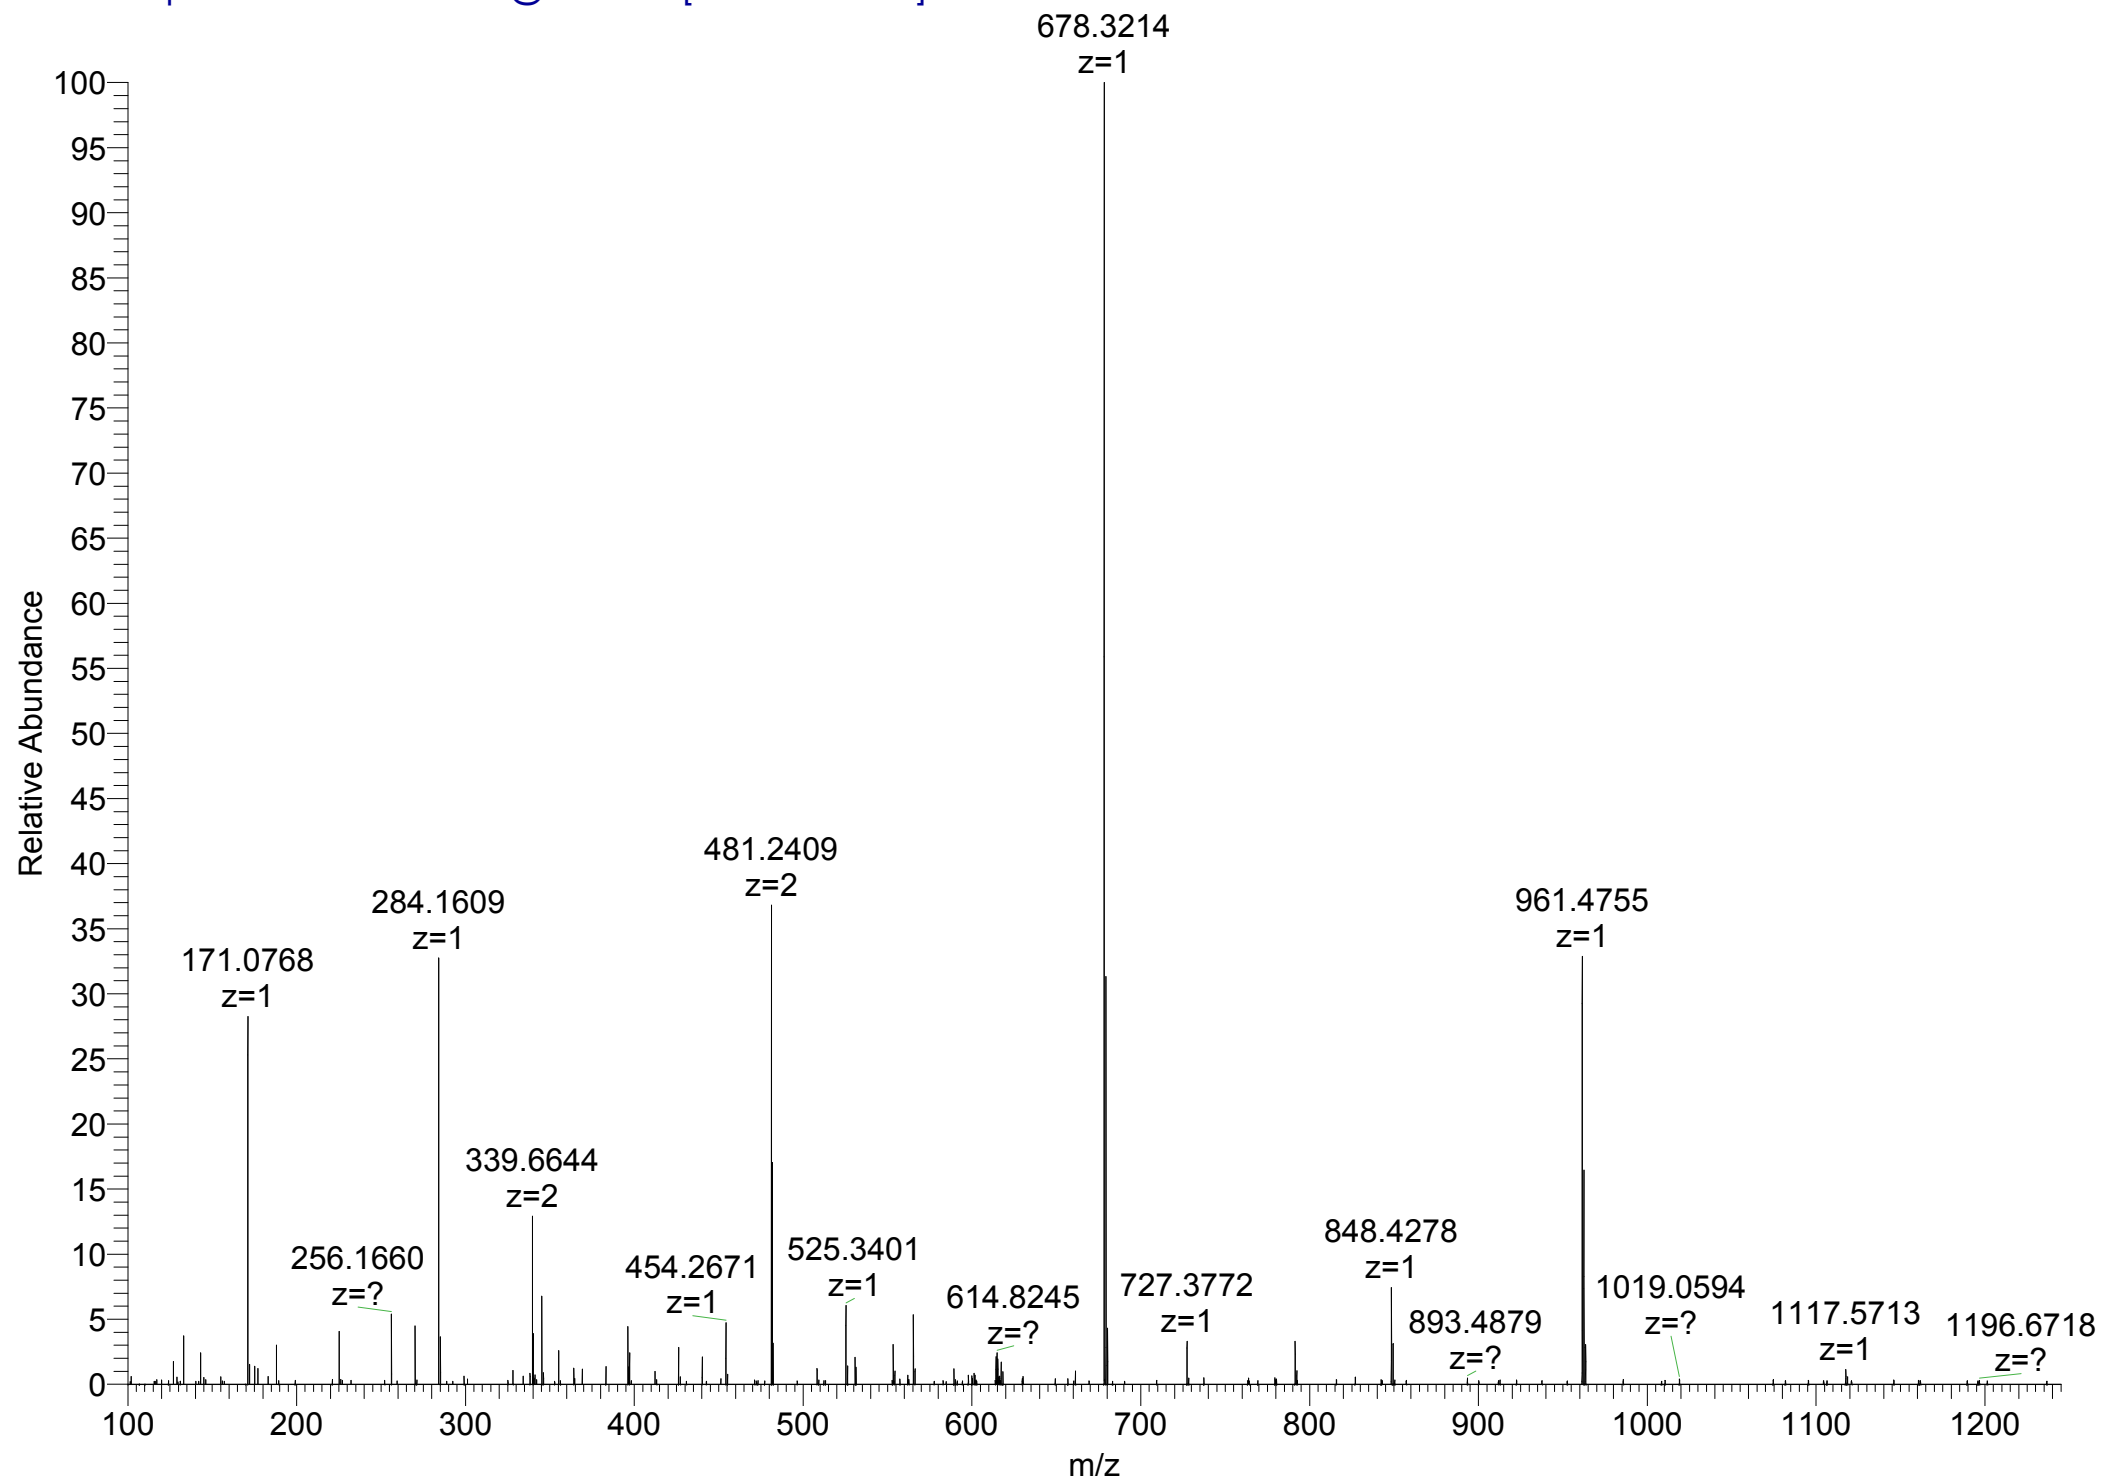

Bovine

23.

**K324-OH.Gal.Glc, P330-OH, P333-OH, K339-OH.Gal.Glc**

#321-342: QGPKSIGFPGFPGANGEKGGR

| Ion                | charge state | Theoretical m/z (mono) | Experimental m/z (mono) | Mass error (Da) | Mass error (PPM) |
|--------------------|--------------|------------------------|-------------------------|-----------------|------------------|
| [M+4H]+4OH+Gal.Glc | 4            | 707.5714               | 707.5726                | 0.0048          | 1.7              |
| PG+OH              | 1            | 171.0764               | 171.0762                | -0.0002         | -1.2             |
| GFP+OH             | 1            | 318.1448               | 318.1448                | 0.0000          | 0.0              |
| y13+3OH            | 3            | 431.2057               | 431.2061                | 0.0012          | 0.9              |
| y10+2OH            | 2            | 487.7361               | 487.7356                | -0.0010         | -1.0             |
| y11+2OH            | 2            | 561.2703               | 561.2703                | 0.0000          | 0.0              |
| y6+OH              | 1            | 619.3158               | 619.3164                | 0.0006          | 1.0              |
| y13+3OH            | 2            | 646.3049               | 646.3037                | -0.0024         | -1.9             |
| b8+OH              | 1            | 741.3890               | 741.3928                | 0.0038          | 5.1              |
| y8+OH              | 1            | 804.3959               | 804.3994                | 0.0035          | 4.4              |
| y9+OH              | 1            | 861.4173               | 861.4163                | -0.0010         | -1.2             |
| y10+2OH            | 1            | 974.4650               | 974.4637                | -0.0013         | -1.3             |
| y13+3OH            | 1            | 1291.6026              | 1291.6013               | -0.0013         | -1.0             |



4\_5\_2012Col5a1\_ArgC\_HCD4 #3469 RT: 28.32 AV: 1 NL: 2.21E4

T: FTMS + p NSI d Full ms2 707.82@hcd35.00 [115.00-2000.00]

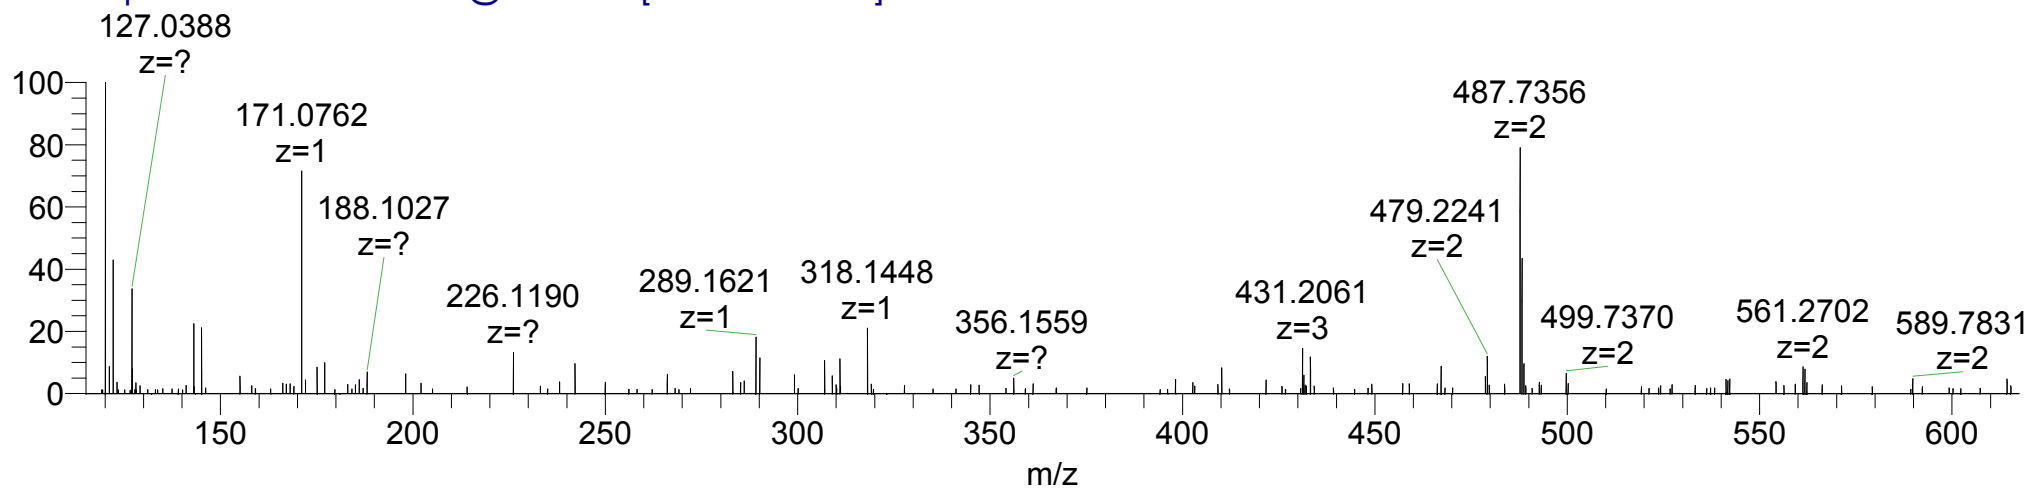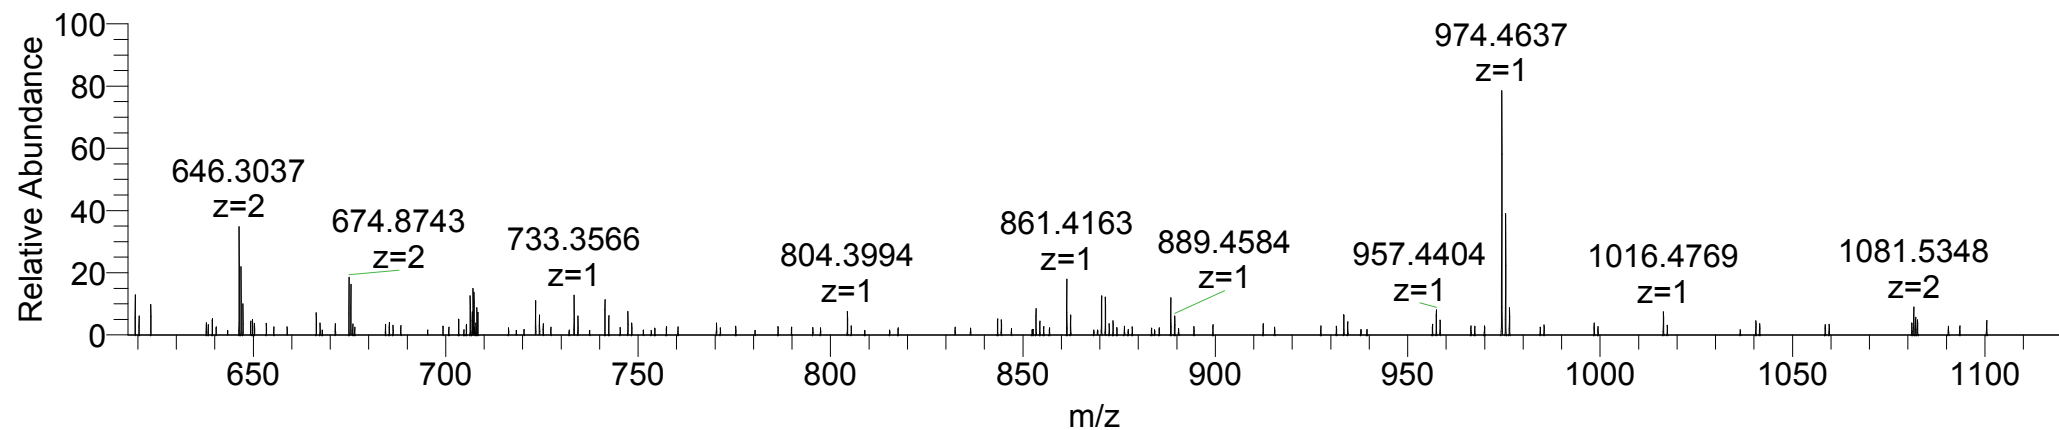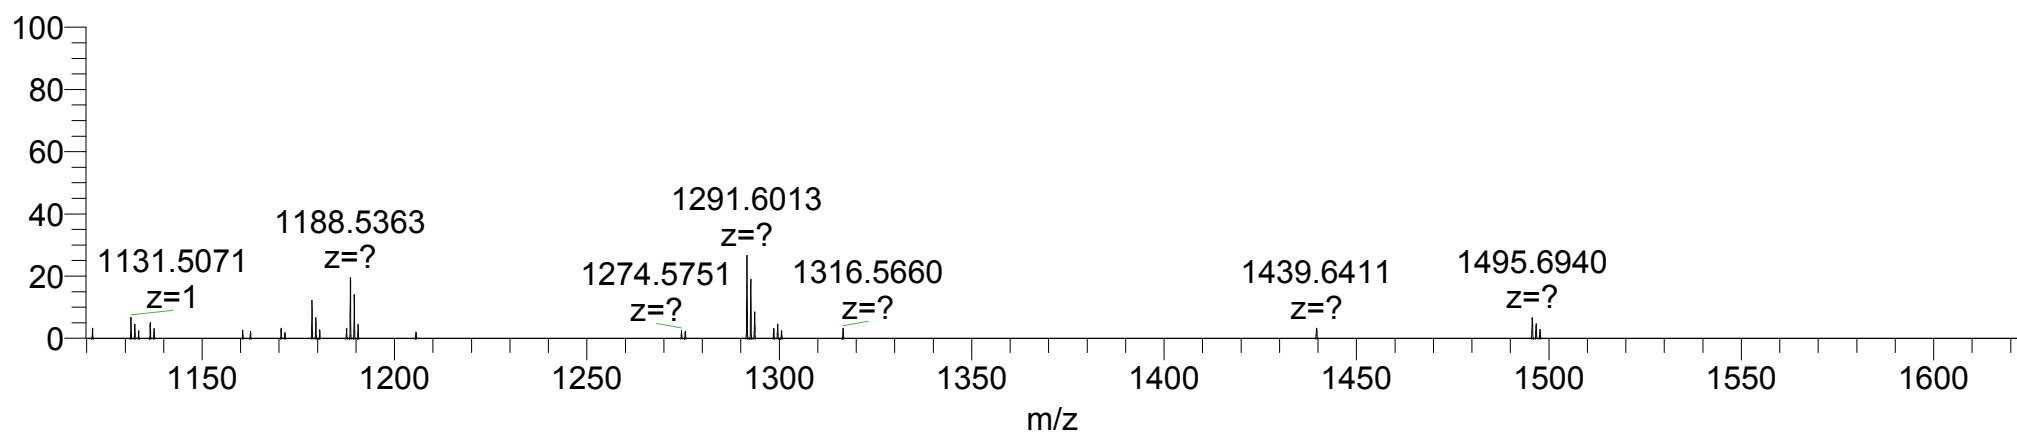

Bovine

**24.**

**P345-OH, P348-OH**

#343-351: GTPPGKPGPR

| Ion        | charge state | Theoretical m/z (mono) | Experimental m/z (mono) | Mass error (Da) | Mass error (PPM) |
|------------|--------------|------------------------|-------------------------|-----------------|------------------|
| [M+3H]+2OH | 3            | 300.1629               | 300.1627                | -0.0006         | -0.7             |
| K          | 1            | 129.1022               | 129.1024                | 0.0002          | 1.6              |
| b2         | 1            | 159.0764               | 159.0766                | 0.0002          | 1.3              |
| GK         | 1            | 186.1237               | 186.1240                | 0.0003          | 1.6              |
| y4+OH      | 2            | 221.6241               | 221.6244                | 0.0006          | 1.4              |
| y7+2OH     | 3            | 247.4732               | 247.4736                | 0.0012          | 1.6              |
| y2         | 1            | 272.1717               | 272.1720                | 0.0003          | 1.1              |
| PGK+OH     | 1            | 299.1714               | 299.1712                | -0.0002         | -0.7             |
| y3         | 1            | 329.1932               | 329.1938                | 0.0006          | 1.8              |
| y7+2OH     | 2            | 370.7061               | 370.7065                | 0.0008          | 1.1              |
| y4-NH3+OH  | 1            | 425.2143               | 425.2150                | 0.0007          | 1.7              |
| y4+OH      | 1            | 442.2409               | 442.2415                | 0.0006          | 1.4              |
| y5+OH      | 1            | 570.3358               | 570.3369                | 0.0011          | 1.9              |
| y6+OH      | 1            | 627.3573               | 627.3575                | 0.0002          | 0.3              |

2\_2\_2012Col5a1\_Bovine\_HCD1\_CE30 #790 RT: 7.81 AV: 1 NL: 1.18E5

T: FTMS + p NSI d Full ms2 300.16@hcd30.00 [100.00-915.00]

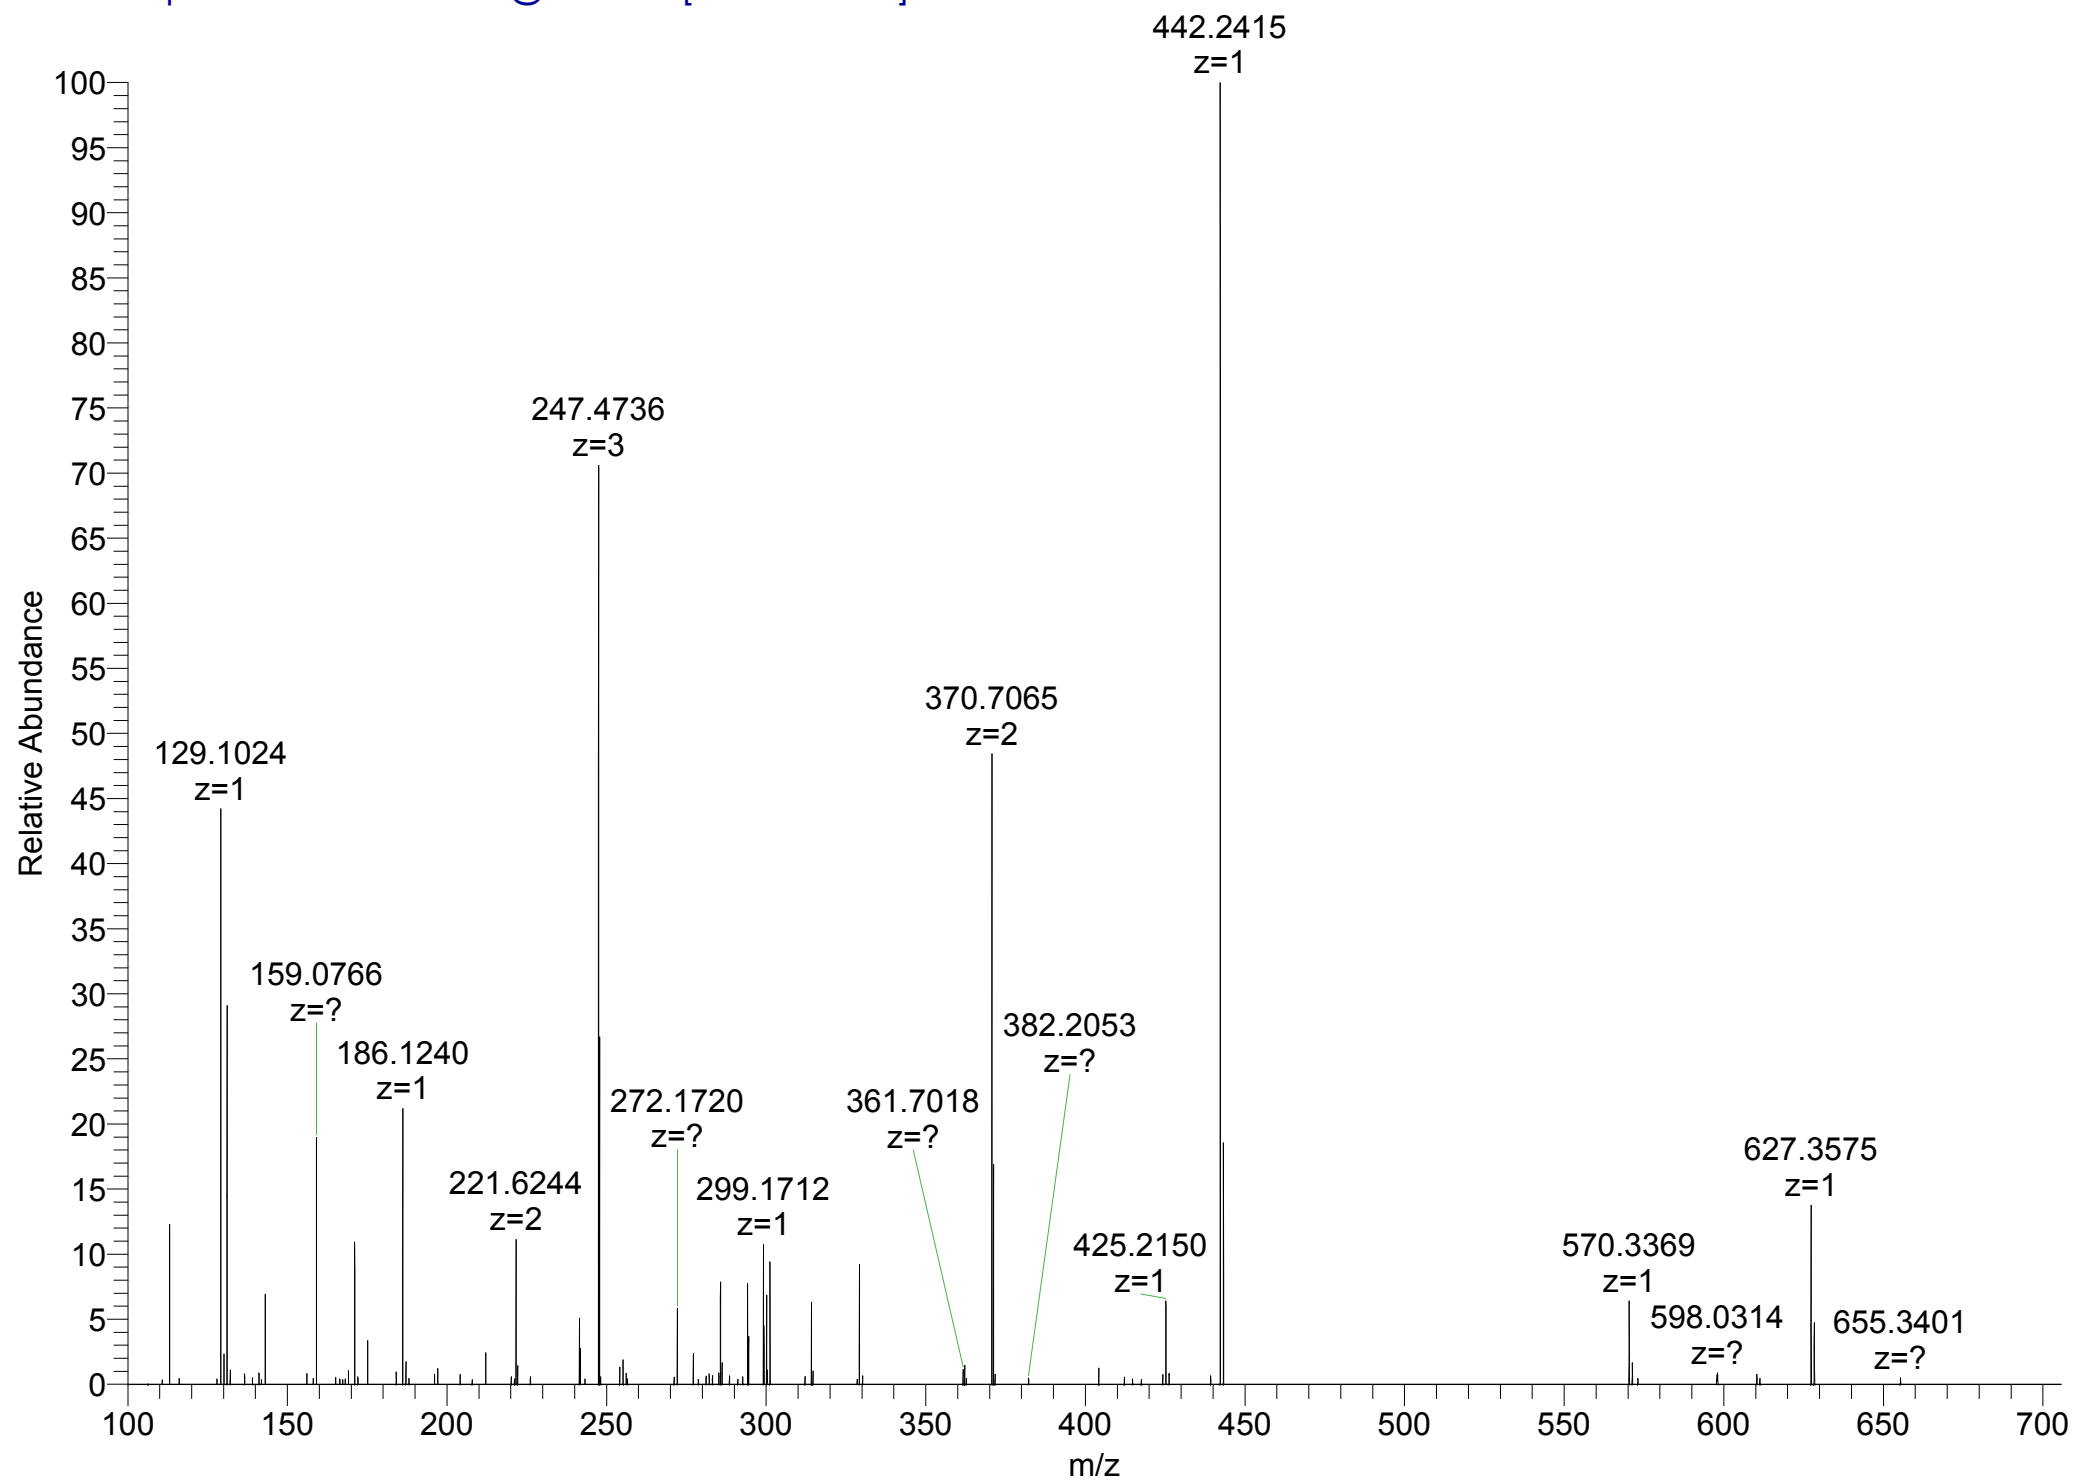

Bovine

25.

**P372-OH, K375-OHGal.Glc, P386-OH, P387-OH**

#367-390: GITGKPGPKGNSSGGDGPAGPPPER

| Ion                | charge state | Theoretical m/z (mono) | Experimental m/z (mono) | Mass error (Da) | Mass error (PPM) |
|--------------------|--------------|------------------------|-------------------------|-----------------|------------------|
| [M+3H]+4OH+Gal.Glc | 3            | 850.0591               | 850.0590                | -0.0003         | -0.1             |
| K                  | 1            | 129.1022               | 129.1021                | -0.0001         | -0.8             |
| a2                 | 1            | 143.1179               | 143.1177                | -0.0002         | -1.4             |
| GK                 | 1            | 186.1237               | 186.1235                | -0.0002         | -1.1             |
| KP+OH              | 1            | 242.1499               | 242.1497                | -0.0002         | -0.8             |
| TGK                | 1            | 287.1714               | 287.1710                | -0.0004         | -1.4             |
| y8+2OH             | 2            | 406.6985               | 406.6982                | -0.0006         | -0.7             |
| PGPV+OH            | 1            | 412.2191               | 412.2187                | -0.0004         | -1.0             |
| y4+OH              | 1            | 474.2307               | 474.2297                | -0.0010         | -2.1             |
| y5+2OH             | 1            | 587.2784               | 587.2778                | -0.0006         | -1.0             |
| y6+2OH             | 1            | 644.2998               | 644.2998                | 0.0000          | 0.0              |
| y7+2OH             | 1            | 715.3369               | 715.3363                | -0.0006         | -0.8             |
| y17+3OH            | 2            | 799.3637               | 799.3596                | -0.0082         | -5.1             |
| y8+2OH             | 1            | 812.3897               | 812.3890                | -0.0007         | -0.9             |
| y9+2OH             | 1            | 869.4112               | 869.4096                | -0.0016         | -1.8             |
| y19+4OH            | 2            | 884.3983               | 884.3976                | -0.0014         | -0.8             |
| PGPKGNSGGP+2OH     | 1            | 899.3854               | 899.3853                | -0.0001         | -0.1             |
| y10+2OH            | 1            | 984.4381               | 984.4350                | -0.0031         | -3.2             |
| y22+4OH            | 2            | 1027.4803              | 1027.4800               | -0.0006         | -0.3             |
| y12+2OH            | 1            | 1098.4810              | 1098.4812               | 0.0002          | 0.2              |
| y13+2OH            | 1            | 1185.5131              | 1185.5143               | 0.0012          | 1.0              |
| y14+2OH            | 1            | 1299.5560              | 1299.5494               | -0.0066         | -5.1             |
| y15+2OH            | 1            | 1356.5775              | 1356.5786               | 0.0011          | 0.8              |
| y19+4OH            | 1            | 1767.7892              | 1767.7932               | 0.0040          | 2.3              |

4\_5\_2012Col5a1\_Trypsin\_nontrapping\_HCD1 #4645 RT: 38.42 AV: 1 NL: 1.17E5

T: FTMS + p NSI d Full ms2 850.39@hcd35.00 [115.00-2000.00]

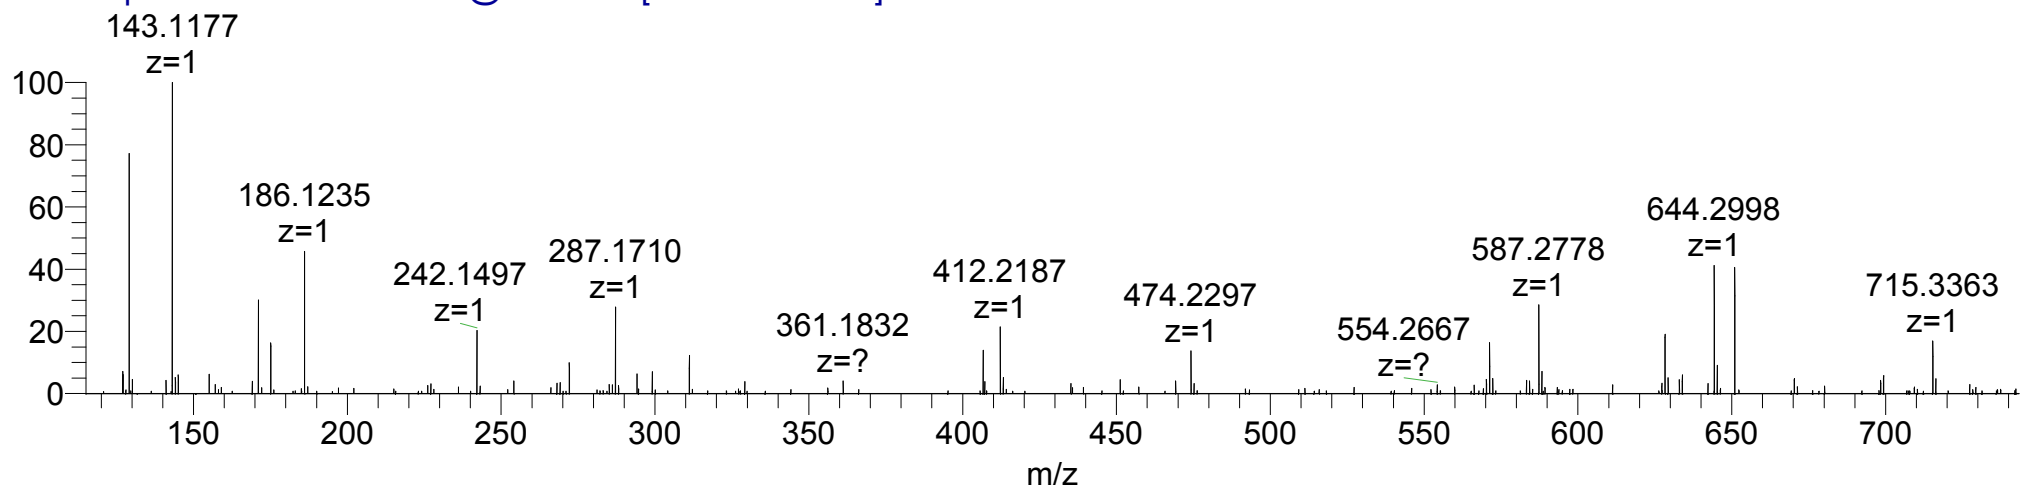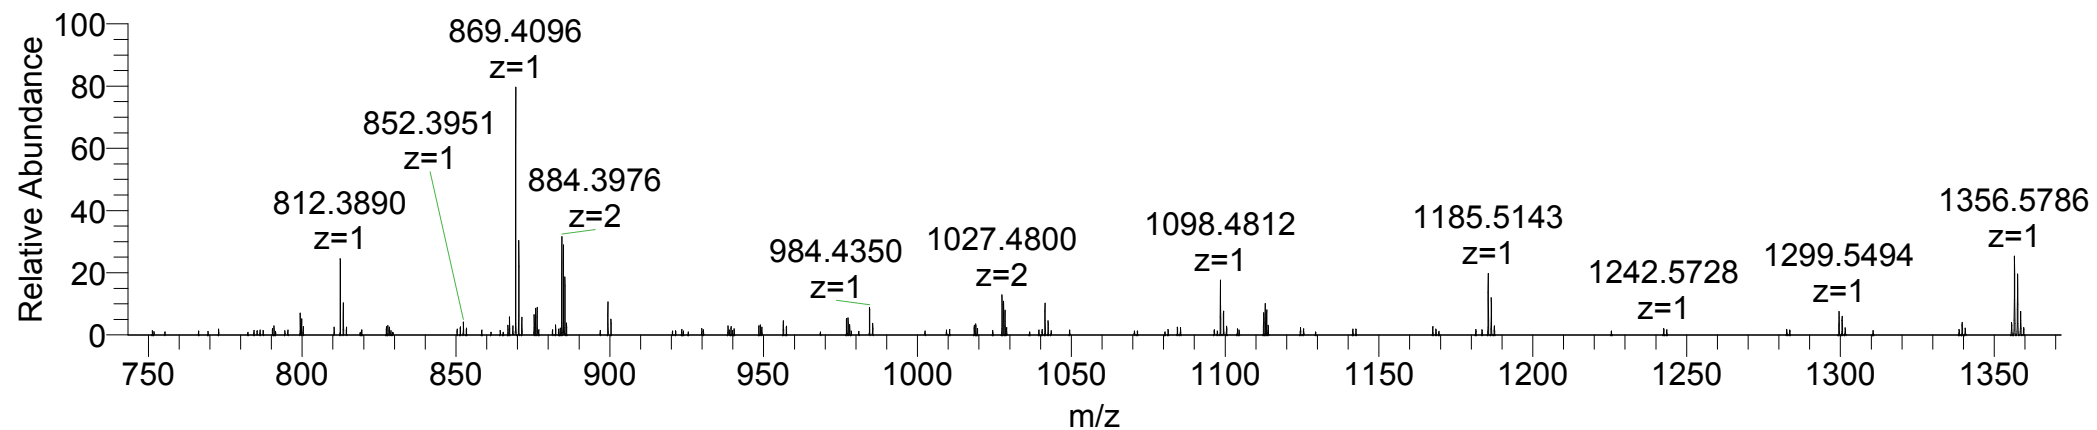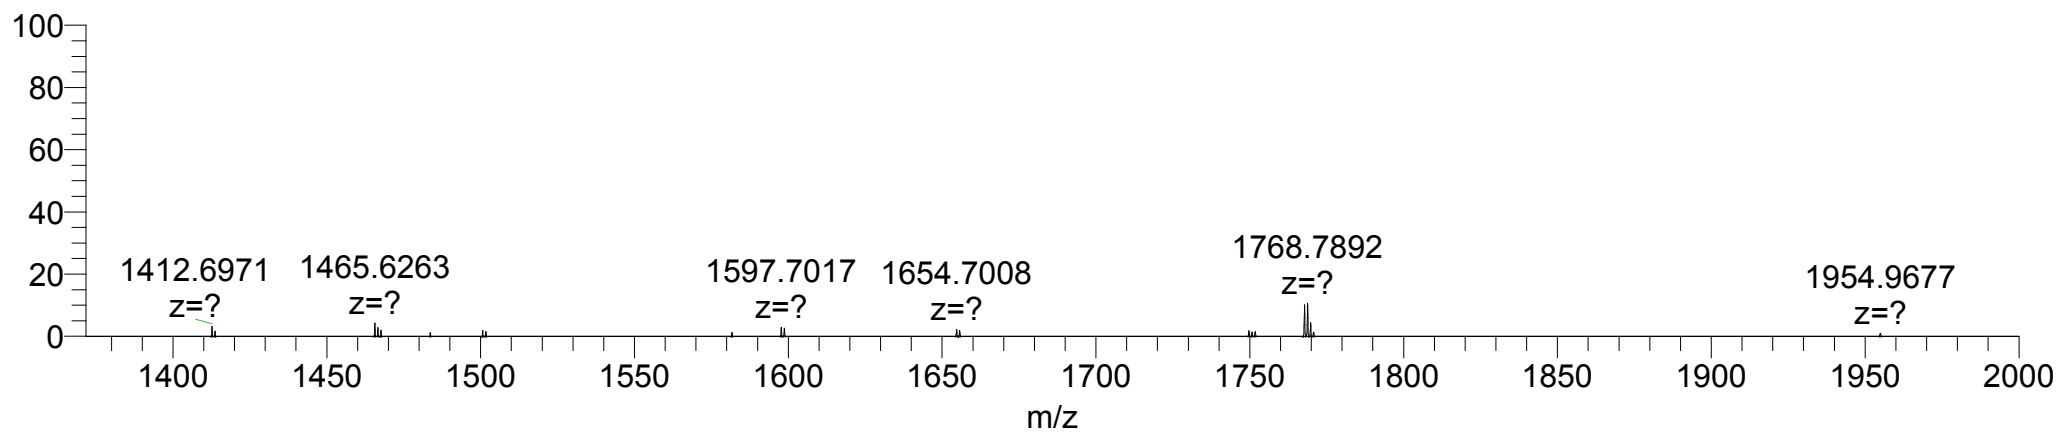

Bovine

26.

P402-OH

#391-405: GPNGPQGPTGFPGPK

| Ion        | charge state | Theoretical m/z (mono) | Experimental m/z (mono) | Mass error (Da) | Mass error (PPM) |
|------------|--------------|------------------------|-------------------------|-----------------|------------------|
| [M+2H]+2OH | 2            | 720.3493               | 720.3513                | 0.0040          | 2.8              |
| y3+OH      | 1            | 317.1819               | 317.1833                | 0.0014          | 4.4              |
| y4+OH      | 1            | 430.2296               | 430.2309                | 0.0013          | 3.0              |
| a6-2NH3    | 1            | 489.2092               | 489.2108                | 0.0016          | 3.3              |
| b6-2NH3    | 1            | 517.2041               | 517.2056                | 0.0015          | 2.9              |
| y11+2OH    | 2            | 557.7800               | 557.7820                | 0.0040          | 3.6              |
| y12+2OH    | 2            | 586.2907               | 586.2932                | 0.0050          | 4.3              |
| y6+2OH     | 1            | 634.3195               | 634.3211                | 0.0016          | 2.5              |
| y8+2OH     | 1            | 832.4199               | 832.4229                | 0.0030          | 3.6              |
| y9+2OH     | 1            | 889.4414               | 889.4443                | 0.0029          | 3.3              |
| y11+2OH    | 1            | 1114.5527              | 1114.5581               | 0.0054          | 4.8              |
| y12+2OH    | 1            | 1171.5742              | 1171.5784               | 0.0042          | 3.6              |

\*Unlocalized sites: P404-OH?, K405-OH?

Pseudolocalized sites: K405-OH

2\_2\_2012Col5a1\_Bovine\_Top5MS3 #1632 RT: 19.25 AV: 1 NL: 2.36E5

T: FTMS + p NSI d Full ms2 720.35@cid35.00 [185.00-1455.00]

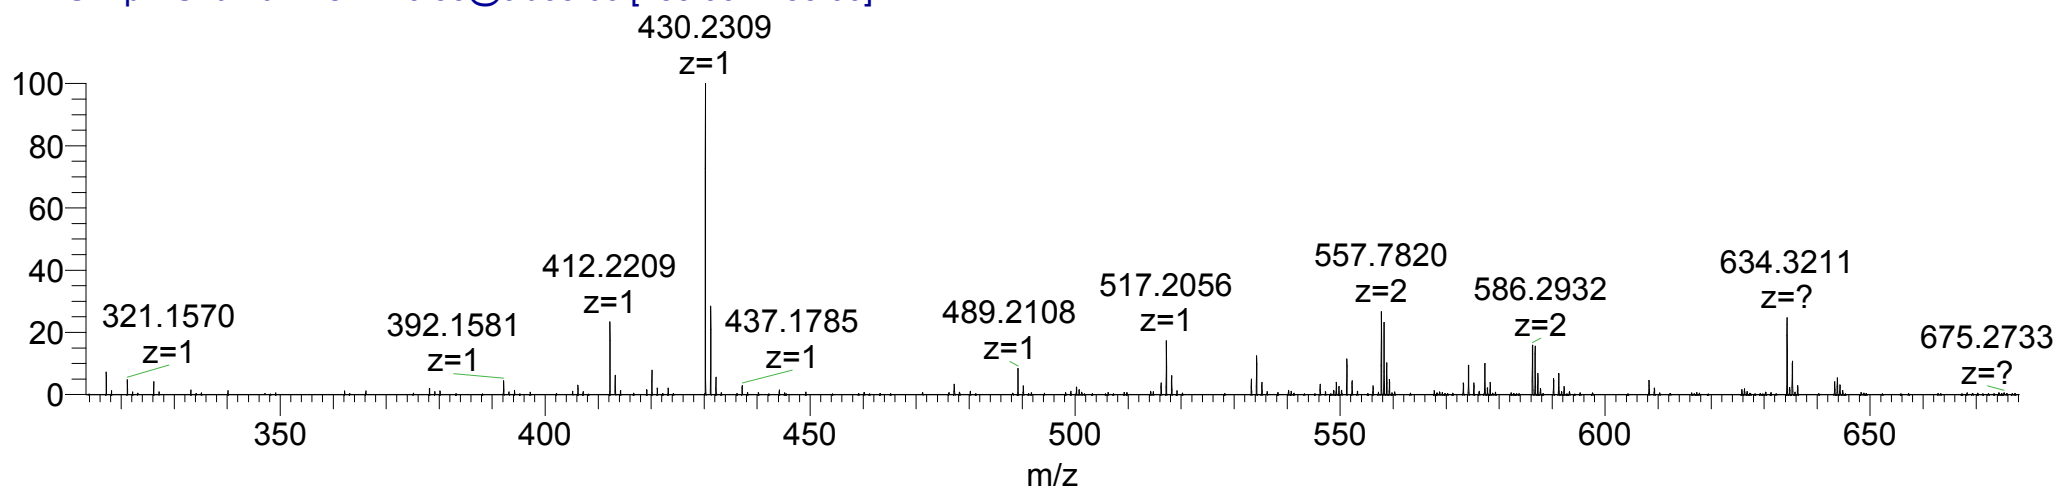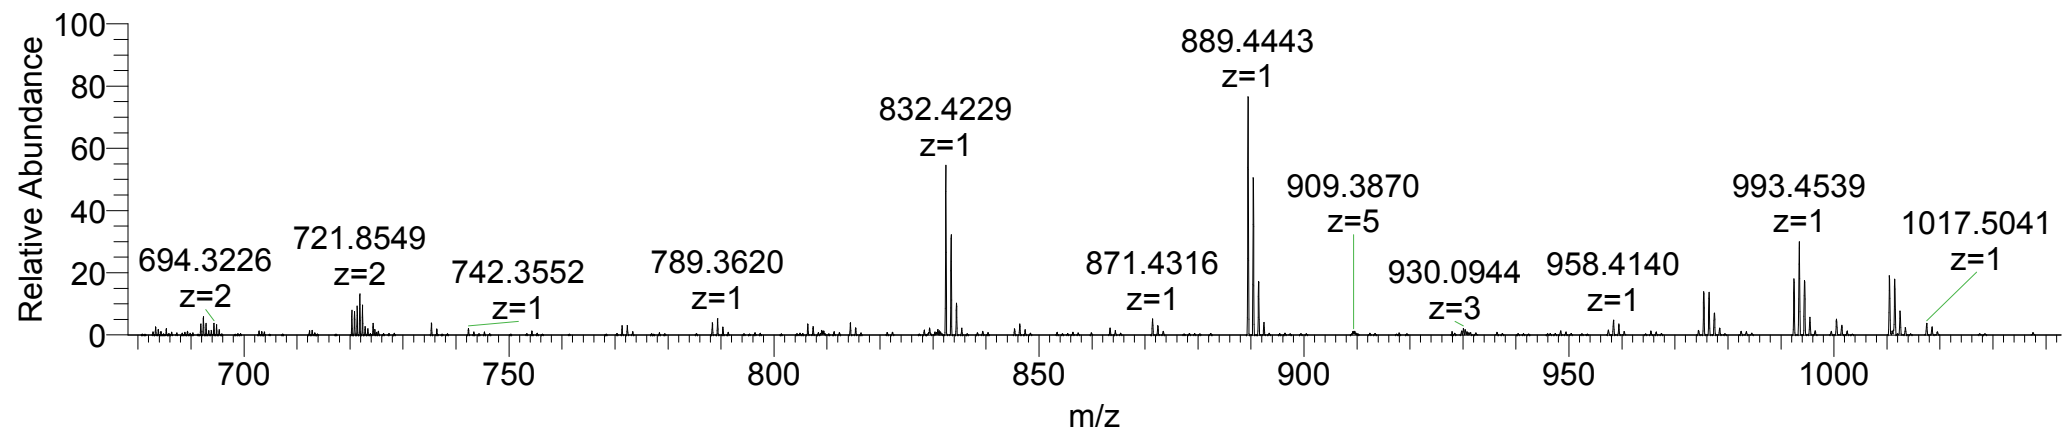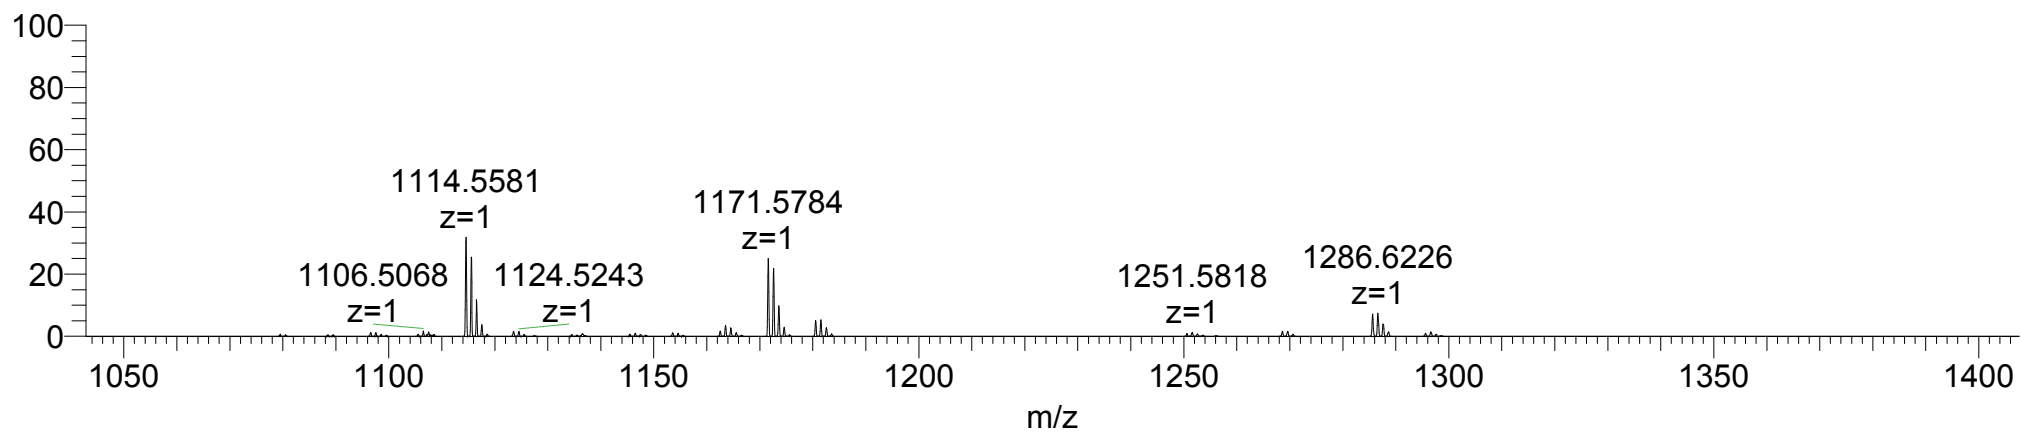

Bovine

27.

**P407-OH, P408-OH, P410-OH, P411-OH, P417-OH, P420-OH**

#406-423: GPPGPPGKDGLPGHPGQR

| Ion                 | charge state | Theoretical m/z (mono) | Experimental m/z (mono) | Mass error (Da) | Mass error (PPM) |
|---------------------|--------------|------------------------|-------------------------|-----------------|------------------|
| [M+2H]+6OH          | 2            | 908.9323               | 908.9326                | 0.0006          | 0.3              |
| a2/PG-28+OH         | 1            | 143.0815               | 143.0813                | -0.0002         | -1.4             |
| b2/PG+OH            | 1            | 171.0764               | 171.0762                | -0.0002         | -1.2             |
| b3+2OH/PPG+2OH      | 1            | 284.1241               | 284.1238                | -0.0003         | -1.1             |
| GPPG+2OH/<br>b4+2OH | 1            | 341.1456               | 341.1456                | 0.0000          | 0.0              |
| PPGK+2OH            | 1            | 412.2191               | 412.2194                | 0.0003          | 0.7              |
| y4+OH               | 1            | 473.2467               | 473.2462                | -0.0005         | -1.1             |
| PPGKD+2OH           | 1            | 527.2460               | 527.2472                | 0.0012          | 2.3              |
| y5+OH               | 1            | 610.3056               | 610.3046                | -0.0010         | -1.6             |
| y6+OH               | 1            | 667.3270               | 667.3272                | 0.0002          | 0.3              |
| y14+4OH             | 2            | 738.8631               | 738.8624                | -0.0014         | -0.9             |
| y7+2OH              | 1            | 780.3747               | 780.3737                | -0.0010         | -1.3             |
| y16+5OH             | 2            | 823.8977               | 823.8994                | 0.0034          | 2.1              |
| [M+2H]+6OH          | 2            | 908.9323               | 908.9303                | -0.0040         | -2.2             |
| y9+2OH              | 1            | 950.4803               | 950.4794                | -0.0009         | -0.9             |
| y10+2OH             | 1            | 1065.5072              | 1065.5063               | -0.0009         | -0.8             |
| y11+2OH             | 1            | 1193.6022              | 1193.6077               | 0.0055          | 4.6              |
| y13+3OH             | 1            | 1363.6713              | 1363.6709               | -0.0004         | -0.3             |
| y14+4OH             | 1            | 1476.7190              | 1476.7222               | 0.0032          | 2.2              |
| y15+4OH             | 1            | 1533.7404              | 1533.7393               | -0.0011         | -0.7             |
| y16+5OH             | 1            | 1646.7881              | 1646.7896               | 0.0015          | 0.9              |



4\_5\_2012Col5a1\_Trypsin\_nontrapping\_HCD1 #3719 RT: 31.40 AV: 1 NL: 4.47E4

T: FTMS + p NSI d Full ms2 909.43@hcd35.00 [115.00-1830.00]

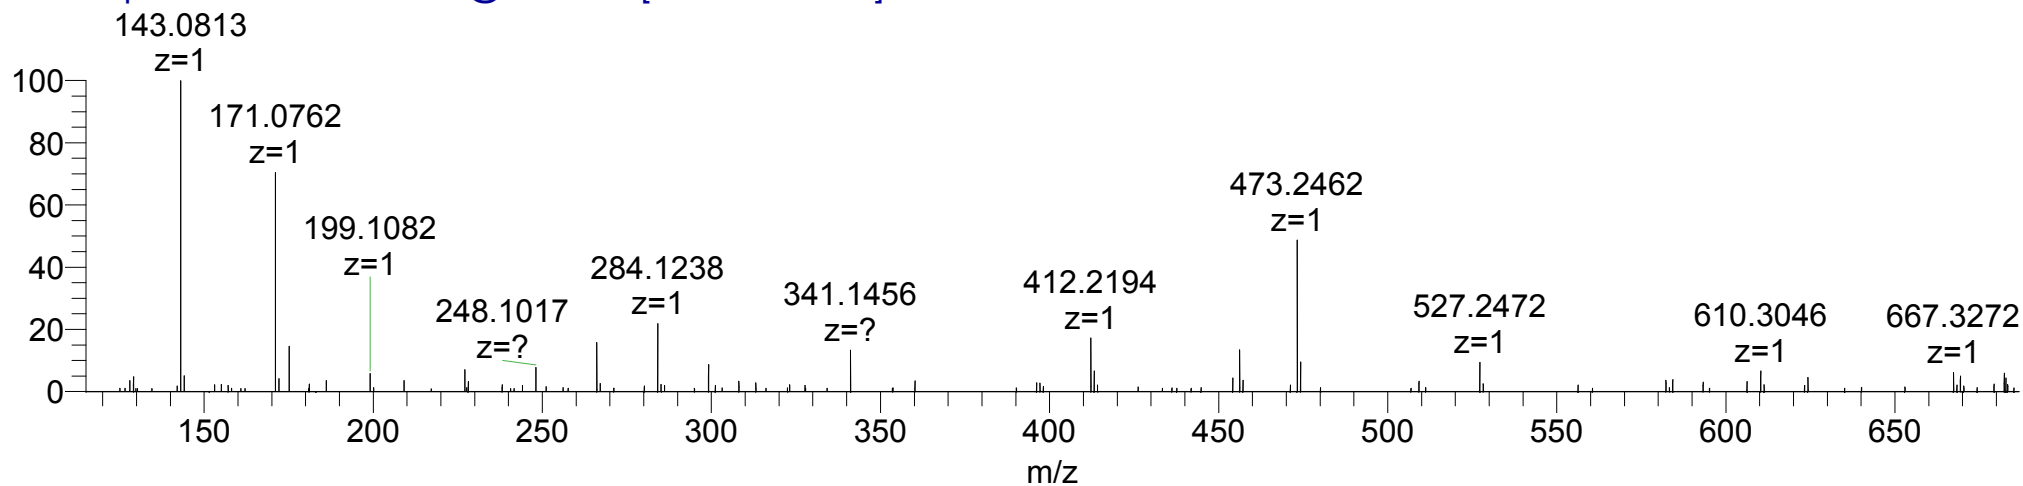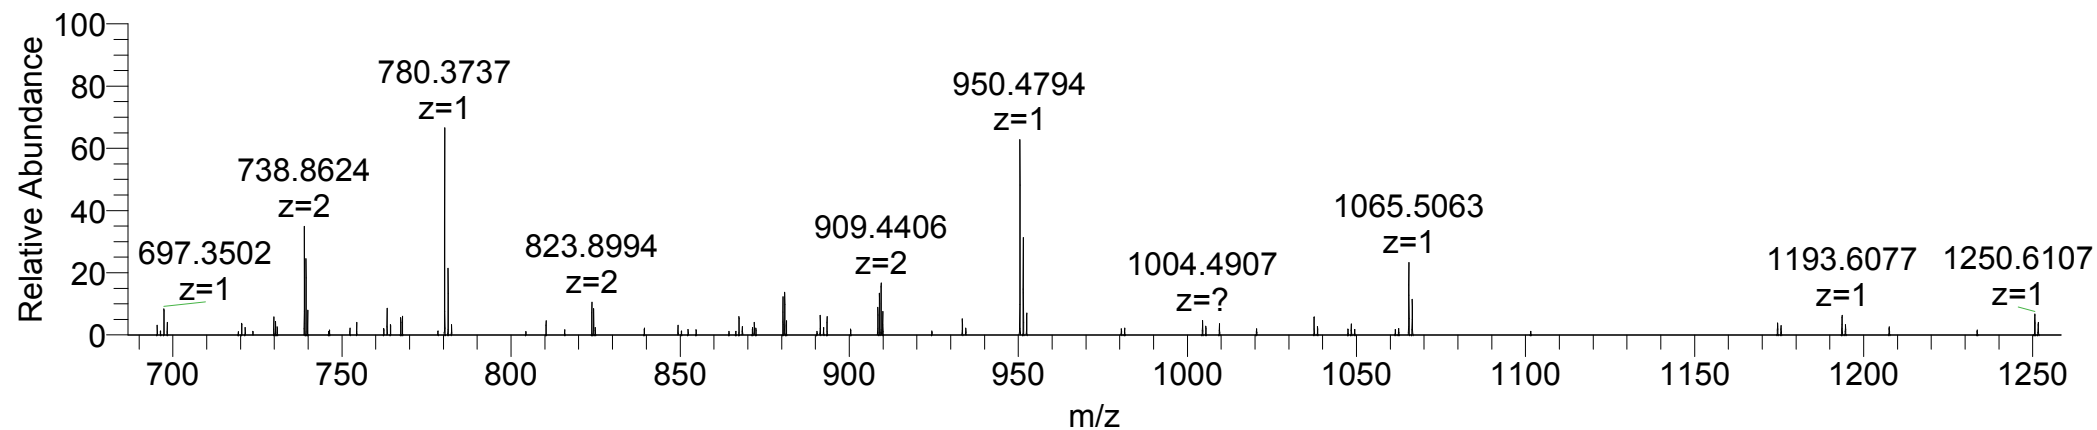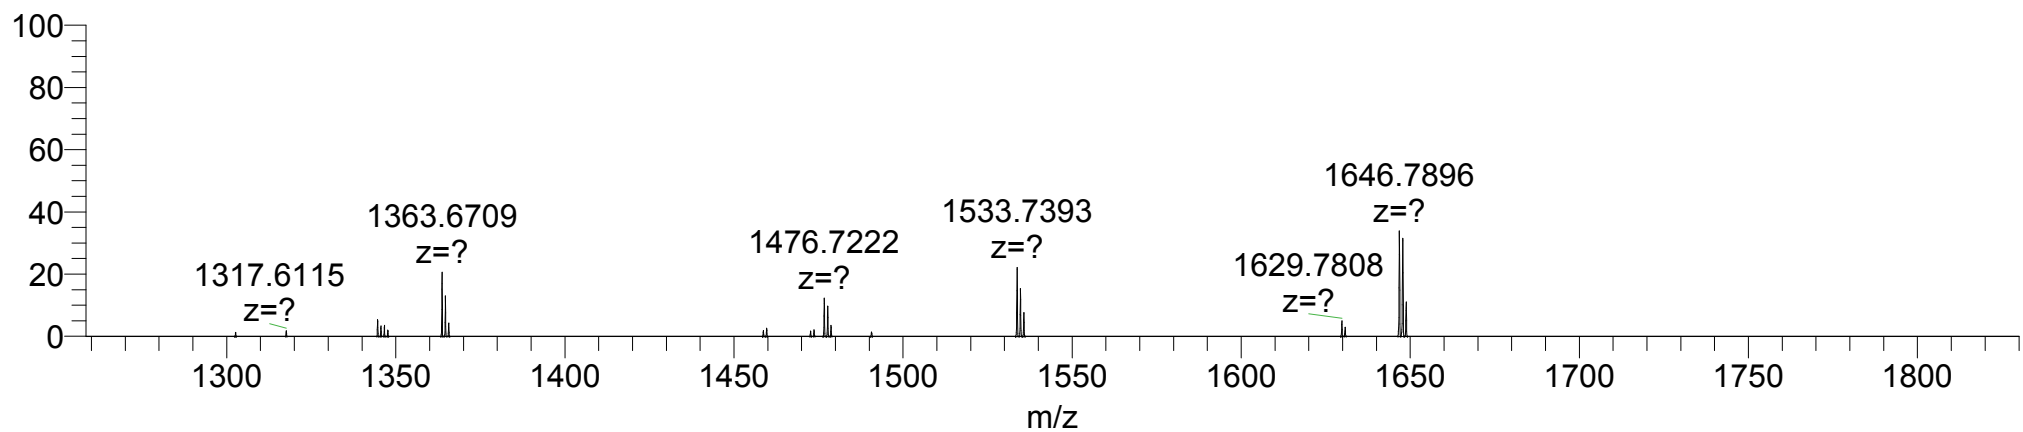

Bovine

28.

P434-OH, P435-OH, P437-OH, P438-OH

#432-456: TGPPGPPGVVGPQQPTGETGPMGER

| Ion          | charge state | Theoretical m/z (mono) | Experimental m/z (mono) | Mass error (Da) | Mass error (PPM) |
|--------------|--------------|------------------------|-------------------------|-----------------|------------------|
| [M+3H]+4OH   | 3            | 798.3728               | 798.3746                | 0.0054          | 2.3              |
| PQ           | 1            | 226.1186               | 226.1189                | 0.0003          | 1.3              |
| GPT          | 1            | 256.1292               | 256.1293                | 0.0001          | 0.4              |
| PQG          | 1            | 283.1401               | 283.1406                | 0.0005          | 1.8              |
| y5           | 2            | 295.1418               | 295.1419                | 0.0002          | 0.3              |
| y3           | 1            | 361.1830               | 361.1833                | 0.0003          | 0.8              |
| b4+2OH/ETGP  | 1            | 385.1718               | 385.1721                | 0.0003          | 0.8              |
| b5+2OH/GPTGE | 1            | 442.1932               | 442.1943                | 0.0011          | 2.5              |
| PPGVV+2OH    | 1            | 482.2609               | 482.2630                | 0.0021          | 4.4              |
| y11          | 2            | 566.2586               | 566.2590                | 0.0008          | 0.7              |
| y5           | 1            | 589.2763               | 589.2767                | 0.0004          | 0.7              |
| y12          | 2            | 594.7693               | 594.7704                | 0.0022          | 1.9              |
| y6           | 1            | 646.2977               | 646.2983                | 0.0006          | 0.9              |
| PPGPPGV+4OH  | 1            | 666.3093               | 666.3109                | 0.0016          | 2.4              |
| y14          | 2            | 707.3250               | 707.3250                | 0.0000          | 0.0              |
| y15          | 2            | 735.8357               | 735.8370                | 0.0026          | 1.8              |
| y7           | 1            | 747.3454               | 747.3467                | 0.0013          | 1.7              |
| PPGPPGVV+4OH | 1            | 765.3777               | 765.3793                | 0.0016          | 2.1              |
| y16          | 2            | 785.3699               | 785.3702                | 0.0006          | 0.4              |
| b9+4OH       | 1            | 824.3785               | 824.3810                | 0.0025          | 3.0              |
| y8           | 1            | 876.3880               | 876.3879                | -0.0001         | -0.1             |
| b10+4OH      | 1            | 923.4469               | 923.4485                | 0.0016          | 1.7              |
| y9           | 1            | 933.4095               | 933.4103                | 0.0008          | 0.9              |
| y20+2OH      | 2            | 976.4625               | 976.4644                | 0.0038          | 1.9              |
| b11+4OH      | 1            | 980.4684               | 980.4689                | 0.0005          | 0.5              |
| y10          | 1            | 1034.4571              | 1034.4589               | 0.0018          | 1.7              |
| y11-H2O      | 1            | 1113.4993              | 1113.5045               | 0.0052          | 4.7              |
| y11          | 1            | 1131.5099              | 1131.5126               | 0.0027          | 2.4              |
| y12-H2O      | 1            | 1170.5208              | 1170.5247               | 0.0039          | 3.3              |
| y12          | 1            | 1188.5314              | 1188.5342               | 0.0028          | 2.4              |

2\_2\_2012Col5a1\_Bovine\_HCD1\_CE30 #2840 RT: 23.43 AV: 1 NL: 1.12E5

T: FTMS + p NSI d Full ms2 798.71@hcd30.00 [100.00-2000.00]

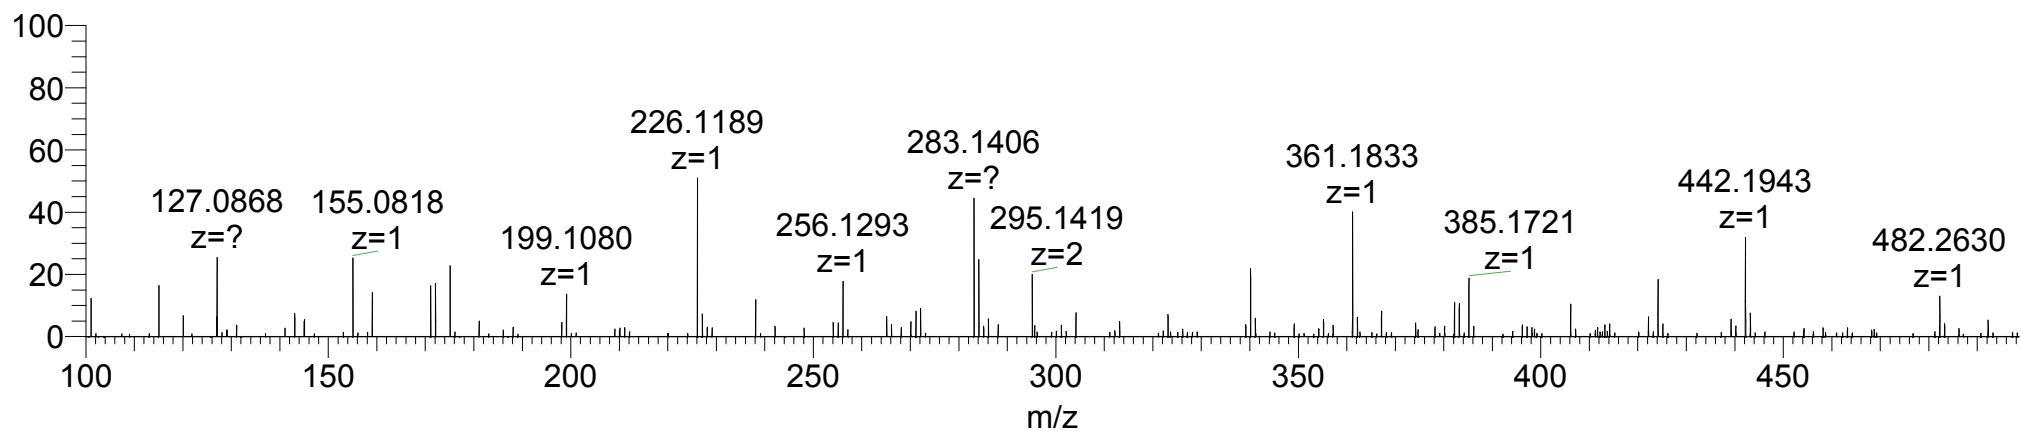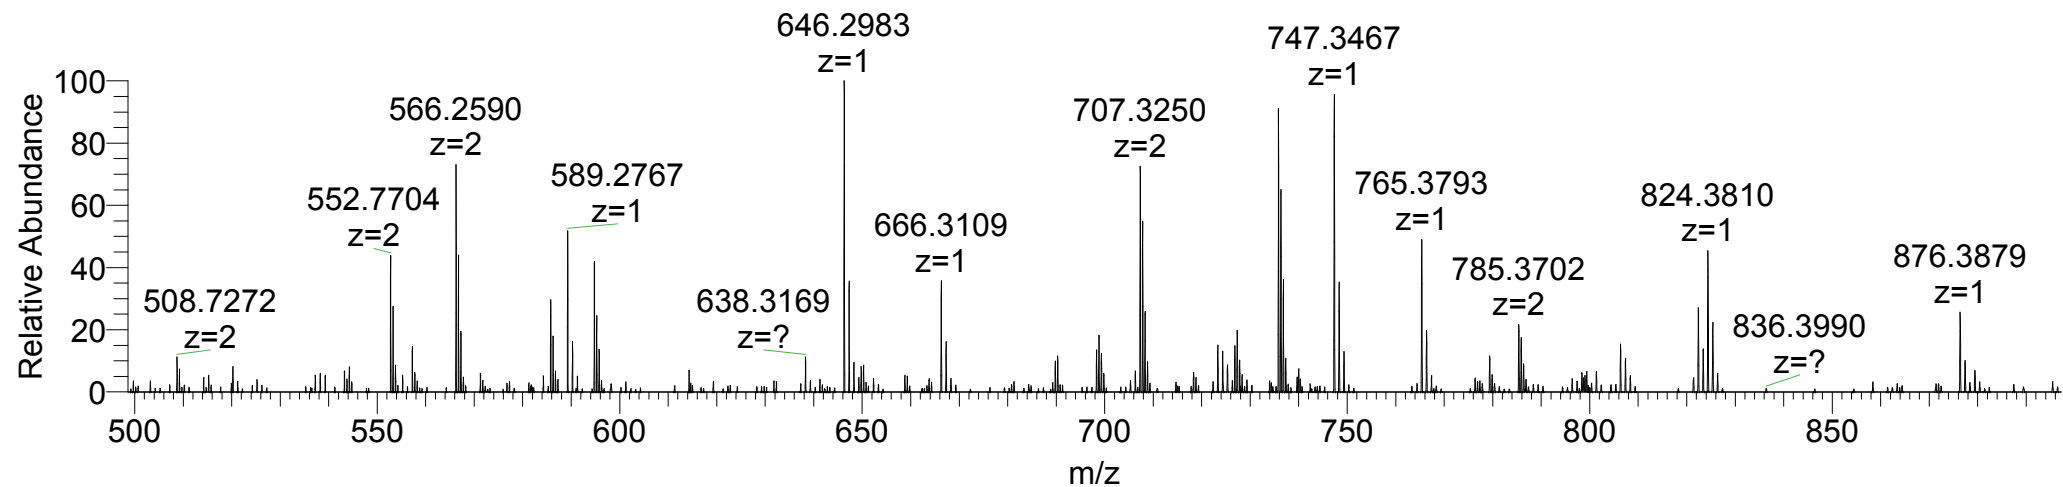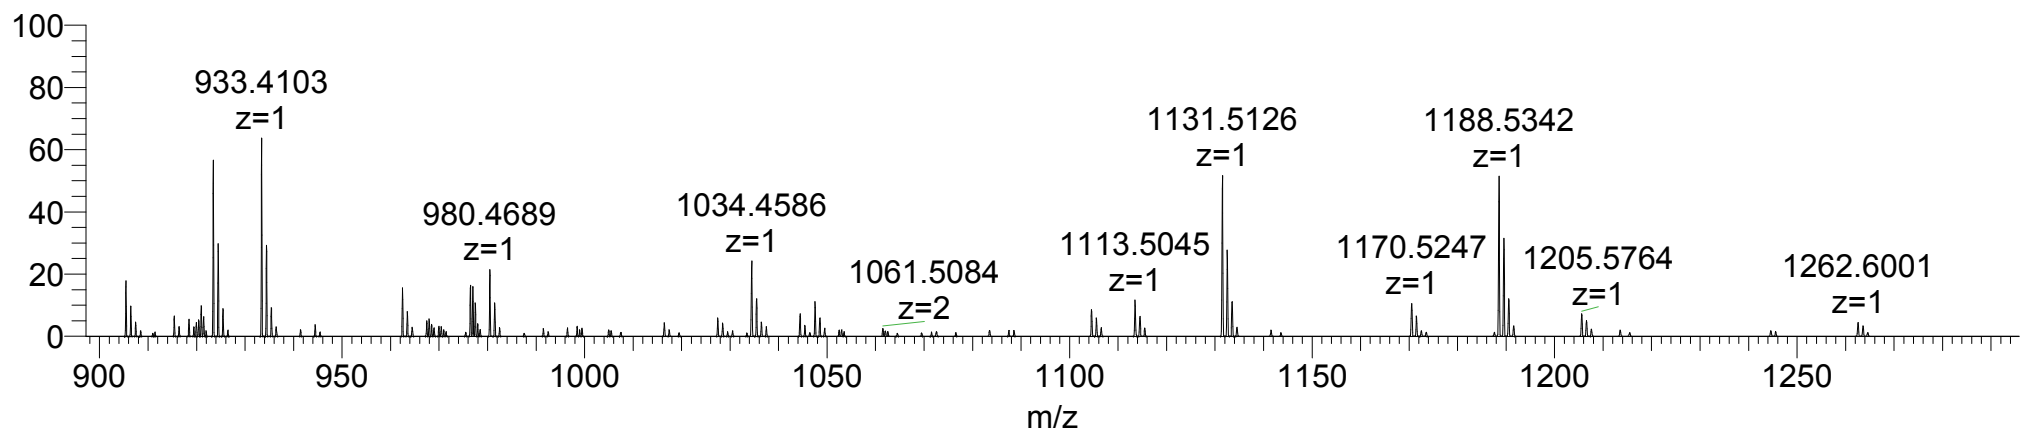

Bovine

29.

P459-OH, P461-OH,P462-OH,P464-OH,P465-OH,P471-OH

#457-476: GHPGGPPGPPGEQGLPGLAGK

| Ion        | charge state | Theoretical m/z (mono) | Experimental m/z (mono) | Mass error (Da) | Mass error (PPM) |
|------------|--------------|------------------------|-------------------------|-----------------|------------------|
| [M+3H]+6OH | 3            | 639.3097               | 639.3101                | 0.0012          | 0.6              |
| b2         | 1            | 195.0877               | 195.0877                | 0.0000          | 0.0              |
| y2         | 1            | 204.1343               | 204.1343                | 0.0000          | 0.0              |
| y3         | 1            | 275.1714               | 275.1716                | 0.0002          | 0.7              |
| y6+OH      | 2            | 279.6659               | 279.6662                | 0.0006          | 1.1              |
| b8+4OH     | 2            | 381.1643               | 381.1644                | 0.0002          | 0.3              |
| GPPGP+3OH  | 1            | 454.1932               | 454.1931                | -0.0001         | -0.2             |
| b11+5OH    | 2            | 530.7202               | 530.7205                | 0.0006          | 0.6              |
| y6+OH      | 1            | 558.3246               | 558.3248                | 0.0002          | 0.4              |
| b13        | 2            | 623.2602               | 623.2603                | 0.0002          | 0.2              |
| y13+3OH    | 2            | 634.8277               | 634.8275                | -0.0004         | -0.3             |
| b7+3OH     | 1            | 648.2736               | 648.2739                | 0.0003          | 0.5              |
| y8+OH      | 1            | 728.4301               | 728.4299                | -0.0002         | -0.3             |
| y16+5OH    | 2            | 776.3861               | 776.3872                | 0.0022          | 1.4              |
| y9-NH3+OH  | 1            | 839.4621               | 839.4642                | 0.0021          | 2.5              |
| b10+5OH    | 1            | 931.3904               | 931.3901                | -0.0003         | -0.3             |
| b11+5OH    | 1            | 1060.4330              | 1060.4331               | 0.0001          | 0.1              |

2\_2\_2012Col5a1\_Bovine\_HCD1\_CE30 #1921 RT: 16.46 AV: 1 NL: 1.07E7

T: FTMS + p NSI d Full ms2 639.64@hcd30.00 [100.00-1930.00]

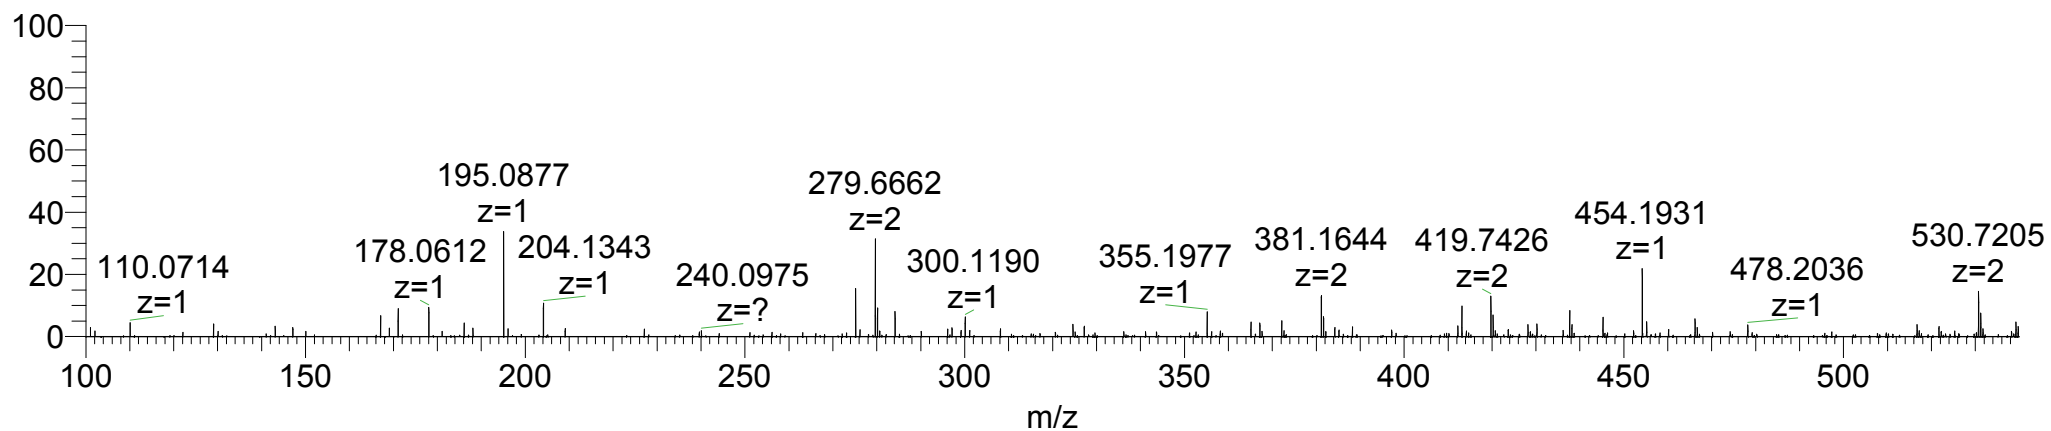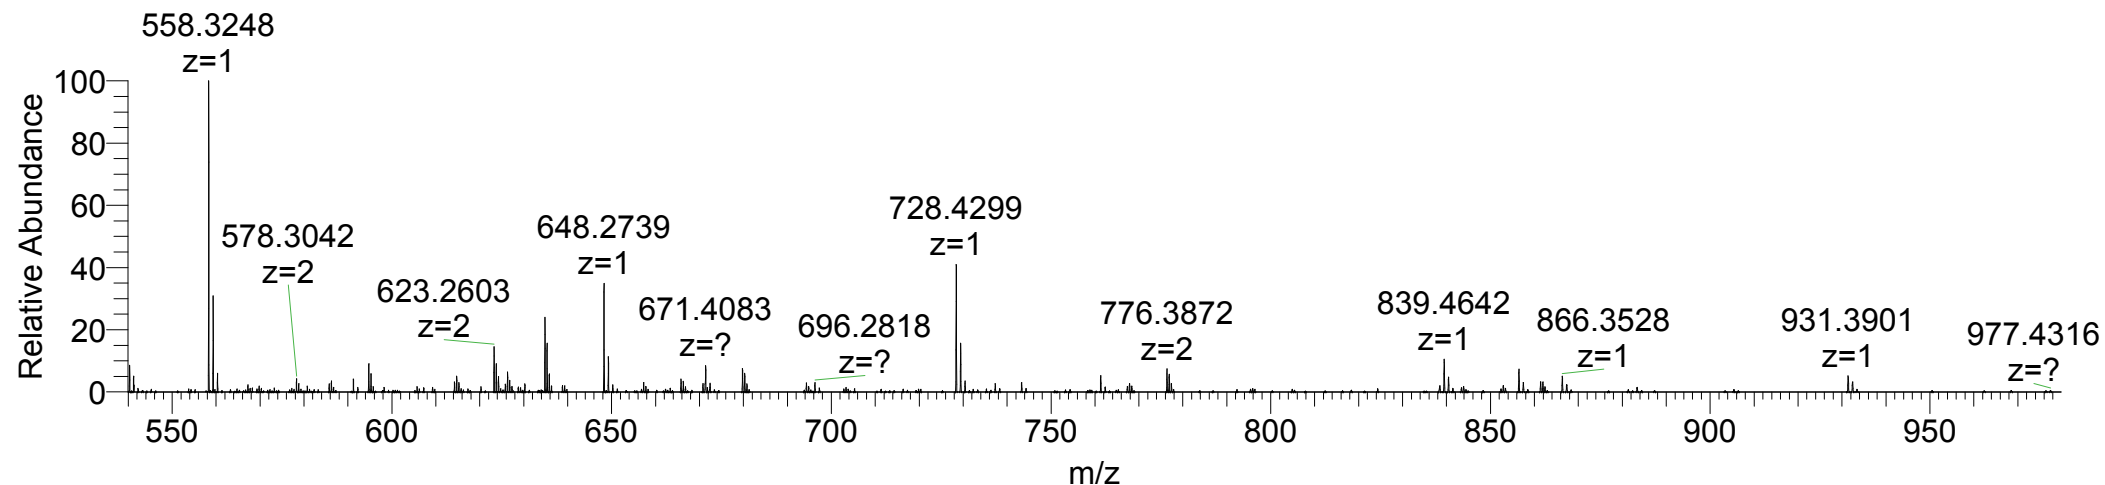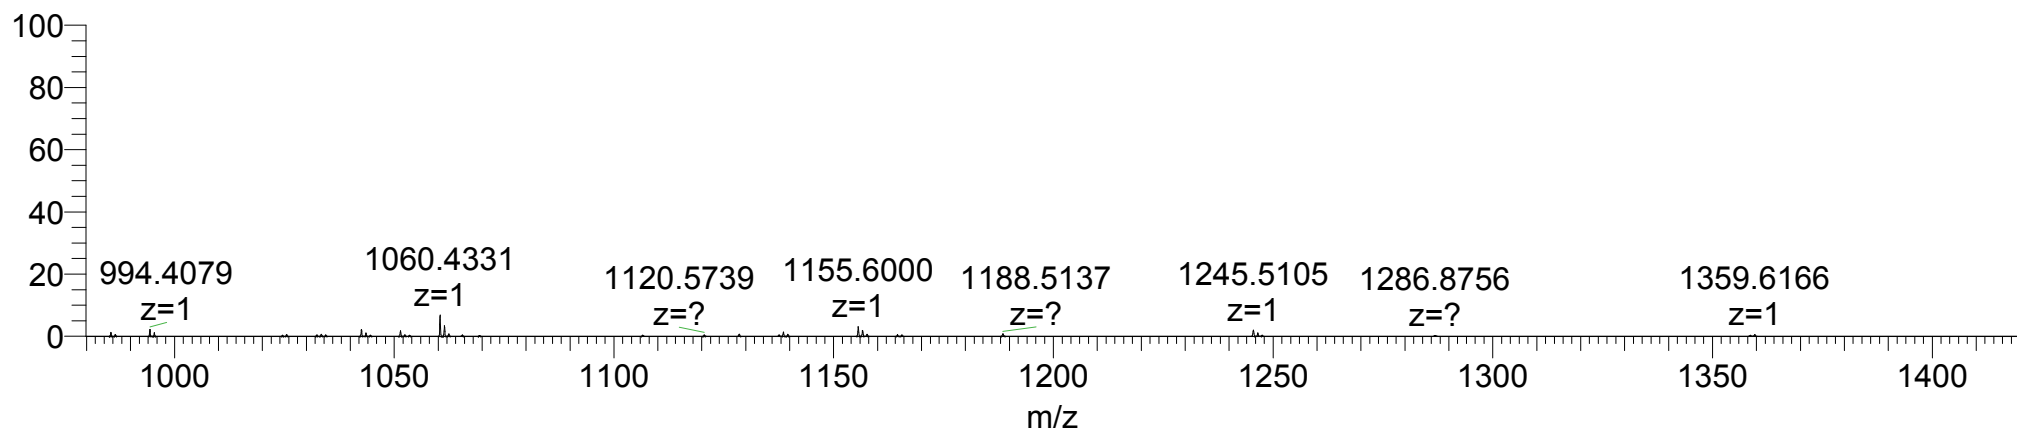

Bovine

30.

**P483-OH, P489-OH, P495-OH**

#474-497: AGKEGTKGDPGPAGLPGKDGPPGL

| Ion                       | charge state | Theoretical m/z (mono) | Experimental m/z (mono) | Mass error (Da) | Mass error (PPM) |
|---------------------------|--------------|------------------------|-------------------------|-----------------|------------------|
| [M+4H]+4OH+Gal.Glc        | 4            | 641.0580               | 641.0593                | 0.0052          | 2.0              |
| K                         | 1            | 129.1020               | 129.1022                | 0.0002          | 1.6              |
| PAG                       | 1            | 226.1186               | 226.1184                | -0.0002         | -0.9             |
| GPP+OH                    | 1            | 268.1292               | 268.1289                | -0.0003         | -1.1             |
| y3+OH                     | 1            | 302.1710               | 302.1711                | 0.0001          | 0.3              |
| PGPA+OH                   | 1            | 339.1663               | 339.1668                | 0.0005          | 1.5              |
| b4/PGKD-28+OH             | 1            | 386.2034               | 386.2042                | 0.0008          | 2.1              |
| y4+OH                     | 1            | 399.2238               | 399.2241                | 0.0003          | 0.8              |
| y9+2OH                    | 2            | 435.2218               | 435.2218                | 0.0000          | 0.0              |
| EGTKG-H2O+OH/<br>PGKDG+OH | 1            | 471.2198               | 471.2199                | 0.0001          | 0.2              |
| b11+2OH                   | 2            | 515.7436               | 515.7435                | -0.0002         | -0.2             |
| GKDGPP+OH                 | 1            | 568.2726               | 568.2725                | -0.0001         | -0.2             |
| b14+2OH                   | 2            | 628.2993               | 628.2982                | -0.0022         | -1.8             |
| y7+OH                     | 1            | 699.3672               | 699.3653                | -0.0019         | -2.7             |
| y8+OH                     | 1            | 756.3886               | 756.3893                | 0.0007          | 0.9              |
| b9+OH                     | 1            | 860.4108               | 860.4088                | -0.0020         | -2.3             |
| y9+2OH                    | 1            | 869.4363               | 869.4357                | -0.0006         | -0.7             |
| b11+2OH                   | 1            | 1030.4800              | 1030.4784               | -0.0016         | -1.6             |
| b14+2OH                   | 1            | 1255.5913              | 1255.5908               | -0.0005         | -0.4             |

\*Unlocalized sites: K476-OHGal.Glc?, K480-OH.Gal.Glc?

Pseudolocalized sites: K480-OH.Gal.Glc

4\_5\_2012Col5a1\_Chmy\_HCD1 #2646 RT: 17.52 AV: 1 NL: 3.43E5

T: FTMS + p NSI d Full ms2 641.31@hcd35.00 [115.00-2000.00]

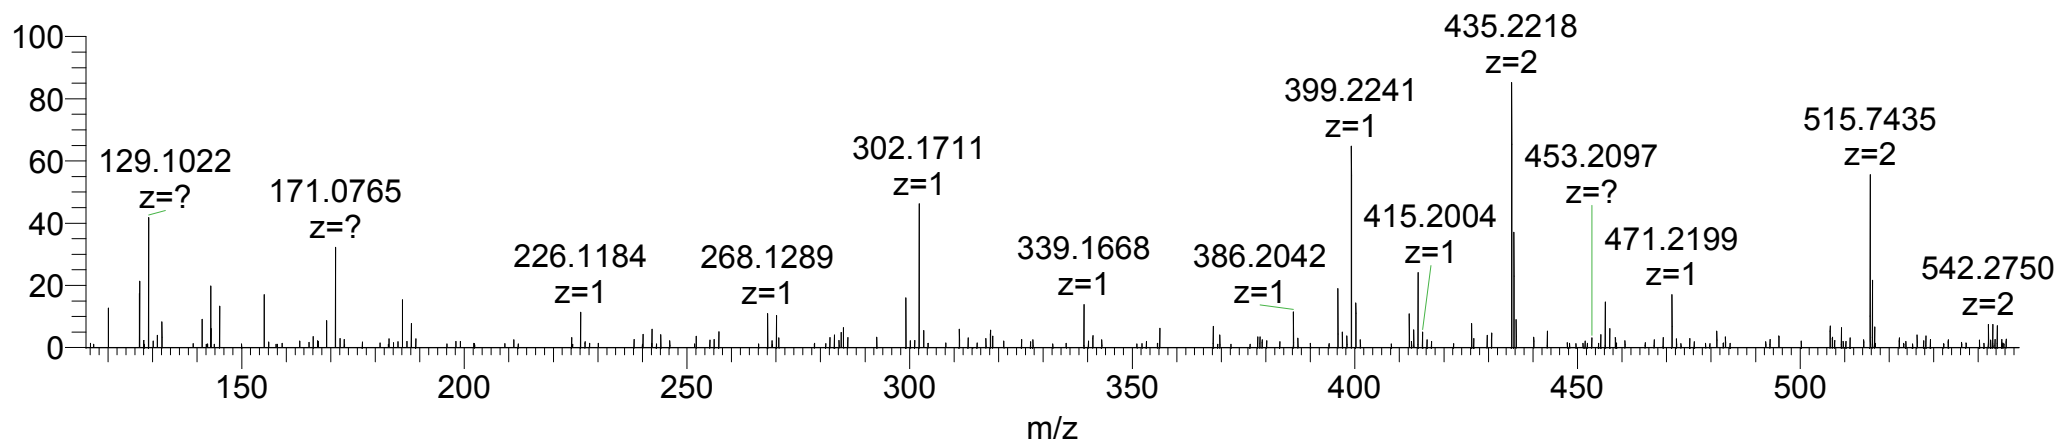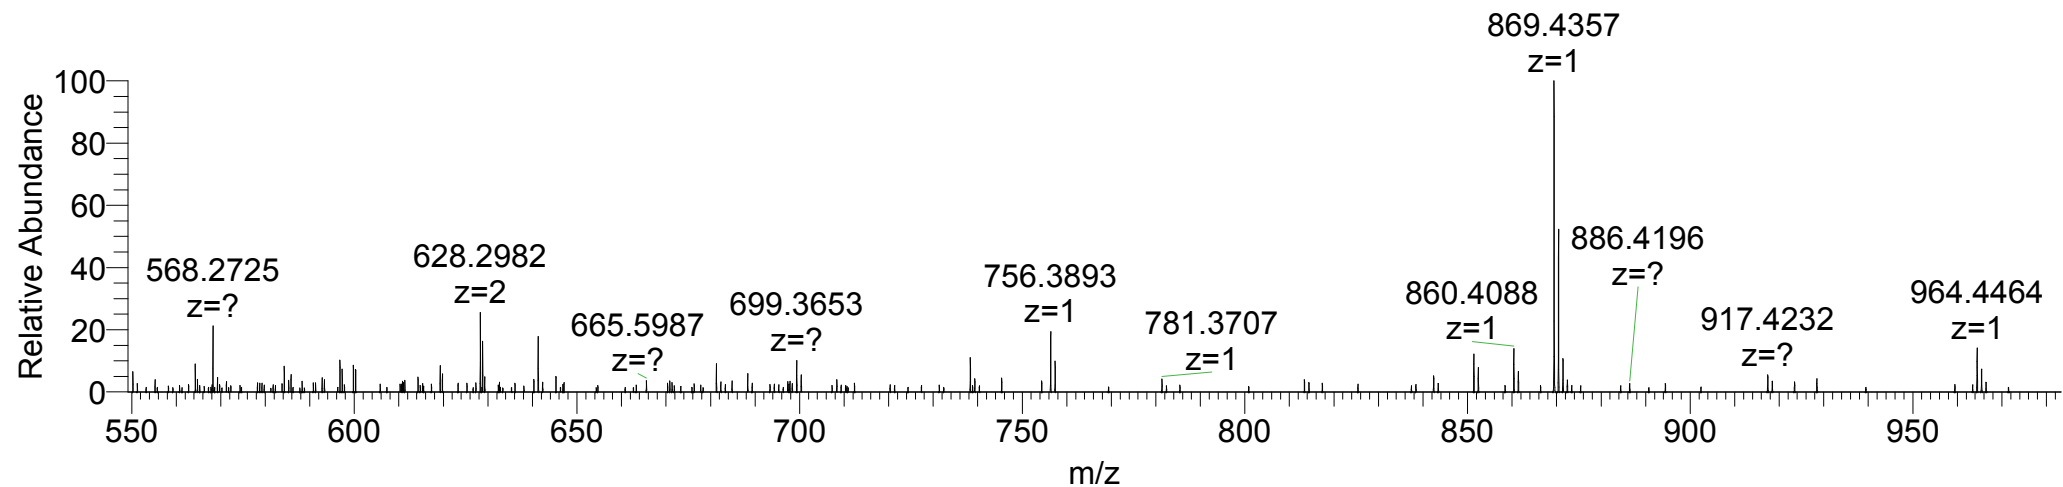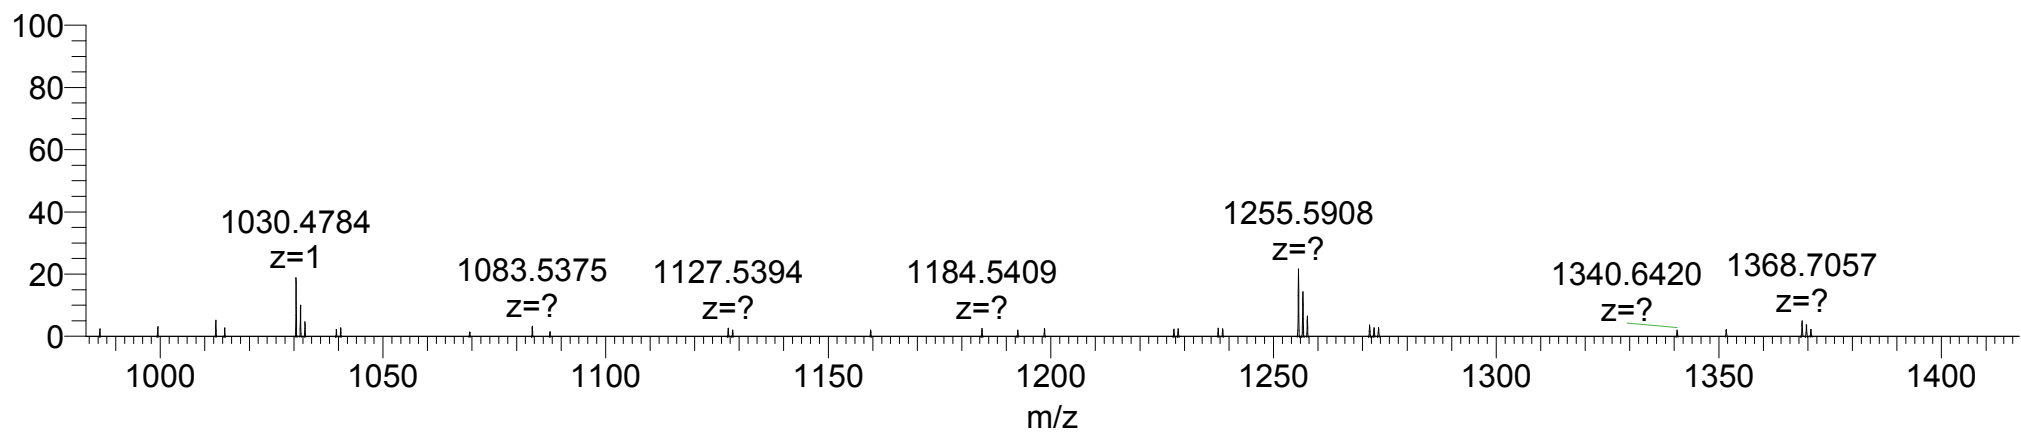

Bovine

31.

**K480-OH.Gal.Glc, P483-OH, P489-OH**

#477-491: EGTKGDPPGPAGLPGK

| Ion                | charge state | Theoretical m/z (mono) | Experimental m/z (mono) | Mass error (Da) | Mass error (PPM) |
|--------------------|--------------|------------------------|-------------------------|-----------------|------------------|
| [M+3H]+3OH+Gal.Glc | 3            | 584.9389               | 584.9410                | 0.0063          | 3.6              |
| y2                 | 1            | 204.1343               | 204.1346                | 0.0003          | 1.5              |
| y3+OH              | 1            | 317.1819               | 317.1824                | 0.0005          | 1.6              |
| y7+OH              | 2            | 328.1923               | 328.1927                | 0.0008          | 1.2              |
| y5+OH              | 1            | 487.2875               | 487.2880                | 0.0005          | 1.0              |
| y6+OH              | 1            | 558.3246               | 558.3255                | 0.0009          | 1.6              |
| b6-H2O+OH          | 1            | 586.2467               | 586.2427                | -0.0040         | -6.8             |
| y7+OH              | 1            | 655.3774               | 655.3779                | 0.0005          | 0.8              |
| b8-H2O+2OH         | 1            | 756.3159               | 756.3175                | 0.0016          | 2.1              |
| y9+2OH             | 1            | 825.4465               | 825.4487                | 0.0022          | 2.7              |
| y11+2OH            | 1            | 997.4949               | 997.4968                | 0.0019          | 1.9              |



2\_2\_2012Col5a1\_Bovine\_CE35\_HCD1 #8100 RT: 74.74 AV: 1 NL: 8.85E4

T: FTMS + p NSI d Full ms2 585.28@hcd35.00 [100.00-1770.00]

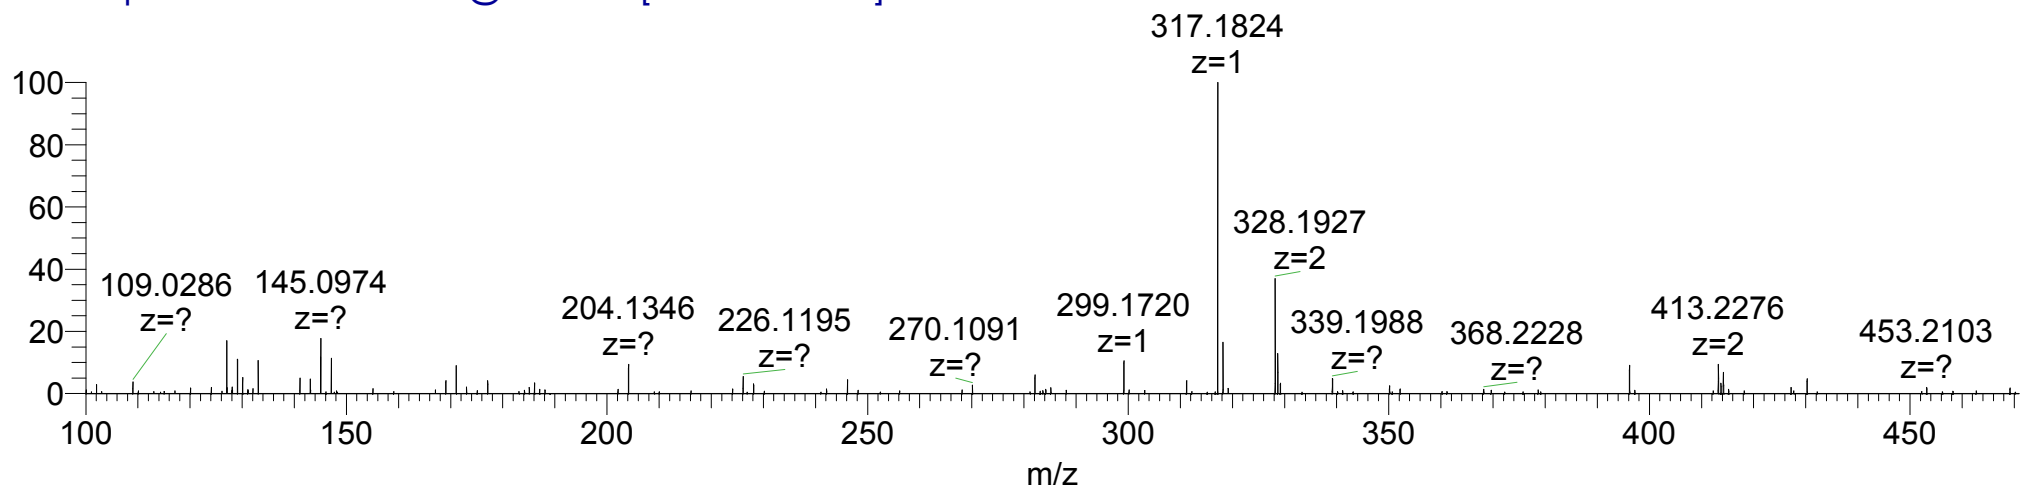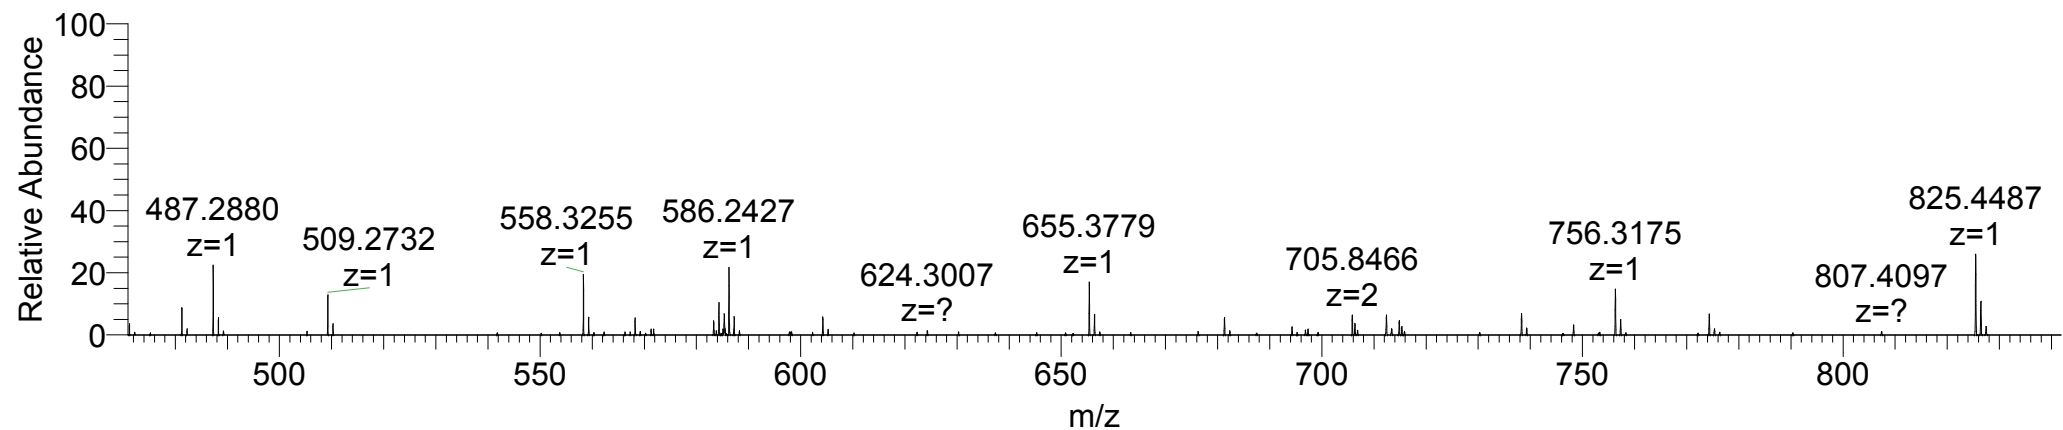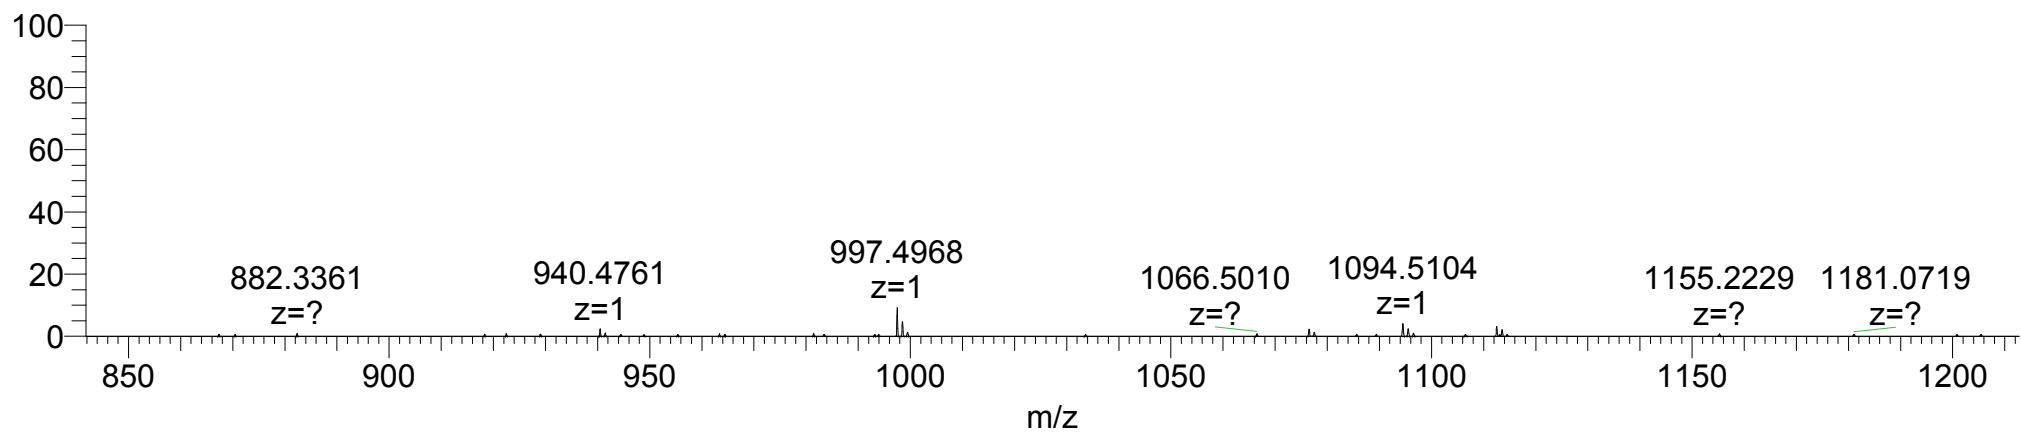

Bovine

**32.**

**P501-OH, P507-OH**

#498-515: RGFPGDRGLPGPVGALGL

| Ion        | charge state | Theoretical m/z (mono) | Experimental m/z (mono) | Mass error (Da) | Mass error (PPM) |
|------------|--------------|------------------------|-------------------------|-----------------|------------------|
| [M+3H]+2OH | 3            | 589.9882               | 589.9886                | 0.0012          | 0.7              |
| y1         | 1            | 132.1019               | 132.1019                | 0.0000          | 0.0              |
| y2         | 1            | 189.1234               | 189.1234                | 0.0000          | 0.0              |
| y3         | 1            | 302.2074               | 302.2070                | -0.0004         | -1.3             |
| a9+OH      | 2            | 472.7567               | 472.7563                | -0.0008         | -0.8             |
| b11+2OH    | 2            | 571.7887               | 571.7888                | 0.0002          | 0.2              |
| b6+OH      | 1            | 646.2944               | 646.2930                | -0.0014         | -2.2             |
| a13+2OH    | 2            | 655.8518               | 655.8519                | 0.0002          | 0.2              |
| b13+2OH    | 2            | 669.8493               | 669.8484                | -0.0018         | -1.3             |
| b14+2OH    | 2            | 698.3600               | 698.3604                | 0.0008          | 0.6              |
| a15+2OH    | 2            | 719.8811               | 719.8813                | 0.0004          | 0.3              |
| b15+2OH    | 2            | 733.8786               | 733.8800                | 0.0028          | 1.9              |
| a16+2OH    | 2            | 776.4232               | 776.4236                | 0.0008          | 0.5              |
| b17+2OH    | 2            | 818.9313               | 818.9321                | 0.0016          | 1.0              |
| b9-NH3+OH  | 1            | 955.4744               | 955.4749                | 0.0005          | 0.5              |

4\_5\_2012Col5a1\_Chmy\_HCD1 #8506 RT: 54.09 AV: 1 NL: 8.57E5

T: FTMS + p NSI d Full ms2 590.32@hcd35.00 [115.00-1785.00]

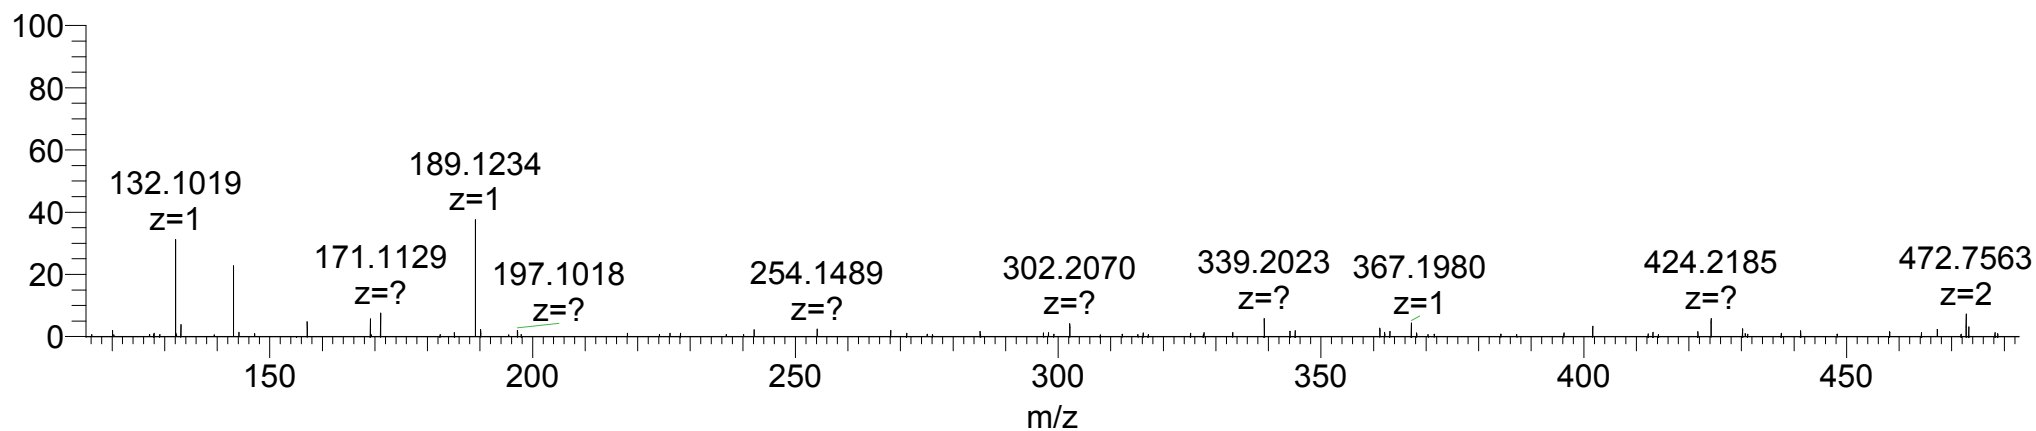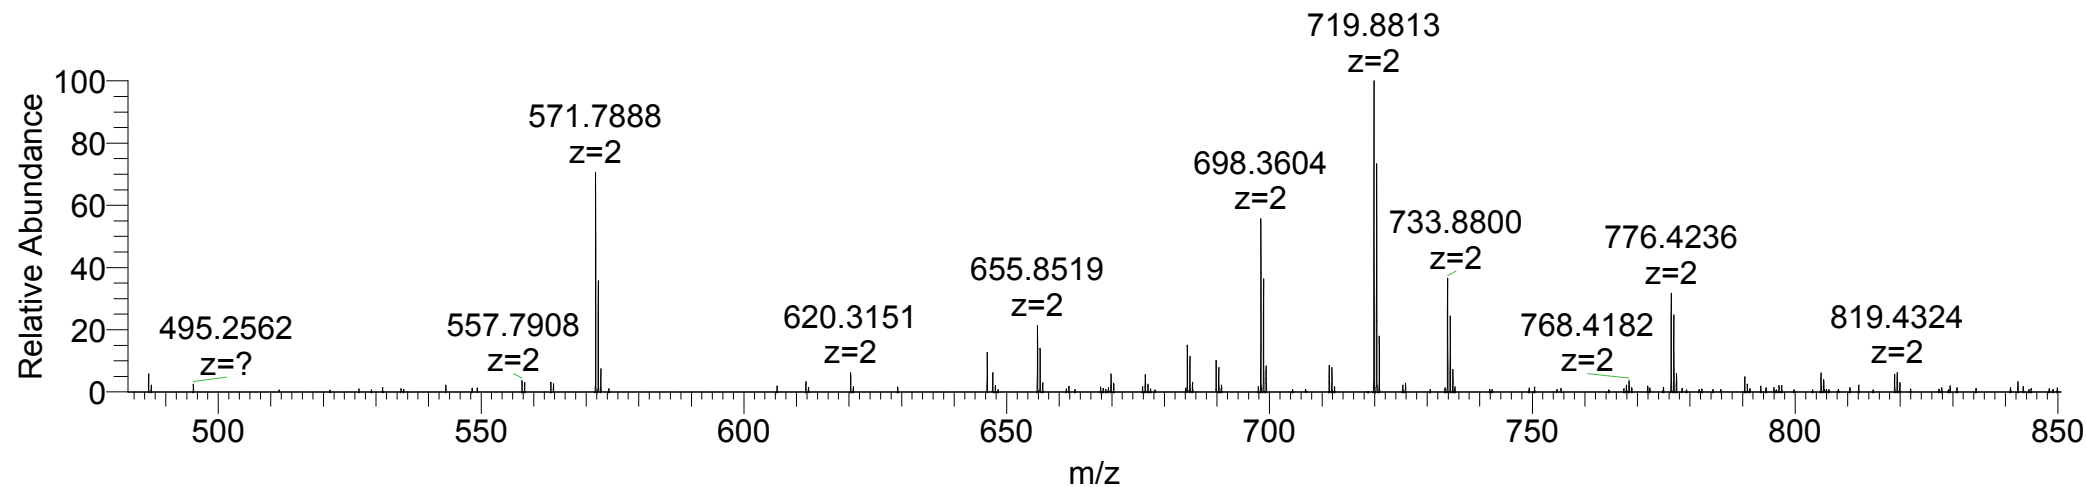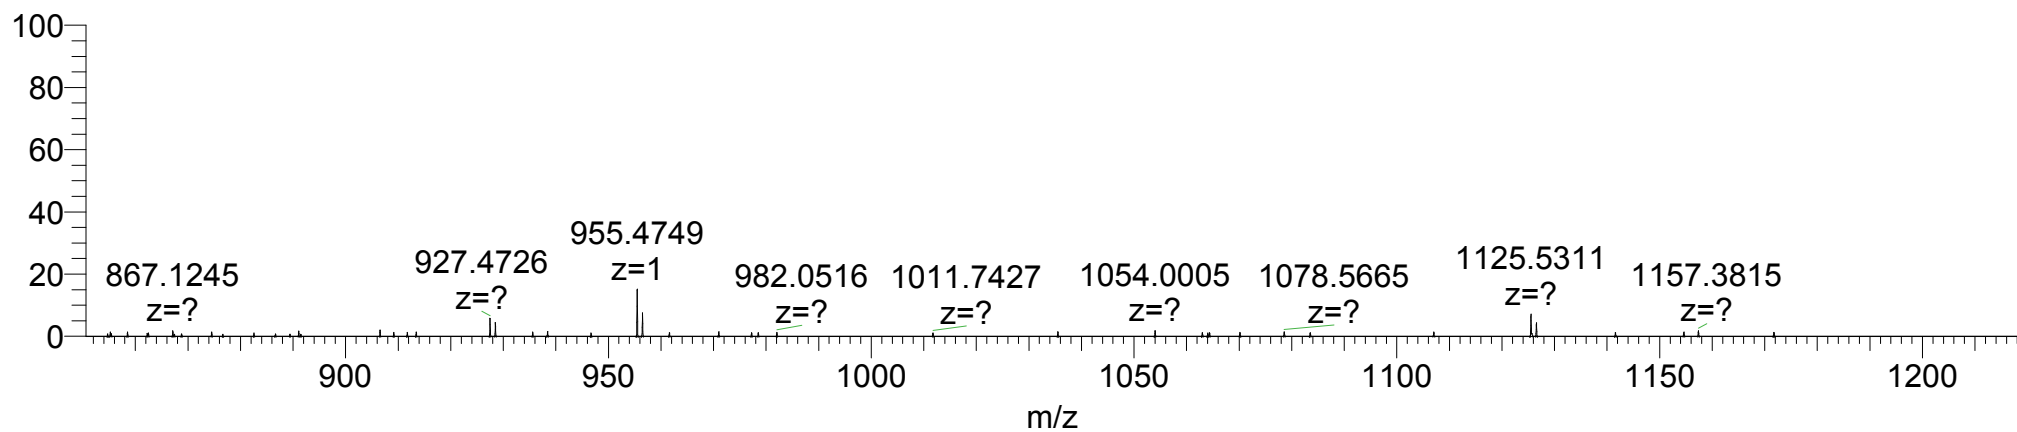

Bovine

33.

**K516-OH.Gal.Glc, P521-OH, P522-OH, P524-OH, P525-OH, P531-OH**

#505-534: GLPGPVGALGLKGSEGPPGPPGPAGSPGER

| Ion                | charge state | Theoretical m/z (mono) | Experimental m/z (mono) | Mass error (Da) | Mass error (PPM) |
|--------------------|--------------|------------------------|-------------------------|-----------------|------------------|
| [M+4H]+7OH+Gal.Glc | 4            | 775.3717               | 775.3750                | 0.0132          | 4.3              |
| a2/LG-28           | 1            | 143.1179               | 143.1184                | 0.0005          | 3.5              |
| PG+OH              | 1            | 171.0764               | 171.0770                | 0.0006          | 3.5              |
| y4+OH              | 2            | 237.6190               | 237.6198                | 0.0016          | 3.4              |
| GPP+2OH            | 1            | 284.1241               | 284.1250                | 0.0009          | 3.2              |
| PGPV-28+OH         | 1            | 339.2027               | 339.2036                | 0.0009          | 2.7              |
| y8+OH              | 2            | 393.6907               | 393.6923                | 0.0032          | 4.1              |
| y4+OH              | 1            | 474.2307               | 474.2322                | 0.0015          | 3.2              |
| y11+3OH            | 2            | 535.2491               | 535.2505                | 0.0028          | 2.6              |
| y6+OH              | 1            | 618.2842               | 618.2842                | 0.0000          | 0.0              |
| y7+OH              | 1            | 689.3213               | 689.3235                | 0.0022          | 3.2              |
| y8+OH              | 1            | 786.3741               | 786.3766                | 0.0025          | 3.2              |
| y9+OH              | 1            | 843.3955               | 843.3978                | 0.0023          | 2.7              |
| y10+2OH            | 1            | 956.4432               | 956.4470                | 0.0038          | 4.0              |
| y11+3OH            | 1            | 1069.4909              | 1069.4906               | -0.0003         | -0.3             |
| y12+3OH            | 1            | 1126.5123              | 1126.5148               | 0.0025          | 2.2              |
| y13+4OH            | 1            | 1239.5600              | 1239.5609               | 0.0009          | 0.7              |
| y15+5OH            | 1            | 1409.6292              | 1409.6344               | 0.0052          | 3.7              |

2\_2\_2012Col5a1\_Bovine\_CE35\_HCD1 #3149 RT: 29.42 AV: 1 NL: 1.80E5

T: FTMS + p NSI d Full ms2 775.37@hcd35.00 [100.00-2000.00]

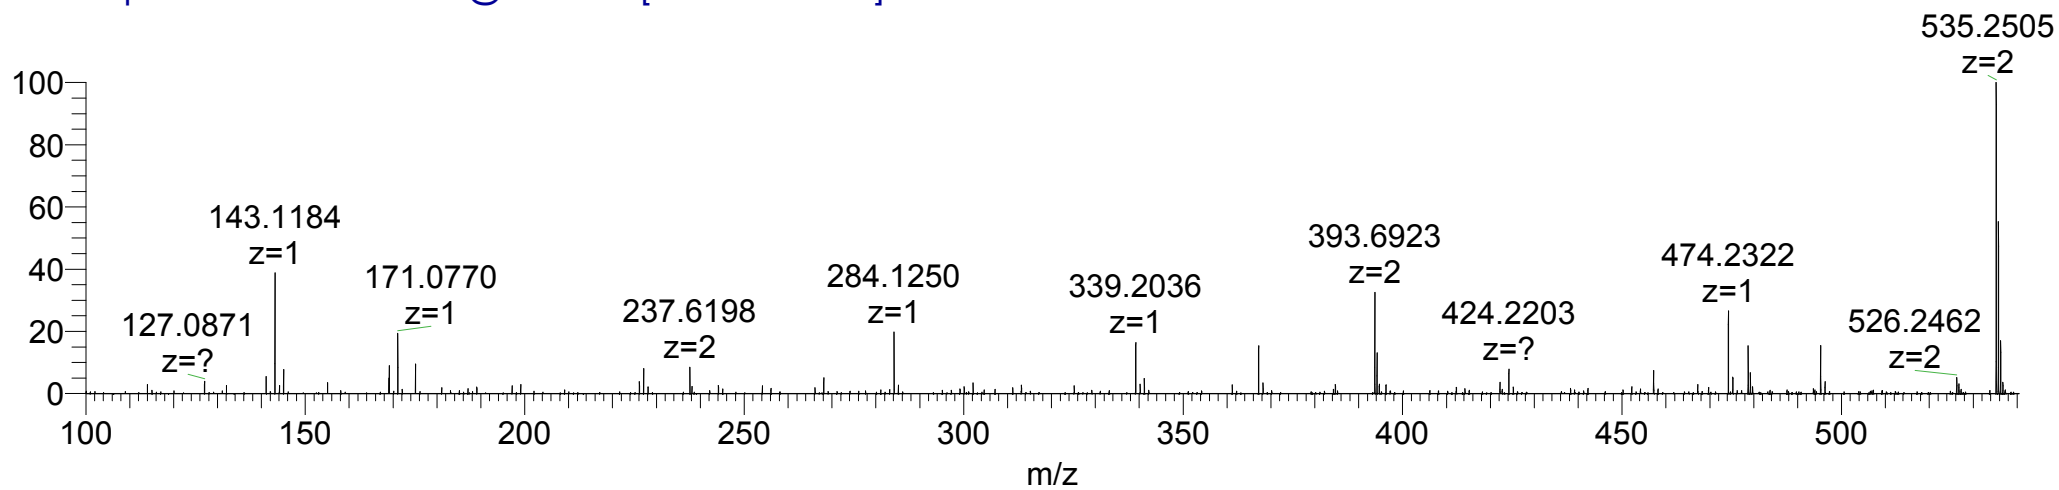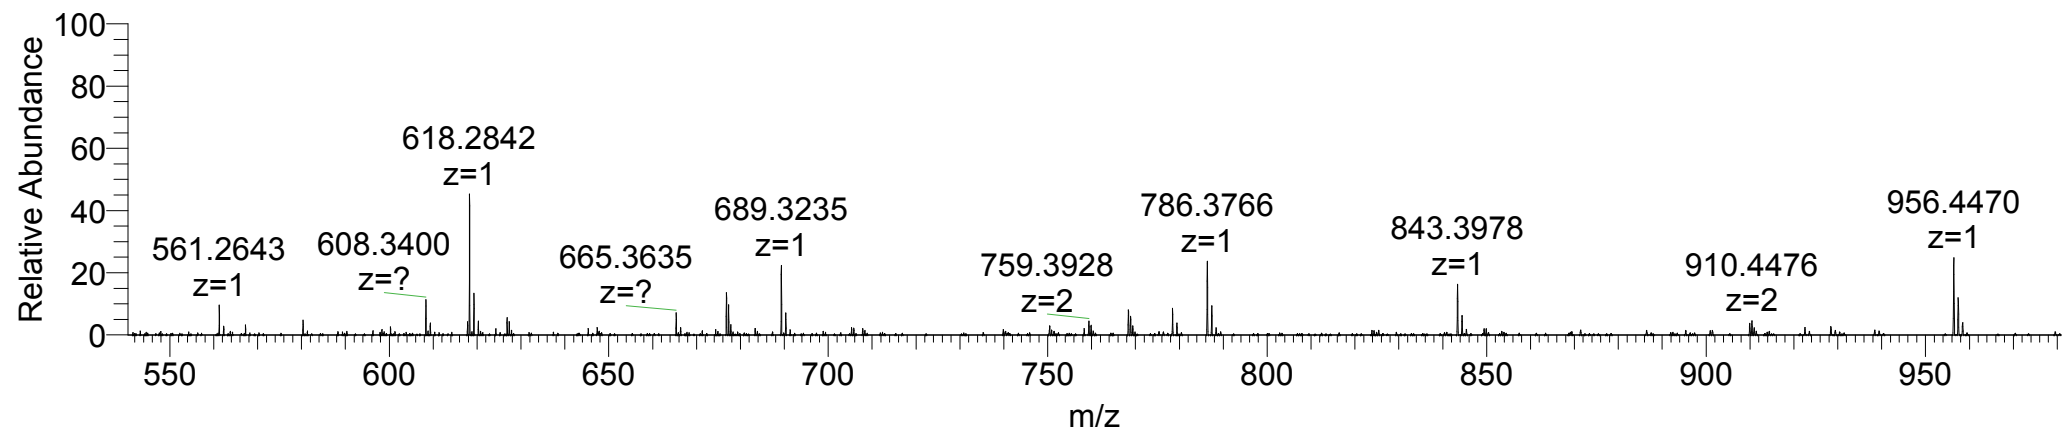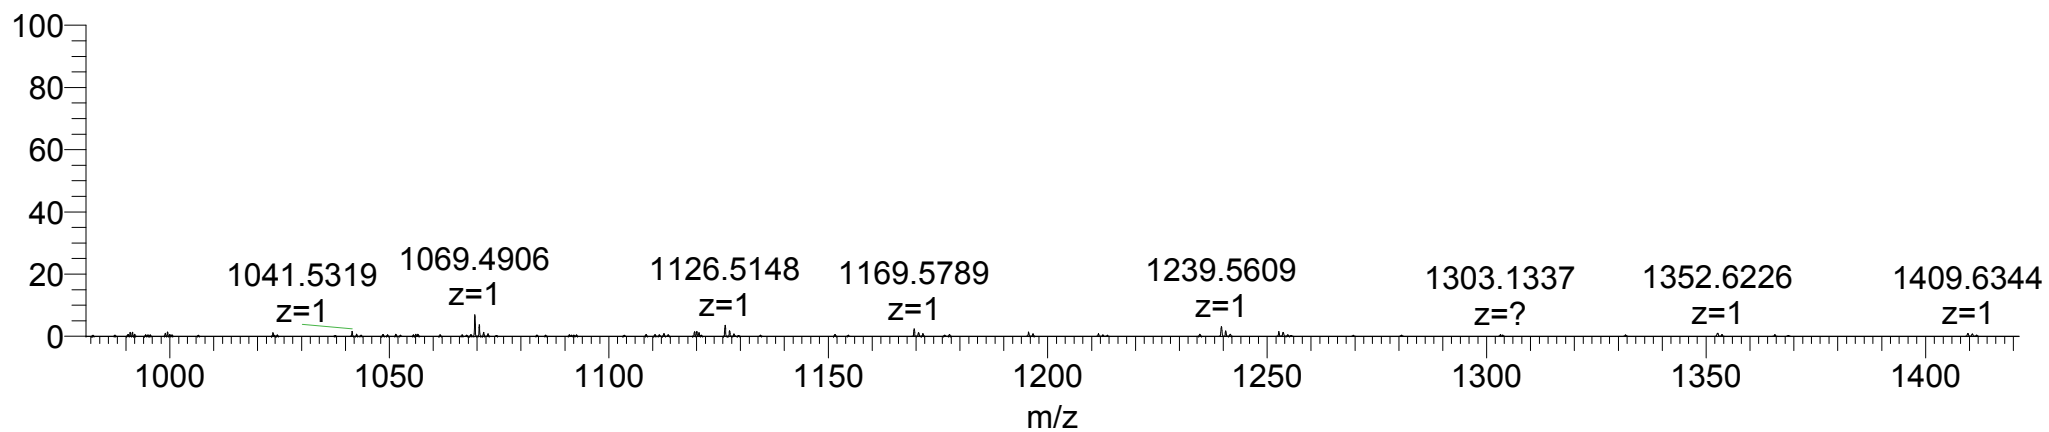

Bovine

34.

P507-OH, P509-OH, K516-OH.Gal.Glc, P522-OH, P524-OH, P525-OH, P531-OH

#505-534: GLPGPVGALGLLKGSEGPPGPPGPAGSPGER

| Ion                     | charge state | Theoretical m/z (mono) | Experimental m/z (mono) | Mass error (Da) | Mass error (PPM) |
|-------------------------|--------------|------------------------|-------------------------|-----------------|------------------|
| [M+4H]+7OH+Gal.Glc      | 4            | 775.3717               | 775.3749                | 0.0128          | 4.1              |
| a2/LG-28                | 1            | 143.1179               | 143.1181                | 0.0002          | 1.4              |
| y4+OH                   | 2            | 237.6190               | 237.6194                | 0.0008          | 1.7              |
| EGP/GPP+2OH             | 1            | 284.1241               | 284.1244                | 0.0003          | 1.1              |
| PGPV-28+2OH             | 1            | 355.1976               | 355.1976                | 0.0000          | 0.0              |
| PGPV+2OH                | 1            | 383.1925               | 383.1924                | -0.0001         | -0.3             |
| y8+OH                   | 2            | 393.6907               | 393.6912                | 0.0010          | 1.3              |
| y10+2OH                 | 2            | 478.7252               | 478.7258                | 0.0012          | 1.3              |
| PGPVGA+2OH              | 1            | 511.2511               | 511.2491                | -0.0020         | -3.9             |
| y11+3OH                 | 2            | 535.2491               | 535.2492                | 0.0002          | 0.2              |
| y5+OH                   | 1            | 561.2627               | 561.2620                | -0.0007         | -1.2             |
| y6+OH                   | 1            | 618.2842               | 618.2840                | -0.0002         | -0.3             |
| y14+4OH                 | 2            | 668.8100               | 668.8109                | 0.0018          | 1.3              |
| b8+2OH/<br>PGPVGALG+2OH | 1            | 681.3566               | 681.3574                | 0.0008          | 1.2              |
| y7+OH                   | 1            | 689.3213               | 689.3212                | -0.0001         | -0.1             |
| y8+OH                   | 1            | 786.3741               | 786.3737                | -0.0004         | -0.5             |
| y9+OH                   | 1            | 843.3955               | 843.3959                | 0.0004          | 0.5              |
| y10+2OH                 | 1            | 956.4432               | 956.4438                | 0.0006          | 0.6              |
| y11+3OH                 | 1            | 1069.4909              | 1069.4924               | 0.0015          | 1.4              |
| y12+3OH                 | 1            | 1126.5123              | 1126.5132               | 0.0009          | 0.8              |
| y13+4OH                 | 1            | 1239.5600              | 1239.5618               | 0.0018          | 1.5              |

2\_2\_2012Col5a1\_Bovine\_CE35\_HCD1 #2835 RT: 26.65 AV: 1 NL: 7.67E4

T: FTMS + p NSI d Full ms2 775.62@hcd35.00 [100.00-2000.00]

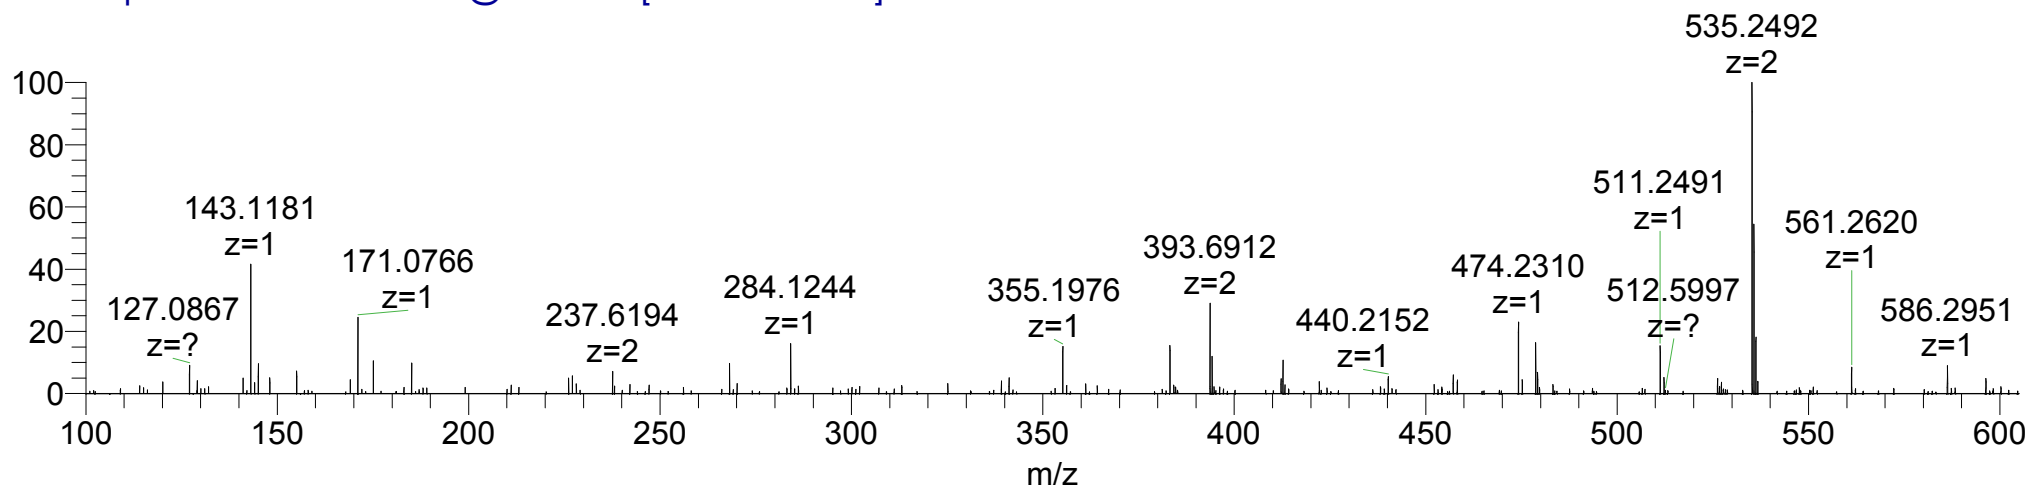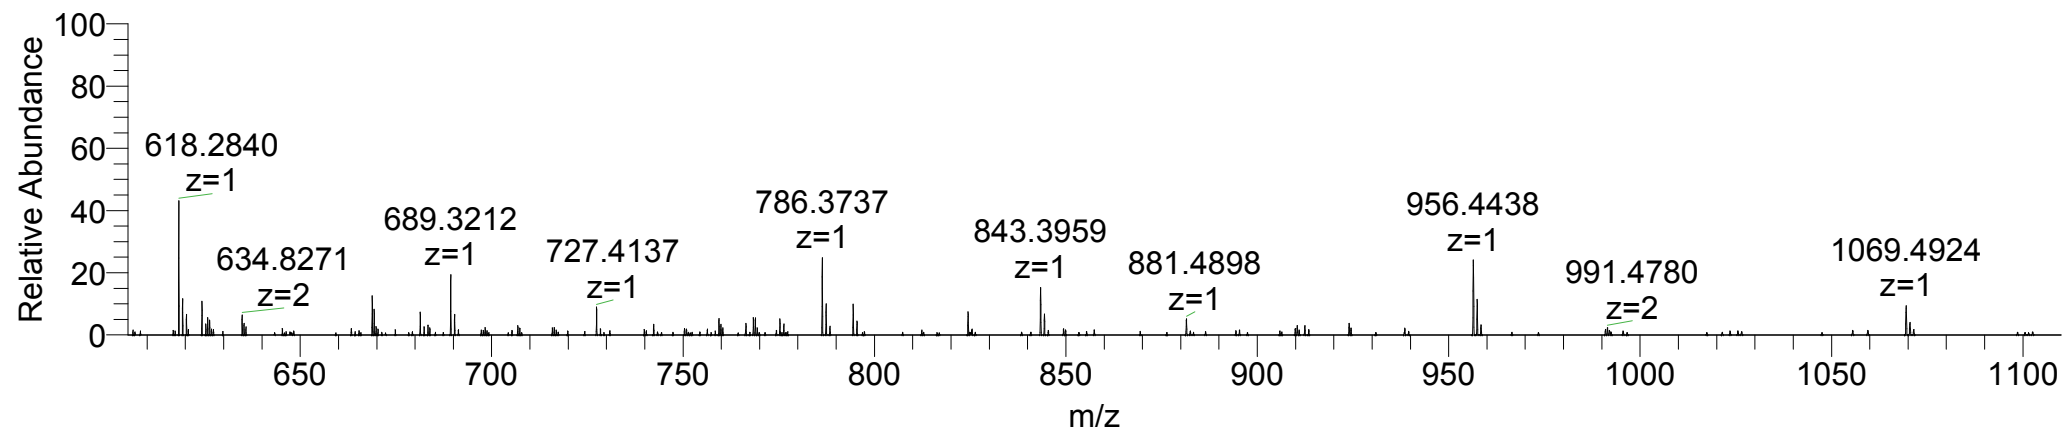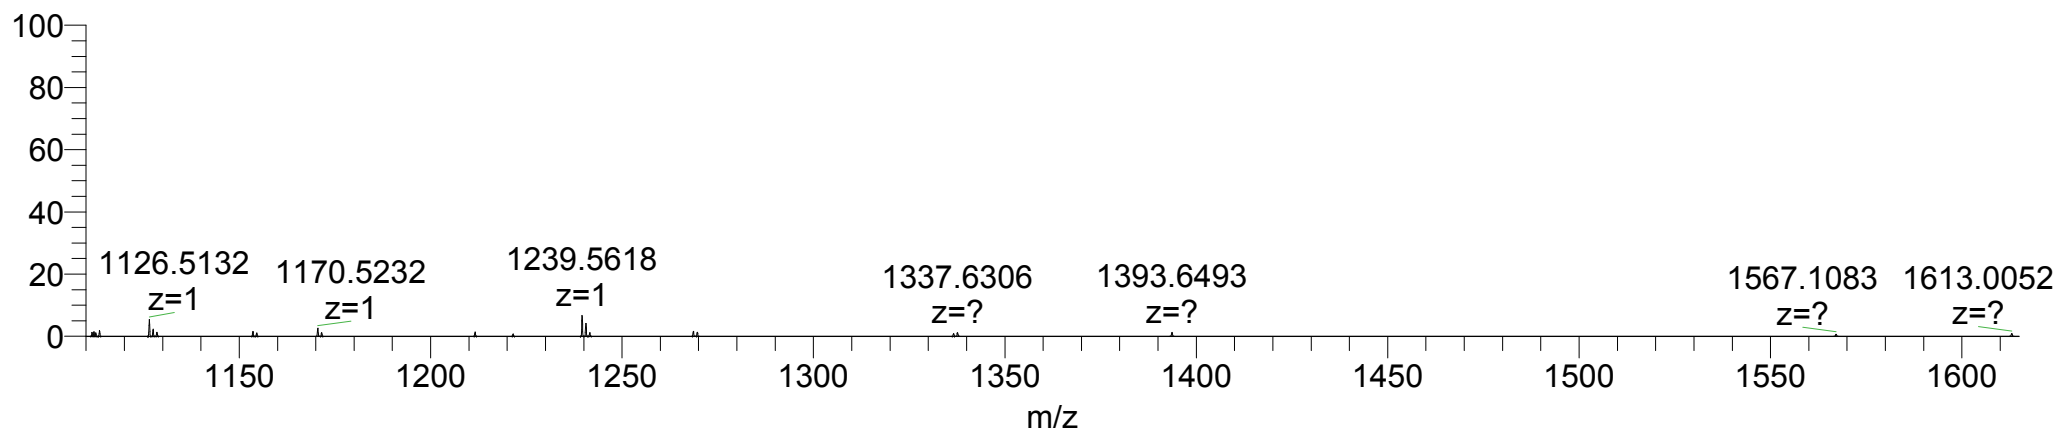

Bovine

35.

**P546-OH, K561-OH.Gal.Glc**

#535-567: GPAGAAGPIGIPGRPGPQQGPPGPAGEKKGAPGEK

MS<sup>2</sup>: GPAGAAGPIGIPGRPGPQQGPPGPAGEKKGAPGEK

| Ion                           | charge state | Theoretical m/z (mono) | Experimental m/z (mono) | Mass error (Da) | Mass error (PPM) |
|-------------------------------|--------------|------------------------|-------------------------|-----------------|------------------|
| [M+4H]+4OH+Gal.Glc            | 4            | 822.6561               | 822.6582                | 0.0084          | 2.6              |
| b5/GAAGP                      | 1            | 354.1772               | 354.1787                | 0.0015          | 4.2              |
| PAGAAG/b6/<br>PGPQG-28+OH     | 1            | 425.2143               | 425.2159                | 0.0016          | 3.8              |
| b7                            | 1            | 482.2358               | 482.2373                | 0.0015          | 3.1              |
| y6                            | 1            | 558.2882               | 558.2905                | 0.0023          | 4.1              |
| y22+4OH                       | 3            | 701.3469               | 701.3498                | 0.0087          | 4.1              |
| [M+4H]+4OH (MS <sup>3</sup> ) | 4            | 741.6297               | 741.6335                | 0.0152          | 5.1              |
| [M+4H]+4OH+Gal                | 4            | 782.1429               | 782.1462                | 0.0132          | 4.2              |
| y26+4OH                       | 3            | 828.0943               | 828.0978                | 0.0105          | 4.2              |
| y27+4OH                       | 3            | 847.1015               | 847.1038                | 0.0069          | 2.7              |
| b11                           | 1            | 862.4781               | 862.4808                | 0.0027          | 3.1              |
| y24+4OH+Gal.Glc               | 3            | 866.0839               | 866.0864                | 0.0075          | 2.9              |
| y26+4OH+Gal                   | 3            | 882.1120               | 882.1132                | 0.0036          | 1.4              |
| y27+4OH+Gal                   | 3            | 901.1191               | 901.1184                | -0.0021         | -0.8             |
| y26+4OH+Gal.Glc               | 3            | 936.1296               | 936.1336                | 0.0120          | 4.3              |
| y27+4OH+Gal.Glc               | 3            | 955.1367               | 955.1392                | 0.0075          | 2.6              |
| y28+4OH+Gal.Glc               | 3            | 978.8158               | 978.8158                | 0.0000          | 0.0              |
| [M+3H]+4OH                    | 3            | 988.5038               | 988.5079                | 0.0123          | 4.2              |
| y22+4OH                       | 2            | 1051.5167              | 1051.5206               | 0.0078          | 3.7              |
| y24+4OH                       | 2            | 1136.5695              | 1136.5730               | 0.0070          | 3.1              |
| y27+4OH                       | 2            | 1270.1486              | 1270.1555               | 0.0138          | 5.4              |

MS<sup>3</sup>: GPAGAAGPIGIPGRPGPQQGPPGPAGEKKGAPGEK

| Ion                | charge state | Theoretical m/z (mono) | Experimental m/z (mono) | Mass error (Da) | Mass error (PPM) |
|--------------------|--------------|------------------------|-------------------------|-----------------|------------------|
| PIG                | 1            | 268.1656               | 268.1660                | 0.0004          | 1.5              |
| a5/GAAGP-28        | 1            | 326.1823               | 326.1833                | 0.0010          | 3.1              |
| b5/GAAGP           | 1            | 354.1772               | 354.1779                | 0.0007          | 2.0              |
| b6/<br>PGPQG-28+OH | 1            | 425.2143               | 425.2144                | 0.0001          | 0.2              |
| b7                 | 1            | 482.2358               | 482.2363                | 0.0005          | 1.0              |
| AGPIGI             | 1            | 509.3082               | 509.3084                | 0.0002          | 0.4              |
| y6                 | 1            | 558.2882               | 558.2892                | 0.0010          | 1.8              |
| y22+4OH            | 3            | 701.3469               | 701.3477                | 0.0024          | 1.1              |
| [M+4H]+4OH         | 4            | 741.6297               | 741.6311                | 0.0056          | 1.9              |



Bovine

| Ion     | charge state | Theoretical m/z (mono) | Experimental m/z (mono) | Mass error (Da) | Mass error (PPM) |
|---------|--------------|------------------------|-------------------------|-----------------|------------------|
| y24+4OH | 3            | 758.0487               | 758.0489                | 0.0006          | 0.3              |
| y26+4OH | 3            | 828.0943               | 828.0950                | 0.0021          | 0.8              |
| y27+4OH | 3            | 847.1015               | 847.1031                | 0.0048          | 1.9              |
| y19+3OH | 2            | 888.4316               | 888.4390                | 0.0148          | 8.3              |
| b22+3OH | 2            | 954.4898               | 954.4960                | 0.0124          | 6.5              |
| y22+4OH | 2            | 1051.5167              | 1051.5188               | 0.0042          | 2.0              |
| y24+4OH | 2            | 1136.5695              | 1136.5714               | 0.0038          | 1.7              |

**\*Unlocalized sites: P549-OH?, P551-OH?, P554-OH?, P555-OH?**

**Pseudolocalized sites: P549-OH, P555-OH**

2\_2\_2012Col5a1\_Bovine\_Top5MS3 #1770 RT: 20.79 AV: 1 NL: 1.77E5

T: FTMS + p NSI d Full ms2 823.16@cid35.00 [215.00-2000.00]

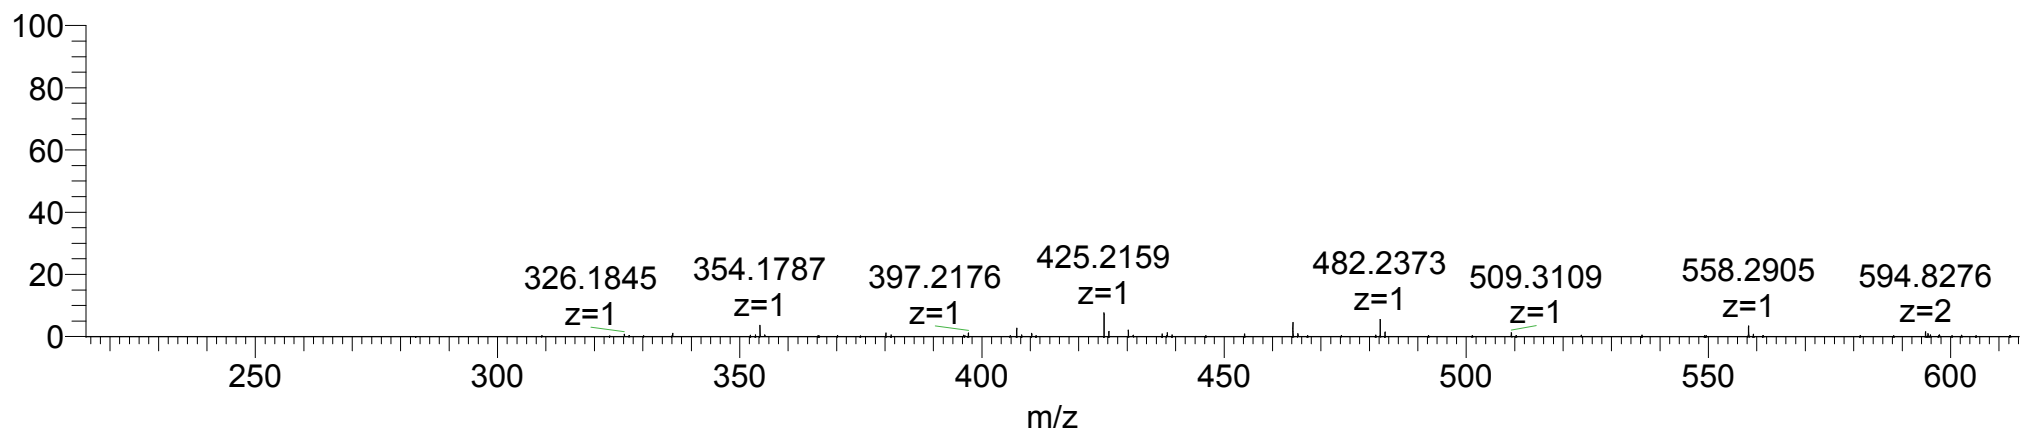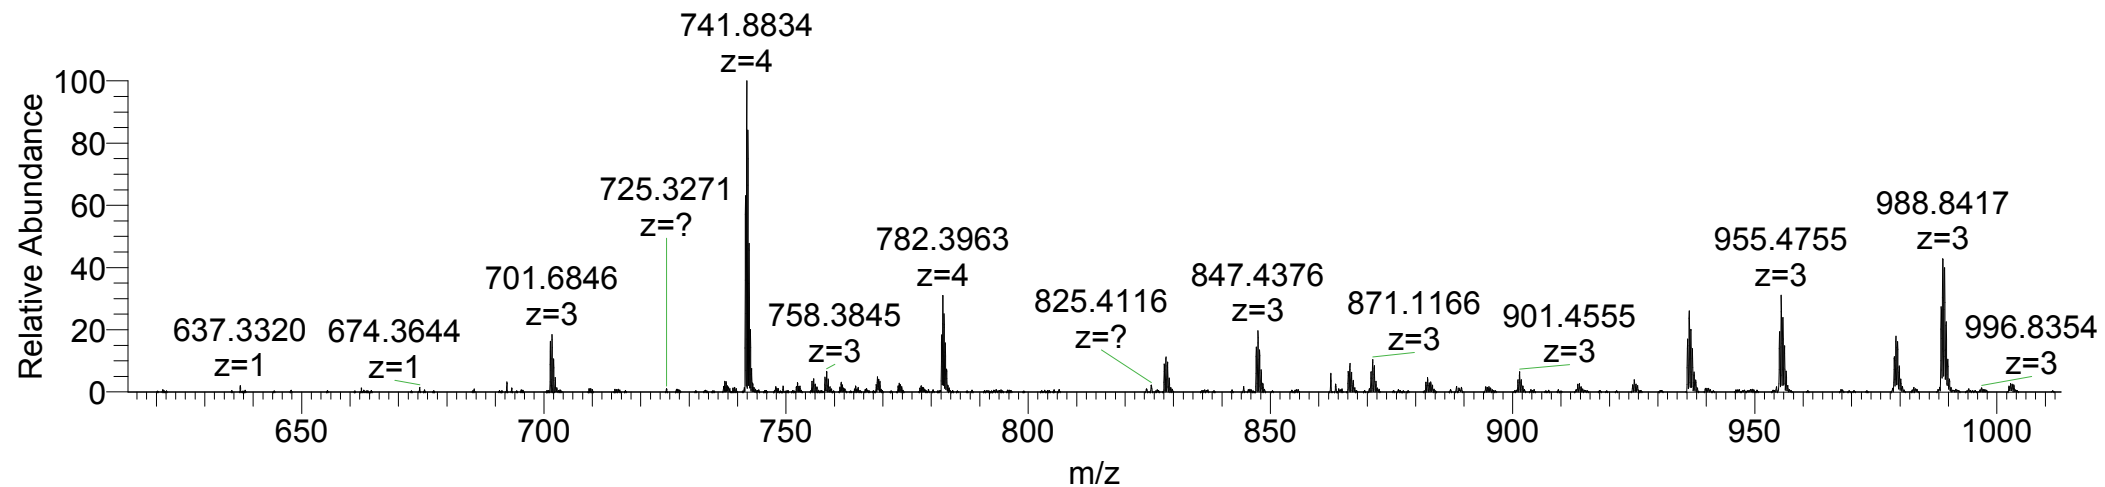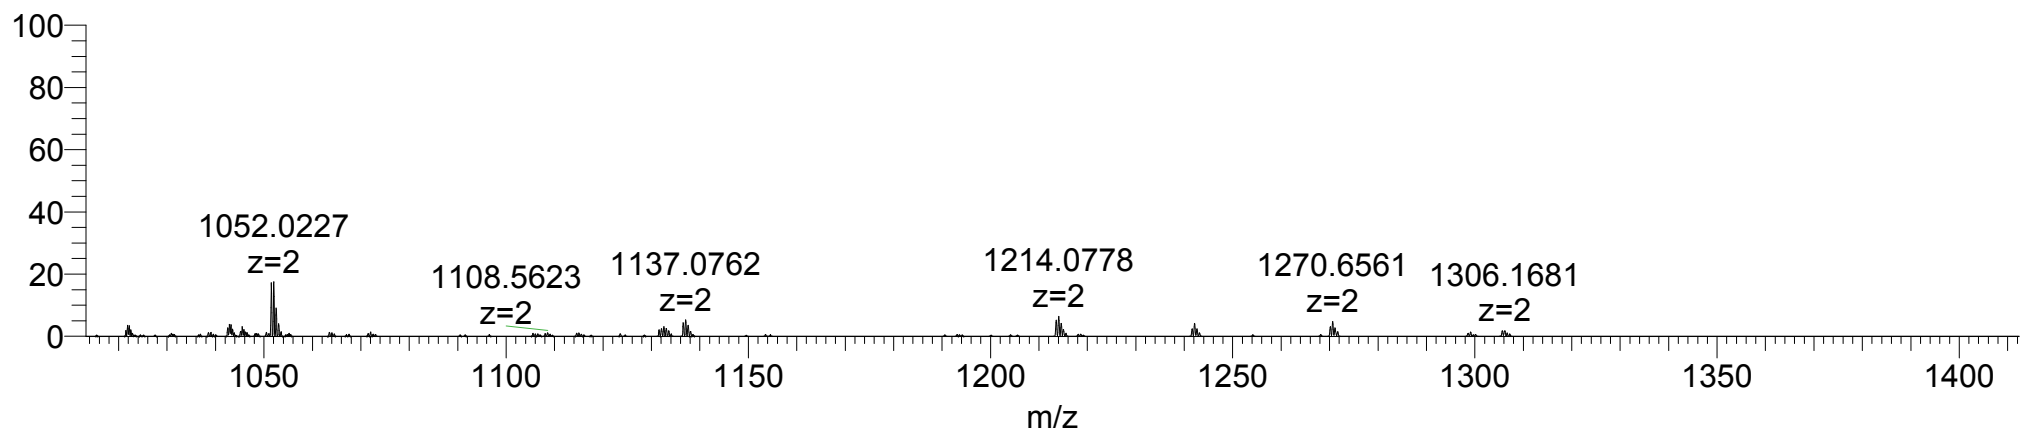

2\_2\_2012Col5a1\_Bovine\_Top5MS3 #1771 RT: 20.80 AV: 1 NL: 5.57E4  
T: FTMS + p NSI d Full ms3 823.16@cid35.00 741.88@hcd30.00 [100.00-2000.00]

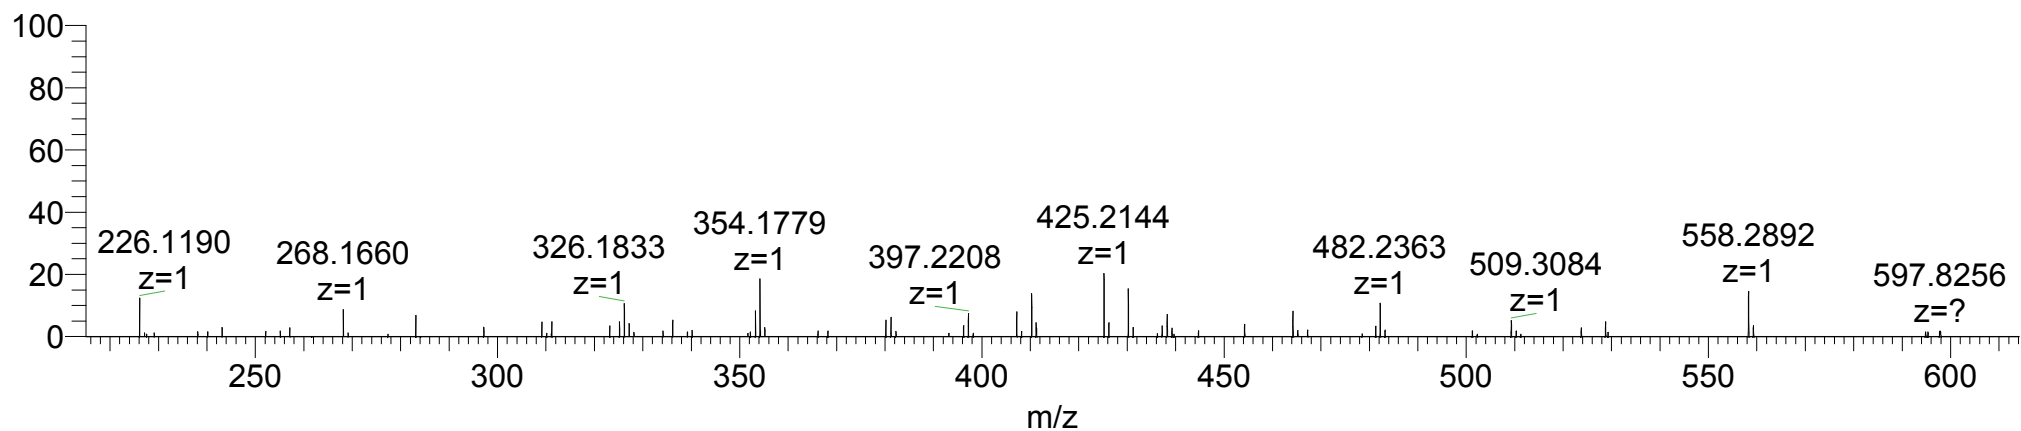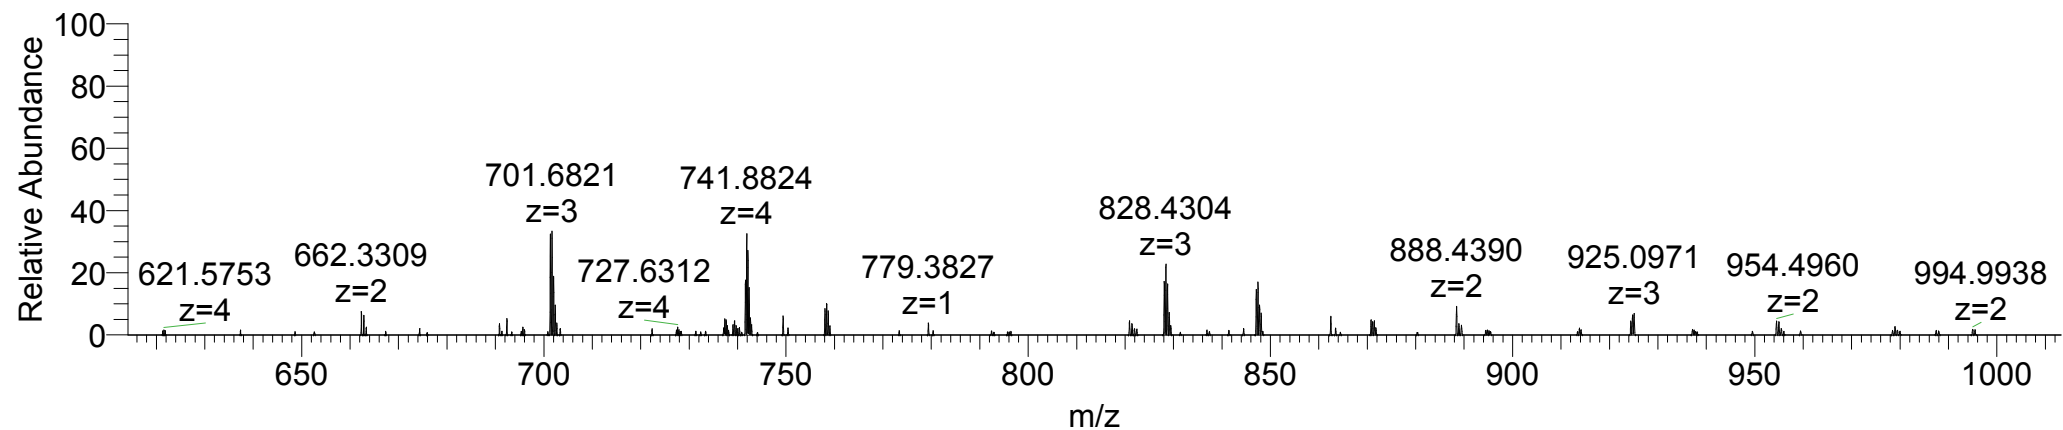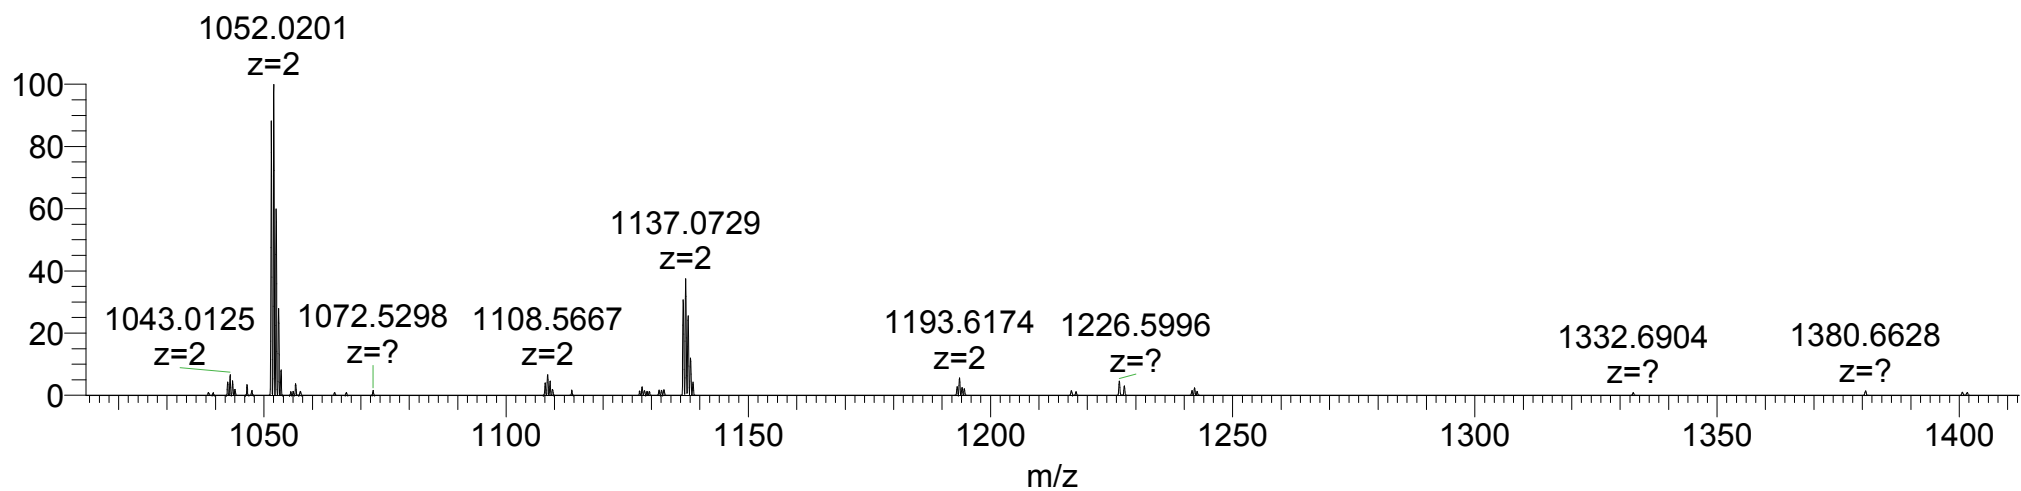

Bovine

36.

**K561-OH, P564-OH, K567-OH**

#561-575: KGAPGEKGPGQPAGR

| Ion                | charge state | Theoretical m/z (mono) | Experimental m/z (mono) | Mass error (Da) | Mass error (PPM) |
|--------------------|--------------|------------------------|-------------------------|-----------------|------------------|
| [M+3H]+3OH+Gal.Glc | 3            | 593.6183               | 593.6183                | 0.0000          | 0.0              |
| AP+OH              | 1            | 185.0921               | 185.0919                | -0.0002         | -1.1             |
| b3+OH              | 1            | 273.1557               | 273.1555                | -0.0002         | -0.7             |
| PGE+OH             | 1            | 300.1190               | 300.1185                | -0.0005         | -1.7             |
| y7                 | 2            | 341.6851               | 341.6846                | -0.0010         | -1.5             |
| y4                 | 1            | 400.2303               | 400.2294                | -0.0009         | -2.3             |
| PGEK+2OH           | 1            | 444.2089               | 444.2080                | -0.0009         | -2.0             |
| y5                 | 1            | 457.2518               | 457.2518                | 0.0000          | 0.0              |
| y12+2OH            | 2            | 591.7967               | 591.7658                | -0.0618         | -52.3            |
| y13+2OH            | 2            | 627.3153               | 627.3162                | 0.0018          | 1.4              |
| y14+2OH            | 2            | 655.8260               | 655.8248                | -0.0024         | -1.8             |
| y7                 | 1            | 682.3631               | 682.3621                | -0.0010         | -1.5             |
| [M+2H]+3OH         | 2            | 727.8710               | 727.8699                | -0.0022         | -1.5             |
| y8                 | 1            | 739.3846               | 739.3835                | -0.0011         | -1.5             |
| y9+OH              | 1            | 883.4744               | 883.4747                | 0.0003          | 0.3              |
| y11+OH             | 1            | 1069.5385              | 1069.5396               | 0.0011          | 1.0              |
| y12+2OH            | 1            | 1182.5862              | 1182.5848               | -0.0014         | -1.2             |
| y14+2OH            | 1            | 1310.6448              | 1310.6475               | 0.0027          | 2.1              |

\*Unlocalized sites: K561-OH.Gal.Glc, K567-OH.Gal.Glc

4\_5\_2012Col5a1\_GluCandAspN\_HCD1 #391 RT: 3.91 AV: 1 NL: 4.75E5

T: FTMS + p NSI d Full ms2 593.95@hcd35.00 [115.00-1795.00]

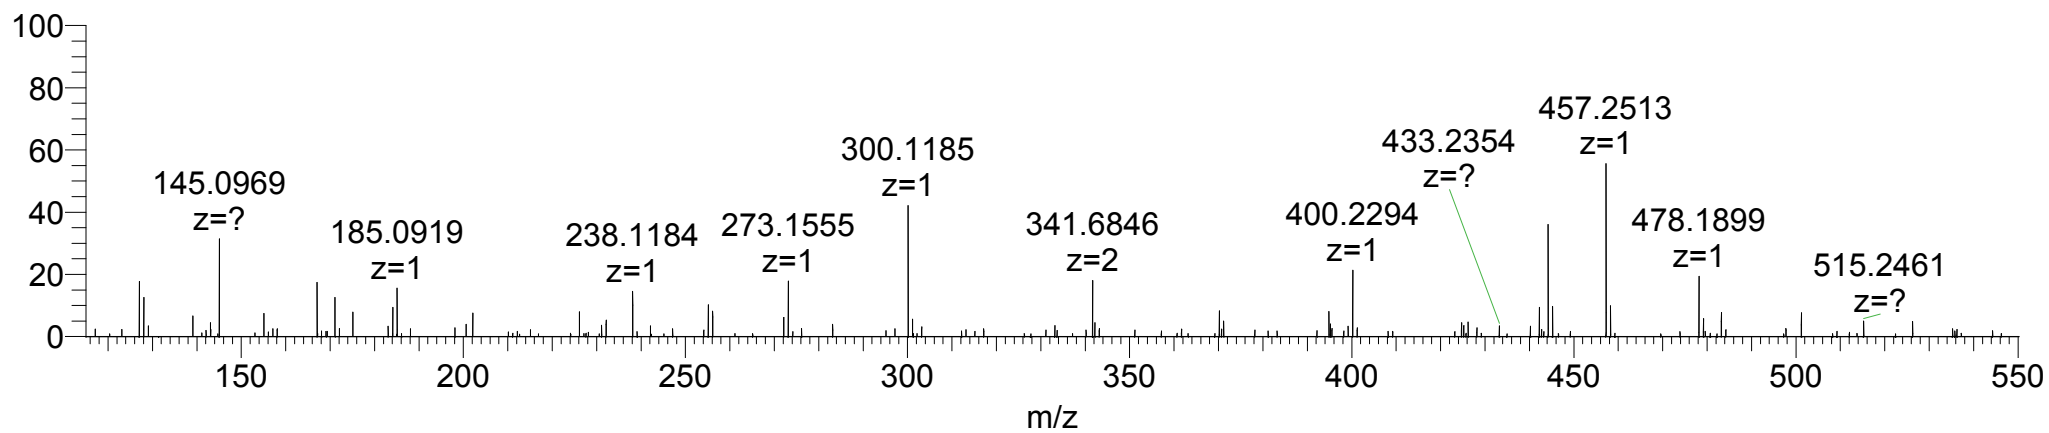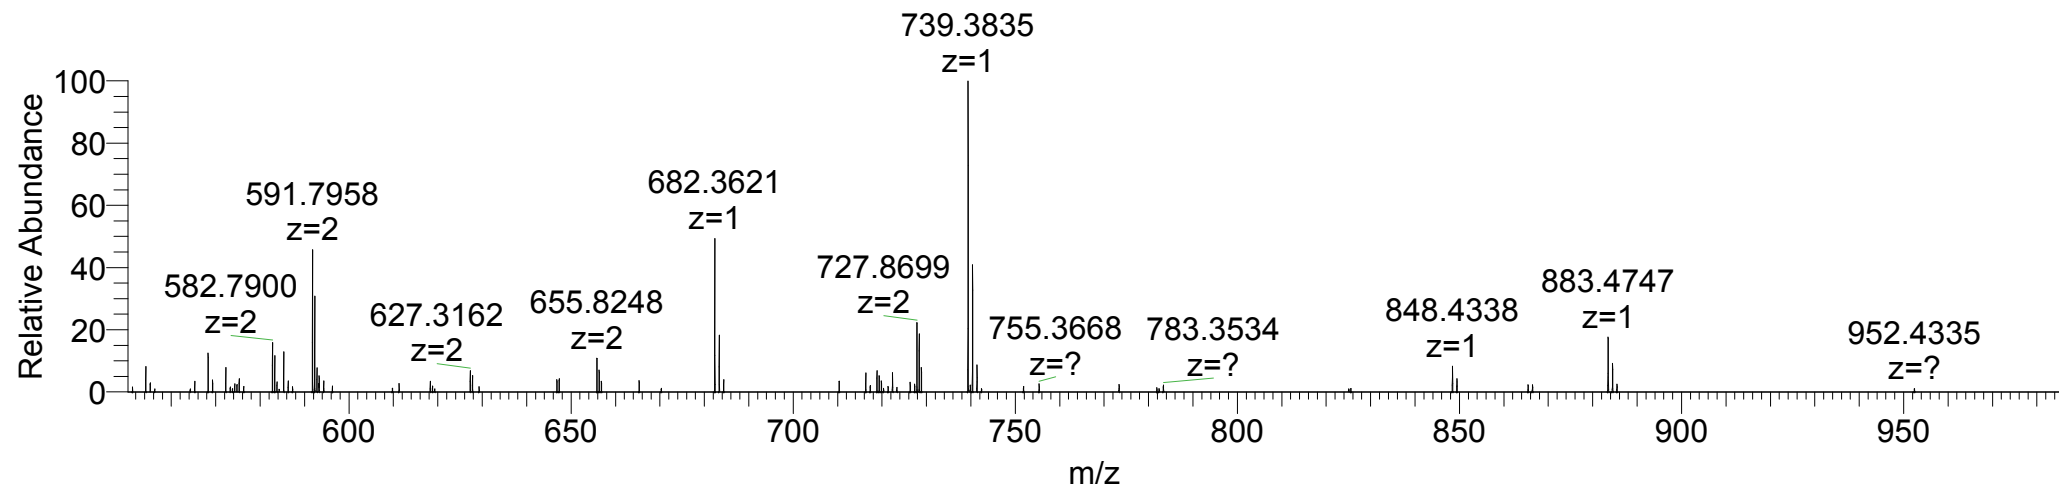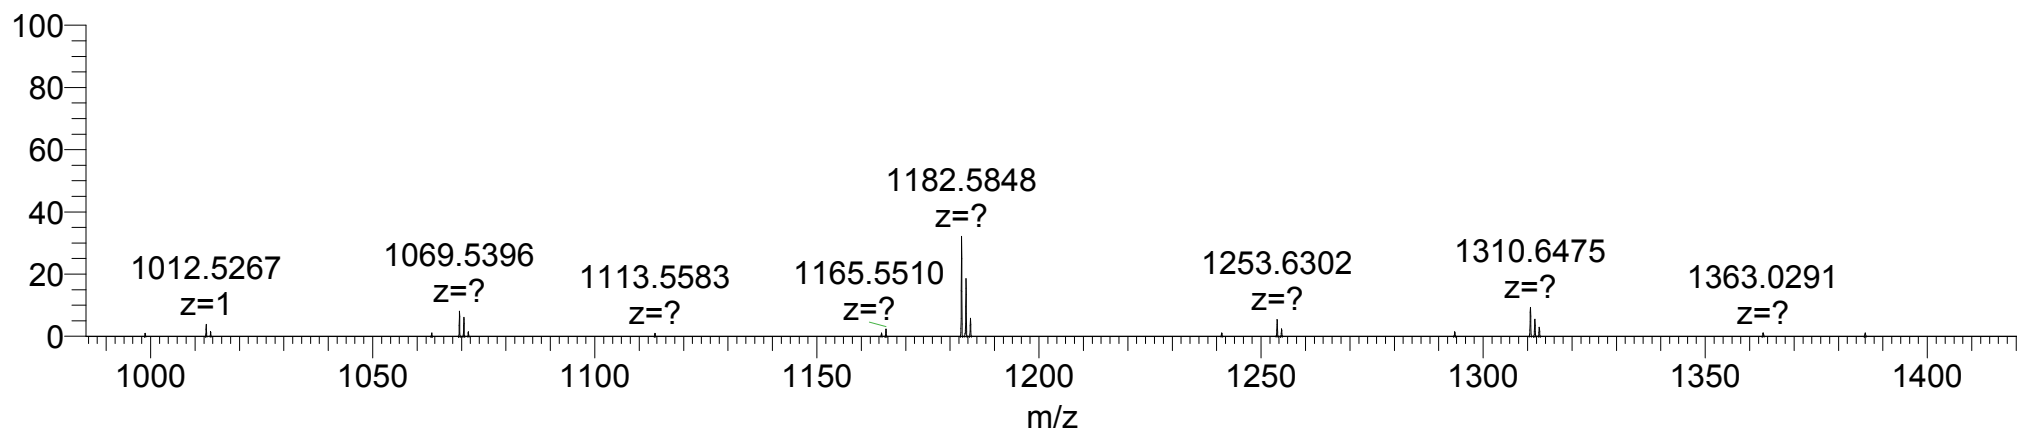

Bovine

37.

P585-OH, P587-OH, P594-OH

#576-600: DGLQGPVGLPGPAGPVGPPGEDGDK

| Ion         | charge state | Theoretical m/z (mono) | Experimental m/z (mono) | Mass error (Da) | Mass error (PPM) |
|-------------|--------------|------------------------|-------------------------|-----------------|------------------|
| [M+2H]+3OH  | 2            | 1166.0586              | 1166.0651               | 0.0130          | 5.6              |
| GPV         | 1            | 254.1499               | 254.1507                | 0.0008          | 3.2              |
| y3          | 1            | 319.1612               | 319.1608                | -0.0004         | -1.3             |
| QGPVG-NH3   | 1            | 422.2034               | 422.2039                | 0.0005          | 1.2              |
| b5          | 1            | 471.2198               | 471.2205                | 0.0007          | 1.5              |
| PGPAGPV+2OH | 1            | 608.3039               | 608.3027                | -0.0012         | -2.0             |
| b7          | 1            | 667.3410               | 667.3416                | 0.0006          | 0.9              |
| b8          | 1            | 724.3624               | 724.3628                | 0.0004          | 0.6              |
| y7+OH       | 1            | 733.2999               | 733.2988                | -0.0011         | -1.5             |
| y16+3OH     | 2            | 747.8390               | 747.8395                | 0.0010          | 0.7              |
| b9-H2O      | 1            | 819.4359               | 819.4370                | 0.0011          | 1.3              |
| y8+OH       | 1            | 830.3527               | 830.3531                | 0.0004          | 0.5              |
| b9          | 1            | 837.4465               | 837.4458                | -0.0007         | -0.8             |
| y9+OH       | 1            | 887.3741               | 887.3752                | 0.0011          | 1.2              |
| y20+3OH     | 2            | 930.9523               | 930.9539                | 0.0032          | 1.7              |
| y11+OH      | 1            | 1083.4953              | 1083.4943               | -0.0010         | -0.9             |
| y12+OH      | 1            | 1140.5168              | 1140.5145               | -0.0023         | -2.0             |
| y14+2OH     | 1            | 1324.6016              | 1324.6040               | 0.0024          | 1.8              |
| y15+2OH     | 1            | 1381.6230              | 1381.6255               | 0.0025          | 1.8              |
| y16+3OH     | 1            | 1494.6707              | 1494.6735               | 0.0028          | 1.9              |

2\_2\_2012Col5a1\_Bovine\_HCD1\_CE30 #3890 RT: 32.48 AV: 1 NL: 2.17E4

T: FTMS + p NSI d Full ms2 1166.07@hcd30.00 [100.00-2000.00]

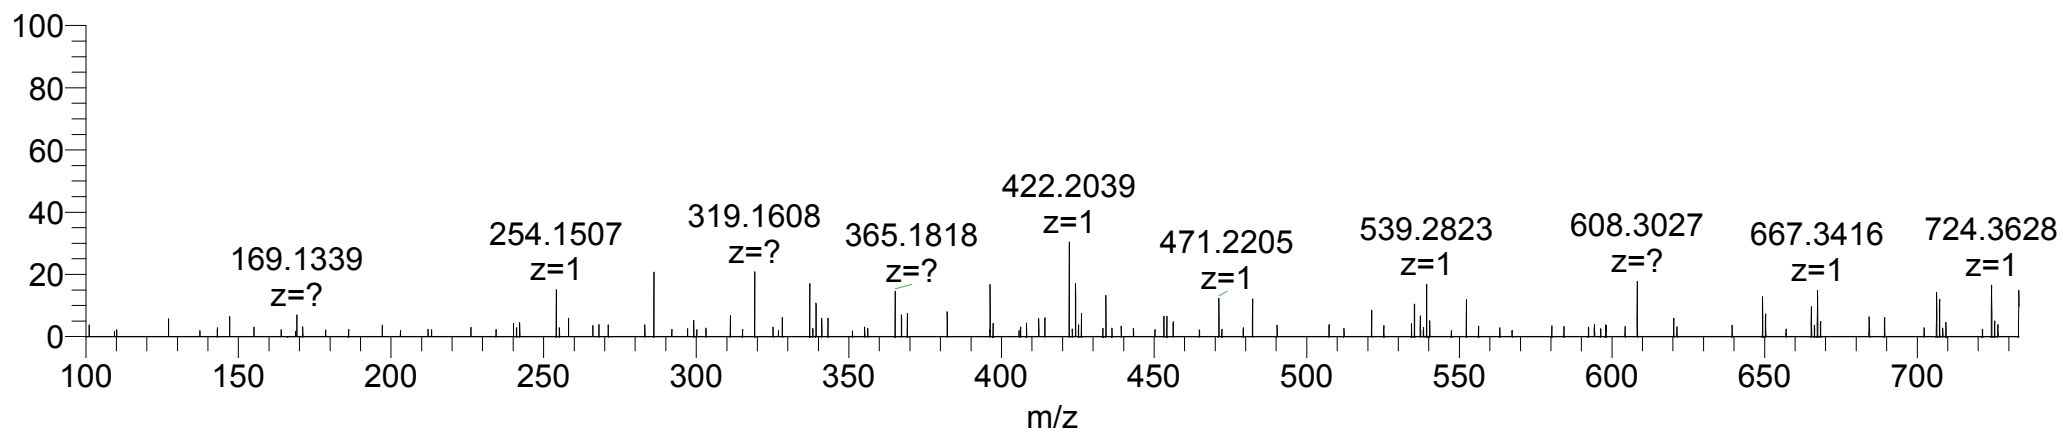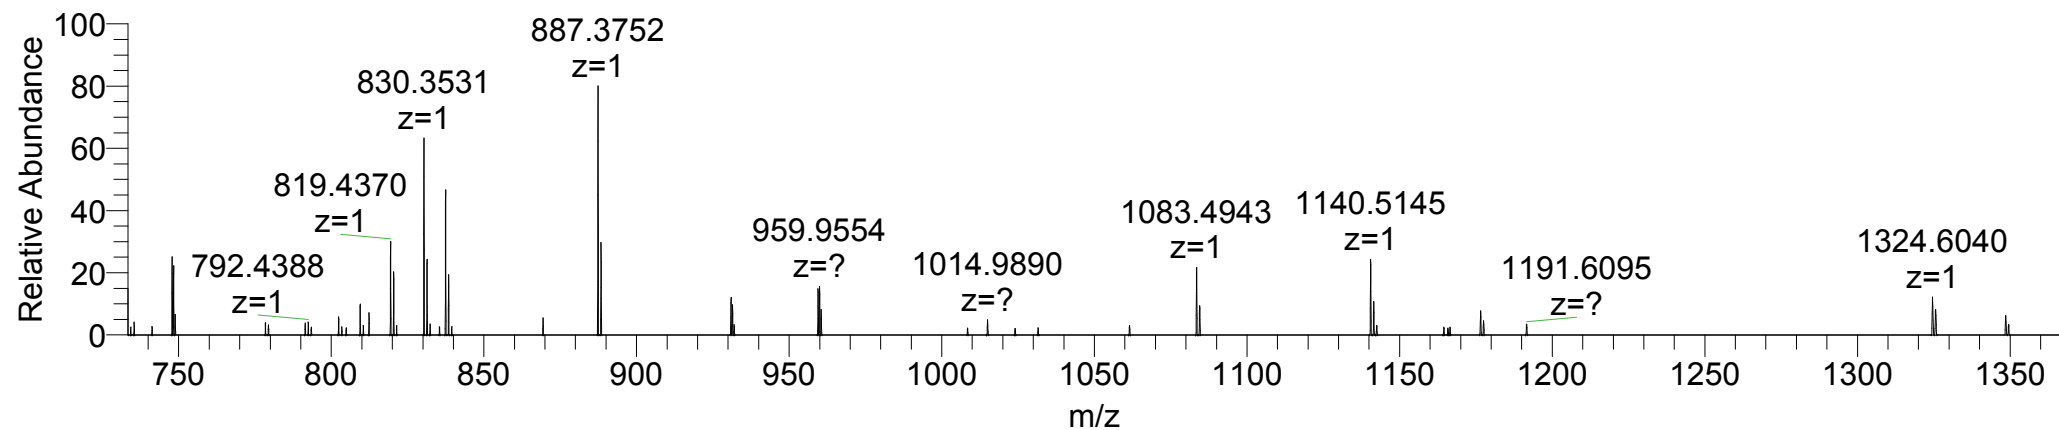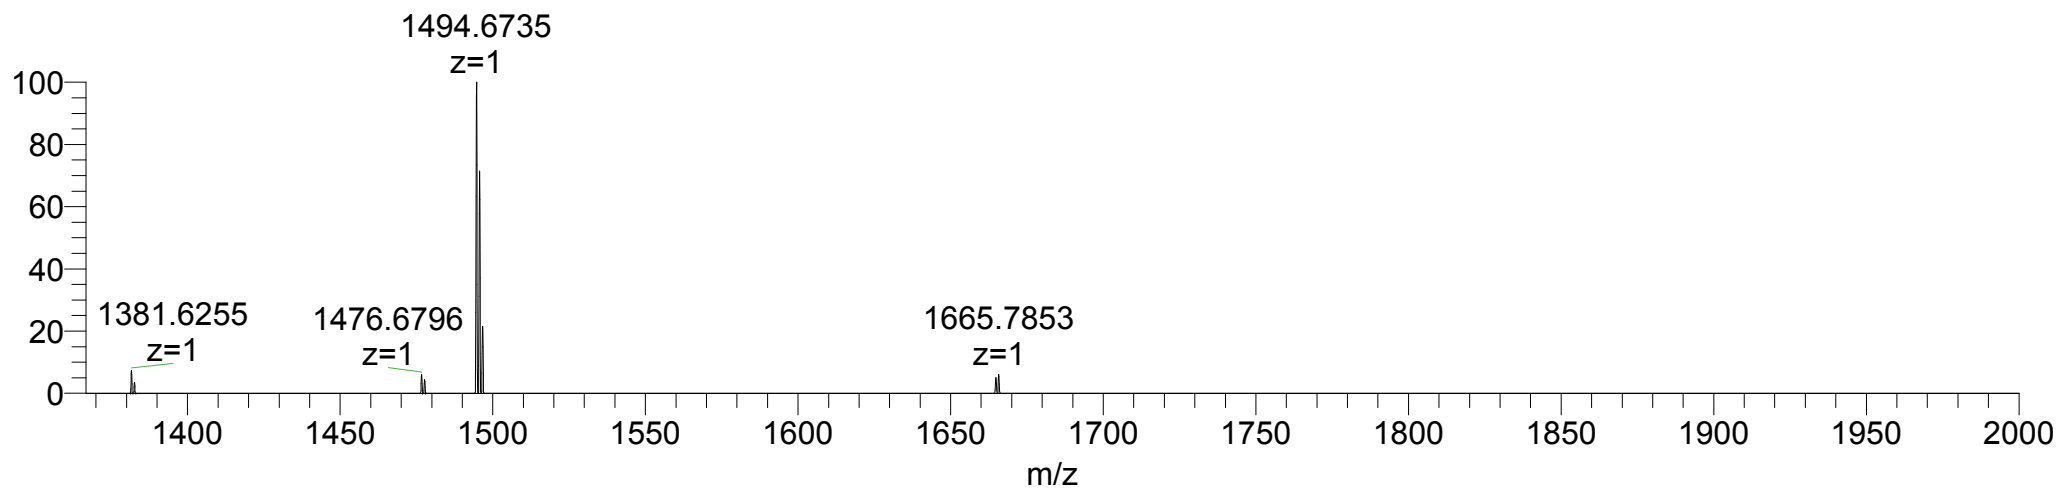

Bovine

38.

K600-OH.Gal.Glc

#597-604: DGDKGEIG

| Ion               | charge state | Theoretical m/z (mono) | Experimental m/z (mono) | Mass error (Da) | Mass error (PPM) |
|-------------------|--------------|------------------------|-------------------------|-----------------|------------------|
| [M+2H]+OH+Gal.Glc | 2            | 565.7328               | 565.7333                | 0.0010          | 0.9              |
| y2                | 1            | 189.1234               | 189.1233                | -0.0001         | -0.5             |
| DK+OH-H2O         | 1            | 242.1135               | 242.1133                | -0.0002         | -0.8             |
| DK+OH             | 1            | 260.1241               | 260.1244                | 0.0003          | 1.2              |
| b4+OH             | 1            | 432.1725               | 432.1715                | -0.0010         | -2.3             |
| b5-H2O+OH         | 1            | 471.1834               | 471.1841                | 0.0007          | 1.5              |
| b5+OH             | 1            | 489.1940               | 489.1958                | 0.0018          | 3.7              |
| b6-H2O+OH         | 1            | 600.2260               | 600.2261                | 0.0001          | 0.2              |
| b6+OH             | 1            | 618.2366               | 618.2366                | 0.0000          | 0.0              |
| a7+OH             | 1            | 703.3257               | 703.3242                | -0.0015         | -2.1             |
| b7+OH             | 1            | 731.3206               | 731.3190                | -0.0016         | -2.2             |
| [M+H]+OH          | 1            | 806.3527               | 806.3536                | 0.0009          | 1.1              |



4\_5\_2012Col5a1\_AspN\_HCD2 #636 RT: 3.93 AV: 1 NL: 1.98E5

T: FTMS + p NSI d Full ms2 565.73@hcd35.00 [115.00-1145.00]

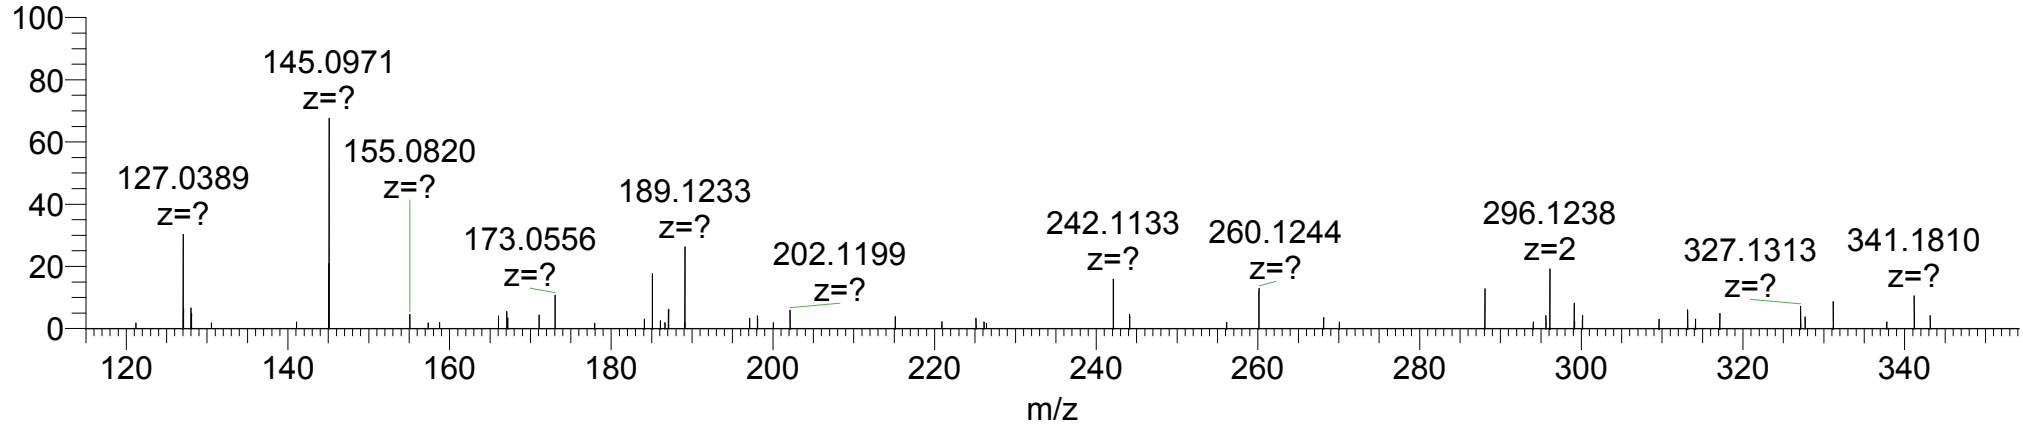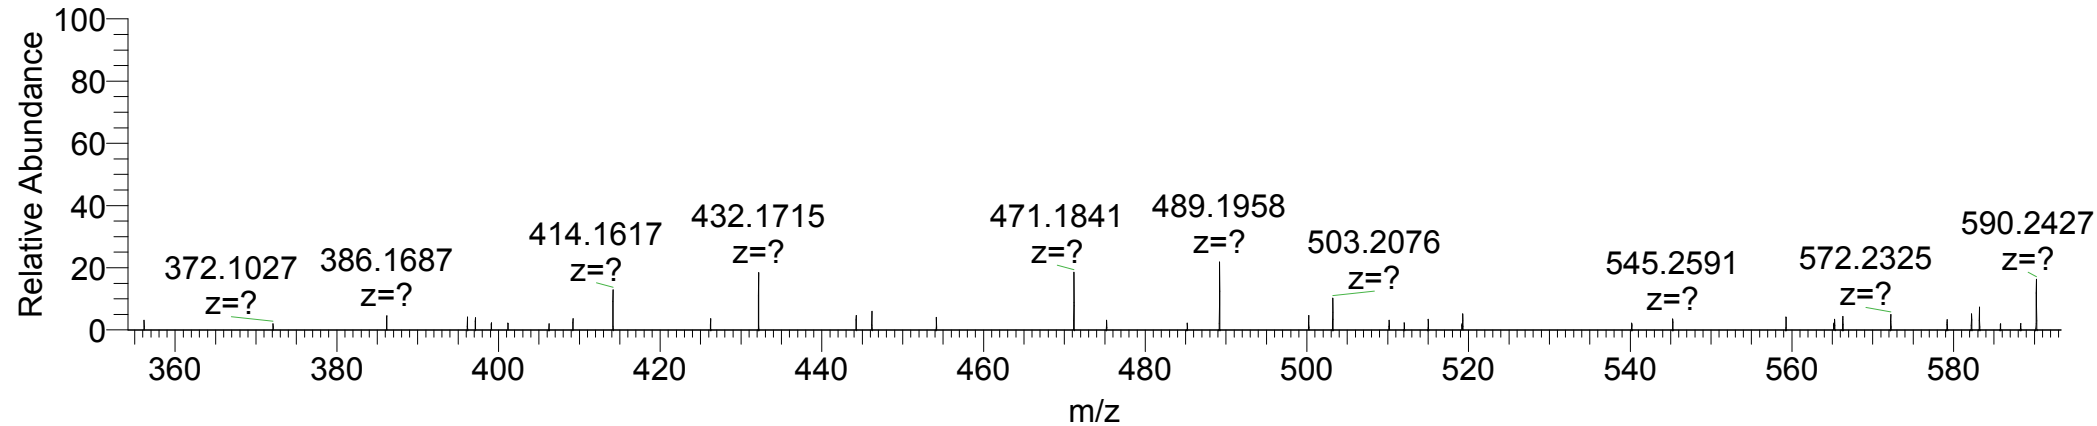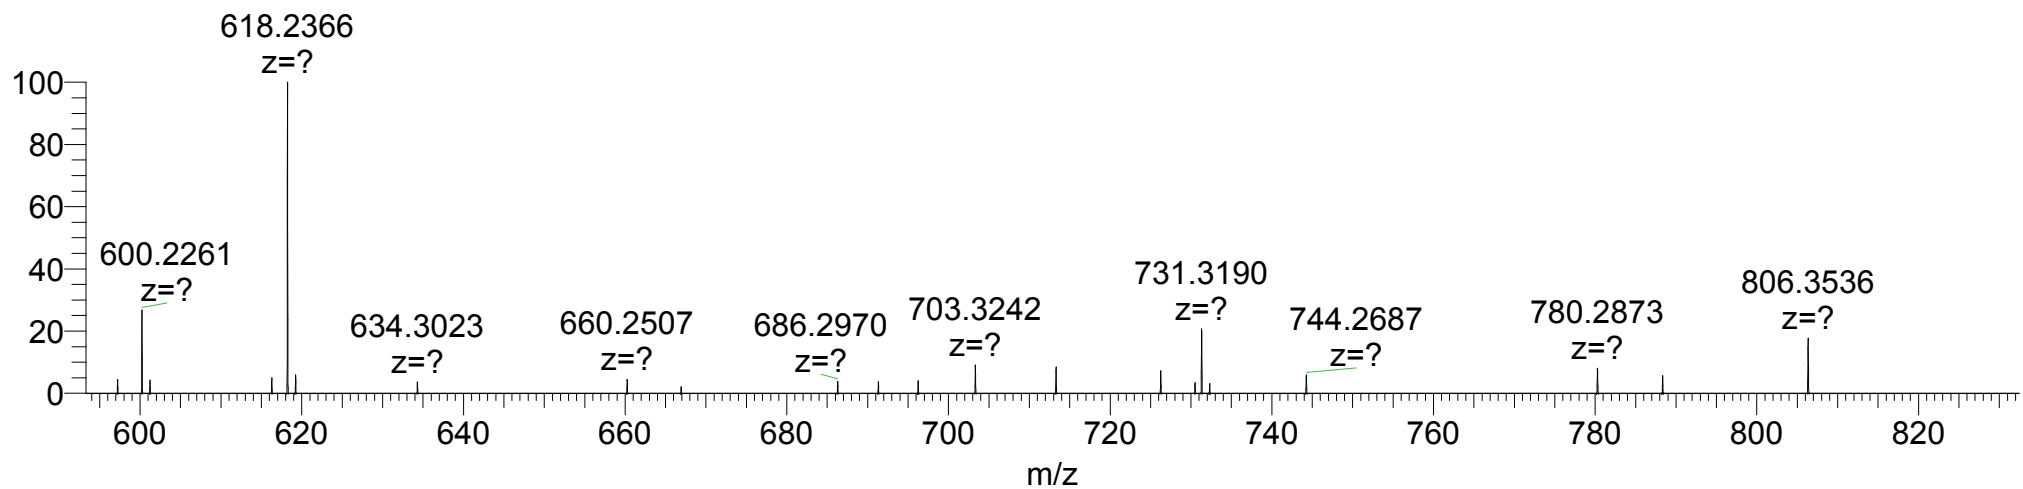

Bovine

39.

P606-OH, K609-OHGal.Glc, K612-OH.Gal.Glc, K615-OH.Gal.Glc

#603-617: IGEPPGQKGSKGDKGE

| Ion                       | charge state | Theoretical m/z (mono) | Experimental m/z (mono) | Mass error (Da) | Mass error (PPM) |
|---------------------------|--------------|------------------------|-------------------------|-----------------|------------------|
| [M+4H]+4OH+3Gal.Glc       | 4            | 631.5170               | 631.5176                | 0.0024          | 1.0              |
| b2                        | 1            | 171.1128               | 171.1130                | 0.0002          | 1.2              |
| y2-H2O/GE                 | 1            | 187.0713               | 187.0716                | 0.0003          | 1.6              |
| y2                        | 1            | 205.0819               | 205.0821                | 0.0002          | 1.0              |
| GDK-H2O+OH                | 1            | 299.1350               | 299.1356                | 0.0006          | 2.0              |
| y3+OH                     | 1            | 349.1718               | 349.1724                | 0.0006          | 1.7              |
| PGQK+2OH/<br>KGDK-H2O+2OH | 1            | 443.2249               | 443.2260                | 0.0011          | 2.5              |
| y5+OH                     | 1            | 521.2202               | 521.2225                | 0.0023          | 4.4              |
| y12+4OH                   | 2            | 626.2942               | 626.2953                | 0.0022          | 1.8              |
| b13+4OH                   | 2            | 673.8310               | 673.8312                | 0.0004          | 0.3              |
| y14+4OH                   | 2            | 719.3262               | 719.3264                | 0.0004          | 0.3              |
| [M+2H]+4OH                | 2            | 775.8683               | 775.8694                | 0.0022          | 1.4              |
| y8+2OH                    | 1            | 809.3636               | 809.3644                | 0.0008          | 1.0              |
| y9+3OH                    | 1            | 953.4534               | 953.4523                | -0.0011         | -1.2             |
| b10+3OH                   | 1            | 1030.5164              | 1030.5289               | 0.0125          | 12.1             |
| b12+3OH                   | 1            | 1202.5648              | 1202.5698               | 0.0050          | 4.2              |
| y12+4OH                   | 1            | 1251.5811              | 1251.5781               | -0.0030         | -2.4             |
| y14+4OH                   | 1            | 1437.6452              | 1437.6331               | -0.0121         | -8.4             |
| [M+H]+4OH                 | 1            | 1550.7293              | 1550.7332               | 0.0039          | 2.5              |

4\_5\_2012Col5a1\_GluCandAspN\_HCD2 #520 RT: 3.23 AV: 1 NL: 1.87E4

T: FTMS + p NSI d Full ms2 631.77@hcd35.00 [115.00-2000.00]

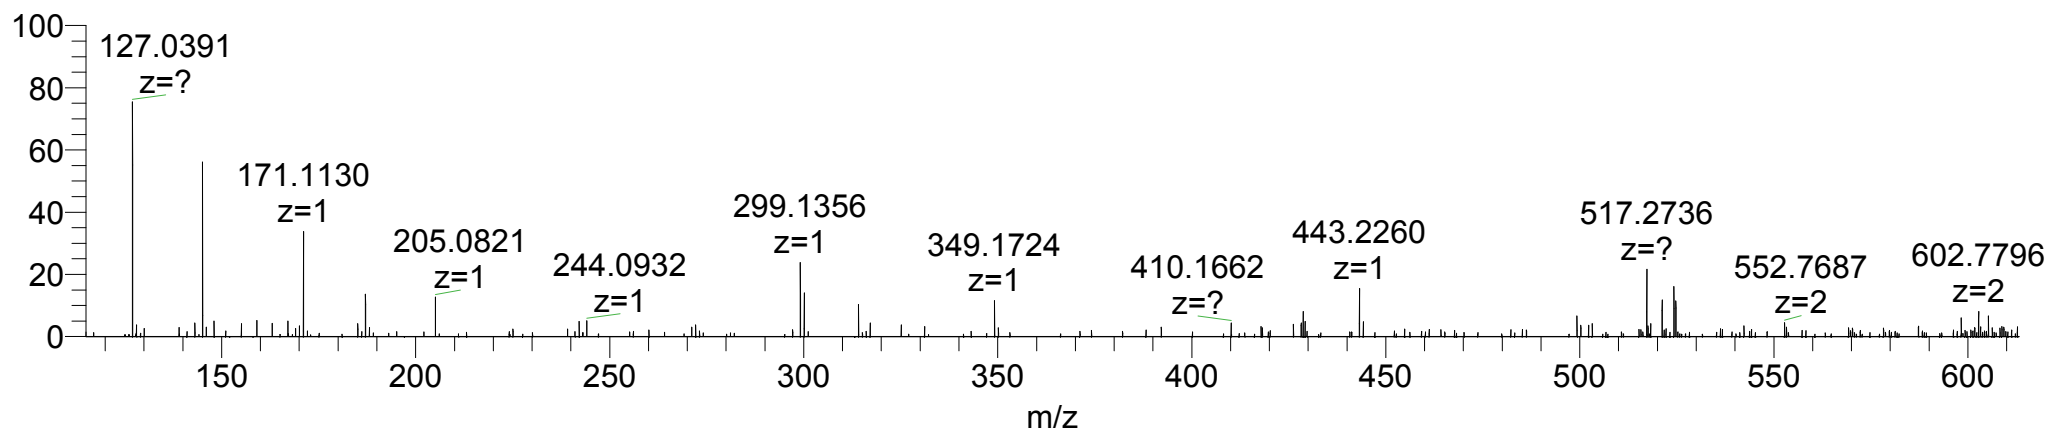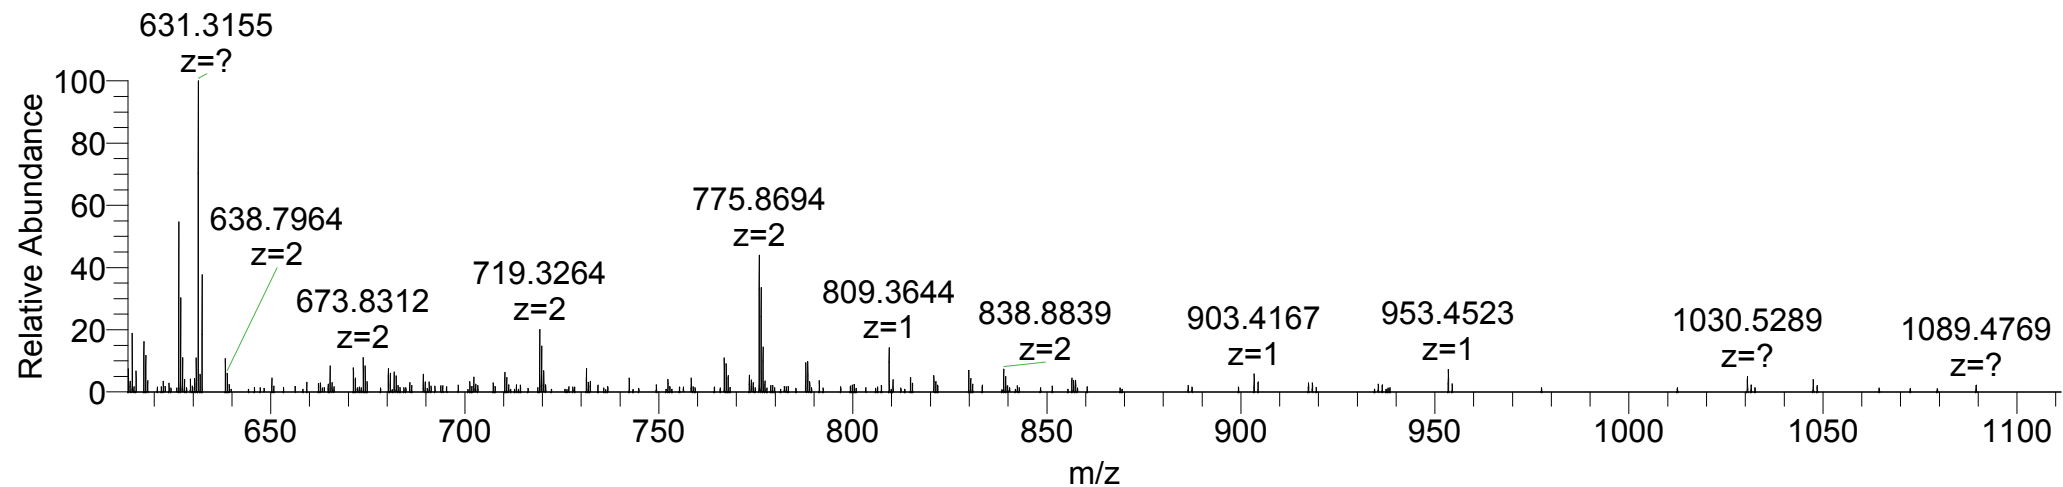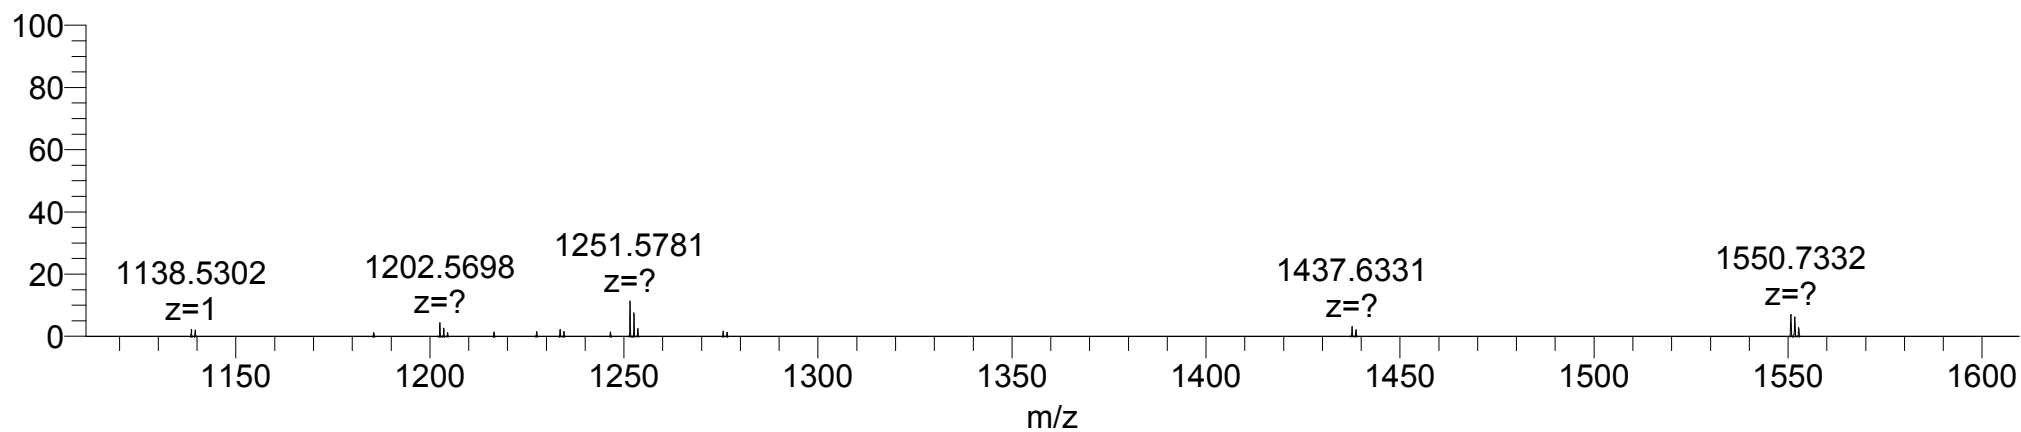

Bovine

40.

**K615-OH.Gal.Glc, P621-OH, P633-OH**

#613-645: GDKGEQGPPGPTGPQGPIGQPGPSGADGEPGPR

| Ion                | charge state | Theoretical m/z (mono) | Experimental m/z (mono) | Mass error (Da) | Mass error (PPM) |
|--------------------|--------------|------------------------|-------------------------|-----------------|------------------|
| [M+3H]+4OH+Gal.Glc | 3            | 1146.1801              | 1146.1863               | -0.0186         | -5.4             |
| y4+OH              | 1            | 442.2409               | 442.2428                | -0.0019         | -4.3             |
| y13+2OH            | 2            | 613.2758               | 613.2780                | -0.0044         | -3.6             |
| y6+OH              | 1            | 628.3049               | 628.3075                | -0.0026         | -4.1             |
| b7+OH              | 1            | 688.2897               | 688.2926                | -0.0029         | -4.2             |
| y7+OH              | 1            | 743.3319               | 743.3350                | -0.0031         | -4.2             |
| y18+2OH            | 2            | 839.3950               | 839.3989                | -0.0078         | -4.7             |
| b20-H2O+2OH        | 2            | 935.4399               | 935.4437                | -0.0076         | -4.1             |
| b20+2OH            | 2            | 944.4452               | 944.4499                | -0.0094         | -5.0             |
| y20+2OH            | 2            | 951.9507               | 951.9557                | -0.0100         | -5.3             |
| y21+2OH            | 2            | 980.4614               | 980.4667                | -0.0106         | -5.4             |
| [M+3H]+4OH         | 3            | 1038.1449              | 1038.1510               | -0.0183         | -5.9             |
| [M+3H]+4OH+Gal     | 3            | 1092.1625              | 1092.1685               | -0.0180         | -5.5             |
| y12+OH             | 1            | 1112.4967              | 1112.5043               | -0.0076         | -6.8             |
| [M+3H]+4OH+Gal.Glc | 3            | 1146.1801              | 1146.1862               | -0.0183         | -5.3             |
| y25+3OH            | 2            | 1164.5462              | 1164.5527               | -0.0130         | -5.6             |
| y13+OH             | 1            | 1225.5444              | 1225.5496               | -0.0052         | -4.2             |
| y27+3OH            | 2            | 1241.5833              | 1241.5894               | -0.0122         | -4.9             |
| b29+3OH            | 2            | 1336.0970              | 1336.1017               | -0.0094         | -3.5             |
| y15+2OH            | 1            | 1410.6244              | 1410.6328               | -0.0084         | -6.0             |
| b29+3OH+Gal.Glc    | 2            | 1498.1498              | 1498.1575               | -0.0154         | -5.1             |

\*Unlocalized sites: P642-OH?,P644-OH?

Pseudolocalized sites: P642-OH

2\_2\_2012Col5a1\_Bovine\_us2Top3MS3Top2 #1032 RT: 14.66 AV: 1 NL: 1.76E5

T: FTMS + p NSI d Full ms2 1146.52@cid35.00 [305.00-2000.00]

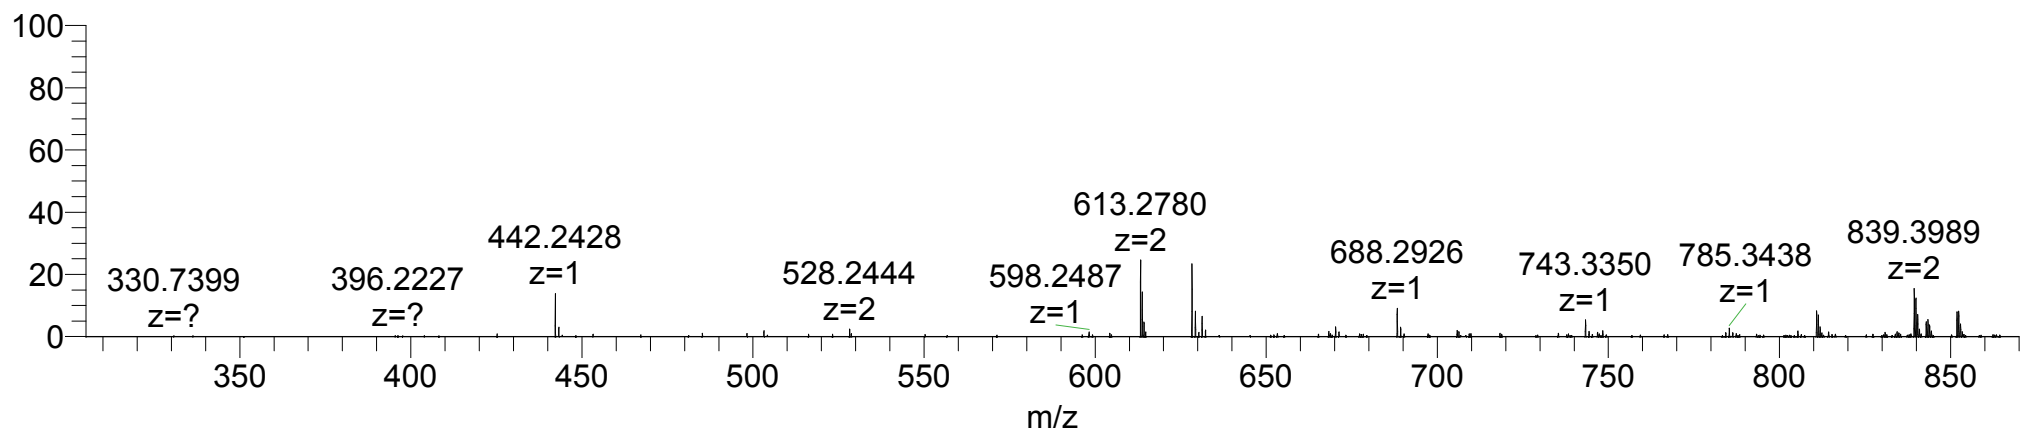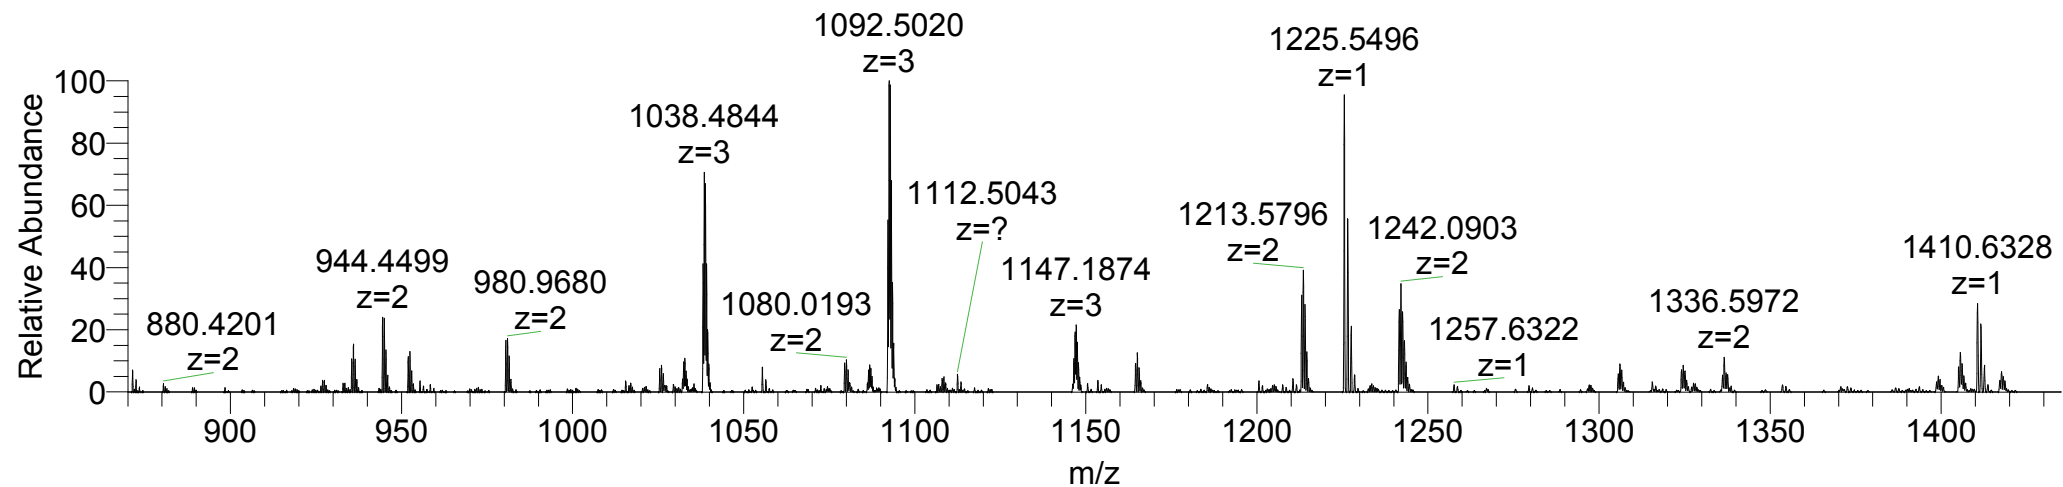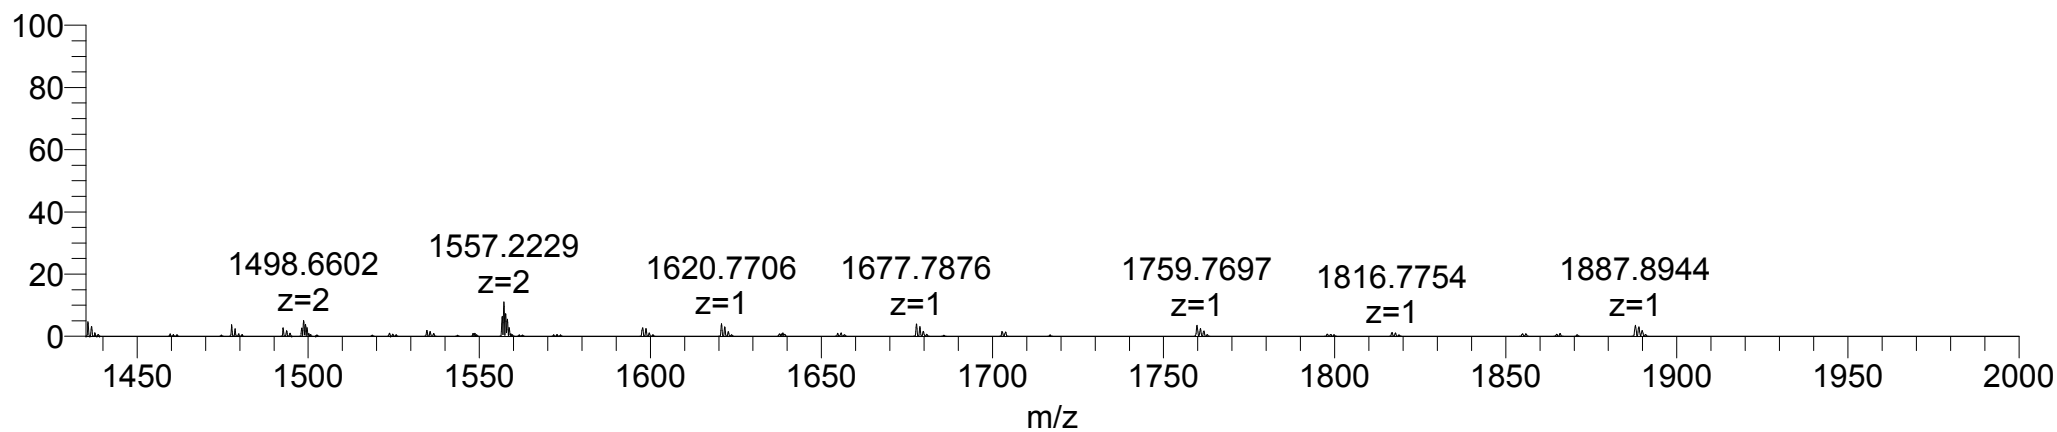

Bovine

41.

**K654-OH.Gal.Glc, P663-OH, P665-OH, P666-OH**

#652-671: GQKGDEGPRGFPGPPGPVGL

| Ion                | charge state | Theoretical m/z (mono) | Experimental m/z (mono) | Mass error (Da) | Mass error (PPM) |
|--------------------|--------------|------------------------|-------------------------|-----------------|------------------|
| [M+2H]+4OH+Gal.Glc | 2            | 1154.0348              | 1154.0363               | 0.0030          | 1.3              |
| b2                 | 1            | 186.0873               | 186.0870                | -0.0003         | -1.6             |
| GPP+2OH            | 1            | 284.1241               | 284.1241                | 0.0000          | 0.0              |
| y4                 | 1            | 385.2445               | 385.2439                | -0.0006         | -1.6             |
| PPGPV-28+2OH       | 1            | 452.2504               | 452.2525                | 0.0021          | 4.7              |
| PPGPV+2OH          | 1            | 480.2453               | 480.2454                | 0.0001          | 0.2              |
| y6+OH              | 1            | 555.3137               | 555.3164                | 0.0027          | 4.9              |
| y7+2OH             | 1            | 668.3614               | 668.3614                | 0.0000          | 0.0              |
| y9+3OH             | 1            | 838.4305               | 838.4279                | -0.0026         | -3.1             |
| a11+OH             | 1            | 1117.5385              | 1117.5342               | -0.0043         | -3.9             |
| b11+OH             | 1            | 1145.5334              | 1145.5361               | 0.0027          | 2.4              |
| b13+2OH            | 1            | 1315.6026              | 1315.6012               | -0.0014         | -1.1             |
| y14+3OH            | 1            | 1352.6957              | 1352.7001               | 0.0044          | 3.3              |
| y15+3OH            | 1            | 1481.7383              | 1481.7358               | -0.0025         | -1.7             |
| y17+3OH            | 1            | 1653.7867              | 1653.7823               | -0.0044         | -2.7             |
| [M+H]+4OH          | 1            | 1982.9566              | 1982.9566               | 0.0000          | 0.0              |

4\_5\_2012Col5a1\_Chmy\_HCD2 #4876 RT: 29.56 AV: 1 NL: 7.79E4

T: FTMS + p NSI d Full ms2 1154.54@hcd35.00 [115.00-2000.00]

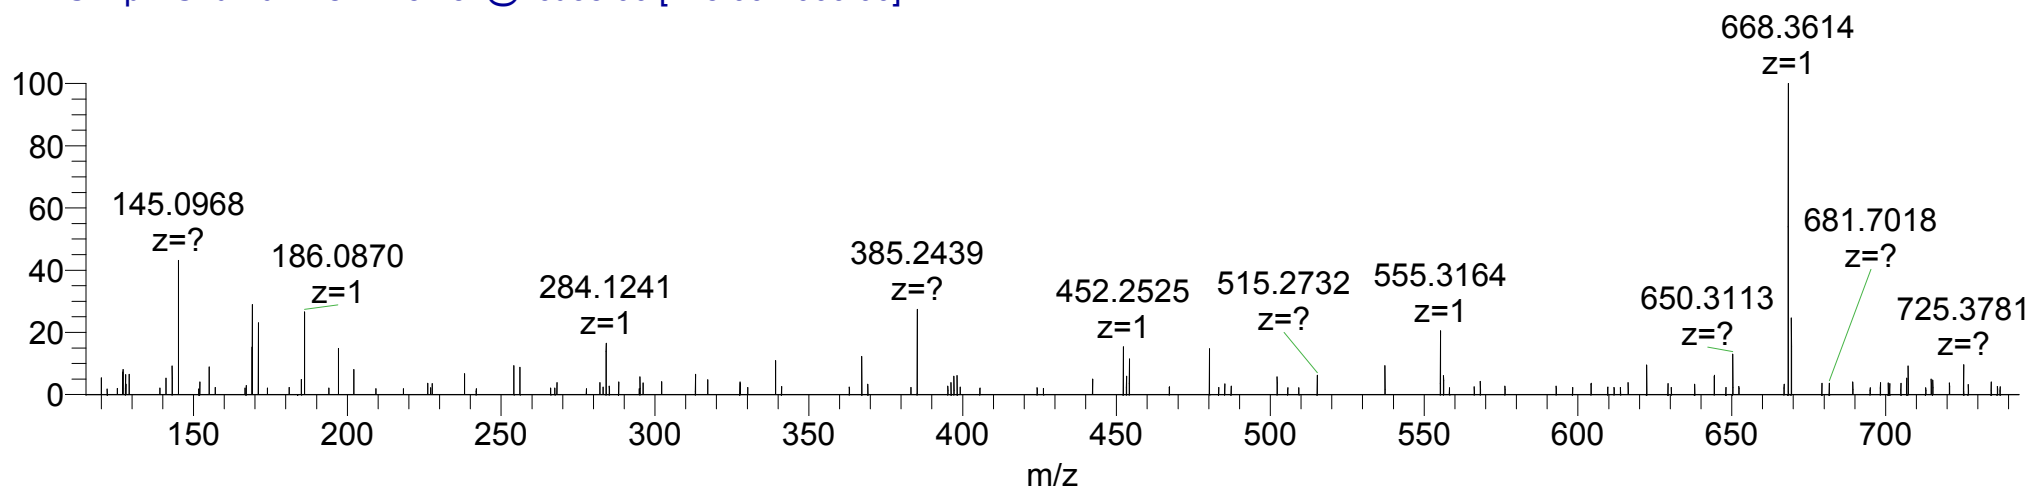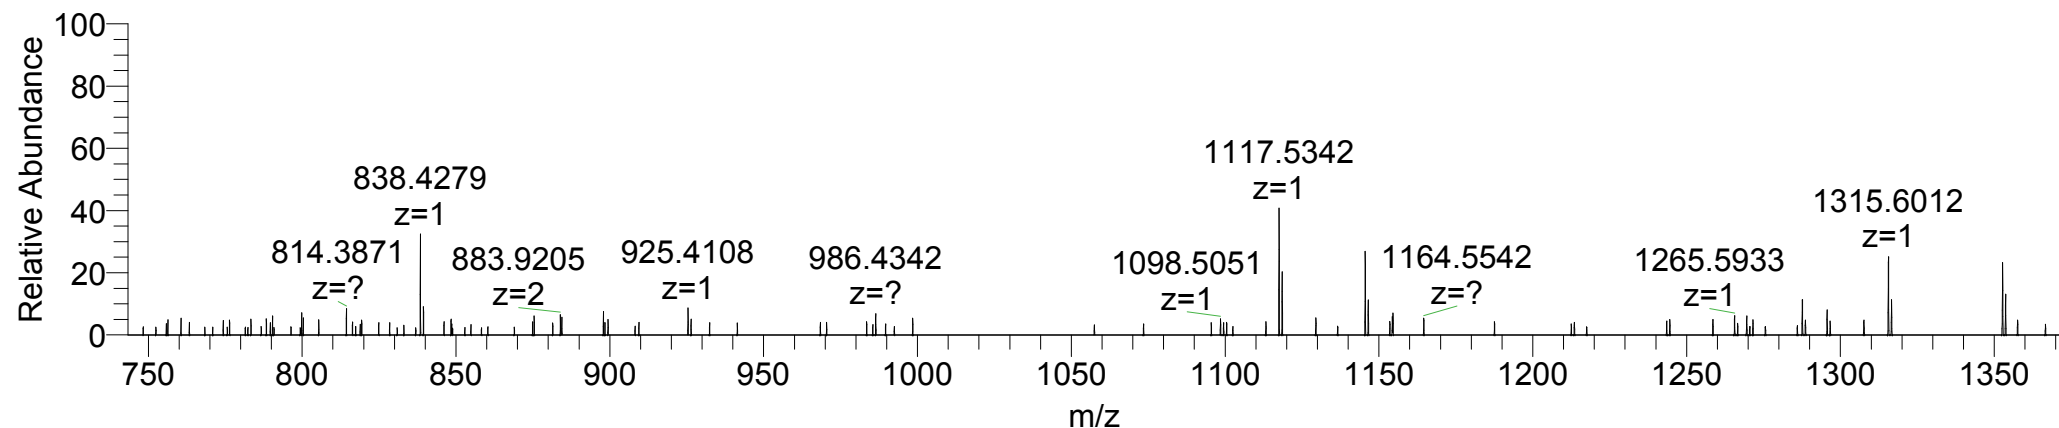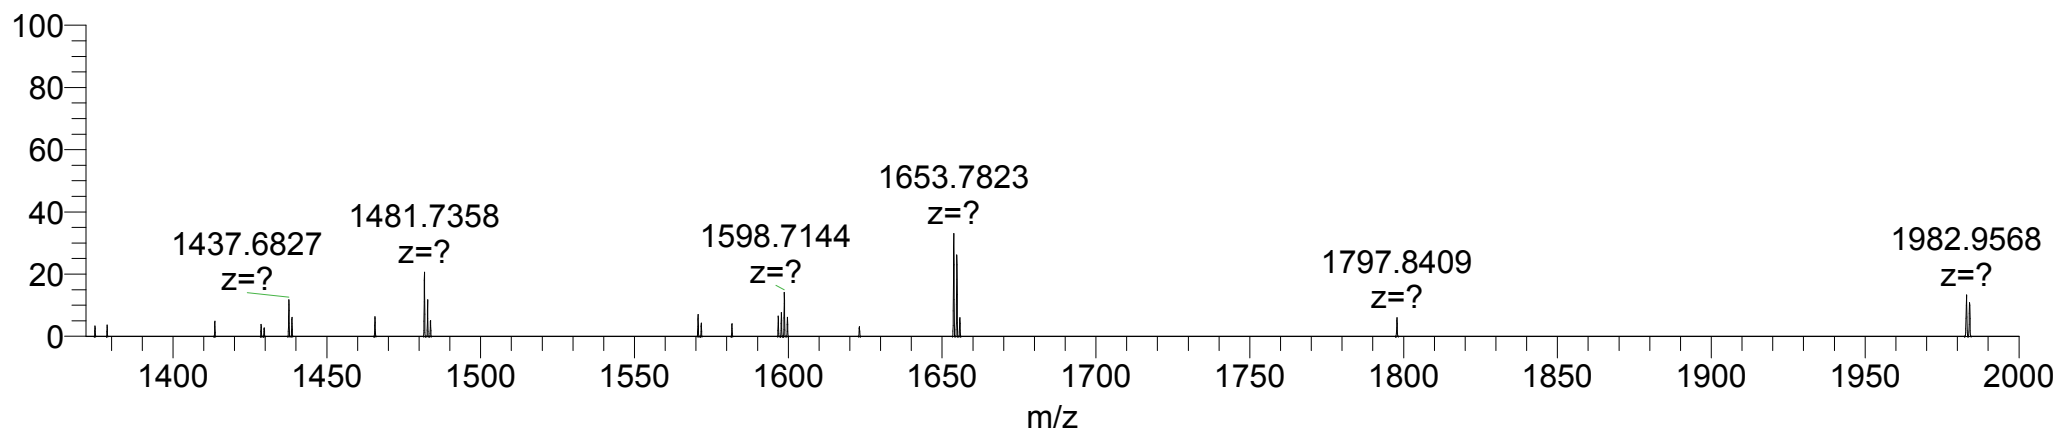

Bovine

42.

**P663-OH, P666-OH, P675-OH, P678-OH, K681-OH.Gal.Glc**

#675-685: EGPRGFPGPPGPVGLQGLPGPPGEKGETG

| Ion                | charge state | Theoretical m/z (mono) | Experimental m/z (mono) | Mass error (Da) | Mass error (PPM) |
|--------------------|--------------|------------------------|-------------------------|-----------------|------------------|
| [M+3H]+5OH+Gal.Glc | 3            | 1048.1615              | 1048.1616               | 0.0003          | 0.1              |
| PG+OH              | 1            | 171.0764               | 171.0763                | -0.0001         | -0.6             |
| PPG+OH             | 1            | 268.1292               | 268.1288                | -0.0004         | -1.5             |
| PPGE+OH            | 1            | 397.1718               | 397.1715                | -0.0003         | -0.8             |
| y5+OH              | 1            | 507.2409               | 507.2409                | 0.0000          | 0.0              |
| b11+2OH            | 2            | 541.2567               | 541.2590                | 0.0046          | 4.3              |
| a6                 | 1            | 616.3202               | 616.3201                | -0.0001         | -0.2             |
| b6                 | 1            | 644.3151               | 644.3151                | 0.0000          | 0.0              |
| PGPPGEK+3OH        | 1            | 711.3308               | 711.3293                | -0.0015         | -2.1             |
| y8+2OH             | 1            | 806.3527               | 806.3507                | -0.0020         | -2.5             |
| b8+OH              | 1            | 814.3842               | 814.3833                | -0.0009         | -1.1             |
| y9+2OH             | 1            | 903.4054               | 903.4058                | 0.0004          | 0.4              |
| b9+OH              | 1            | 911.4370               | 911.4343                | -0.0027         | -3.0             |
| y10+2OH            | 1            | 960.4269               | 960.4236                | -0.0033         | -3.4             |
| y11+3OH            | 1            | 1073.4746              | 1073.4728               | -0.0018         | -1.7             |
| b11+2OH            | 1            | 1081.5061              | 1081.5048               | -0.0013         | -1.2             |
| a13+2OH            | 1            | 1249.6324              | 1249.6342               | 0.0018          | 1.4              |
| b13+2OH            | 1            | 1277.6273              | 1277.6323               | 0.0050          | 3.9              |
| b14+2OH            | 1            | 1334.6488              | 1334.6412               | -0.0076         | -5.7             |
| a15+2OH            | 1            | 1419.7379              | 1419.7368               | -0.0011         | -0.8             |
| b17+2OH            | 1            | 1632.8129              | 1632.8129               | 0.0000          | 0.0              |
| a18+2OH            | 1            | 1717.9020              | 1717.9037               | 0.0017          | 1.0              |
| b18+2OH            | 1            | 1745.8969              | 1745.8976               | 0.0007          | 0.4              |



4\_5\_2012Col5a1\_AspN\_HCD1 #8137 RT: 32.50 AV: 1 NL: 4.26E6

T: FTMS + p NSI d Full ms2 1048.50@hcd35.00 [115.00-2000.00]

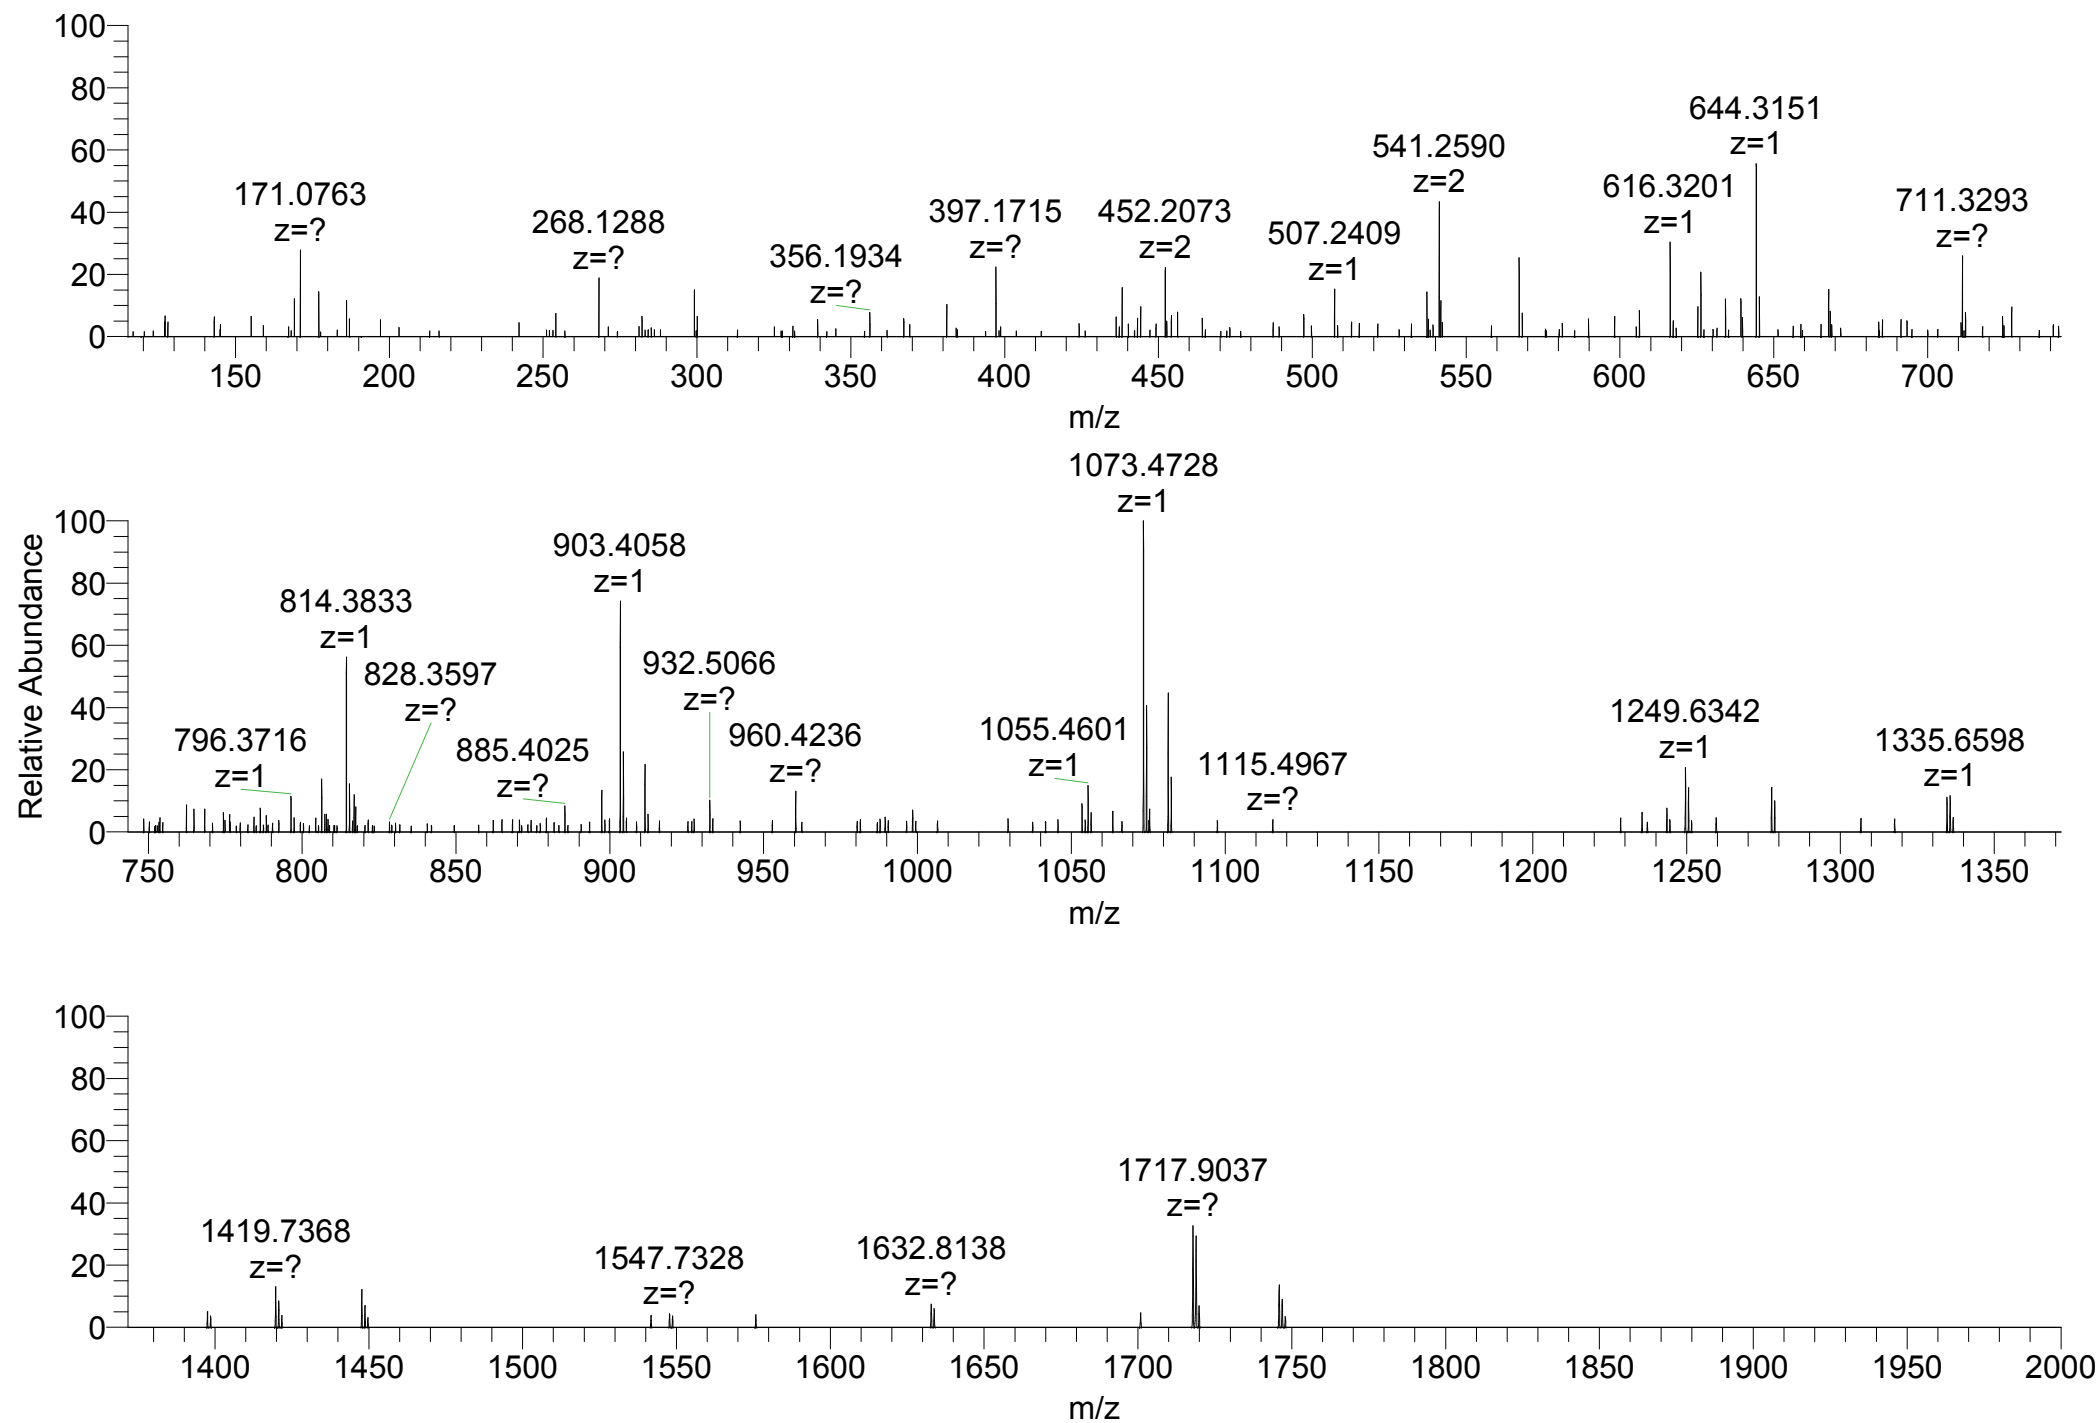

Bovine

43.

P693-OH, P696-OH, P705-OH

#686-707: DVGQMGPPGPPPGPRGPSGAPPGA

| Ion        | charge state | Theoretical m/z (mono) | Experimental m/z (mono) | Mass error (Da) | Mass error (PPM) |
|------------|--------------|------------------------|-------------------------|-----------------|------------------|
| [M+2H]+3OH | 2            | 1002.4656              | 1002.4658               | 0.0004          | 0.2              |
| a2         | 1            | 187.1077               | 187.1075                | -0.0002         | -1.1             |
| b2         | 1            | 215.1026               | 215.1023                | -0.0003         | -1.4             |
| y3+OH      | 1            | 260.1241               | 260.1238                | -0.0003         | -1.2             |
| b4         | 1            | 400.1827               | 400.1818                | -0.0009         | -2.3             |
| y13+2OH    | 2            | 575.2860               | 575.2855                | -0.0010         | -0.9             |
| y16+3OH    | 2            | 708.8469               | 708.8464                | -0.0010         | -0.7             |
| y10+OH     | 1            | 882.4428               | 882.4437                | 0.0009          | 1.0              |
| y11+OH     | 1            | 939.4643               | 939.4666                | 0.0023          | 2.5              |
| y12+2OH    | 1            | 1052.5119              | 1052.5095               | -0.0024         | -2.3             |
| y13+2OH    | 1            | 1149.5647              | 1149.5647               | 0.0000          | 0.0              |
| y14+2OH    | 1            | 1206.5862              | 1206.5857               | -0.0005         | -0.4             |
| y15+3OH    | 1            | 1319.6339              | 1319.6313               | -0.0026         | -2.0             |
| y16+3OH    | 1            | 1416.6866              | 1416.6858               | -0.0008         | -0.6             |
| y17+3OH    | 1            | 1473.7081              | 1473.7072               | -0.0009         | -0.6             |
| y18+3OH    | 1            | 1604.7486              | 1604.7391               | -0.0095         | -5.9             |
| a19+2OH    | 1            | 1716.8122              | 1716.8086               | -0.0036         | -2.1             |

4\_5\_2012Col5a1\_GluCandAspN\_HCD2 #4491 RT: 18.47 AV: 1 NL: 2.53E5

T: FTMS + p NSI d Full ms2 1002.97@hcd35.00 [115.00-2000.00]

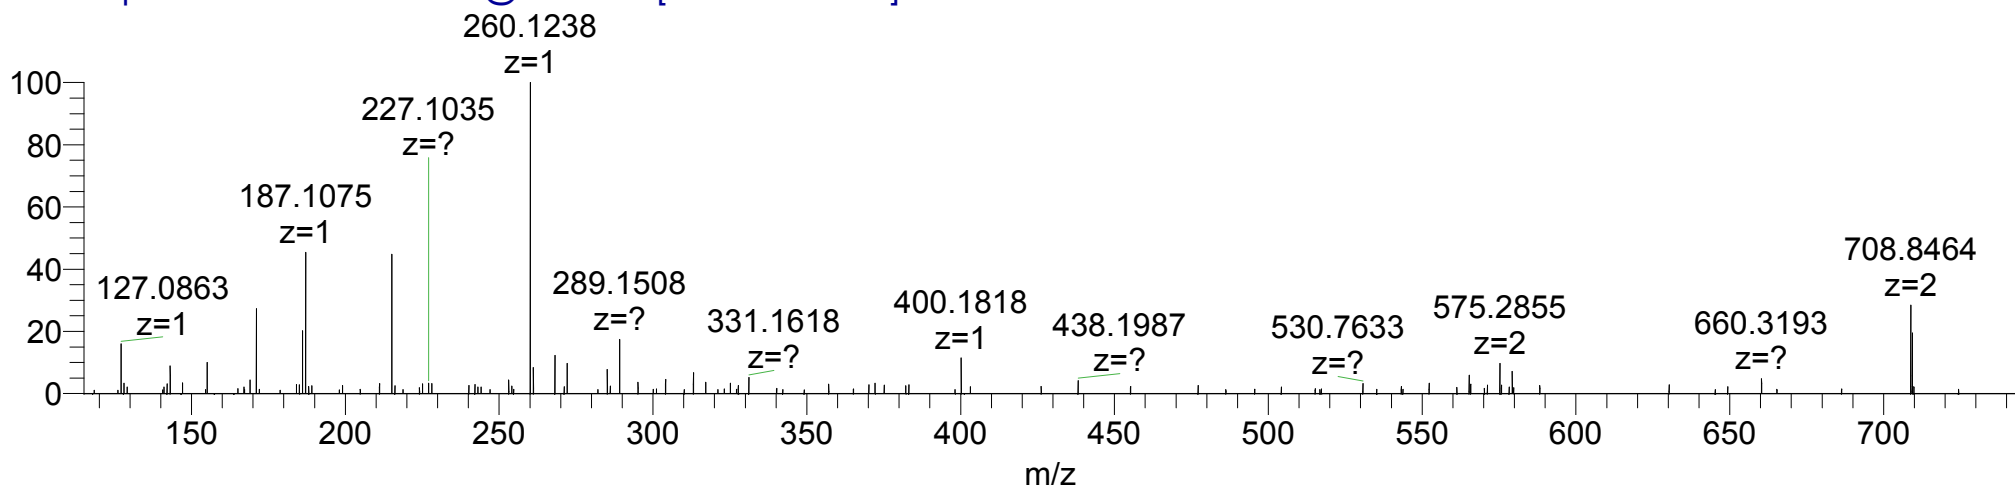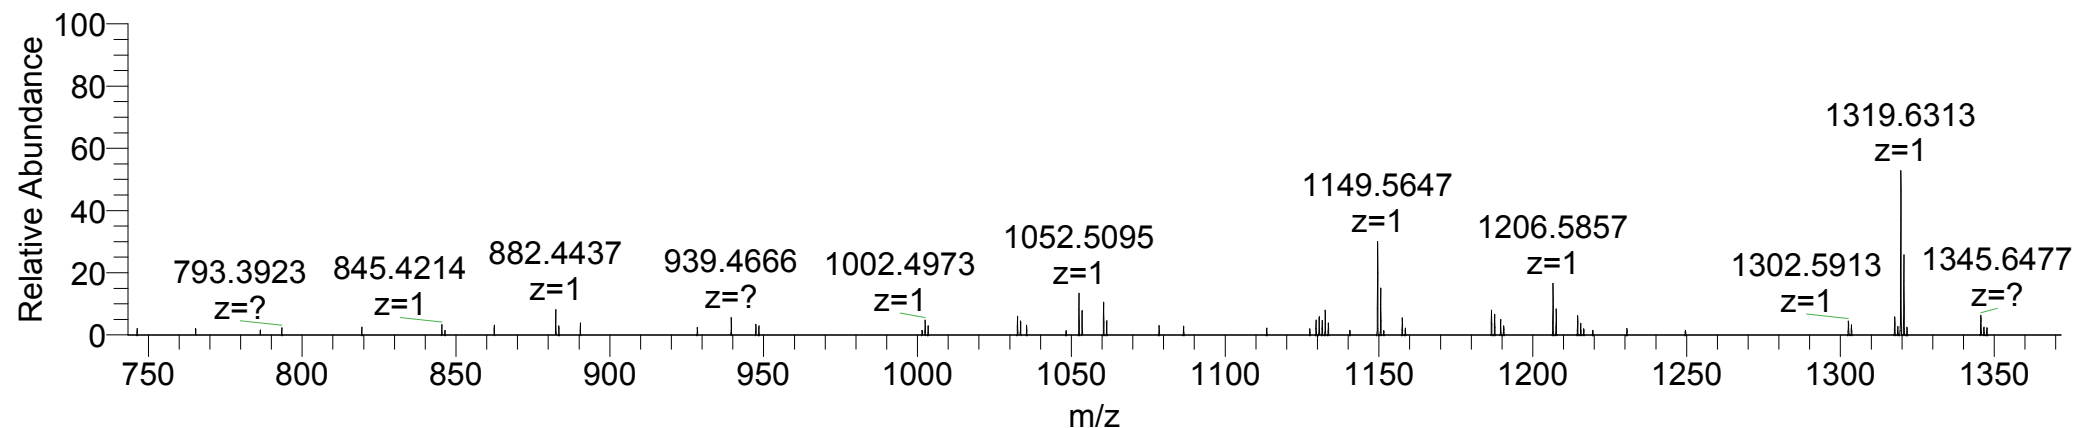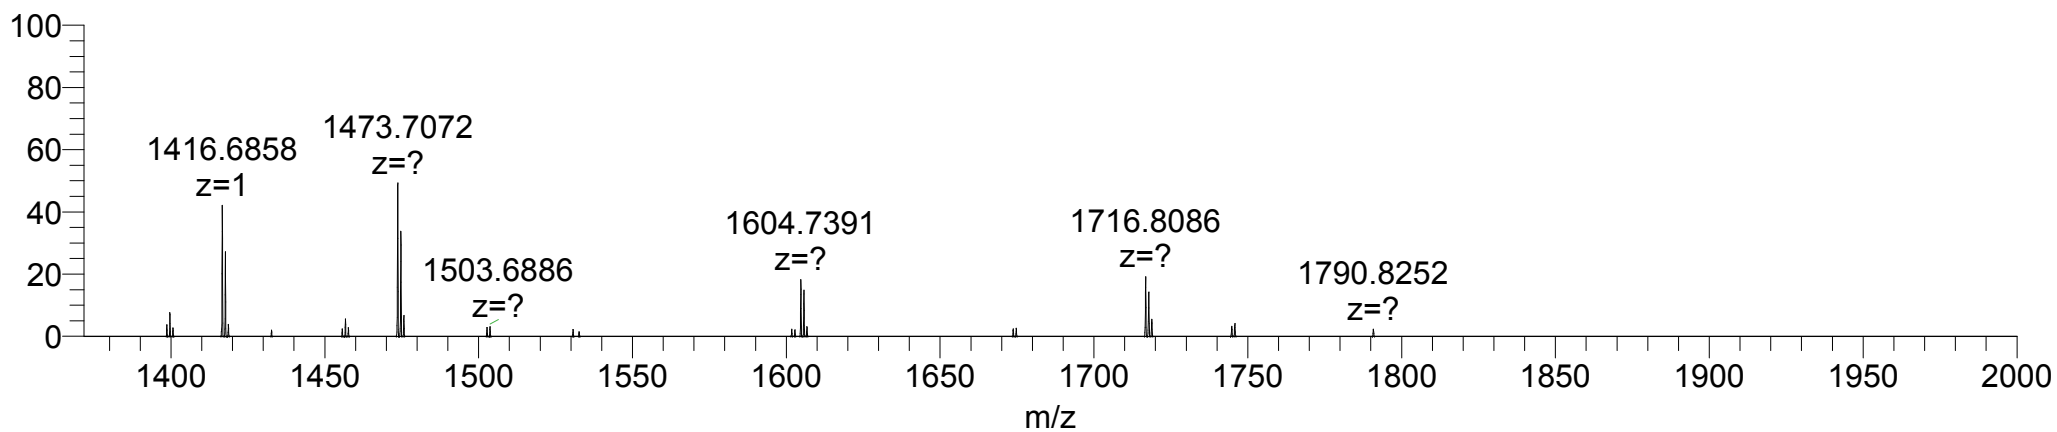

Bovine

44.

P692-OH, P693-OH, P695-OH, P696-OH, P705-OH

#686-707: DVGQMGPPGPGPRGPSGAPGA

| Ion        | charge state | Theoretical m/z (mono) | Experimental m/z (mono) | Mass error (Da) | Mass error (PPM) |
|------------|--------------|------------------------|-------------------------|-----------------|------------------|
| [M+2H]+5OH | 2            | 1018.4605              | 1018.4595               | -0.0020         | -1.0             |
| b2         | 1            | 215.1026               | 215.1024                | -0.0002         | -0.9             |
| y3+OH      | 1            | 260.1241               | 260.1238                | -0.0003         | -1.2             |
| b4         | 1            | 400.1827               | 400.1827                | 0.0000          | 0.0              |
| y16+5OH    | 2            | 724.8419               | 724.8407                | -0.0024         | -1.7             |
| y10+OH     | 1            | 882.4428               | 882.4428                | 0.0000          | 0.0              |
| y12+2OH    | 1            | 1052.5119              | 1052.5127               | 0.0008          | 0.8              |
| y13+3OH    | 1            | 1165.5596              | 1165.5571               | -0.0025         | -2.1             |
| y14+3OH    | 1            | 1222.5811              | 1222.5786               | -0.0025         | -2.0             |
| y15+4OH    | 1            | 1335.6288              | 1335.6268               | -0.0020         | -1.5             |
| y16+5OH    | 1            | 1448.6764              | 1448.6752               | -0.0012         | -0.8             |
| y17+5OH    | 1            | 1505.6979              | 1505.6979               | 0.0000          | 0.0              |
| y18+5OH    | 1            | 1636.7384              | 1636.7377               | -0.0007         | -0.4             |
| a19+4OH    | 1            | 1748.8021              | 1748.7988               | -0.0033         | -1.9             |

4\_5\_2012Col5a1\_AspN\_HCD2 #3337 RT: 14.94 AV: 1 NL: 1.78E5

T: FTMS + p NSI d Full ms2 1018.96@hcd35.00 [115.00-2000.00]

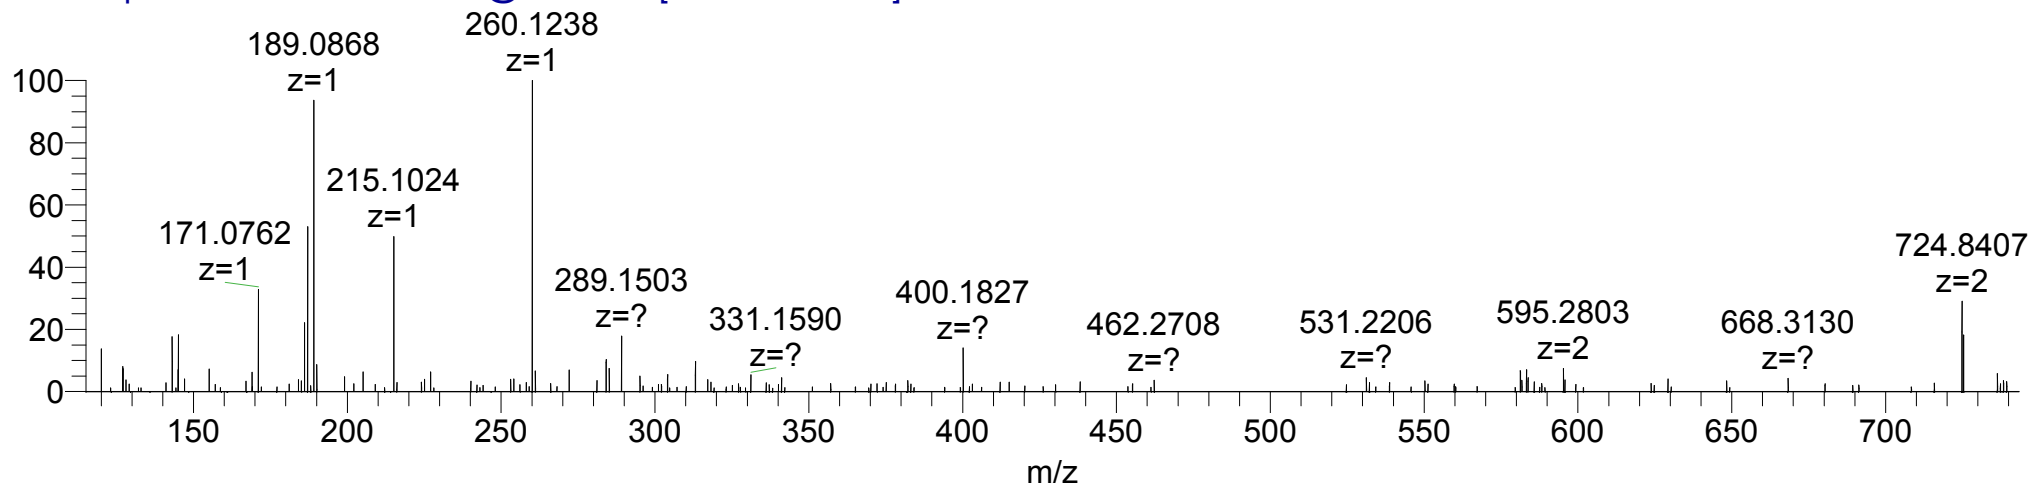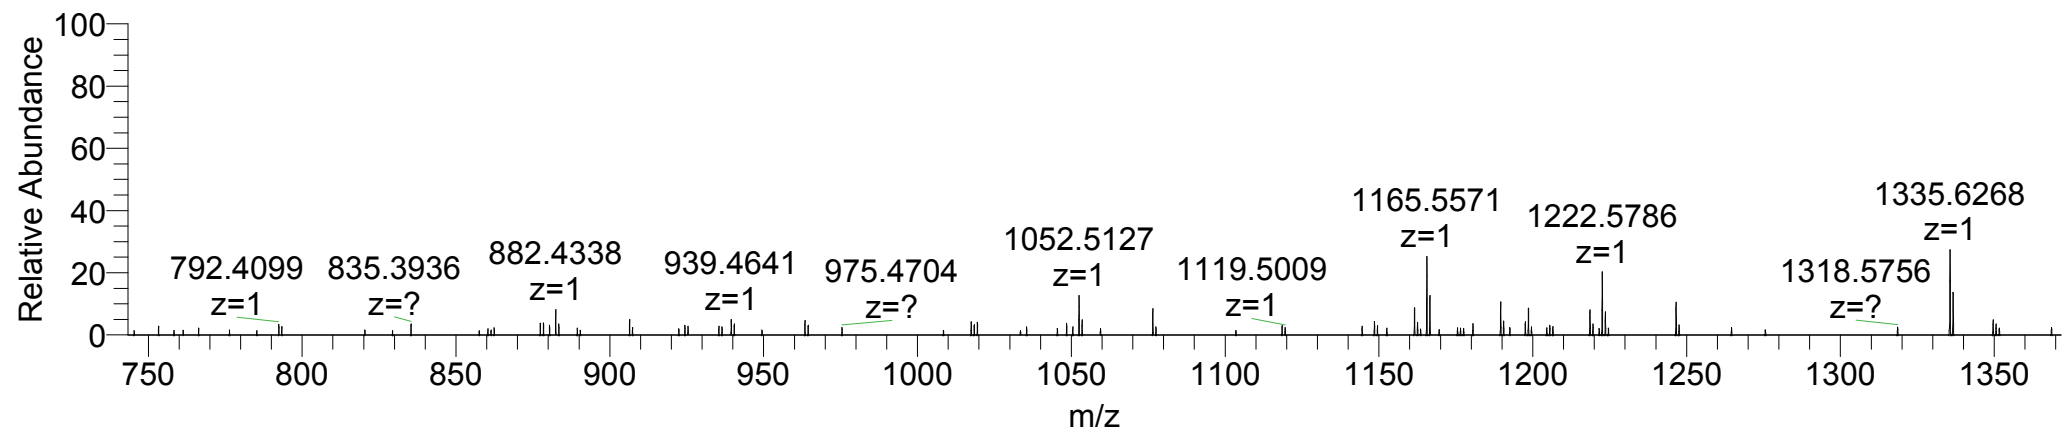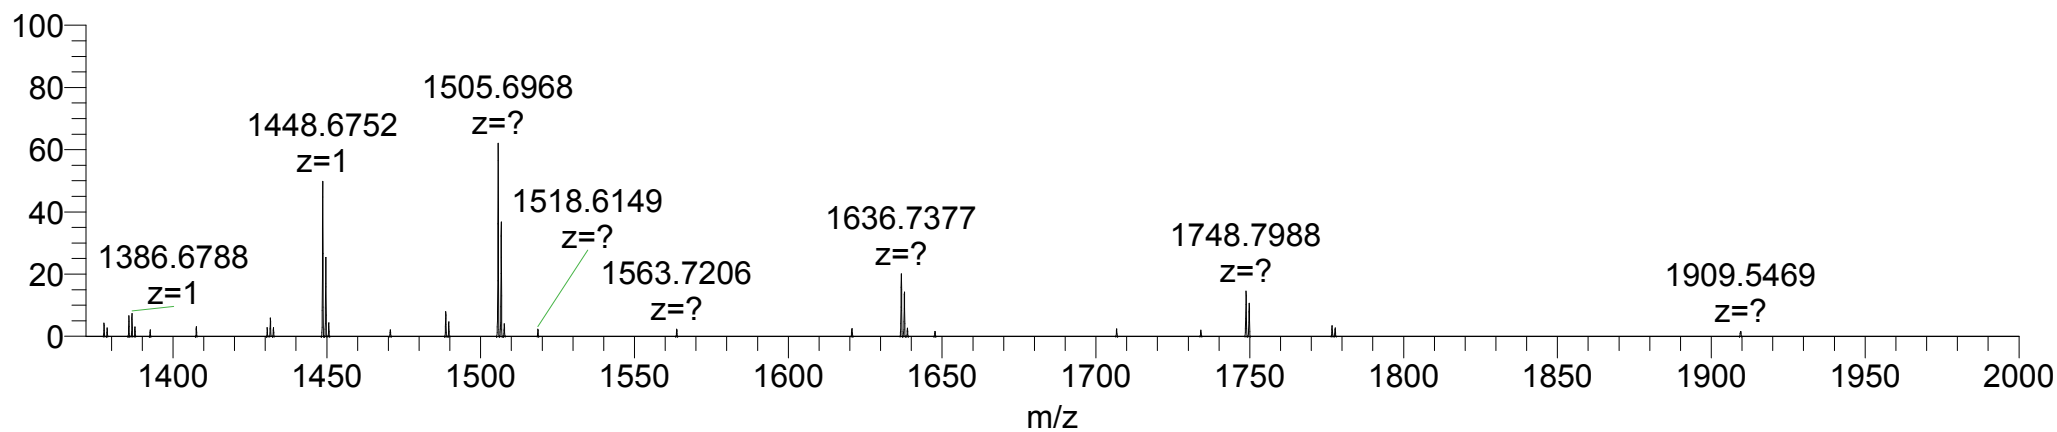

Bovine

**45.**

**P720-OH**

#708-725: DGPQGPPGGIGNPGAVGE

| Ion                 | charge state | Theoretical m/z (mono) | Experimental m/z (mono) | Mass error (Da) | Mass error (PPM) |
|---------------------|--------------|------------------------|-------------------------|-----------------|------------------|
| [M+2H]+2OH          | 2            | 804.3684               | 804.3658                | -0.0052         | -3.2             |
| y1                  | 1            | 148.0604               | 148.0605                | 0.0001          | 0.7              |
| y2                  | 1            | 205.0819               | 205.0821                | 0.0002          | 1.0              |
| a3/PGA+OH           | 1            | 242.1135               | 242.1137                | 0.0002          | 0.8              |
| NPG+OH              | 1            | 285.1193               | 285.1197                | 0.0004          | 1.4              |
| y3                  | 1            | 304.1503               | 304.1505                | 0.0002          | 0.7              |
| PGGI+OH/<br>PGAV+OH | 1            | 341.1819               | 341.1823                | 0.0004          | 1.2              |
| b5                  | 1            | 455.1885               | 455.1884                | -0.0001         | -0.2             |
| y6+OH               | 1            | 545.2566               | 545.2565                | -0.0001         | -0.2             |
| b14+2OH             | 2            | 617.2784               | 617.2795                | 0.0022          | 1.8              |
| b10+OH              | 1            | 892.4159               | 892.4171                | 0.0012          | 1.3              |
| b11+OH              | 1            | 949.4374               | 949.4493                | 0.0119          | 12.5             |
| b12+OH              | 1            | 1063.4803              | 1063.4816               | 0.0013          | 1.2              |
| y13+2OH             | 1            | 1153.5484              | 1153.5465               | -0.0019         | -1.6             |
| y14+2OH             | 1            | 1210.5699              | 1210.5739               | 0.0040          | 3.3              |
| b15+2OH             | 1            | 1304.5866              | 1304.5916               | 0.0050          | 3.8              |

**\*Unlocalized sites: P713-OH?, P714-OH?**

**Pseudolocalized sites: P714-OH**

2\_24\_2012Col5a1\_Bovine\_AspNGluC\_2 #2000 RT: 17.94 AV: 1 NL: 1.14E5

T: FTMS + p NSI d Full ms2 804.37@hcd30.00 [100.00-1620.00]

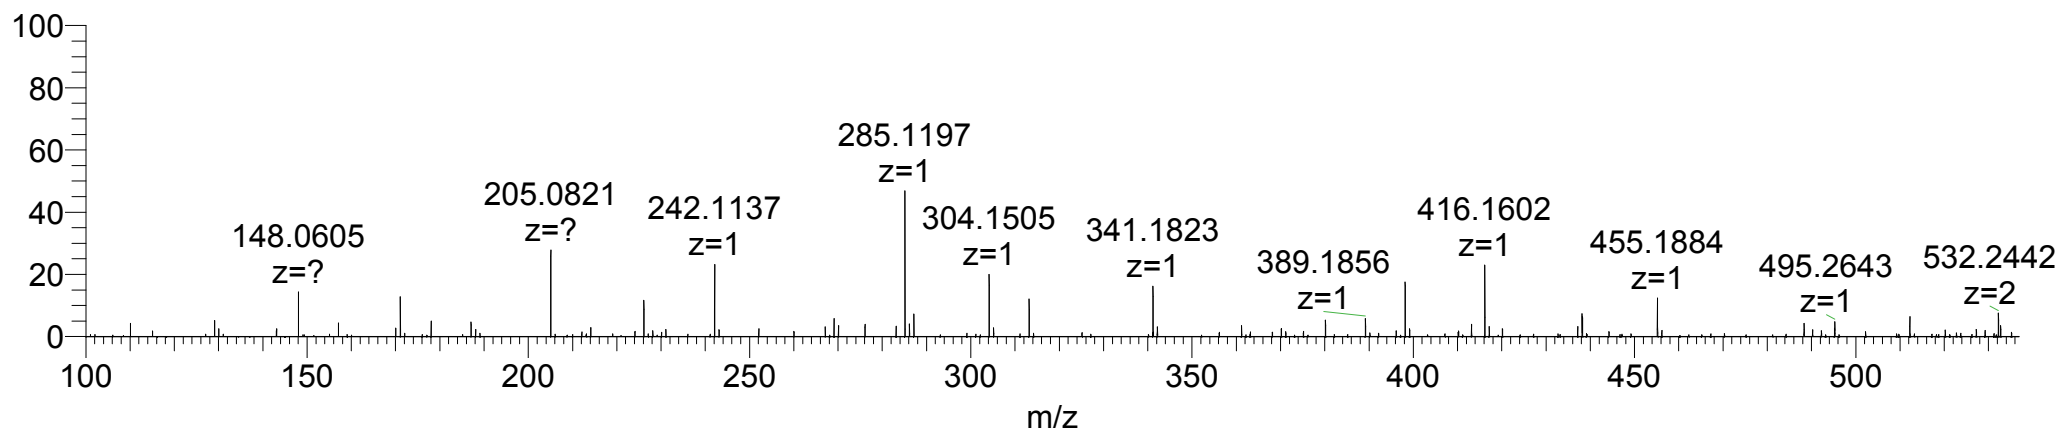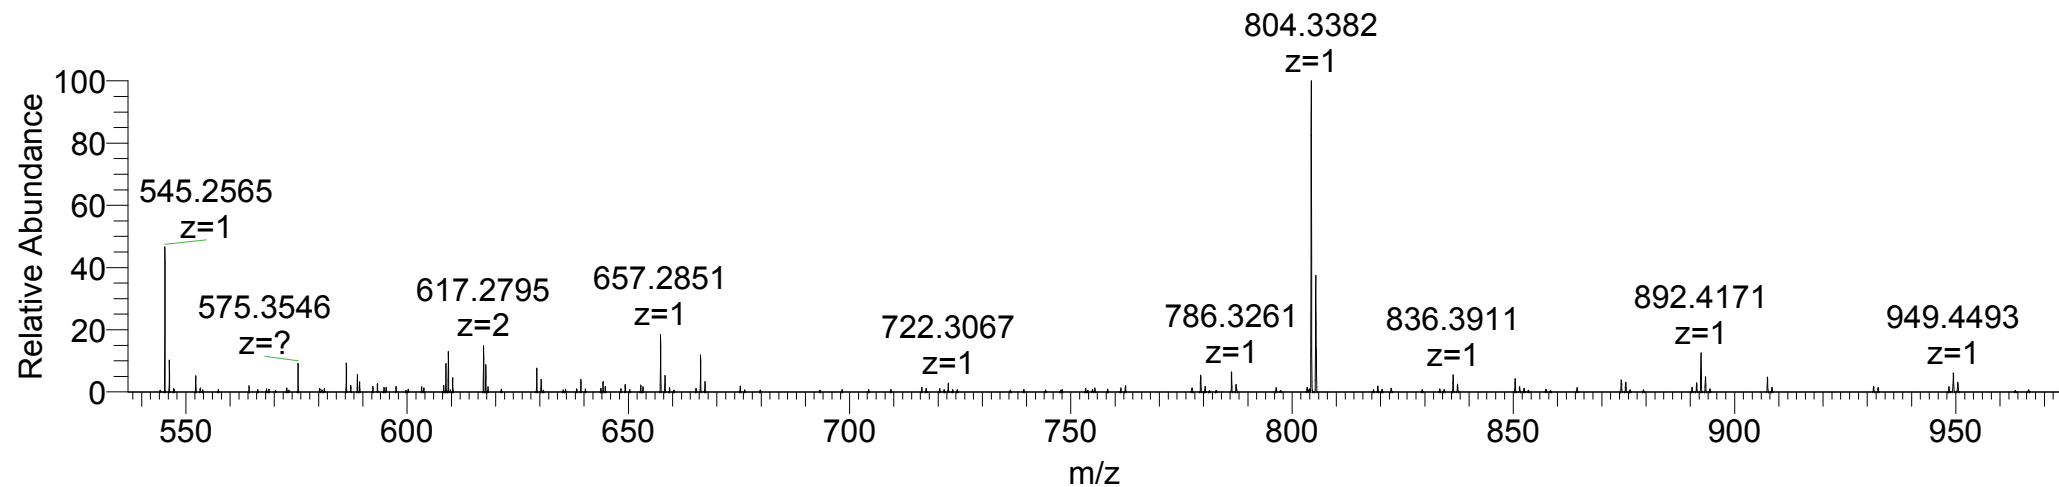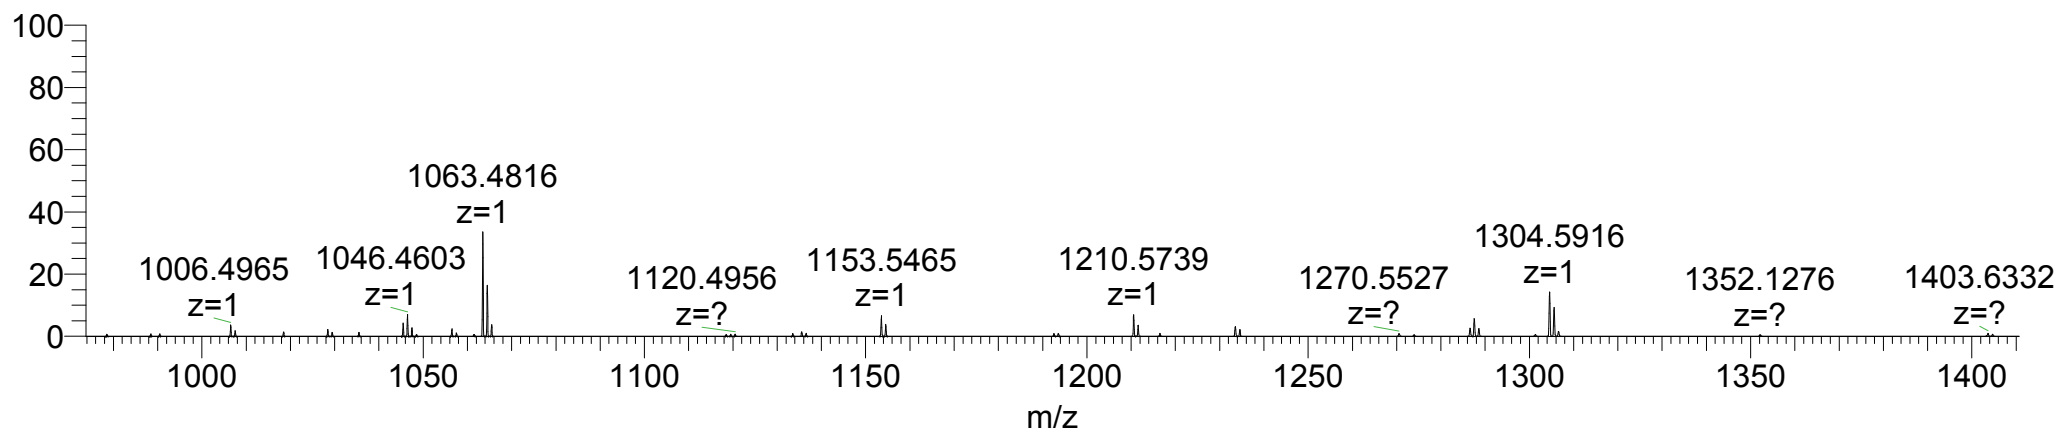

Bovine

46.

**K726-OH.Gal.Glc, P729-OH, P735-OH, P738-OH**

#726-740: KGEPGEAGEPGLPGE

| Ion                | charge state | Theoretical m/z (mono) | Experimental m/z (mono) | Mass error (Da) | Mass error (PPM) |
|--------------------|--------------|------------------------|-------------------------|-----------------|------------------|
| [M+2H]+4OH+Gal.Glc | 2            | 906.3813               | 906.3818                | 0.0010          | 0.6              |
| PG+OH              | 1            | 171.0764               | 171.0763                | -0.0001         | -0.6             |
| y2                 | 1            | 205.0819               | 205.0819                | 0.0000          | 0.0              |
| y3-H2O+OH/PGE+OH   | 1            | 300.1190               | 300.1189                | -0.0001         | -0.3             |
| y3+OH              | 1            | 318.1296               | 318.1294                | -0.0002         | -0.6             |
| b3+OH              | 1            | 331.1612               | 331.1609                | -0.0003         | -0.9             |
| y6+2OH             | 1            | 601.2828               | 601.2834                | 0.0006          | 1.0              |
| b7+2OH             | 1            | 701.3101               | 701.3093                | -0.0008         | -1.1             |
| b9+2OH             | 1            | 887.3741               | 887.3734                | -0.0007         | -0.8             |
| b11+3OH            | 1            | 1057.4433              | 1057.4430               | -0.0003         | -0.3             |
| a12+3OH            | 1            | 1142.5324              | 1142.5310               | -0.0014         | -1.2             |
| b12+3OH            | 1            | 1170.5273              | 1170.5260               | -0.0013         | -1.1             |



4\_5\_2012Col5a1\_GluC\_HCD1 #2388 RT: 15.94 AV: 1 NL: 2.33E5

T: FTMS + p NSI d Full ms2 906.38@hcd35.00 [115.00-1825.00]

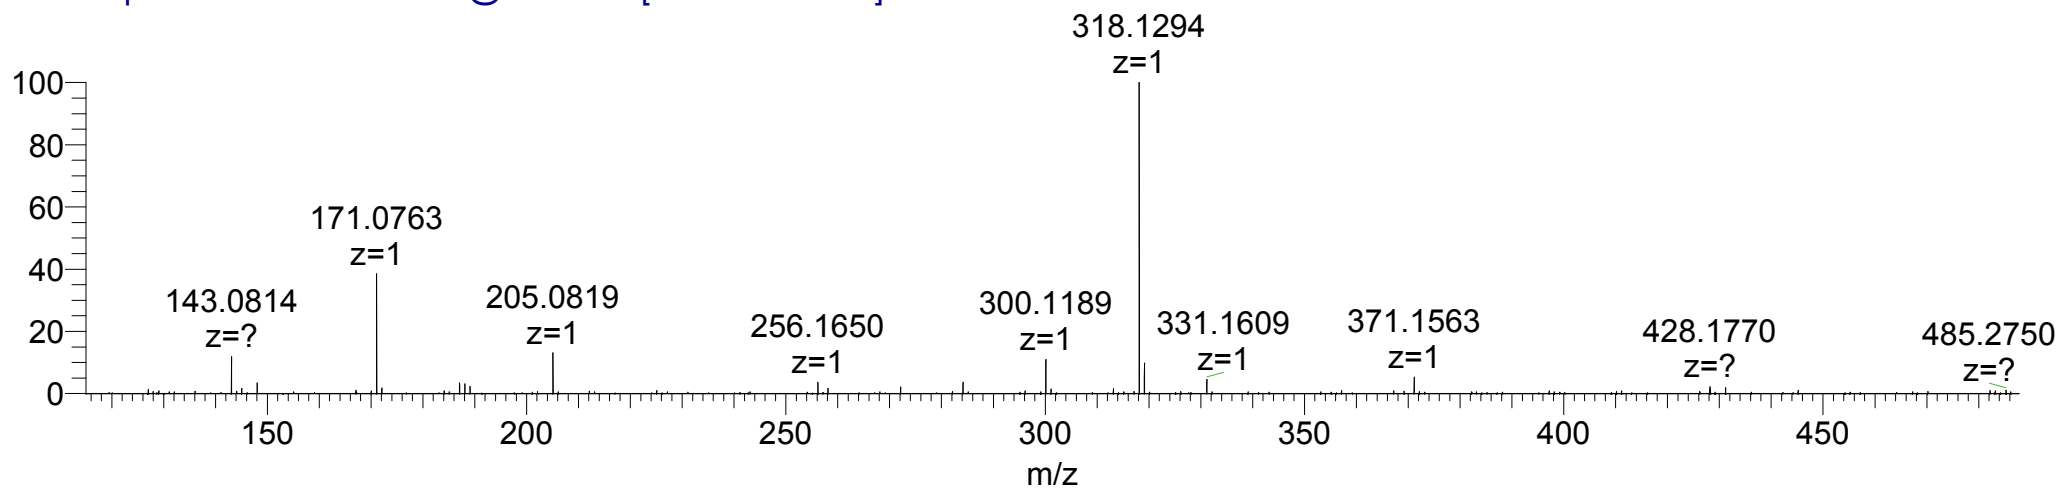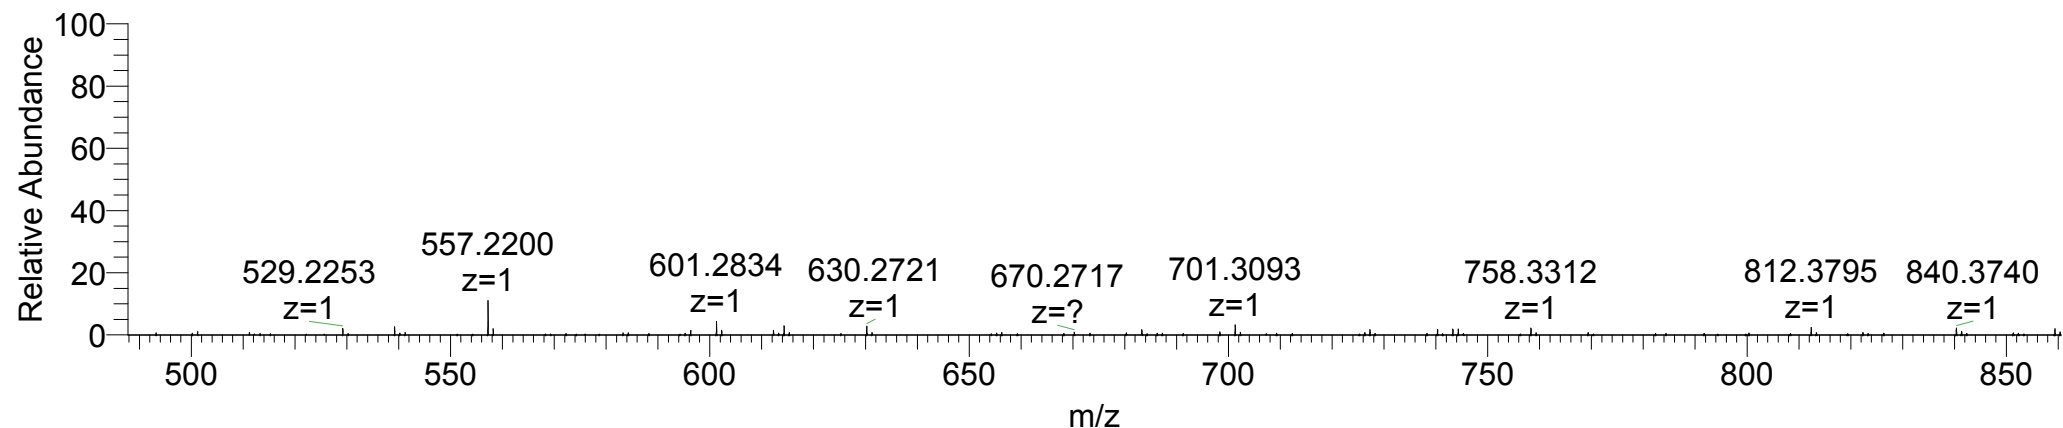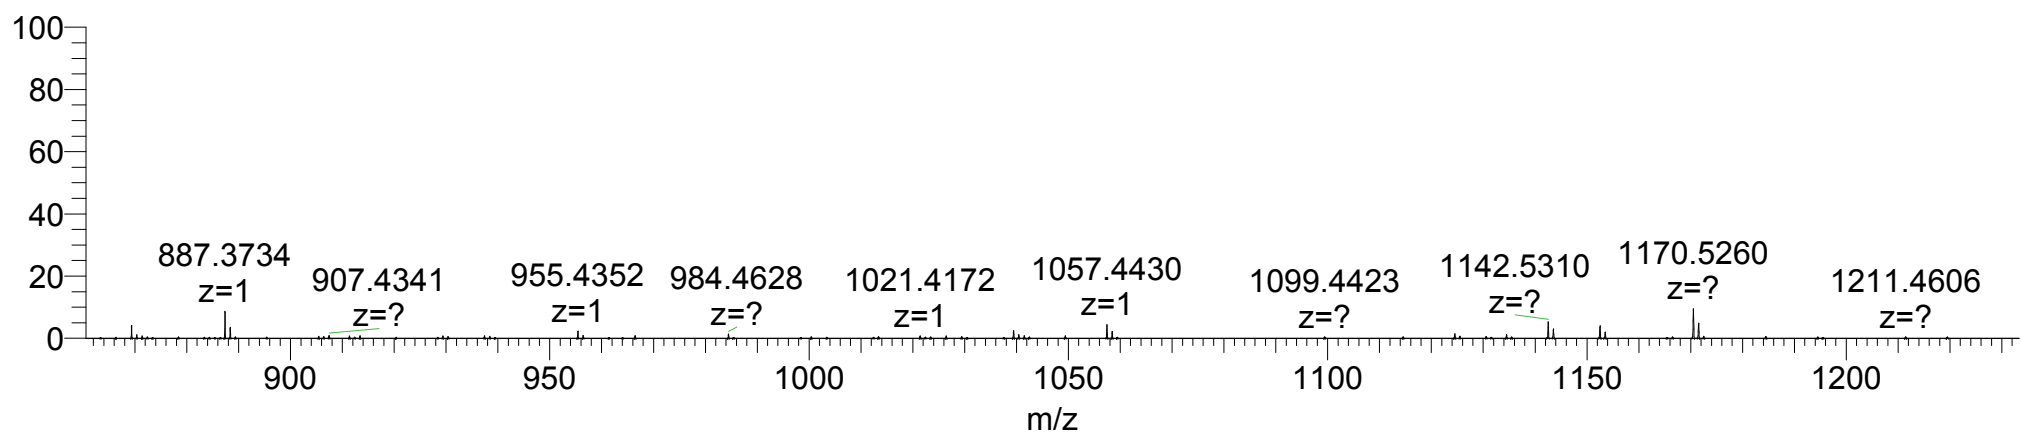

Bovine

47.

**P729-OH, P735-OH, P738-OH, K747-OH.Gal.Glc**

#727-750: GEPGEAGEPGLPGEGGPPGPKGER

| Ion                | charge state | Theoretical m/z (mono) | Experimental m/z (mono) | Mass error (Da) | Mass error (PPM) |
|--------------------|--------------|------------------------|-------------------------|-----------------|------------------|
| [M+2H]+5OH+Gal.Glc | 2            | 1316.5727              | 1316.5756               | 0.0058          | 2.2              |
| GP+OH              | 1            | 171.0764               | 171.0761                | -0.0003         | -1.8             |
| b3/EPG+OH          | 1            | 300.1190               | 300.1185                | -0.0005         | -1.7             |
| y3                 | 1            | 361.1830               | 361.1826                | -0.0004         | -1.1             |
| PGEA+OH            | 1            | 371.1561               | 371.1557                | -0.0004         | -1.1             |
| AGEPG+OH           | 1            | 428.1776               | 428.1776                | 0.0000          | 0.0              |
| a6/PGEAGE-28+OH    | 1            | 529.2253               | 529.2241                | -0.0012         | -2.3             |
| b6+OH/PGEAGE+OH    | 1            | 557.2202               | 557.2192                | -0.0010         | -1.8             |
| y13+3OH            | 2            | 641.8047               | 641.8038                | -0.0018         | -1.4             |
| b8+OH              | 1            | 743.2842               | 743.2799                | -0.0043         | -5.8             |
| y16+4OH            | 2            | 783.3814               | 783.3807                | -0.0014         | -0.9             |
| y8+2OH             | 1            | 869.4476               | 869.4456                | -0.0020         | -2.3             |
| y9+2OH             | 1            | 926.4690               | 926.4645                | -0.0045         | -4.9             |
| y10+2OH            | 1            | 983.4905               | 983.4891                | -0.0014         | -1.4             |
| y22+5OH            | 2            | 1061.4878              | 1061.4834               | -0.0088         | -4.1             |
| y13+3OH            | 1            | 1282.6022              | 1282.6000               | -0.0022         | -1.7             |
| y16+4OH            | 1            | 1565.7554              | 1565.7535               | -0.0019         | -1.2             |
| y13+3OH+Gal.Glc    | 1            | 1606.7079              | 1606.7009               | -0.0070         | -4.4             |
| y16+4OH+Gal.Glc    | 1            | 1889.8611              | 1889.8580               | -0.0031         | -1.6             |

**\*Unlocalized sites: P744-OH?, P746-OH?**

**Pseudolocalized sites: P744-OH**

4\_5\_2012Col5a1\_Trypsin\_nontrapping\_HCD1 #5839 RT: 46.63 AV: 1 NL: 1.57E4

T: FTMS + p NSI d Full ms2 1317.08@hcd35.00 [115.00-2000.00]

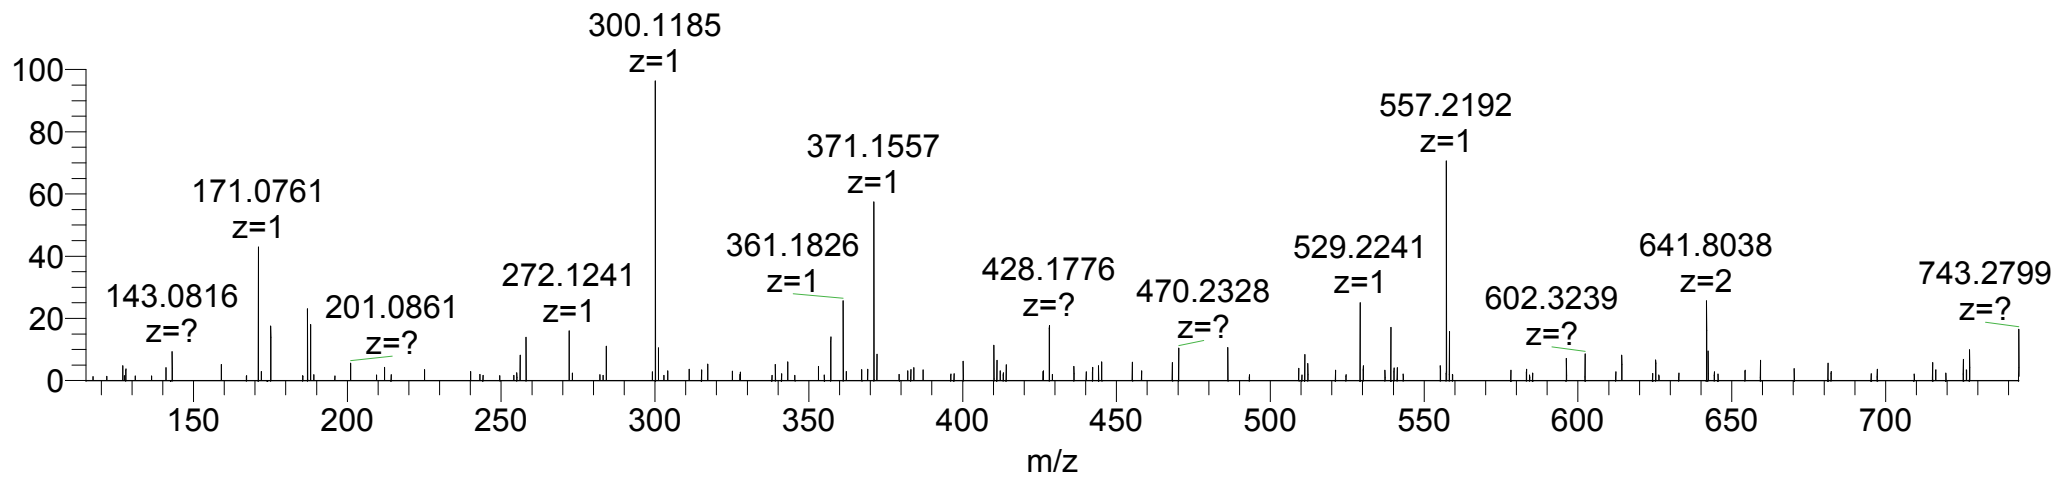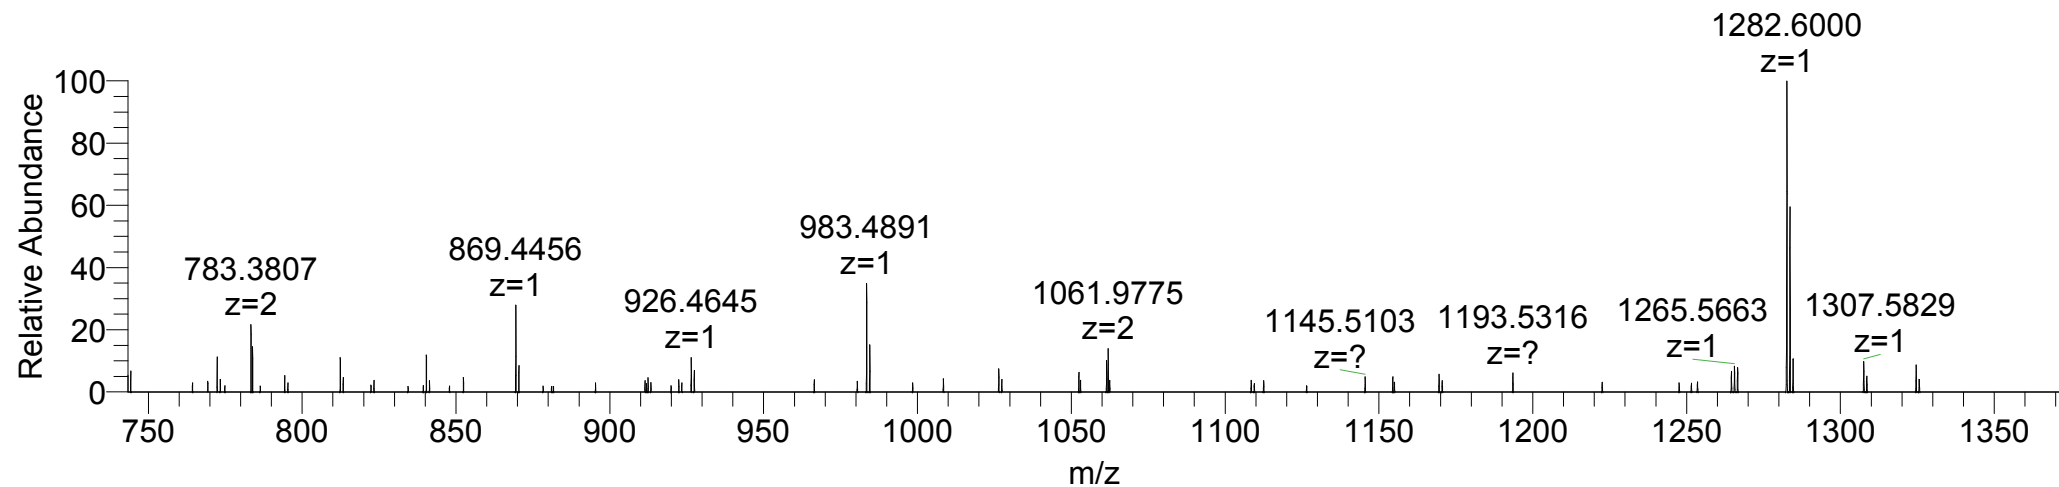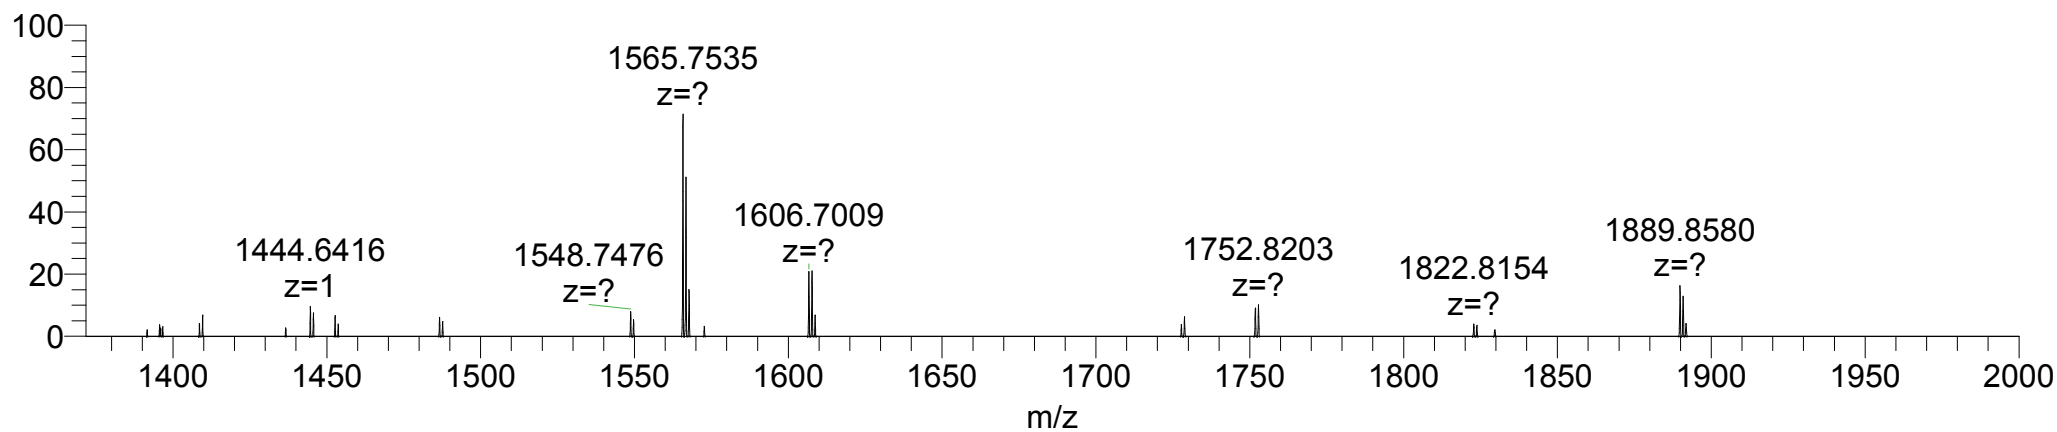

Bovine

48.

P735-OH, P738-OH, P744-OH, K747-OH.Gal.Glc

#732-749: AGEPGLPGEGGPPGPKKGE

| Ion                | charge state | Theoretical m/z (mono) | Experimental m/z (mono) | Mass error (Da) | Mass error (PPM) |
|--------------------|--------------|------------------------|-------------------------|-----------------|------------------|
| [M+2H]+4OH+Gal.Glc | 2            | 995.9342               | 995.9341                | -0.0002         | -0.1             |
| PG+OH              | 1            | 171.0764               | 171.0762                | -0.0002         | -1.2             |
| GLP-28+OH          | 1            | 256.1656               | 256.1653                | -0.0003         | -1.2             |
| GLP+OH             | 1            | 284.1605               | 284.1603                | -0.0002         | -0.7             |
| GEP+OH             | 1            | 300.1190               | 300.1184                | -0.0006         | -2.0             |
| b5+OH              | 1            | 428.1776               | 428.1754                | -0.0022         | -5.2             |
| y4+OH              | 1            | 446.2245               | 446.2248                | 0.0003          | 0.7              |
| b6+OH              | 1            | 541.2617               | 541.2618                | 0.0001          | 0.2              |
| y6+2OH             | 1            | 616.2937               | 616.2929                | -0.0008         | -1.3             |
| y7+2OH             | 1            | 713.3464               | 713.3457                | -0.0007         | -1.0             |
| y8+2OH             | 1            | 770.3679               | 770.3632                | -0.0047         | -6.1             |
| y9+2OH             | 1            | 827.3894               | 827.3889                | -0.0005         | -0.6             |
| PEGGGPPGPK+3OH     | 1            | 922.4265               | 922.4233                | -0.0032         | -3.5             |
| y11+2OH            | 1            | 1013.4534              | 1013.4547               | 0.0013          | 1.3              |
| y12-H2O+3OH        | 1            | 1108.4905              | 1108.4904               | -0.0001         | -0.1             |
| y12+3OH            | 1            | 1126.5011              | 1126.5009               | -0.0002         | -0.2             |
| y15+4OH            | 1            | 1409.6543              | 1409.6556               | 0.0013          | 0.9              |

4\_5\_2012Col5a1\_GluC\_HCD2 #2434 RT: 16.26 AV: 1 NL: 1.02E5

T: FTMS + p NSI d Full ms2 996.44@hcd35.00 [115.00-2000.00]

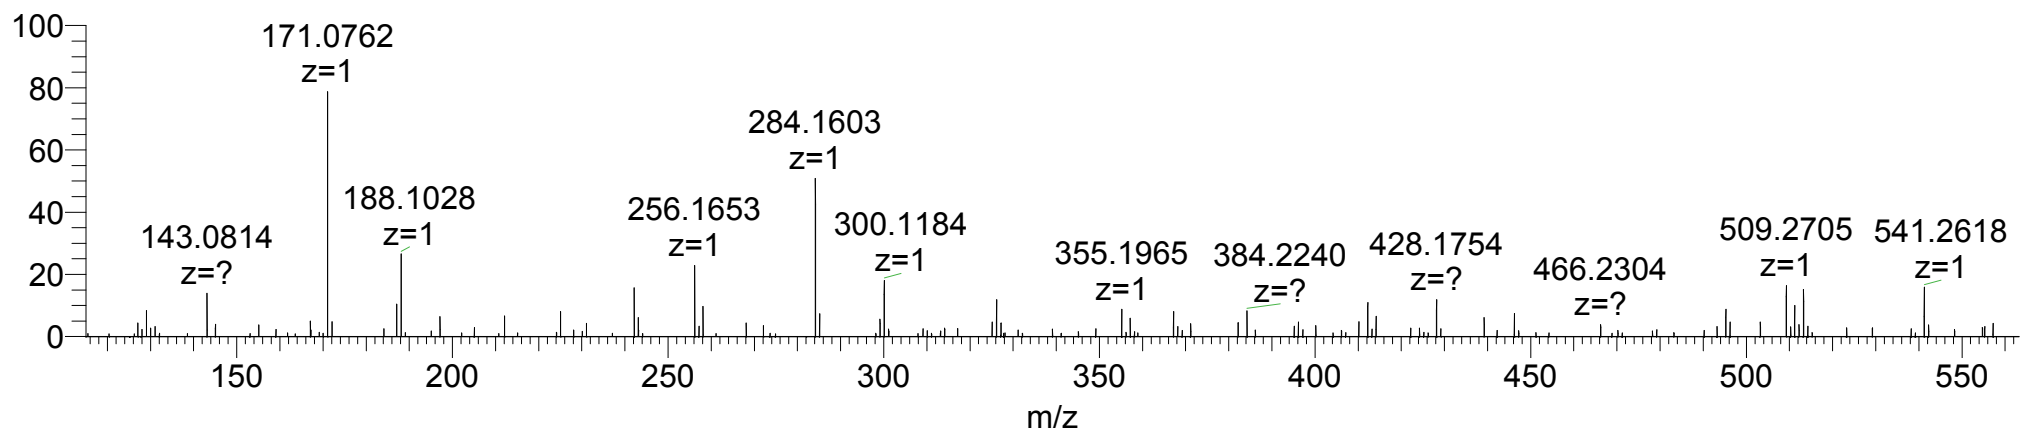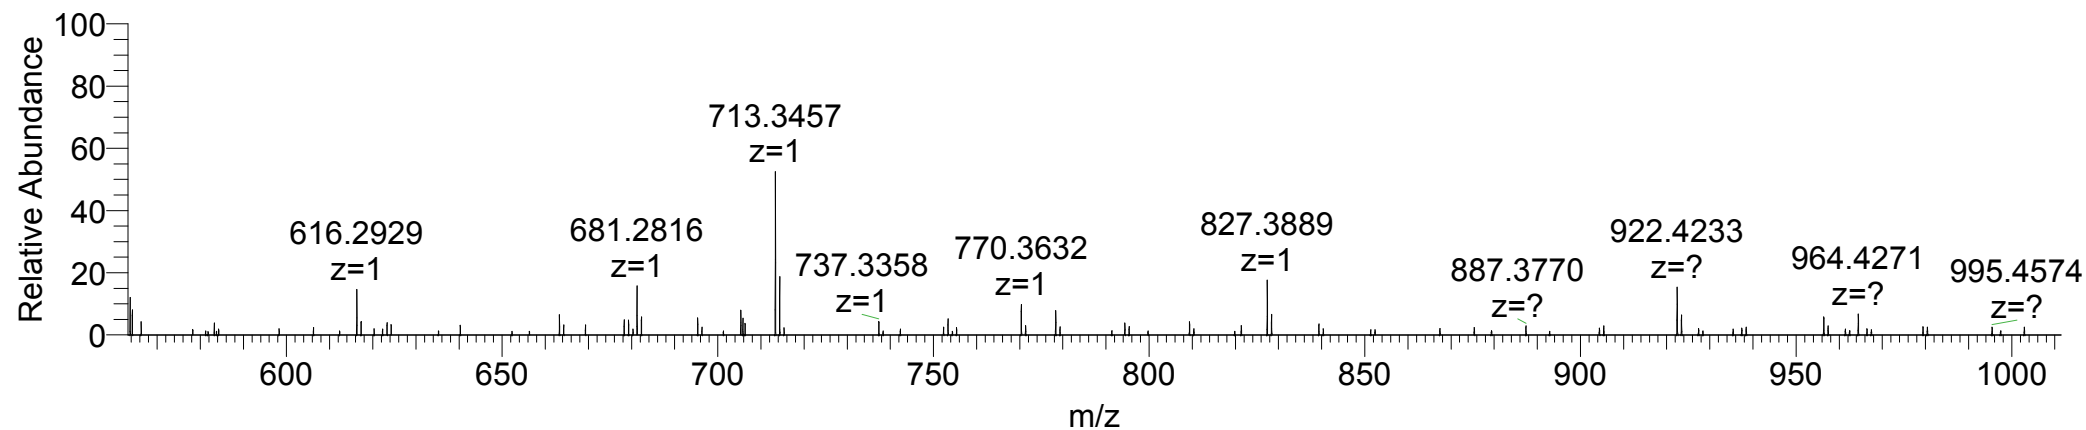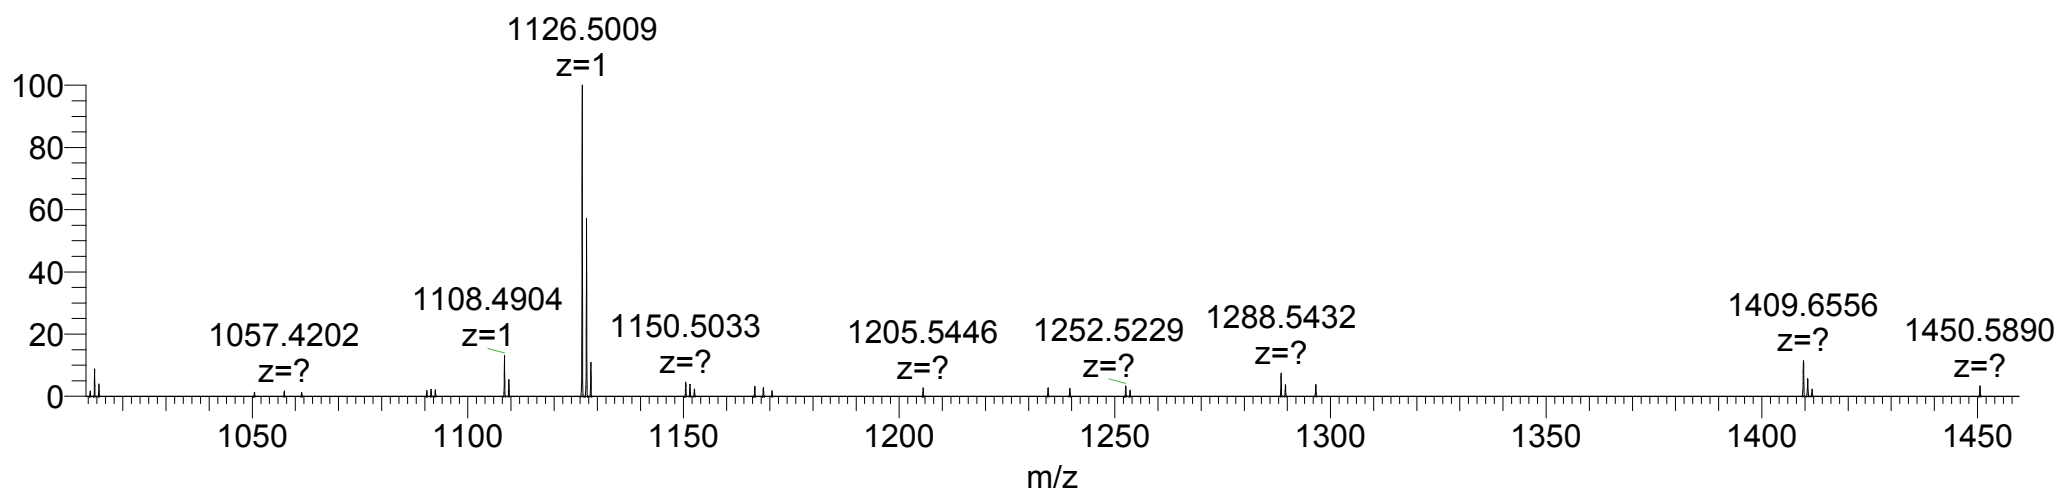

Bovine

49.

**K753-OH.Gal.Glc, P765-OH**

#751-765: GEKGESGPSGAAGPPGGPK

MS<sup>2</sup>: GEKGESGPSGAAGPPGGPK

| Ion                          | charge state | Theoretical m/z (mono) | Experimental m/z (mono) | Mass error (Da) | Mass error (PPM) |
|------------------------------|--------------|------------------------|-------------------------|-----------------|------------------|
| [M+2H]+2OH+Gal.Glc           | 2            | 968.4369               | 968.4395                | 0.0052          | 2.7              |
| y4+OH                        | 1            | 414.2347               | 414.2373                | 0.0026          | 6.3              |
| y5+OH                        | 1            | 511.2875               | 511.2903                | 0.0028          | 5.5              |
| y6+OH                        | 1            | 568.3089               | 568.3118                | 0.0029          | 5.1              |
| y7+OH                        | 1            | 639.3461               | 639.3494                | 0.0033          | 5.2              |
| y16+2OH                      | 2            | 713.3512               | 713.3561                | 0.0098          | 6.9              |
| [M+2H]+2OH(MS <sup>3</sup> ) | 2            | 806.3890               | 806.3841                | -0.0098         | -6.1             |
| [M+2H]+2OH+Gal               | 2            | 887.4105               | 887.4158                | 0.0106          | 6.0              |
| y11+OH                       | 1            | 951.4894               | 951.4953                | 0.0059          | 6.2              |
| y12+OH                       | 1            | 1008.5109              | 1008.5172               | 0.0063          | 6.3              |
| y13+OH                       | 1            | 1095.5429              | 1095.5483               | 0.0054          | 4.9              |
| y14+OH                       | 1            | 1224.5855              | 1224.5927               | 0.0072          | 5.9              |
| y15+OH                       | 1            | 1281.6070              | 1281.6145               | 0.0075          | 5.9              |
| [M+H]+2OH                    | 1            | 1611.7609              | 1611.7710               | 0.0101          | 6.3              |

MS<sup>3</sup>: GEKGESGPSGAAGPPGGPK

| Ion            | charge state | Theoretical m/z (mono) | Experimental m/z (mono) | Mass error (Da) | Mass error (PPM) |
|----------------|--------------|------------------------|-------------------------|-----------------|------------------|
| y2             | 1            | 244.1656               | 244.1662                | 0.0006          | 2.5              |
| b4-H2O/GPSGA   | 1            | 370.1721               | 370.1732                | 0.0011          | 3.0              |
| y4+OH          | 1            | 414.2347               | 414.2356                | 0.0009          | 2.2              |
| y5+OH          | 1            | 511.2875               | 511.2884                | 0.0009          | 1.8              |
| b5+OH          | 1            | 517.2253               | 517.2265                | 0.0012          | 2.3              |
| y6+OH          | 1            | 568.3089               | 568.3098                | 0.0009          | 1.6              |
| b6             | 1            | 604.2573               | 604.2584                | 0.0011          | 1.8              |
| /EKGESG+OH     |              |                        |                         |                 |                  |
| y7+OH          | 1            | 639.3461               | 639.3474                | 0.0013          | 2.0              |
| y16-H2O+2OH    | 2            | 704.3468               | 704.3494                | 0.0052          | 3.7              |
| y16+2OH        | 2            | 713.3521               | 713.3536                | 0.0030          | 2.1              |
| y9+OH          | 1            | 767.4046               | 767.4073                | 0.0027          | 3.5              |
| [M+2H]-H2O+2OH | 2            | 797.3788               | 797.3812                | 0.0048          | 3.0              |
| [M+2H]+2OH     | 2            | 806.3841               | 806.3859                | 0.0036          | 2.2              |
| y11+OH         | 1            | 951.4894               | 951.4920                | 0.0026          | 2.7              |
| y12+OH         | 1            | 1008.5109              | 1008.5143               | 0.0034          | 3.4              |
| b12+OH         | 1            | 1044.4592              | 1044.4607               | 0.0015          | 1.4              |
| y13+OH         | 1            | 1095.5429              | 1095.5448               | 0.0019          | 1.7              |

Bovine

|        |   |           |           |        |     |
|--------|---|-----------|-----------|--------|-----|
| y14+OH | 1 | 1224.5855 | 1224.5855 | 0.0000 | 0.0 |
| y15+OH | 1 | 1281.6070 | 1281.6110 | 0.0040 | 3.1 |

2\_2\_2012Col5a1\_Bovine\_Top5MS3 #427 RT: 5.69 AV: 1 NL: 5.88E5

T: FTMS + p NSI d Full ms2 968.44@cid35.00 [255.00-1950.00]

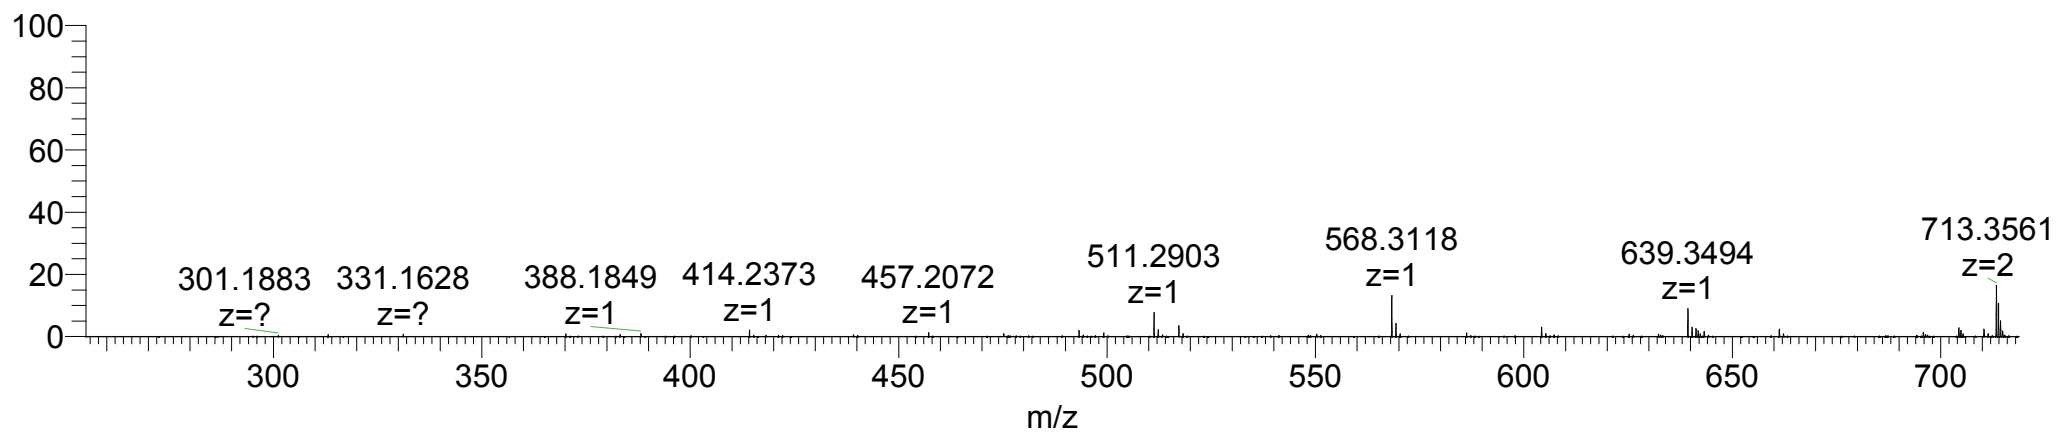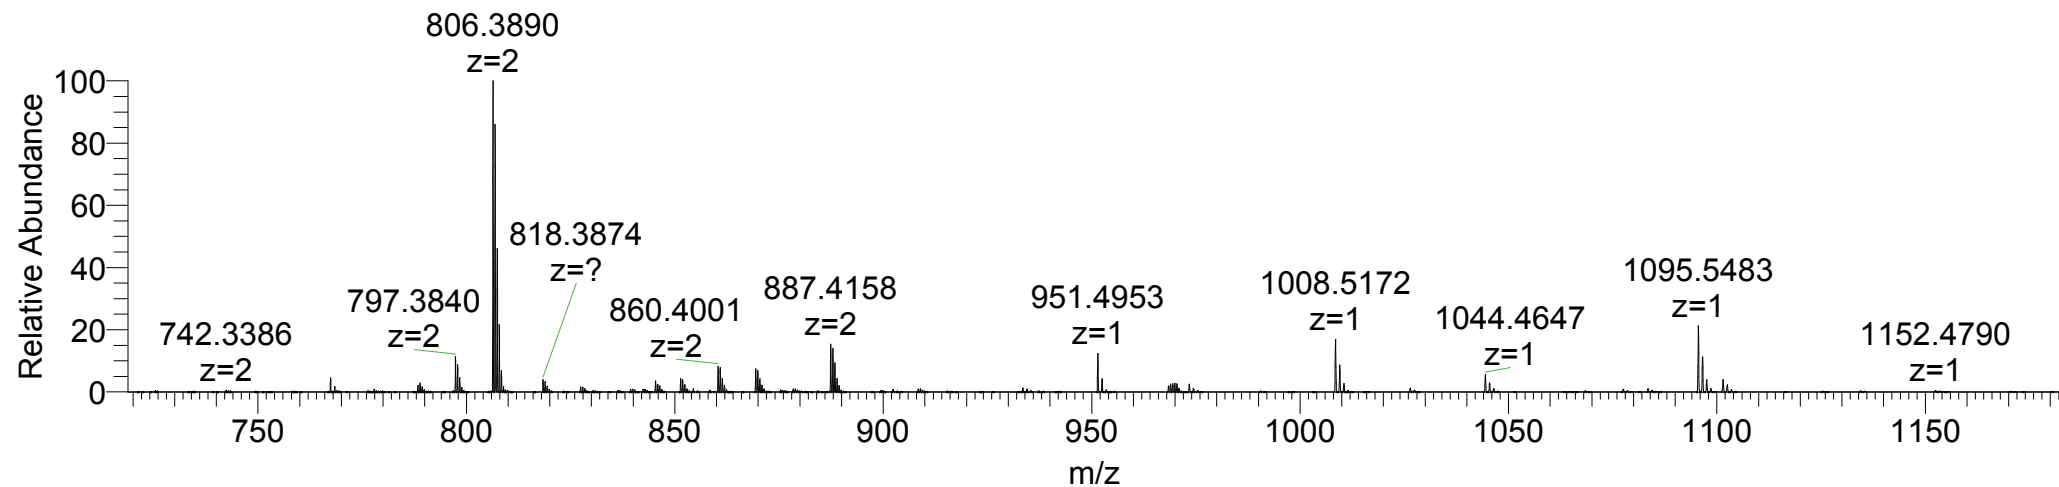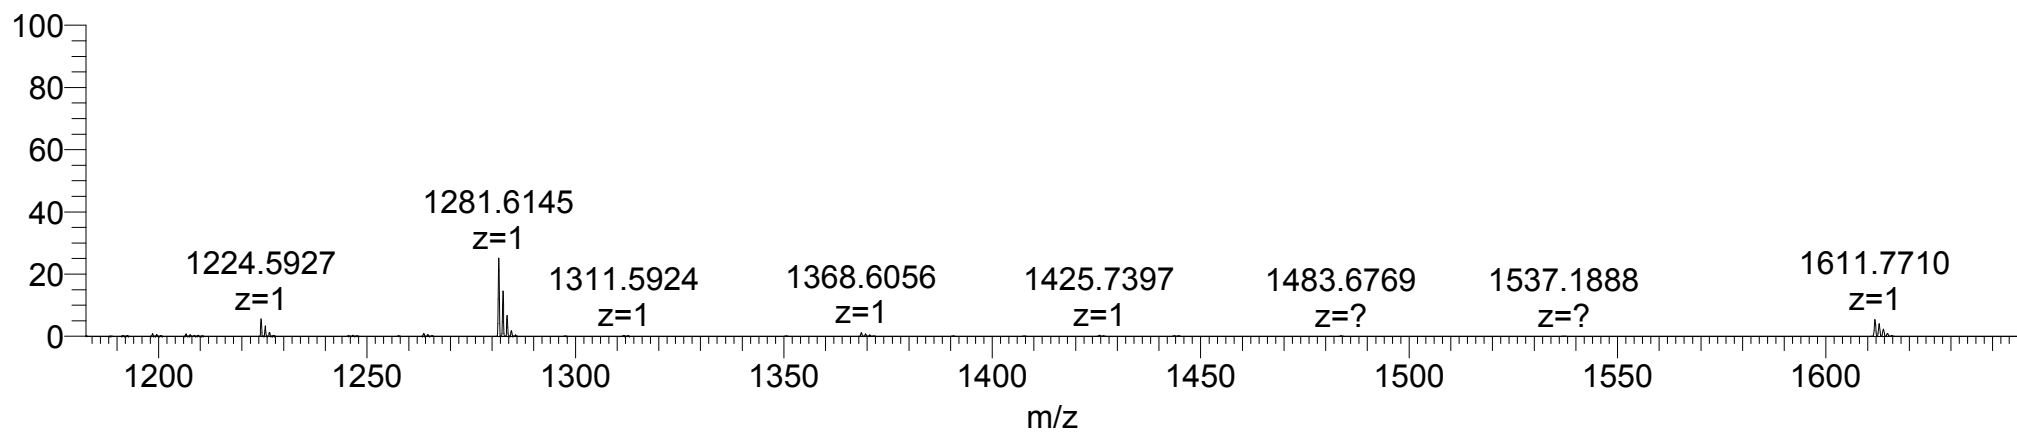



2\_2\_2012Col5a1\_Bovine\_Top5MS3 #428 RT: 5.70 AV: 1 NL: 1.90E5  
T: FTMS + p NSI d Full ms3 968.44@cid35.00 806.39@hcd30.00 [100.00-1625.00]

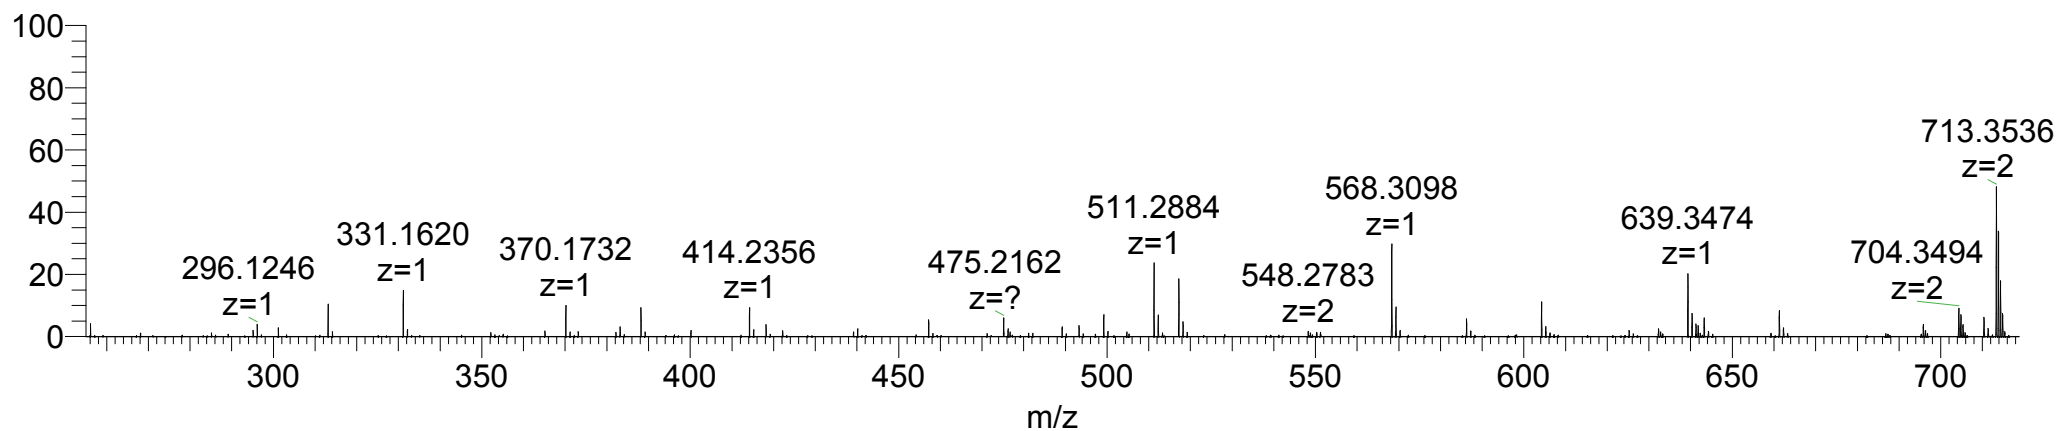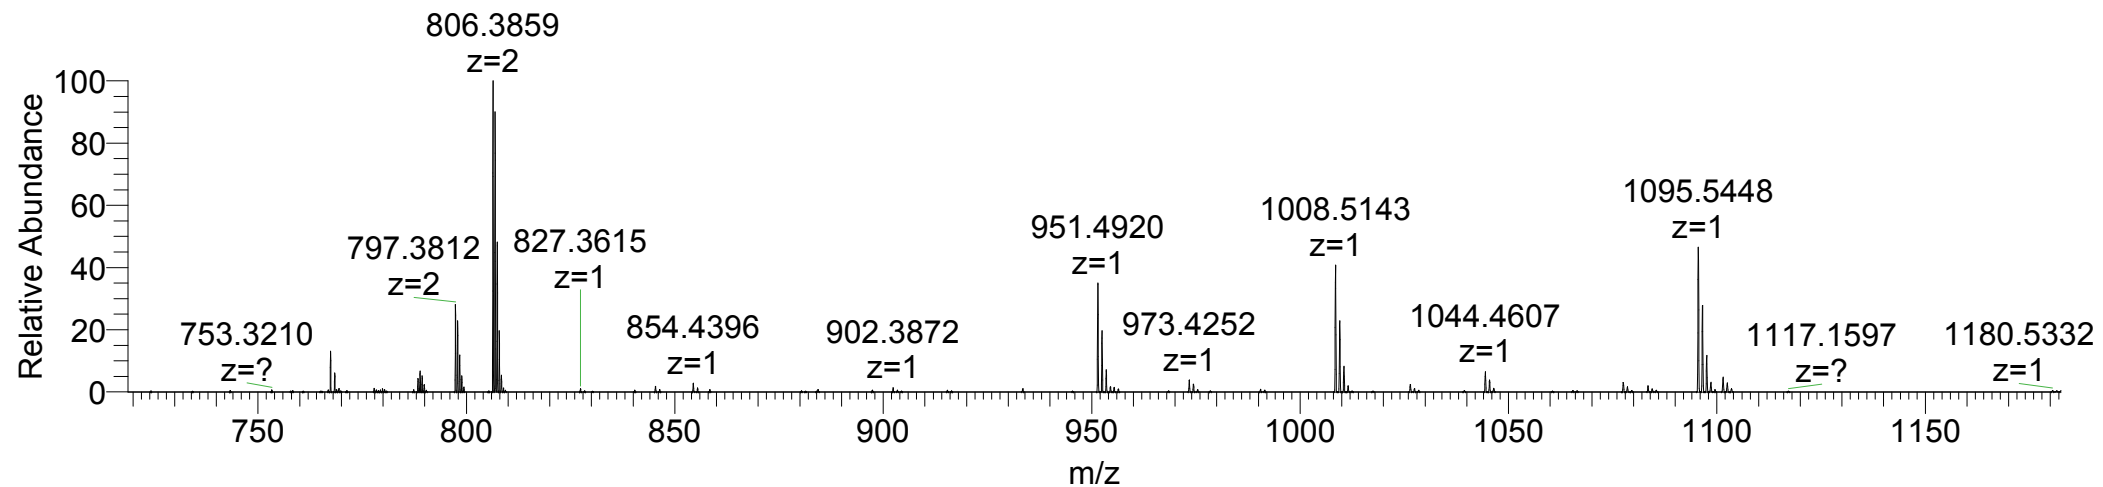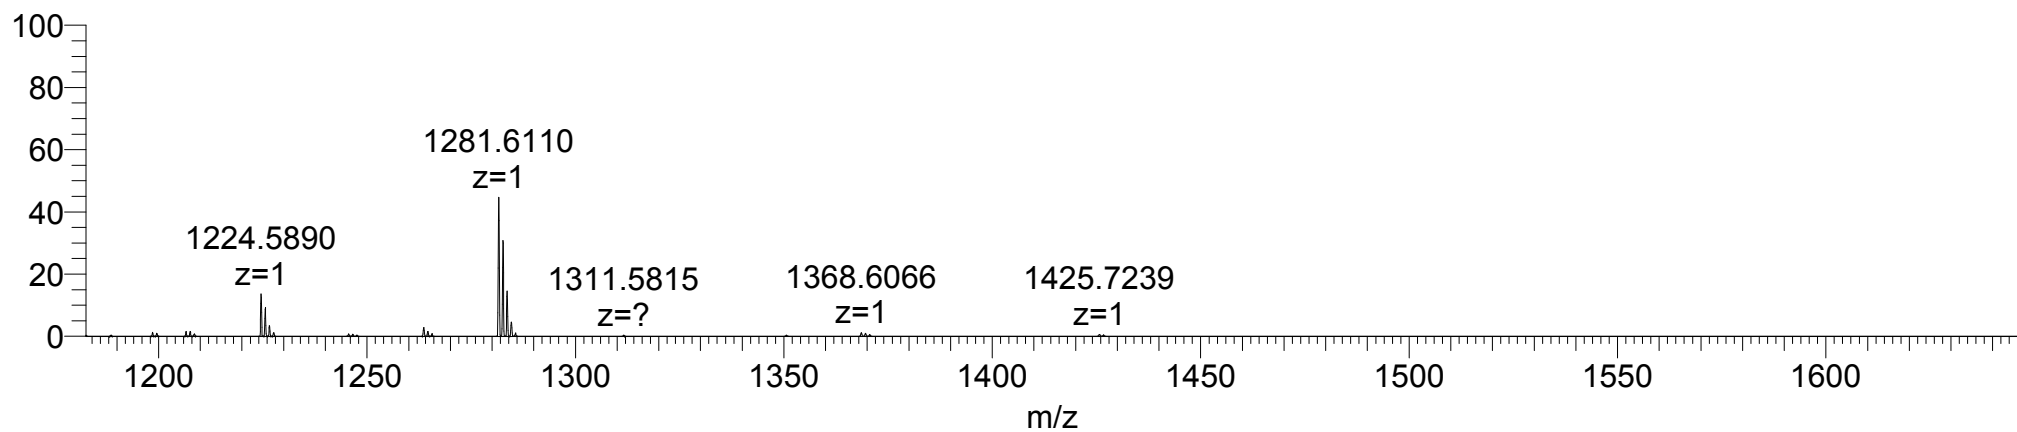

Bovine

50.

P771-OH

#756-772: SGPSGAAGPPGPKGPPG

| Ion            | charge state | Theoretical m/z (mono) | Experimental m/z (mono) | Mass error (Da) | Mass error (PPM) |
|----------------|--------------|------------------------|-------------------------|-----------------|------------------|
| [M+2H]+3OH     | 2            | 718.3442               | 718.3412                | -0.0060         | -4.2             |
| GP             | 1            | 155.0815               | 155.0816                | 0.0001          | 0.6              |
| y2+OH          | 1            | 189.0870               | 189.0872                | 0.0002          | 1.1              |
| b3/GPS         | 1            | 242.1135               | 242.1137                | 0.0002          | 0.8              |
| y3+OH          | 1            | 286.1402               | 286.1397                | -0.0005         | -1.8             |
| b4-H2O         | 1            | 311.1350               | 311.1350                | 0.0000          | 0.0              |
| y4+OH          | 1            | 343.1612               | 343.1617                | 0.0005          | 1.5              |
| b5-H2O         | 1            | 368.1565               | 368.1567                | 0.0002          | 0.5              |
| b6-H2O         | 1            | 439.1936               | 439.1935                | -0.0001         | -0.2             |
| b6/SGAAGP+OH   | 1            | 457.2041               | 457.2041                | 0.0000          | 0.0              |
| b7-H2O         | 1            | 510.2307               | 510.2303                | -0.0004         | -0.8             |
| b7             | 1            | 528.2413               | 528.2421                | 0.0008          | 1.5              |
| b8-H2O         | 1            | 567.2522               | 567.2504                | -0.0018         | -3.2             |
| b15+2OH        | 2            | 624.3044               | 624.3055                | 0.0022          | 1.8              |
| y15+3OH        | 2            | 646.3175               | 646.3185                | 0.0020          | 1.5              |
| [M+2H]-H2O+3OH | 2            | 709.3390               | 709.3398                | 0.0016          | 1.1              |
| [M+2H]+3OH     | 2            | 718.3442               | 718.3456                | 0.0028          | 2.0              |
| y8+3OH         | 1            | 754.3730               | 754.3749                | 0.0019          | 2.5              |
| y9+3OH         | 1            | 851.4258               | 851.4264                | 0.0006          | 0.7              |
| y10+3OH        | 1            | 908.4472               | 908.4486                | 0.0014          | 1.5              |
| y11+3OH        | 1            | 979.4843               | 979.4859                | 0.0016          | 1.6              |
| y12+3OH        | 1            | 1050.5214              | 1050.5225               | 0.0011          | 1.0              |
| b13+2OH        | 1            | 1093.5273              | 1093.5282               | 0.0009          | 0.8              |
| y13+3OH        | 1            | 1107.5429              | 1107.5438               | 0.0009          | 0.8              |
| b14+2OH        | 1            | 1150.5487              | 1150.5479               | -0.0008         | -0.7             |
| y14+3OH        | 1            | 1194.5764              | 1194.5764               | 0.0000          | 0.0              |

\*Unlocalized sites: P765-OH?, P767-OH?,K768-OH?

Pseudolocalized sites: P765-OH, K-768

2\_24\_2012Col5a1\_Bovine\_AspNGluC\_3 #3016 RT: 32.67 AV: 1 NL: 1.45E4

T: FTMS + p NSI d Full ms2 718.34@hcd30.00 [100.00-1450.00]

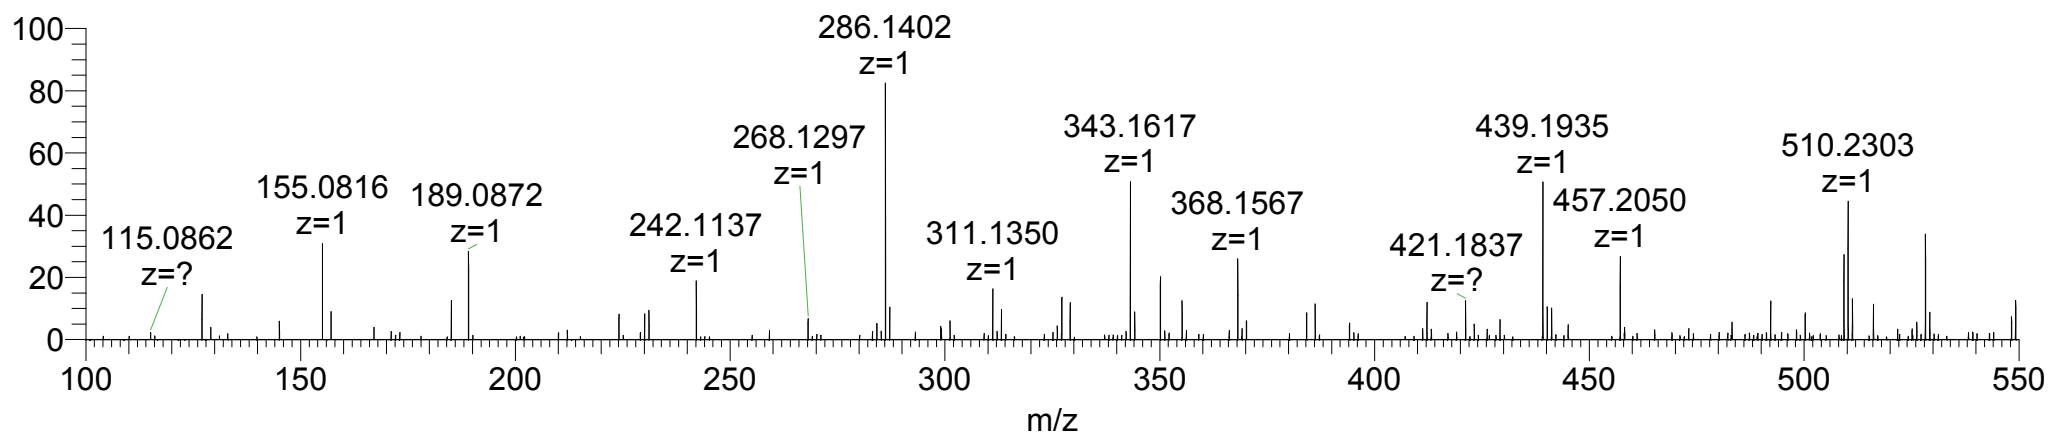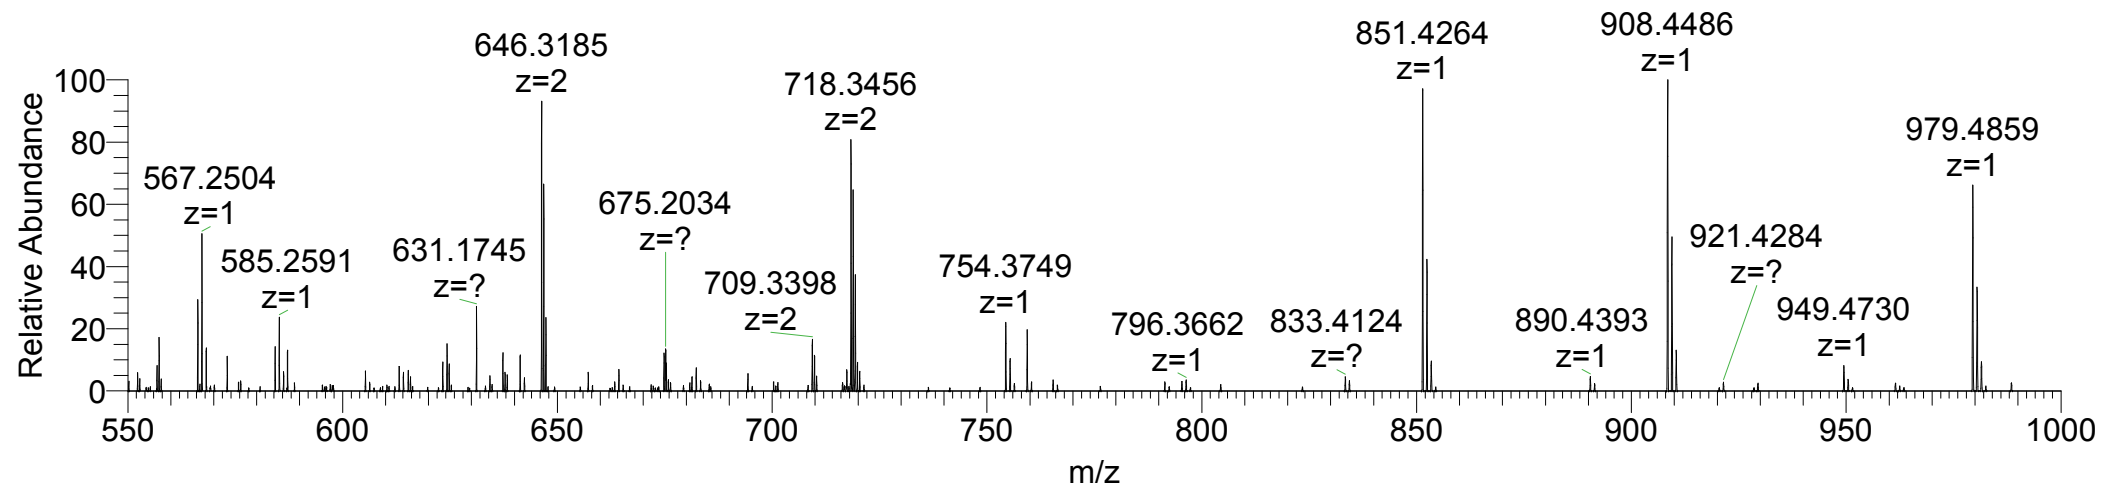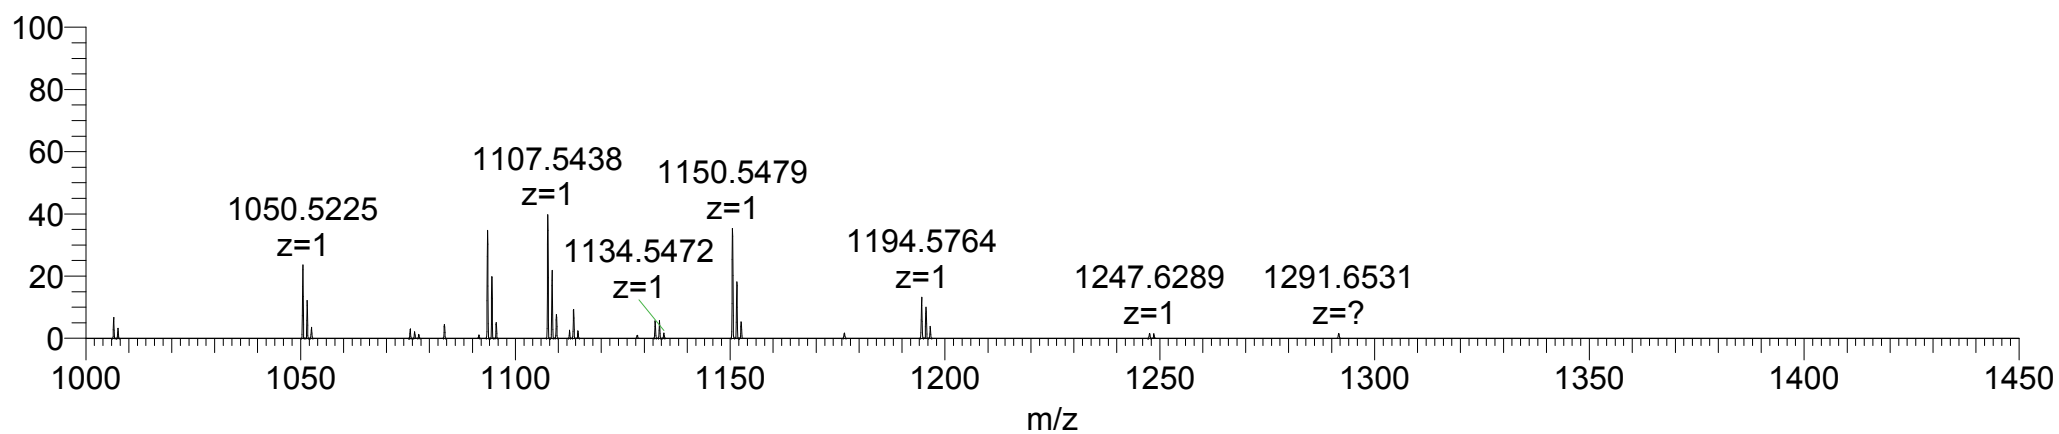

Bovine

51.

K777-OH.Gal.Glc, P780-OH, P786-OH

#773-787: DDGPKGSPGGPVGFPG

| Ion                | charge state | Theoretical m/z (mono) | Experimental m/z (mono) | Mass error (Da) | Mass error (PPM) |
|--------------------|--------------|------------------------|-------------------------|-----------------|------------------|
| [M+2H]+3OH+Gal.Glc | 2            | 878.3758               | 878.3711                | -0.0094         | -5.4             |
| F                  | 1            | 120.0808               | 120.0805                | -0.0003         | -2.5             |
| y2                 | 1            | 189.0870               | 189.0866                | -0.0004         | -2.1             |
| PV                 | 1            | 242.1499               | 242.1494                | -0.0005         | -2.1             |
| PKG+OH/GPK+OH      | 1            | 299.1714               | 299.1708                | -0.0006         | -2.0             |
| PGPK-28+2OH        | 1            | 339.2027               | 339.2022                | -0.0005         | -1.5             |
| PGPVG+OH           | 1            | 424.2191               | 424.2189                | -0.0002         | -0.5             |
| b10+2OH            | 2            | 470.7040               | 470.7021                | -0.0038         | -4.0             |
| b7-H2O+OH          | 1            | 655.2682               | 655.2661                | -0.0021         | -3.2             |
| b7+OH              | 1            | 673.2788               | 673.2769                | -0.0019         | -2.8             |
| b9+2OH             | 1            | 843.3479               | 843.3466                | -0.0013         | -1.5             |
| b12+2OH            | 1            | 1096.4905              | 1096.4884               | -0.0021         | -1.9             |

2\_24\_2012Col5a1\_Bovine\_AspNGluC\_CE40 #2028 RT: 18.14 AV: 1 NL: 5.94E5

T: FTMS + p NSI d Full ms2 878.37@hcd40.00 [100.00-1770.00]

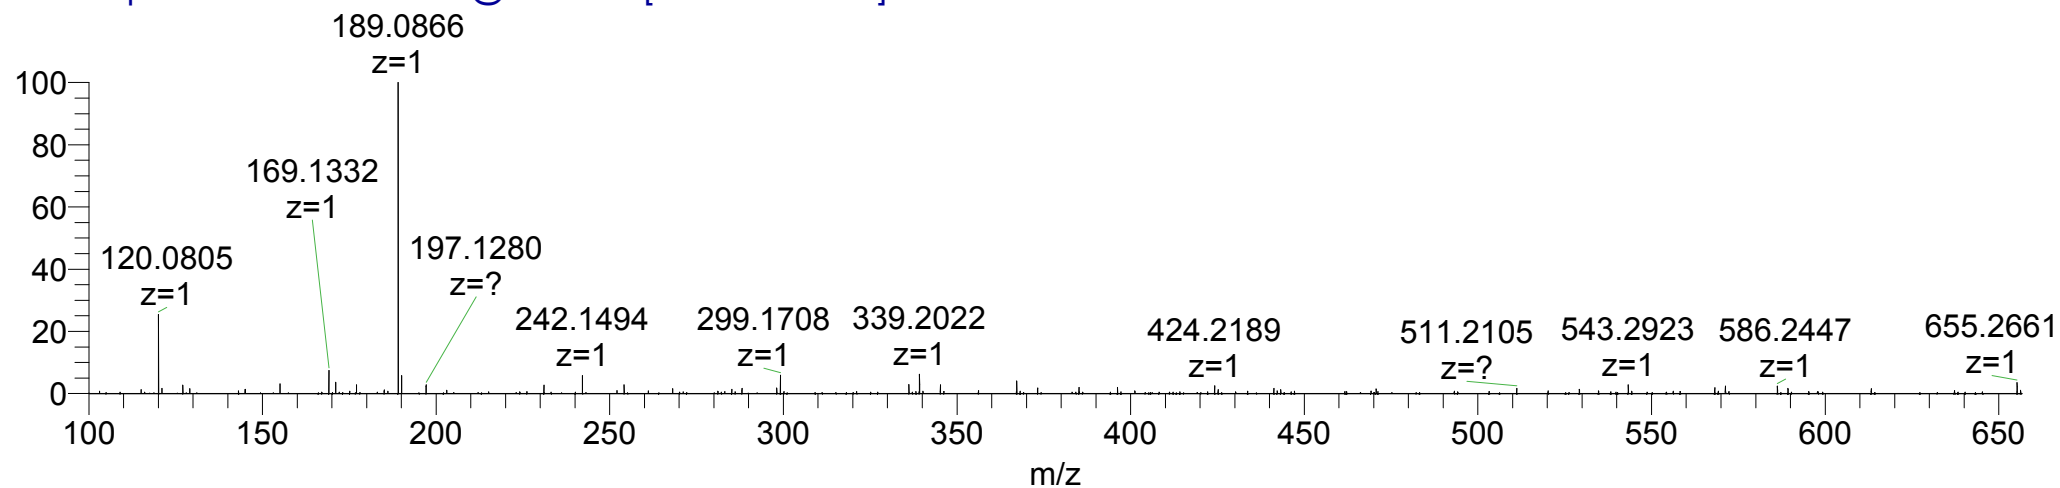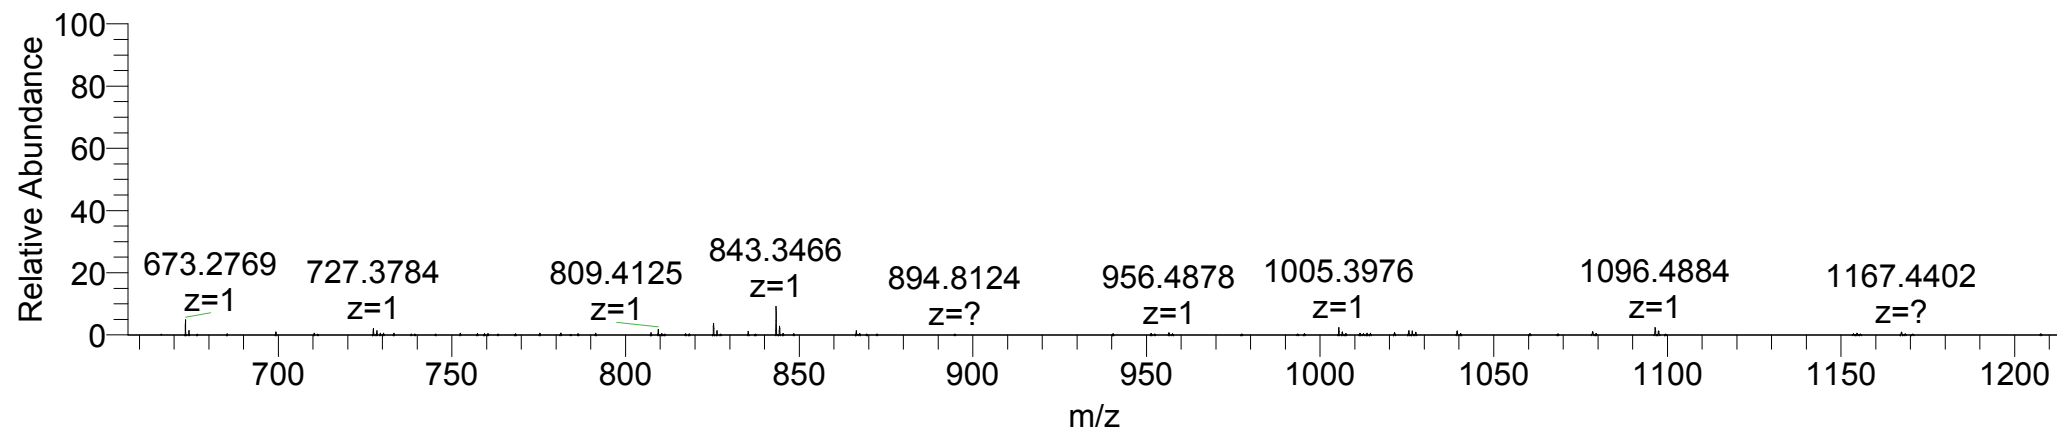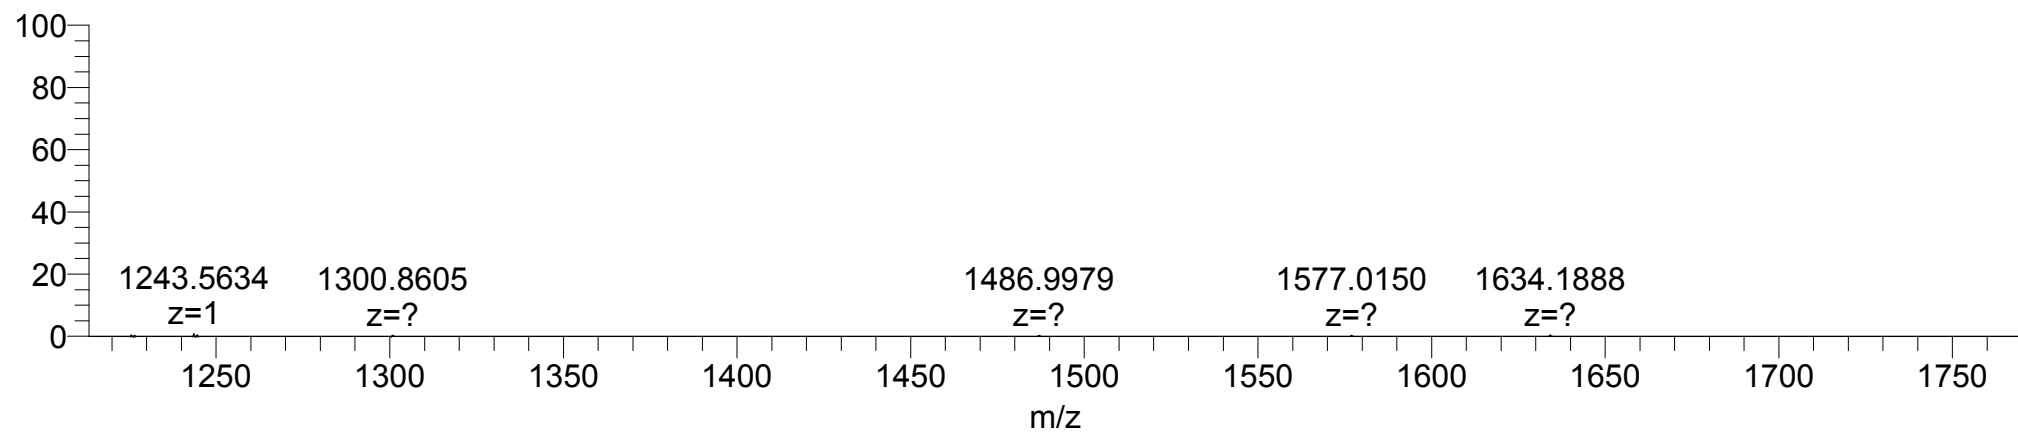

Bovine

52.

P789-OH, P792-OH, P795-OH

#788-800: DPGPPGEPGPAGQ

| Ion                             | charge state | Theoretical m/z (mono) | Experimental m/z (mono) | Mass error (Da) | Mass error (PPM) |
|---------------------------------|--------------|------------------------|-------------------------|-----------------|------------------|
| [M+2H]+3OH                      | 2            | 612.2624               | 612.2607                | -0.0034         | -2.8             |
| y1-NH3                          | 1            | 130.0499               | 130.0498                | -0.0001         | -0.8             |
| y1                              | 1            | 147.0764               | 147.0763                | -0.0001         | -0.7             |
| GE/y2-NH3                       | 1            | 187.0713               | 187.0713                | 0.0000          | 0.0              |
| y2                              | 1            | 204.0979               | 204.0977                | -0.0002         | -1.0             |
| PGPA+OH                         | 1            | 339.1663               | 339.1660                | -0.0003         | -0.9             |
| y4                              | 1            | 372.1878               | 372.1878                | 0.0000          | 0.0              |
| b4+OH                           | 1            | 383.1567               | 383.1562                | -0.0005         | -1.3             |
| EPGP+OH                         | 1            | 397.1718               | 397.1706                | -0.0012         | -3.0             |
| GEPGP+OH                        | 1            | 454.1932               | 454.1936                | 0.0004          | 0.9              |
| y10-H2O+2OH                     | 2            | 460.7091               | 460.7064                | -0.0054         | -5.9             |
| y6+OH                           | 1            | 542.2569               | 542.2569                | 0.0000          | 0.0              |
| GPPGEP+2OH                      | 1            | 567.2409               | 567.2408                | -0.0001         | -0.2             |
| b7+2OH                          | 1            | 682.2679               | 682.2675                | -0.0004         | -0.6             |
| GPPGEPGPA+2OH/<br>PPGEPGPAG+2OH | 1            | 792.3523               | 792.3513                | -0.0010         | -1.3             |
| b9-H2O+3OH                      | 1            | 834.3264               | 834.3256                | -0.0008         | -1.0             |
| b9+3OH                          | 1            | 852.3370               | 852.3361                | -0.0009         | -1.1             |
| b11+3OH                         | 1            | 1020.4269              | 1020.4275               | 0.0006          | 0.6              |
| b12+3OH                         | 1            | 1077.4483              | 1077.4484               | 0.0001          | 0.1              |

2\_24\_2012Col5a1\_Bovine\_AspNGluC\_2 #317 RT: 4.47 AV: 1 NL: 4.15E5

T: FTMS + p NSI d Full ms2 612.26@hcd30.00 [100.00-1235.00]

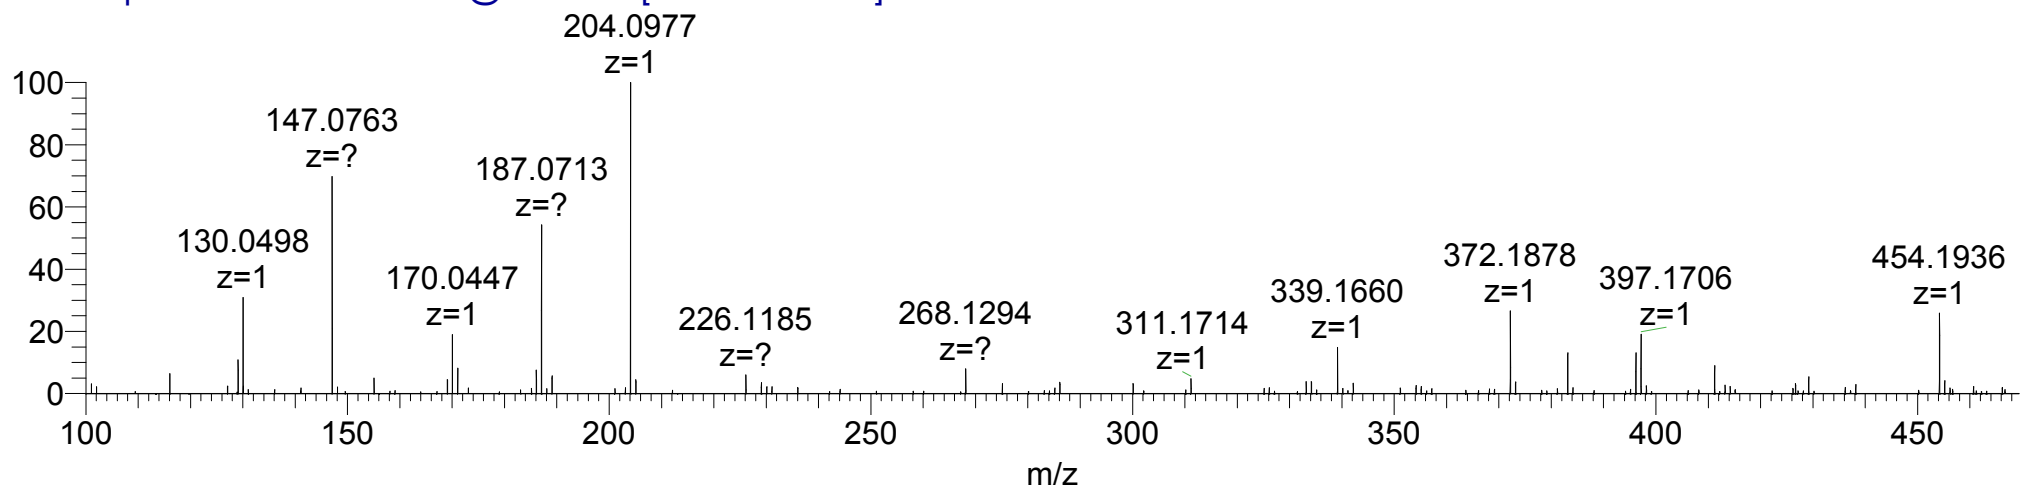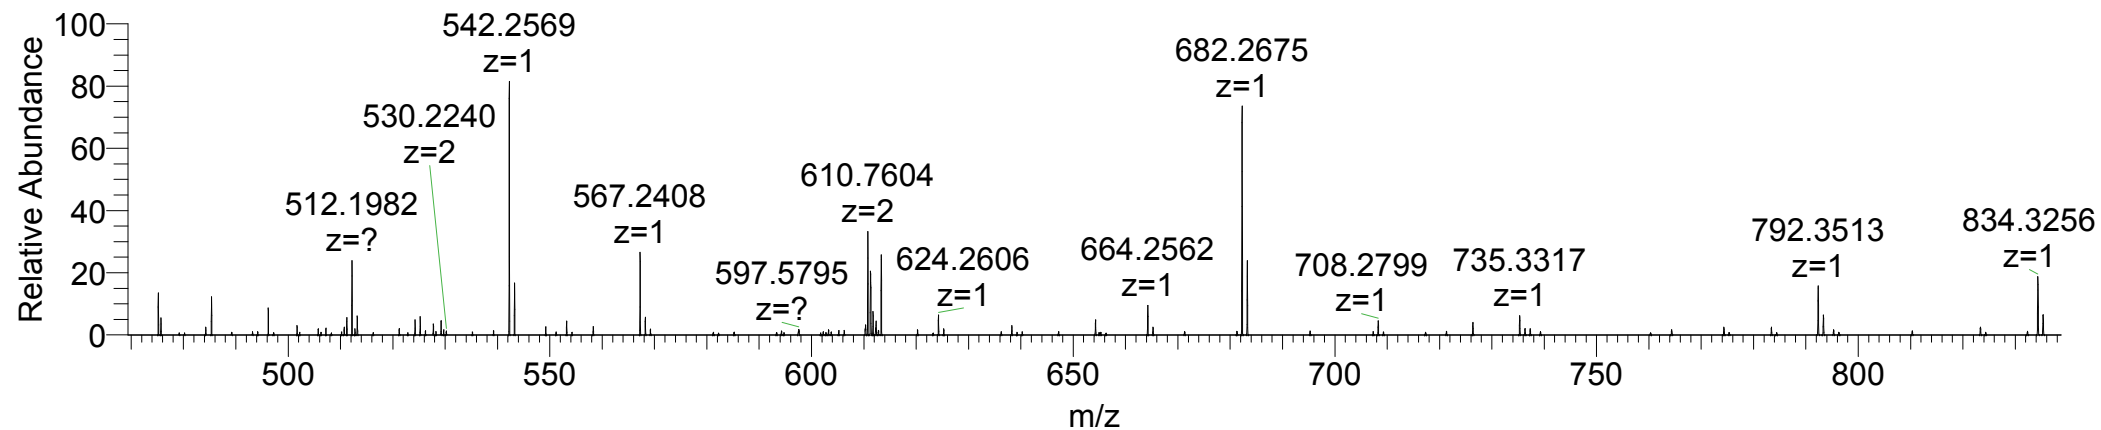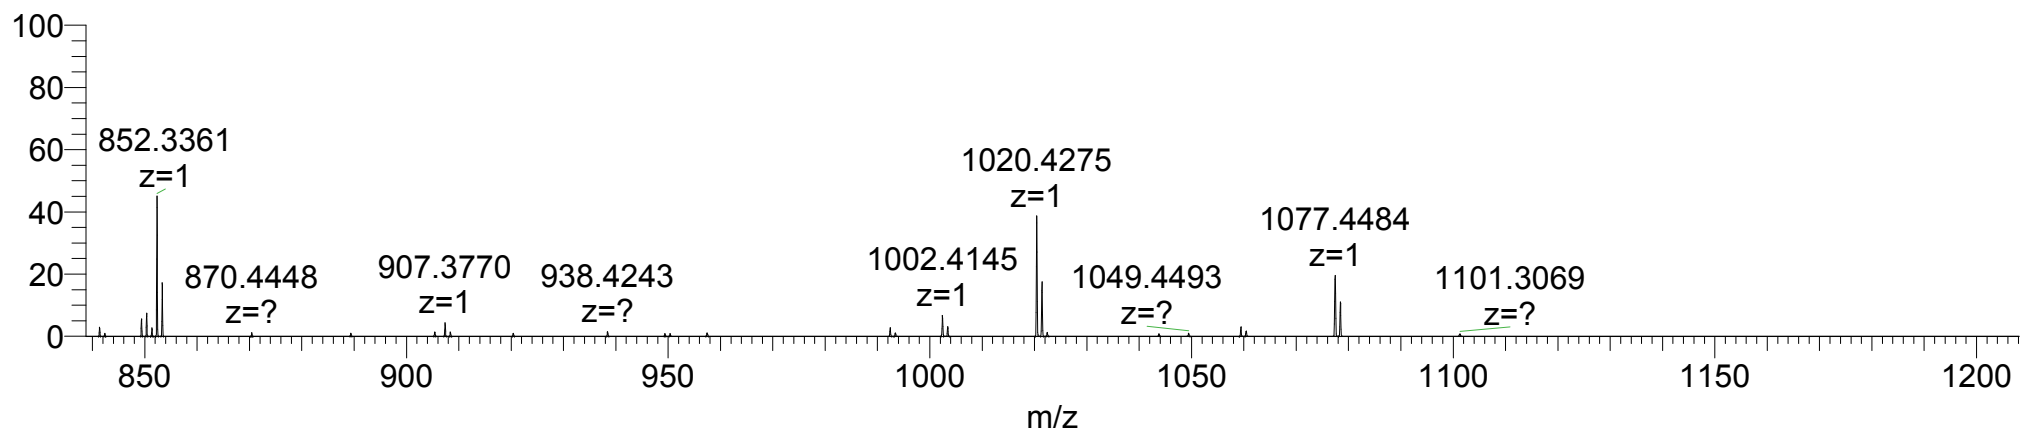

Bovine

53.

P813-OH, P819-OH, P825-OH

#808-833: GDDGEPGQQTGSPGPTGEPGPSGPPGK

| Ion                     | charge state | Theoretical m/z (mono) | Experimental m/z (mono) | Mass error (Da) | Mass error (PPM) |
|-------------------------|--------------|------------------------|-------------------------|-----------------|------------------|
| [M+3H]+4OH              | 3            | 799.3422               | 799.3444                | 0.0066          | 2.8              |
| y9+2OH                  | 2            | 413.2087               | 413.2104                | 0.0034          | 4.1              |
| b5                      | 1            | 474.1467               | 474.1483                | 0.0016          | 3.4              |
| y13+2OH                 | 2            | 605.2909               | 605.2925                | 0.0032          | 2.6              |
| y7+OH                   | 1            | 655.3410               | 655.3450                | 0.0040          | 6.1              |
| y15+3OH                 | 2            | 690.3255               | 690.3282                | 0.0054          | 3.9              |
| y17+3OH                 | 2            | 762.3523               | 762.3560                | 0.0074          | 4.9              |
| b8+OH                   | 1            | 772.2744               | 772.2771                | 0.0027          | 3.5              |
| y18+3OH                 | 2            | 812.8761               | 812.8793                | 0.0064          | 3.9              |
| y9+2OH                  | 1            | 825.4101               | 825.4131                | 0.0030          | 3.6              |
| b9+OH/<br>DDGEPGQQTG+OH | 1            | 873.3221               | 873.3254                | 0.0033          | 3.8              |
| y21-H2O+4OH             | 2            | 952.9347               | 952.9398                | 0.0102          | 5.4              |
| y21+4OH                 | 2            | 961.9400               | 961.9431                | 0.0062          | 3.2              |
| b11+OH                  | 1            | 1017.3756              | 1017.3779               | 0.0023          | 2.3              |
| b17+2OH                 | 1            | 1571.6092              | 1571.6171               | 0.0079          | 5.0              |

\*Unlocalized sites: P831-OH? , K833-OH?

Pseudolocalized sites: P831-OH



2\_2\_2012Col5a1\_Bovine\_us2Top3 #764 RT: 11.72 AV: 1 NL: 3.72E5

T: FTMS + p NSI d Full ms2 799.68@cid35.00 [210.00-2000.00]

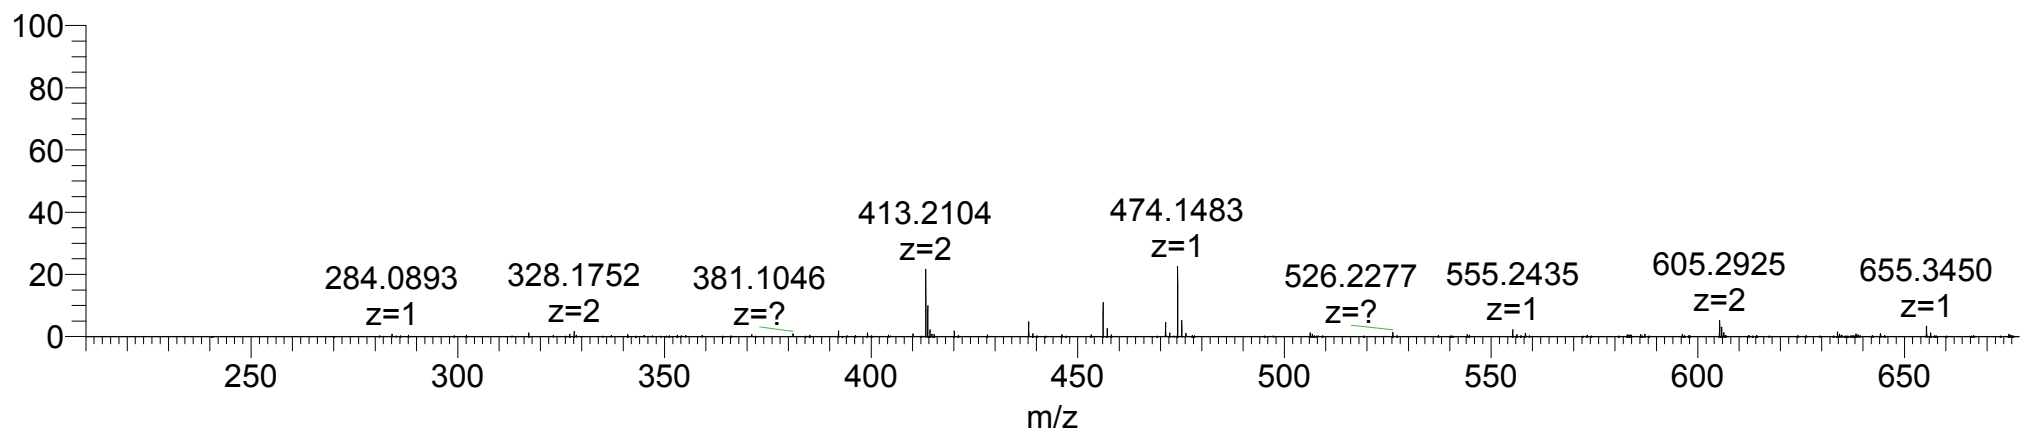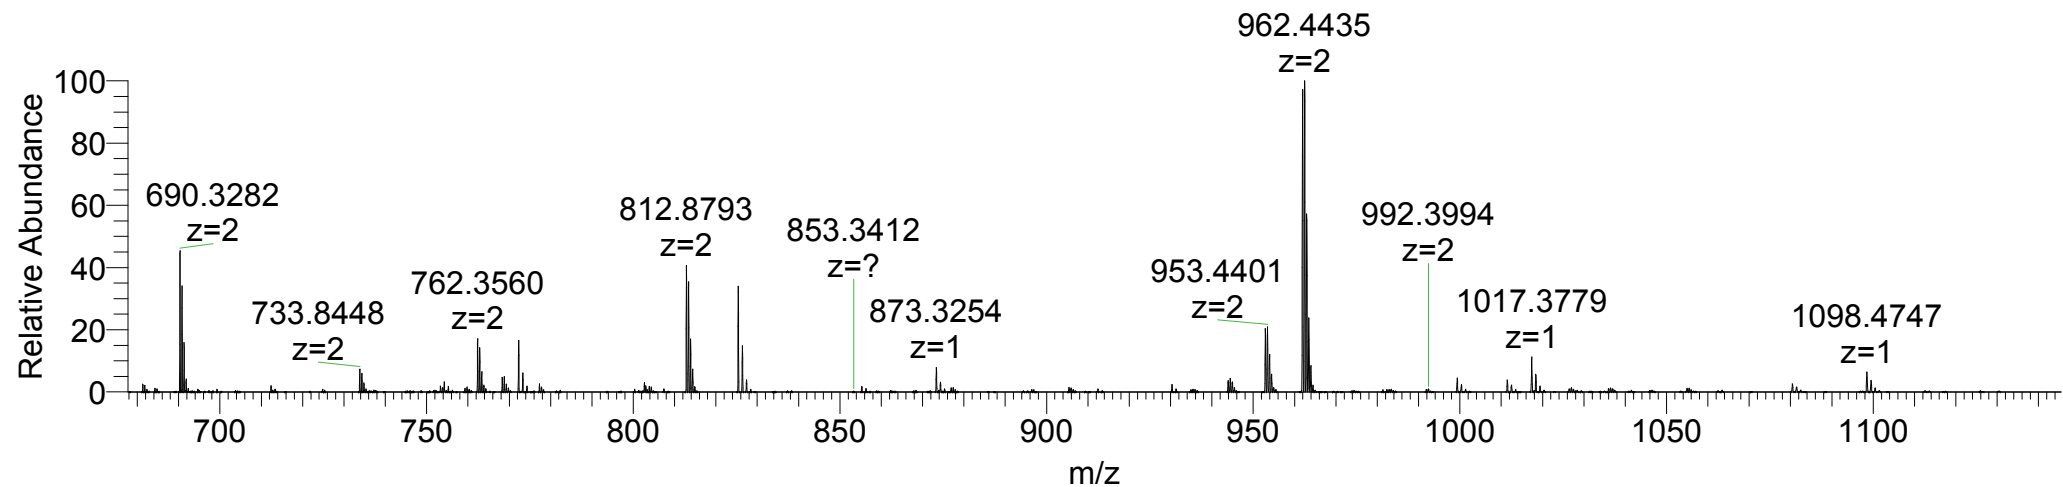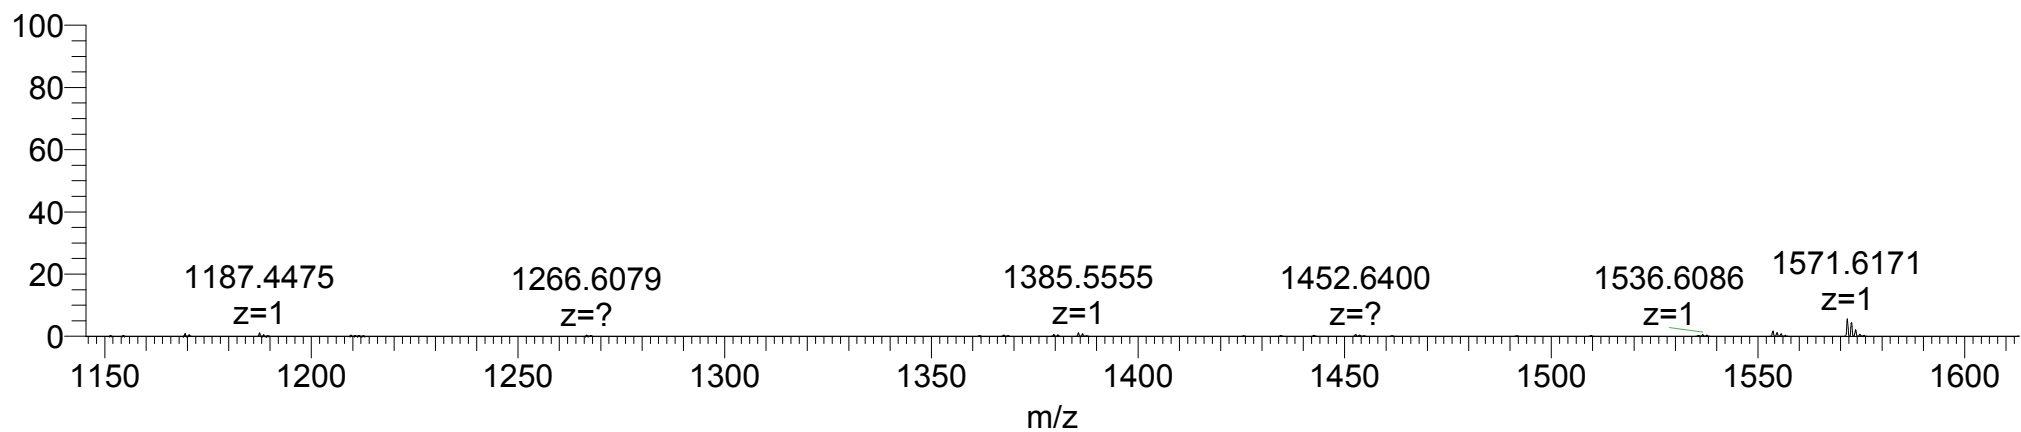

Bovine

54.

P825-OH, P831-OH, P837-OH

#825-843: PGPSGPPGKRGPPGPAGPE

| Ion        | charge state | Theoretical m/z (mono) | Experimental m/z (mono) | Mass error (Da) | Mass error (PPM) |
|------------|--------------|------------------------|-------------------------|-----------------|------------------|
| [M+2H]+3OH | 2            | 878.9343               | 878.9348                | 0.0010          | 0.6              |
| b2/GP+OH   | 1            | 171.0764               | 171.0763                | -0.0001         | -0.6             |
| PSG-H2O    | 1            | 224.1030               | 224.1030                | 0.0000          | 0.0              |
| y2         | 1            | 245.1132               | 245.1132                | 0.0000          | 0.0              |
| y3         | 1            | 302.1347               | 302.1346                | -0.0001         | -0.3             |
| b4/y4-H2O  | 1            | 355.1612               | 355.1614                | 0.0002          | 0.6              |
| b5-H2O+OH  | 1            | 394.1721               | 394.1721                | 0.0000          | 0.0              |
| b5+OH      | 1            | 412.1827               | 412.1828                | 0.0001          | 0.2              |
| y5         | 1            | 470.2245               | 470.2232                | -0.0013         | -2.8             |
| y7+OH      | 1            | 640.2937               | 640.2920                | -0.0017         | -2.7             |
| y14+2OH    | 2            | 673.3466               | 673.3455                | -0.0022         | -1.6             |
| y15+2OH    | 2            | 701.8573               | 701.8574                | 0.0002          | 0.1              |
| a16+3OH    | 2            | 714.3731               | 714.3731                | 0.0000          | 0.0              |
| b16+3OH    | 2            | 728.3706               | 728.3696                | -0.0020         | -1.4             |
| y8+OH      | 1            | 737.3464               | 737.3455                | -0.0009         | -1.2             |
| b17+3OH    | 2            | 756.8813               | 756.8817                | 0.0008          | 0.5              |
| y17+2OH    | 2            | 793.8997               | 793.8984                | -0.0026         | -1.6             |
| y18+2OH    | 2            | 822.4104               | 822.4098                | -0.0012         | -0.7             |
| [M+2H]+3OH | 2            | 878.9343               | 878.9338                | -0.0010         | -0.6             |
| y10+OH     | 1            | 950.4690               | 950.4695                | 0.0005          | 0.5              |
| b11+2OH    | 1            | 1020.5221              | 1020.5239               | 0.0018          | 1.8              |
| y12+OH     | 1            | 1135.5854              | 1135.5834               | -0.0020         | -1.8             |
| y13+2OH    | 1            | 1248.6331              | 1248.6333               | 0.0002          | 0.2              |
| b14+3OH    | 1            | 1287.6440              | 1287.6416               | -0.0024         | -1.9             |
| y14+2OH    | 1            | 1345.6859              | 1345.6871               | 0.0012          | 0.9              |
| y15+2OH    | 1            | 1402.7074              | 1402.7073               | -0.0001         | -0.1             |
| y16+2OH    | 1            | 1489.7394              | 1489.7375               | -0.0019         | -1.3             |

4\_5\_2012Col5a1\_GluC\_HCD2 #1454 RT: 11.36 AV: 1 NL: 5.20E4

T: FTMS + p NSI d Full ms2 878.93@hcd35.00 [115.00-1770.00]

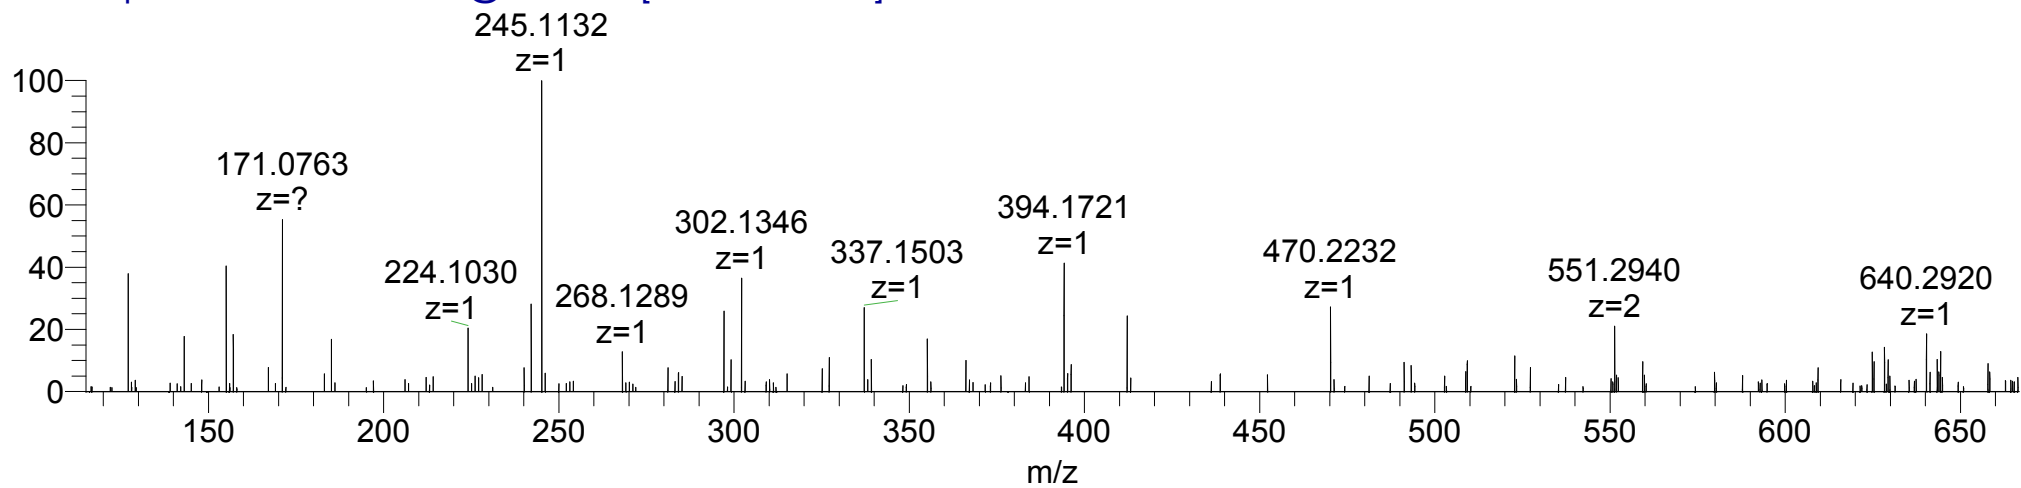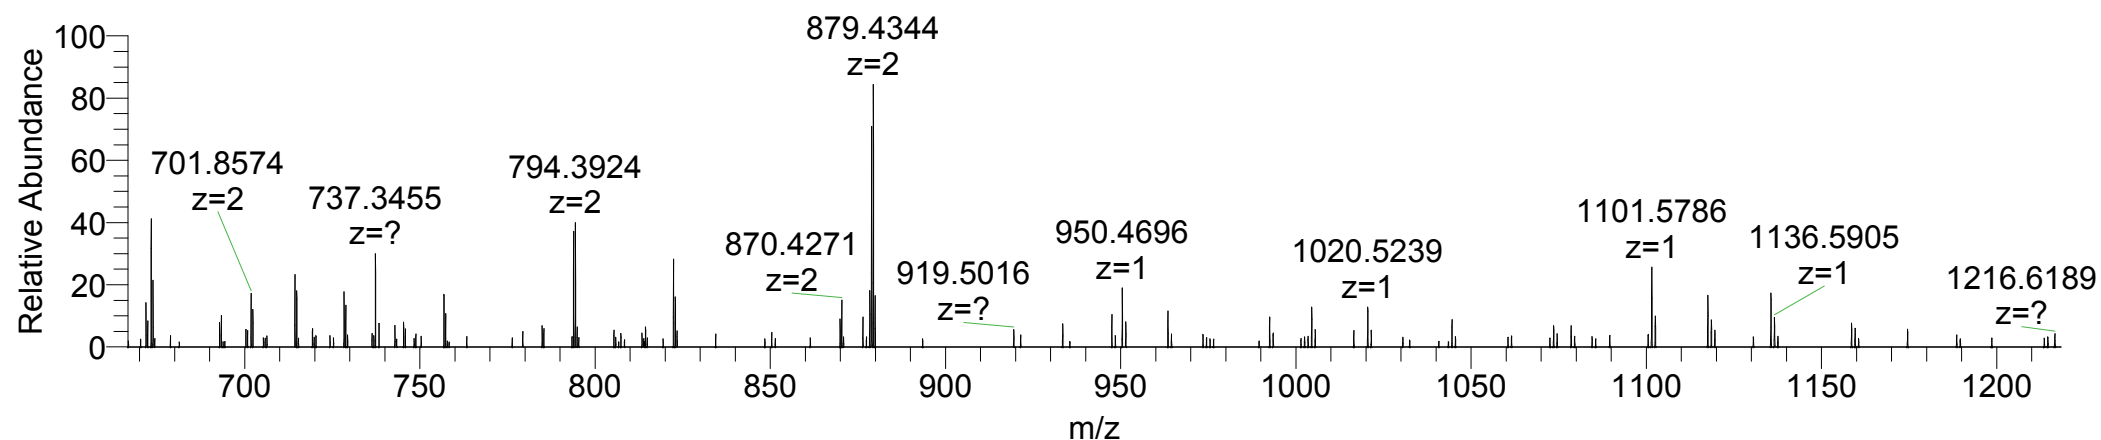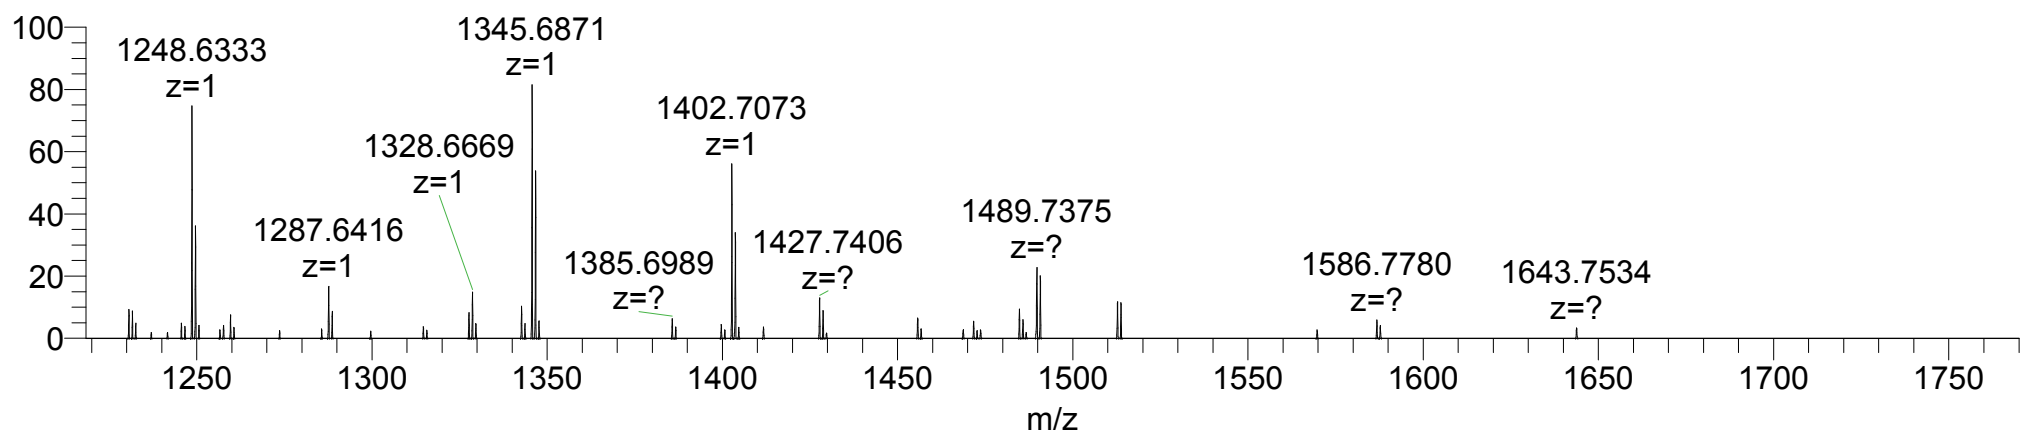

Bovine

55.

K849-OH.Gal.Glc, K852-OH.Gal.Glc, P861-OH

#846-863: QGEKGAKEAGLEGPPGK

| Ion                | charge state | Theoretical m/z (mono) | Experimental m/z (mono) | Mass error (Da) | Mass error (PPM) |
|--------------------|--------------|------------------------|-------------------------|-----------------|------------------|
| [M+4H]+3OH+Gal.Glc | 4            | 602.2749               | 602.2726                | -0.0092         | -3.8             |
| y2                 | 1            | 204.1343               | 204.1338                | -0.0005         | -2.5             |
| y3+OH              | 1            | 317.1819               | 317.1812                | -0.0007         | -2.2             |
| y4+OH              | 1            | 414.2347               | 414.2339                | -0.0008         | -1.9             |
| y5+OH              | 1            | 471.2562               | 471.2550                | -0.0012         | -2.6             |
| y6+OH              | 1            | 600.2988               | 600.2979                | -0.0009         | -1.5             |
| y7+OH              | 1            | 713.3828               | 713.3791                | -0.0037         | -5.2             |
| y8+OH              | 1            | 770.4043               | 770.4021                | -0.0022         | -2.9             |
| y9+OH              | 1            | 841.4414               | 841.4376                | -0.0038         | -4.5             |
| [M+2H]-H2O+3OH     | 2            | 870.4316               | 870.4302                | -0.0028         | -1.6             |
| [M+2H]+3OH         | 2            | 879.4369               | 879.4335                | -0.0068         | -3.9             |
| y10+OH             | 1            | 970.4840               | 970.4786                | -0.0054         | -5.6             |
| y11+OH             | 1            | 1027.5055              | 1027.5010               | -0.0045         | -4.4             |
| b12-NH3+2OH        | 1            | 1141.5484              | 1141.5497               | 0.0013          | 1.1              |
| y14+2OH            | 1            | 1299.6539              | 1299.6495               | -0.0044         | -3.4             |

2\_25\_2012Col5a1\_Bovine\_Trypsin\_nontraping\_CE35 #2547 RT: 29.35 AV: 1 NL: 2.29E6

T: FTMS + p NSI d Full ms2 602.52@hcd35.00 [100.00-2000.00]

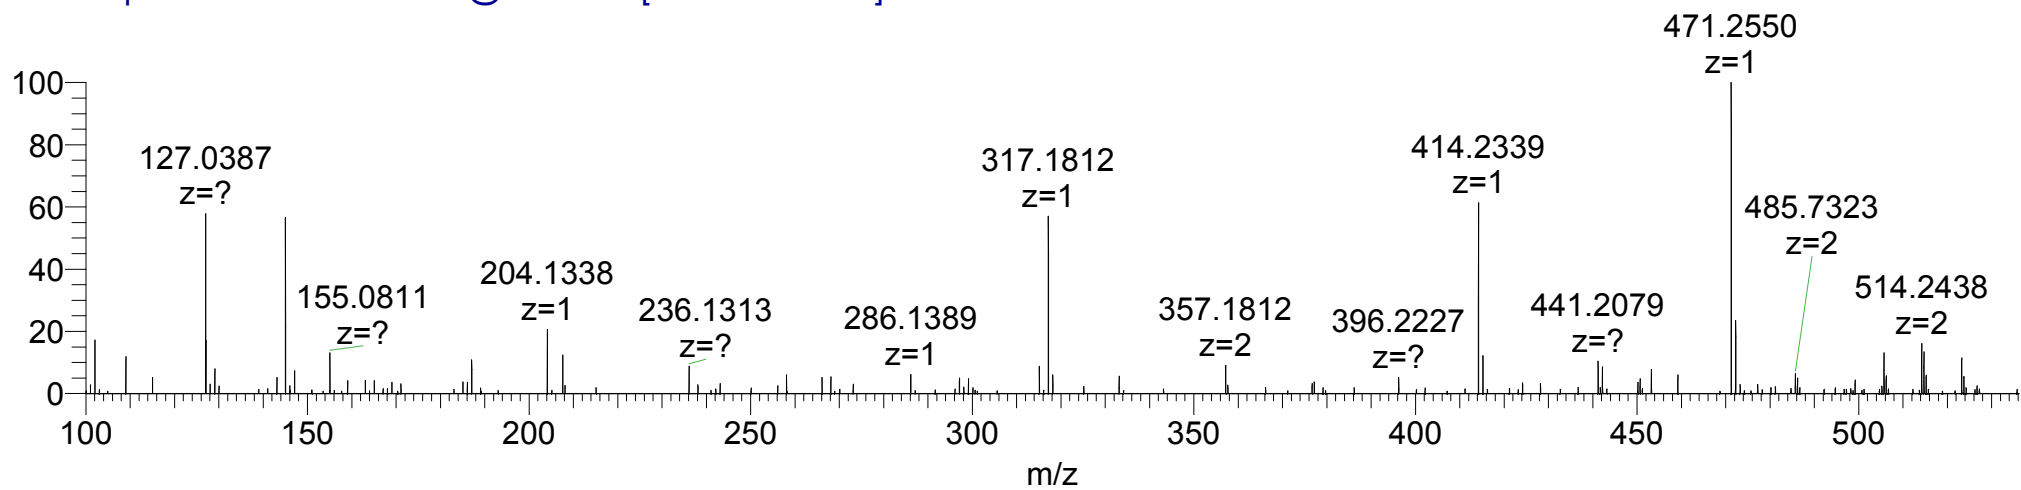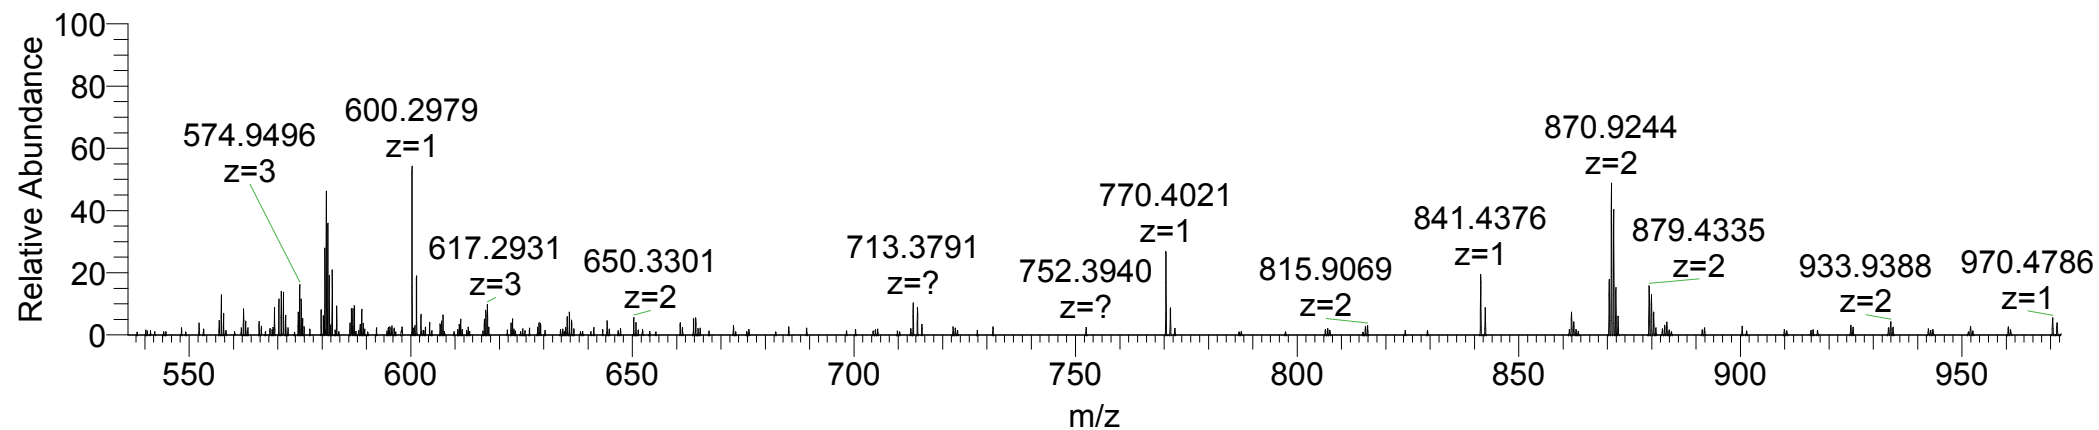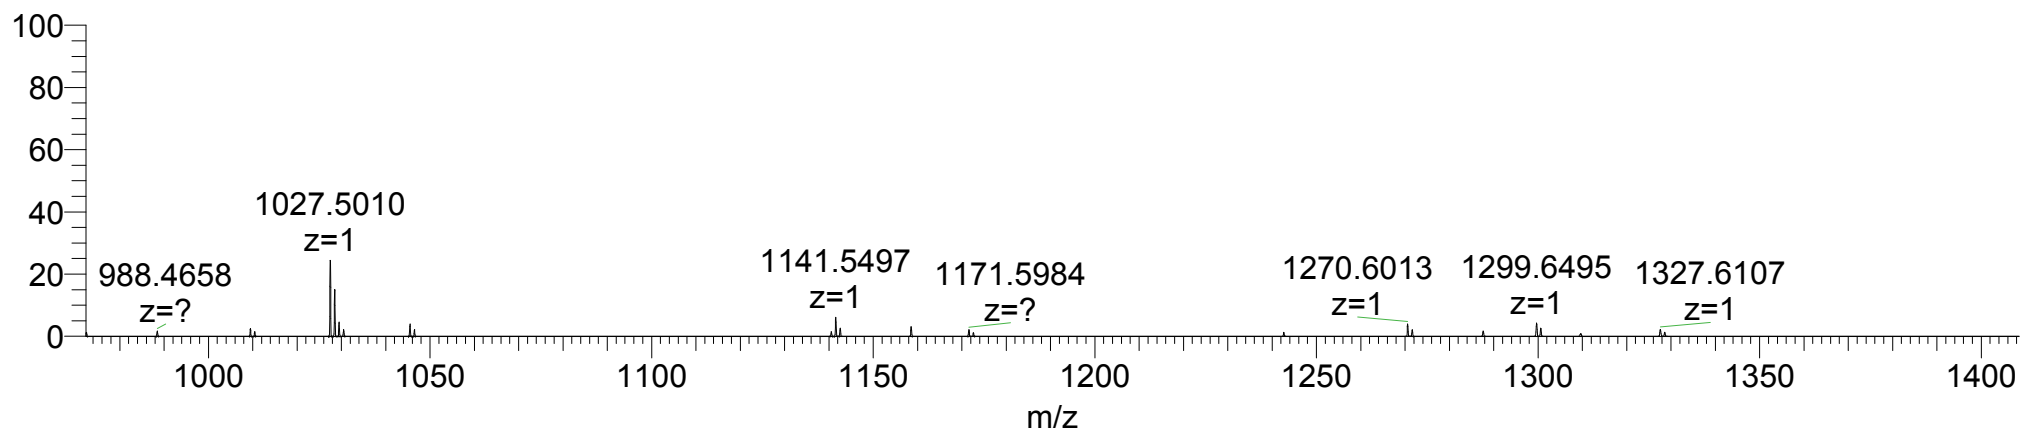

Bovine

56.

P873-OH, P876-OH

#864-882: TGPIGPQGAPGKPGPDGLR

| Ion        | charge state | Theoretical m/z (mono) | Experimental m/z (mono) | Mass error (Da) | Mass error (PPM) |
|------------|--------------|------------------------|-------------------------|-----------------|------------------|
| [M+3H]+2OH | 3            | 601.9831               | 601.9832                | 0.0003          | 0.2              |
| K          | 1            | 129.1022               | 129.1026                | 0.0004          | 3.1              |
| PI-28      | 1            | 183.1492               | 183.1497                | 0.0005          | 2.7              |
| PI         | 1            | 211.1441               | 211.1448                | 0.0007          | 3.3              |
| b3         | 1            | 256.1292               | 256.1298                | 0.0006          | 2.4              |
| KPG+OH     | 1            | 299.1714               | 299.1723                | 0.0009          | 3.0              |
| y3         | 1            | 345.2245               | 345.2253                | 0.0008          | 2.3              |
| b5-H2O     | 1            | 408.2241               | 408.2254                | 0.0013          | 3.2              |
| y14+2OH    | 3            | 460.2406               | 460.2423                | 0.0051          | 3.7              |
| y10+2OH    | 2            | 513.2724               | 513.2738                | 0.0028          | 2.7              |
| y17+2OH    | 3            | 549.2934               | 549.2945                | 0.0033          | 2.0              |
| y5         | 1            | 557.3042               | 557.3052                | 0.0010          | 1.8              |
| y12+2OH    | 2            | 577.3016               | 577.3030                | 0.0028          | 2.4              |
| y6         | 1            | 614.3257               | 614.3266                | 0.0009          | 1.5              |
| y14+2OH    | 2            | 689.8573               | 689.8593                | 0.0040          | 2.9              |
| y15+2OH    | 2            | 718.3680               | 718.3694                | 0.0028          | 2.0              |
| y7+OH      | 1            | 727.3733               | 727.3748                | 0.0015          | 2.1              |
| y16+2OH    | 2            | 774.9101               | 774.9117                | 0.0032          | 2.1              |
| y17+2OH    | 2            | 823.4365               | 823.4385                | 0.0040          | 2.4              |
| y9+OH      | 1            | 912.4898               | 912.4949                | 0.0051          | 5.6              |
| y10+2OH    | 1            | 1025.5374              | 1025.5393               | 0.0019          | 1.9              |

2\_2\_2012Col5a1\_Bovine\_HCD1\_CE30 #1734 RT: 15.06 AV: 1 NL: 2.73E7

T: FTMS + p NSI d Full ms2 601.98@hcd30.00 [100.00-1820.00]

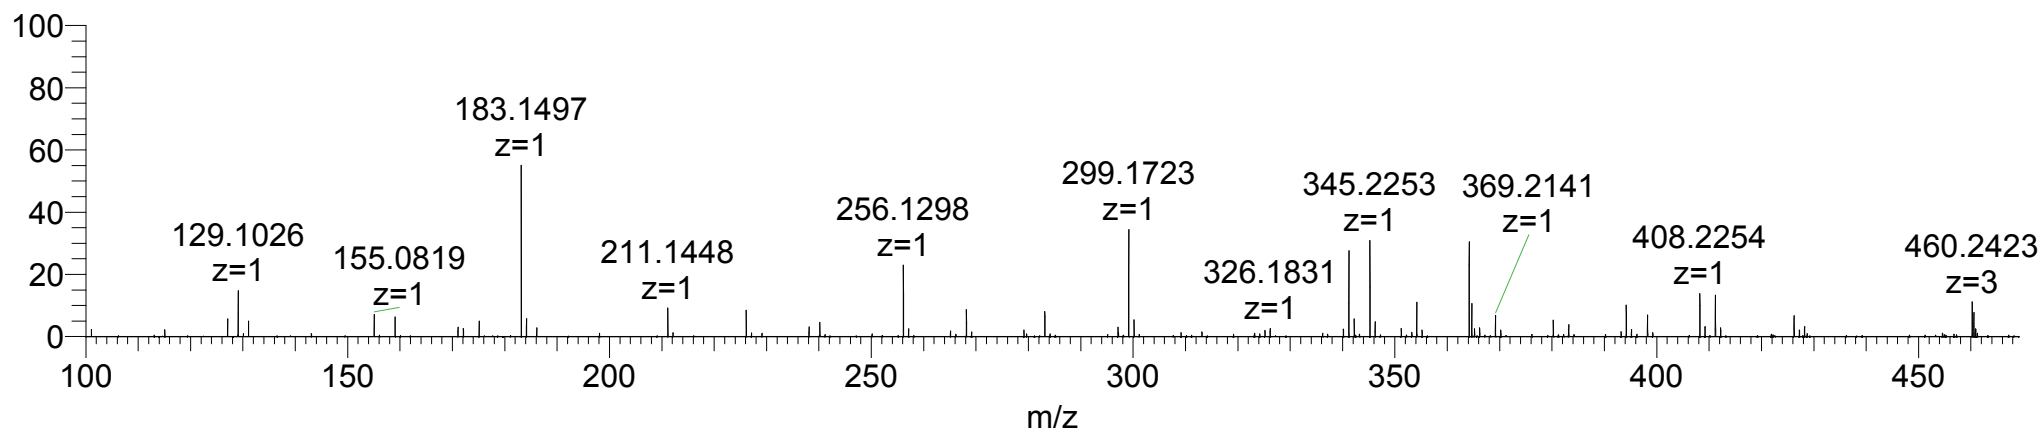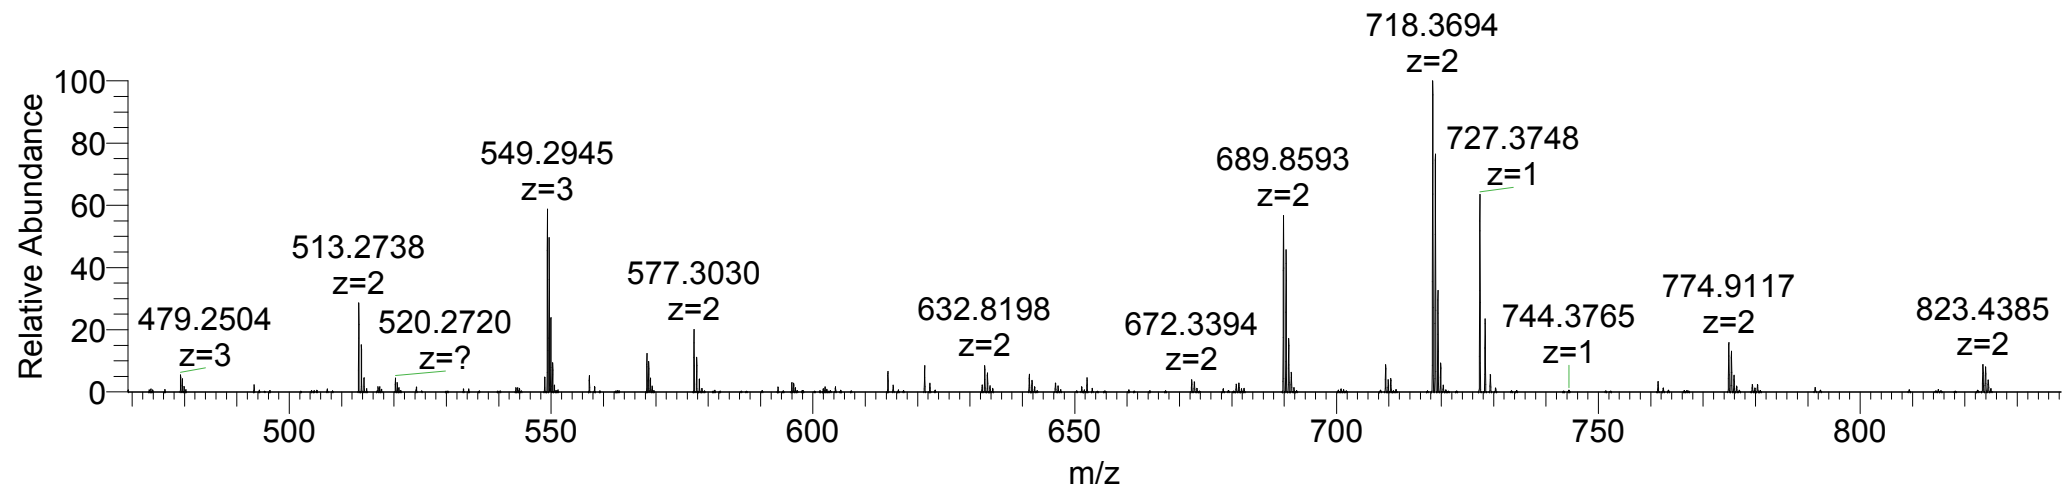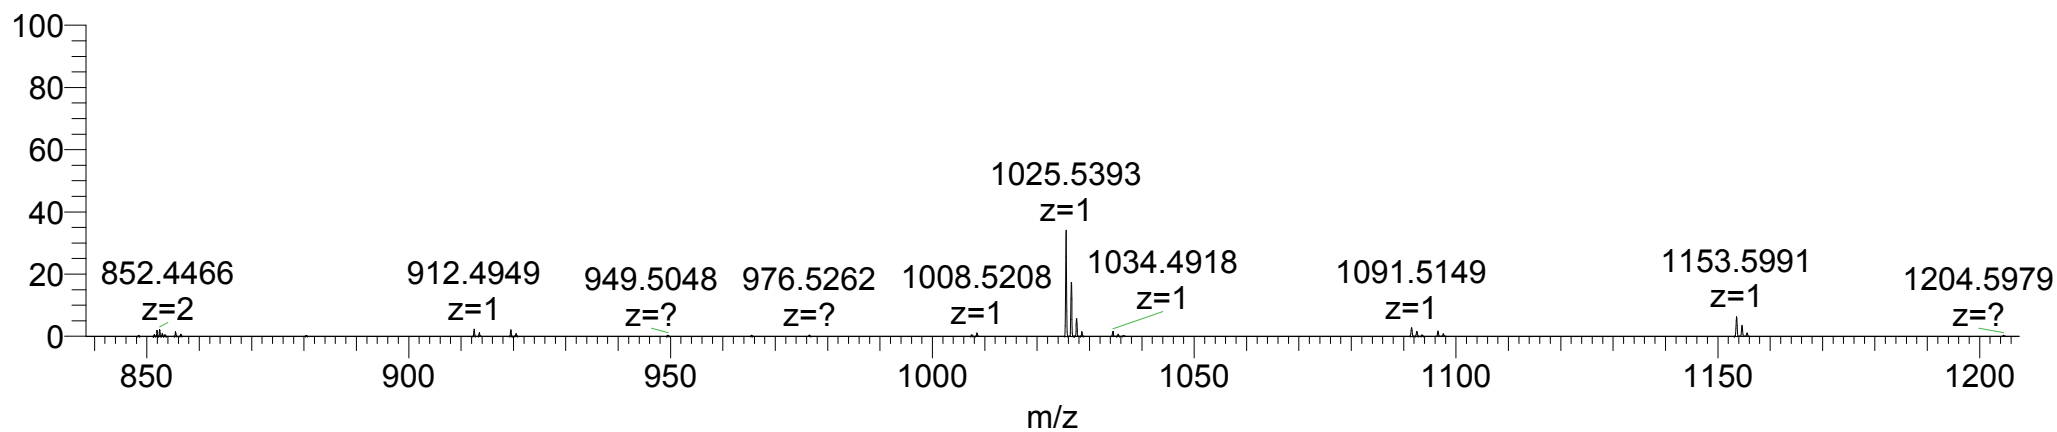

Bovine

57.

P885-OH

#880-890: GLRGIPPGPVGE

| Ion                       | charge state | Theoretical m/z (mono) | Experimental m/z (mono) | Mass error (Da) | Mass error (PPM) |
|---------------------------|--------------|------------------------|-------------------------|-----------------|------------------|
| [M+2H]+OH                 | 2            | 534.2958               | 534.2969                | 0.0022          | 2.1              |
| y1                        | 1            | 148.0604               | 148.0605                | 0.0001          | 0.7              |
| y2                        | 1            | 205.0819               | 205.0819                | 0.0000          | 0.0              |
| a4-NH3/PGPV-28+OH         | 1            | 339.2027               | 339.2028                | 0.0001          | 0.3              |
| a8+OH                     | 2            | 368.7269               | 368.7267                | -0.0004         | -0.5             |
| b4                        | 1            | 384.2354               | 384.2359                | 0.0005          | 1.3              |
| a5                        | 1            | 469.3245               | 469.3247                | 0.0002          | 0.4              |
| b5                        | 1            | 497.3194               | 497.3206                | 0.0012          | 2.4              |
| a7+OH                     | 1            | 639.3937               | 639.3930                | -0.0007         | -1.1             |
| b7+OH                     | 1            | 667.3886               | 667.3887                | 0.0001          | 0.2              |
| a9+OH/<br>LRGIPGPVG-28+OH | 1            | 835.5148               | 835.5155                | 0.0007          | 0.8              |
| b9+OH                     | 1            | 863.5098               | 863.5071                | -0.0027         | -3.1             |



4\_5\_2012Col5a1\_GluC\_HCD1 #4547 RT: 26.88 AV: 1 NL: 5.93E6

T: FTMS + p NSI d Full ms2 534.30@hcd35.00 [115.00-1080.00]

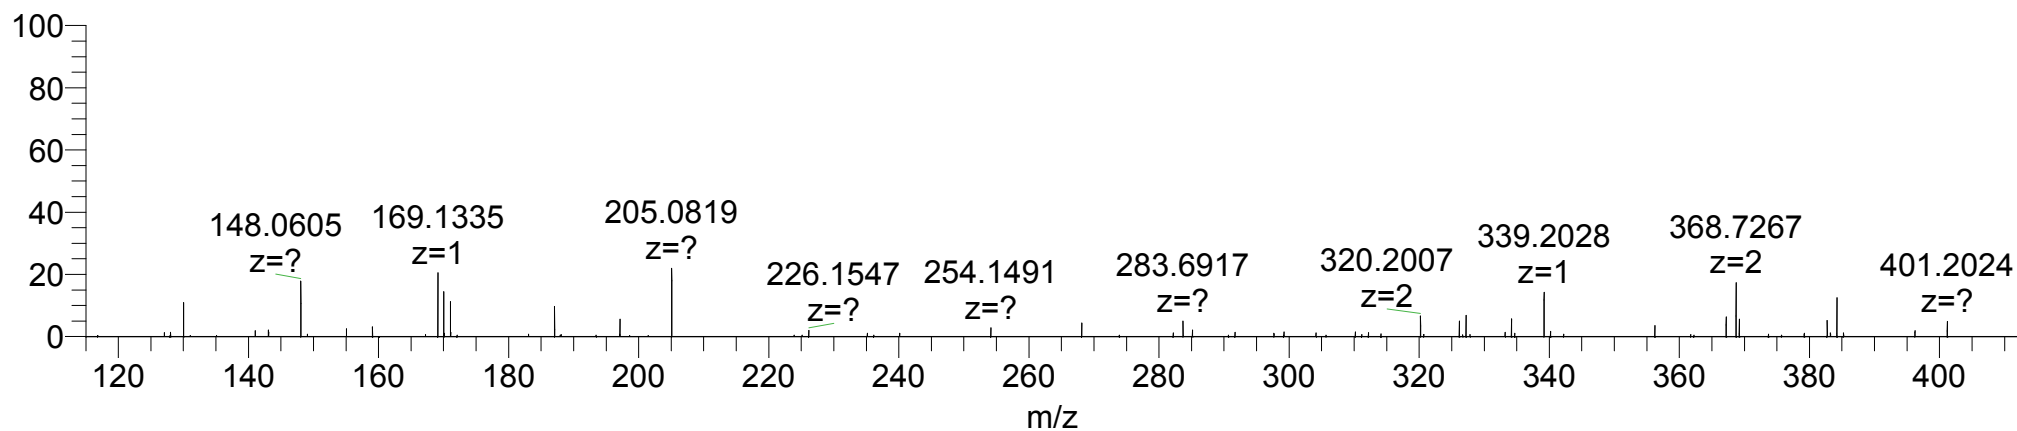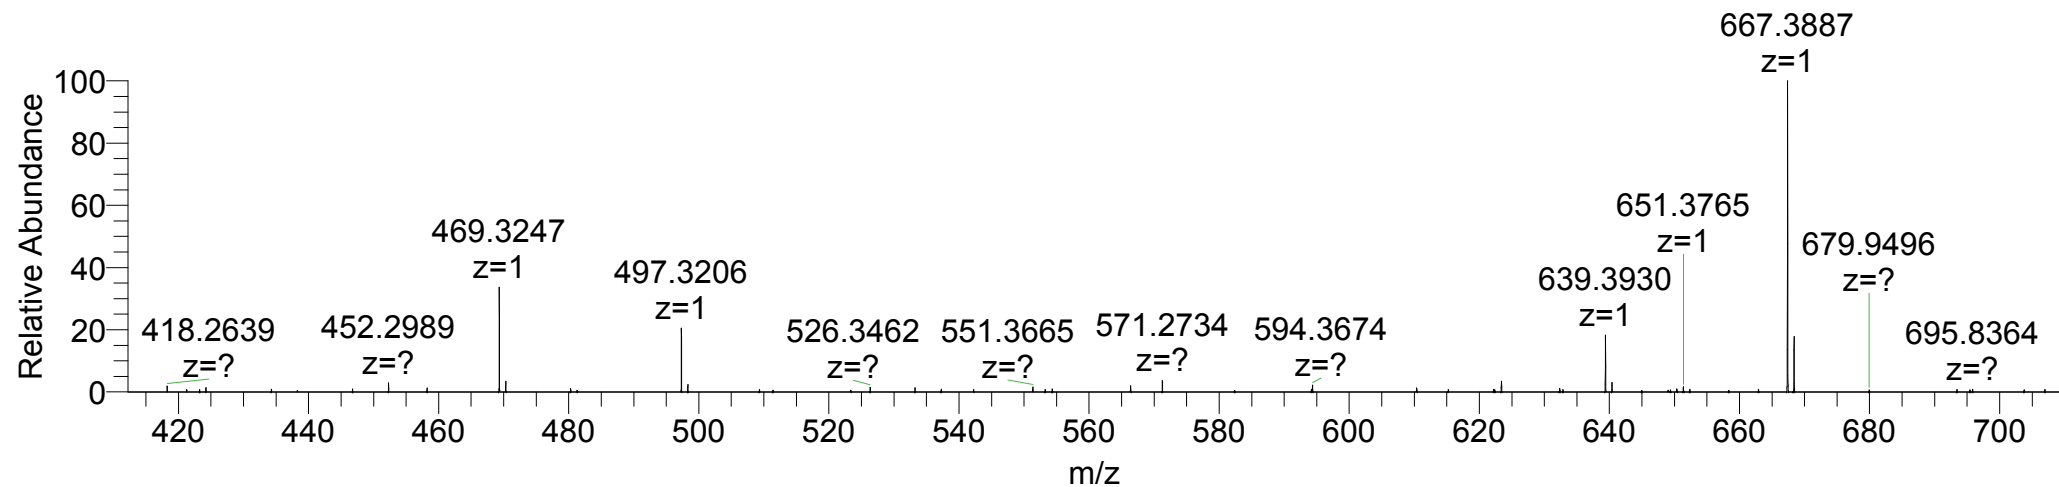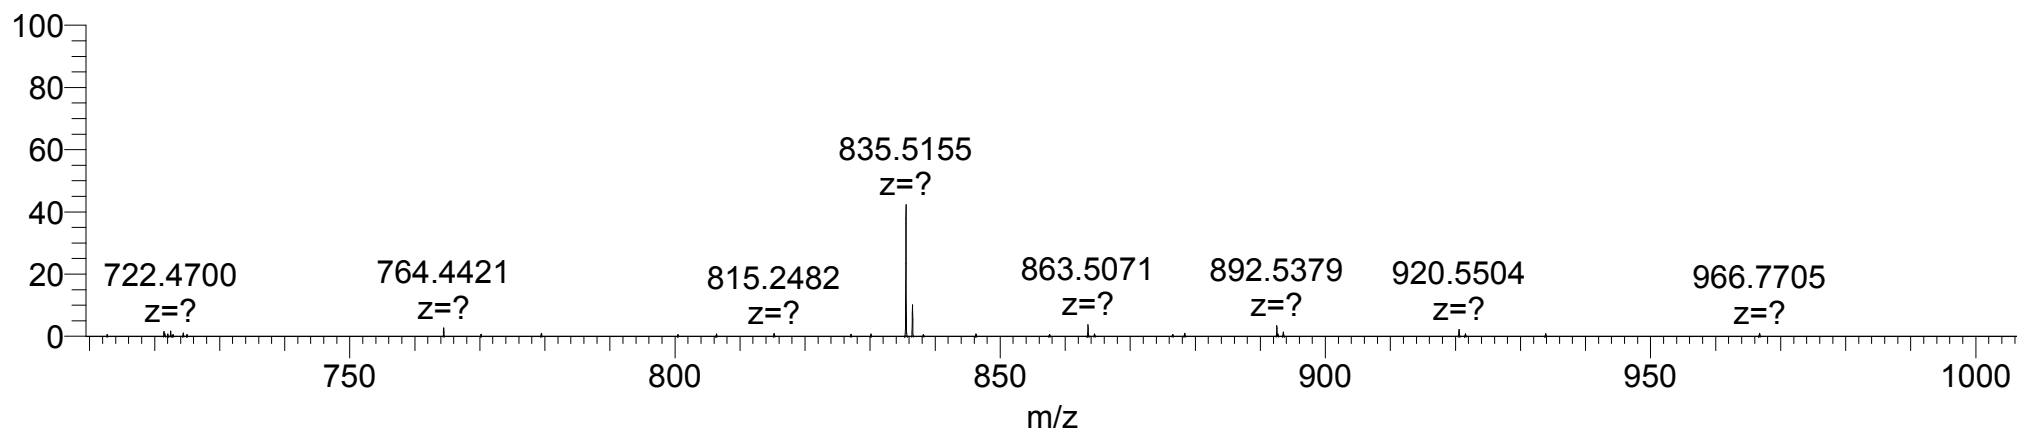

Bovine

58.

**P894-OH, P897-OH, P912-OH**

#882-914: RGIPGPVGEQGLPGAPPGPDPGPPGPMGPPGLPGL

| Ion        | charge state | Theoretical m/z (mono) | Experimental m/z (mono) | Mass error (Da) | Mass error (PPM) |
|------------|--------------|------------------------|-------------------------|-----------------|------------------|
| [M+3H]+5OH | 3            | 1025.8450              | 1025.8444               | -0.0018         | -0.6             |
| PG+OH      | 1            | 171.0764               | 171.0763                | -0.0001         | -0.6             |
| y3+OH      | 1            | 302.1710               | 302.1708                | -0.0002         | -0.7             |
| b3         | 1            | 327.2139               | 327.2137                | -0.0002         | -0.6             |
| PPGPM+OH   | 1            | 496.2224               | 496.2229                | 0.0005          | 1.0              |
| PGPMGP+OH  | 1            | 553.2439               | 553.2433                | -0.0006         | -1.1             |
| y7+OH      | 1            | 666.3821               | 666.3856                | 0.0035          | 5.3              |
| b9+OH      | 1            | 879.4683               | 879.4705                | 0.0022          | 2.5              |
| b11+OH     | 1            | 1064.5483              | 1064.5471               | -0.0012         | -1.1             |
| a12+OH     | 1            | 1149.6375              | 1149.6378               | 0.0003          | 0.3              |
| b12+OH     | 1            | 1177.6324              | 1177.6353               | 0.0029          | 2.5              |
| a15+2OH    | 1            | 1390.7437              | 1390.7435               | -0.0002         | -0.1             |
| b15+2OH    | 1            | 1418.7387              | 1418.7358               | -0.0029         | -2.0             |
| b17+3OH    | 1            | 1588.8078              | 1588.7924               | -0.0154         | -9.7             |
| b19+3OH    | 1            | 1800.8875              | 1800.8870               | -0.0005         | -0.3             |

\*Unlocalized sites: P885-OH?, P887-OH?, P902-OH?, P903-OH?, P905-OH?

Pseudolocalized sites: P885-OH, P903-OH

4\_5\_2012Col5a1\_Chmy\_HCD2 #9028 RT: 57.63 AV: 1 NL: 6.49E5

T: FTMS + p NSI d Full ms2 1026.51@hcd35.00 [115.00-2000.00]

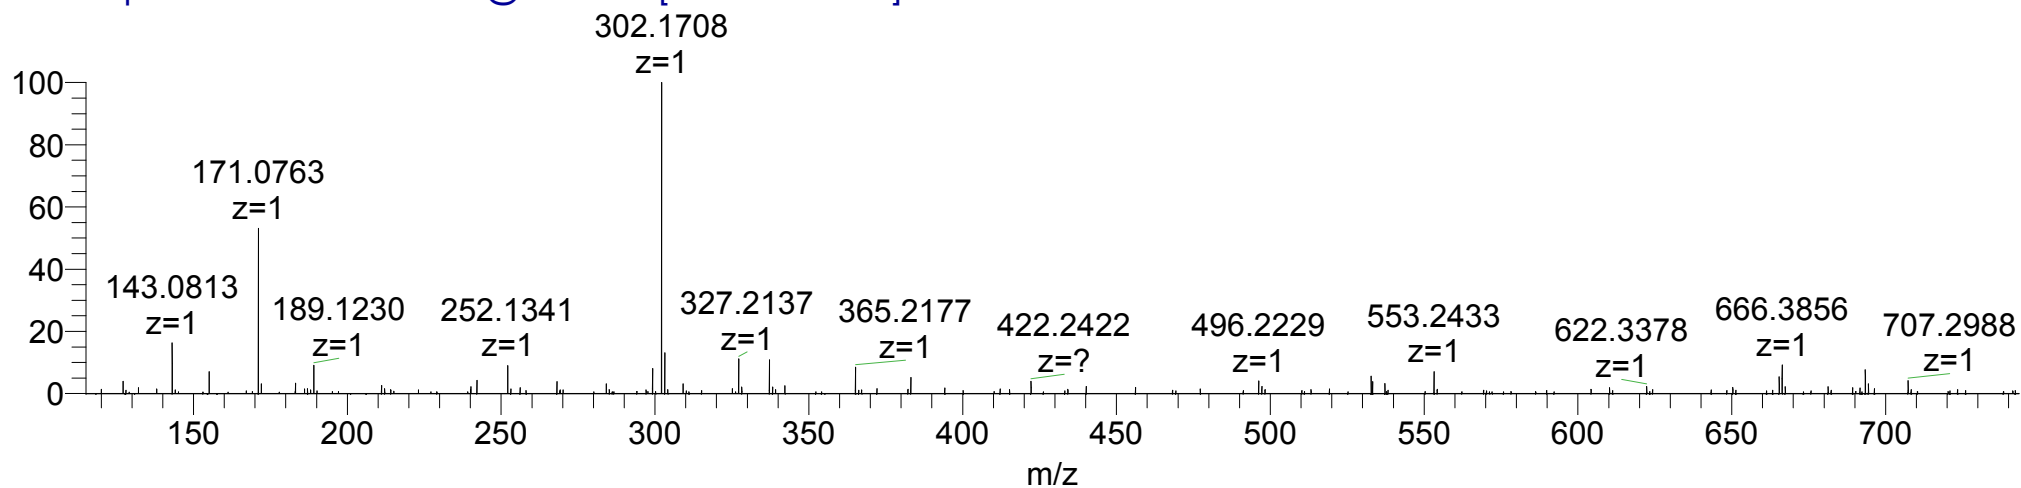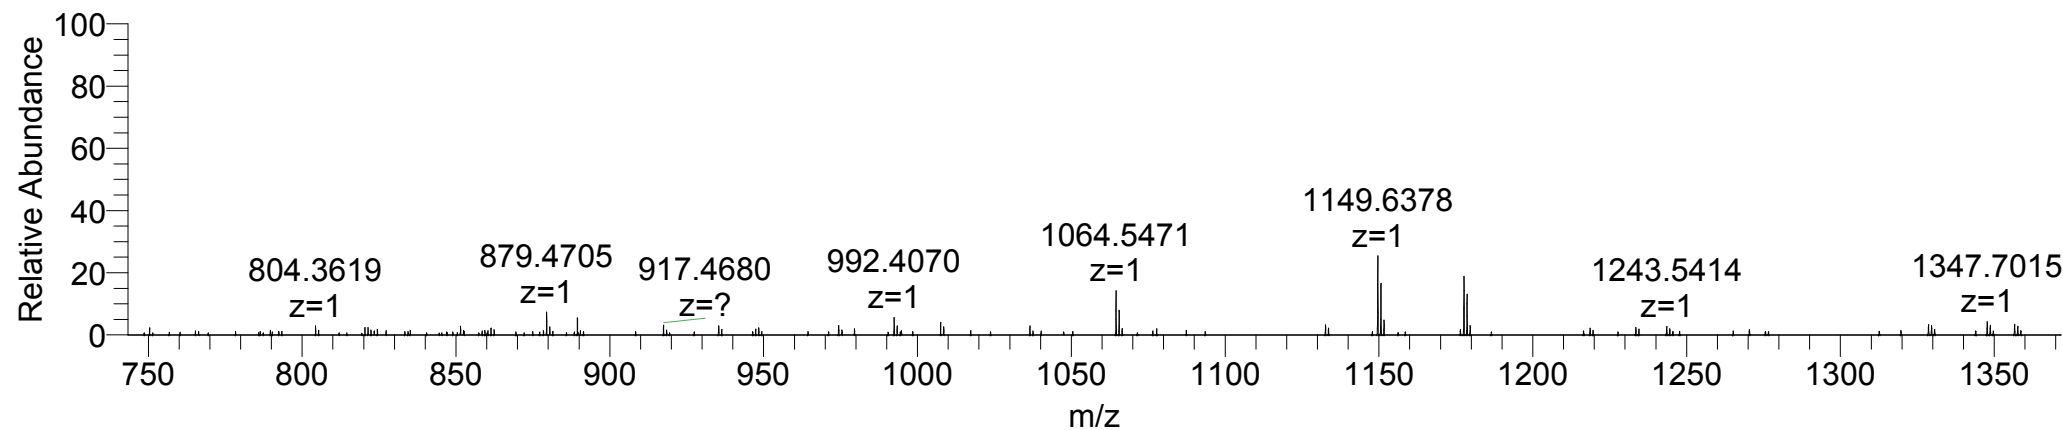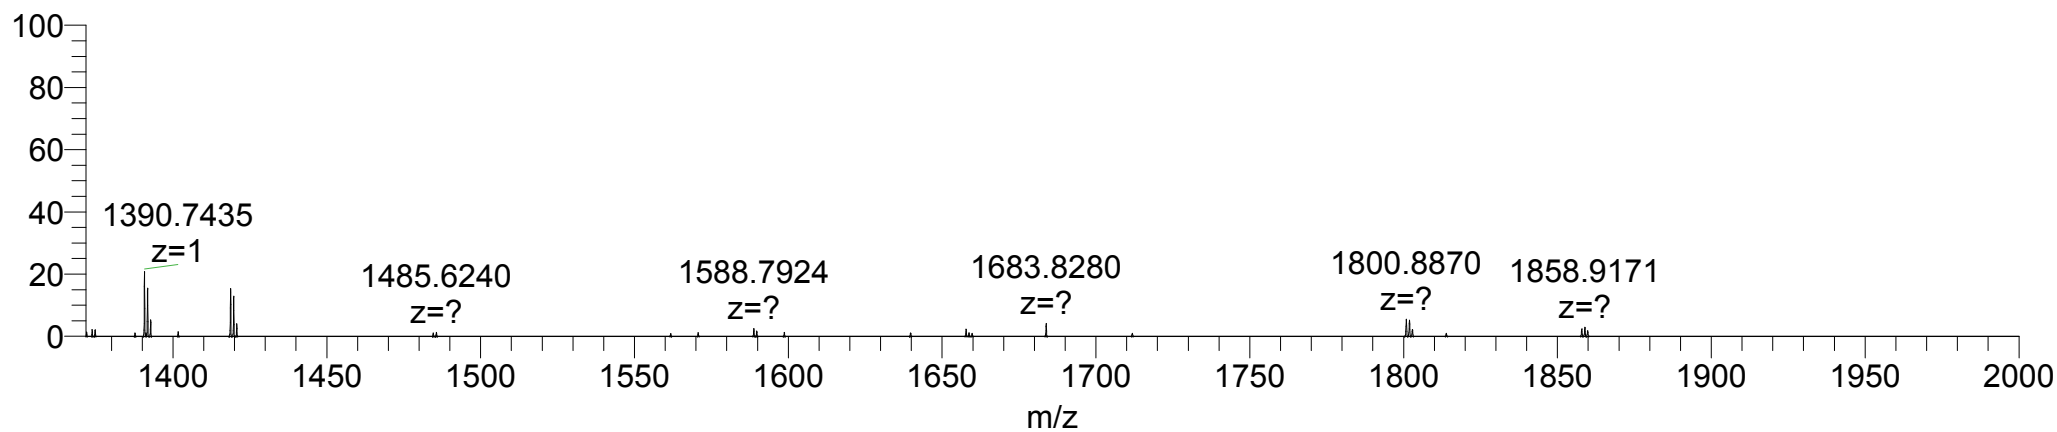

Bovine

59.

**K915-OH, K924-OH, P927-OH**

#915-932: KGDSGPKGEKGHPPGLIGL

| Ion                 | charge state | Theoretical m/z (mono) | Experimental m/z (mono) | Mass error (Da) | Mass error (PPM) |
|---------------------|--------------|------------------------|-------------------------|-----------------|------------------|
| [M+4H]+4OH+2Gal.Glc | 4            | 615.5406               | 615.5419                | 0.0052          | 2.1              |
| GL-28/GI-28         | 1            | 143.1179               | 143.1179                | 0.0000          | 0.0              |
| PG+OH               | 1            | 171.0764               | 171.0762                | -0.0002         | -1.2             |
| y2                  | 1            | 189.1234               | 189.1233                | -0.0001         | -0.5             |
| PGL+OH              | 1            | 284.1605               | 284.1605                | 0.0000          | 0.0              |
| b3+OH               | 1            | 317.1456               | 317.1450                | -0.0006         | -1.9             |
| PGLI-28+OH          | 1            | 369.2496               | 369.2506                | 0.0010          | 2.7              |
| b5-H2O              | 1            | 443.1885               | 443.1878                | -0.0007         | -1.6             |
| b15+4OH             | 3            | 503.9146               | 503.9153                | 0.0021          | 1.4              |
| y6+OH               | 1            | 585.3606               | 585.3608                | 0.0002          | 0.3              |
| a15+4OH             | 2            | 741.3708               | 741.3695                | -0.0026         | -1.8             |
| b15+4OH             | 2            | 755.3682               | 755.3696                | 0.0028          | 1.9              |
| b16+4OH             | 2            | 811.9103               | 811.9081                | -0.0044         | -2.7             |
| b17+4OH             | 2            | 840.4210               | 840.4214                | 0.0008          | 0.5              |
| [M+2H]+4OH          | 2            | 905.9683               | 905.9662                | -0.0042         | -2.3             |
| y11+2OH             | 1            | 1109.5949              | 1109.6046               | 0.0097          | 8.7              |
| b12+3OH             | 1            | 1226.5760              | 1226.5789               | 0.0029          | 2.4              |

\*Unlocalized sites: K915-OH.Gal.Glc?, P920-OH?, K921-OH.Gal.Glc?, K924-OH.Gal.Glc?

Pseudolocalized sites: K915-OH.Gal.Glc or K921-OH.Gal.Glc or K924-OH.Gal.Glc

4\_5\_2012Col5a1\_Chmy\_HCD1 #2911 RT: 19.07 AV: 1 NL: 3.80E5

T: FTMS + p NSI d Full ms2 615.79@hcd35.00 [115.00-2000.00]

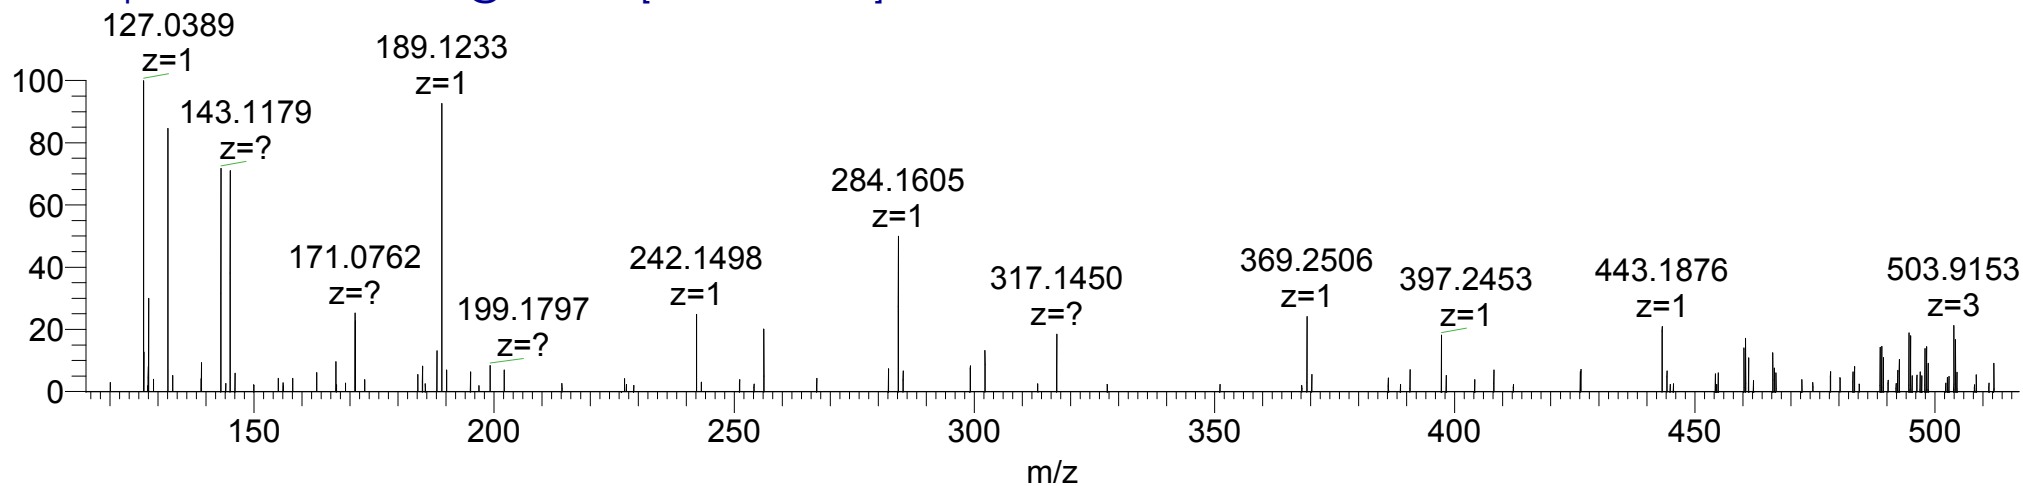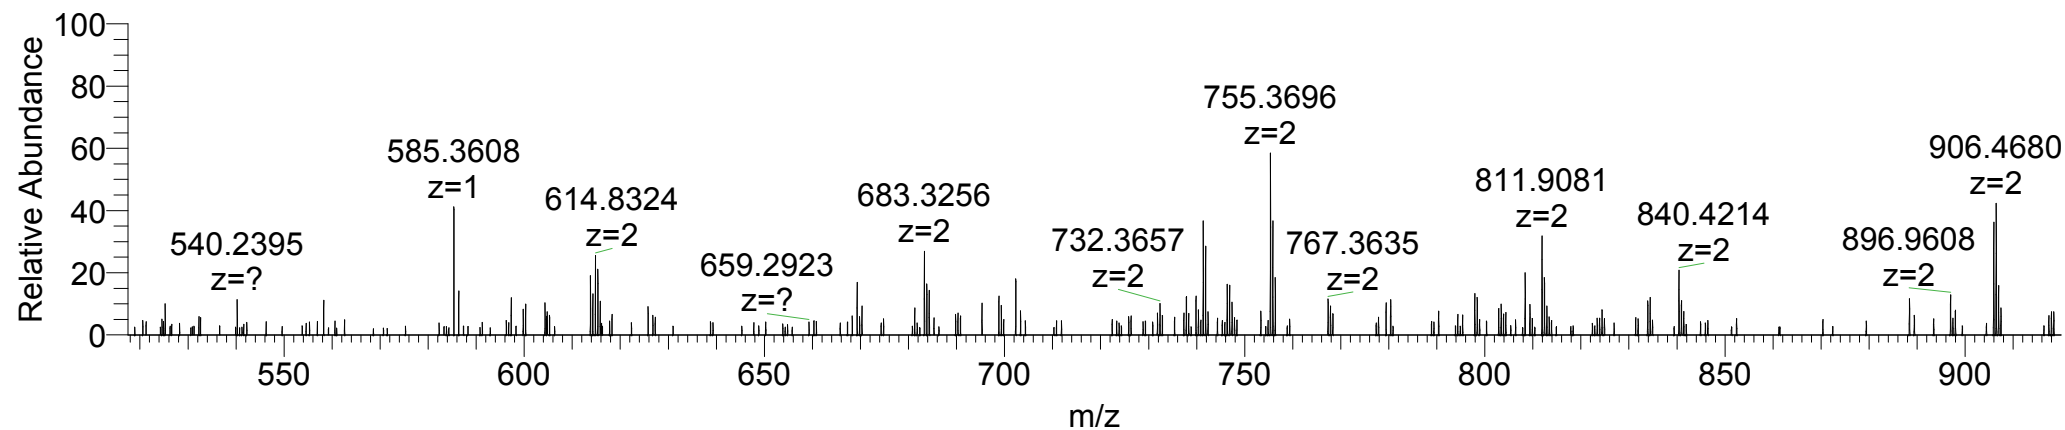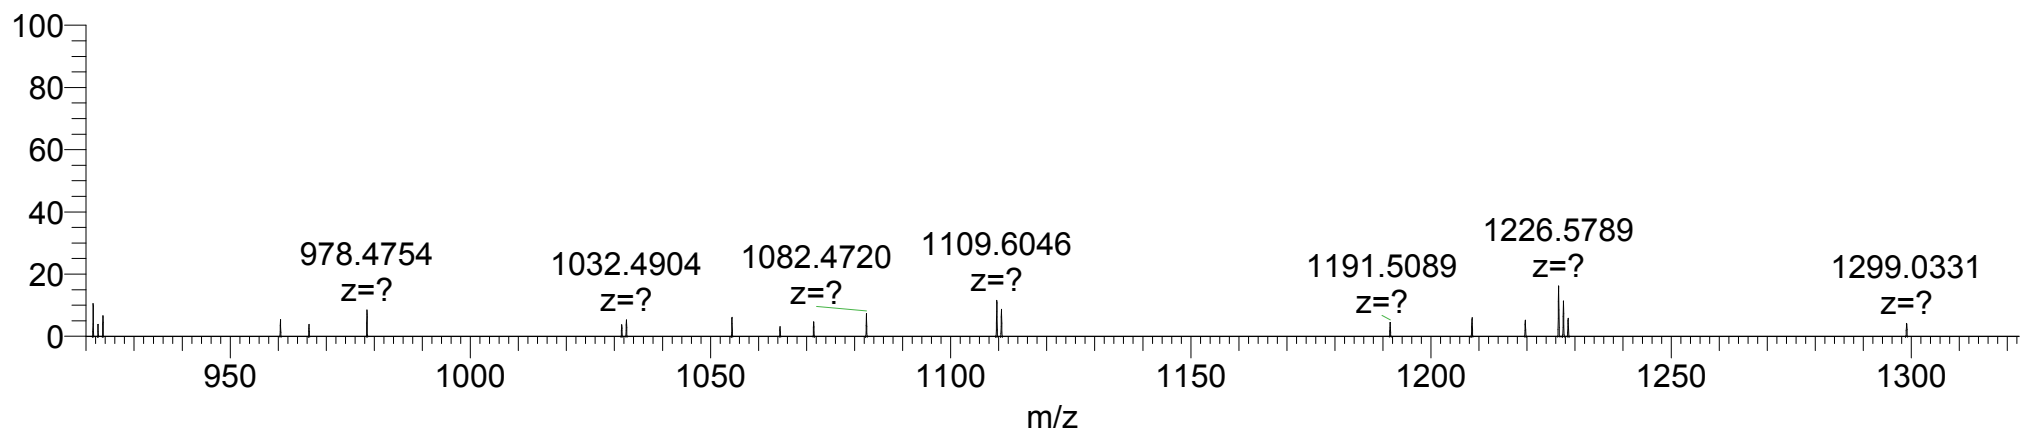

Bovine

60.

**K921-OH.Gal.Glc, K924-OH.Gal.Glc, P927-OH, P936-OH**

#917-938: DSGPKGEKGHPPGLIGLIGPPPGE

| Ion                 | charge state | Theoretical m/z (mono) | Experimental m/z (mono) | Mass error (Da) | Mass error (PPM) |
|---------------------|--------------|------------------------|-------------------------|-----------------|------------------|
| [M+2H]+4OH+2Gal.Glc | 2            | 1412.6533              | 1412.6548               | 0.0030          | 1.1              |
| GP-28               | 1            | 127.0866               | 127.0864                | -0.0002         | -1.6             |
| GP                  | 1            | 155.0815               | 155.0814                | -0.0001         | -0.6             |
| PV                  | 1            | 242.1499               | 242.1496                | -0.0003         | -1.2             |
| y3+OH               | 1            | 318.1296               | 318.1293                | -0.0003         | -0.9             |
| y4+OH               | 1            | 415.1823               | 415.1820                | -0.0003         | -0.7             |
| y5+OH               | 1            | 472.2038               | 472.2034                | -0.0004         | -0.8             |
| PGLIGL+OH           | 1            | 567.3501               | 567.3496                | -0.0005         | -0.9             |
| a13+3OH             | 2            | 640.8151               | 640.8168                | 0.0034          | 2.7              |
| y6+OH               | 1            | 585.2879               | 585.2869                | -0.0010         | -1.7             |
| b7+OH               | 1            | 687.2944               | 687.2921                | -0.0023         | -3.4             |
| b15+3OH             | 2            | 739.8653               | 739.8632                | -0.0042         | -2.8             |
| b16+3OH             | 2            | 796.4047               | 796.4073                | 0.0052          | 3.3              |
| b10+2OH             | 1            | 1025.4647              | 1025.4667               | 0.0020          | 2.0              |
| y12+2OH             | 1            | 1151.6307              | 1151.6392               | 0.0085          | 7.4              |
| y14+2OH             | 1            | 1345.7110              | 1345.6865               | -0.0245         | -18.2            |
| b14+3OH             | 1            | 1421.7019              | 1421.6946               | -0.0073         | -5.1             |
| b16+3OH             | 1            | 1591.8075              | 1591.8126               | 0.0051          | 3.2              |
| b17+3OH             | 1            | 1704.8915              | 1704.8879               | -0.0036         | -2.1             |

4\_5\_2012Col5a1\_GluCandAspN\_HCD1 #5626 RT: 25.18 AV: 1 NL: 4.48E5

T: FTMS + p NSI d Full ms2 1413.66@hcd35.00 [115.00-2000.00]

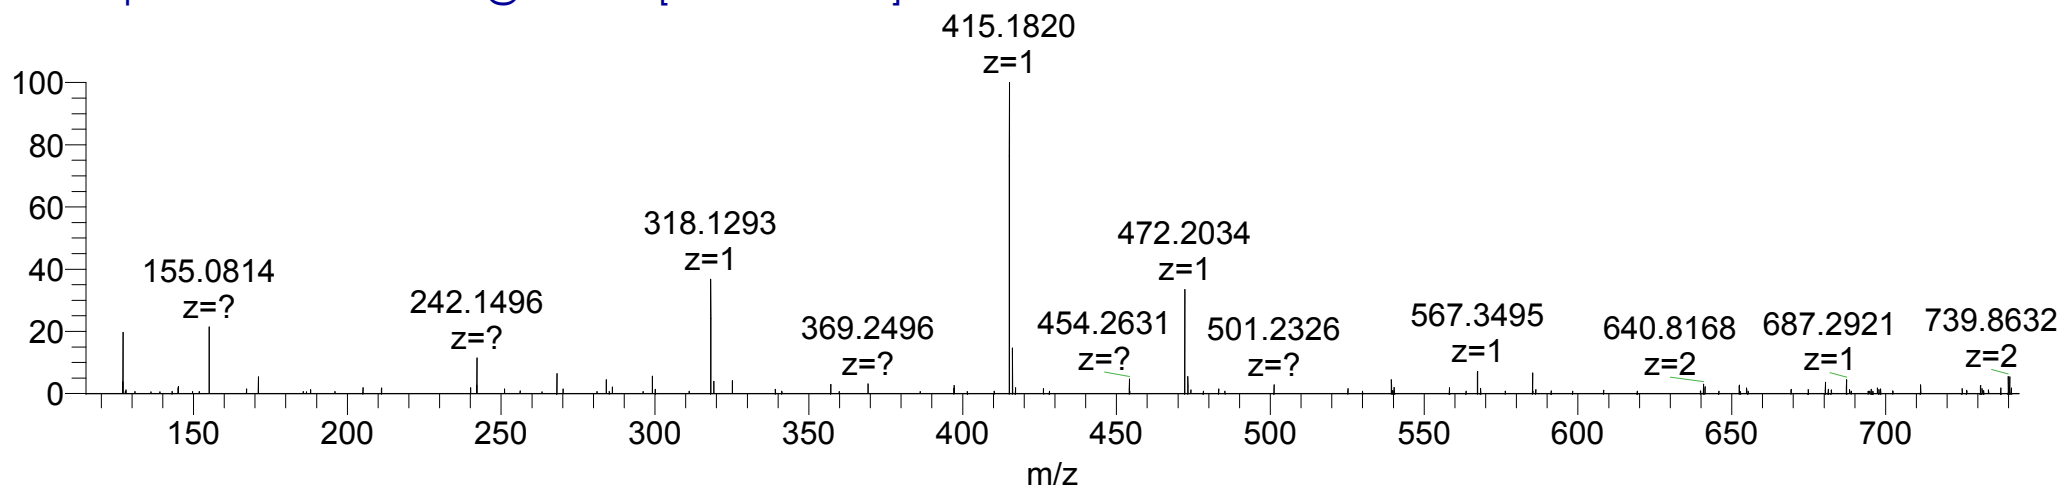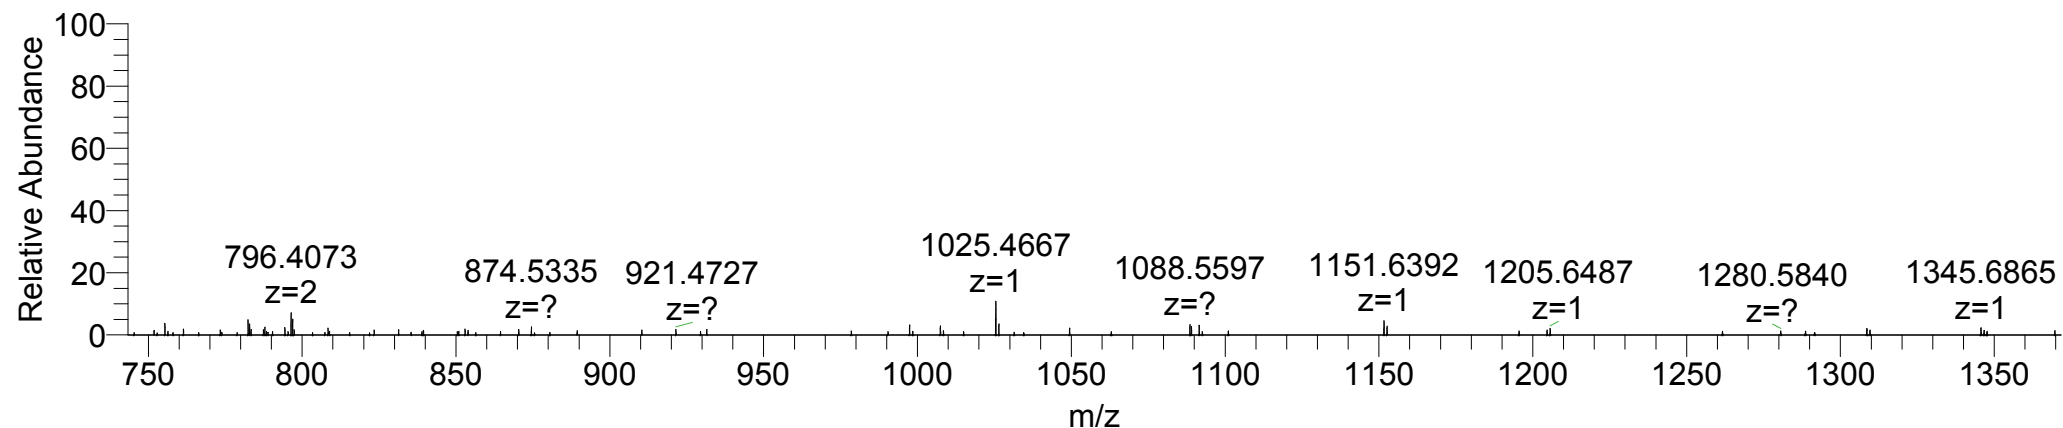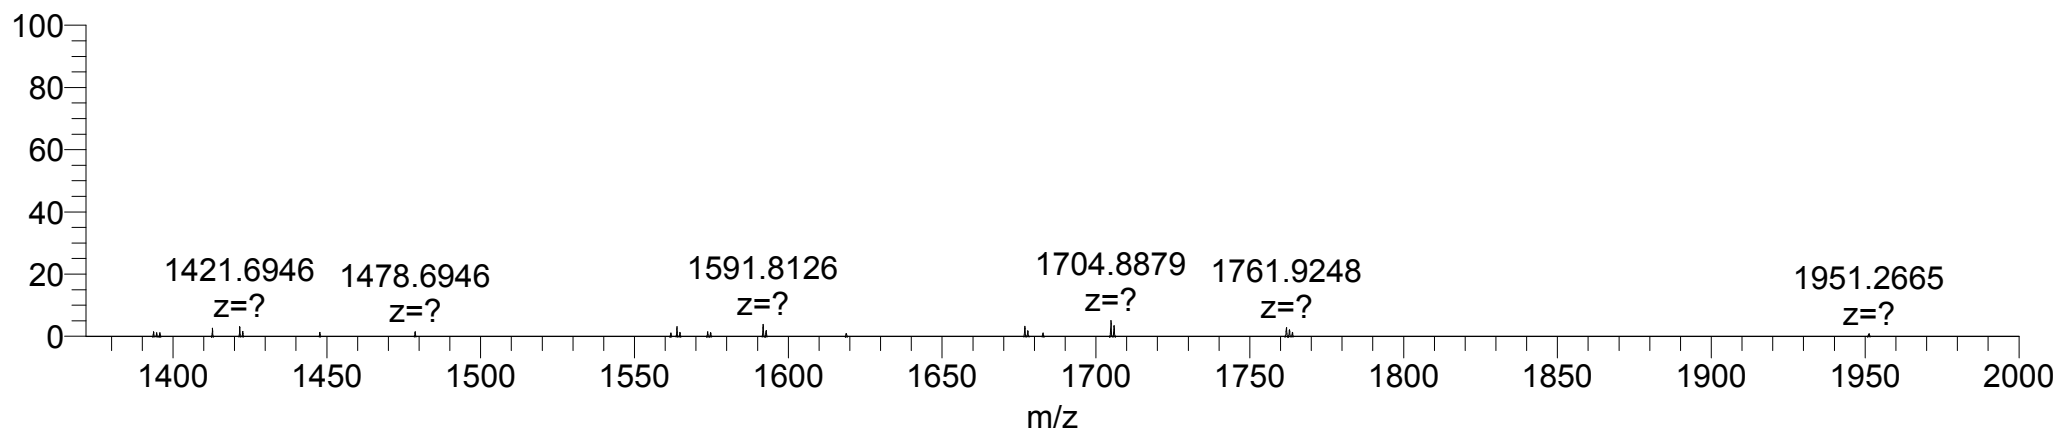

Bovine

61.

**K942-OH.Gal.Glc, P948-OH, K957-OH.Gal.Glc**

#942-959: **KGDRGVPGPQGSSGPKGE**

| Ion                 | charge state | Theoretical m/z (mono) | Experimental m/z (mono) | Mass error (Da) | Mass error (PPM) |
|---------------------|--------------|------------------------|-------------------------|-----------------|------------------|
| [M+3H]+3OH+2Gal.Glc | 3            | 802.6890               | 802.6888                | -0.0006         | -0.2             |
| y2                  | 1            | 205.0819               | 205.0817                | -0.0002         | -1.0             |
| VPG-18+OH           | 1            | 242.1499               | 242.1500                | 0.0001          | 0.4              |
| GVPG-28+OH          | 1            | 299.1714               | 299.1713                | -0.0001         | -0.3             |
| PGPQ+OH             | 1            | 396.1878               | 396.1881                | 0.0003          | 0.8              |
| y4+OH               | 1            | 446.2245               | 446.2244                | -0.0001         | -0.2             |
| y5+OH               | 1            | 503.2460               | 503.2460                | 0.0000          | 0.0              |
| y6+OH               | 1            | 590.2780               | 590.2794                | 0.0014          | 2.4              |
| a6+OH               | 1            | 601.3416               | 601.3429                | 0.0013          | 2.2              |
| b6+OH               | 1            | 629.3365               | 629.3370                | 0.0005          | 0.8              |
| b14+2OH             | 2            | 656.8156               | 656.8151                | -0.0010         | -0.8             |
| y8+OH               | 1            | 734.3315               | 734.3316                | 0.0001          | 0.1              |
| b16+2OH             | 2            | 777.3870               | 777.3860                | -0.0020         | -1.3             |
| b8+2OH              | 1            | 799.4057               | 799.4042                | -0.0015         | -1.9             |
| [M+2H]+4OH          | 2            | 879.4243               | 879.4244                | 0.0002          | 0.1              |
| b10+3OH             | 1            | 1024.5170              | 1024.5171               | 0.0001          | 0.1              |
| y12+2OH             | 1            | 1129.5120              | 1129.5120               | 0.0000          | 0.0              |
| b14+2OH             | 1            | 1312.6240              | 1312.6238               | -0.0002         | -0.2             |
| [M+H]+3OH           | 1            | 1757.8413              | 1757.8402               | -0.0011         | -0.6             |



4\_5\_2012Col5a1\_GluC\_HCD1 #1285 RT: 10.46 AV: 1 NL: 2.51E4

T: FTMS + p NSI d Full ms2 802.69@hcd35.00 [115.00-2000.00]

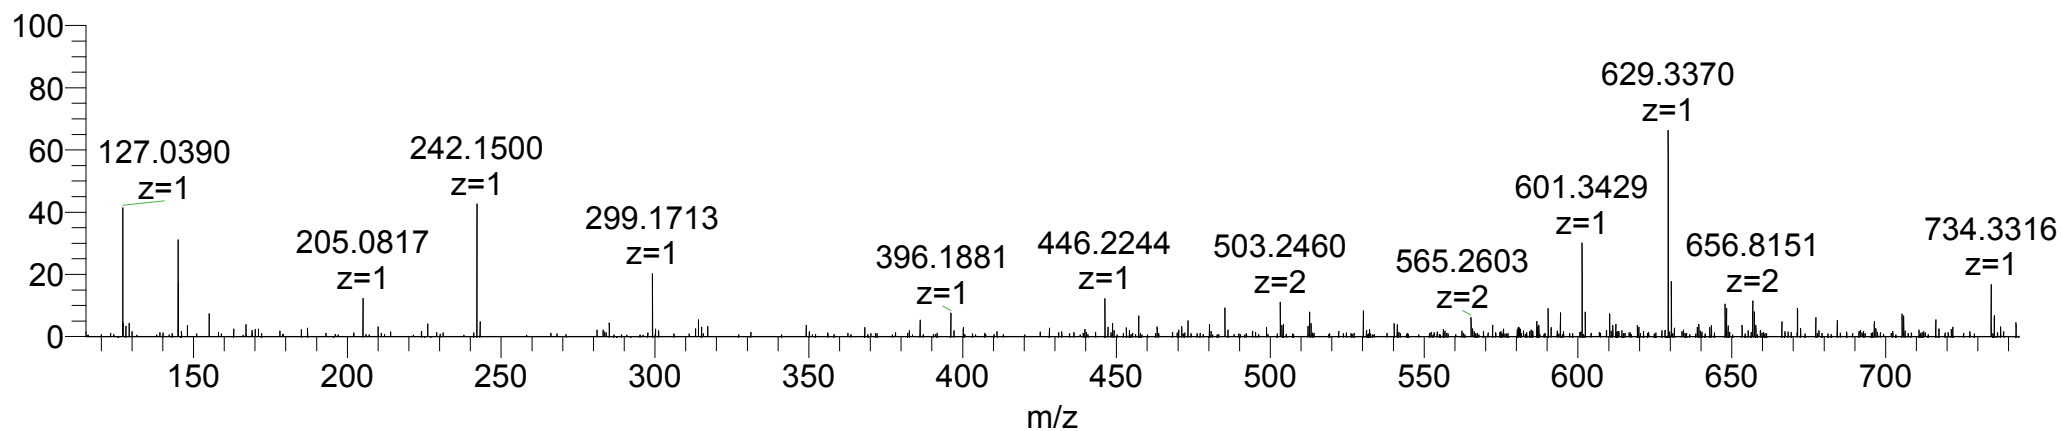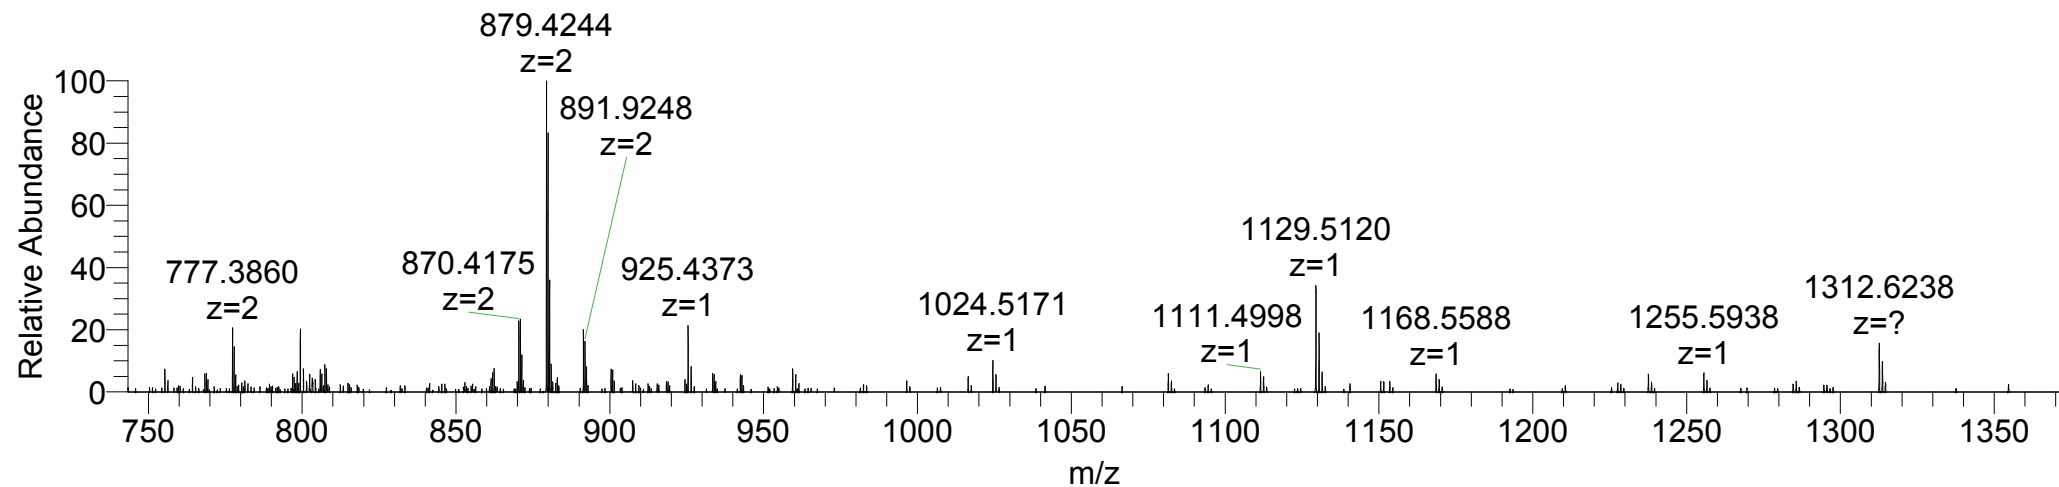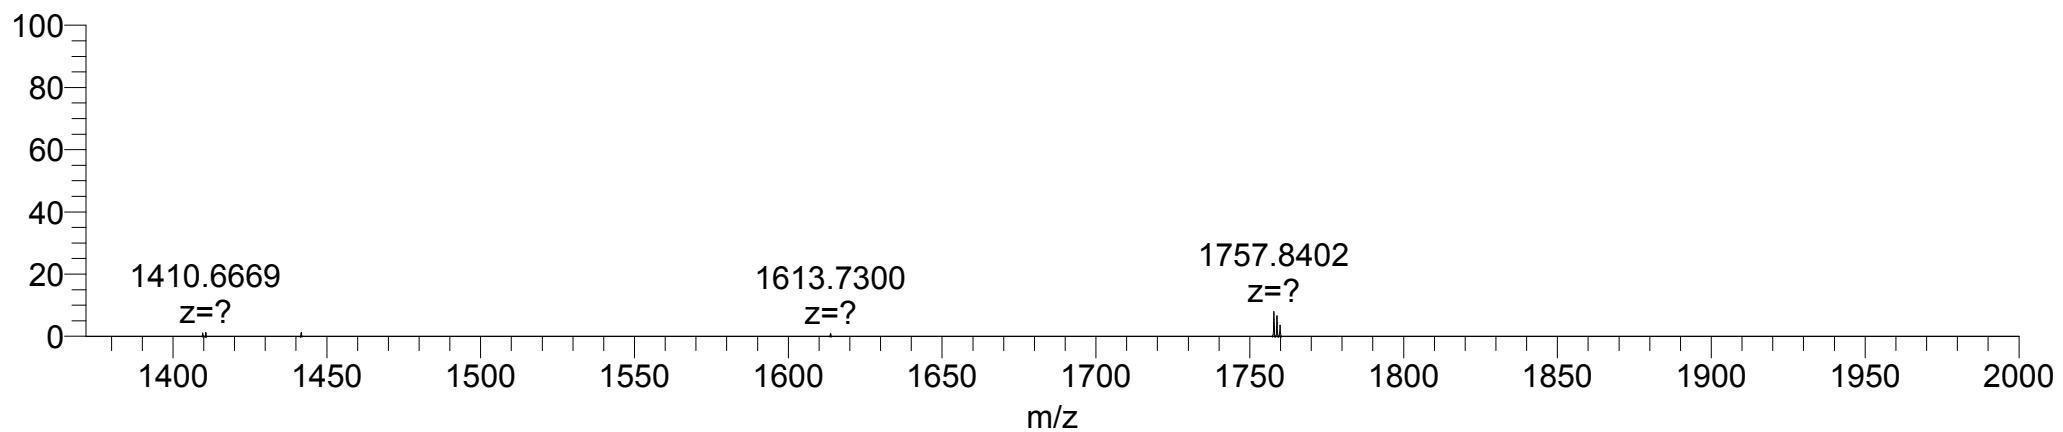

Bovine

62.

P1002-OH, P1004-OH, P1005-OH, P1007-OH, P1008-OH, P1010-OH, P1011-OH

#999-1013: AGQPGPPPGPPPGPPGEV

| Ion          | charge state | Theoretical m/z (mono) | Experimental m/z (mono) | Mass error (Da) | Mass error (PPM) |
|--------------|--------------|------------------------|-------------------------|-----------------|------------------|
| [M+2H]+7OH   | 2            | 712.3022               | 712.3035                | 0.0026          | 1.8              |
| b2/Q         | 1            | 129.0659               | 129.0659                | 0.0000          | 0.0              |
| PG+OH        | 1            | 171.0764               | 171.0764                | 0.0000          | 0.0              |
| b3           | 1            | 257.1244               | 257.1247                | 0.0003          | 1.2              |
| GPP+2OH      | 1            | 284.1241               | 284.1243                | 0.0002          | 0.7              |
| y3+OH        | 1            | 318.1296               | 318.1297                | 0.0001          | 0.3              |
| GPPG+2OH     | 1            | 341.1456               | 341.1457                | 0.0001          | 0.3              |
| PGPP+3OH     | 1            | 397.1718               | 397.1713                | -0.0005         | -1.3             |
| y4+2OH       | 1            | 431.1773               | 431.1774                | 0.0001          | 0.2              |
| PGPPG+3OH    | 1            | 454.1932               | 454.1933                | 0.0001          | 0.2              |
| y5+2OH       | 1            | 488.1987               | 488.1983                | -0.0004         | -0.8             |
| b6+2OH       | 1            | 540.2413               | 540.2433                | 0.0020          | 3.7              |
| PGPPGP+4OH   | 1            | 567.2409               | 567.2410                | 0.0001          | 0.2              |
| y6+3OH       | 1            | 601.2464               | 601.2467                | 0.0003          | 0.5              |
| GPPGPPG+4OH  | 1            | 624.2624               | 624.2623                | -0.0001         | -0.2             |
| y7+4OH       | 1            | 714.2941               | 714.2941                | 0.0000          | 0.0              |
| GPPGPPGP+5OH | 1            | 737.3101               | 737.3102                | 0.0001          | 0.1              |
| y8+4OH       | 1            | 771.3155               | 771.3148                | -0.0007         | -0.9             |
| y9+5OH       | 1            | 884.3632               | 884.3637                | 0.0005          | 0.6              |
| y10+6OH      | 1            | 997.4109               | 997.4110                | 0.0001          | 0.1              |
| y11+6OH      | 1            | 1054.4324              | 1054.4316               | -0.0008         | -0.8             |
| y12+7OH      | 1            | 1167.4800              | 1167.4783               | -0.0017         | -1.5             |

4\_5\_2012Col5a1\_GluC\_HCD2 #737 RT: 6.07 AV: 1 NL: 2.14E4

T: FTMS + p NSI d Full ms2 712.30@hcd35.00 [115.00-1435.00]

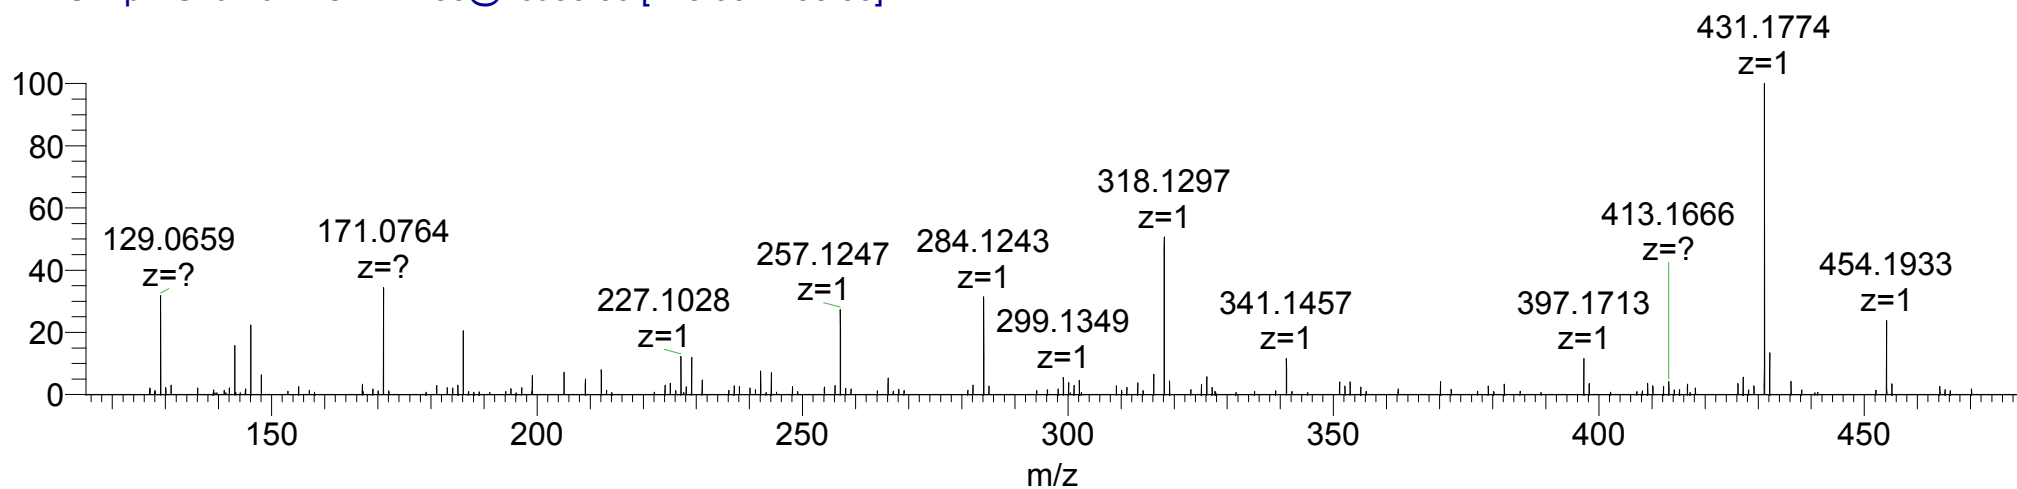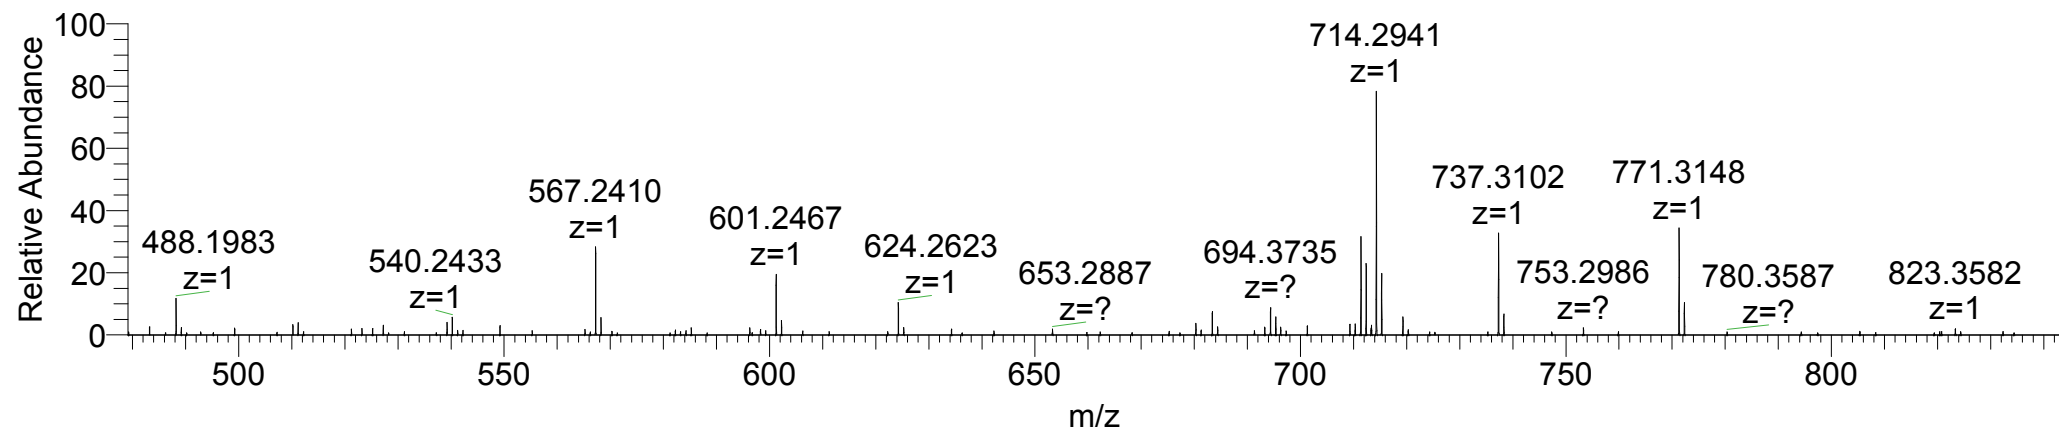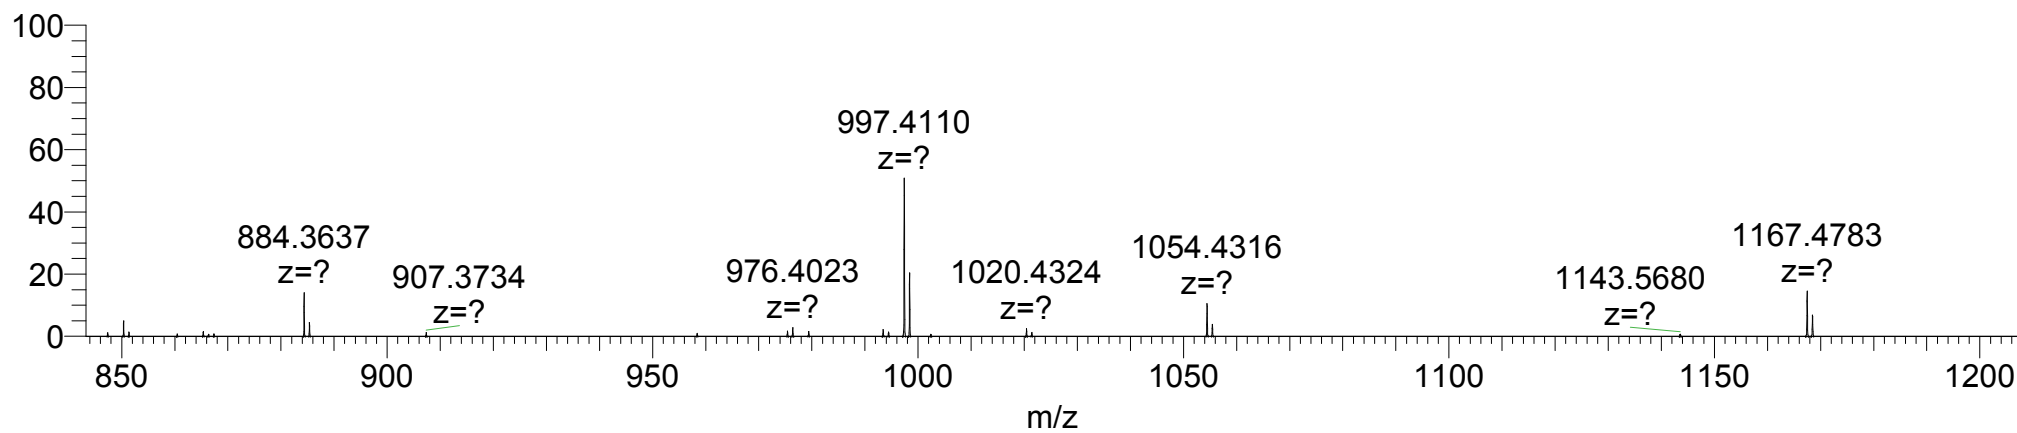

Supplement: supp_M112.406850_jbc.M112.406850-4.pdf [file supp_M112.406850_jbc.M112.406850-4.pdf]
