# Supplementary material
Source: PubMed Central journal article supplement (PMC3504773)

Human

## Supplemental Spectra S2

Tandem mass spectra of peptides derived from human recombinant pro-alpha 1(V) collagen.

Each spectrum is accompanied by a table of sequence-specific product ions identified from the spectrum along with product ion mass errors. Localized modifications are indicated above the table and are identified as bold letters in the peptide sequence. Unlocalized and pseudolocalized sites of modification are also given. Note: each product ion in the table met the requirements of having  $< 10$  ppm mass error and a signal-to-noise ratio  $> 3$ .

Human

1.

**P435-OH**

#422-438: DPTSSPSEIGPGMPANQ

| Ion                  | charge state | Theoretical m/z (mono) | Experimental m/z (mono) | Mass error (Da) | Mass error (PPM) |
|----------------------|--------------|------------------------|-------------------------|-----------------|------------------|
| [M+2H]+OH            | 2            | 850.8750               | 850.8673                | -0.0154         | -9.1             |
| y1/SS-28             | 1            | 147.0764               | 147.0754                | -0.0010         | -6.8             |
| a2/PS/PA-OH          | 1            | 185.0921               | 185.0909                | -0.0012         | -6.5             |
| y2-NH3               | 1            | 244.0928               | 244.0911                | -0.0017         | -7.0             |
| y2                   | 1            | 261.1193               | 261.1173                | -0.0020         | -7.7             |
| PAN+OH               | 1            | 299.1350               | 299.1328                | -0.0022         | -7.4             |
| y4-NH3+OH            | 1            | 428.1776               | 428.1741                | -0.0035         | -8.2             |
| y4+OH                | 1            | 445.2041               | 445.2007                | -0.0034         | -7.7             |
| b5-H2O/<br>SSPSE-H2O | 1            | 470.1882               | 470.1835                | -0.0047         | -10.0            |
| y5+OH                | 1            | 576.2446               | 576.2396                | -0.0050         | -8.7             |
| y7+OH                | 1            | 730.3189               | 730.3131                | -0.0058         | -8.0             |
| y8+OH                | 1            | 787.3403               | 787.3341                | -0.0062         | -7.9             |
| b9                   | 1            | 914.4102               | 914.4033                | -0.0069         | -7.6             |
| b10                  | 1            | 971.4316               | 971.4238                | -0.0078         | -8.0             |
| b12                  | 1            | 1125.5059              | 1125.5010               | -0.0049         | -4.4             |
| b13                  | 1            | 1256.5463              | 1256.5400               | -0.0063         | -5.0             |

12\_9\_2011Col5a1\_AspNGluC\_1 #2777 RT: 24.72 AV: 1 NL: 8.38E4

T: FTMS + c NSI d Full ms2 850.87@hcd30.00 [100.00-1715.00]

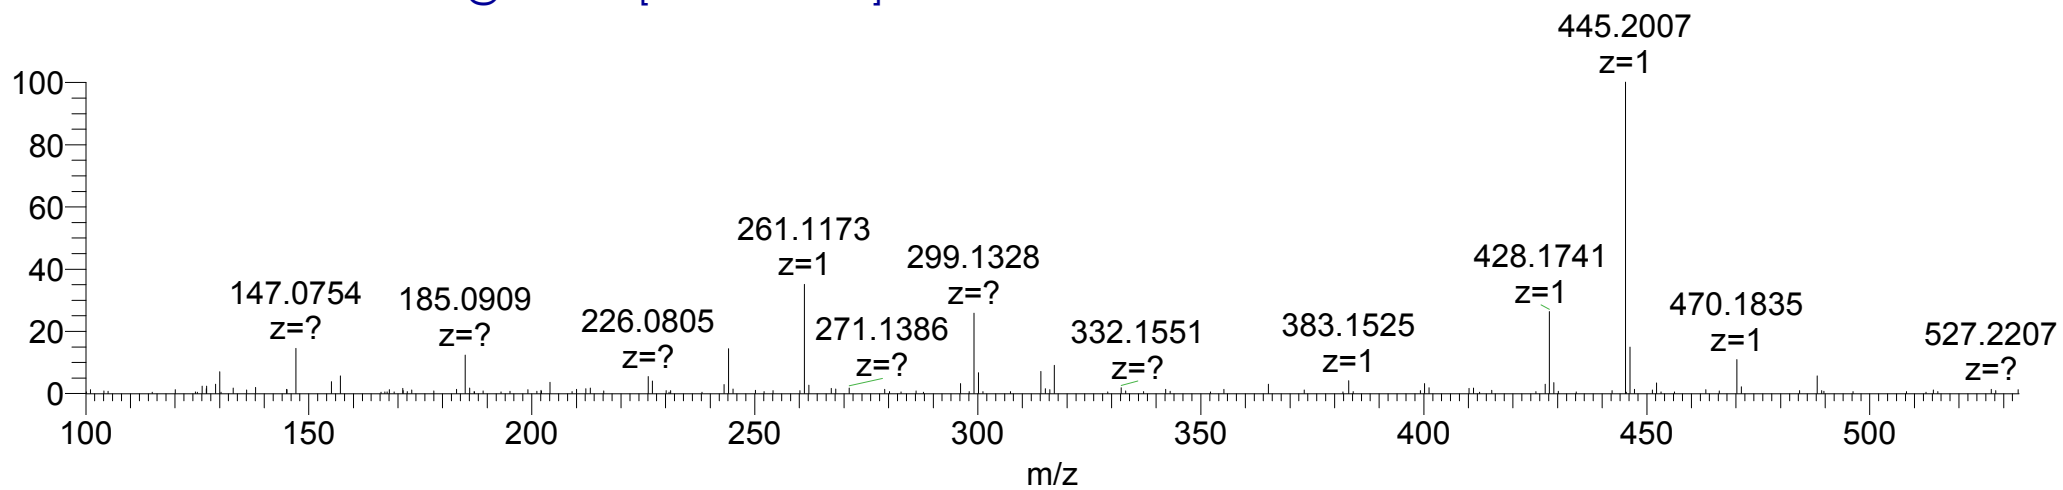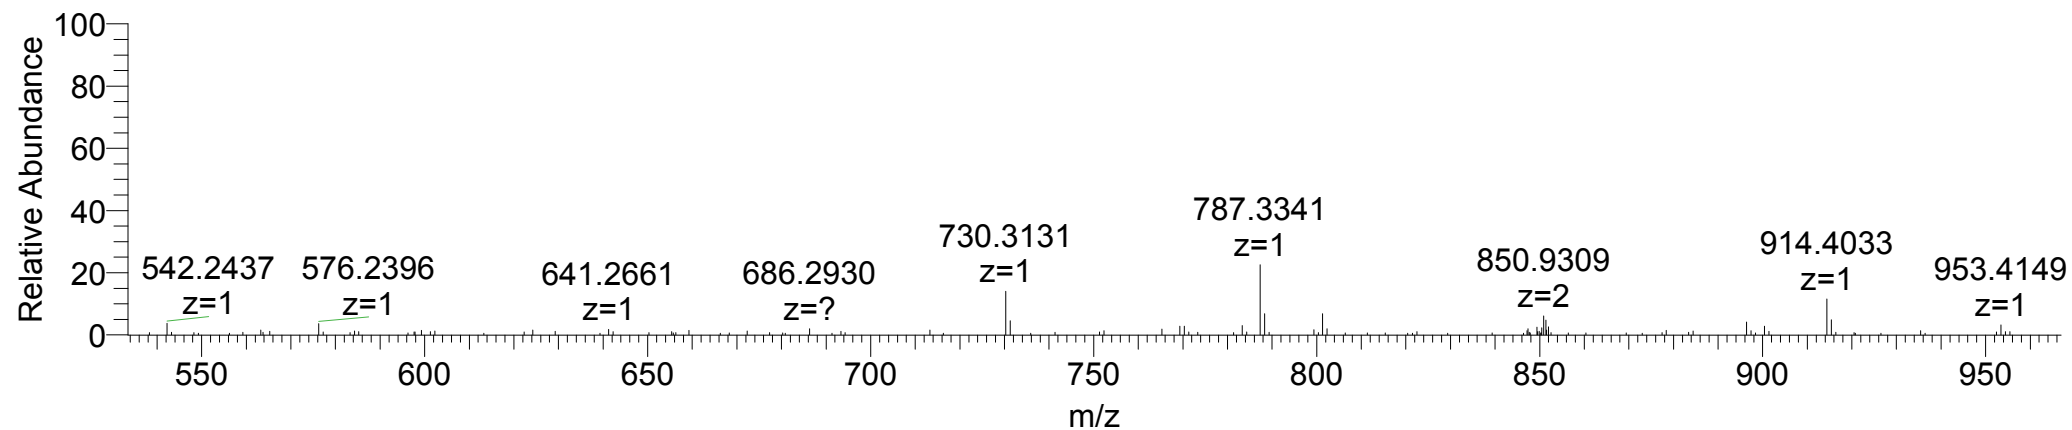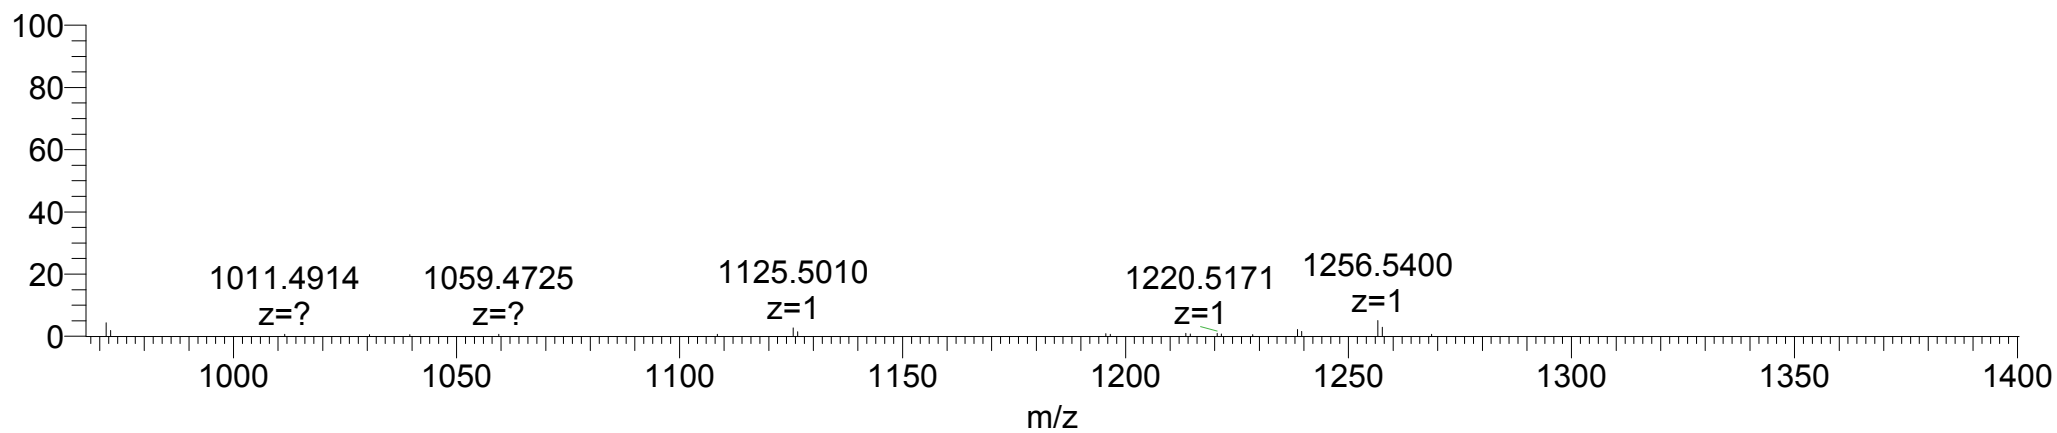

Human

2.

**K452-OH.Gal.Glc, K455-OH.Gal.Glc**

#443-466: EGIGGPRGEKGQKGEPAIIEPGML

| Ion                 | charge state | Theoretical m/z (mono) | Experimental m/z (mono) | Mass error (Da) | Mass error (PPM) |
|---------------------|--------------|------------------------|-------------------------|-----------------|------------------|
| [M+3H]+2OH+2Gal.Glc | 3            | 1034.1586              | 1034.1625               | 0.0117          | 3.8              |
| GP                  | 1            | 155.0815               | 155.0812                | -0.0003         | -1.9             |
| EP-H2O              | 1            | 209.0921               | 209.0916                | -0.0005         | -2.4             |
| y2                  | 1            | 263.1424               | 263.1419                | -0.0005         | -1.9             |
| PGM                 | 1            | 286.1220               | 286.1216                | -0.0004         | -1.4             |
| y4                  | 1            | 417.2166               | 417.2160                | -0.0006         | -1.4             |
| b7                  | 1            | 667.3522               | 667.3495                | -0.0027         | -4.1             |
| b9                  | 1            | 853.4163               | 853.4142                | -0.0021         | -2.5             |
| b18+2OH             | 2            | 897.4607               | 897.4598                | -0.0018         | -1.0             |
| b19+2OH             | 1            | 954.0027               | 954.0020                | -0.0007         | -0.7             |
| b20+2OH             | 2            | 1018.5240              | 1018.5233               | -0.0014         | -0.7             |
| b22+2OH             | 2            | 1095.5611              | 1095.5616               | 0.0010          | 0.5              |
| [M+2H]+2OH          | 2            | 1226.6287              | 1226.6240               | -0.0094         | -3.8             |
| b15+2OH             | 1            | 1512.7401              | 1512.7317               | -0.0084         | -5.6             |

10\_18\_2011Collagen\_Chromtrypsin\_HCD #3285 RT: 25.63 AV: 1 NL: 1.30E5

T: FTMS + c NSI d Full ms2 1034.50@hcd30.00 [120.00-2000.00]

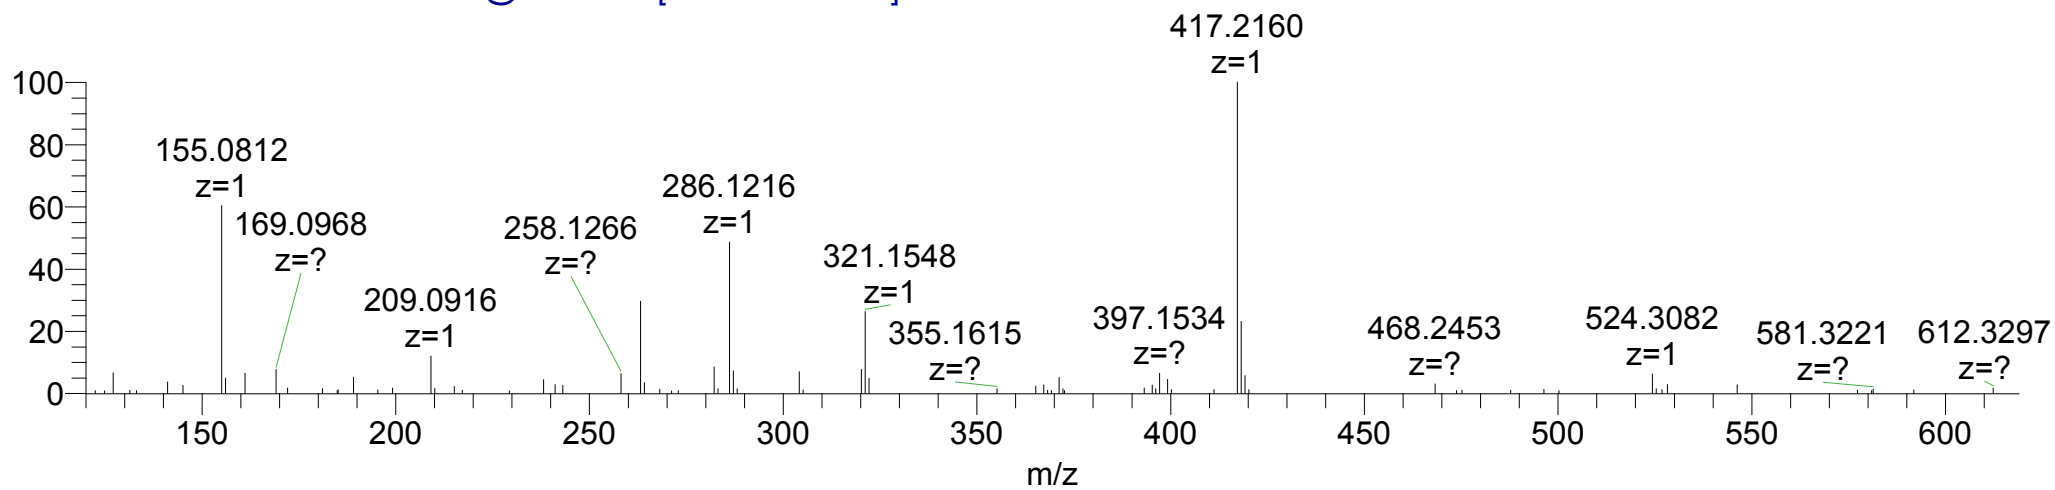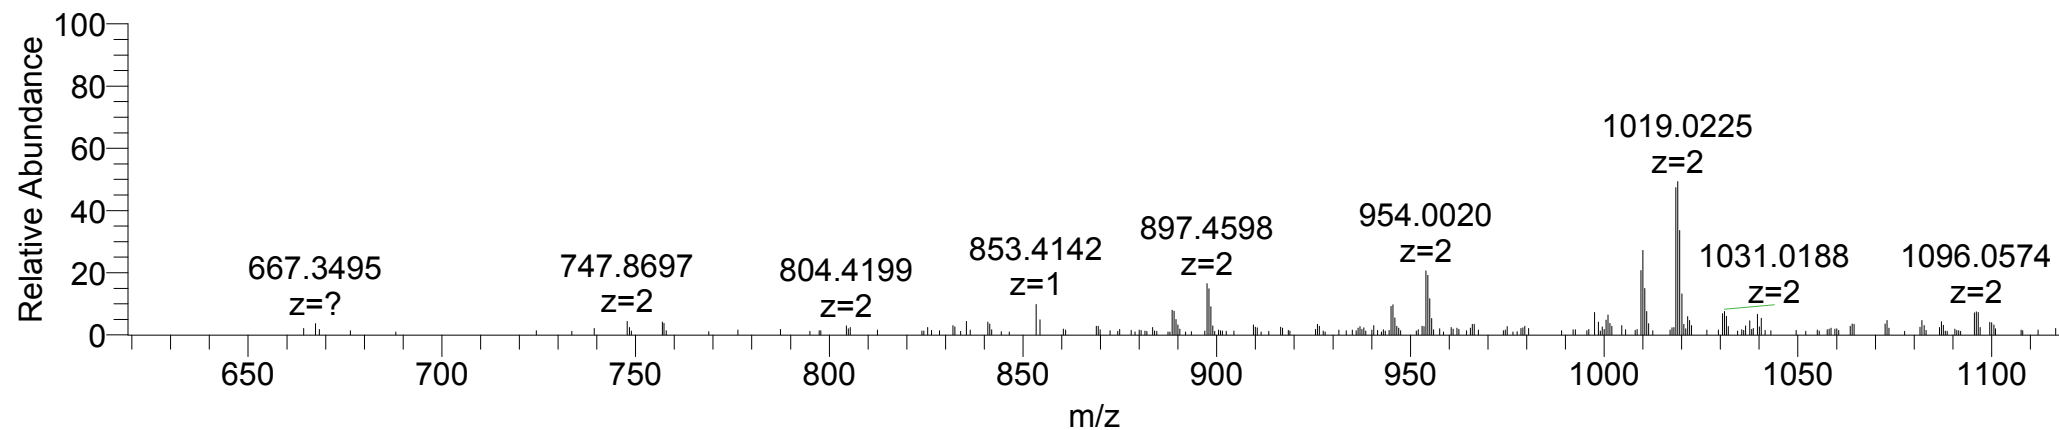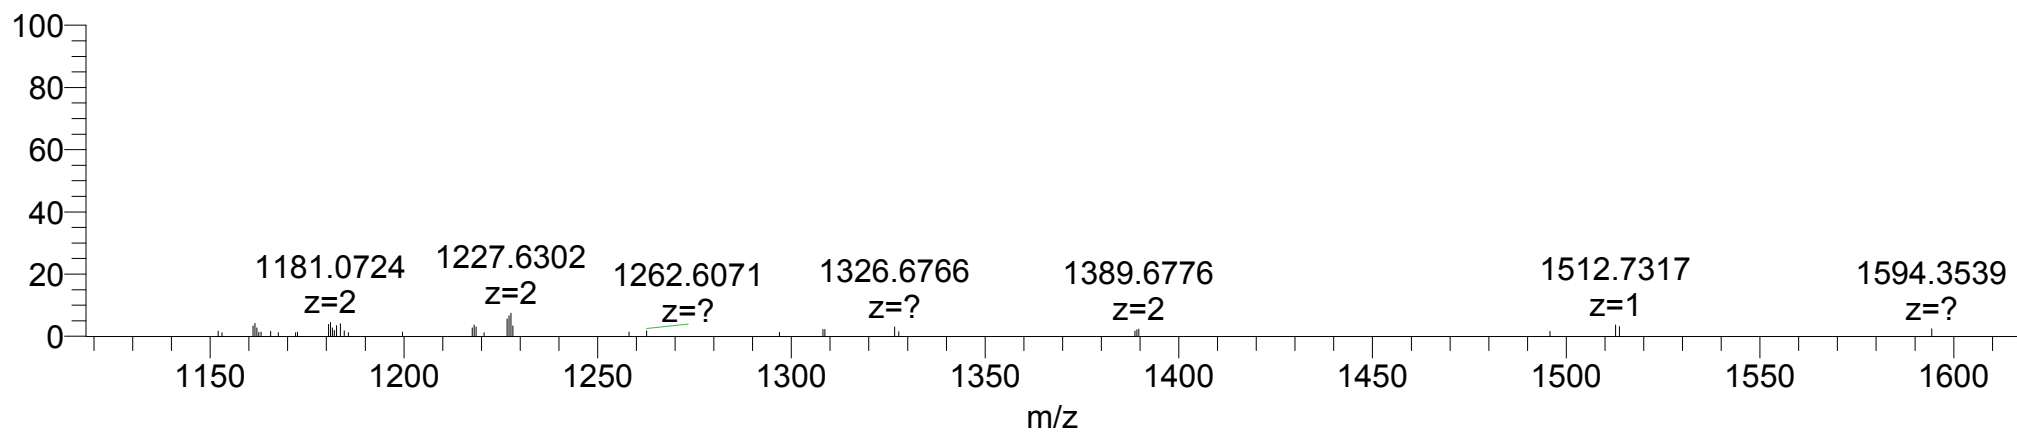

Human

3.

**P501-OH, P504-OH, P507-OH, P513-OH, P515-OH, P516-OH**

#499-525: GPPPGRPGLPGADGLPGPPGTMLMLPFR

MS<sup>2</sup>: GPPPGRPGLPGADGLPGPPGTMLMLPFR

| Ion                        | charge state | Theoretical m/z (mono) | Experimental m/z (mono) | Mass error (Da) | Mass error (PPM) |
|----------------------------|--------------|------------------------|-------------------------|-----------------|------------------|
| [M+3H]+6OH                 | 3            | 917.7913               | 917.7928                | 0.0045          | 1.6              |
| y3                         | 1            | 419.2401               | 419.2401                | 0.0000          | 0.0              |
| y11+2OH                    | 2            | 646.3305               | 646.3314                | 0.0018          | 1.4              |
| y13+3OH (MS <sup>3</sup> ) | 3            | 731.3651               | 731.3670                | 0.0057          | 2.6              |
| b8+2OH                     | 1            | 764.4050               | 764.4072                | 0.0022          | 2.9              |
| y19+4OH                    | 2            | 994.4844               | 994.4891                | 0.0094          | 4.7              |
| b24+6OH                    | 2            | 1167.0669              | 1167.0731               | 0.0124          | 5.3              |
| y11+2OH                    | 1            | 1290.6437              | 1290.6490               | 0.0053          | 4.1              |
| y25+6OH                    | 2            | 1299.1462              | 1299.1527               | 0.0130          | 5.0              |
| y12+2OH                    | 1            | 1348.6752              | 1348.6769               | 0.0017          | 1.3              |
| y13+3OH                    | 1            | 1461.7229              | 1461.7268               | 0.0039          | 2.7              |
| y15+3OH                    | 1            | 1631.8284              | 1631.8324               | 0.0040          | 2.5              |

MS<sup>3</sup>: PGPPPGTMLMLPFR

| Ion           | charge state | Theoretical m/z (mono) | Experimental m/z (mono) | Mass error (Da) | Mass error (PPM) |
|---------------|--------------|------------------------|-------------------------|-----------------|------------------|
| b2/PG+OH      | 1            | 171.0764               | 171.0762                | -0.0002         | -1.2             |
| b3+OH/GPP+2OH | 1            | 284.1241               | 284.1239                | -0.0002         | -0.7             |
| y3            | 1            | 419.2401               | 419.2398                | -0.0003         | -0.7             |
| y4            | 1            | 532.3242               | 532.3230                | -0.0012         | -2.3             |
| y10+2OH       | 2            | 589.8067               | 589.8045                | -0.0044         | -3.7             |
| y11+2OH       | 2            | 646.3305               | 646.3298                | -0.0014         | -1.1             |
| y5+OH         | 1            | 663.3647               | 663.3640                | -0.0007         | -1.1             |
| y6            | 1            | 776.4487               | 776.4471                | -0.0016         | -2.1             |
| y7            | 1            | 907.4892               | 907.4882                | -0.0010         | -1.1             |
| y9            | 1            | 1065.5584              | 1065.5621               | 0.0037          | 3.5              |
| y10+OH        | 1            | 1178.6060              | 1178.6029               | -0.0031         | -2.6             |
| y11+2OH       | 1            | 1291.6537              | 1291.6549               | 0.0012          | 0.9              |

10\_7\_2011Collagen\_Trypsin\_MS3\_CIDandHCD #5480 RT: 46.89 AV: 1 NL: 1.04E5

T: FTMS + c NSI d Full ms2 918.13@cid35.00 [240.00-2000.00]

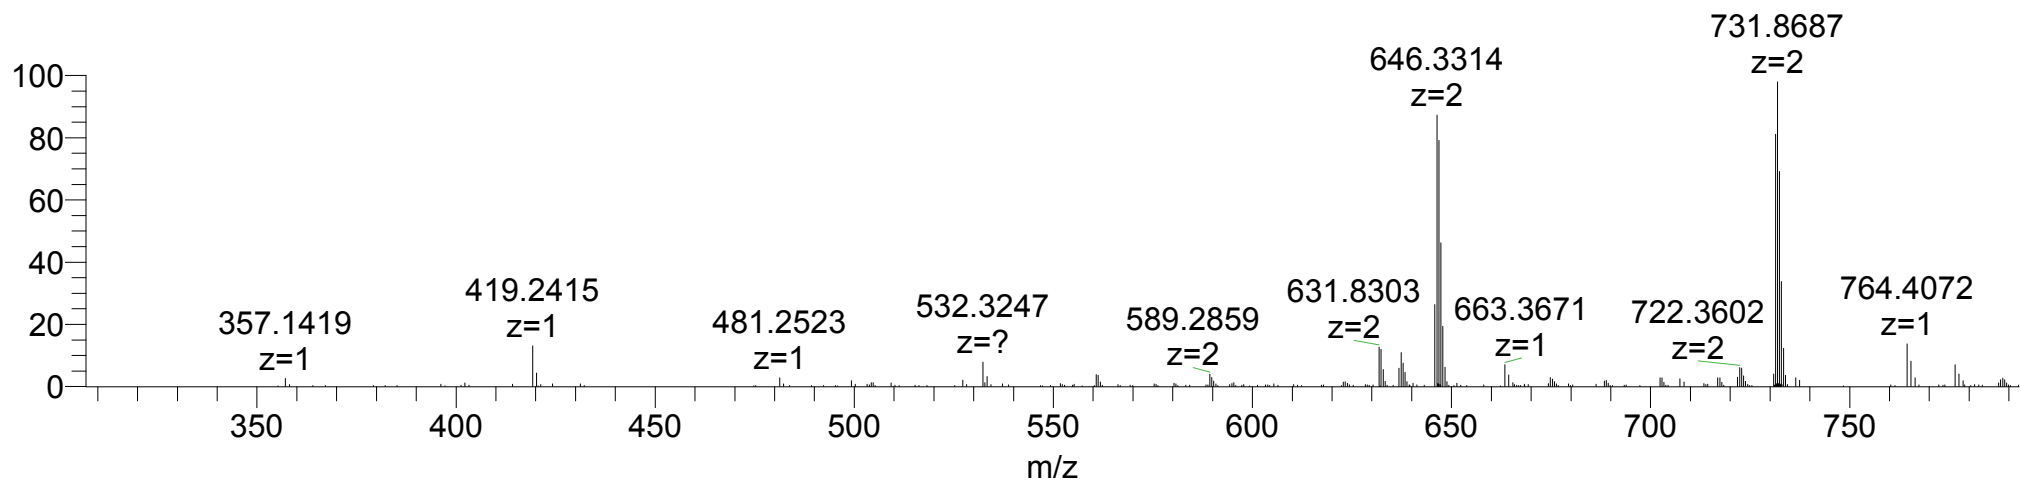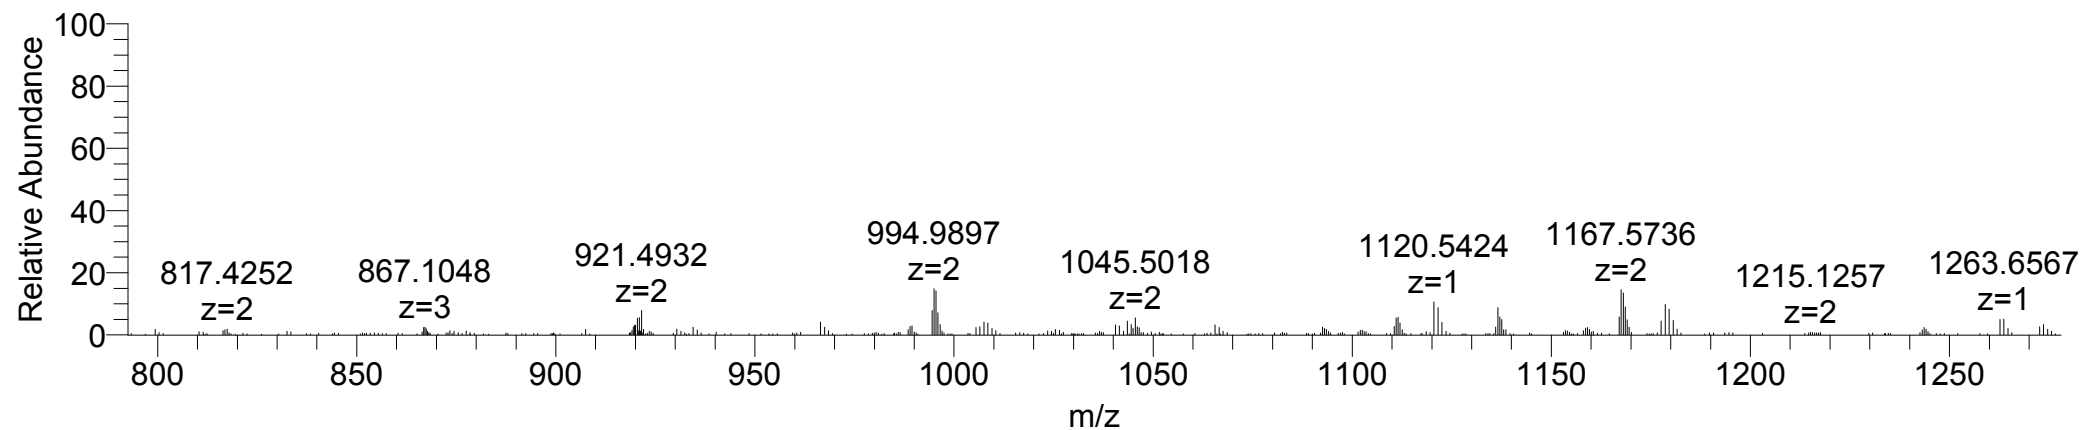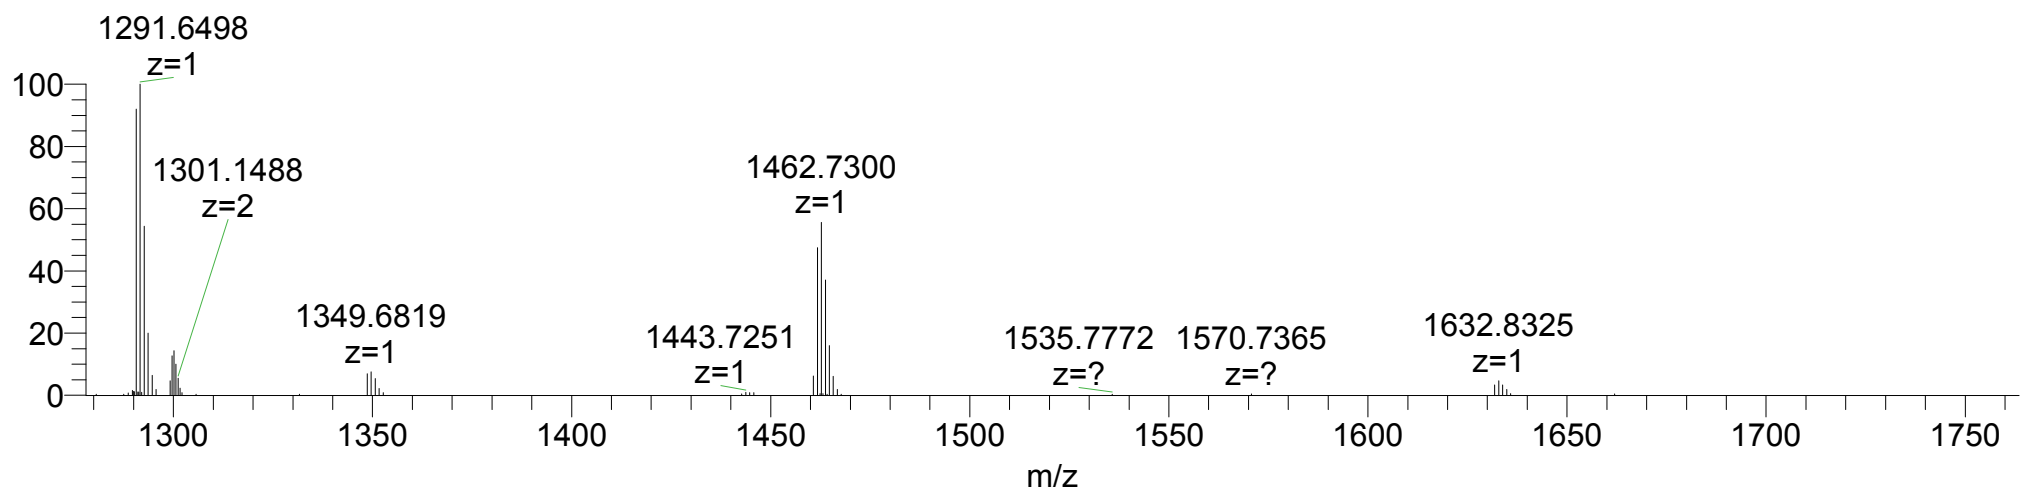

10\_7\_2011Collagen\_Trypsin\_MS3\_CIDandHCD #5481 RT: 46.90 AV: 1 NL: 8.68E4

T: FTMS + c NSI d Full ms3 918.13@cid35.00 731.87@hcd30.00 [110.00-1475.00]

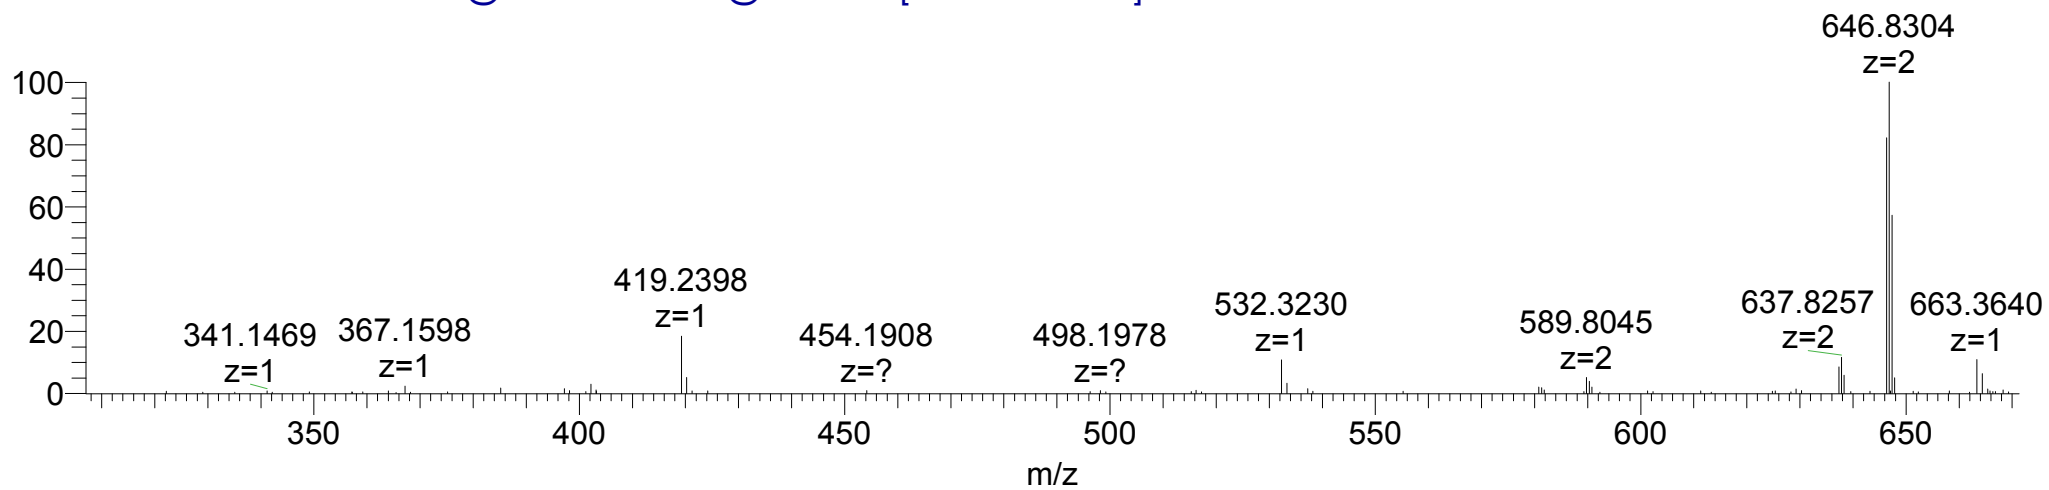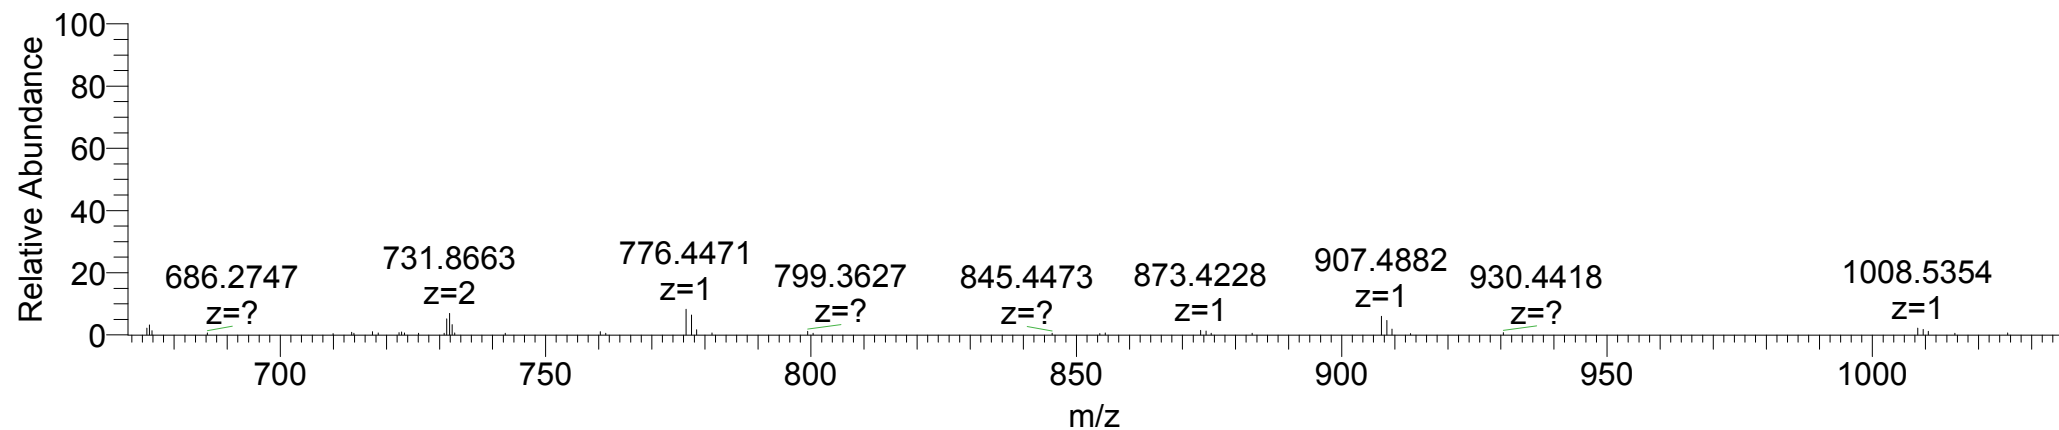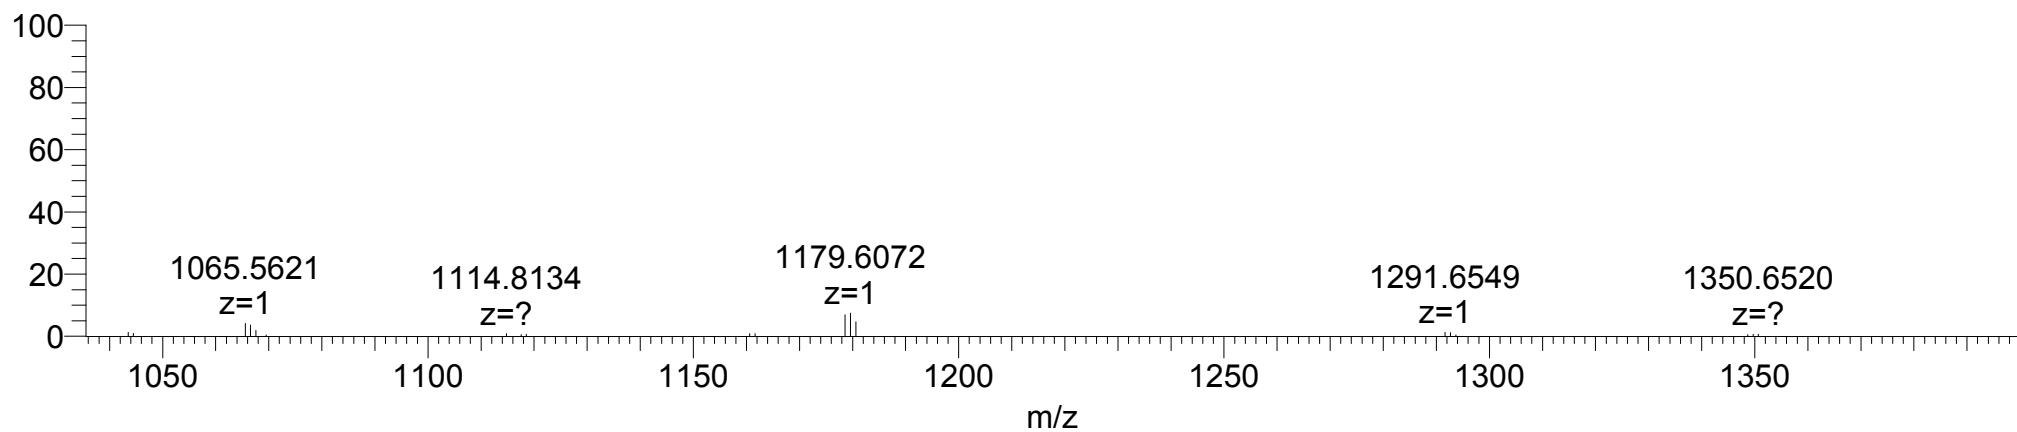



Human

4.

**K535-OH**

#526-554: FGGGGDAGSKGPMVSAQESQAQAILQQAR

| Ion       | charge state | Theoretical m/z (mono) | Experimental m/z (mono) | Mass error (Da) | Mass error (PPM) |
|-----------|--------------|------------------------|-------------------------|-----------------|------------------|
| [M+3H]+OH | 3            | 954.7981               | 954.7964                | -0.0051         | -1.8             |
| y4        | 1            | 502.2732               | 502.2738                | 0.0006          | 1.2              |
| y5        | 1            | 615.3573               | 615.3586                | 0.0013          | 2.1              |
| y6        | 1            | 728.4413               | 728.4408                | -0.0005         | -0.7             |
| y7        | 1            | 799.4785               | 799.4763                | -0.0022         | -2.8             |
| b18+OH    | 2            | 825.3648               | 825.3606                | -0.0084         | -5.1             |
| b10+OH    | 1            | 850.3690               | 850.3683                | -0.0007         | -0.8             |
| y8        | 1            | 927.5370               | 927.5385                | 0.0015          | 1.6              |
| y9        | 1            | 998.5742               | 998.5795                | 0.0053          | 5.3              |
| b22+OH    | 2            | 1032.4580              | 1032.4568               | -0.0024         | -1.2             |
| b23+OH    | 2            | 1067.9765              | 1067.9731               | -0.0068         | -3.2             |
| b24+OH    | 2            | 1124.5186              | 1124.5168               | -0.0036         | -1.6             |
| b25+OH    | 2            | 1181.0606              | 1181.0649               | 0.0086          | 3.6              |
| y11       | 1            | 1213.6648              | 1213.6641               | -0.0007         | -0.6             |
| b26+OH    | 2            | 1245.0899              | 1245.0878               | -0.0042         | -1.7             |
| b27+OH    | 2            | 1309.1192              | 1309.1256               | 0.0128          | 4.9              |
| b28+OH    | 2            | 1344.6377              | 1344.6343               | -0.0068         | -2.5             |

11\_9\_2011Col5a1\_Trypsin\_MS3\_CIDandHCD\_micro4 #4879 RT: 63.94 AV: 1 NL: 5.05E6

T: FTMS + c NSI d Full ms2 955.13@cid35.00 [250.00-2000.00]

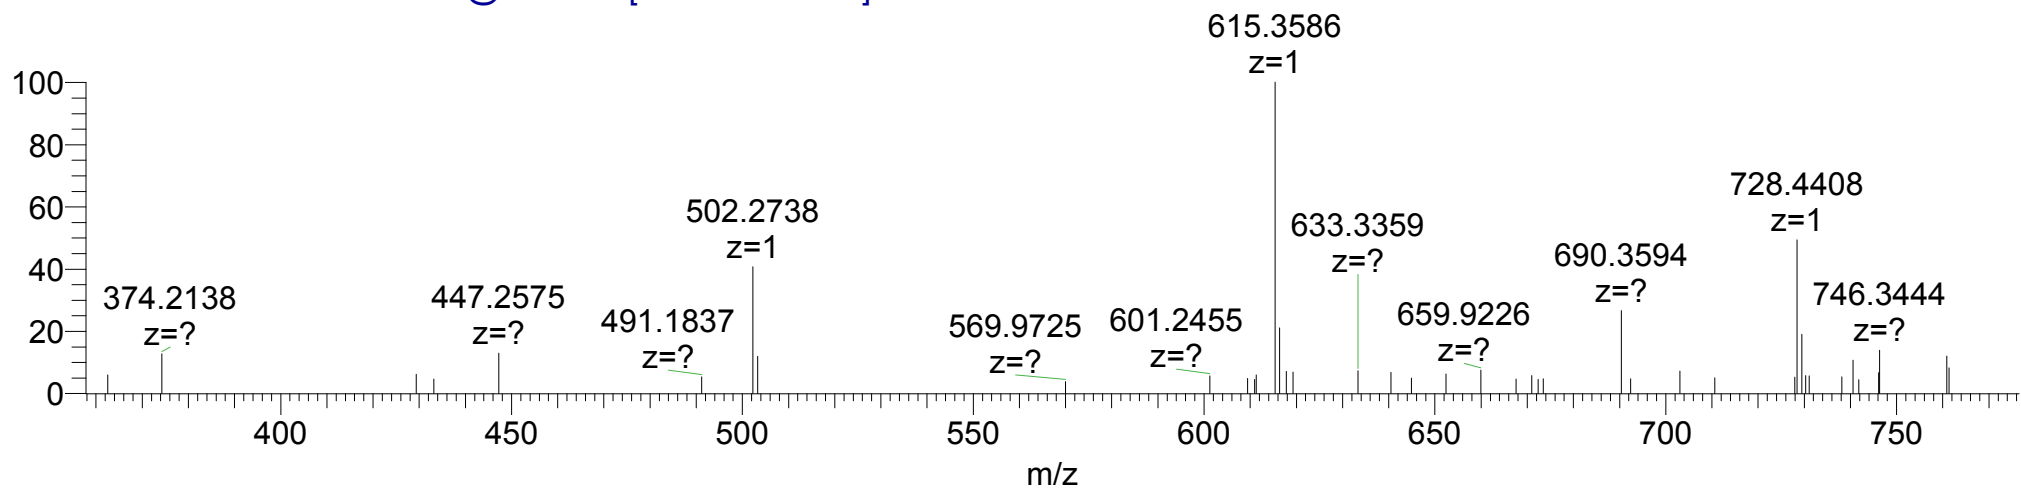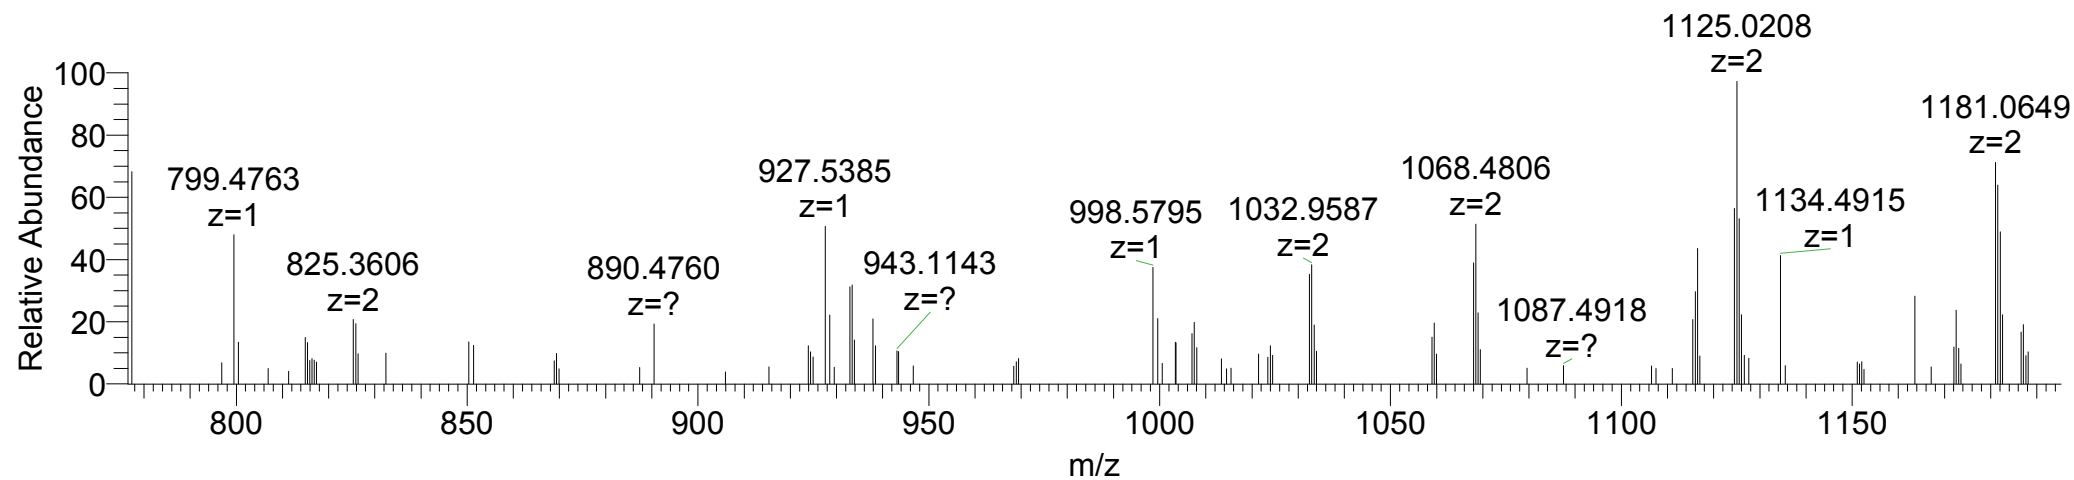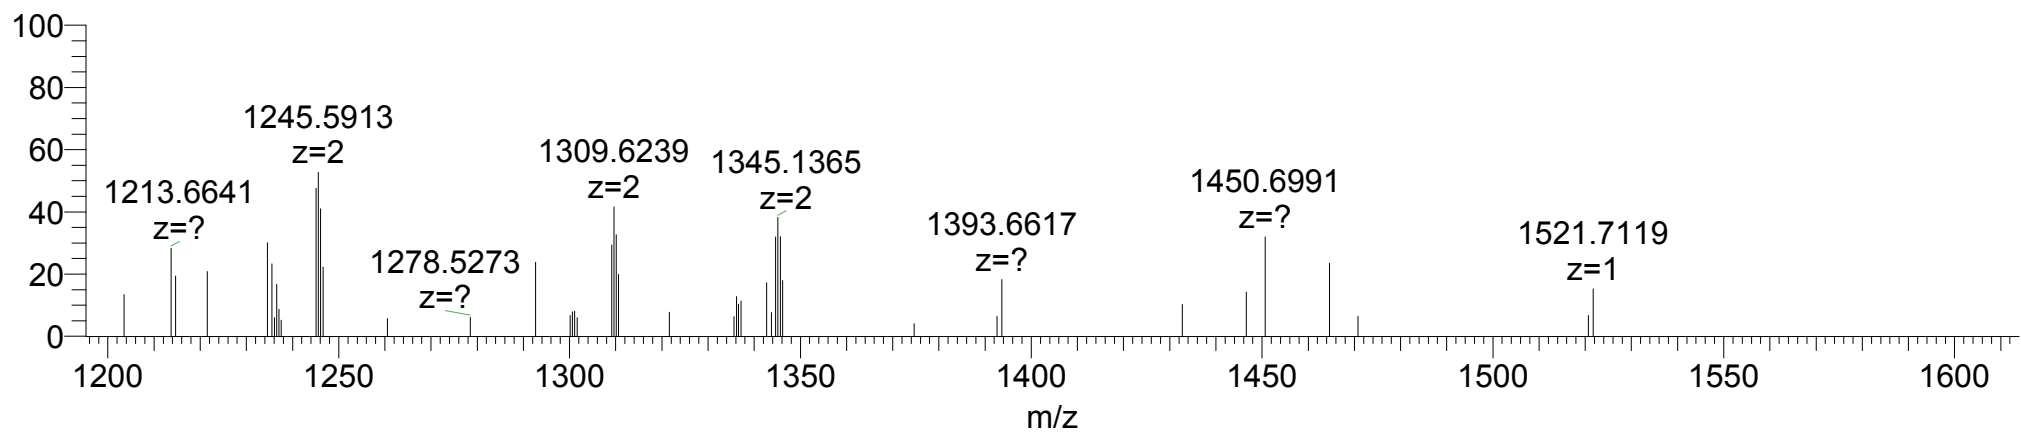

Human

5.

**P570-OH, P575-OH, P576-OH**

#567-581: TGRPGPVGPPGSGGL

| Ion             | charge state | Theoretical m/z (mono) | Experimental m/z (mono) | Mass error (Da) | Mass error (PPM) |
|-----------------|--------------|------------------------|-------------------------|-----------------|------------------|
| [M+2H]+3OH      | 2            | 677.3415               | 677.3419                | 0.0008          | 0.6              |
| PG-28+OH        | 1            | 143.0815               | 143.0817                | 0.0002          | 1.4              |
| y2              | 1            | 189.1234               | 189.1235                | 0.0001          | 0.5              |
| b3              | 1            | 315.1775               | 315.1776                | 0.0001          | 0.3              |
| y6+OH           | 1            | 503.2460               | 503.2484                | 0.0024          | 4.8              |
| GPPGSGG-H2O+2OH | 1            | 524.2100               | 524.2101                | 0.0001          | 0.2              |
| b12+3OH         | 2            | 554.7727               | 554.7731                | 0.0008          | 0.7              |
| y7+2OH          | 1            | 616.2937               | 616.2939                | 0.0002          | 0.3              |
| a7+OH           | 1            | 653.3729               | 653.3738                | 0.0009          | 1.4              |
| y8+2OH          | 1            | 673.3151               | 673.3154                | 0.0003          | 0.4              |
| b7+OH           | 1            | 681.3678               | 681.3686                | 0.0008          | 1.2              |
| a8+OH           | 1            | 710.3944               | 710.3950                | 0.0006          | 0.8              |
| b8+OH           | 1            | 738.3893               | 738.3898                | 0.0005          | 0.7              |
| b9+2OH          | 1            | 851.4370               | 851.4391                | 0.0021          | 2.5              |
| y10+2OH         | 1            | 869.4363               | 869.4376                | 0.0013          | 1.5              |
| a11+3OH         | 1            | 993.5112               | 993.5120                | 0.0008          | 0.8              |
| b11+3OH         | 1            | 1021.5061              | 1021.5068               | 0.0007          | 0.7              |
| y12+3OH         | 1            | 1039.5055              | 1039.5074               | 0.0019          | 1.8              |
| b12+3OH         | 1            | 1108.5382              | 1108.5388               | 0.0006          | 0.5              |
| b13+3OH         | 1            | 1165.5596              | 1165.5630               | 0.0034          | 2.9              |
| b14+3OH         | 1            | 1222.5811              | 1222.5826               | 0.0015          | 1.2              |

10\_18\_2011Collagen\_Chromtrypsin\_HCD #1383 RT: 12.03 AV: 1 NL: 2.46E5

T: FTMS + c NSI d Full ms2 677.34@hcd30.00 [120.00-1365.00]

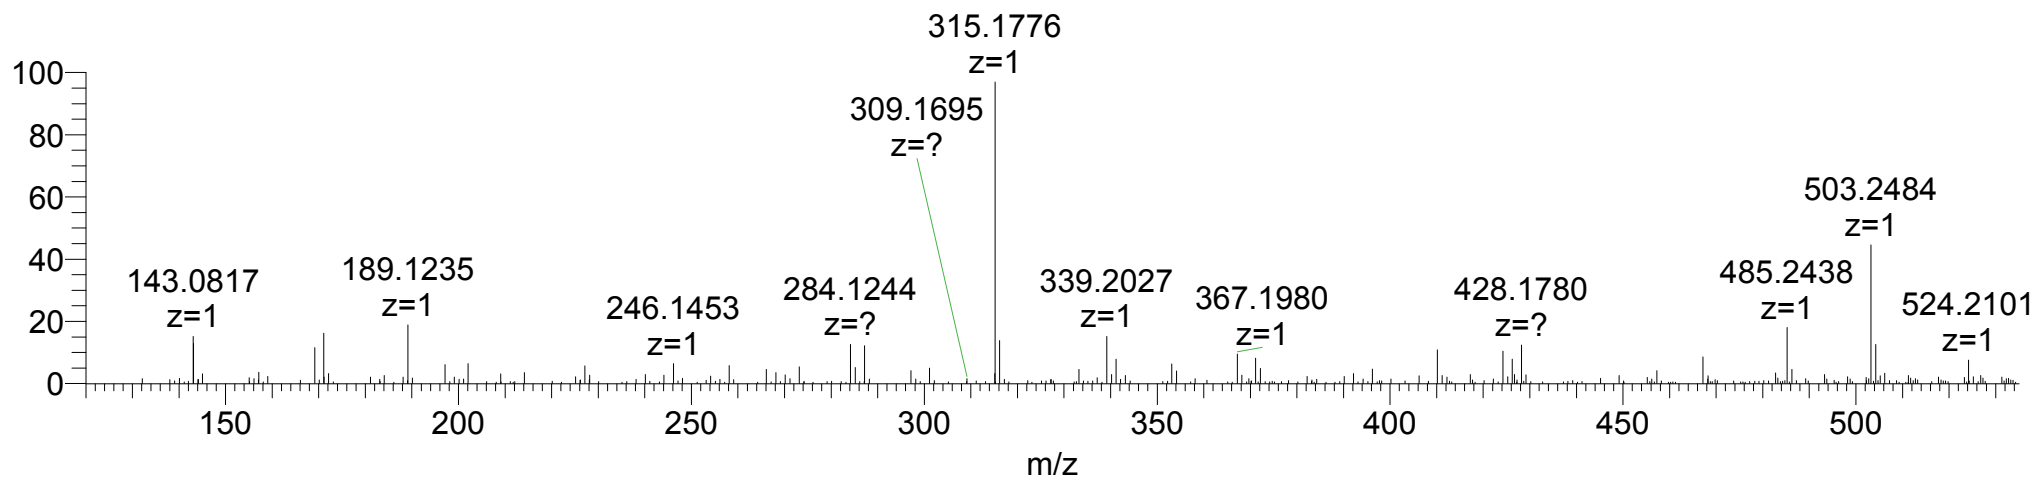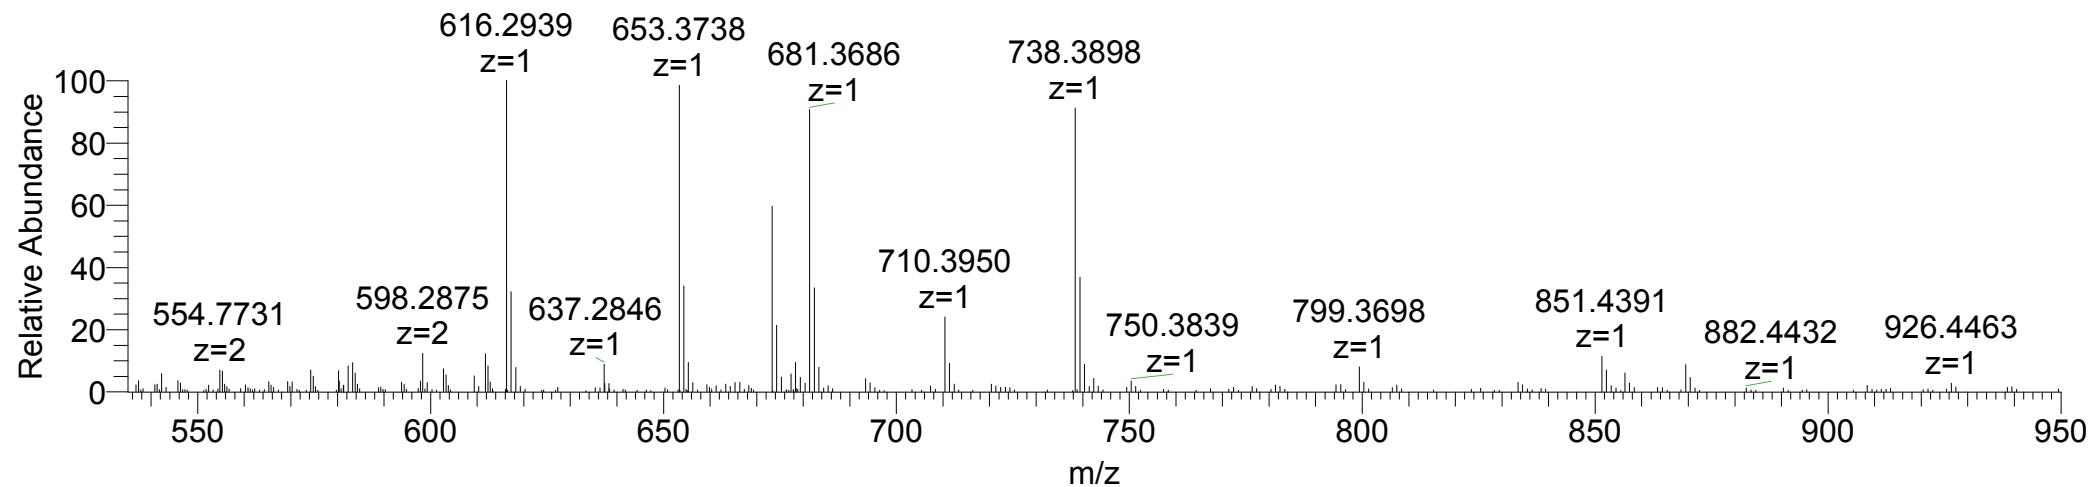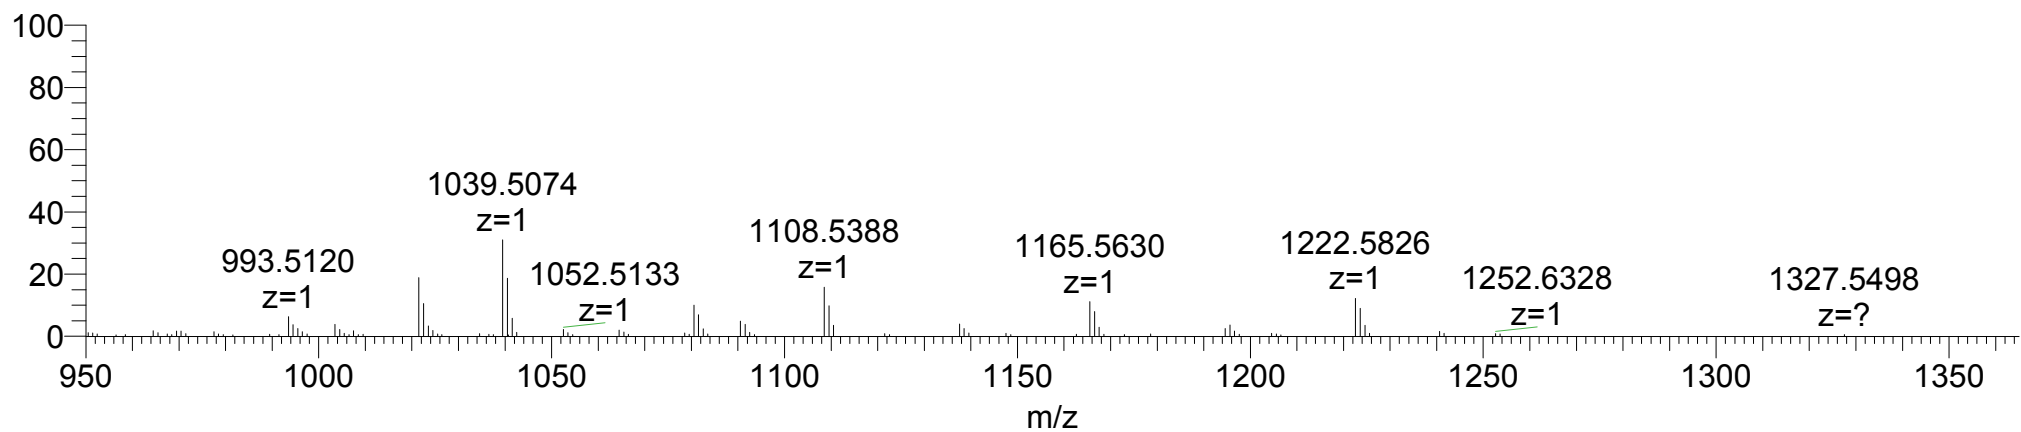

Human

6.

**P576-OH, K582-OH.Gal.Glc, P585-OH**

#555-594: LALRGPAGPMGLTGRPGPVGPPGSGGLKGEPGDVGPQGPR

| Ion                | charge state | Theoretical m/z (mono) | Experimental m/z (mono) | Mass error (Da) | Mass error (PPM) |
|--------------------|--------------|------------------------|-------------------------|-----------------|------------------|
| [M+5H]+4OH+Gal.Glc | 5            | 821.2160               | 821.2167                | 0.0035          | 0.9              |
| b9                 | 2            | 417.2532               | 417.2531                | -0.0002         | -0.2             |
| y10+OH             | 2            | 498.2489               | 498.2479                | -0.0020         | -2.0             |
| b11                | 2            | 511.2842               | 511.2849                | 0.0014          | 1.4              |
| y5/TGRPGP-28+OH    | 1            | 554.3045               | 554.3026                | -0.0019         | -3.4             |
| y6                 | 1            | 611.3260               | 611.3249                | -0.0011         | -1.8             |
| b7                 | 1            | 679.4250               | 679.4244                | -0.0006         | -0.9             |
| y7                 | 1            | 710.3944               | 710.3932                | -0.0012         | -1.7             |
| b8                 | 1            | 736.4464               | 736.4460                | -0.0004         | -0.5             |
| y28+4OH            | 3            | 882.1073               | 882.1072                | -0.0003         | -0.1             |
| a19+OH             | 2            | 894.0091               | 894.0094                | 0.0006          | 0.3              |
| y19+OH             | 2            | 905.4399               | 905.4405                | 0.0012          | 0.7              |
| b19+OH             | 2            | 908.0065               | 908.0052                | -0.0026         | -1.4             |
| b20+OH             | 2            | 936.5173               | 936.5183                | 0.0020          | 1.1              |
| y30+4OH            | 3            | 938.8092               | 938.8063                | -0.0087         | -3.1             |
| y20+3OH            | 2            | 953.9663               | 953.9629                | -0.0068         | -3.6             |
| y10+OH             | 1            | 995.4905               | 995.4893                | -0.0012         | -1.2             |
| b11/ALRGPMGL       | 1            | 1021.5611              | 1021.5617               | 0.0006          | 0.6              |
| y11+OH             | 1            | 1124.5331              | 1124.5269               | -0.0062         | -5.5             |
| y12+OH             | 1            | 1181.5545              | 1181.5554               | 0.0009          | 0.8              |

\*Unlocalized sites: P570-OH?, P572-OH?

Pseudolocalized sites: P570-OH

10\_7\_2011Collagen\_Trypsin\_HCDandETD\_111009033323 #4763 RT: 31.93 AV: 1 NL: 5.55E6

T: FTMS + c NSI d Full ms2 821.62@hcd35.00 [100.00-2000.00]

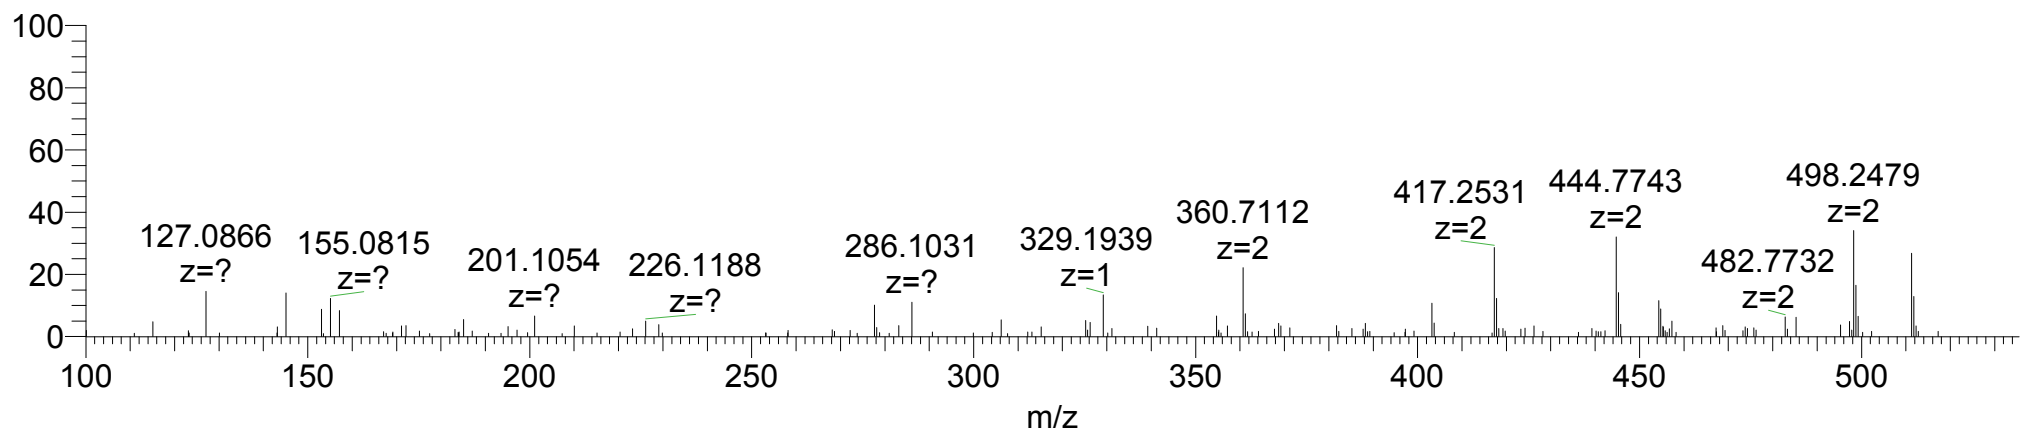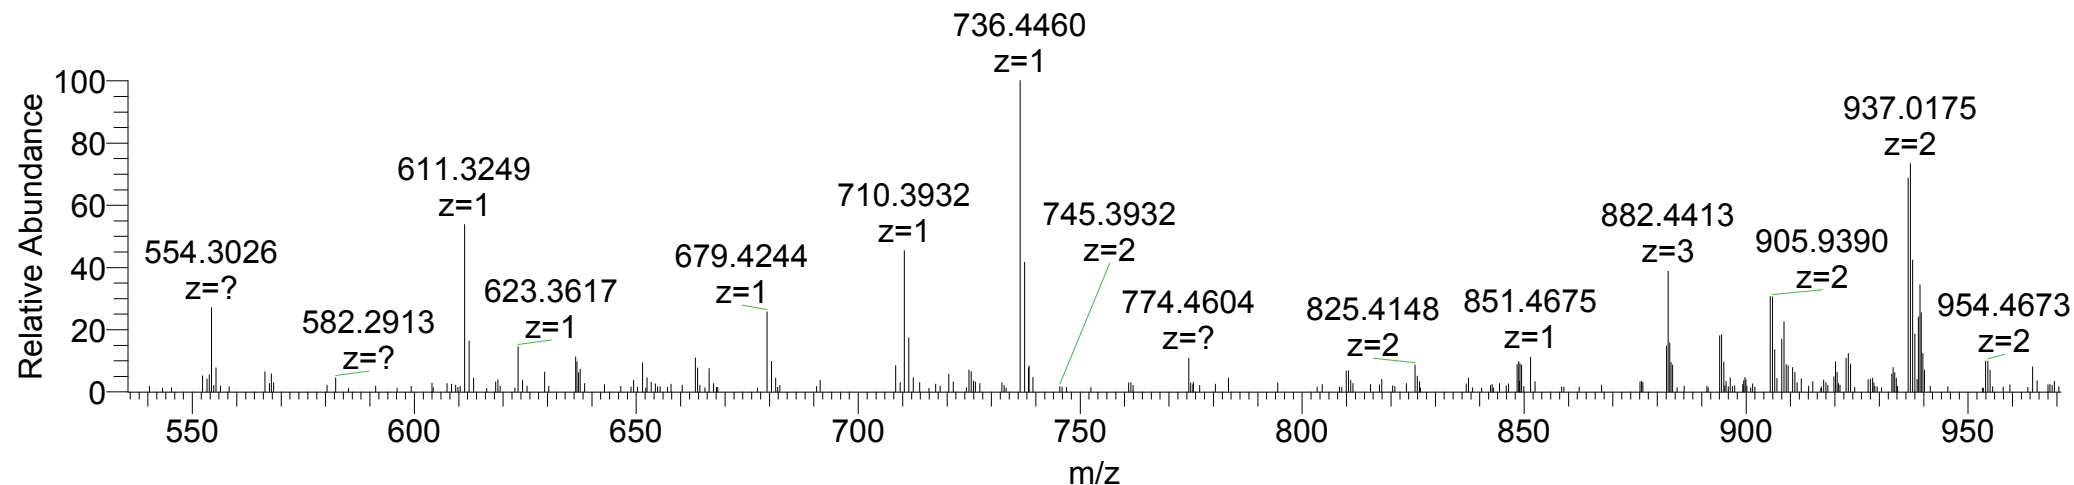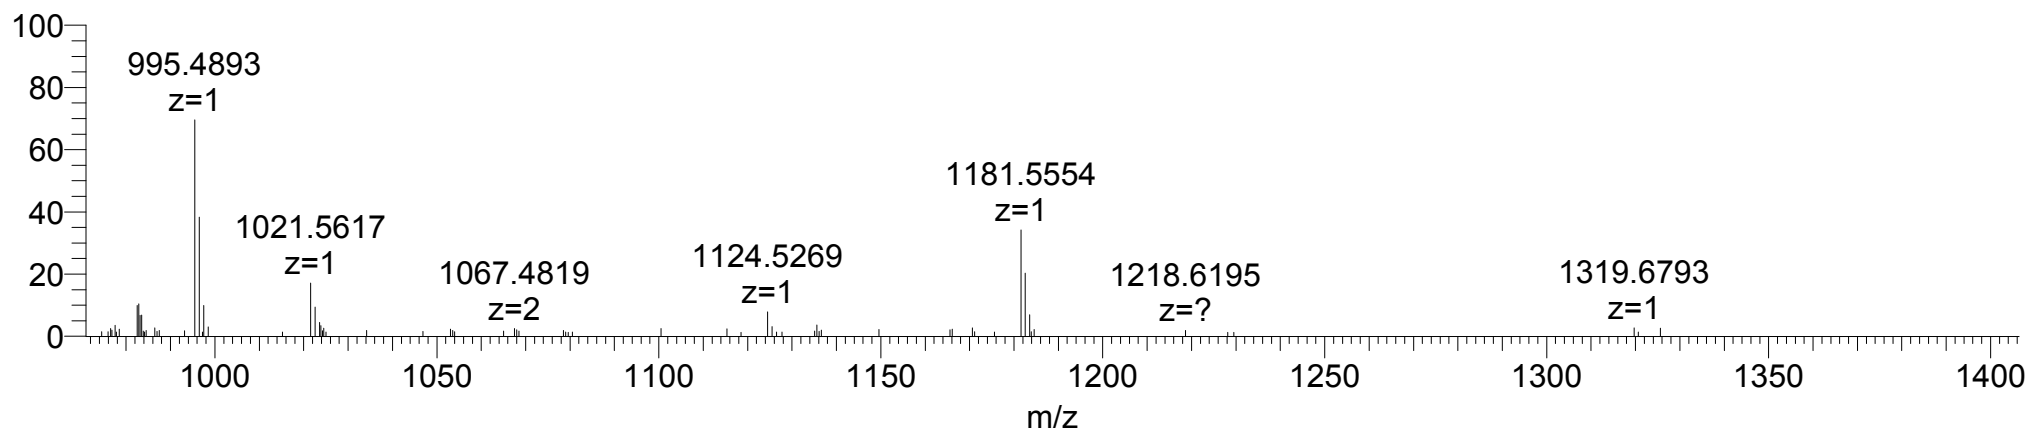

Human

7.

**P599-OH, P600-OH, P606-OH**

#595-608: GVQGPPPGPAGKPGR

MS<sup>2</sup>: GVQGPPPGPAGKPGR

| Ion                       | charge state | Theoretical m/z (mono) | Experimental m/z (mono) | Mass error (Da) | Mass error (PPM) |
|---------------------------|--------------|------------------------|-------------------------|-----------------|------------------|
| [M+3H]+3OH                | 3            | 441.5652               | 441.5652                | 0.0000          | 0.0              |
| b3/VQG                    | 1            | 285.1557               | 285.1555                | -0.0002         | -0.7             |
| b13+3OH                   | 3            | 383.5280               | 383.5315                | 0.0105          | 9.1              |
| y12+3OH(MS <sup>3</sup> ) | 3            | 389.5353               | 389.5349                | -0.0012         | -1.0             |
| y10+3OH                   | 1            | 491.2567               | 491.2589                | 0.0022          | 4.5              |
| y11+3OH                   | 1            | 519.7700               | 519.7697                | -0.0003         | -0.6             |
| y12+3OH                   | 1            | 583.7993               | 583.7992                | -0.0001         | -0.2             |

MS<sup>3</sup>: QGPPGPAGKPGR

| Ion        | charge state | Theoretical m/z (mono) | Experimental m/z (mono) | Mass error (Da) | Mass error (PPM) |
|------------|--------------|------------------------|-------------------------|-----------------|------------------|
| K          | 1            | 129.1022               | 129.1021                | -0.0001         | -0.8             |
| y10+3OH    | 3            | 327.8419               | 327.8415                | -0.0012         | -1.2             |
| y3         | 1            | 345.1881               | 345.1877                | -0.0004         | -1.2             |
| y7+OH      | 2            | 349.7008               | 349.7005                | -0.0006         | -0.9             |
| y8+OH      | 2            | 378.2116               | 378.2113                | -0.0006         | -0.8             |
| y9+2OH     | 2            | 434.7354               | 434.7343                | -0.0022         | -2.5             |
| y4         | 1            | 473.2831               | 473.2828                | -0.0003         | -0.6             |
| y10+3OH    | 2            | 491.2592               | 491.2589                | -0.0006         | -0.6             |
| GPPGPA+2OH | 1            | 509.2354               | 509.2339                | -0.0015         | -3.0             |
| y5+OH      | 1            | 530.3045               | 530.3033                | -0.0012         | -2.3             |
| y6+OH      | 1            | 601.3416               | 601.3408                | -0.0008         | -1.3             |
| y7+OH      | 1            | 698.3944               | 698.3996                | 0.0052          | 7.5              |

10\_7\_2011Collagen\_Trypsin\_MS3\_CIDandHCD #1096 RT: 12.14 AV: 1 NL: 5.91E4

T: FTMS + c NSI d Full ms2 441.57@cid35.00 [110.00-1335.00]

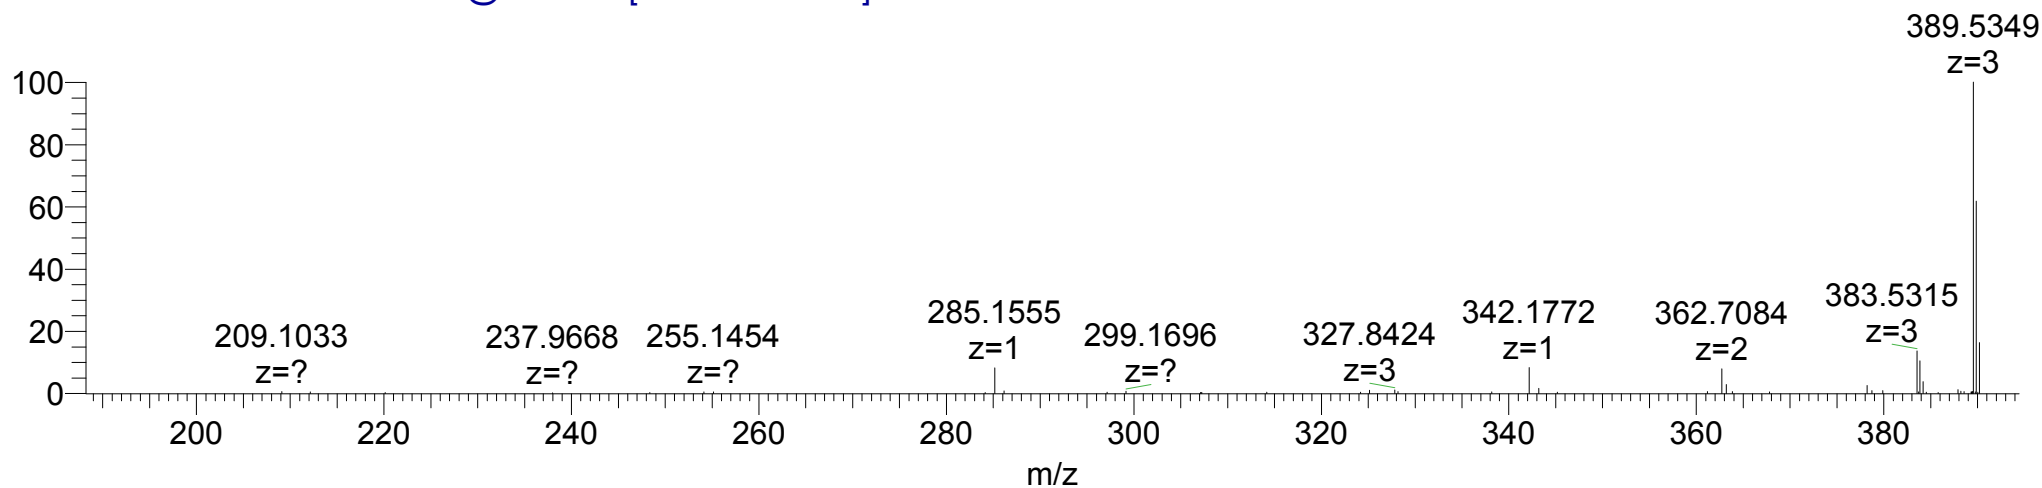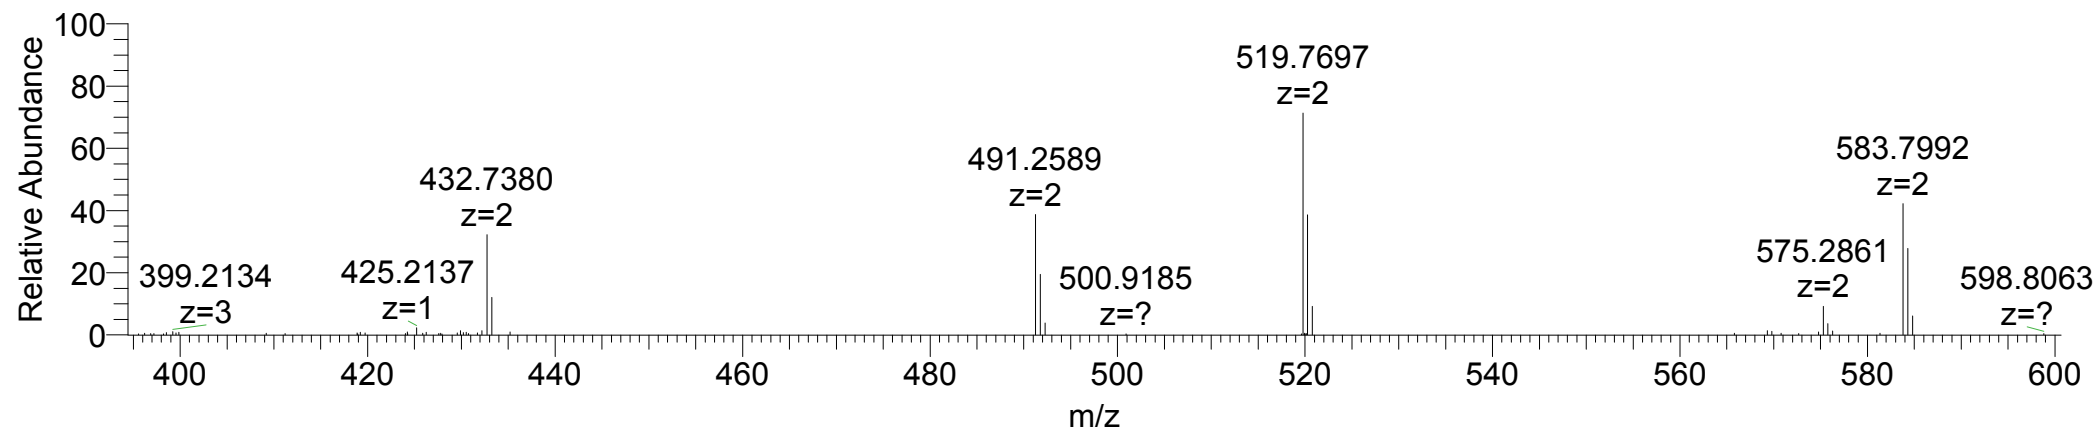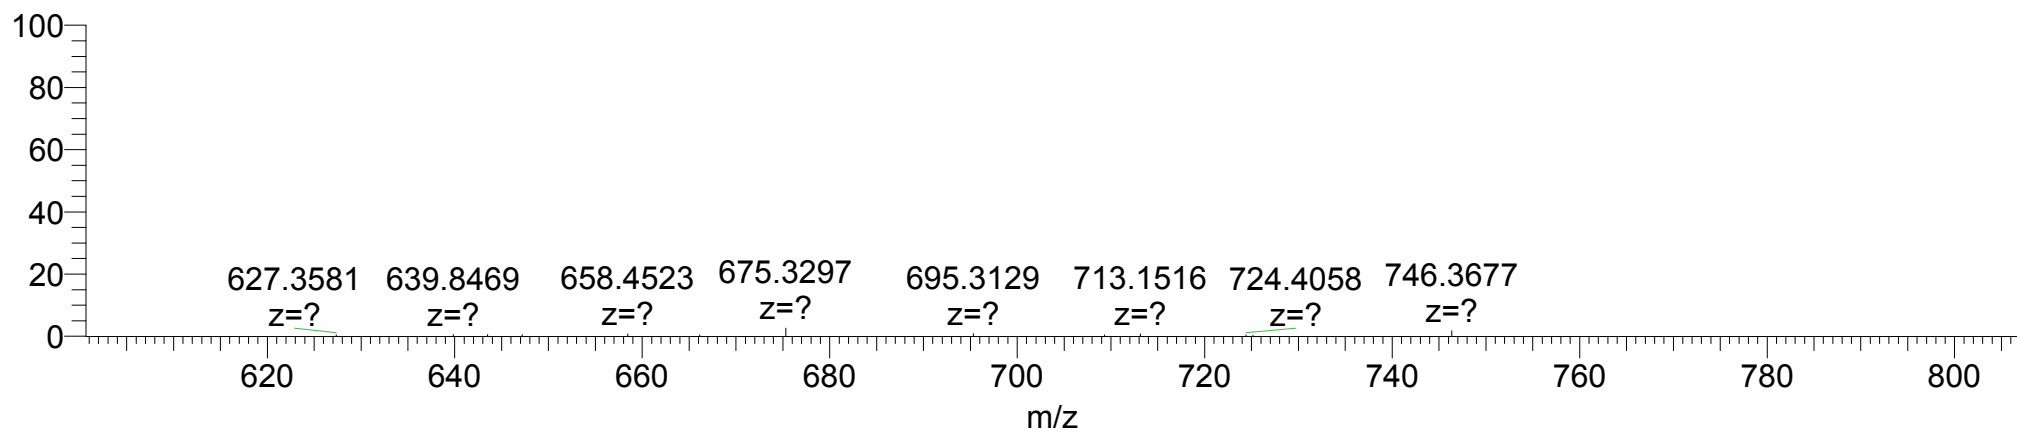



10\_7\_2011Collagen\_Trypsin\_MS3\_CIDandHCD #1097 RT: 12.15 AV: 1 NL: 9.64E3

T: FTMS + c NSI d Full ms3 441.57@cid35.00 389.53@hcd30.00 [110.00-1180.00]

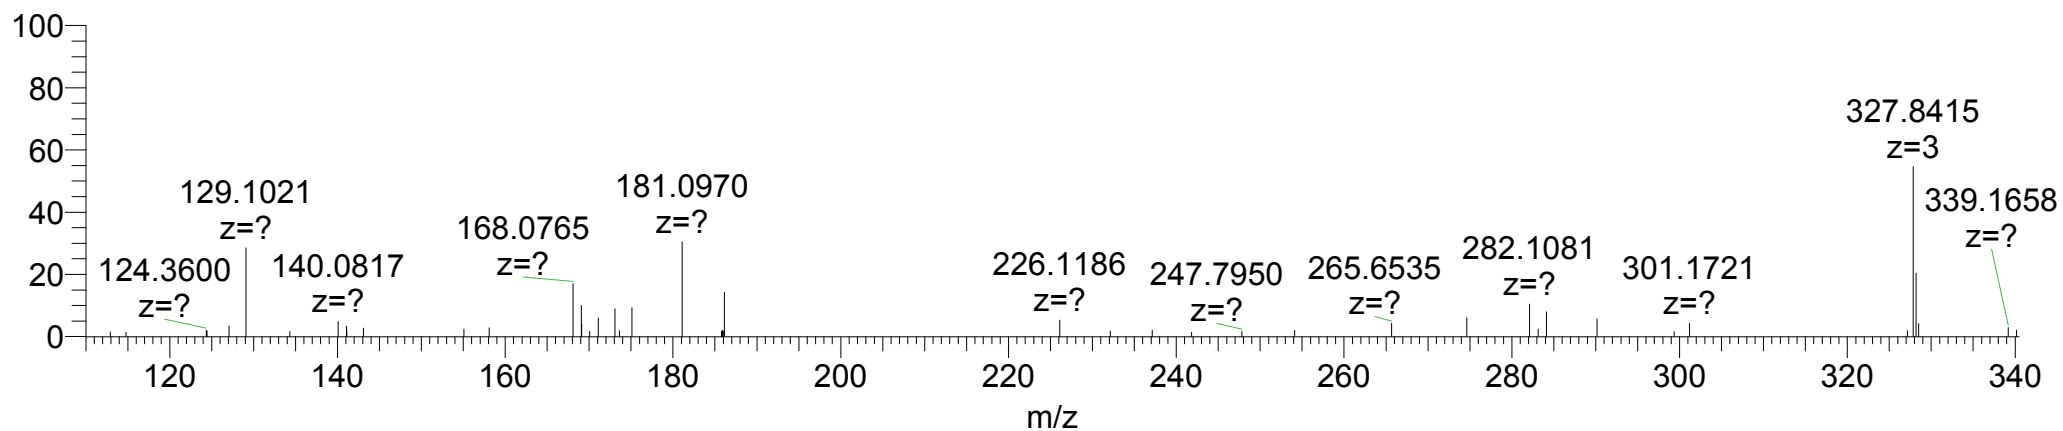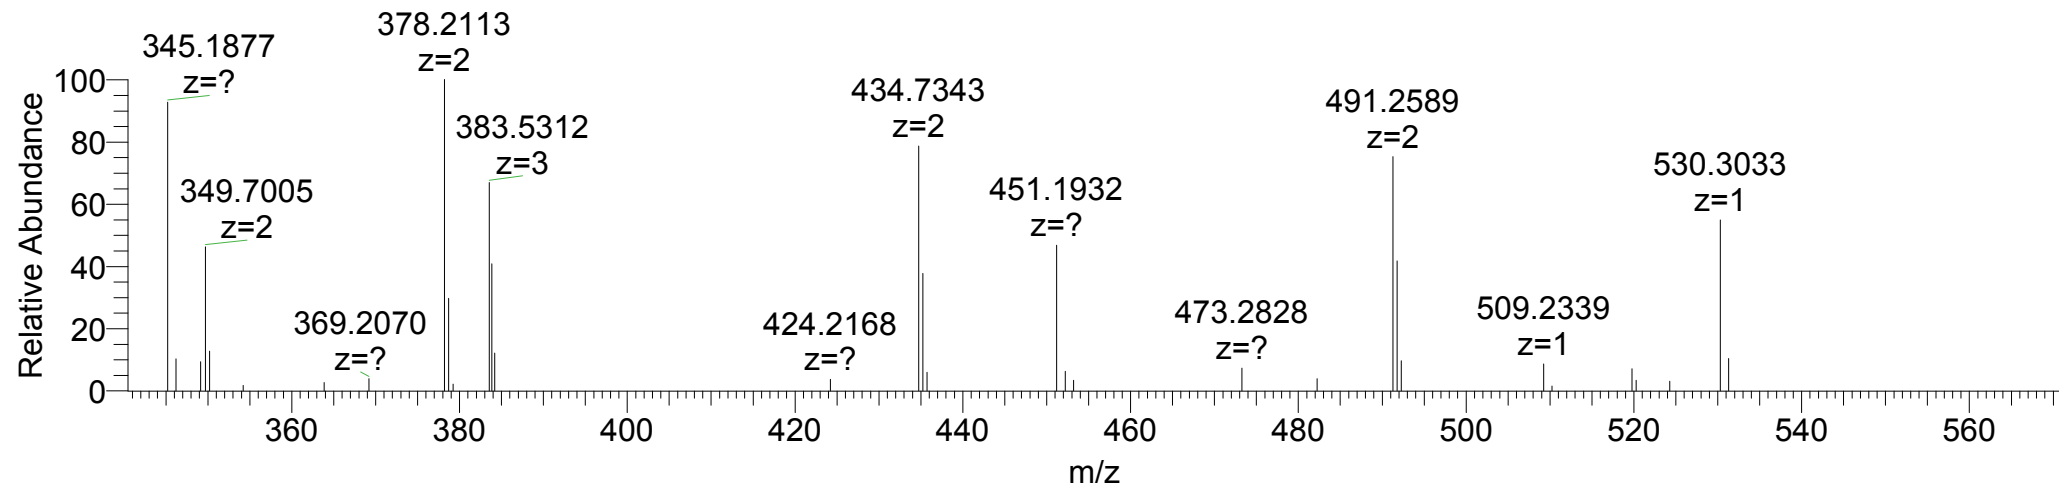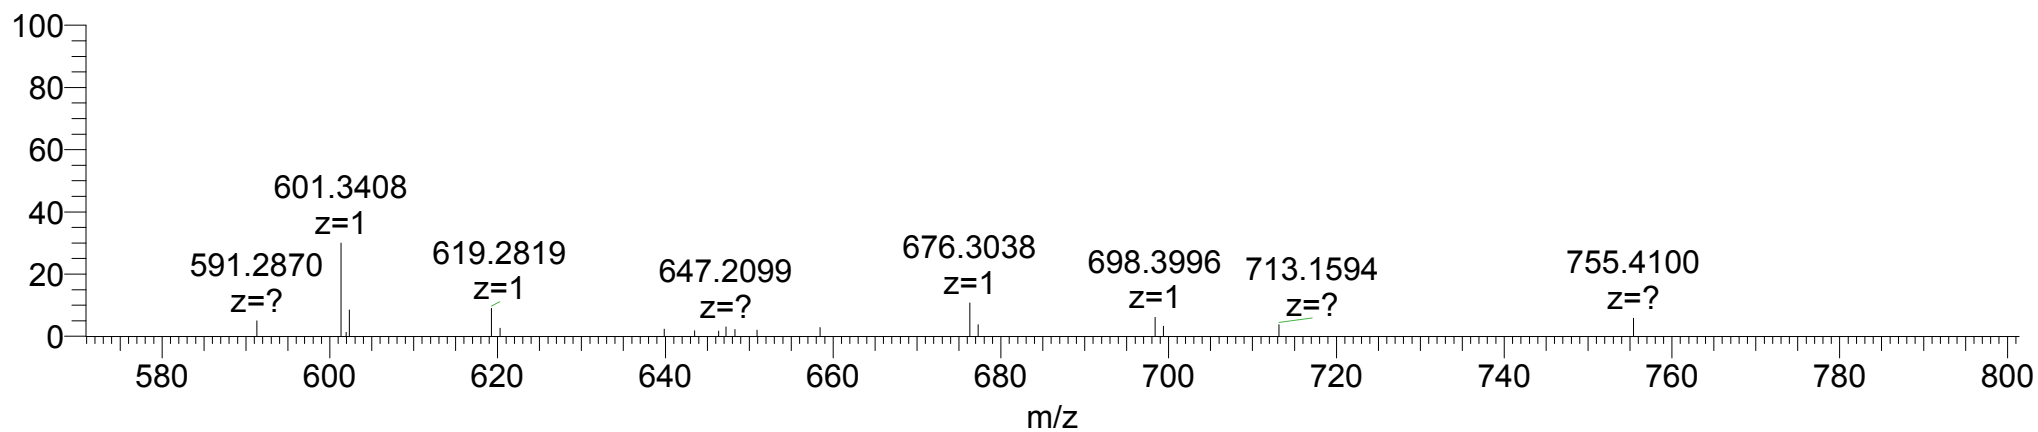

Human

8.

**P621-OH, K627-OH.Gal.Glc**

#619-630: GMPPGQTGPKKGDR

| Ion                   | charge state | Theoretical m/z (mono) | Experimental m/z (mono) | Mass error (Da) | Mass error (PPM) |
|-----------------------|--------------|------------------------|-------------------------|-----------------|------------------|
| [M+3H]+2OH+Gal.Glc    | 3            | 519.5630               | 519.5618                | -0.0036         | -2.3             |
| a2                    | 1            | 161.0743               | 161.0742                | -0.0001         | -0.6             |
| y1                    | 1            | 175.1190               | 175.1188                | -0.0002         | -1.1             |
| b2                    | 1            | 189.0692               | 189.0691                | -0.0001         | -0.5             |
| GKP-<br>H2O+OH/PGQ+OH | 1            | 299.1350               | 299.1348                | -0.0002         | -0.7             |
| y10+OH                | 3            | 348.8405               | 348.8400                | -0.0015         | -1.4             |
| y9+OH                 | 2            | 466.2332               | 466.2326                | -0.0012         | -1.3             |
| y10-H2O+2OH           | 2            | 513.7518               | 513.7514                | -0.0008         | -0.8             |
| y10+2OH               | 2            | 522.7571               | 522.7562                | -0.0018         | -1.7             |
| y5+OH                 | 1            | 588.3100               | 588.3104                | 0.0004          | 0.7              |
| y6+OH                 | 1            | 645.3315               | 645.3311                | -0.0004         | -0.6             |
| y7+OH                 | 1            | 746.3791               | 746.3781                | -0.0010         | -1.3             |
| y10+2OH               | 1            | 1044.5069              | 1044.5085               | 0.0016          | 1.5              |

11\_7\_2011Collagen\_nonDenatured #577 RT: 7.79 AV: 1 NL: 6.57E4

T: FTMS + c NSI d Full ms2 519.56@hcd35.00 [100.00-1570.00]

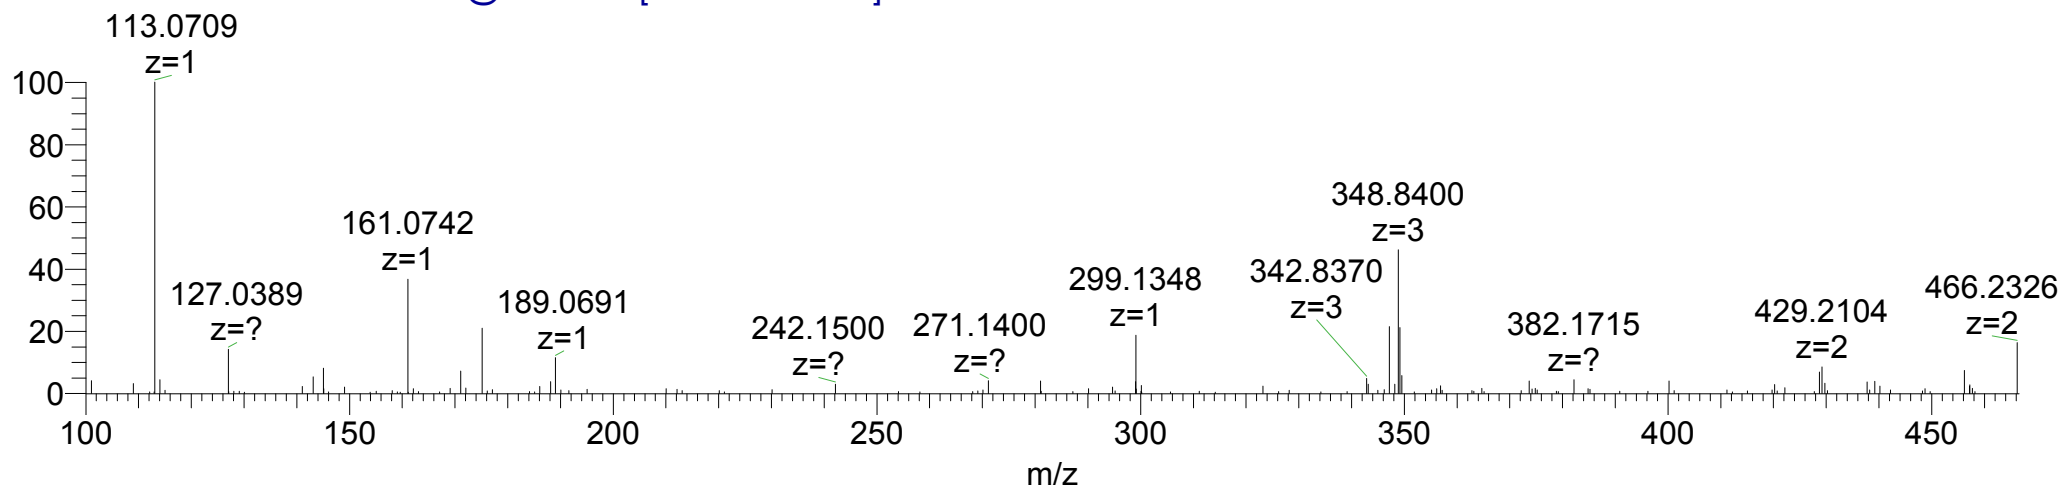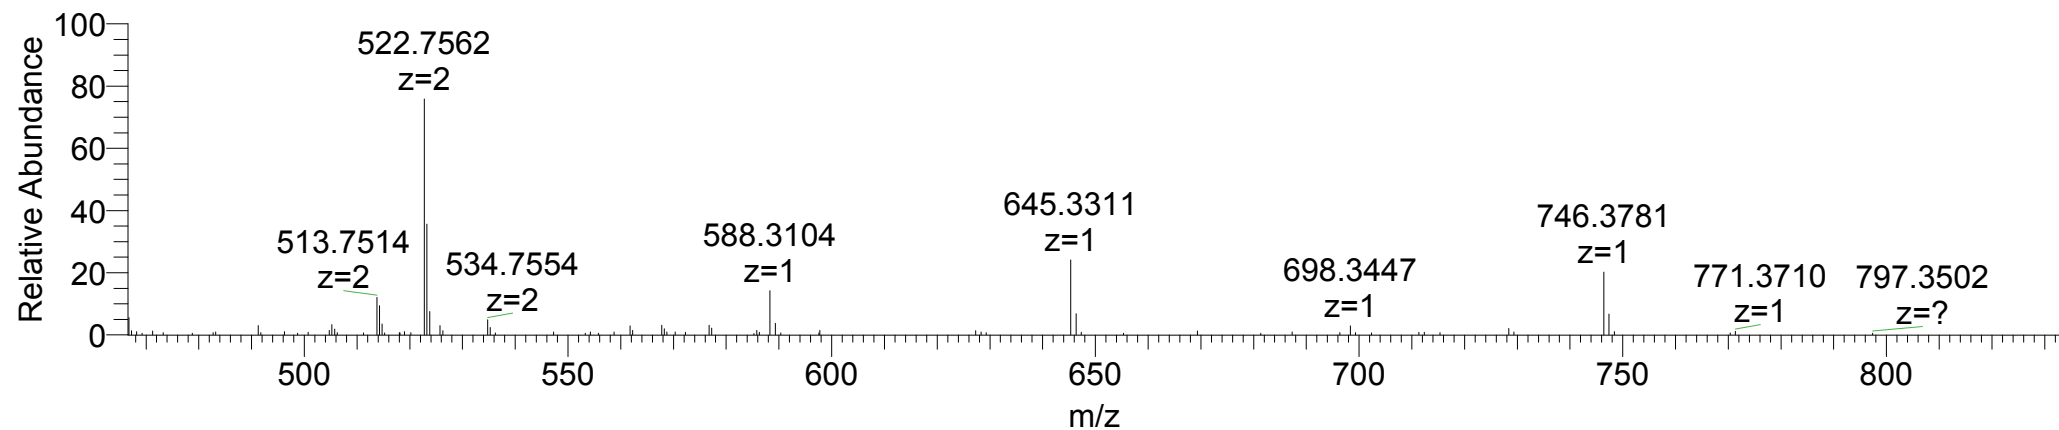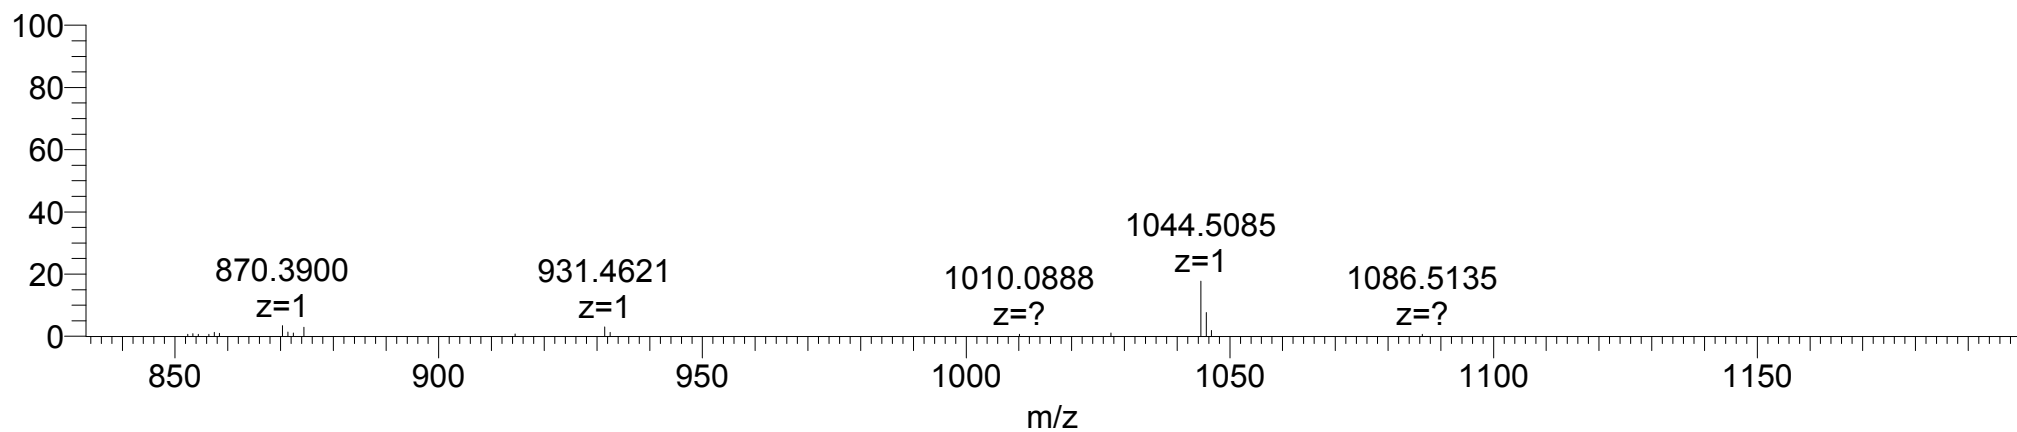

Human

9.

**P639-OH, K642-OH.Gal.Glc**

#631-645: GFDGLAGLPGEKGHR

| Ion                | charge state | Theoretical m/z (mono) | Experimental m/z (mono) | Mass error (Da) | Mass error (PPM) |
|--------------------|--------------|------------------------|-------------------------|-----------------|------------------|
| [M+3H]+2OH+Gal.Glc | 3            | 622.9620               | 622.9612                | -0.0024         | -1.3             |
| a2                 | 1            | 177.1022               | 177.1027                | 0.0005          | 2.8              |
| b2                 | 1            | 205.0972               | 205.0973                | 0.0001          | 0.4              |
| b3/FDG             | 1            | 320.1241               | 320.1240                | -0.0001         | -0.3             |
| y3                 | 1            | 369.1993               | 369.1998                | 0.0005          | 1.4              |
| y7+2OH             | 2            | 406.7041               | 406.7047                | 0.0012          | 1.5              |
| y9+2OH             | 2            | 491.7569               | 491.7570                | 0.0002          | 0.2              |
| y10+2OH            | 2            | 527.2754               | 527.2762                | 0.0016          | 1.5              |
| y10+2OH+Gal        | 2            | 608.3018               | 608.3047                | 0.0058          | 4.8              |
| y12+2OH            | 2            | 612.3282               | 612.3284                | 0.0004          | 0.3              |
| y9+2OH+Gal.Glc     | 2            | 653.8097               | 653.8105                | 0.0016          | 1.2              |
| y13+2OH            | 2            | 669.8417               | 669.8426                | 0.0018          | 1.3              |
| y13+2OH+Gal        | 2            | 750.8681               | 750.8685                | 0.0008          | 0.5              |
| [M+2H]+2OH         | 2            | 771.8866               | 771.8881                | 0.0030          | 1.9              |
| y7+2OH             | 1            | 812.4009               | 812.4027                | 0.0018          | 2.2              |
| y13+2OH+Gal.Glc    | 2            | 831.8945               | 831.8975                | 0.0060          | 3.6              |
| y9+2OH             | 1            | 982.5065               | 982.5113                | 0.0048          | 4.9              |
| y10+2OH            | 1            | 1053.5436              | 1053.5516               | 0.0080          | 7.6              |

9\_22\_2011CollagenTrypsin\_HCD\_1 #2368 RT: 21.73 AV: 1 NL: 4.36E5

T: FTMS + c NSI d Full ms2 622.96@hcd30.00 [115.00-1880.00]

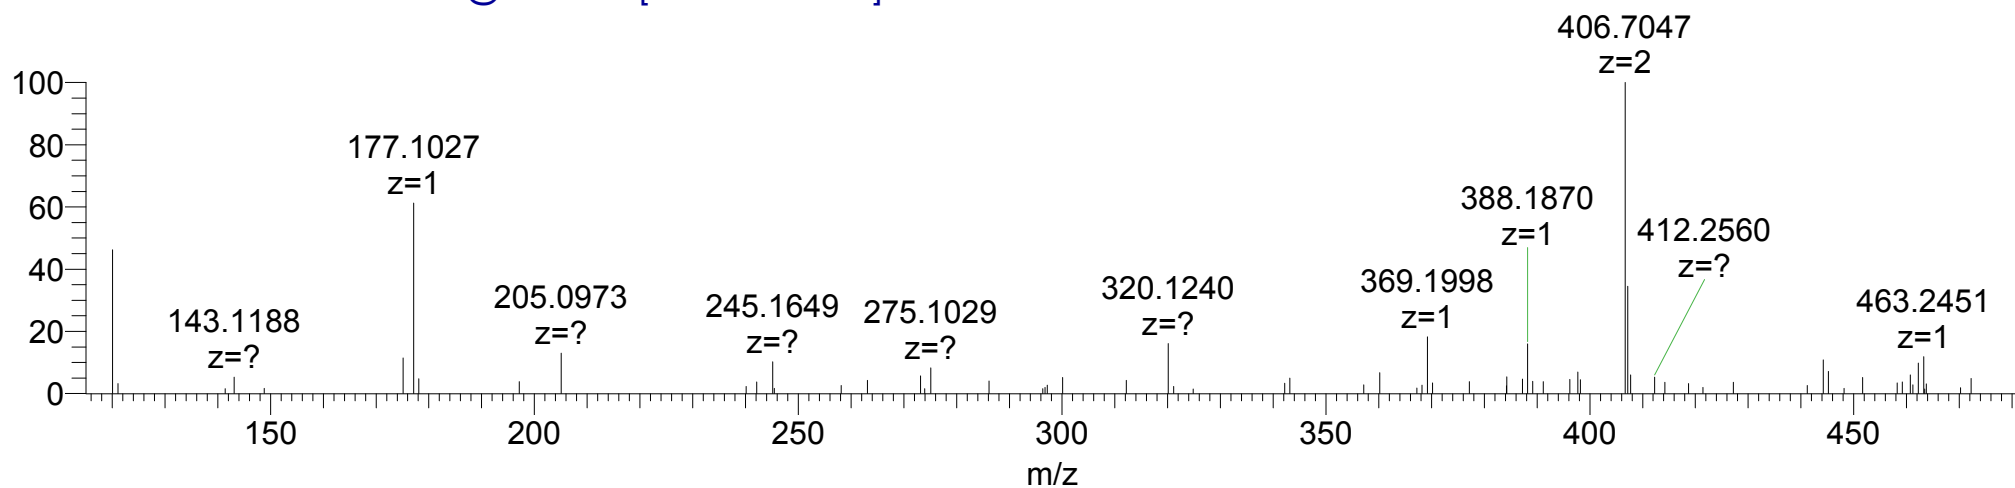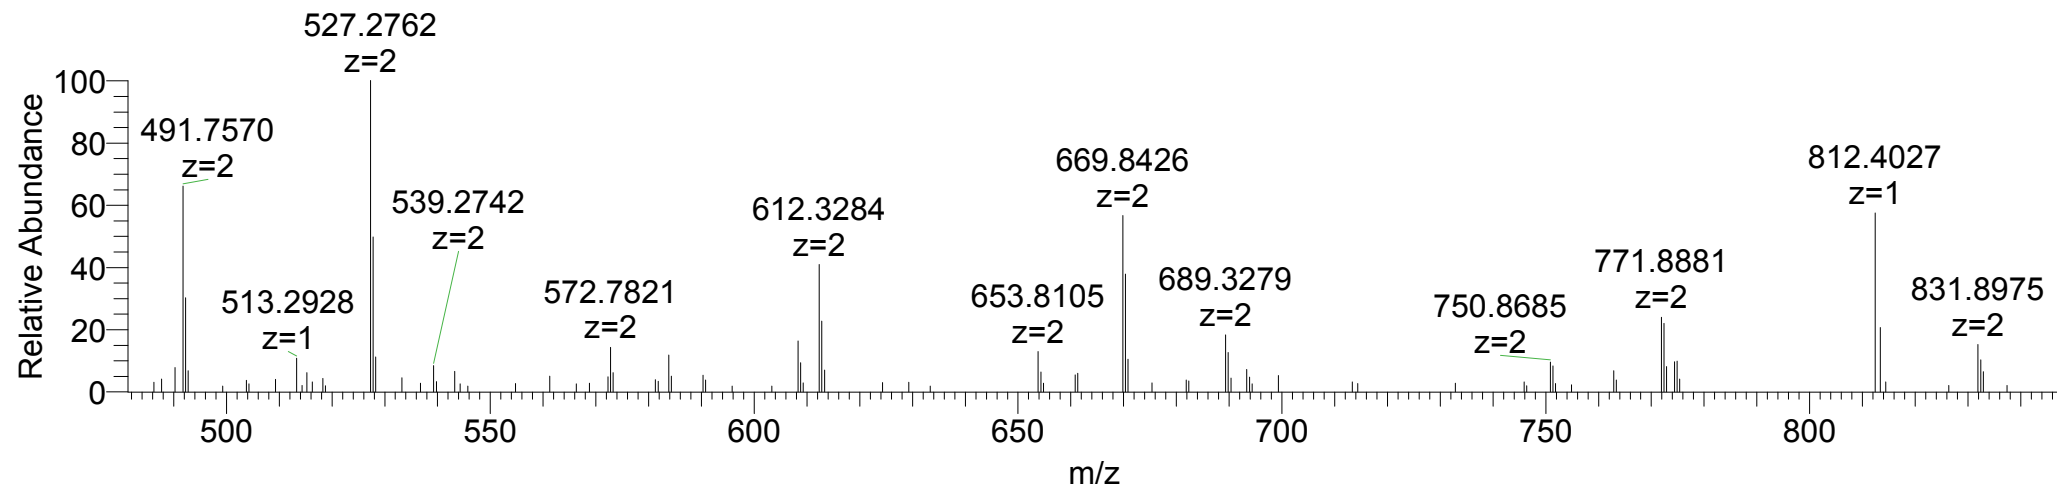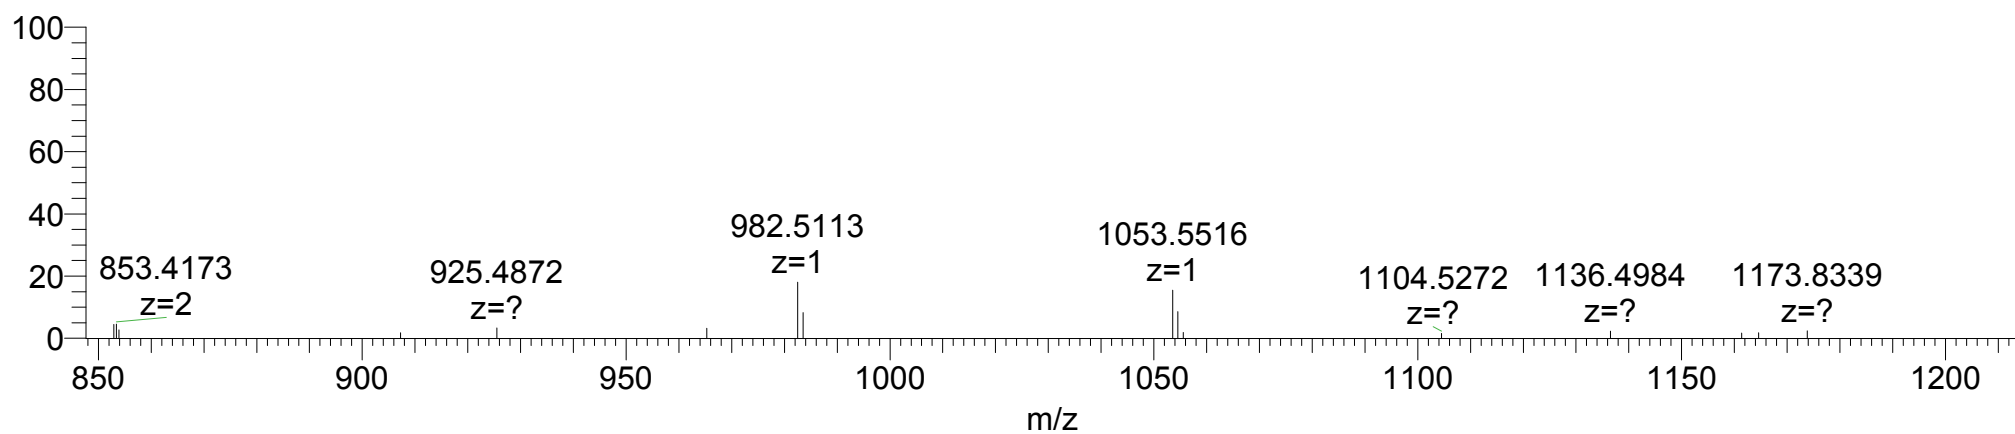

Human

10.

**P639-OH, K642-OH.Gal, P657-OH**

#633-658: DGLAGLPGEKGHRGDPGPGSGPPGPG

| Ion            | charge state | Theoretical m/z (mono) | Experimental m/z (mono) | Mass error (Da) | Mass error (PPM) |
|----------------|--------------|------------------------|-------------------------|-----------------|------------------|
| [M+3H]+5OH+Gal | 3            | 873.4037               | 873.3955                | -0.0246         | -9.4             |
| y2+OH          | 1            | 189.0870               | 189.0854                | -0.0016         | -8.5             |
| a3             | 1            | 258.1448               | 258.1426                | -0.0022         | -8.6             |
| b3             | 1            | 286.1397               | 286.1372                | -0.0025         | -8.8             |
| b4             | 1            | 357.1769               | 357.1739                | -0.0030         | -8.4             |
| b5             | 1            | 414.1983               | 414.1950                | -0.0033         | -8.0             |
| y5+2OH         | 1            | 456.2089               | 456.2047                | -0.0042         | -9.2             |
| b6             | 1            | 527.2824               | 527.2789                | -0.0035         | -6.7             |
| y6+2OH         | 1            | 553.2617               | 553.2571                | -0.0046         | -8.3             |
| y7+2OH         | 1            | 610.2831               | 610.2780                | -0.0051         | -8.4             |
| y8-H2O+2OH     | 1            | 679.3046               | 679.2967                | -0.0079         | -11.6            |
| b15+2OH+Gal    | 2            | 746.8606               | 746.8533                | -0.0146         | -9.8             |
| b20+3OH+Gal    | 2            | 952.4483               | 952.4392                | -0.0182         | -9.6             |
| y20+5OH        | 2            | 965.4379               | 965.4297                | -0.0164         | -8.5             |
| b21+3OH        | 2            | 1000.9747              | 1000.9637               | -0.0220         | -11.0            |
| y22+5OH        | 2            | 1050.4907              | 1050.4823               | -0.0168         | -8.0             |
| y23+5OH        | 2            | 1086.0092              | 1086.0010               | -0.0164         | -7.6             |
| y22+5OH+Gal    | 2            | 1131.5171              | 1131.5063               | -0.0216         | -9.6             |
| y23+5OH+Gal    | 2            | 1167.0356              | 1167.0267               | -0.0178         | -7.6             |
| [M+2H]+5OH     | 2            | 1228.5755              | 1228.5625               | -0.0260         | -10.6            |

\*Unlocalized sites: P648-OH?, P650-OH?, P654-OH?, P656-OH?

Pseudolocalized sites: P648-OH, P654-OH

12\_9\_2011Col5a1\_AspNGluC\_3 #2030 RT: 18.48 AV: 1 NL: 7.99E4

T: FTMS + c NSI d Full ms2 873.73@hcd30.00 [100.00-2000.00]

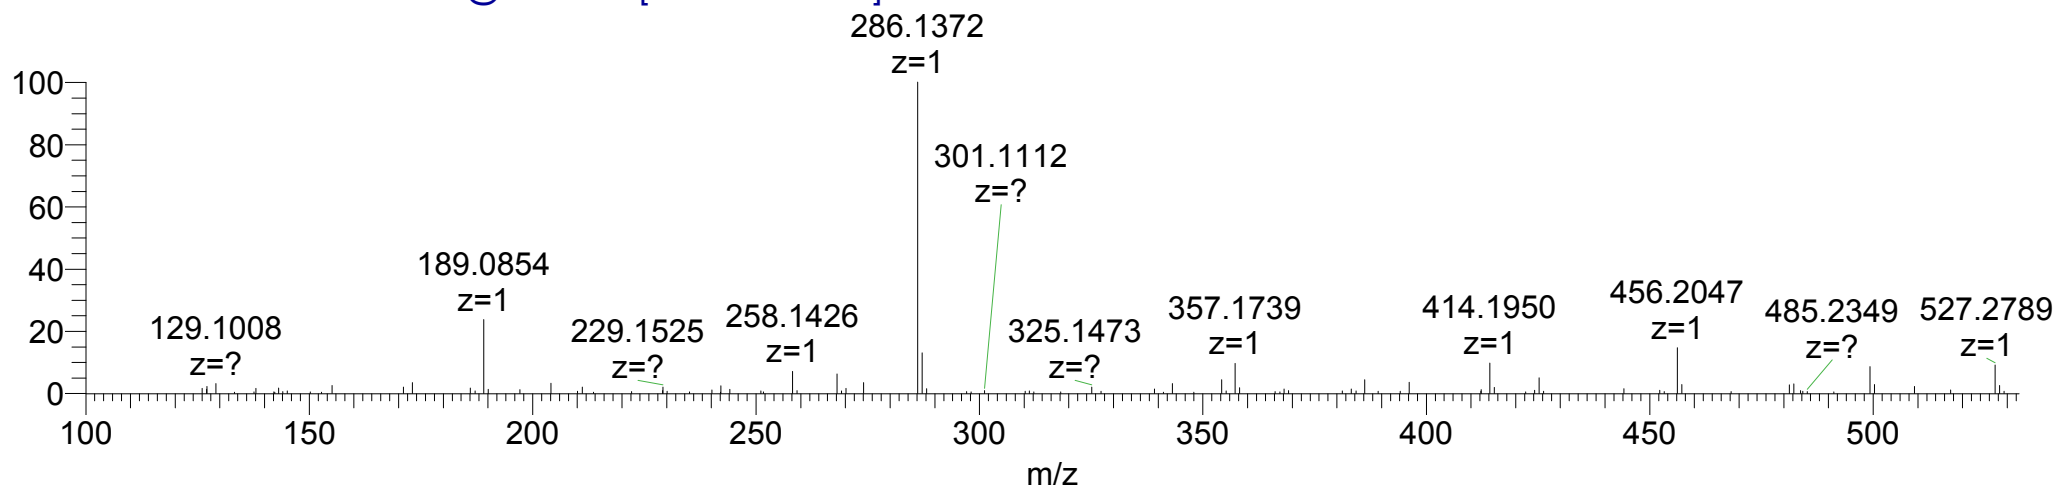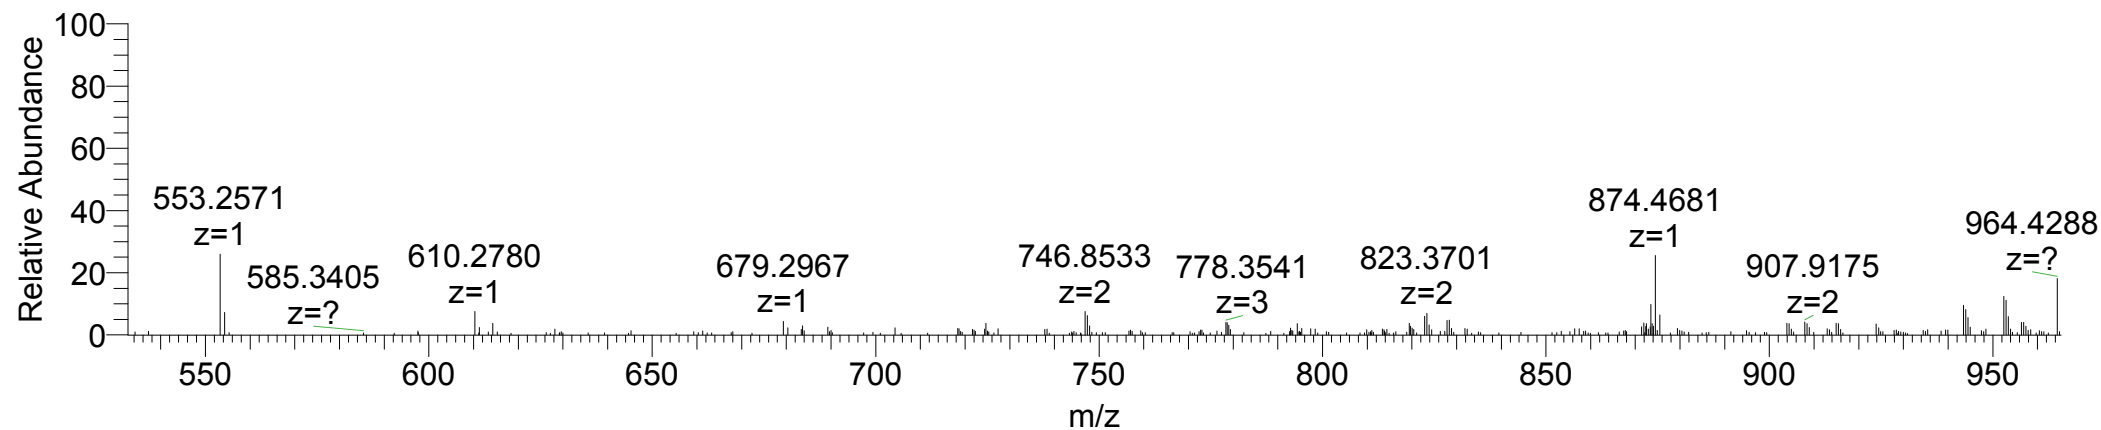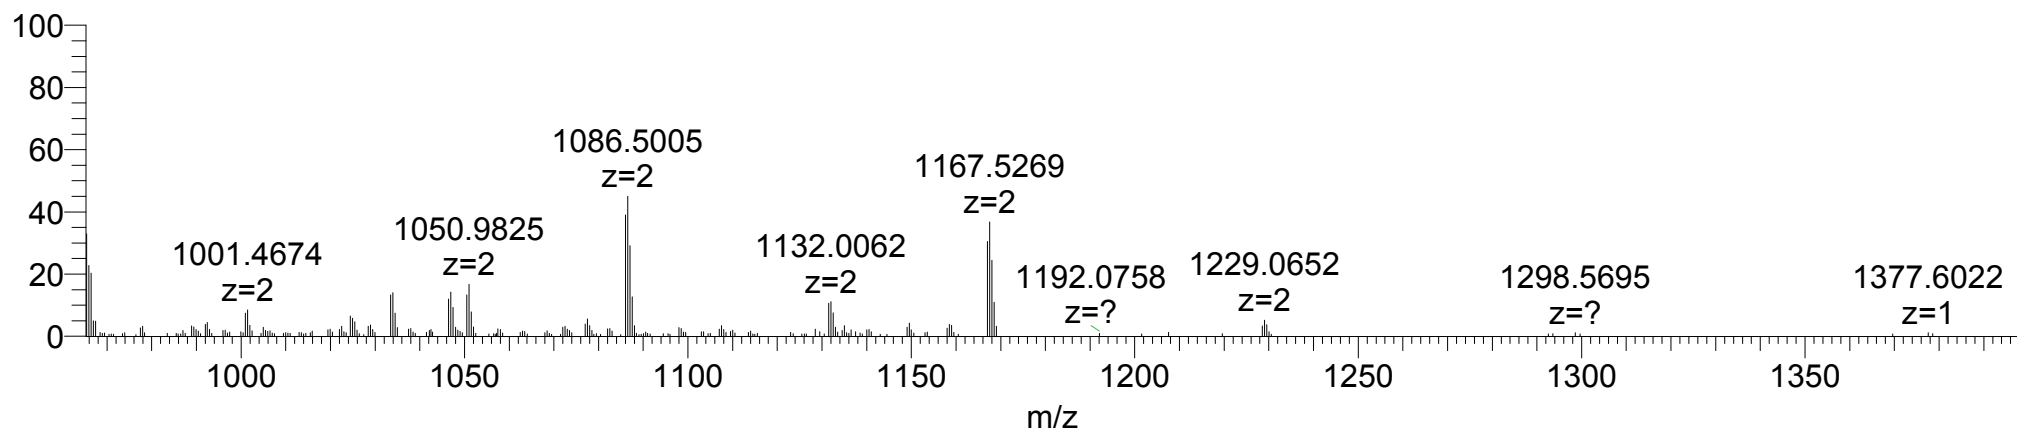

Human

11.

**P648-OH, P653-OH, P654-OH, P656-OH, P657-OH**

#646-672: GDPGPSGPPGPPGDDGERGDDGEVGPR

MS<sup>2</sup>: GDPGPSGPPGPPGDDGERGDDGEVGPR

| Ion                       | charge state | Theoretical m/z (mono) | Experimental m/z (mono) | Mass error (Da) | Mass error (PPM) |
|---------------------------|--------------|------------------------|-------------------------|-----------------|------------------|
| MH+4OH                    | 3            | 869.6990               | 869.6970                | -0.0060         | -2.3             |
| y4                        | 1            | 428.2616               | 428.2623                | 0.0007          | 1.6              |
| y12                       | 2            | 622.2867               | 622.2885                | 0.0036          | 2.9              |
| y20+3OH                   | 3            | 675.2911               | 675.2936                | 0.0075          | 3.7              |
| y13                       | 2            | 679.8002               | 679.8024                | 0.0044          | 3.2              |
| y7                        | 1            | 729.3526               | 729.3558                | 0.0032          | 4.4              |
| y23+3OH                   | 3            | 755.6599               | 755.6622                | 0.0069          | 3.0              |
| y25+4OH(MS <sup>3</sup> ) | 3            | 812.3496               | 812.3511                | 0.0045          | 1.8              |
| y18+OH                    | 2            | 899.3854               | 899.3877                | 0.0046          | 2.6              |
| y19+2OH                   | 2            | 955.9092               | 955.9120                | 0.0056          | 2.9              |
| y19+3OH                   | 2            | 963.9066               | 963.9094                | 0.0056          | 2.9              |
| y20+3OH                   | 2            | 1012.4330              | 1012.4366               | 0.0072          | 3.6              |
| y21+3OH                   | 2            | 1040.9438              | 1040.9456               | 0.0036          | 1.7              |
| y23+3OH                   | 2            | 1132.9862              | 1132.9895               | 0.0066          | 2.9              |

MS<sup>3</sup>: PGPSGPPGPPGDDGERGDDGEVGPR or PGPSGPPGPPGDDGERGDDGEVGPR

| Ion        | charge state | Theoretical m/z (mono) | Experimental m/z (mono) | Mass error (Da) | Mass error (PPM) |
|------------|--------------|------------------------|-------------------------|-----------------|------------------|
| MH+4OH     | 3            | 812.3496               | 812.3511                | 0.0045          | 1.8              |
| b4-H2O+OH  | 1            | 337.1506               | 337.1500                | -0.0006         | -1.8             |
| b5-H2O+OH  | 1            | 394.1721               | 394.1717                | -0.0004         | -1.0             |
| b5+OH      | 1            | 412.1827               | 412.1824                | -0.0003         | -0.7             |
| y4         | 1            | 428.2616               | 428.2607                | -0.0009         | -2.1             |
| y10        | 2            | 529.2547               | 529.2556                | 0.0018          | 1.7              |
| y6         | 1            | 614.3257               | 614.3246                | -0.0011         | -1.8             |
| y12        | 2            | 622.2867               | 622.2862                | -0.0010         | -0.8             |
| y20+3OH    | 3            | 675.2911               | 675.2908                | -0.0009         | -0.4             |
| y13        | 2            | 679.8002               | 679.7995                | -0.0014         | -1.0             |
| y23+3OH    | 3            | 755.6599               | 755.6584                | -0.0045         | -2.0             |
| y24+3OH    | 3            | 774.6670               | 774.6658                | -0.0036         | -1.6             |
| MH-H2O+4OH | 3            | 806.3461               | 806.3450                | -0.0033         | -1.4             |
| MH+4OH     | 3            | 812.3496               | 812.3422                | -0.0222         | -9.1             |
| y18+OH     | 2            | 899.3854               | 899.3850                | -0.0008         | -0.4             |
| y18+2OH    | 2            | 907.3828               | 907.3815                | -0.0026         | -1.4             |
| b19+4OH    | 2            | 911.3615               | 911.3618                | 0.0006          | 0.3              |



Human

| Ion     | charge state | Theoretical m/z (mono) | Experimental m/z (mono) | Mass error (Da) | Mass error (PPM) |
|---------|--------------|------------------------|-------------------------|-----------------|------------------|
| y19+3OH | 2            | 963.9066               | 963.9030                | -0.0072         | -3.7             |
| y19+2OH | 2            | 955.9092               | 955.9072                | -0.0040         | -2.1             |
| y20+3OH | 2            | 1012.4330              | 1012.4333               | 0.0006          | 0.3              |
| y21+3OH | 2            | 1040.9438              | 1040.9413               | -0.0050         | -2.4             |

10\_7\_2011Collagen\_Trypsin\_MS3\_CIDandHCD #1990 RT: 18.60 AV: 1 NL: 5.18E5

T: FTMS + c NSI d Full ms2 870.03@cid35.00 [225.00-2000.00]

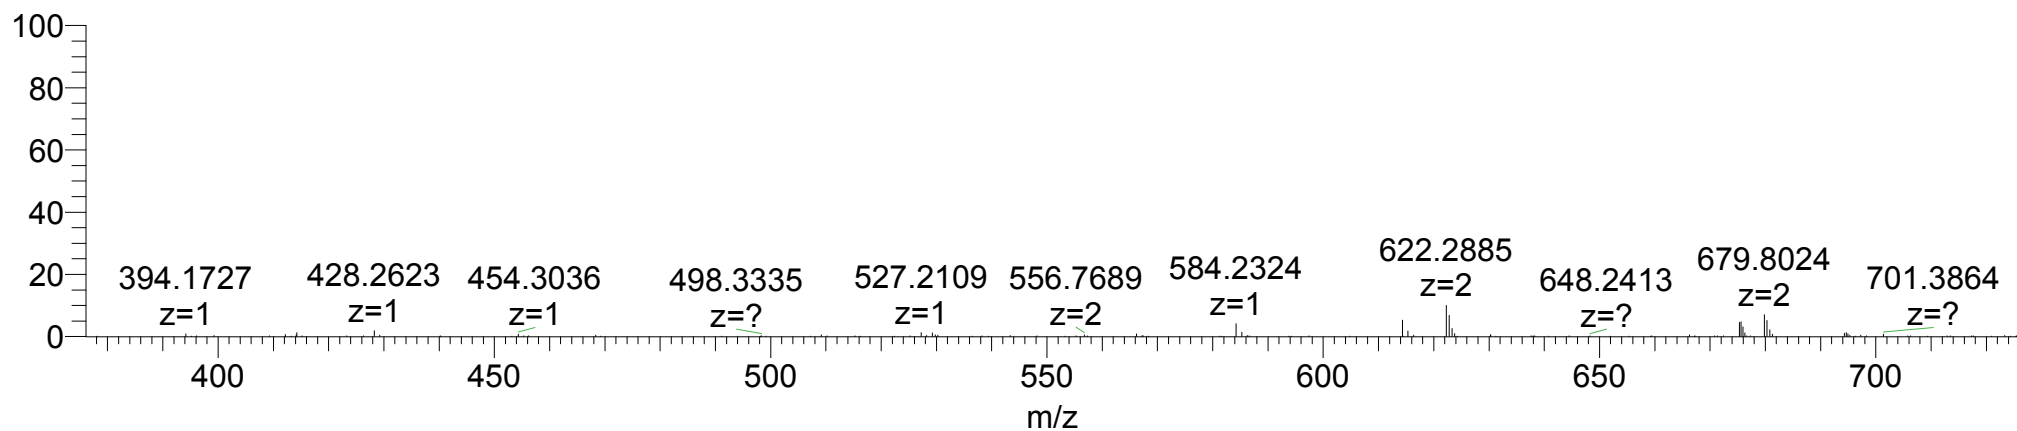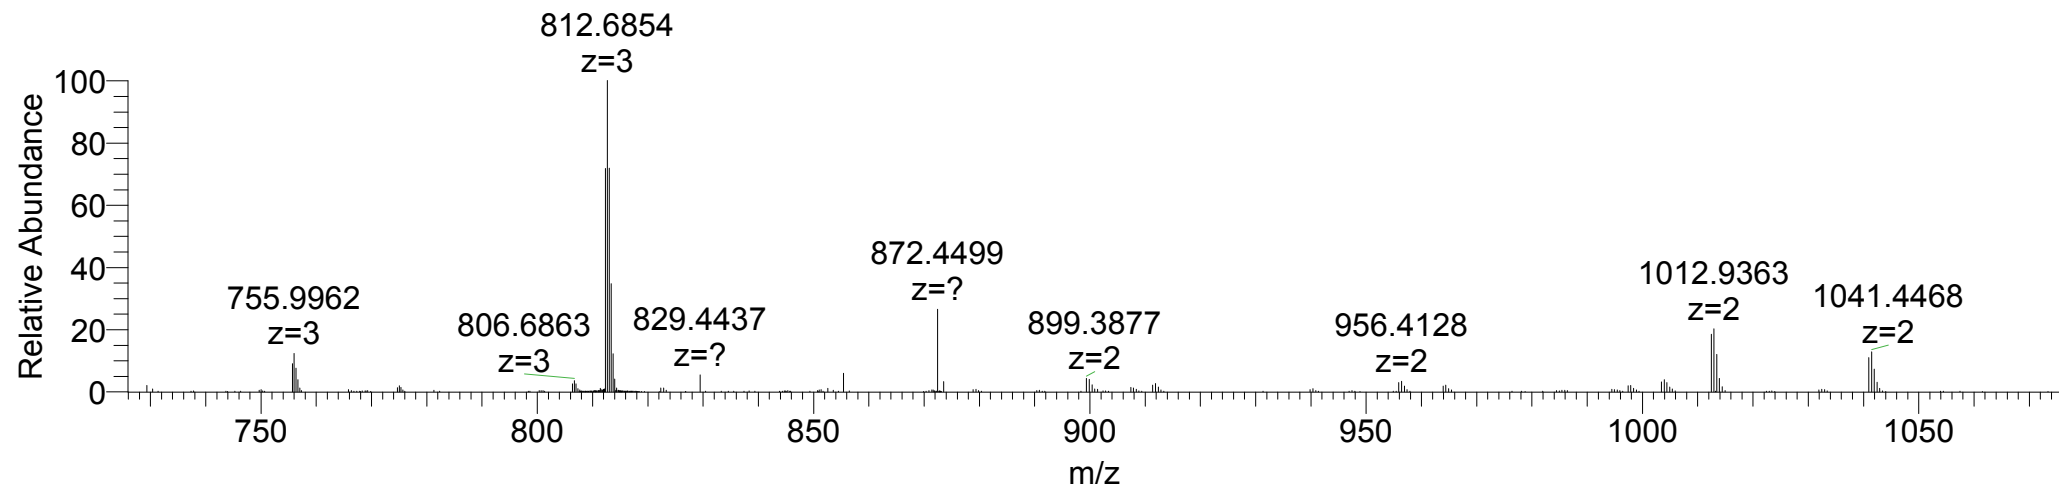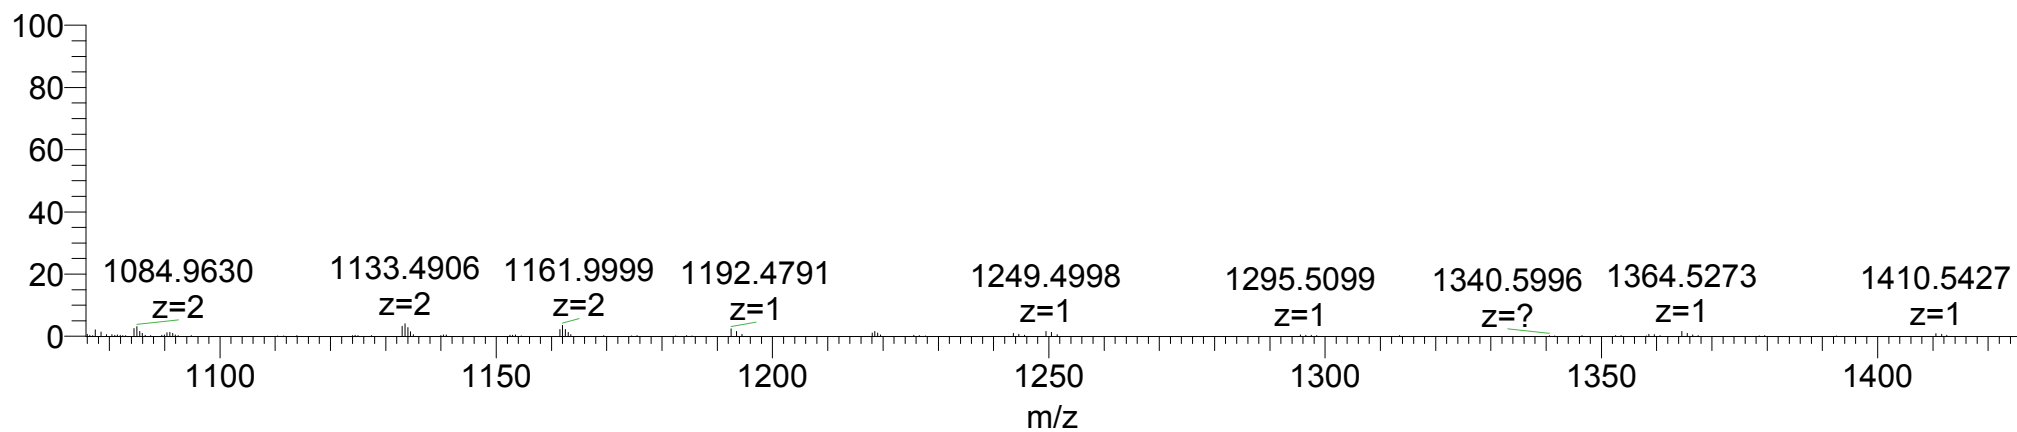

10\_7\_2011Collagen\_Trypsin\_MS3\_CIDandHCD #1991 RT: 18.61 AV: 1 NL: 1.28E5

T: FTMS + c NSI d Full ms3 870.03@cid35.00 812.69@hcd30.00 [110.00-2000.00]

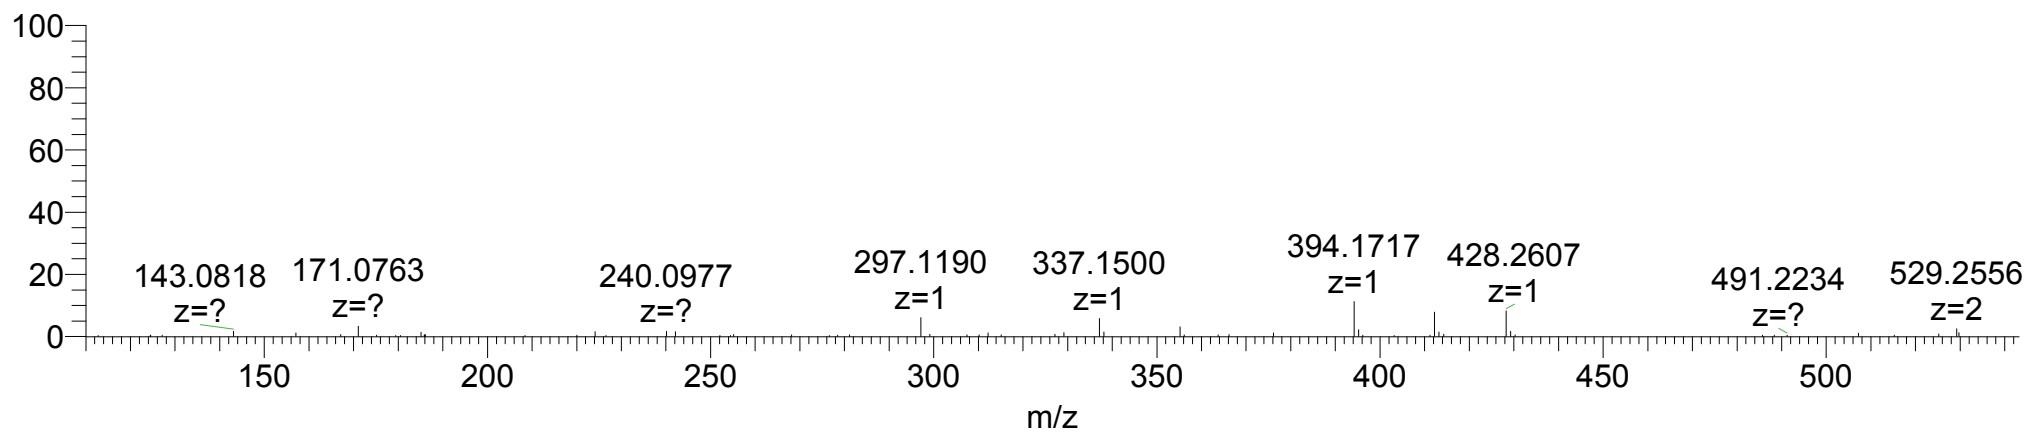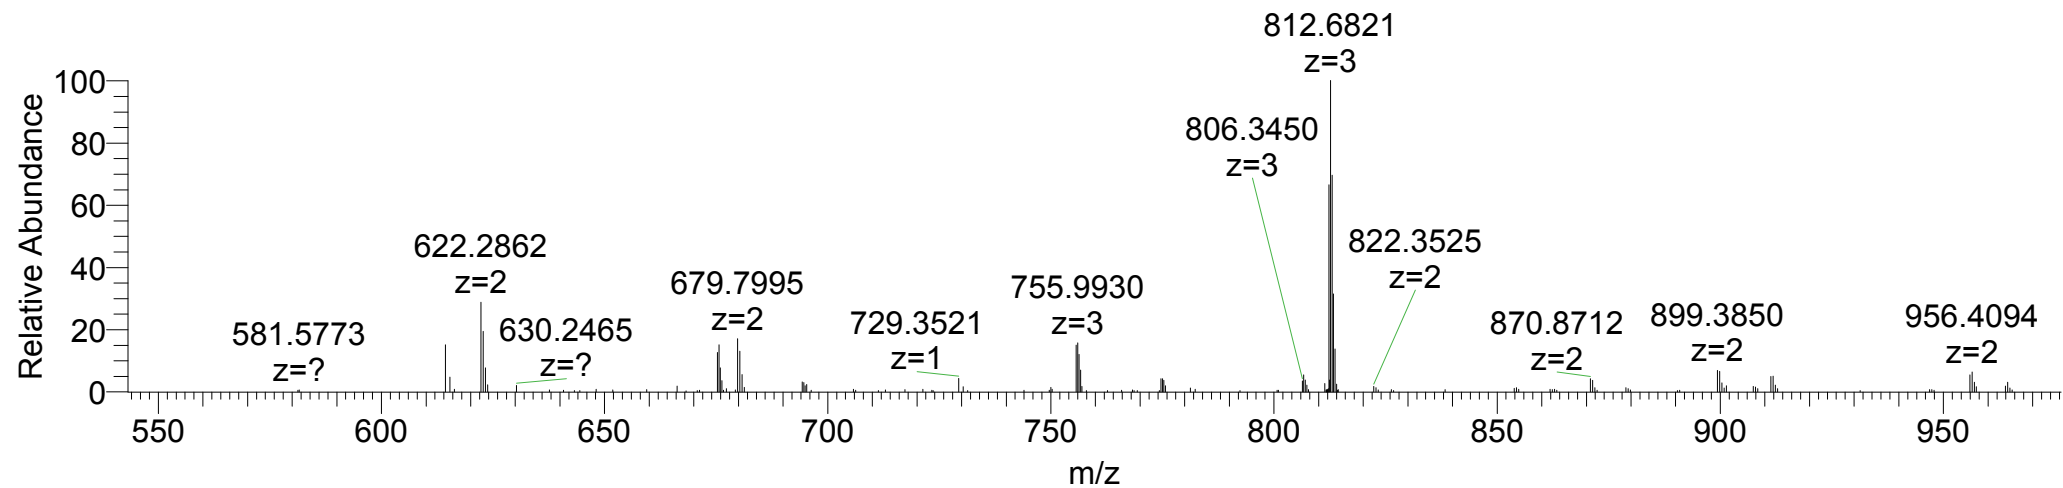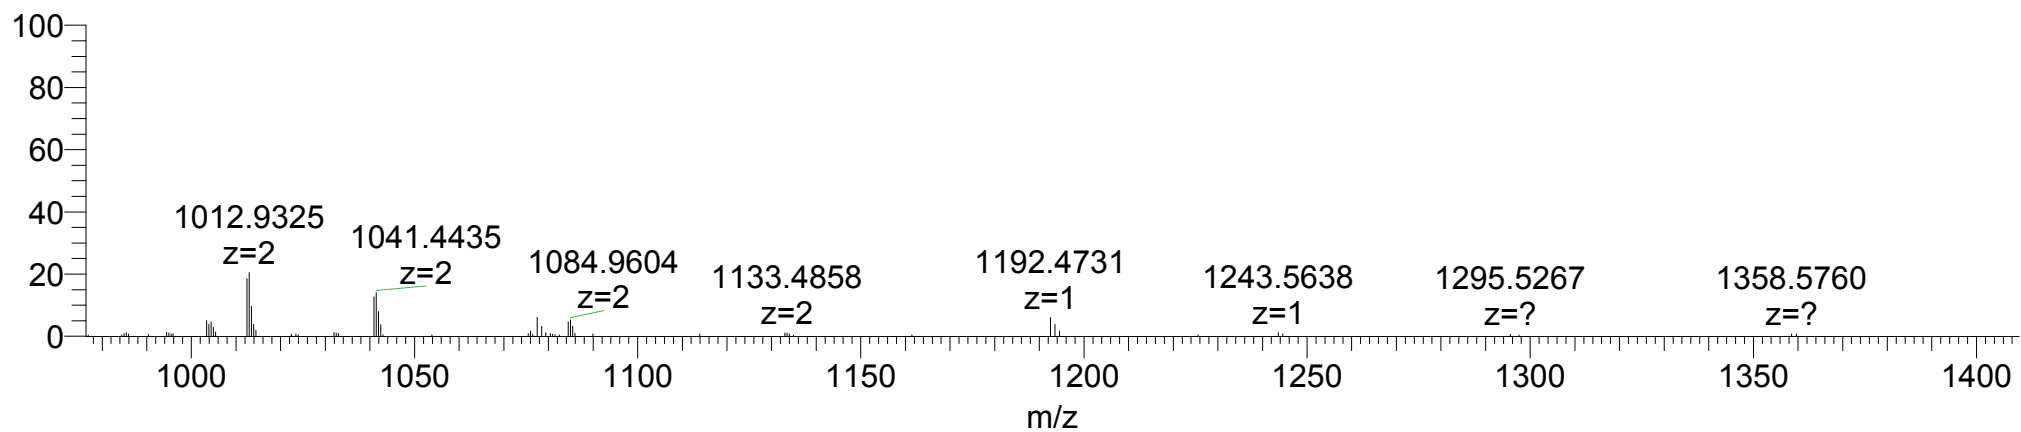

Human

## 12.

### P675-OH, P678-OH

#673-681: GLPGEPGPR

MS<sup>2</sup>: GLPGEPGPR

| Ion                      | charge state | Theoretical m/z (mono) | Experimental m/z (mono) | Mass error (Da) | Mass error (PPM) |
|--------------------------|--------------|------------------------|-------------------------|-----------------|------------------|
| [M+2H]+2OH               | 2            | 456.2327               | 456.2319                | -0.0016         | -1.8             |
| y7+2OH(MS <sup>3</sup> ) | 2            | 371.1799               | 371.1797                | -0.0004         | -0.5             |
| y4+OH                    | 1            | 442.2409               | 442.2401                | -0.0008         | -1.8             |
| b5+OH                    | 1            | 470.2245               | 470.2240                | -0.0005         | -1.1             |
| y7+2OH                   | 1            | 741.3526               | 741.3519                | -0.0007         | -0.9             |

MS<sup>3</sup>: PGEPGPR

| Ion                | charge state | Theoretical m/z (mono) | Experimental m/z (mono) | Mass error (Da) | Mass error (PPM) |
|--------------------|--------------|------------------------|-------------------------|-----------------|------------------|
| PG-28+OH/<br>a2+OH | 1            | 143.0815               | 143.0816                | 0.0001          | 0.7              |
| PG+OH/b2+OH        | 1            | 171.0764               | 171.0765                | 0.0001          | 0.6              |
| y4+OH              | 2            | 221.6241               | 221.6241                | 0.0000          | 0.0              |
| GEP-28+OH/a3       | 1            | 272.1241               | 272.1243                | 0.0002          | 0.7              |
| EPG+OH/b3          | 1            | 300.1190               | 300.1192                | 0.0002          | 0.7              |
| y3                 | 1            | 329.1932               | 329.1932                | 0.0000          | 0.0              |
| [M+2H]+2OH         | 2            | 371.1799               | 371.1800                | 0.0002          | 0.3              |
| y4+OH              | 1            | 442.2409               | 442.2407                | -0.0002         | -0.5             |
| b5+2OH             | 1            | 470.1882               | 470.1877                | -0.0005         | -1.1             |
| y5-H2O+OH          | 1            | 553.2729               | 553.2729                | 0.0000          | 0.0              |
| y5+OH              | 1            | 571.2835               | 571.2836                | 0.0001          | 0.2              |
| y6-H2O+OH          | 1            | 610.2944               | 610.2943                | -0.0001         | -0.2             |
| y6+OH              | 1            | 628.3049               | 628.3048                | -0.0001         | -0.2             |

10\_7\_2011Collagen\_Trypsin\_MS3\_CIDandHCD #1382 RT: 14.52 AV: 1 NL: 4.69E7

T: FTMS + c NSI d Full ms2 456.73@cid35.00 [115.00-925.00]

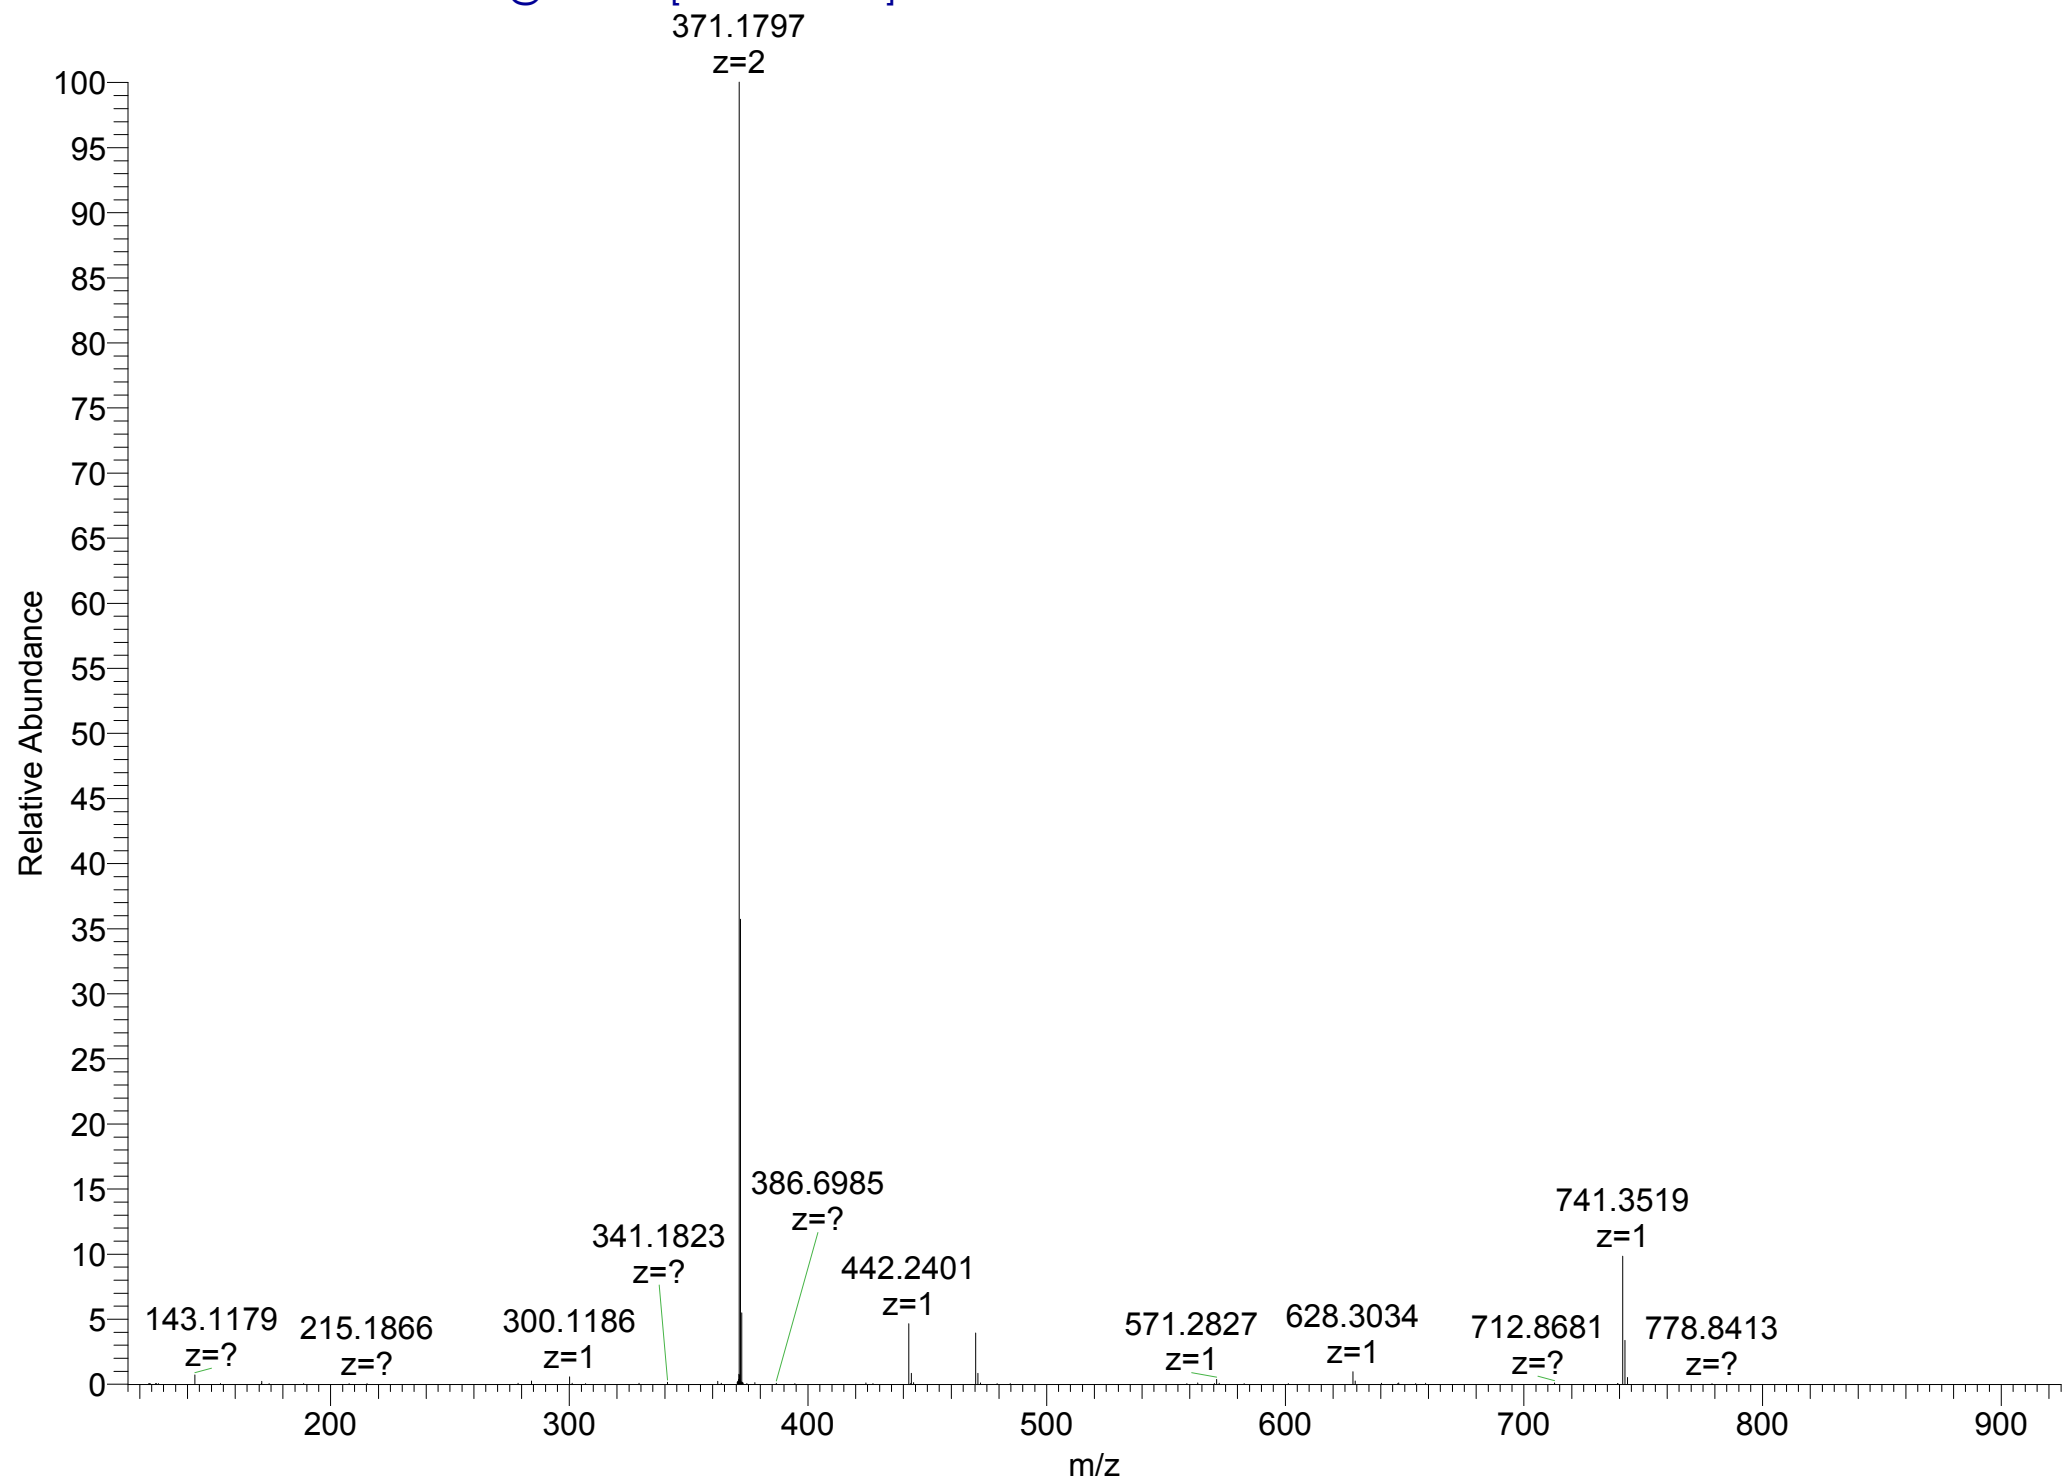

10\_7\_2011Collagen\_Trypsin\_MS3\_CIDandHCD #1383 RT: 14.52 AV: 1 NL: 2.66E7

T: FTMS + c NSI d Full ms3 456.73@cid35.00 371.18@hcd30.00 [110.00-755.00]

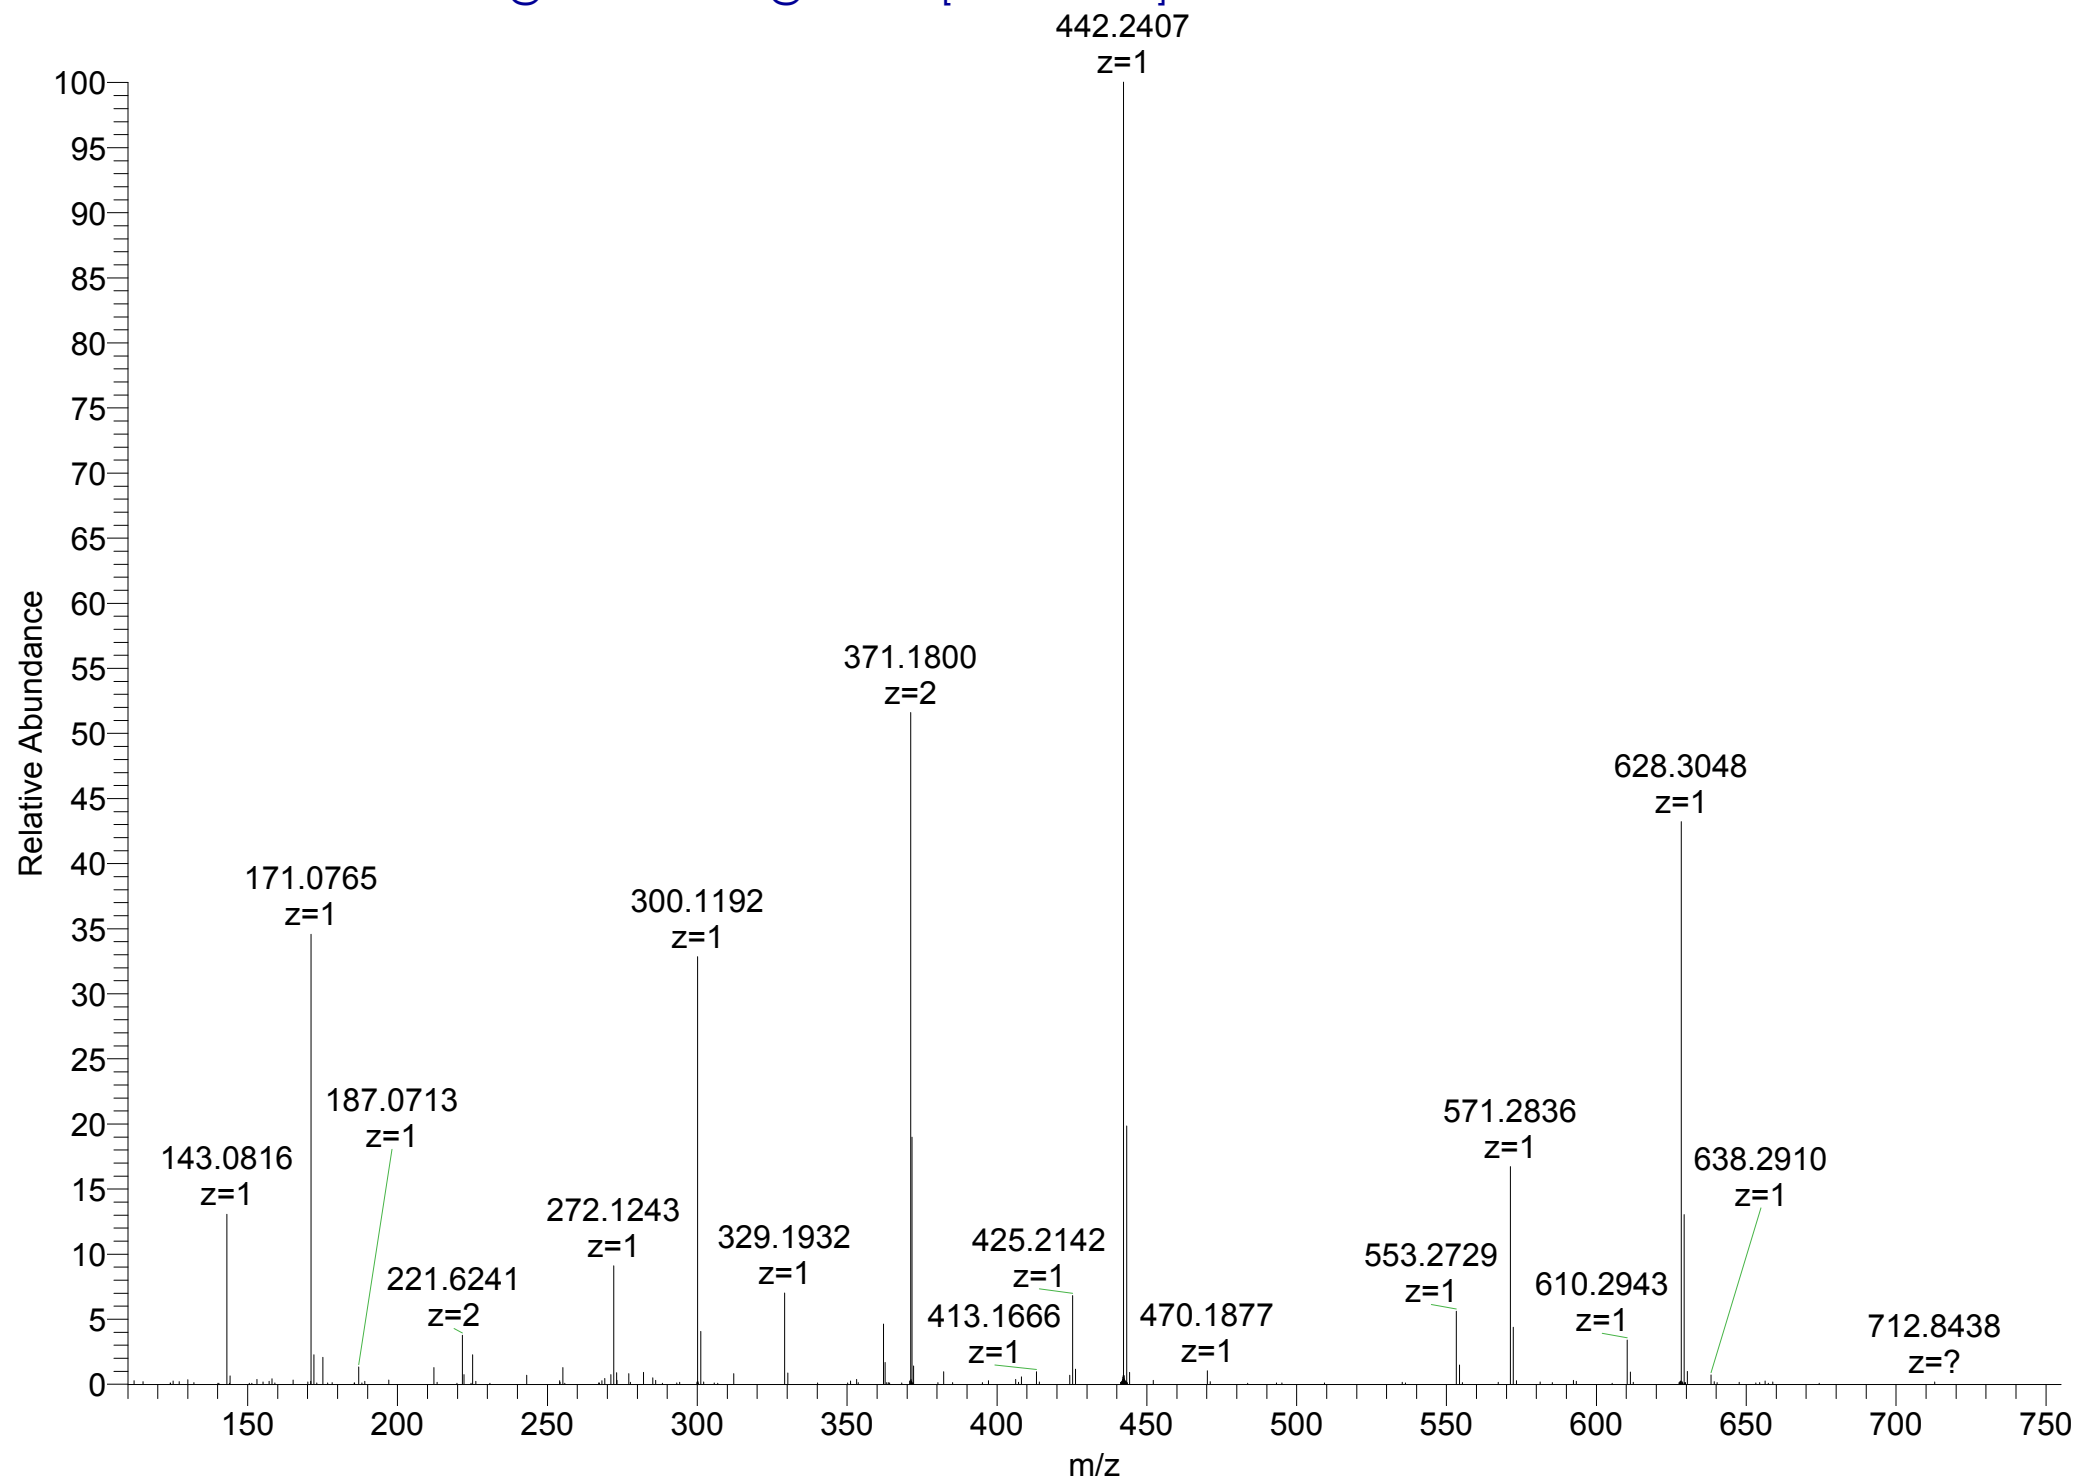

Human

13.

**P690-OH, P693-OH, P696-OH, P705-OH**

#688-708: GPPGPPGPPGVTGMDGQPGPK

| Ion         | charge state | Theoretical m/z (mono) | Experimental m/z (mono) | Mass error (Da) | Mass error (PPM) |
|-------------|--------------|------------------------|-------------------------|-----------------|------------------|
| [M+2H]+5OH  | 2            | 988.9546               | 988.9441                | -0.0210         | -10.6            |
| y4+2OH      | 1            | 430.2296               | 430.2267                | -0.0029         | -6.8             |
| b6+2OH      | 1            | 535.2511               | 535.2482                | -0.0029         | -5.4             |
| b7+2OH      | 1            | 592.2726               | 592.2689                | -0.0037         | -6.3             |
| y6+2OH      | 1            | 615.3097               | 615.3050                | -0.0047         | -7.7             |
| b8+2OH      | 1            | 689.3253               | 689.3217                | -0.0036         | -5.2             |
| y7+2OH      | 1            | 730.3366               | 730.3312                | -0.0054         | -7.4             |
| y16+4OH     | 2            | 778.3565               | 778.3506                | -0.0118         | -7.6             |
| y17+4OH     | 2            | 826.8829               | 826.8766                | -0.0126         | -7.6             |
| b10+3OH     | 1            | 859.3945               | 859.3852                | -0.0093         | -10.8            |
| y19+5OH     | 2            | 911.9174               | 911.9111                | -0.0126         | -6.9             |
| y9+2OH      | 1            | 918.3986               | 918.3918                | -0.0068         | -7.4             |
| b11+3OH     | 1            | 958.4629               | 958.4567                | -0.0062         | -6.5             |
| y10+2OH     | 1            | 1019.4462              | 1019.4397               | -0.0065         | -6.4             |
| b12+3OH     | 1            | 1059.5106              | 1059.5017               | -0.0089         | -8.4             |
| y12+2OH     | 1            | 1175.5361              | 1175.5316               | -0.0045         | -3.8             |
| b14+3OH     | 1            | 1247.5725              | 1247.5643               | -0.0082         | -6.6             |
| y13+3OH     | 1            | 1288.5838              | 1288.5779               | -0.0059         | -4.6             |
| b15-H2O+3OH | 1            | 1344.5889              | 1344.5839               | -0.0050         | -3.7             |
| b15+3OH     | 1            | 1362.5994              | 1362.5912               | -0.0082         | -6.0             |
| y14+3OH     | 1            | 1385.6366              | 1385.6271               | -0.0095         | -6.9             |
| y15+3OH     | 1            | 1442.6580              | 1442.6533               | -0.0047         | -3.3             |
| b17-H2O+3OH | 1            | 1529.6689              | 1529.6578               | -0.0111         | -7.3             |
| b17+3OH     | 1            | 1547.6795              | 1547.6720               | -0.0075         | -4.8             |
| y16+4OH     | 1            | 1555.7057              | 1555.6970               | -0.0087         | -5.6             |
| y17+4OH     | 1            | 1652.7582              | 1652.7543               | -0.0039         | -2.4             |
| y18+4OH     | 1            | 1709.7799              | 1709.7695               | -0.0104         | -6.1             |
| b19+4OH     | 1            | 1717.7486              | 1717.7375               | -0.0111         | -6.5             |
| y19+5OH     | 1            | 1822.8276              | 1822.8176               | -0.0100         | -5.5             |

\*Unlocalized sites: P707-OH?, K708-OH?

Pseudolocalized sites: K708-OH

12\_9\_2011Col5a1\_Trypsin\_target\_MS3 #1594 RT: 20.70 AV: 1 NL: 9.31E4

T: FTMS + c NSI d Full ms2 988.94@cid35.00 [260.00-1990.00]

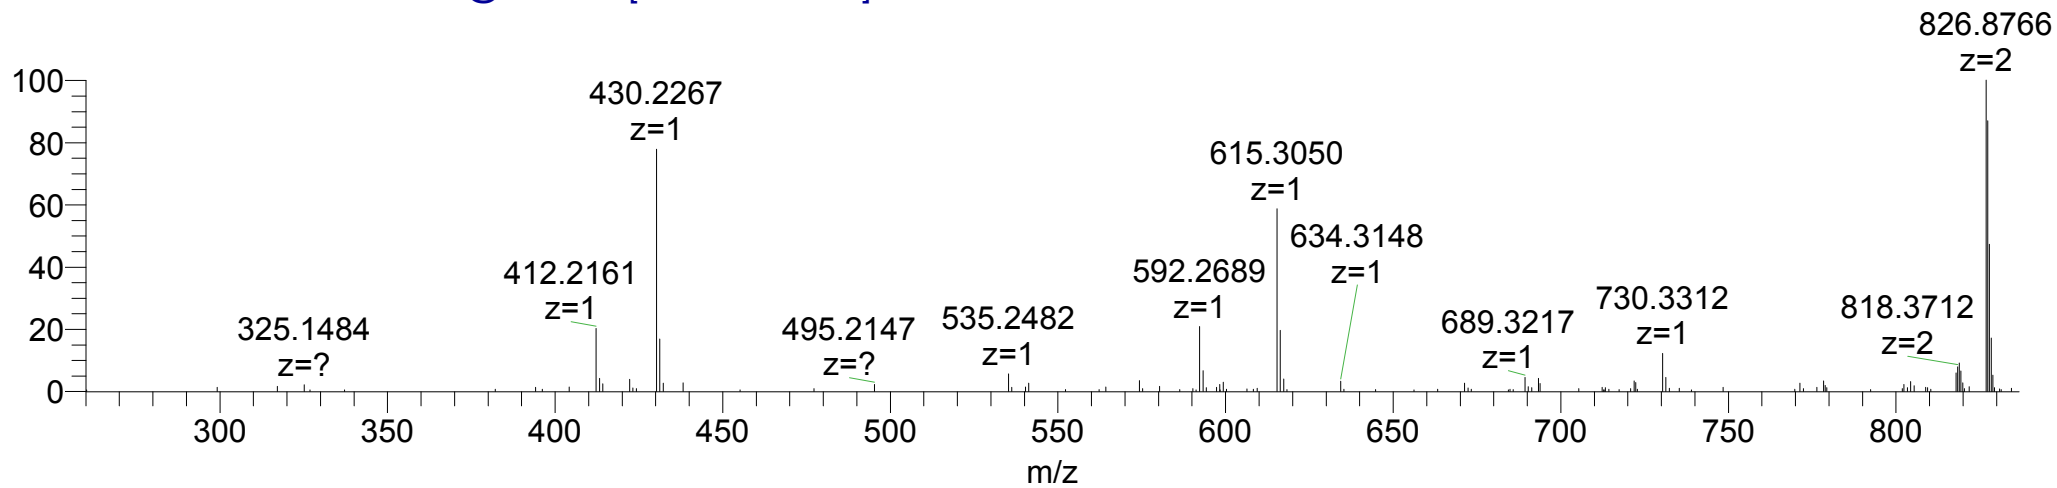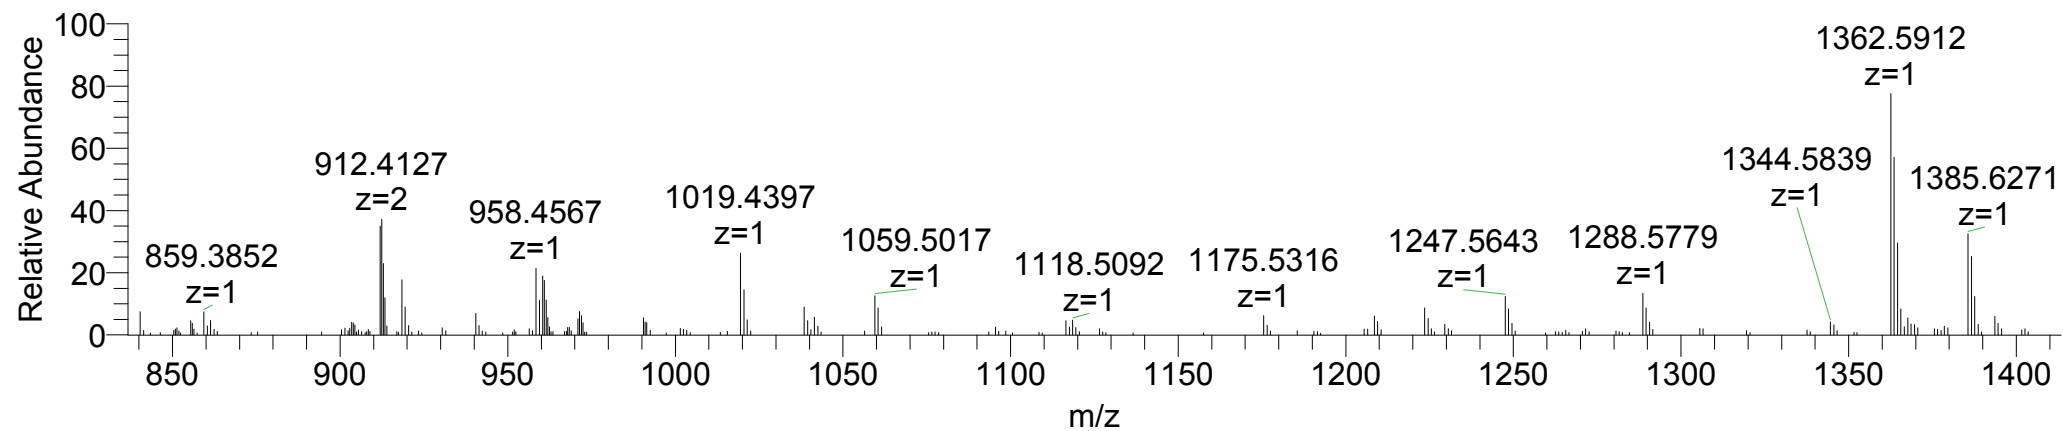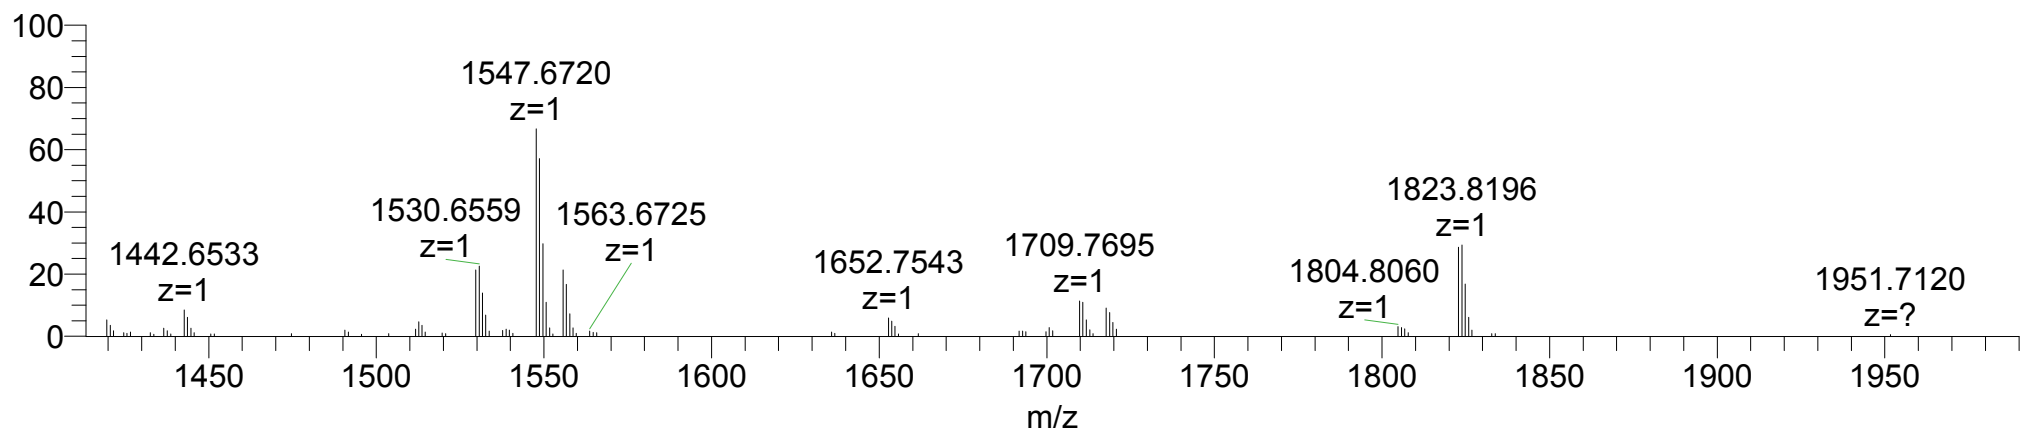



Human

14.

**K708-OH.Gal.Glc**

#702-716: DGQPGPKGNVGPQGE

| Ion                | charge state | Theoretical m/z (mono) | Experimental m/z (mono) | Mass error (Da) | Mass error (PPM) |
|--------------------|--------------|------------------------|-------------------------|-----------------|------------------|
| [M+2H]+2OH+Gal.Glc | 2            | 896.8896               | 896.8809                | -0.0174         | -9.7             |
| b2                 | 1            | 173.0557               | 173.0542                | -0.0015         | -8.7             |
| PQ                 | 1            | 226.1186               | 226.1169                | -0.0017         | -7.6             |
| b3                 | 1            | 301.1143               | 301.1119                | -0.0024         | -8.0             |
| y4-NH3             | 1            | 413.1667               | 413.1628                | -0.0039         | -9.5             |
| y4                 | 1            | 430.1932               | 430.1897                | -0.0035         | -8.2             |
| y5                 | 1            | 487.2147               | 487.2108                | -0.0039         | -8.0             |
| y12+2OH            | 2            | 584.7833               | 584.7786                | -0.0094         | -8.1             |
| b13-NH3+2OH        | 2            | 624.2862               | 624.2838                | -0.0048         | -3.9             |
| y12+2OH+Gal        | 2            | 665.8097               | 665.8083                | -0.0028         | -2.1             |
| PGPKGNV+2OH        | 1            | 682.3519               | 682.3475                | -0.0044         | -6.5             |
| PGPKGNVG+2OH       | 1            | 739.3733               | 739.3688                | -0.0045         | -6.1             |
| b10+2OH            | 1            | 982.4588               | 982.4521                | -0.0067         | -6.8             |
| b11+2OH            | 1            | 1039.4803              | 1039.4700               | -0.0103         | -9.9             |
| y12+2OH            | 1            | 1168.5593              | 1168.5522               | -0.0071         | -6.1             |
| y12+2OH+Gal        | 1            | 1330.6121              | 1330.6077               | -0.0044         | -3.3             |

\*Unlocalized sites: P705-OH?, P707-OH?

Pseudolocalized sites: P705-OH

12\_9\_2011Col5a1\_AspNGluC\_1 #1065 RT: 10.73 AV: 1 NL: 1.97E4

T: FTMS + c NSI d Full ms2 896.88@hcd30.00 [100.00-1805.00]

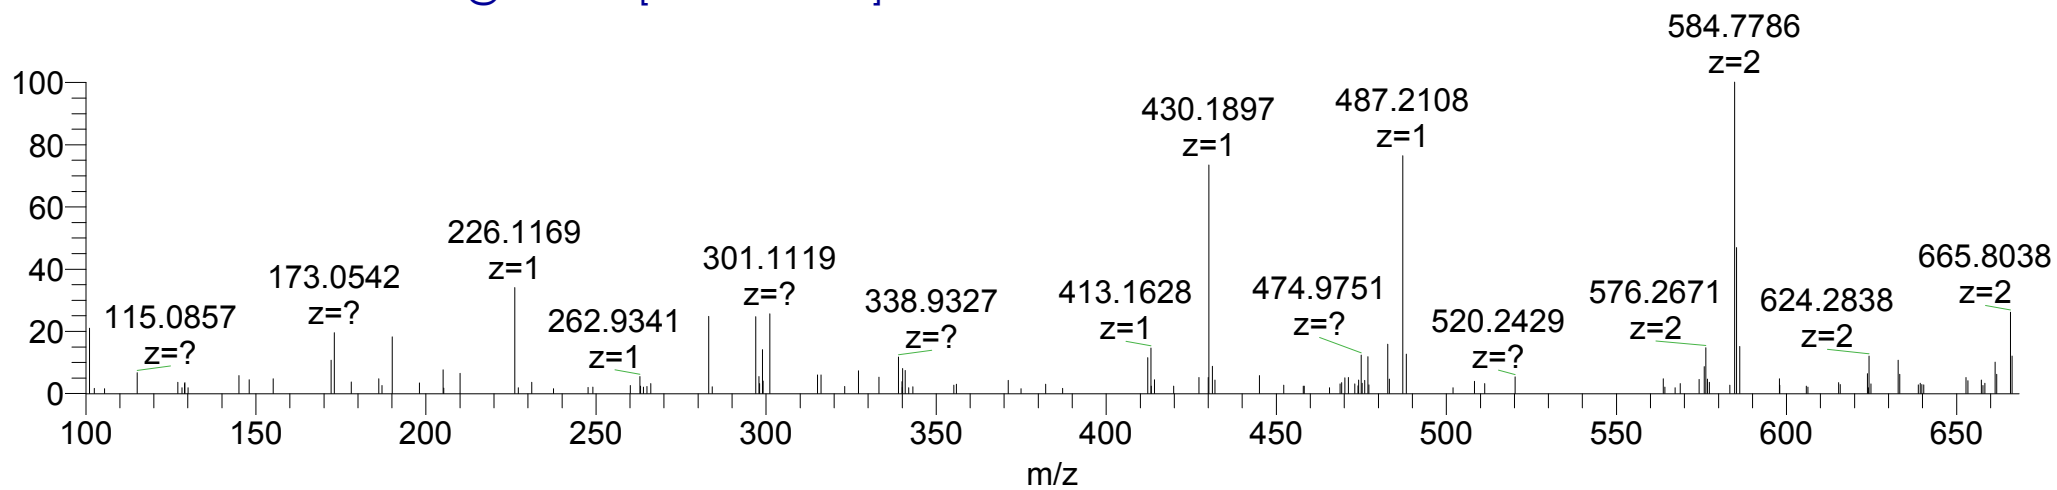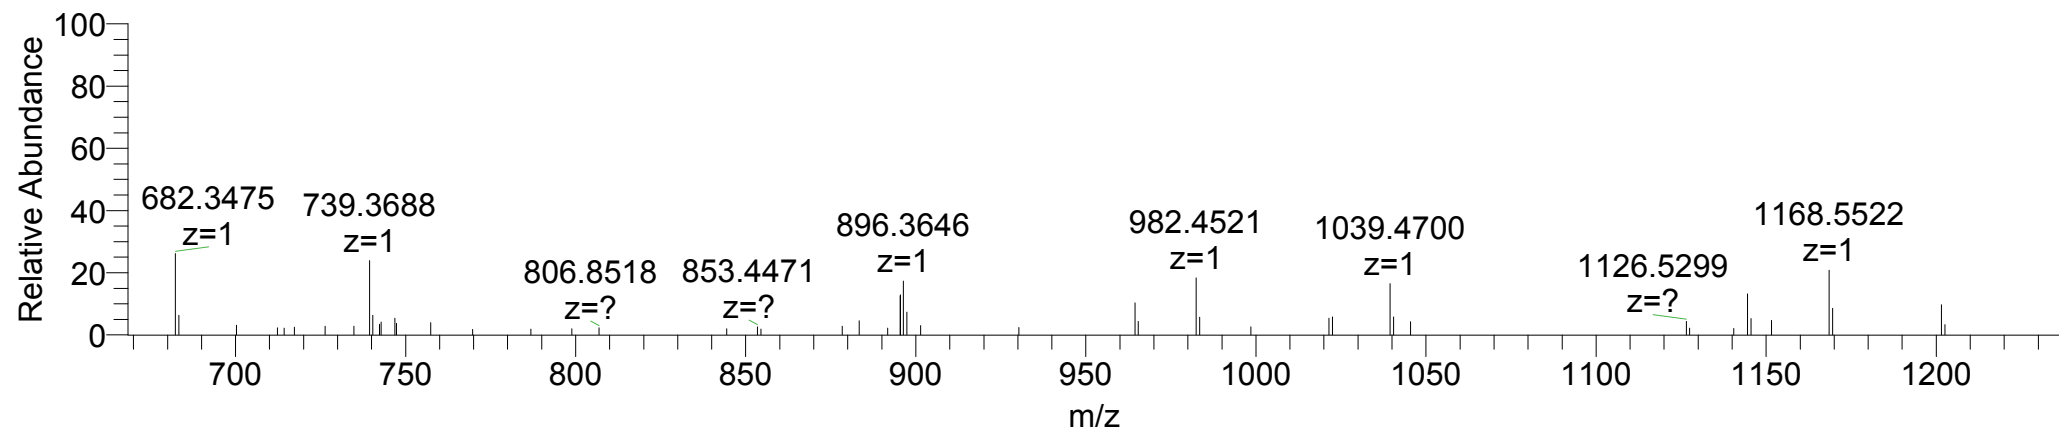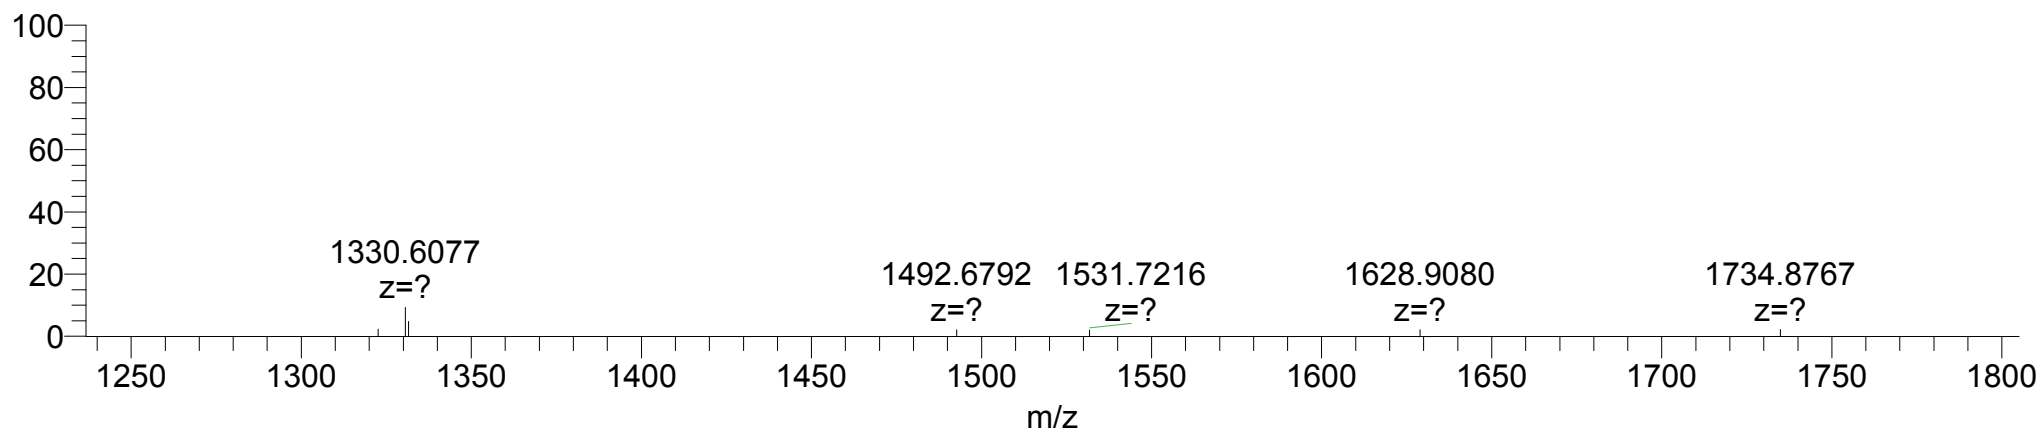

Human

15.

**P717-OH, P726-OH, P732-OH, P741-OH, K744-OH**

#709-744: GNVGPQGEPGPPGQQGNPGAQGLPGPQGAIGPPGEK

| Ion        | charge state | Theoretical m/z (mono) | Experimental m/z (mono) | Mass error (Da) | Mass error (PPM) |
|------------|--------------|------------------------|-------------------------|-----------------|------------------|
| [M+3H]+6OH | 3            | 1132.2013              | 1132.1937               | -0.0228         | -6.7             |
| y4+2OH     | 1            | 462.2195               | 462.2153                | -0.0042         | -9.1             |
| y5+2OH     | 1            | 559.2722               | 559.2675                | -0.0047         | -8.4             |
| y6+2OH     | 1            | 616.2937               | 616.2881                | -0.0056         | -9.1             |
| y13+3OH    | 2            | 626.8120               | 626.8061                | -0.0118         | -9.4             |
| b8-NH3     | 1            | 722.3104               | 722.3045                | -0.0059         | -8.2             |
| y7+2OH     | 1            | 729.3717               | 729.3708                | -0.0009         | -1.2             |
| b8         | 1            | 739.3369               | 739.3306                | -0.0063         | -8.5             |
| y9+2OH     | 1            | 857.4363               | 857.4280                | -0.0083         | -9.7             |
| y19+4OH    | 2            | 896.4472               | 896.4380                | -0.0184         | -10.3            |
| b10+OH     | 1            | 909.4061               | 909.3950                | -0.0111         | -12.2            |
| y11+2OH    | 1            | 1082.5477              | 1082.5372               | -0.0105         | -9.7             |
| y13+3OH    | 1            | 1252.6168              | 1252.6055               | -0.0113         | -9.0             |
| b17+2OH    | 1            | 1603.7095              | 1603.6925               | -0.0170         | -10.6            |

\*Unlocalized sites: P719-OH?, P720-OH?

Pseudolocalized sites: P720-OH

12\_9\_2011Col5a1\_Trypsin\_CE30\_nontrapping #5713 RT: 55.69 AV: 1 NL: 3.61E4

T: FTMS + c NSI d Full ms2 1132.86@hcd30.00 [100.00-2000.00]

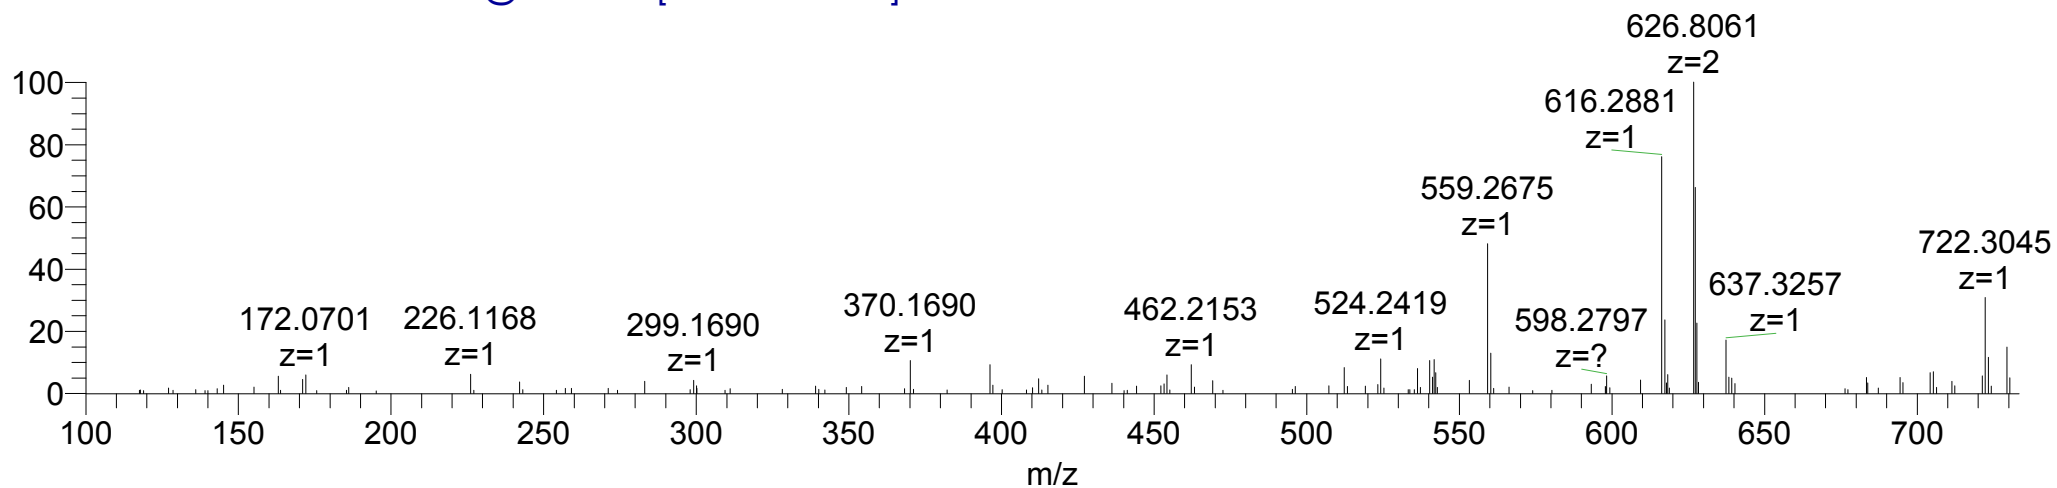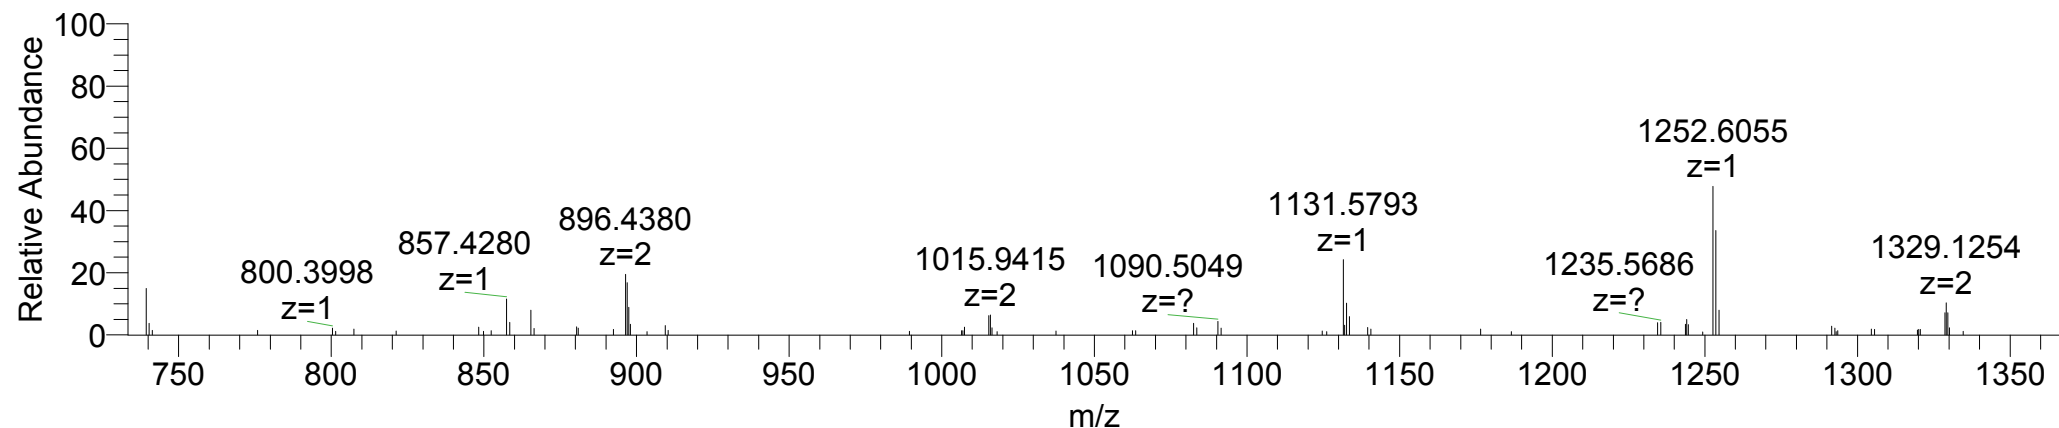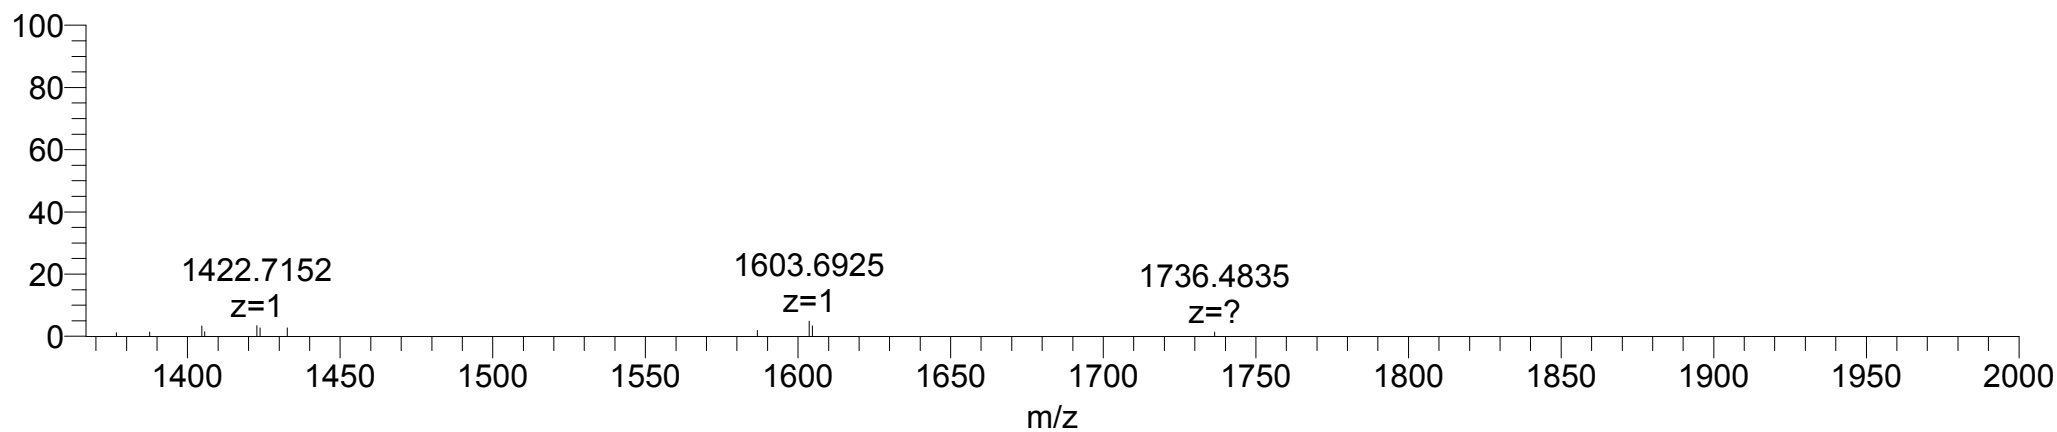

Human

16.

P750-OH, P753-OH, P756-OH, P762-OH, P765-OH

#745-767: GPLGKPGLPGMPGADGPGHPGK

| Ion         | charge state | Theoretical m/z (mono) | Experimental m/z (mono) | Mass error (Da) | Mass error (PPM) |
|-------------|--------------|------------------------|-------------------------|-----------------|------------------|
| [M+3H]+5OH  | 3            | 724.3565               | 724.3506                | -0.0177         | -8.2             |
| y2          | 1            | 204.1343               | 204.1325                | -0.0018         | -8.9             |
| b3/PLG      | 1            | 268.1656               | 268.1635                | -0.0021         | -7.9             |
| y3+OH       | 1            | 317.1819               | 317.1796                | -0.0023         | -7.3             |
| PGAD+OH     | 1            | 357.1405               | 357.1379                | -0.0026         | -7.3             |
| y7+2OH      | 2            | 361.1850               | 361.1826                | -0.0048         | -6.7             |
| y8+2OH      | 2            | 389.6958               | 389.6927                | -0.0062         | -8.0             |
| y12-H2O+3OH | 2            | 558.7570               | 558.7531                | -0.0078         | -7.0             |
| y12+3OH     | 2            | 567.7624               | 567.7582                | -0.0084         | -7.4             |
| y6+2OH      | 1            | 624.3100               | 624.3051                | -0.0049         | -7.9             |
| y7+2OH      | 1            | 721.3628               | 721.3575                | -0.0053         | -7.4             |
| b8+OH       | 1            | 736.4352               | 736.4299                | -0.0053         | -7.2             |
| y8+2OH      | 1            | 778.3842               | 778.3777                | -0.0065         | -8.4             |
| y18+5OH     | 2            | 859.8938               | 859.8871                | -0.0134         | -7.8             |
| b10+2OH     | 1            | 906.5043               | 906.4985                | -0.0058         | -6.4             |
| y11+2OH     | 1            | 1021.4697              | 1021.4609               | -0.0088         | -8.6             |
| b11+2OH     | 1            | 1037.5448              | 1037.5378               | -0.0070         | -6.8             |
| y12+3OH     | 1            | 1134.5174              | 1134.5095               | -0.0079         | -7.0             |

12\_9\_2011Col5a1\_Trypsin\_CE30\_nontrapping #5040 RT: 49.85 AV: 1 NL: 1.73E5

T: FTMS + c NSI d Full ms2 724.68@hcd30.00 [100.00-2000.00]

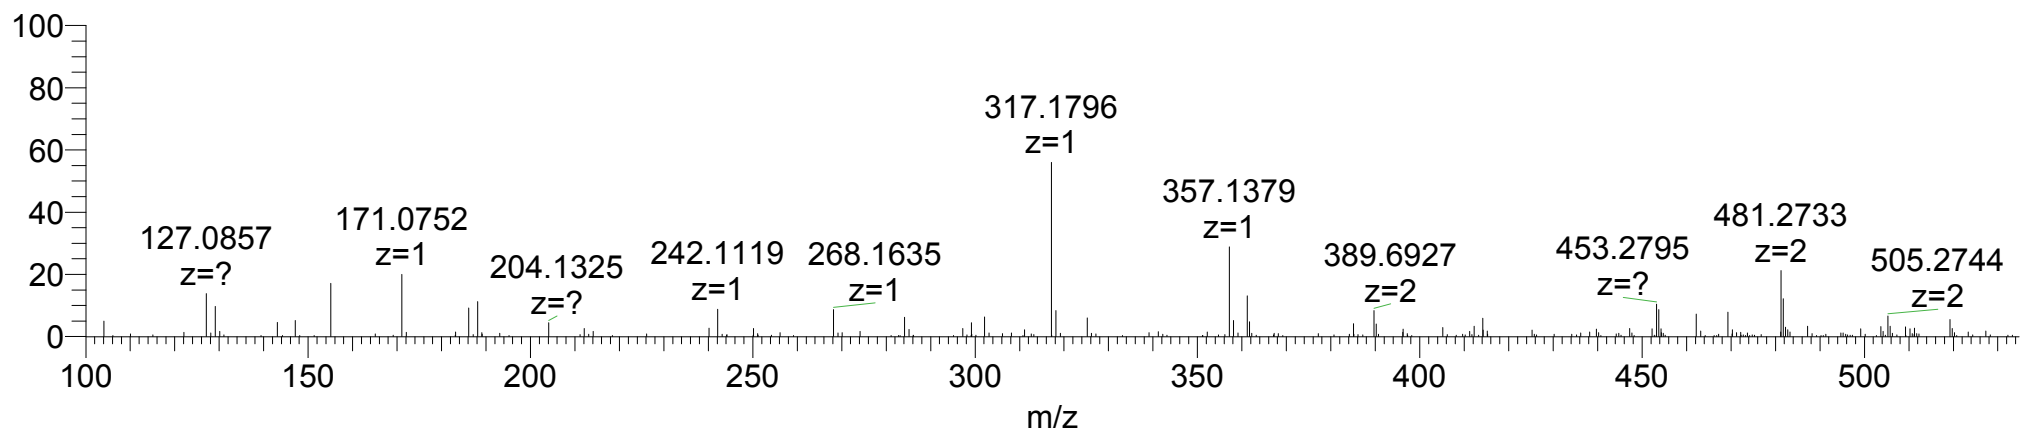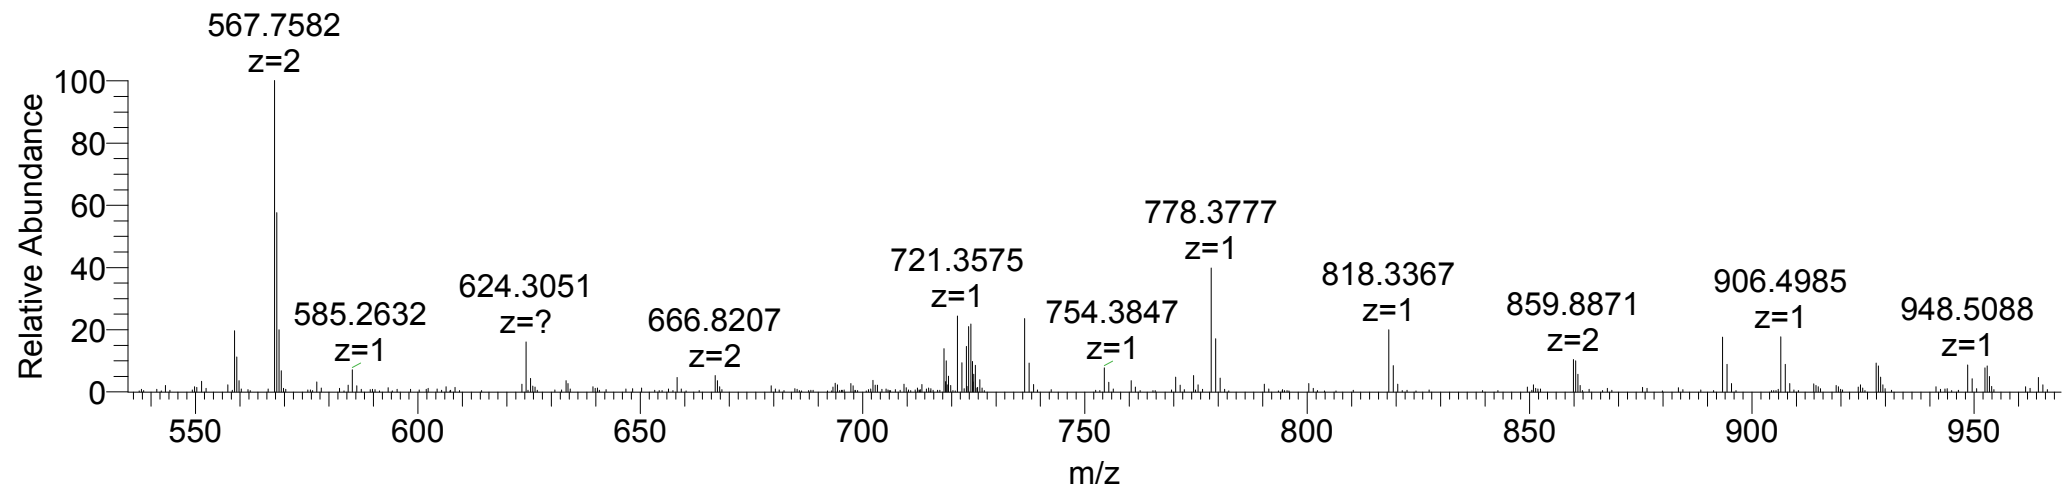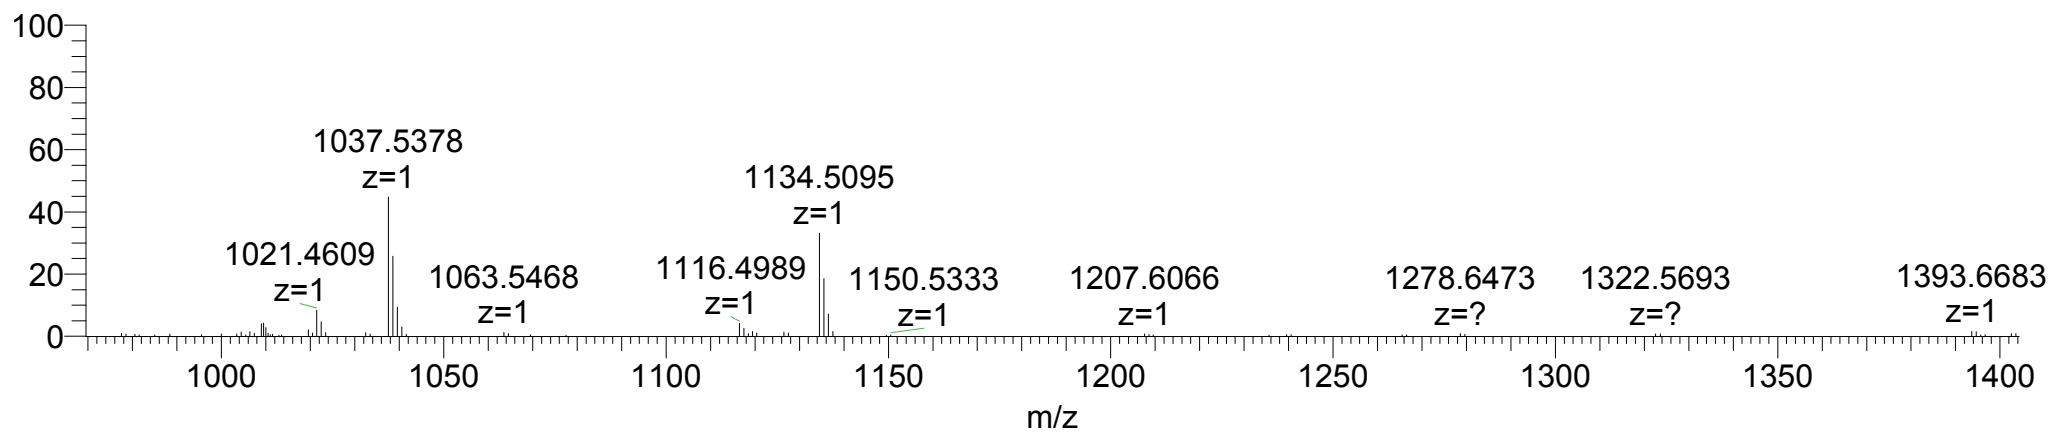

Human

17.

**K774-OH.Gal.Glc, P780-OH, P789-OH**

#768-792: EGPPGEKGGQGPPGPQGPIGYPGPR

| Ion                       | charge state | Theoretical m/z (mono) | Experimental m/z (mono) | Mass error (Da) | Mass error (PPM) |
|---------------------------|--------------|------------------------|-------------------------|-----------------|------------------|
| [M+3H]+4OH+Gal.Glc        | 3            | 924.4263               | 924.4192                | -0.0213         | -7.7             |
| GP-28                     | 1            | 127.0866               | 127.0857                | -0.0009         | -7.1             |
| PQ                        | 1            | 226.1186               | 226.1168                | -0.0018         | -8.0             |
| PGP+OH                    | 1            | 268.1292               | 268.1272                | -0.0020         | -7.5             |
| y2                        | 1            | 272.1717               | 272.1700                | -0.0017         | -6.3             |
| GQGPP-28+OH/<br>y4-NH3+OH | 1            | 425.2143               | 425.2110                | -0.0033         | -7.8             |
| y4+OH                     | 1            | 442.2409               | 442.2369                | -0.0040         | -9.1             |
| PPGPQ+OH                  | 1            | 493.2405               | 493.2385                | -0.0020         | -4.1             |
| PPGEK+2OH                 | 1            | 541.2617               | 541.2584                | -0.0033         | -6.1             |
| y5+OH                     | 1            | 605.3042               | 605.2993                | -0.0049         | -8.1             |
| y6+OH                     | 1            | 662.3257               | 662.3204                | -0.0053         | -8.0             |
| y13+2OH                   | 2            | 662.8359               | 662.8297                | -0.0124         | -9.4             |
| y14+2OH                   | 2            | 711.3622               | 711.3569                | -0.0106         | -7.5             |
| y7+OH                     | 1            | 775.4097               | 775.4053                | -0.0044         | -5.7             |
| y8+OH                     | 1            | 872.4625               | 872.4551                | -0.0074         | -8.5             |
| y9+OH                     | 1            | 929.4839               | 929.4761                | -0.0078         | -8.4             |
| y10-NH3+OH                | 1            | 1040.5160              | 1040.5070               | -0.0090         | -8.7             |
| y10+OH                    | 1            | 1057.5425              | 1057.5356               | -0.0069         | -6.5             |
| y11+OH                    | 1            | 1154.5953              | 1154.5894               | -0.0059         | -5.1             |
| y12+OH                    | 1            | 1211.6167              | 1211.6073               | -0.0094         | -7.8             |
| y13+2OH                   | 1            | 1324.6644              | 1324.6542               | -0.0102         | -7.7             |
| y14+2OH                   | 1            | 1421.7172              | 1421.7119               | -0.0053         | -3.7             |
| y15+2OH                   | 1            | 1478.7387              | 1478.7338               | -0.0049         | -3.3             |

\*Unlocalized sites: P770-OH?, P771-OH?

Pseudolocalized sites: P771-OH

12\_9\_2011Col5a1\_Trypsin\_CE40 #2176 RT: 20.69 AV: 1 NL: 6.20E4

T: FTMS + c NSI d Full ms2 924.75@hcd40.00 [100.00-2000.00]

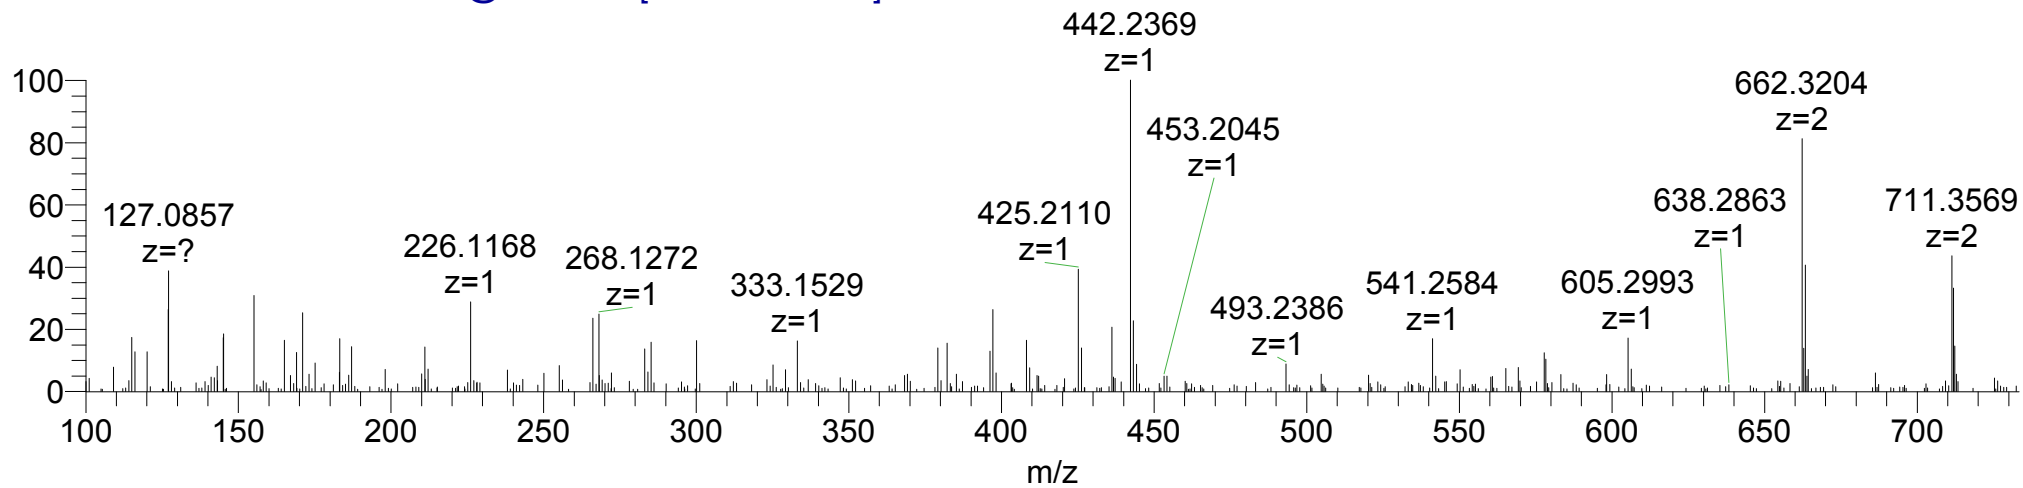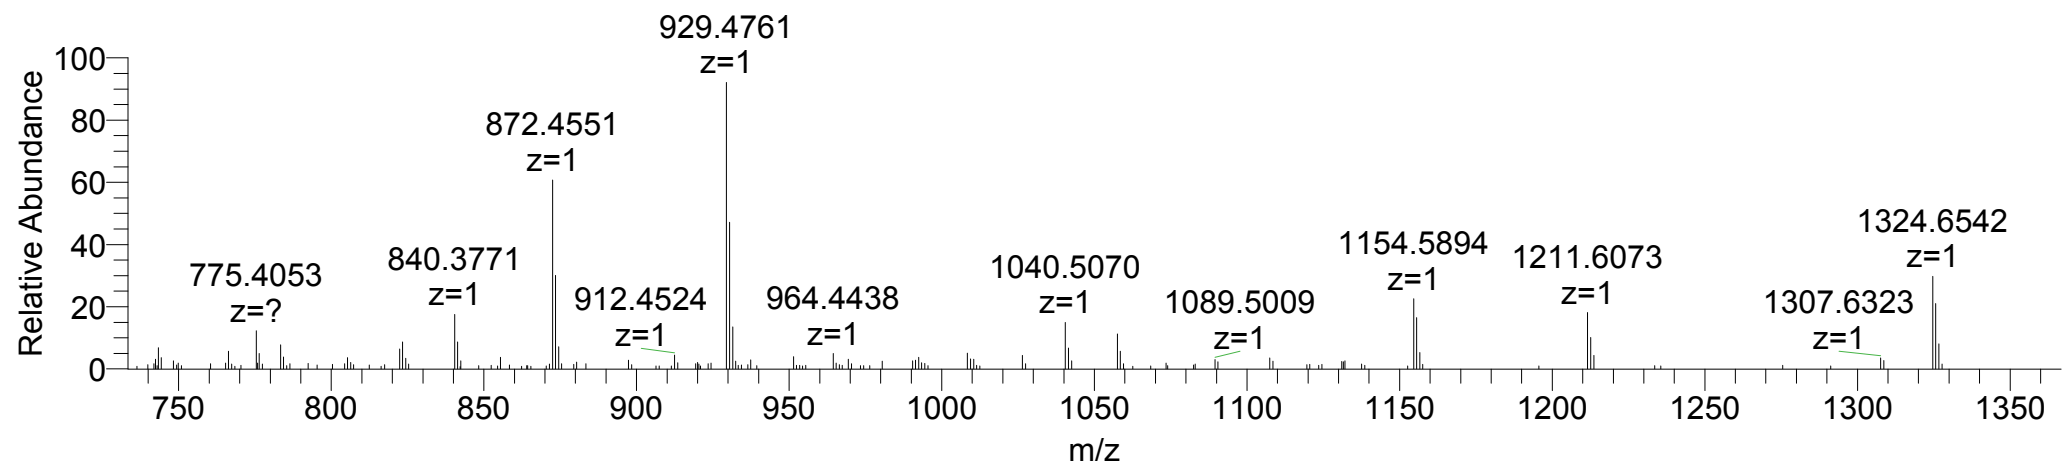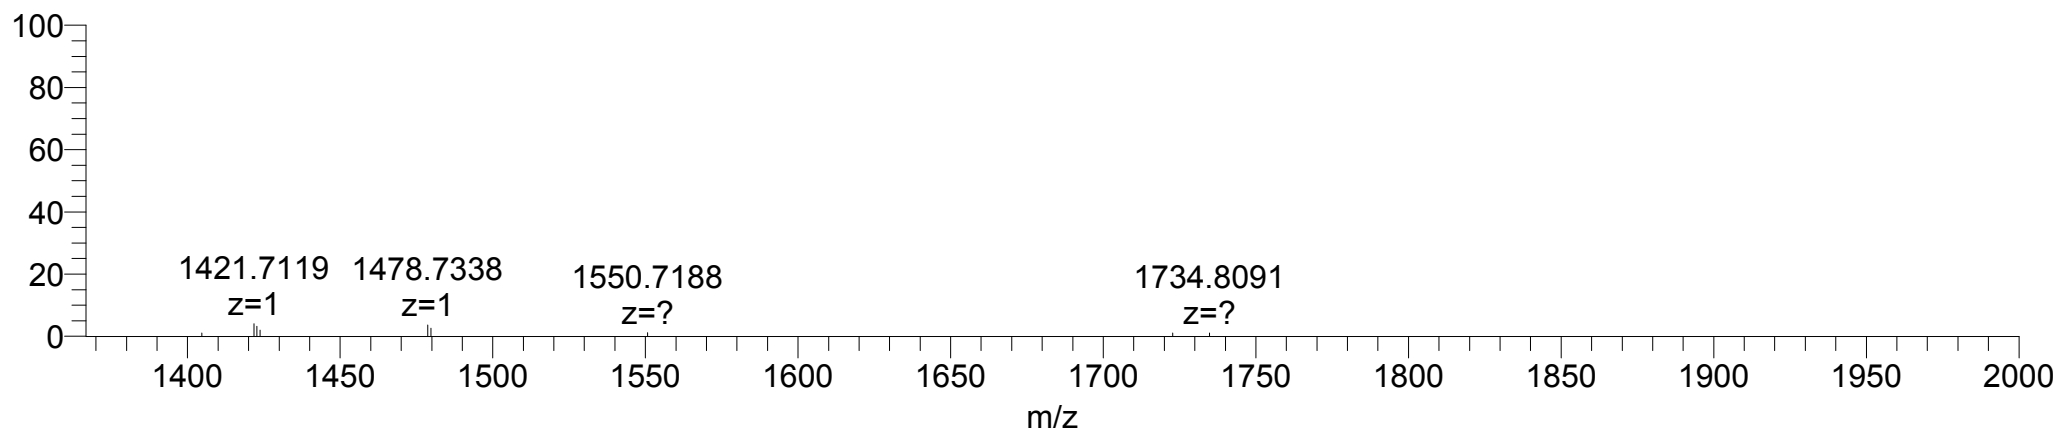



Human

18.

**K795-OH.Gal.Glc**

#793-801: GVKGADGIR

| Ion               | charge state | Theoretical m/z (mono) | Experimental m/z (mono) | Mass error (Da) | Mass error (PPM) |
|-------------------|--------------|------------------------|-------------------------|-----------------|------------------|
| [M+3H]+OH+Gal.Glc | 3            | 404.8700               | 404.8701                | 0.0003          | 0.2              |
| y1                | 1            | 175.1190               | 175.1196                | 0.0006          | 3.4              |
| y3                | 1            | 345.2245               | 345.2256                | 0.0011          | 3.2              |
| y7+OH             | 2            | 366.7036               | 366.7045                | 0.0018          | 2.5              |
| [M+2H]-H2O+OH     | 2            | 435.7432               | 435.7449                | 0.0034          | 3.9              |
| [M+2H]+OH         | 2            | 444.7485               | 444.7500                | 0.0030          | 3.4              |
| y4                | 1            | 460.2514               | 460.2531                | 0.0017          | 3.7              |
| y5                | 1            | 531.2885               | 531.2902                | 0.0017          | 3.2              |
| y6-H2O            | 1            | 570.2994               | 570.3021                | 0.0027          | 4.7              |
| y6                | 1            | 588.3100               | 588.3118                | 0.0018          | 3.1              |
| y7+OH             | 1            | 732.3999               | 732.4021                | 0.0022          | 3.0              |
| [M+H]+OH          | 1            | 888.4898               | 888.4907                | 0.0009          | 1.0              |

9\_22\_2011CollagenTrypsin\_HCD\_1 #522 RT: 7.17 AV: 1 NL: 5.84E4

T: FTMS + c NSI d Full ms2 404.87@hcd30.00 [115.00-1225.00]

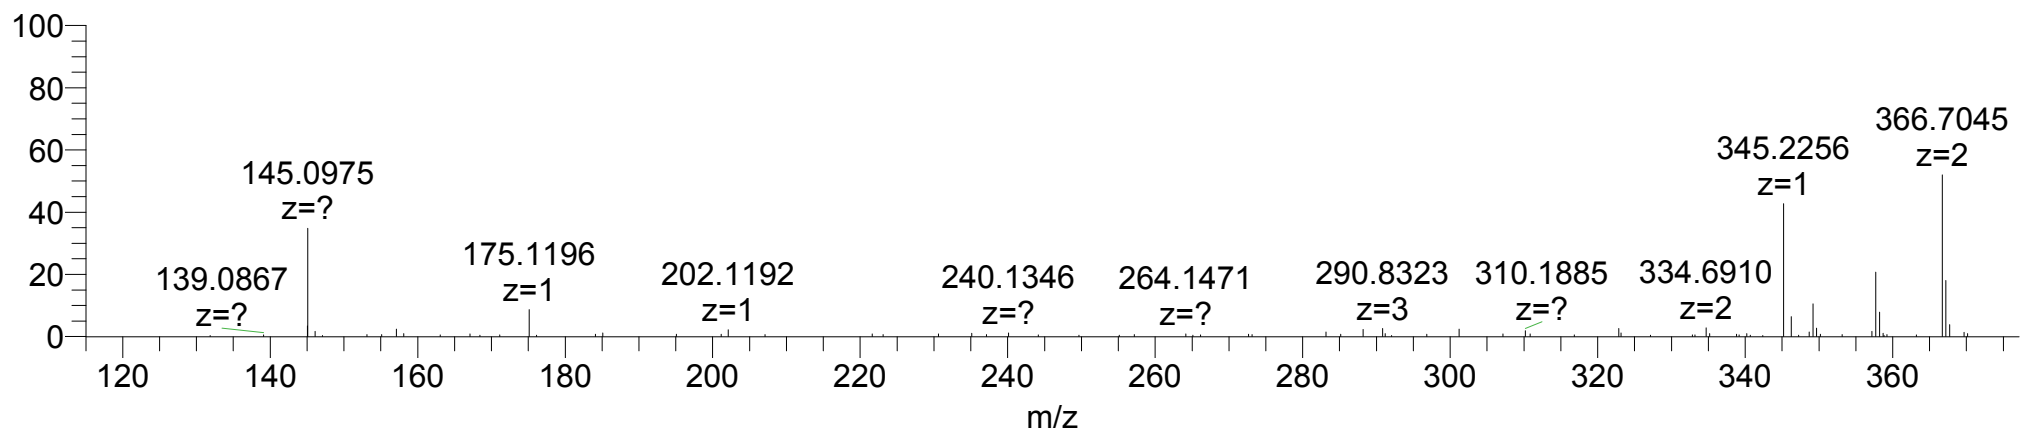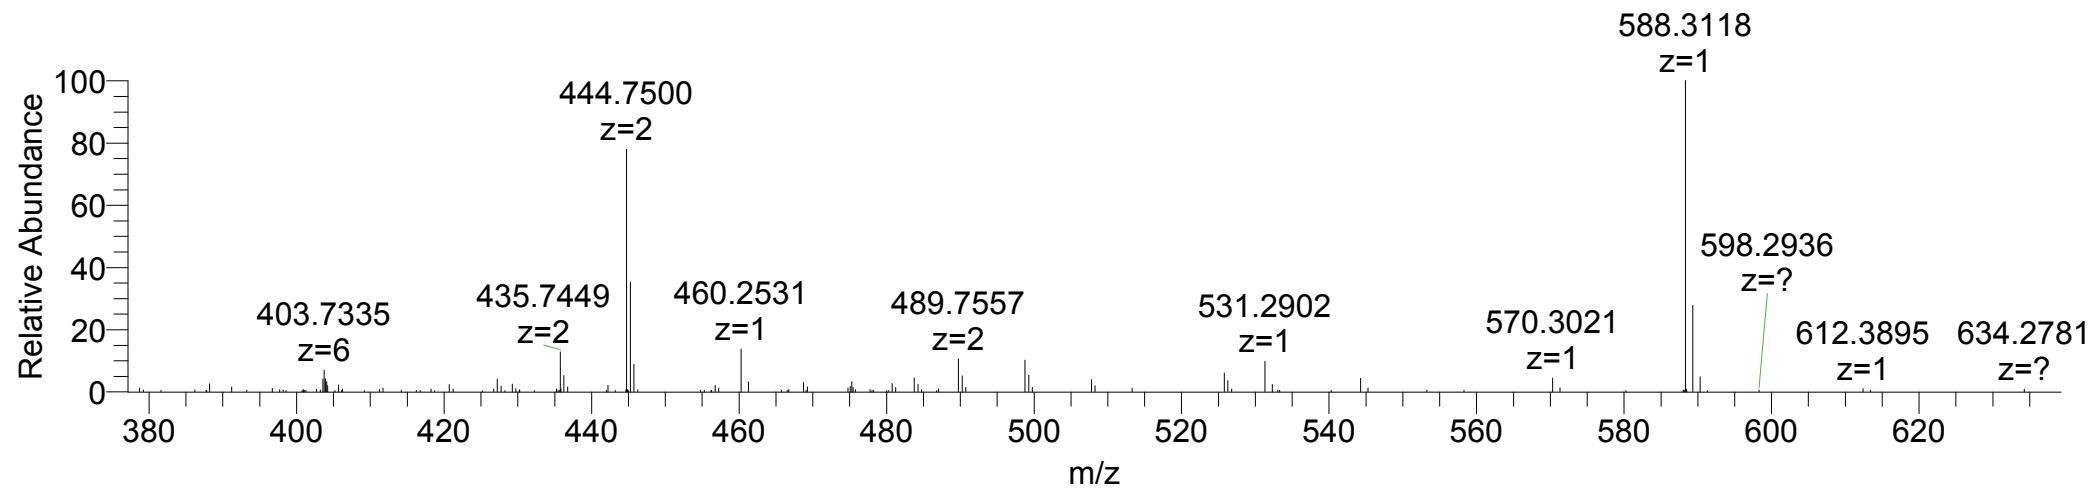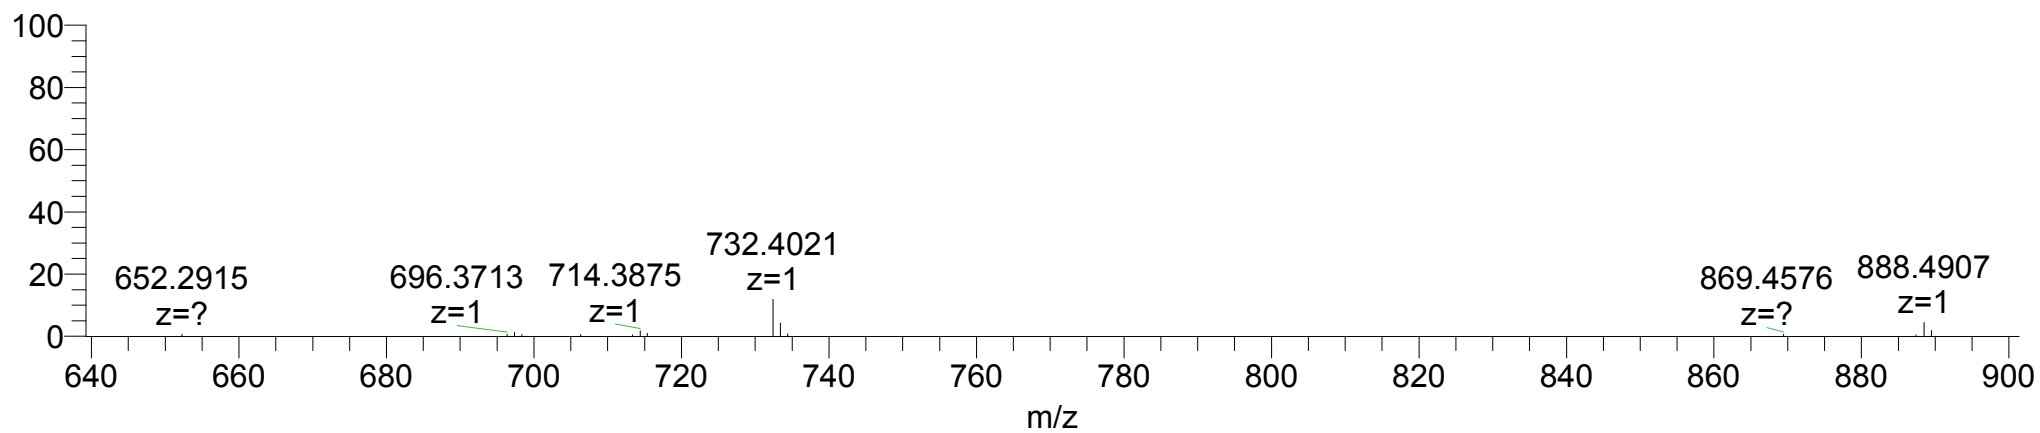

Human

19.

**K810-OH.Gal.Glc, P816-OH, K819-OH.Gal.Glc, K825-OH.Gal.Glc**

#808-828: GEKGEDGFPGFKGDMGIKGDR

| Ion                 | charge state | Theoretical m/z (mono) | Experimental m/z (mono) | Mass error (Da) | Mass error (PPM) |
|---------------------|--------------|------------------------|-------------------------|-----------------|------------------|
| [M+4H]+4OH+3Gal.Glc | 4            | 809.0882               | 809.0820                | -0.0248         | -7.7             |
| y1                  | 1            | 175.1190               | 175.1179                | -0.0011         | -6.3             |
| y3                  | 1            | 347.1674               | 347.1653                | -0.0021         | -6.1             |
| y7+OH               | 2            | 396.7053               | 396.7029                | -0.0048         | -6.1             |
| y4+OH               | 1            | 491.2572               | 491.2541                | -0.0031         | -6.3             |
| y10+2OH             | 1            | 554.7744               | 554.7716                | -0.0028         | -5.1             |
| y6+OH               | 1            | 661.3628               | 661.3577                | -0.0051         | -7.7             |
| y13+3OH             | 2            | 713.3432               | 713.3381                | -0.0102         | -7.2             |
| y7+OH               | 1            | 792.4032               | 792.3981                | -0.0051         | -6.4             |
| y8+OH               | 1            | 907.4302               | 907.4261                | -0.0041         | -4.5             |
| y9+OH               | 1            | 964.4517               | 964.4455                | -0.0062         | -6.4             |
| y10+2OH             | 1            | 1108.5415              | 1108.5354               | -0.0061         | -5.5             |
| y13+3OH             | 1            | 1425.6791              | 1425.6708               | -0.0083         | -5.8             |

12\_9\_2011Col5a1\_Trypsin\_CE40 #2314 RT: 21.86 AV: 1 NL: 5.57E4

T: FTMS + c NSI d Full ms2 809.08@hcd40.00 [100.00-2000.00]

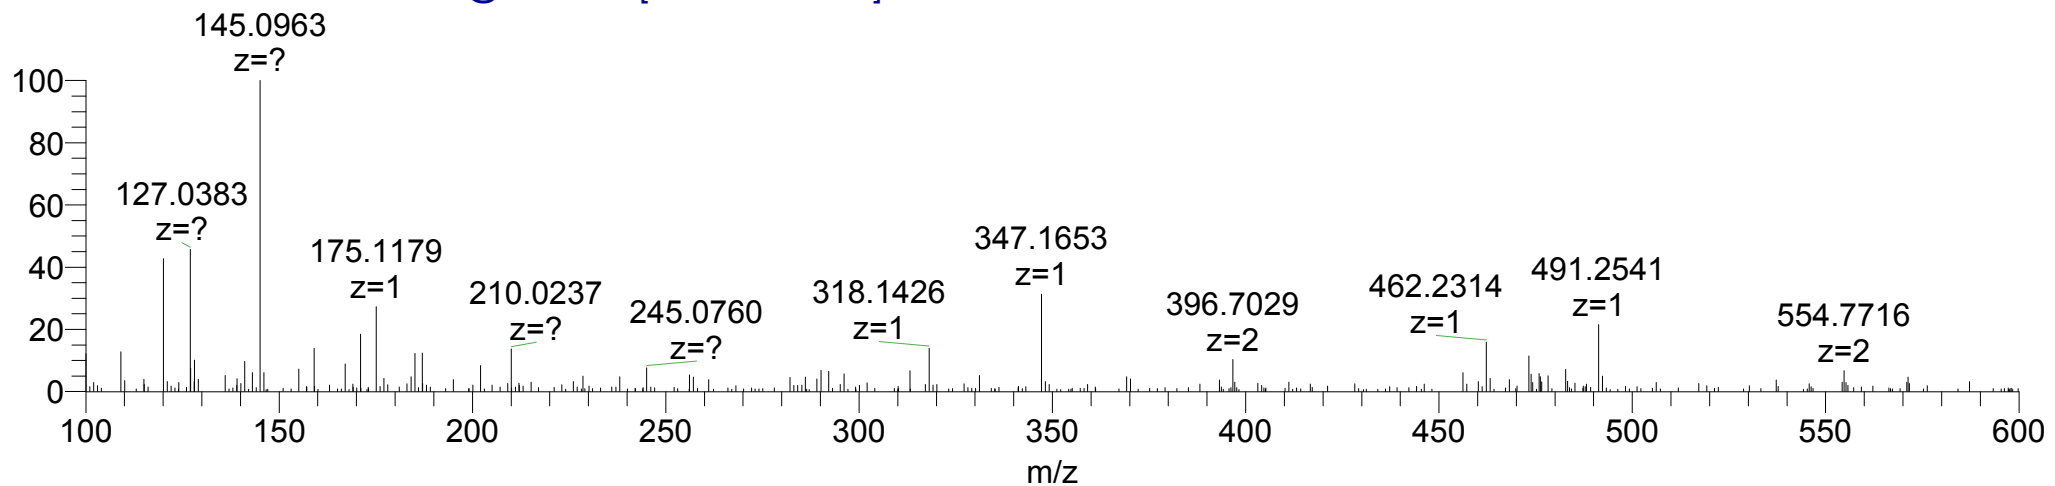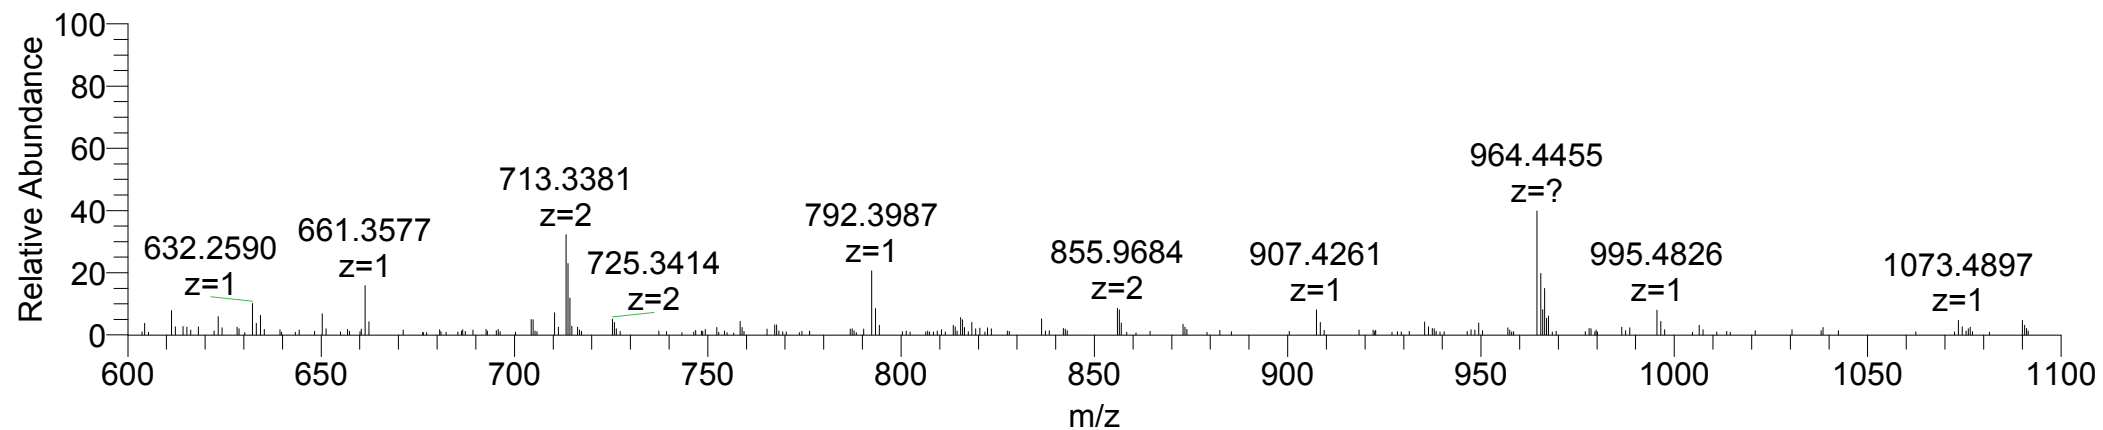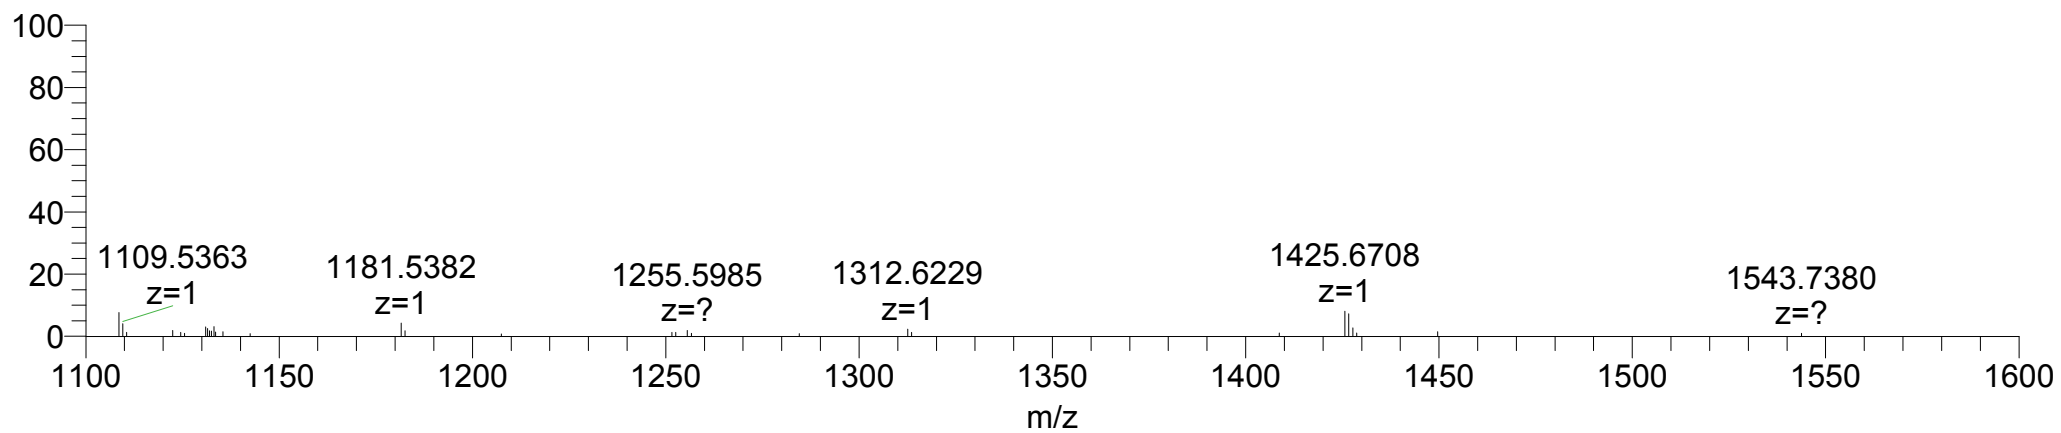

Human

20.

P833-OH, P834-OH, K846-OH.Gal.Glc

#829-848: GEIGPPGPRGEDGPEGPKGR

| Ion                | charge state | Theoretical m/z (mono) | Experimental m/z (mono) | Mass error (Da) | Mass error (PPM) |
|--------------------|--------------|------------------------|-------------------------|-----------------|------------------|
| [M+4H]+3OH+Gal.Glc | 4            | 583.5200               | 583.5144                | -0.0224         | -9.6             |
| GE-28              | 1            | 159.0764               | 159.0756                | -0.0008         | -5.1             |
| GE/b2              | 1            | 187.0713               | 187.0703                | -0.0010         | -5.4             |
| b4                 | 1            | 357.1769               | 357.1744                | -0.0025         | -7.0             |
| y8+OH              | 2            | 407.2143               | 407.2123                | -0.0040         | -4.9             |
| y16+3OH            | 3            | 550.9325               | 550.9297                | -0.0084         | -5.1             |
| y17+3OH            | 3            | 569.9397               | 569.9368                | -0.0087         | -5.1             |
| y18+3OH            | 3            | 607.6344               | 607.6310                | -0.0102         | -5.6             |
| y14+OH             | 2            | 712.8475               | 712.8446                | -0.0058         | -4.1             |
| y15+2OH            | 2            | 769.3713               | 769.3658                | -0.0110         | -7.2             |
| y8+OH              | 1            | 813.4213               | 813.4161                | -0.0052         | -6.4             |
| y16+3OH            | 2            | 825.8952               | 825.8911                | -0.0082         | -5.0             |
| y17+3OH            | 2            | 854.4059               | 854.4008                | -0.0102         | -6.0             |
| y18+3OH            | 2            | 910.9479               | 910.9422                | -0.0114         | -6.3             |
| y17+3OH+Gal        | 2            | 935.4323               | 935.4269                | -0.0108         | -5.8             |
| y18+3OH+Gal        | 2            | 991.9743               | 991.9700                | -0.0086         | -4.3             |

12\_9\_2011Col5a1\_ArgC\_3 #1260 RT: 12.67 AV: 1 NL: 1.60E5

T: FTMS + c NSI d Full ms2 583.77@hcd30.00 [100.00-2000.00]

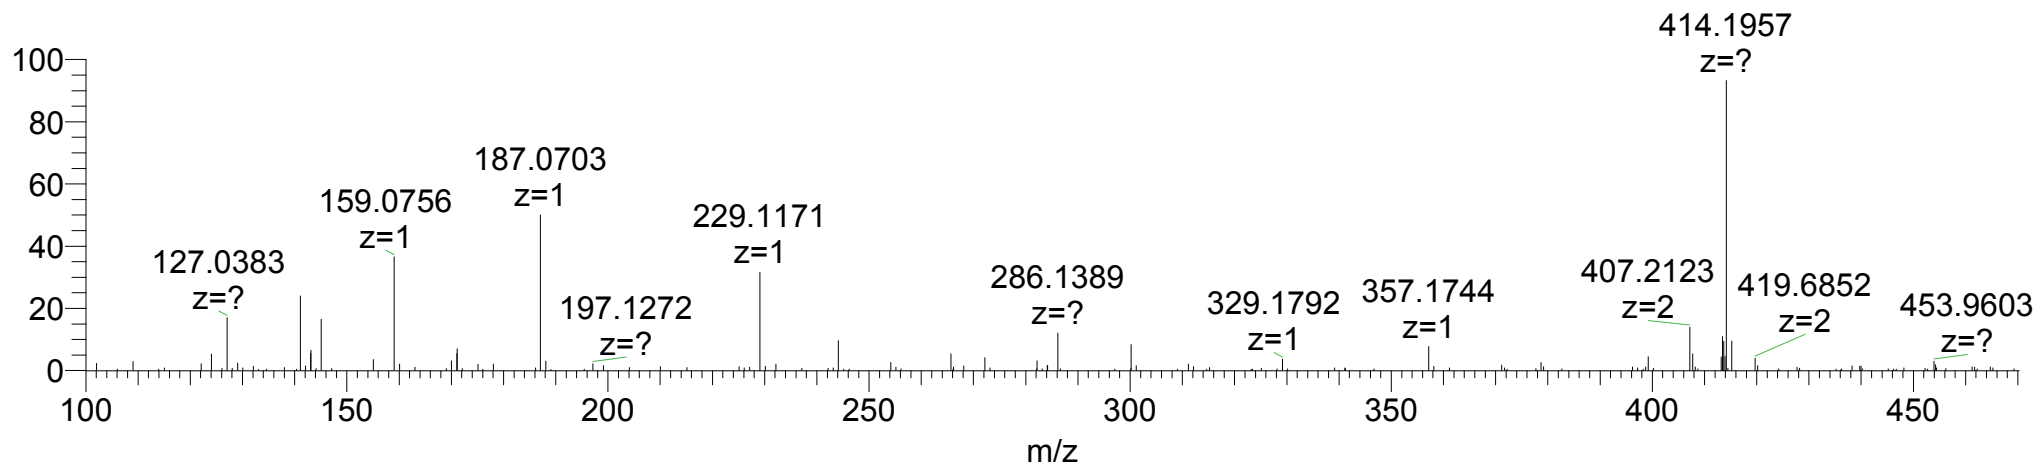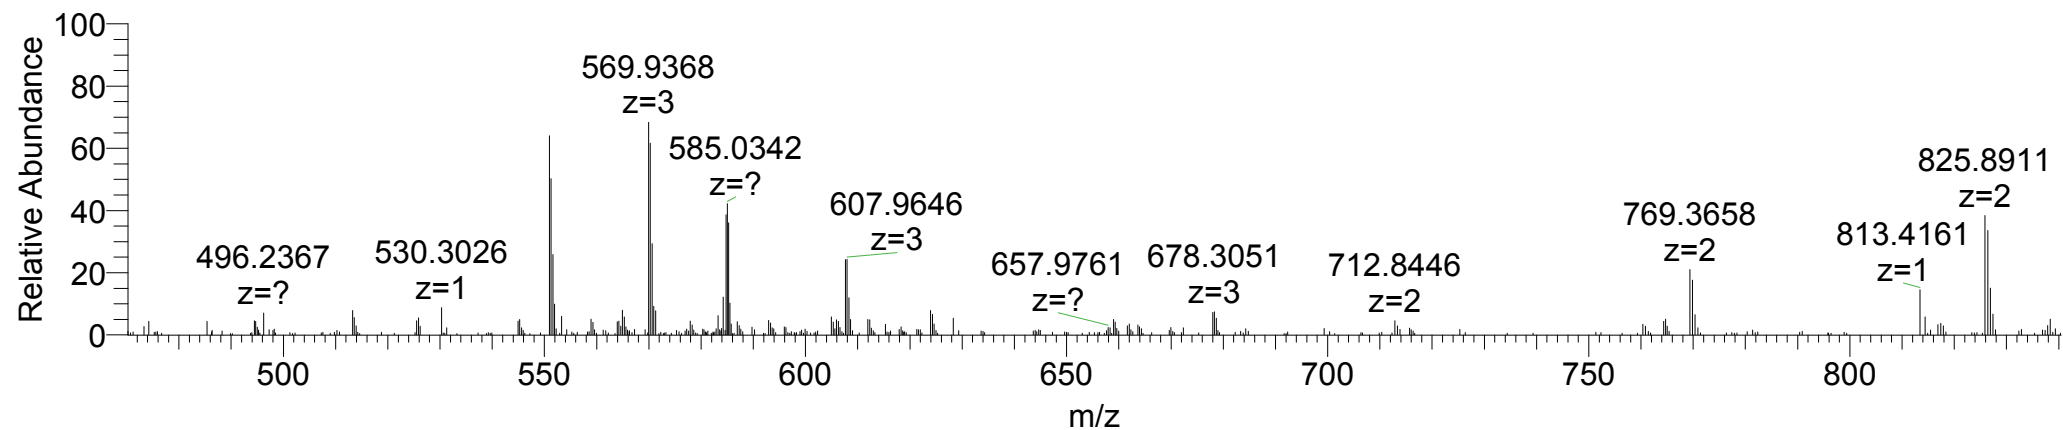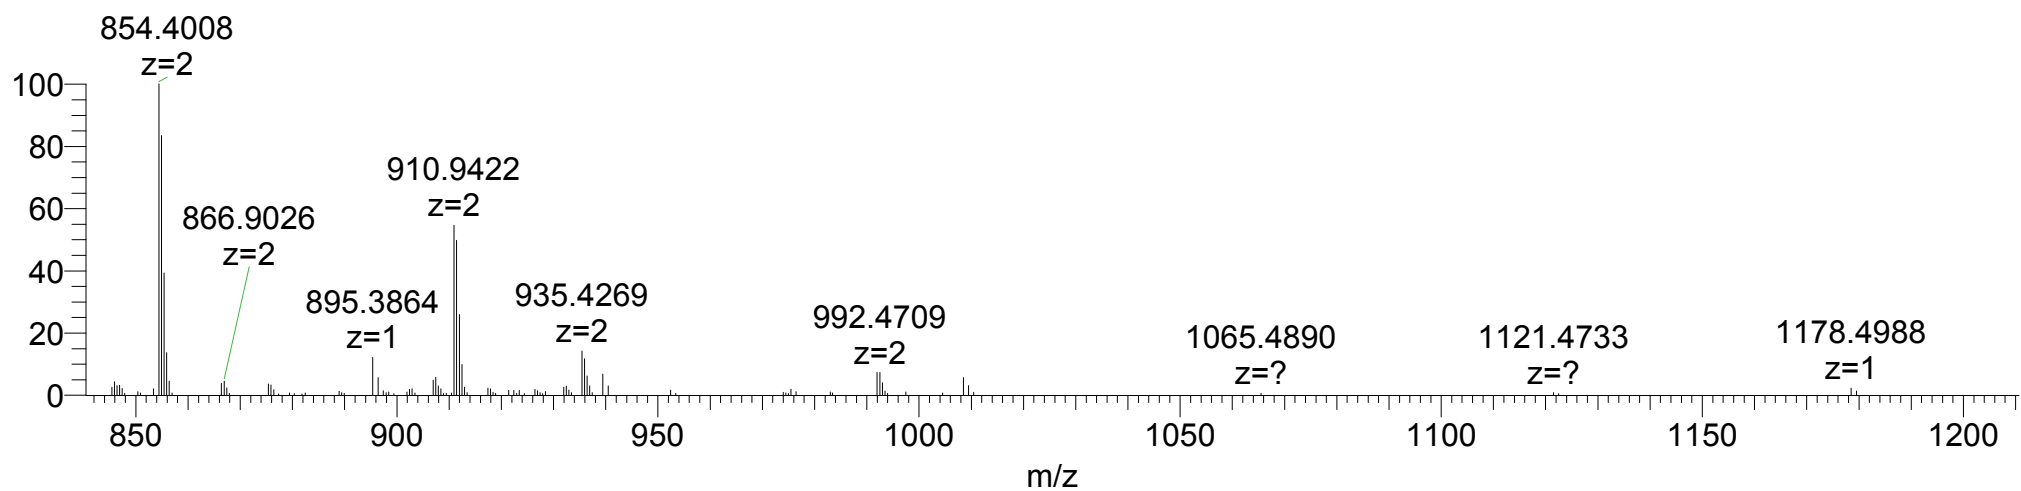

Human

21.

P855-OH

#849-866: GGPNGDPGPLGPPGEK GK

| Ion                | charge state | Theoretical m/z (mono) | Experimental m/z (mono) | Mass error (Da) | Mass error (PPM) |
|--------------------|--------------|------------------------|-------------------------|-----------------|------------------|
| [M+3H]+3OH+Gal.Glc | 3            | 668.3078               | 668.3015                | -0.0189         | -9.4             |
| b3/PN              | 1            | 212.1030               | 212.1014                | -0.0016         | -7.6             |
| a4-NH3             | 1            | 281.1244               | 281.1225                | -0.0019         | -6.8             |
| b4-NH3             | 1            | 309.1193               | 309.1168                | -0.0025         | -8.1             |
| b4/GPNG            | 1            | 326.1459               | 326.1399                | -0.0060         | -18.5            |
| y7+2OH             | 2            | 372.6980               | 372.6952                | -0.0056         | -7.5             |
| y8+2OH             | 2            | 401.2087               | 401.2059                | -0.0056         | -7.0             |
| b6-H2O-NH3         | 1            | 463.1572               | 463.1534                | -0.0038         | -8.2             |
| b6                 | 1            | 498.1943               | 498.1905                | -0.0038         | -7.6             |
| y10+2OH            | 2            | 506.2771               | 506.2725                | -0.0092         | -9.1             |
| y16+3OH            | 3            | 522.2582               | 522.2541                | -0.0123         | -7.9             |
| y12+3OH            | 2            | 591.3117               | 591.3071                | -0.0092         | -7.8             |
| y6+2OH             | 1            | 647.3359               | 647.3311                | -0.0048         | -7.4             |
| b8+OH              | 1            | 668.2634               | 668.2543                | -0.0091         | -13.6            |
| y14+3OH            | 2            | 677.3359               | 677.3304                | -0.0110         | -8.1             |
| y15+3OH            | 2            | 734.3573               | 734.3505                | -0.0136         | -9.3             |
| y7+2OH             | 1            | 744.3886               | 744.3827                | -0.0059         | -7.9             |
| y16+3OH            | 2            | 782.8837               | 782.8775                | -0.0124         | -7.9             |
| y8+2OH             | 1            | 801.4101               | 801.4042                | -0.0059         | -7.4             |
| [M+2H]+3OH         | 2            | 839.9052               | 839.8974                | -0.0156         | -9.3             |
| b10+OH             | 1            | 878.4003               | 878.3922                | -0.0081         | -9.2             |
| b11+OH             | 1            | 935.4217               | 935.4146                | -0.0071         | -7.6             |
| y12+3OH            | 1            | 1181.6161              | 1181.6071               | -0.0090         | -7.6             |

\*Unlocalized sites: P861-OH?, K864-OH.Gal.Glc?, K866-OH.Gal.Glc

Pseudolocalized sites: P861-OH, K864-OH.Gal.Glc

12\_9\_2011Col5a1\_Trypsin\_CE30 #1129 RT: 12.00 AV: 1 NL: 1.41E5

T: FTMS + c NSI d Full ms2 669.30@hcd30.00 [100.00-2000.00]

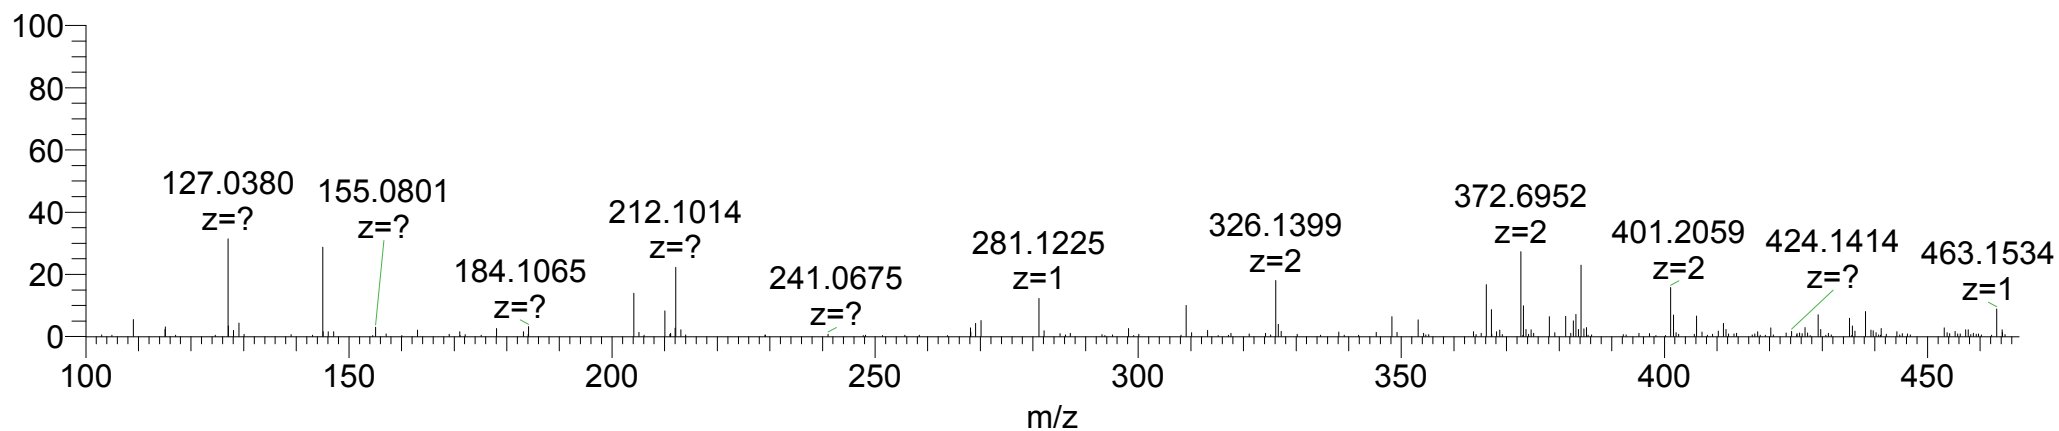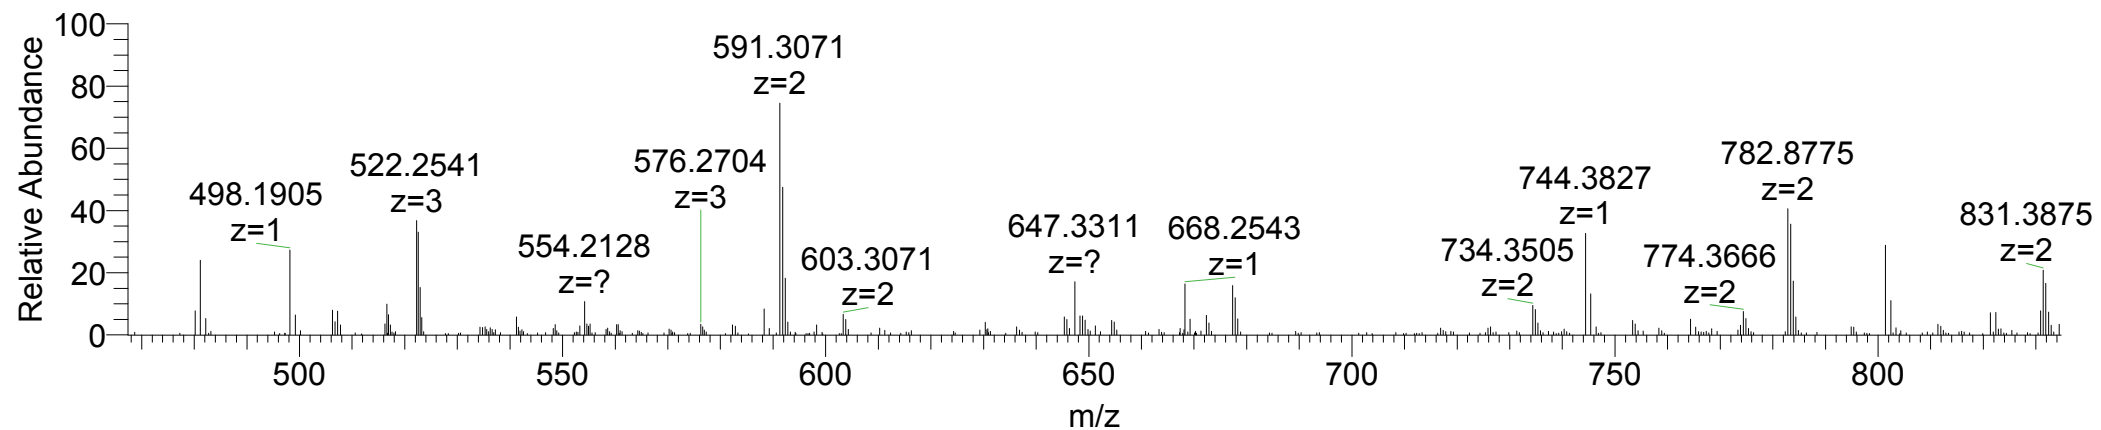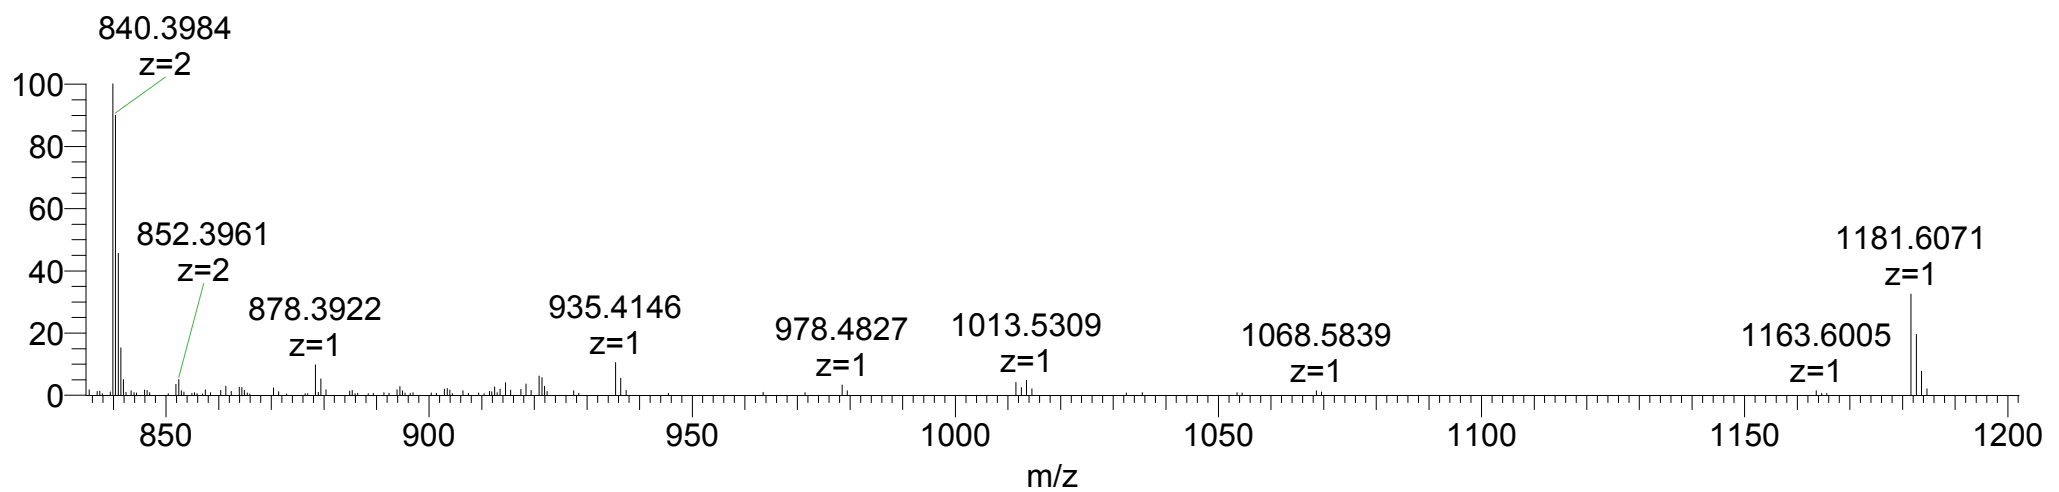



Human

**22.**

**P870-OH, P873-OH, P876-OH**

#867-878: LGVPGLPGYPGR

| Ion            | charge state | Theoretical m/z (mono) | Experimental m/z (mono) | Mass error (Da) | Mass error (PPM) |
|----------------|--------------|------------------------|-------------------------|-----------------|------------------|
| [M+2H]+3OH     | 2            | 615.8275               | 615.8218                | -0.0114         | -9.3             |
| y3+OH          | 1            | 345.1881               | 345.1852                | -0.0029         | -8.4             |
| b5+OH/GVPGL+OH | 1            | 440.2504               | 440.2468                | -0.0036         | -8.2             |
| y9+3OH         | 2            | 481.2405               | 481.2367                | -0.0076         | -7.9             |
| y10+3OH        | 2            | 530.7747               | 530.7693                | -0.0108         | -10.2            |
| b6+OH          | 1            | 553.3344               | 553.3292                | -0.0052         | -9.4             |
| y6+2OH         | 1            | 678.3206               | 678.3140                | -0.0066         | -9.7             |
| y7+2OH         | 1            | 791.4046               | 791.3969                | -0.0077         | -9.7             |
| b9+2OH         | 1            | 886.4669               | 886.4601                | -0.0068         | -7.7             |
| y9+3OH         | 1            | 961.4738               | 961.4647                | -0.0091         | -9.5             |

12\_9\_2011Col5a1\_Trypsin\_target\_MS3 #2575 RT: 31.83 AV: 1 NL: 1.27E6

T: FTMS + c NSI d Full ms2 615.82@cid35.00 [155.00-1245.00]

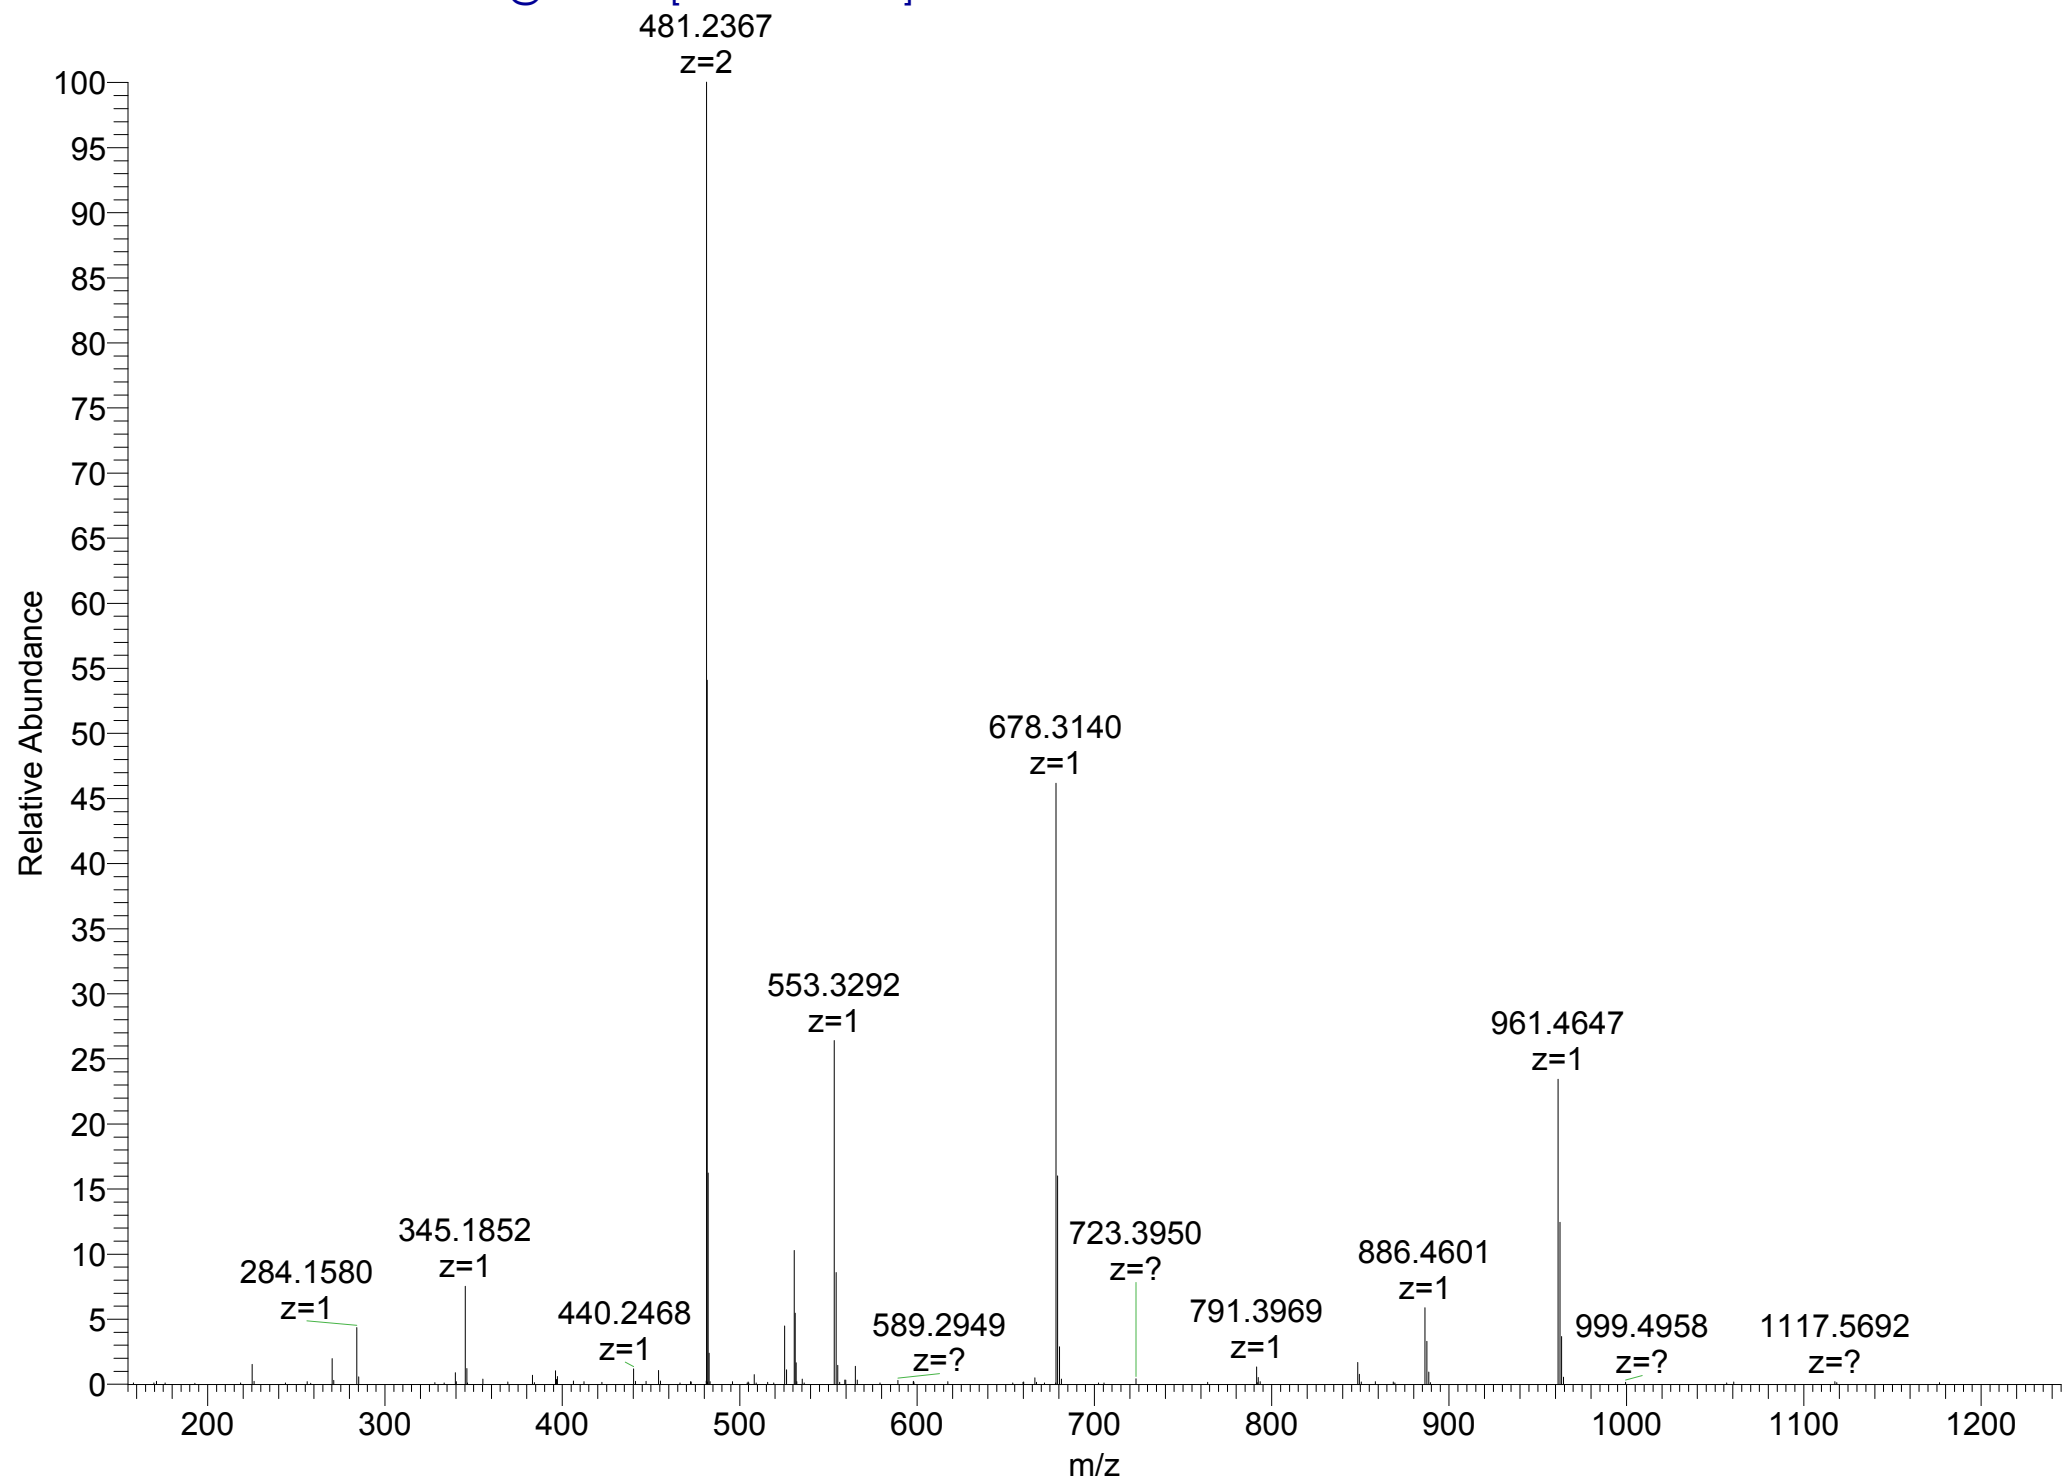

Human

23.

K882-OH.Gal.Glc, P888-OH, P891-OH, K897-OH.Gal.Glc

#879-900: QGPKSGIGFPGFPPGANGEKGGR

| Ion                 | charge state | Theoretical m/z (mono) | Experimental m/z (mono) | Mass error (Da) | Mass error (PPM) |
|---------------------|--------------|------------------------|-------------------------|-----------------|------------------|
| [M+4H]+4OH+2Gal.Glc | 4            | 707.5714               | 707.5703                | -0.0044         | -1.6             |
| F                   | 1            | 120.0808               | 120.0805                | -0.0003         | -2.5             |
| PG+OH               | 1            | 171.0764               | 171.0761                | -0.0003         | -1.8             |
| PGF+OH/GFP+OH       | 1            | 318.1448               | 318.1443                | -0.0005         | -1.6             |
| y13+3OH             | 3            | 431.2057               | 431.2039                | -0.0054         | -4.2             |
| y10-NH3+2OH         | 2            | 479.2229               | 479.2244                | 0.0030          | 3.1              |
| y10+2OH             | 2            | 487.7361               | 487.7348                | -0.0026         | -2.7             |
| y6+OH               | 1            | 619.3158               | 619.3142                | -0.0016         | -2.6             |
| y13+3OH             | 2            | 646.3049               | 646.3032                | -0.0034         | -2.6             |
| y7+OH               | 1            | 733.3587               | 733.3580                | -0.0007         | -1.0             |
| b9+OH               | 1            | 888.4574               | 888.4548                | -0.0026         | -2.9             |
| y10+2OH             | 1            | 974.4650               | 974.4625                | -0.0025         | -2.6             |
| y13                 | 1            | 1291.6062              | 1291.5977               | -0.0085         | -6.6             |

10\_7\_2011Collagen\_Trypsin\_HCDandETD\_111009033323 #3471 RT: 24.64 AV: 1 NL: 3.79E4

T: FTMS + c NSI d Full ms2 707.82@hcd35.00 [100.00-2000.00]

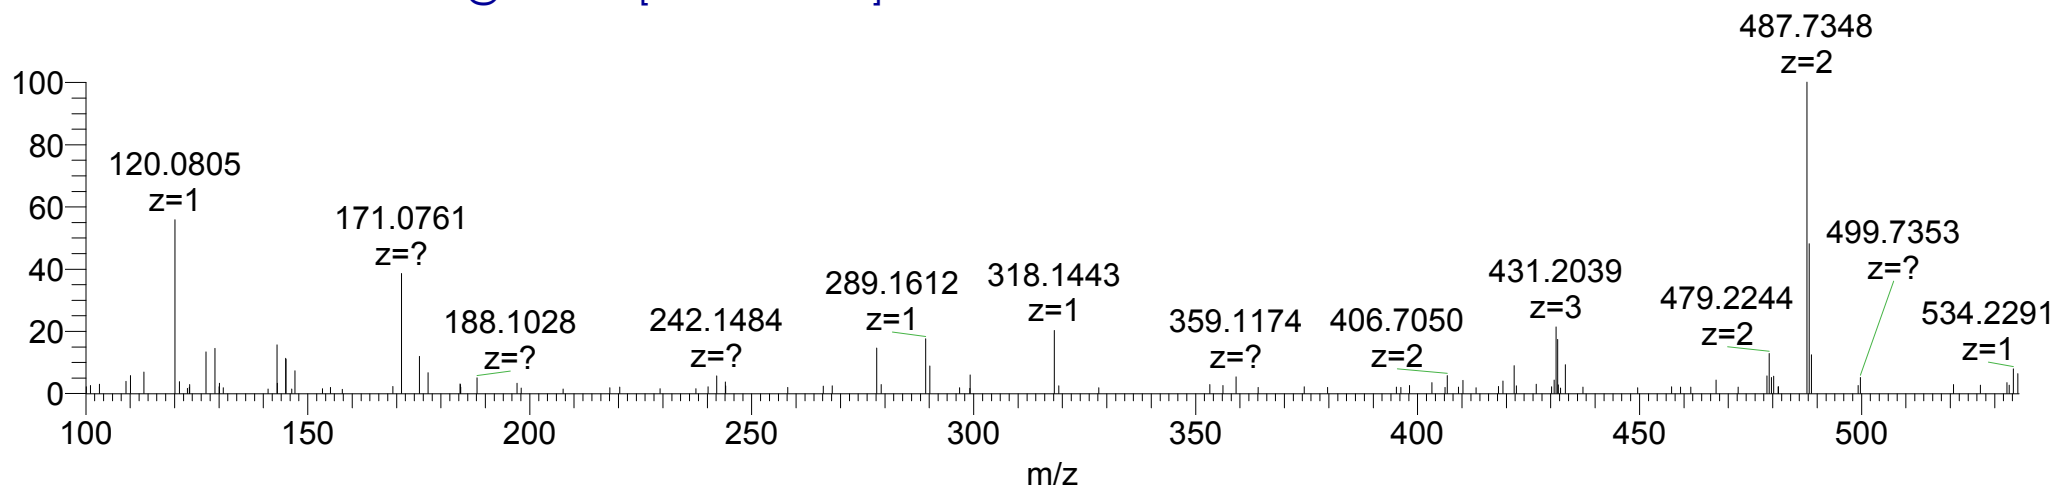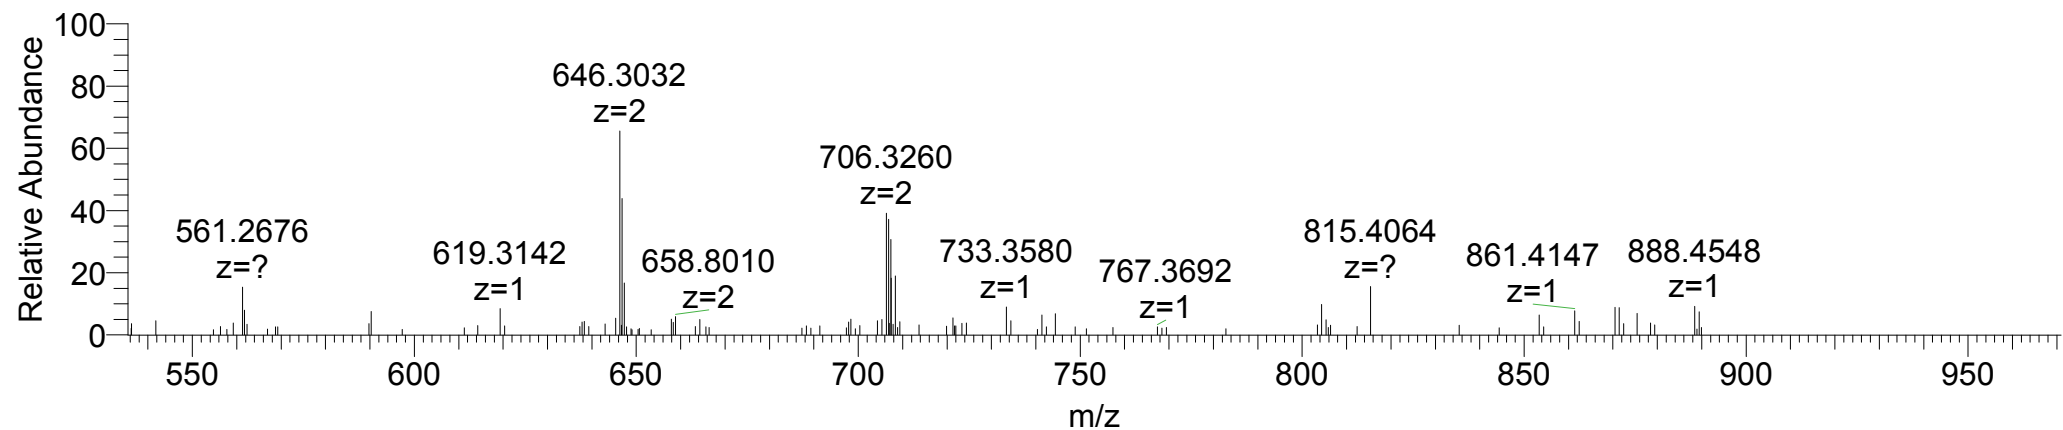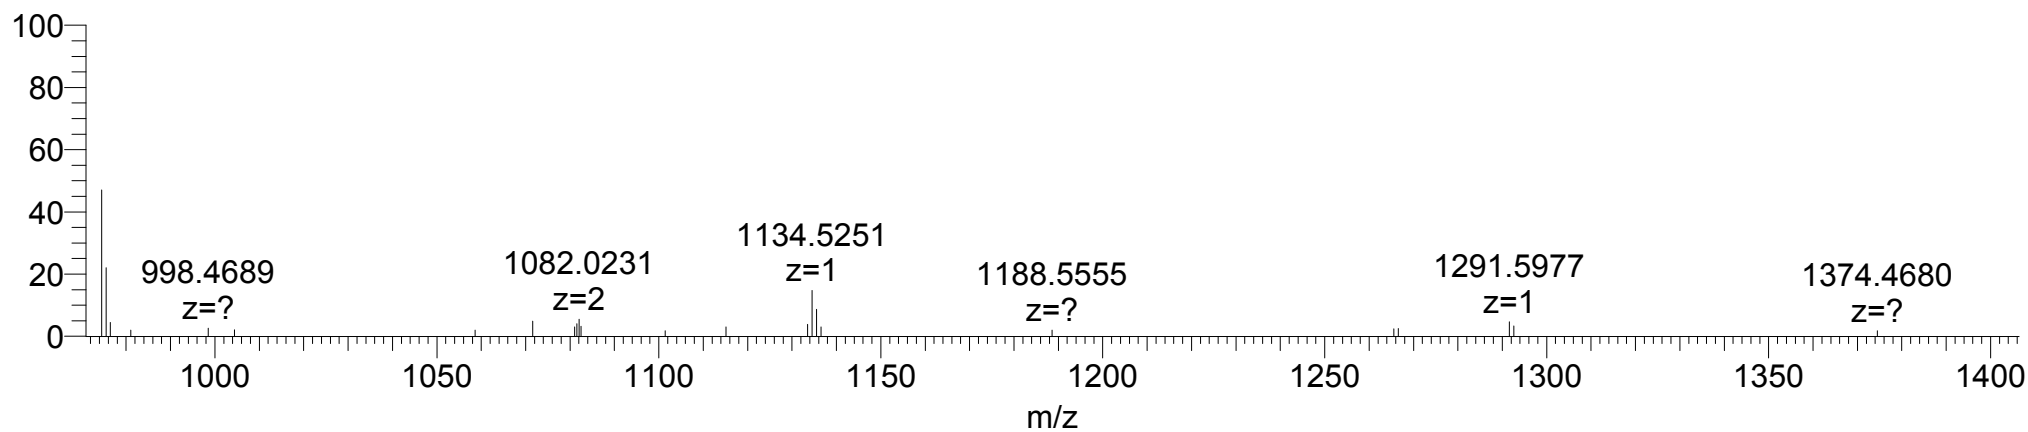

Human

**24.**

**P903-OH**

#901-909: GTPPGKPGPR

| Ion                      | charge state | Theoretical m/z (mono) | Experimental m/z (mono) | Mass error (Da) | Mass error (PPM) |
|--------------------------|--------------|------------------------|-------------------------|-----------------|------------------|
| [M+2H]+2OH               | 2            | 499.7407               | 499.7373                | -0.0068         | -6.8             |
| K                        | 1            | 129.1022               | 129.1012                | -0.0010         | -7.8             |
| b2                       | 1            | 159.0764               | 159.0757                | -0.0007         | -4.4             |
| PGK+OH/GKP+OH/<br>KPG+OH | 1            | 299.1714               | 299.1692                | -0.0022         | -7.4             |
| y7+2OH                   | 2            | 370.7061               | 370.7034                | -0.0054         | -7.3             |
| y4+OH                    | 1            | 442.2409               | 442.2369                | -0.0040         | -9.1             |
| y6+OH                    | 1            | 627.3573               | 627.3539                | -0.0034         | -5.4             |
| y7+2OH                   | 1            | 740.4050               | 740.3983                | -0.0067         | -9.1             |

**\*Unlocalized sites: P906-OH?, P908-OH?**

**Pseudolocalized sites: P906-OH**

12\_9\_2011Col5a1\_ArgC\_3 #199 RT: 3.04 AV: 1 NL: 2.23E4

T: FTMS + c NSI d Full ms2 449.74@hcd30.00 [100.00-910.00]

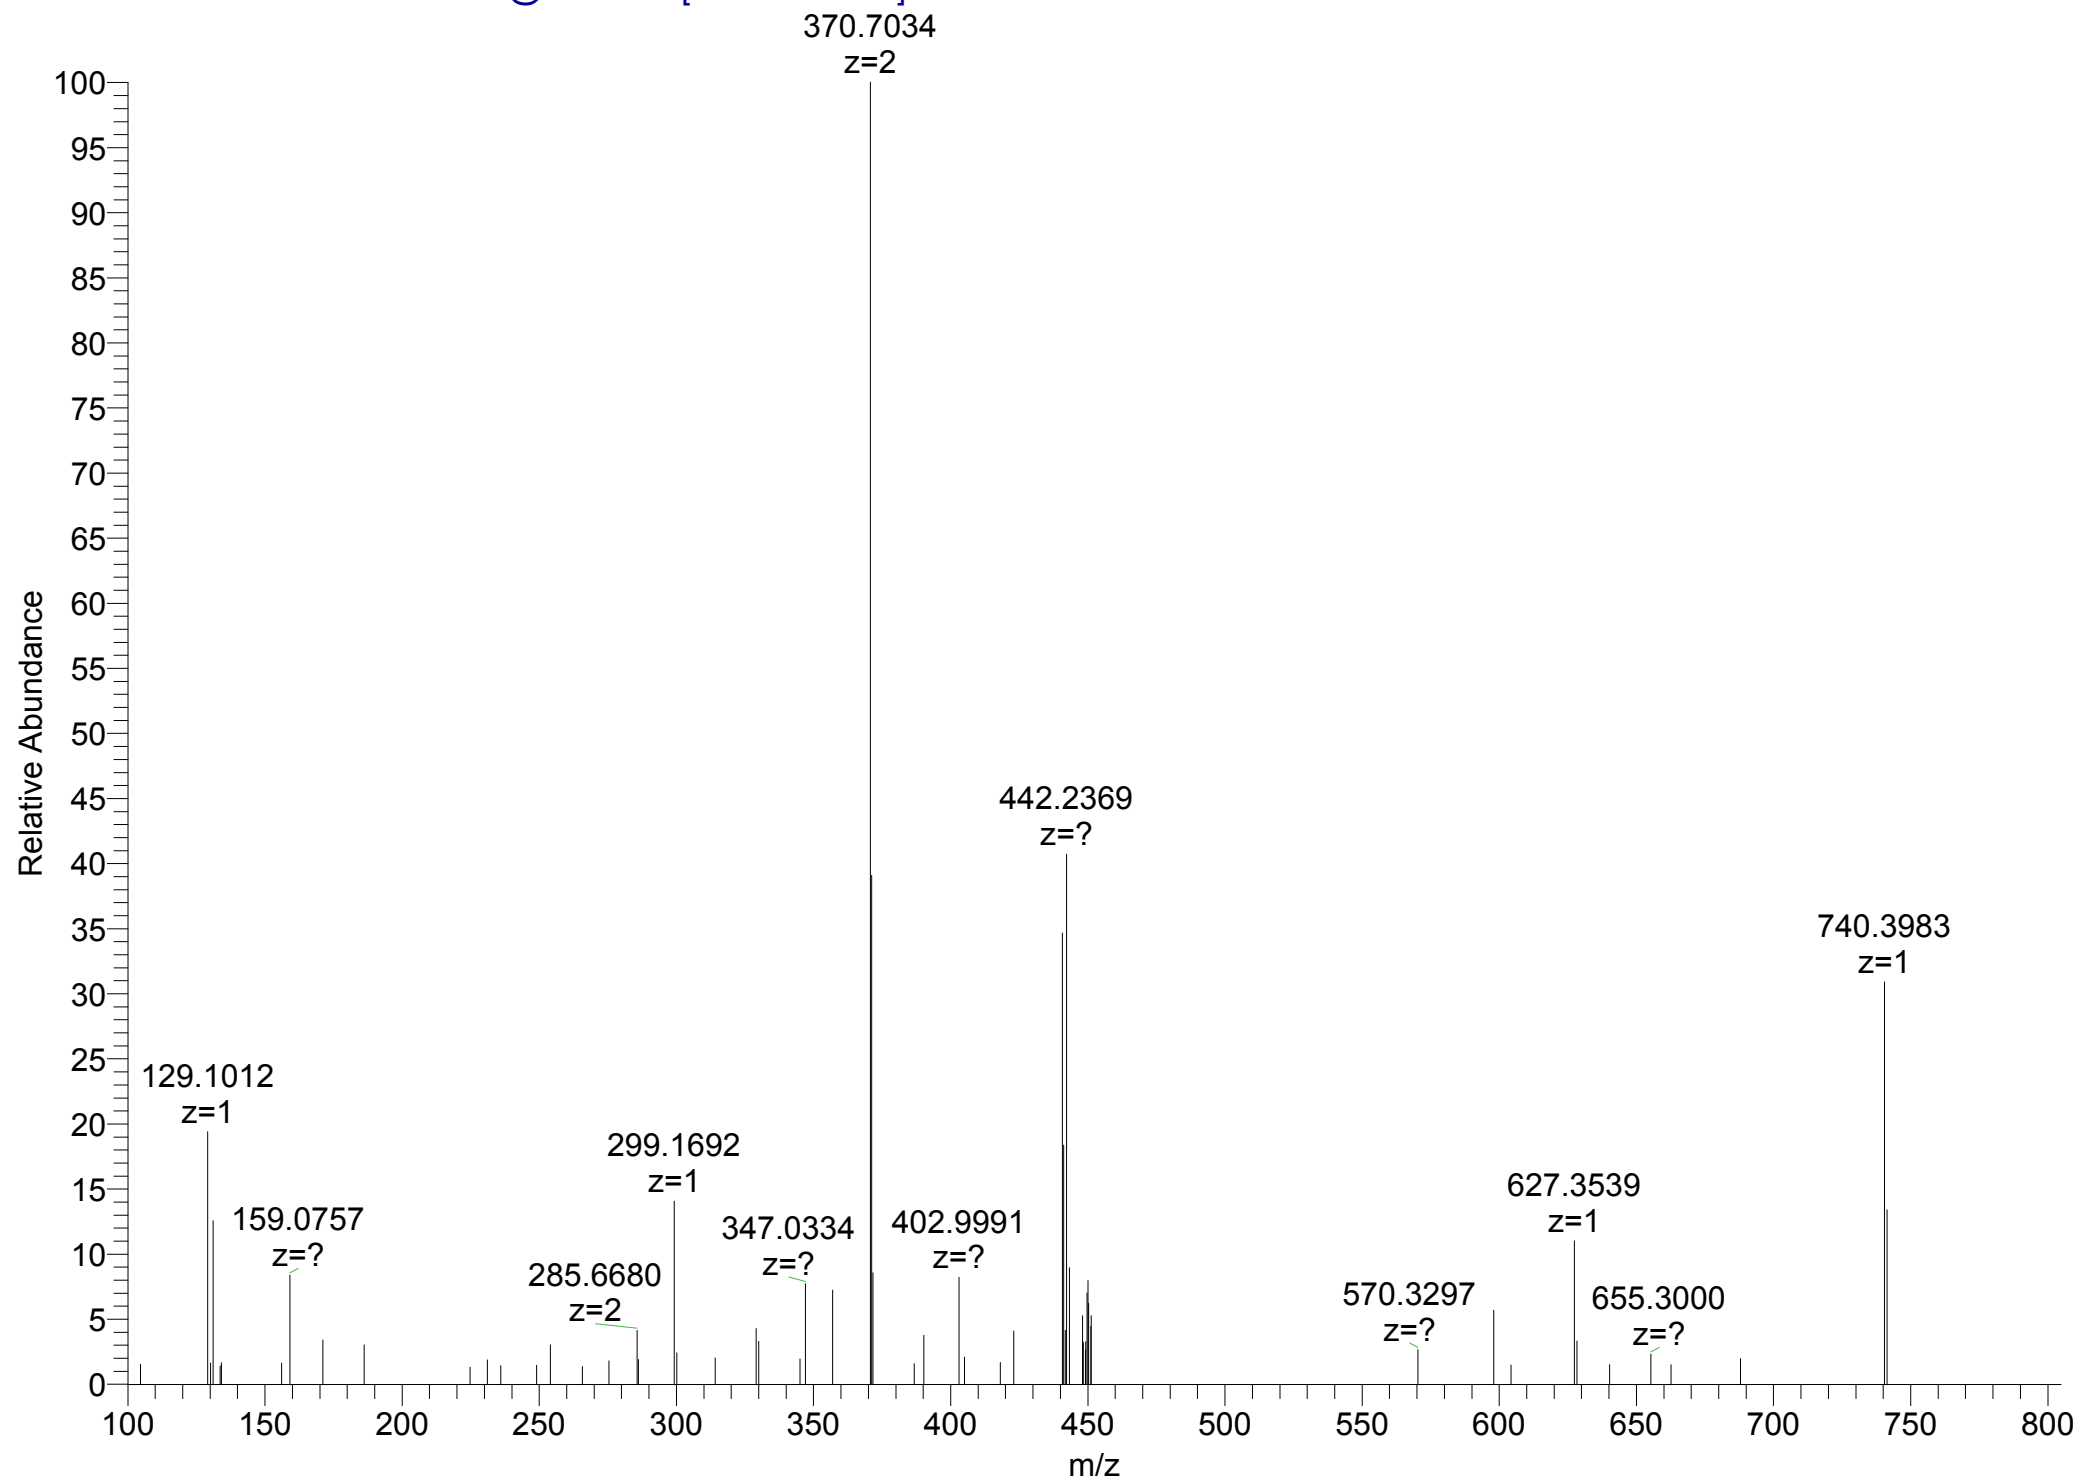

Human

**25.**

**P930-OH, P944-OH, P945-OH**

#925-948: GITGKPGPKGNSGGDGPAGPPGER

| Ion        | charge state | Theoretical m/z (mono) | Experimental m/z (mono) | Mass error (Da) | Mass error (PPM) |
|------------|--------------|------------------------|-------------------------|-----------------|------------------|
| [M+3H]+3OH | 3            | 736.6928               | 736.6862                | -0.0198         | -9.0             |
| y8+2OH     | 2            | 406.6985               | 406.6952                | -0.0066         | -8.1             |
| y5+2OH     | 1            | 587.2784               | 587.2728                | -0.0056         | -9.6             |
| y6+2OH     | 1            | 644.2998               | 644.2947                | -0.0051         | -7.9             |
| b15+OH     | 2            | 670.3337               | 670.3284                | -0.0106         | -7.9             |
| y7+2OH     | 1            | 715.3369               | 715.3282                | -0.0087         | -12.2            |
| [M+3H]+3OH | 3            | 736.6928               | 736.6868                | -0.0180         | -8.2             |
| y17+2OH    | 2            | 791.3662               | 791.3610                | -0.0104         | -6.6             |
| y8+2OH     | 1            | 812.3897               | 812.3862                | -0.0035         | -4.3             |
| y19+3OH    | 2            | 876.4008               | 876.3936                | -0.0144         | -8.2             |
| y21+3OH    | 2            | 968.9590               | 968.9550                | -0.0080         | -4.1             |
| y22+3OH    | 2            | 1019.4829              | 1019.4711               | -0.0236         | -11.6            |
| y12+3OH    | 1            | 1098.4810              | 1098.4607               | -0.0203         | -18.5            |
| y15+2OH    | 1            | 1356.5775              | 1356.5847               | 0.0072          | 5.3              |

12\_9\_2011Col5a1\_ArgC\_3 #981 RT: 10.28 AV: 1 NL: 2.59E4

T: FTMS + c NSI d Full ms2 737.02@hcd30.00 [100.00-2000.00]

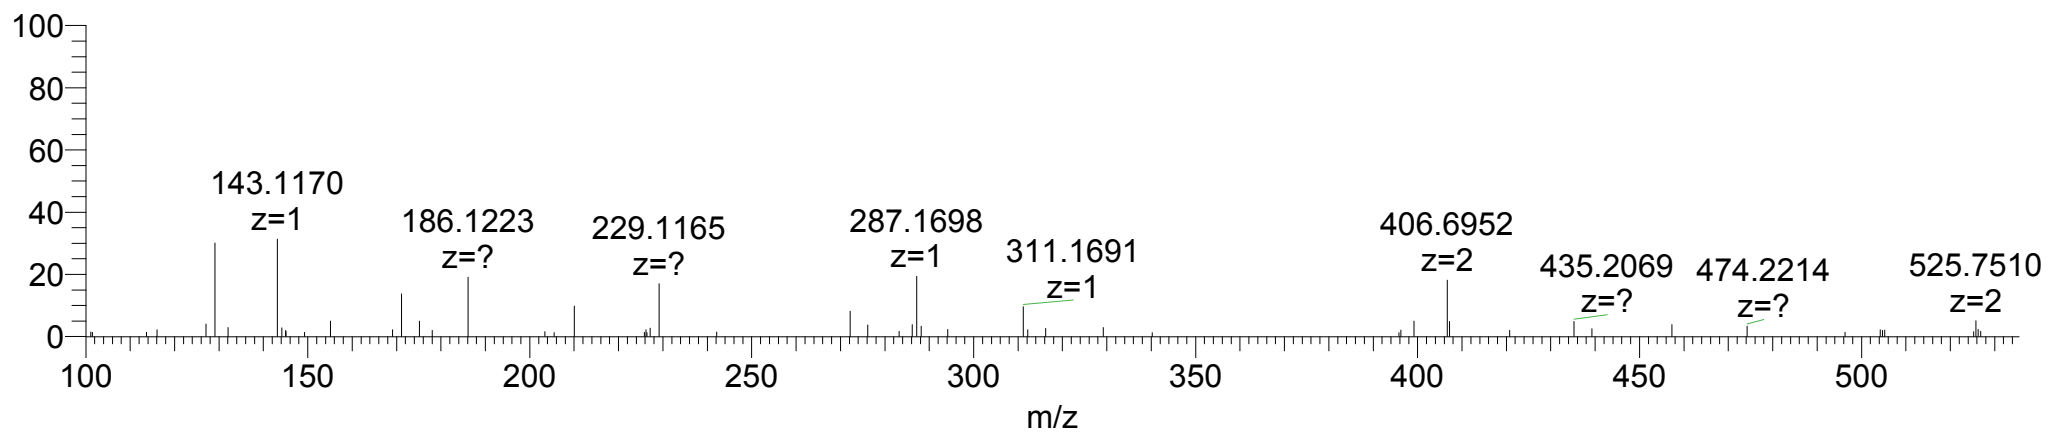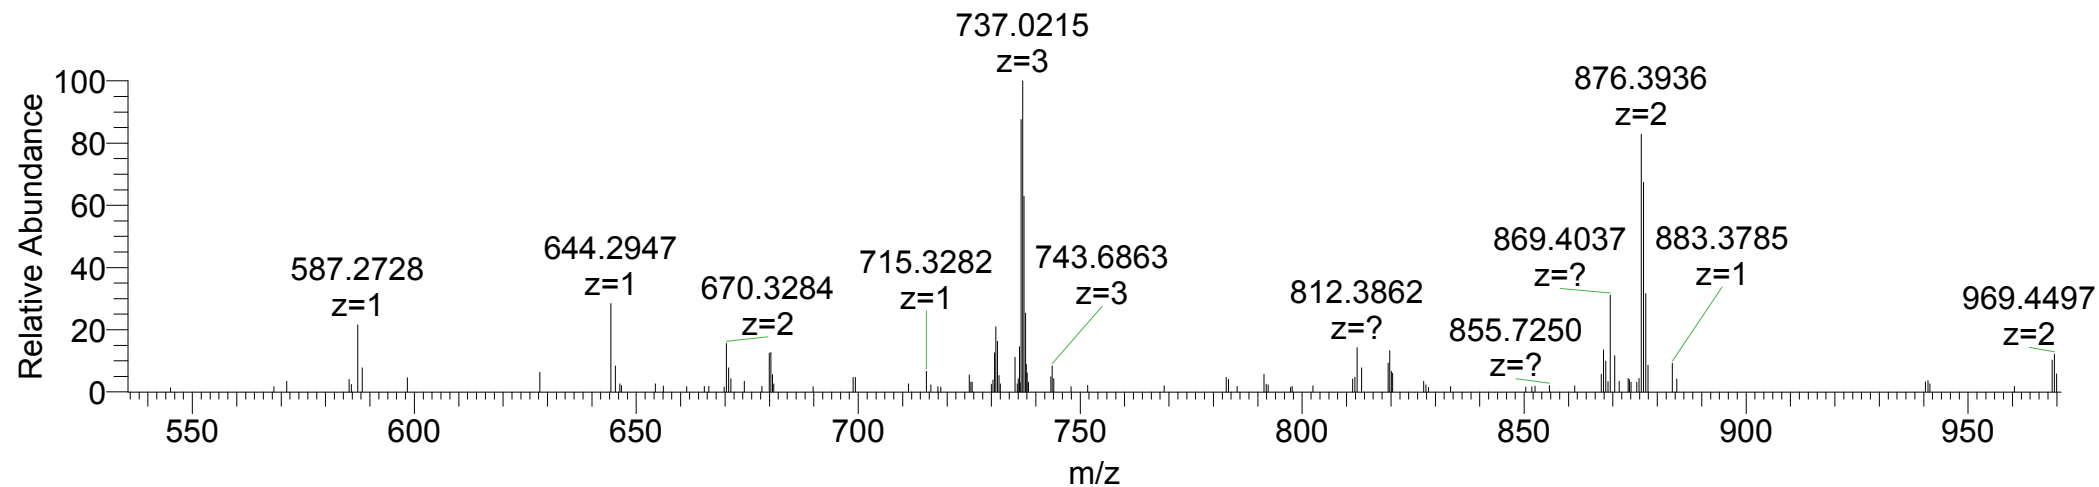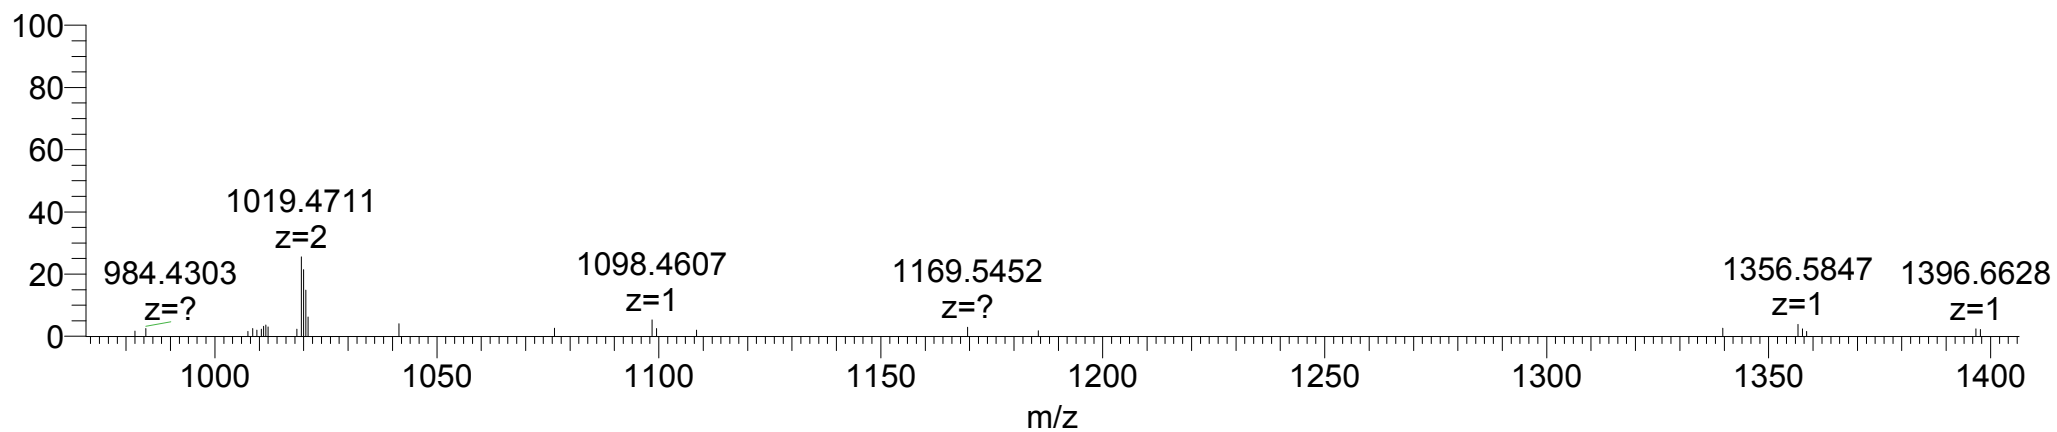



Human

26.

**K933-OH.Gal.Glc, P945-OH**

#925-948: GITGKPGPKKGNSGGDGPAGPPPGER

| Ion                   | charge state | Theoretical m/z (mono) | Experimental m/z (mono) | Mass error (Da) | Mass error (PPM) |
|-----------------------|--------------|------------------------|-------------------------|-----------------|------------------|
| [M+3H]+2OH+Gal.Glc    | 3            | 839.3964               | 839.3944                | -0.0060         | -2.4             |
| K                     | 1            | 129.1022               | 129.1020                | -0.0002         | -1.6             |
| a2                    | 1            | 143.1179               | 143.1177                | -0.0002         | -1.4             |
| GK                    | 1            | 186.1237               | 186.1233                | -0.0004         | -2.2             |
| ITG/b3/PRG            | 1            | 272.1605               | 272.1599                | -0.0006         | -2.2             |
| TGK                   | 1            | 287.1714               | 287.1707                | -0.0007         | -2.4             |
| b4-H2O/<br>AGPP-28+OH | 1            | 311.1714               | 311.1709                | -0.0005         | -1.6             |
| PGPK+OH               | 1            | 396.2241               | 396.2231                | -0.0010         | -2.5             |
| y9+OH                 | 2            | 427.2118               | 427.2114                | -0.0008         | -0.9             |
| y4+OH                 | 1            | 474.2307               | 474.2293                | -0.0014         | -3.0             |
| y5+OH                 | 1            | 571.2835               | 571.2824                | -0.0011         | -1.9             |
| y6+OH                 | 1            | 628.3049               | 628.3038                | -0.0011         | -1.8             |
| b15+OH                | 2            | 670.3337               | 670.3338                | 0.0002          | 0.1              |
| y7+OH                 | 1            | 699.3420               | 699.3400                | -0.0020         | -2.9             |
| [M+3H]+2OH            | 3            | 731.3612               | 731.3610                | -0.0006         | -0.3             |
| y8+OH                 | 1            | 796.3948               | 796.3939                | -0.0009         | -1.1             |
| y9+OH                 | 1            | 853.4163               | 853.4139                | -0.0024         | -2.8             |
| y19+2OH               | 2            | 868.4033               | 868.4013                | -0.0040         | -2.3             |
| y21+2OH               | 2            | 960.9616               | 960.9589                | -0.0054         | -2.8             |
| y22+2OH               | 2            | 1011.4854              | 1011.4825               | -0.0058         | -2.9             |
| y13+OH                | 1            | 1169.5182              | 1169.5286               | 0.0104          | 8.9              |
| y14+OH                | 1            | 1283.5611              | 1283.5494               | -0.0117         | -9.1             |
| y15+OH                | 1            | 1340.5825              | 1340.5782               | -0.0043         | -3.2             |

10\_7\_2011Collagen\_Trypsin\_HCDandETD\_111009033323 #1625 RT: 14.37 AV: 1 NL: 1.49E5

T: FTMS + c NSI d Full ms2 839.73@hcd35.00 [100.00-2000.00]

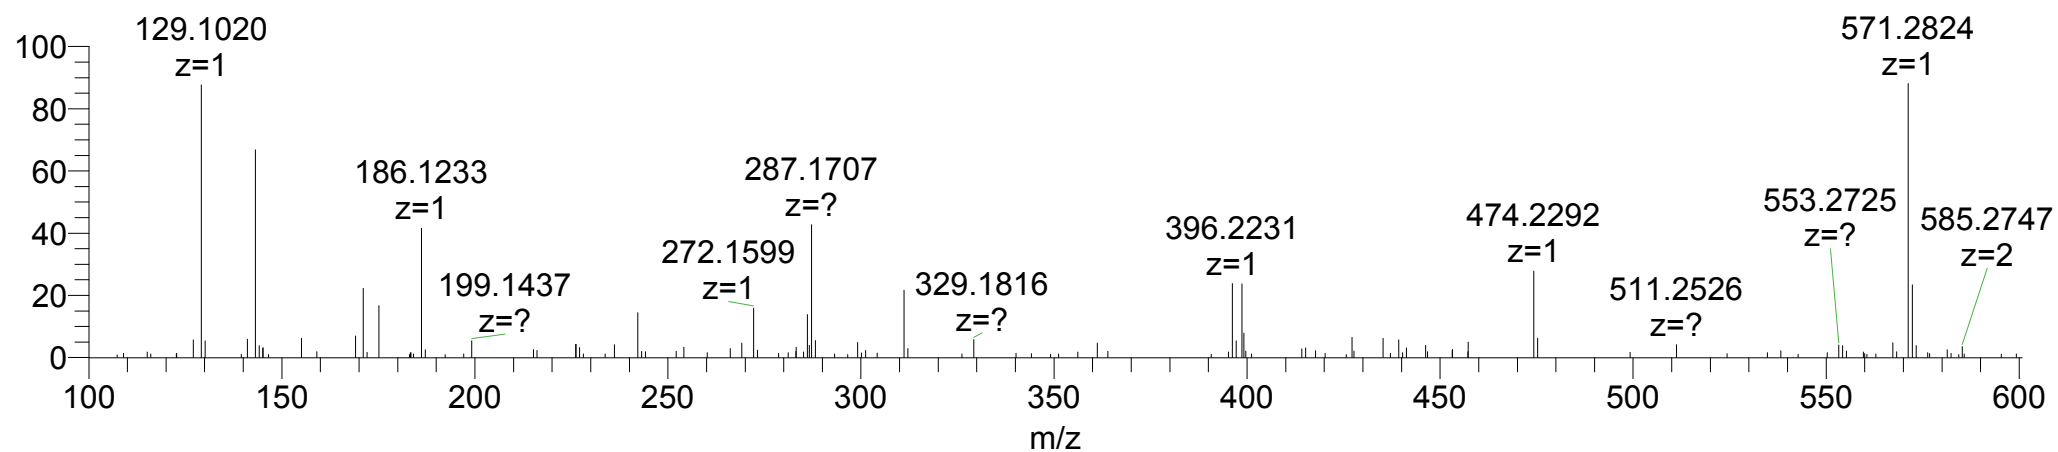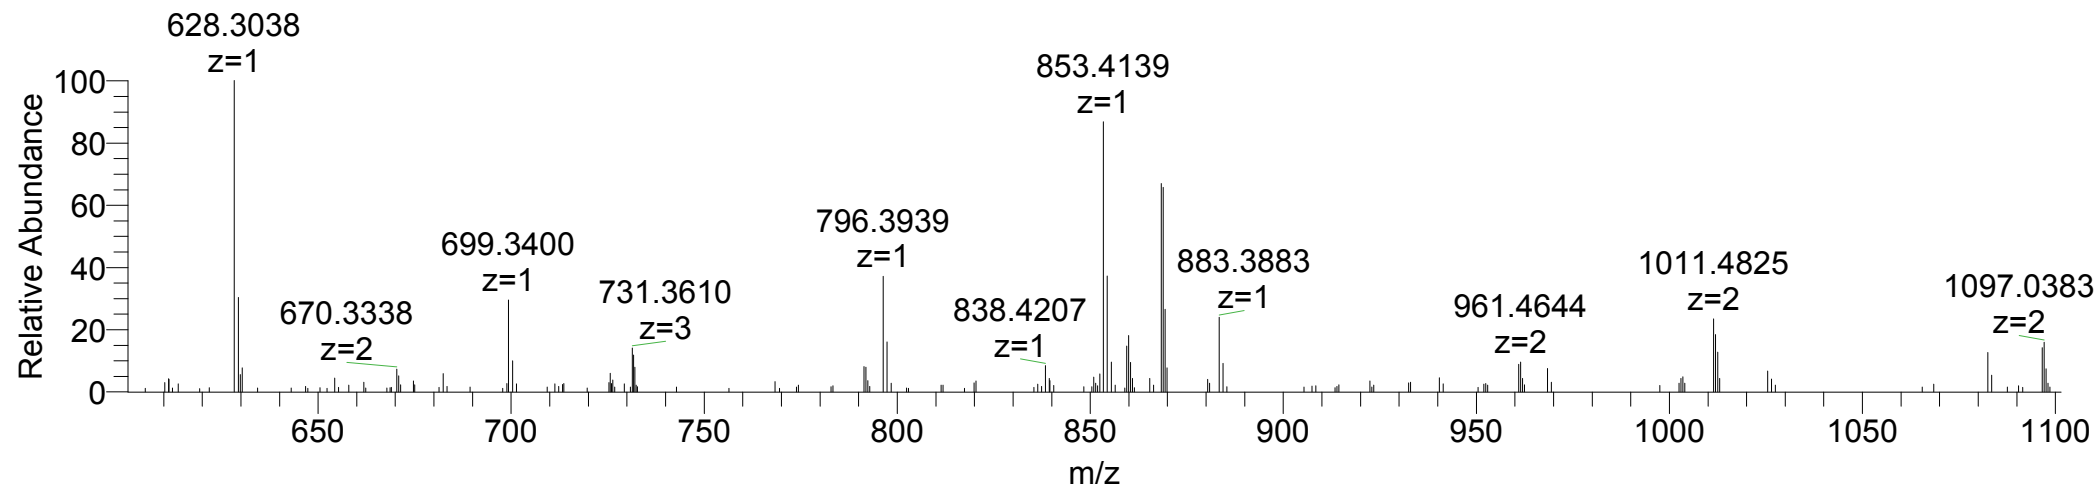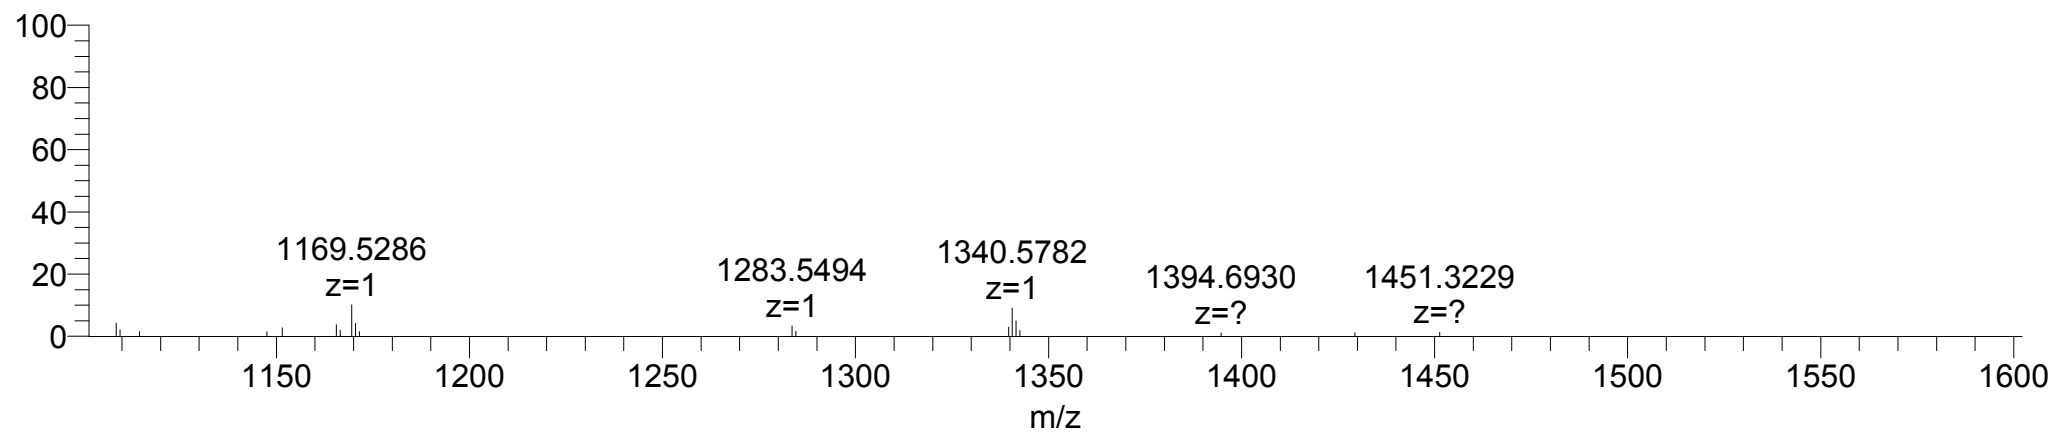

Human

27.

P960-OH

#949-963: GPNGPQGPTGFPGPK

| Ion            | charge state | Theoretical m/z (mono) | Experimental m/z (mono) | Mass error (Da) | Mass error (PPM) |
|----------------|--------------|------------------------|-------------------------|-----------------|------------------|
| [M+2H]+2OH     | 2            | 720.3493               | 720.3426                | -0.0134         | -9.3             |
| b2/GP          | 1            | 155.0815               | 155.0802                | -0.0013         | -8.4             |
| y2+OH          | 1            | 260.1605               | 260.1584                | -0.0021         | -8.1             |
| y3+OH          | 1            | 317.1819               | 317.1795                | -0.0024         | -7.6             |
| y4+2OH         | 1            | 430.2296               | 430.2296                | 0.0000          | 0.0              |
| b6-2NH3        | 1            | 517.2041               | 517.1995                | -0.0046         | -8.9             |
| y11+2OH        | 2            | 557.7800               | 557.7754                | -0.0092         | -8.3             |
| y12+2OH        | 2            | 586.2907               | 586.2853                | -0.0108         | -9.2             |
| y6+2OH         | 1            | 634.3195               | 634.3146                | -0.0049         | -7.7             |
| [M+2H]-H2O+2OH | 2            | 711.3440               | 711.3383                | -0.0114         | -8.0             |
| [M+2H]+2OH     | 2            | 720.3493               | 720.3416                | -0.0154         | -10.7            |
| y7+2OH         | 1            | 735.3672               | 735.3605                | -0.0067         | -9.1             |
| y8+2OH         | 1            | 832.4199               | 832.4131                | -0.0068         | -8.2             |
| y9+2OH         | 1            | 889.4414               | 889.4330                | -0.0084         | -9.5             |
| y11+2OH        | 1            | 1114.5527              | 1114.5428               | -0.0099         | -8.9             |
| y12+2OH        | 1            | 1171.5742              | 1171.5652               | -0.0090         | -7.7             |

\*Unlocalized sites: P962-OH?, K963-OH?

Pseudolocalized sites: K963-OH

12\_9\_2011Col5a1\_Trypsin\_CE30 #2101 RT: 20.27 AV: 1 NL: 1.27E6

T: FTMS + c NSI d Full ms2 720.34@hcd30.00 [100.00-1455.00]

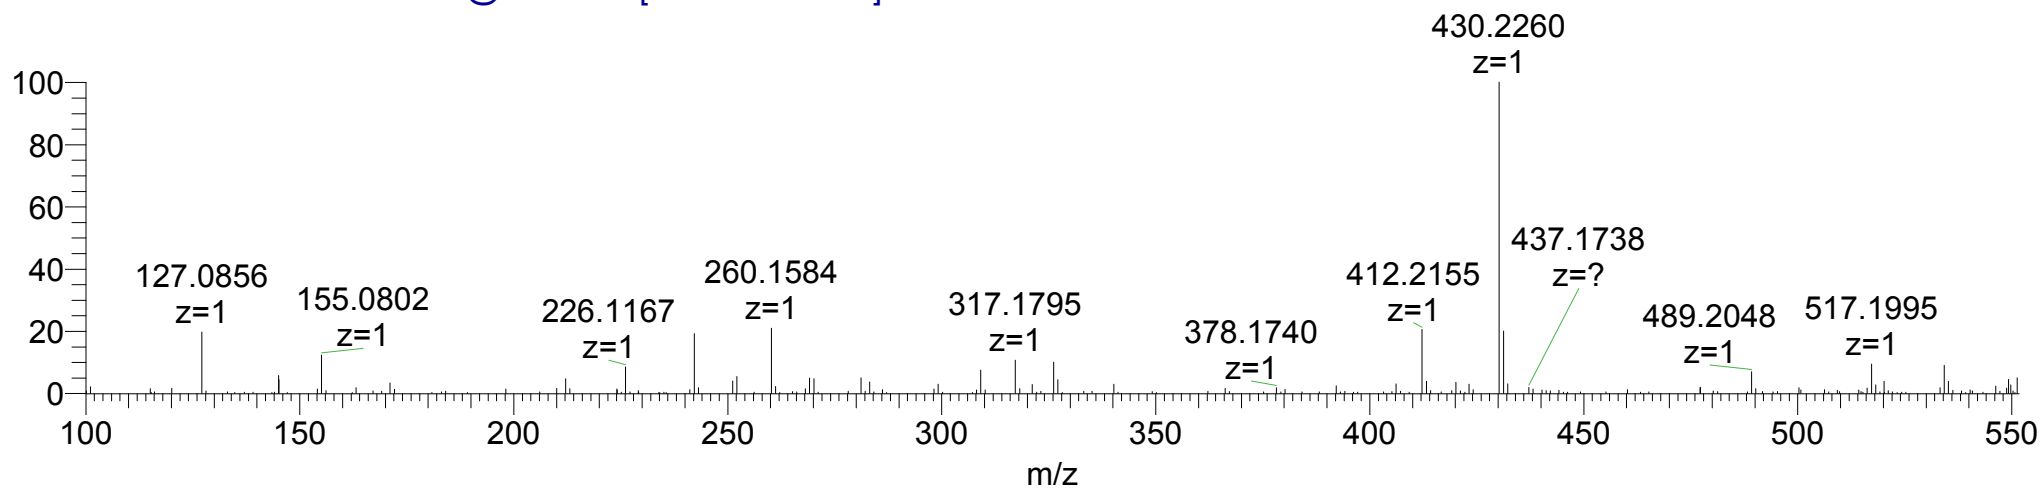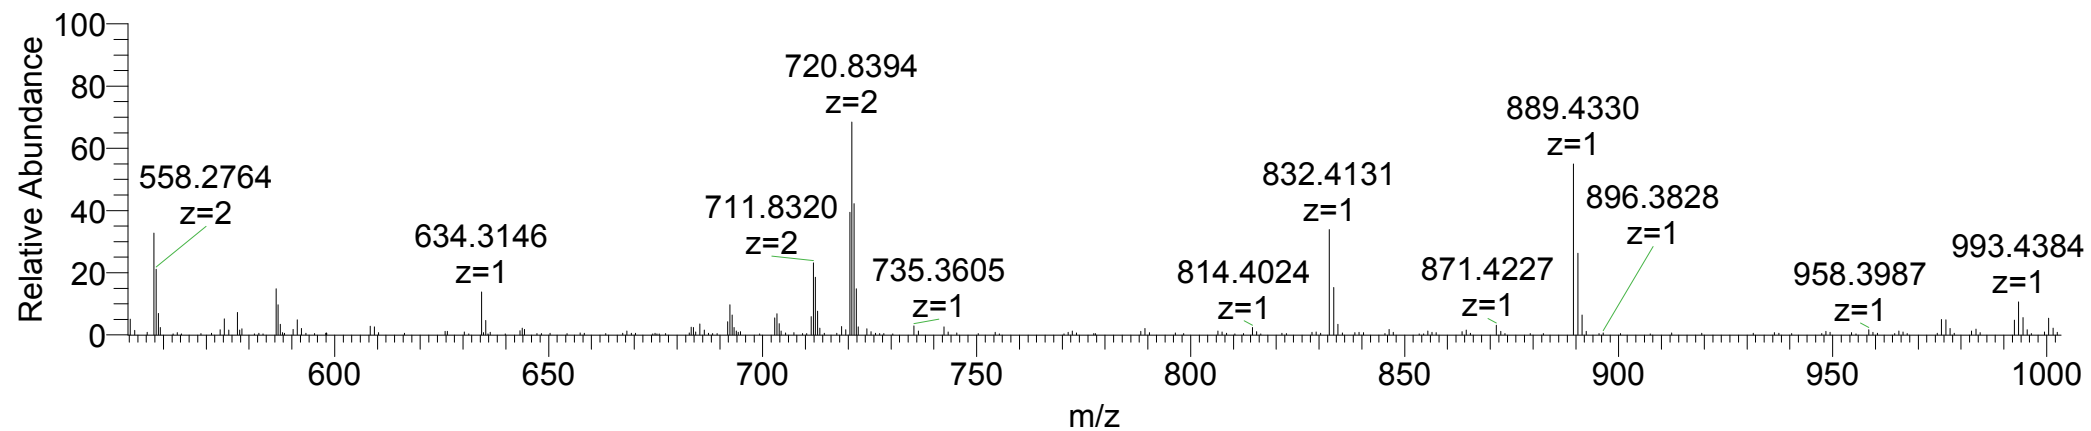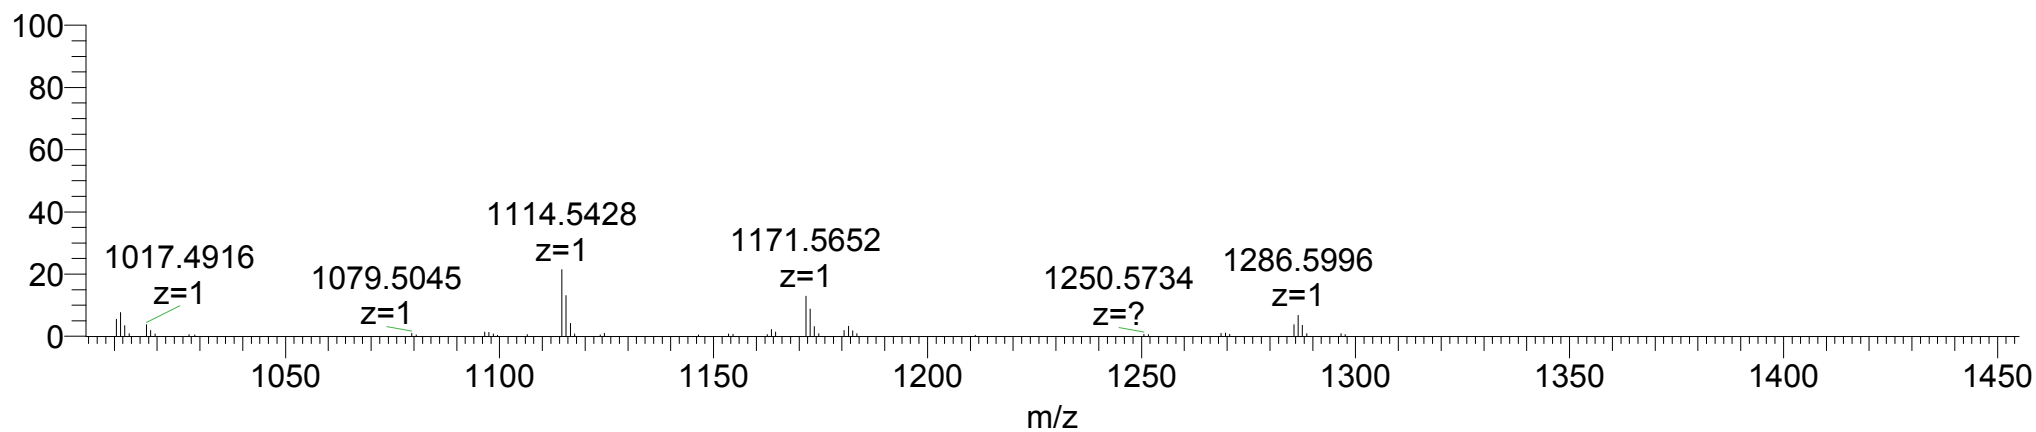

Human

28.

P966-OH, P969-OH, P975-OH, P978-OH

#964-981: GPPGPPGKDGLPGHPGQR

MS<sup>2</sup>: GPPGPPGKDGLPGHPGQR (ETD)

| Ion                          | charge state | Theoretical m/z (mono) | Experimental m/z (mono) | Mass error (Da) | Mass error (PPM) |
|------------------------------|--------------|------------------------|-------------------------|-----------------|------------------|
| [M+4H]+4OH                   | 4            | 446.9723               | 446.9725                | 0.0008          | 0.4              |
| z1                           | 1            | 159.1002               | 159.1005                | 0.0003          | 1.9              |
| z8+2OH                       | 2            | 439.2237               | 439.2238                | 0.0002          | 0.2              |
| [M+4H]+4OH                   | 4            | 446.9723               | 446.9724                | 0.0004          | 0.2              |
| z10+2OH                      | 2            | 525.2479               | 525.2480                | 0.0002          | 0.2              |
| [M+3H]+4OH(MS <sup>3</sup> ) | 3            | 595.6273               | 595.6260                | -0.0039         | -2.2             |
| c7+2OH                       | 1            | 609.2991               | 609.2991                | 0.0000          | 0.0              |
| c8+2OH                       | 1            | 737.3941               | 737.3950                | 0.0009          | 1.2              |
| c17+4OH                      | 2            | 814.3948               | 814.3951                | 0.0006          | 0.4              |
| c10+2OH                      | 1            | 909.4425               | 909.4426                | 0.0001          | 0.1              |

MS<sup>3</sup>: GPPGPPGKDGLPGHPGQR (HCD)

| Ion           | charge state | Theoretical m/z (mono) | Experimental m/z (mono) | Mass error (Da) | Mass error (PPM) |
|---------------|--------------|------------------------|-------------------------|-----------------|------------------|
| a2            | 1            | 127.0866               | 127.0865                | -0.0001         | -0.8             |
| b2/GP         | 1            | 155.0815               | 155.0815                | 0.0000          | 0.0              |
| GPPG+OH/b4+OH | 1            | 325.1506               | 325.1499                | -0.0007         | -2.2             |
| y7+2OH        | 2            | 390.6910               | 390.6908                | -0.0004         | -0.5             |
| y4+OH         | 1            | 473.2467               | 473.2462                | -0.0005         | -1.1             |
| y16+4OH       | 3            | 544.2693               | 544.2690                | -0.0009         | -0.6             |
| y13+3OH       | 2            | 682.3393               | 682.3397                | 0.0008          | 0.6              |
| y14+3OH       | 2            | 730.8657               | 730.8641                | -0.0032         | -2.2             |
| y15+3OH       | 2            | 759.3764               | 759.3748                | -0.0032         | -2.1             |
| y7+2OH        | 1            | 780.3747               | 780.3753                | 0.0006          | 0.8              |
| y16+4OH       | 2            | 815.9002               | 815.8990                | -0.0024         | -1.5             |
| y9+2OH        | 1            | 950.4803               | 950.4813                | 0.0010          | 1.1              |
| b11+2OH       | 1            | 1005.5000              | 1005.5027               | 0.0027          | 2.7              |

10\_7\_2011Collagen\_Trypsin\_MS3\_ETDandHCD #1143 RT: 13.31 AV: 1 NL: 1.80E5

T: FTMS + c NSI d Full ms2 447.22@etd27.50 [100.00-1800.00]

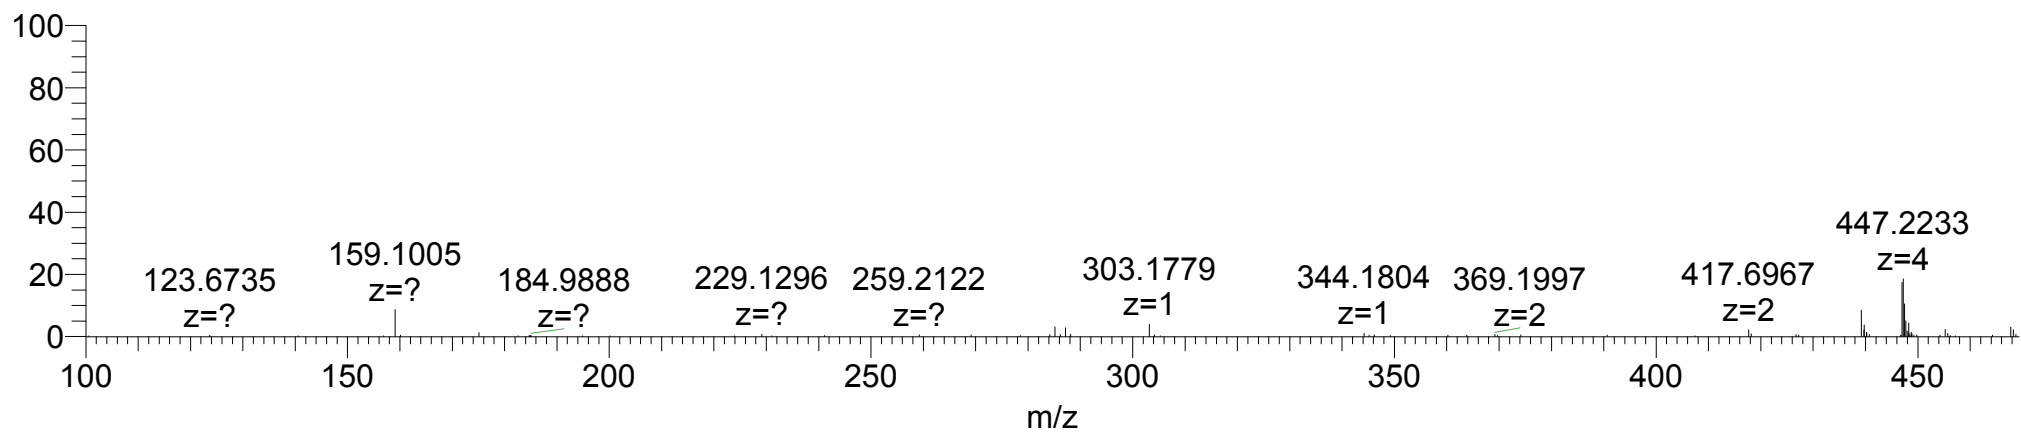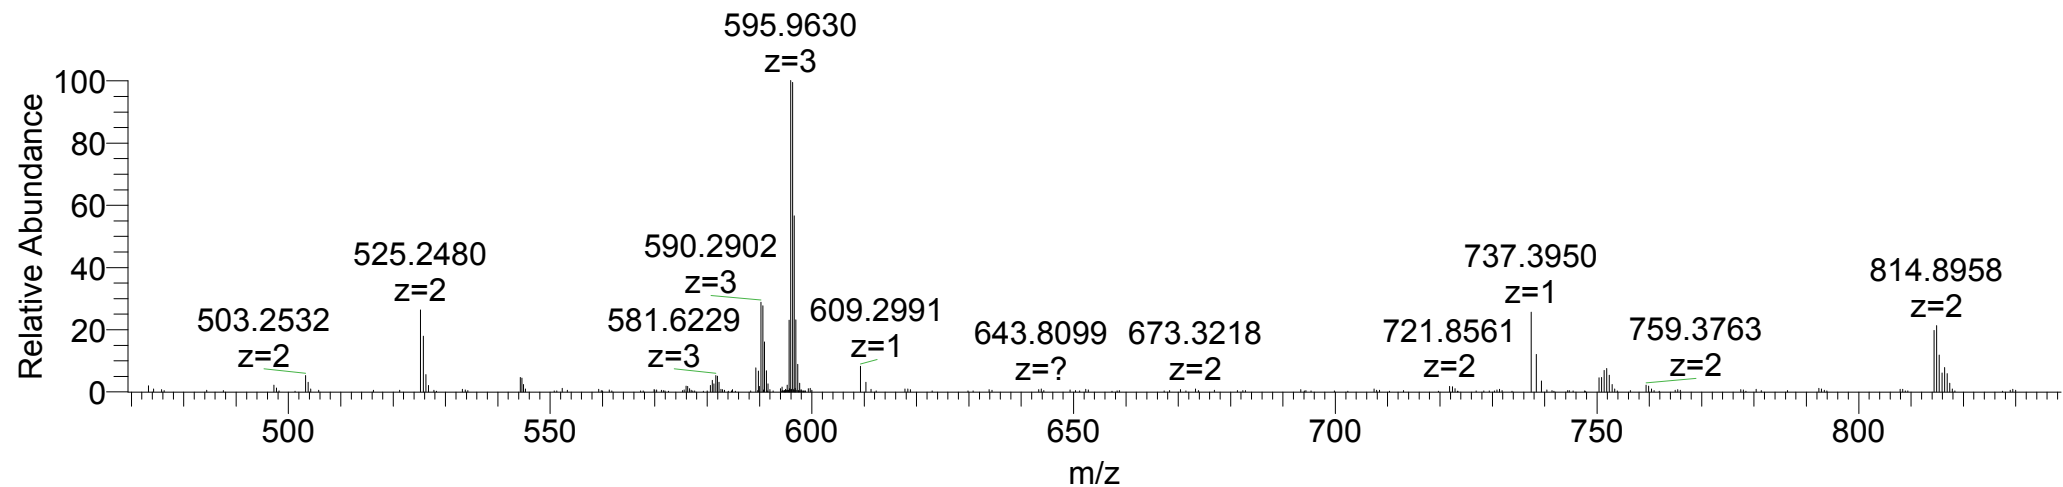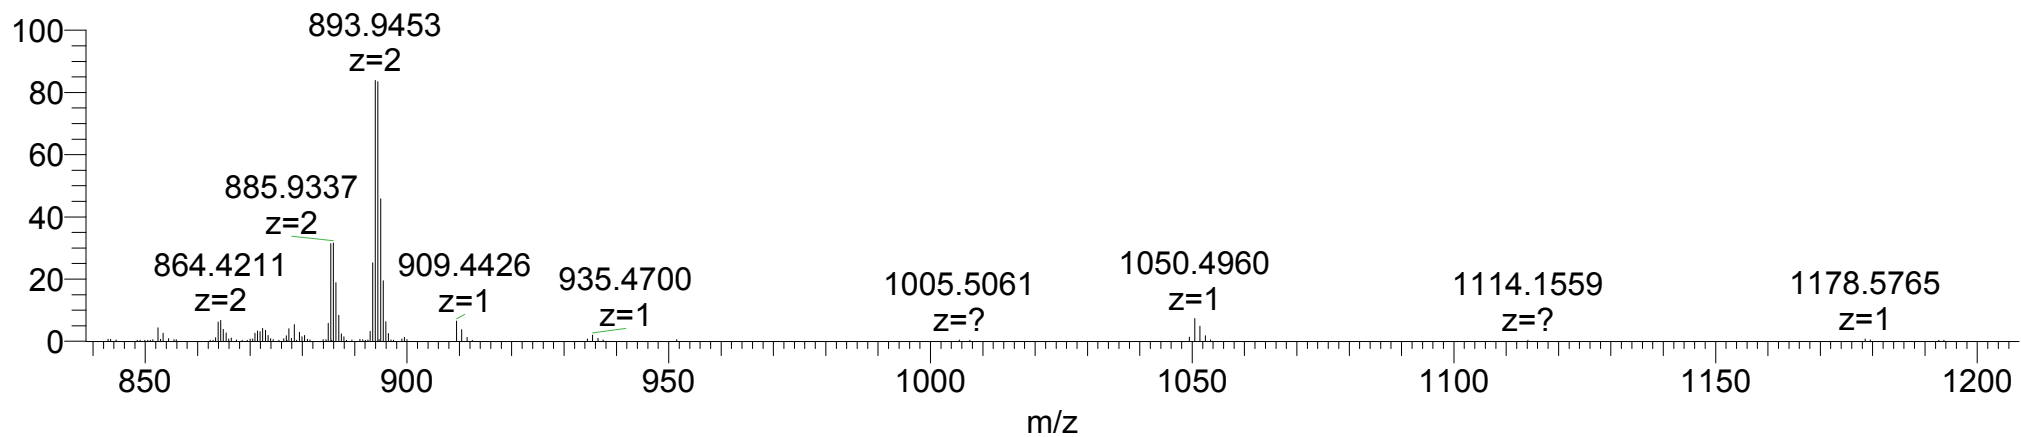

10\_7\_2011Collagen\_Trypsin\_MS3\_ETDandHCD #1144 RT: 13.32 AV: 1 NL: 1.37E4

T: FTMS + c NSI d Full ms3 447.22@etd36.67 595.96@hcd30.00 [100.00-1800.00]

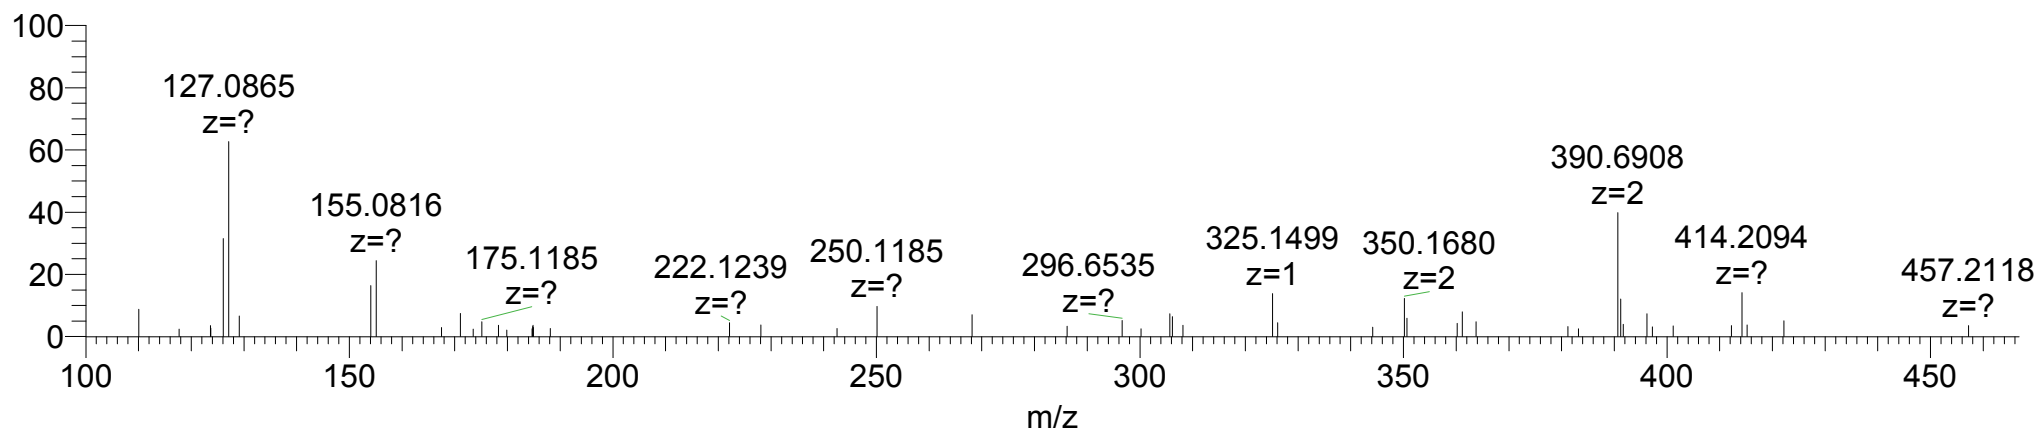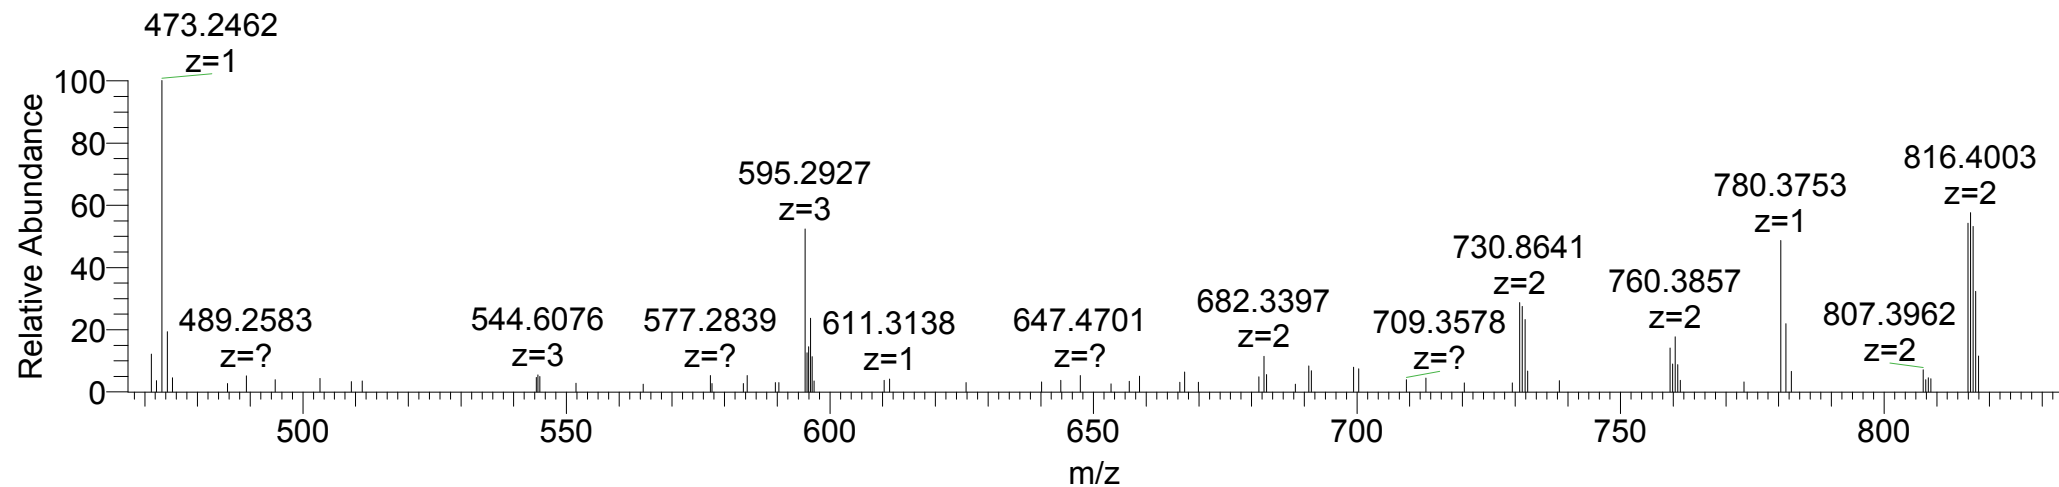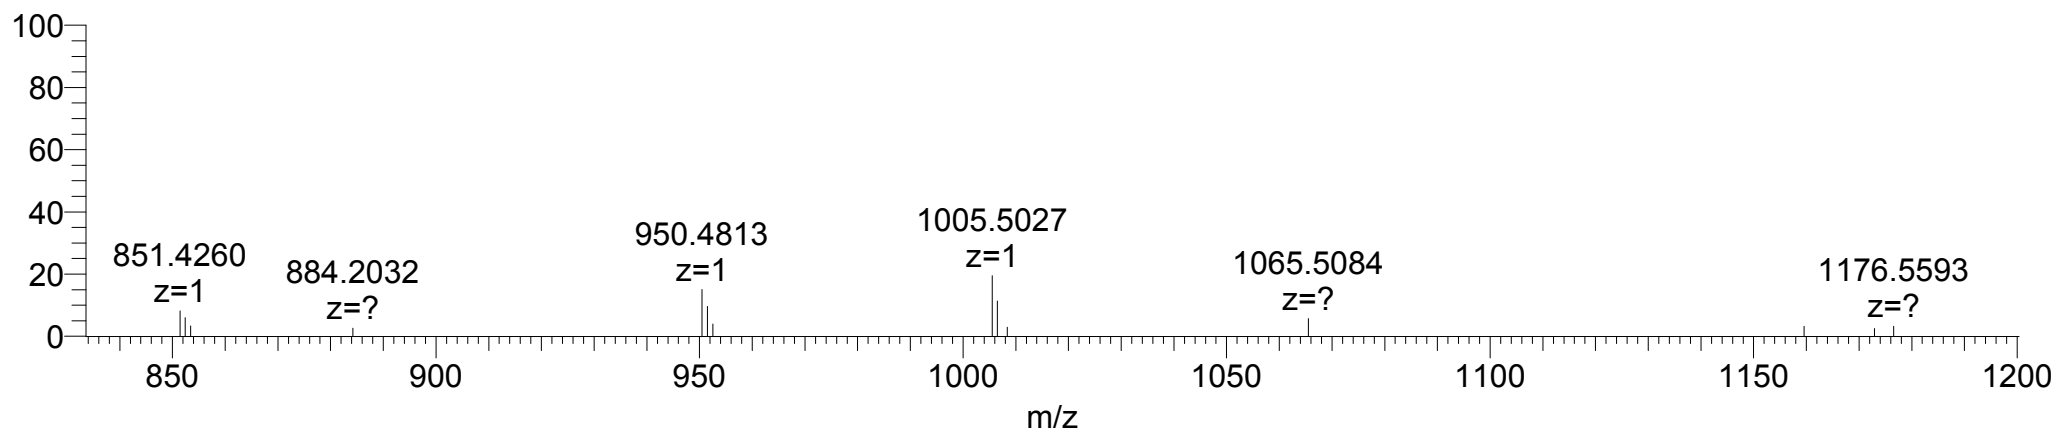

Human

**29.**

**P992-OH, P993-OH, P995-OH, P996-OH**

#990-1014: TGPPGPPGVVGPQGPTGETGPMGER

| Ion        | charge state | Theoretical m/z (mono) | Experimental m/z (mono) | Mass error (Da) | Mass error (PPM) |
|------------|--------------|------------------------|-------------------------|-----------------|------------------|
| [M+2H]+4OH | 2            | 1197.0555              | 1197.0542               | -0.0026         | -1.1             |
| y5         | 1            | 589.2763               | 589.2759                | -0.0004         | -0.7             |
| y6         | 1            | 646.2977               | 646.2985                | 0.0008          | 1.2              |
| y7         | 1            | 747.3454               | 747.3453                | -0.0001         | -0.1             |
| b9+4OH     | 1            | 824.3785               | 824.3801                | 0.0016          | 1.9              |
| b10+4OH    | 1            | 923.4469               | 923.4486                | 0.0017          | 1.8              |
| y20+2OH    | 2            | 976.4625               | 976.4645                | 0.0040          | 2.1              |
| y21+2OH    | 2            | 1004.9733              | 1004.9761               | 0.0056          | 2.8              |
| y22+3OH    | 2            | 1061.4971              | 1061.4967               | -0.0008         | -0.4             |
| y23+4OH    | 2            | 1118.0210              | 1118.0247               | 0.0074          | 3.3              |
| y11        | 1            | 1131.5099              | 1131.5100               | 0.0001          | 0.1              |
| b13+4OH    | 1            | 1205.5797              | 1205.5813               | 0.0016          | 1.3              |
| b14+4OH    | 1            | 1262.6012              | 1262.6013               | 0.0001          | 0.1              |
| y14        | 1            | 1413.6427              | 1413.6444               | 0.0017          | 1.2              |
| y15        | 1            | 1470.6642              | 1470.6643               | 0.0001          | 0.1              |
| y16        | 1            | 1569.7326              | 1569.7328               | 0.0002          | 0.1              |
| b18+4OH    | 1            | 1646.7657              | 1646.7671               | 0.0014          | 0.9              |
| b19+4OH    | 1            | 1747.8133              | 1747.8167               | 0.0034          | 1.9              |



10\_7\_2011Collagen\_Trypsin\_MS3\_CIDandHCD #3097 RT: 26.41 AV: 1 NL: 8.43E5

T: FTMS + c NSI d Full ms2 1197.56@cid35.00 [315.00-2000.00]

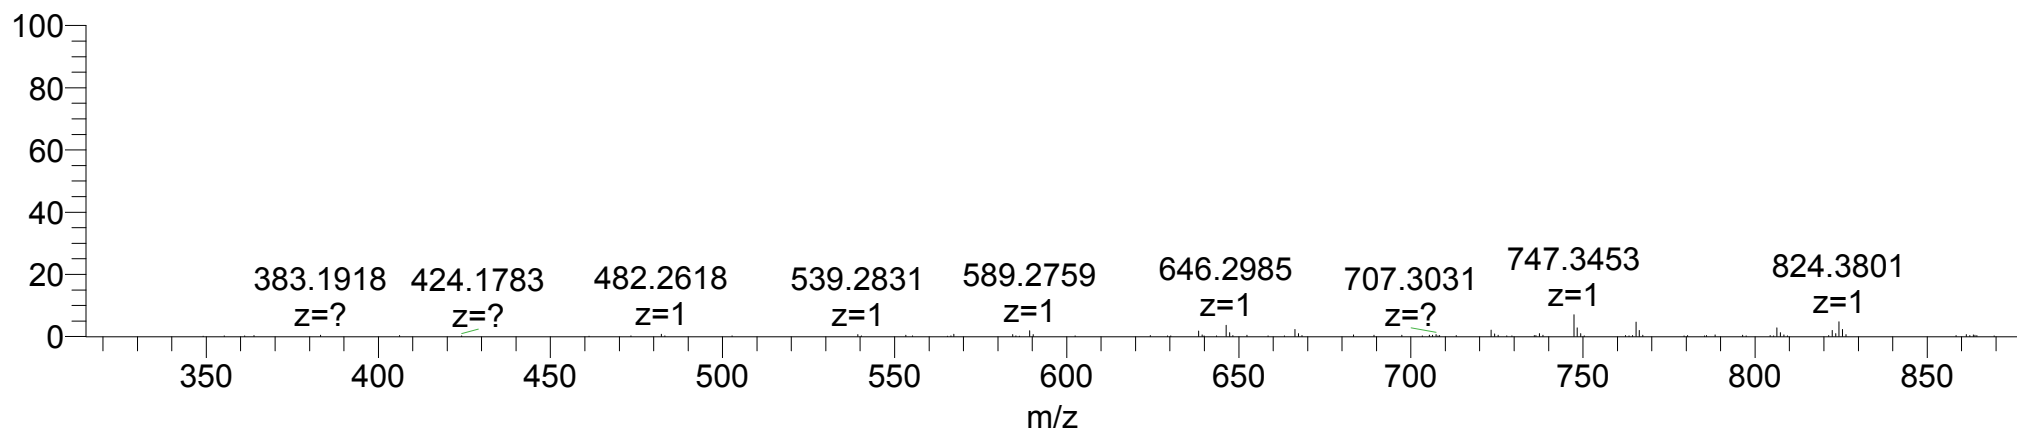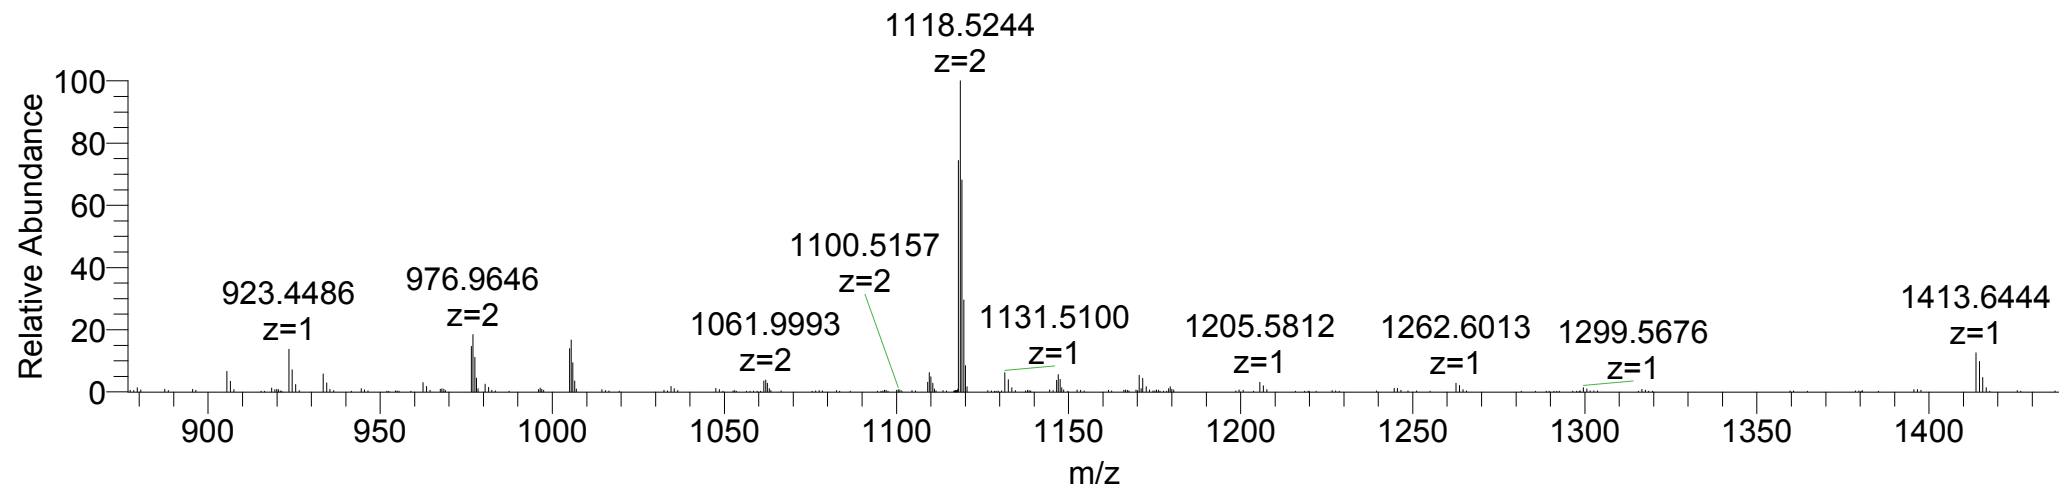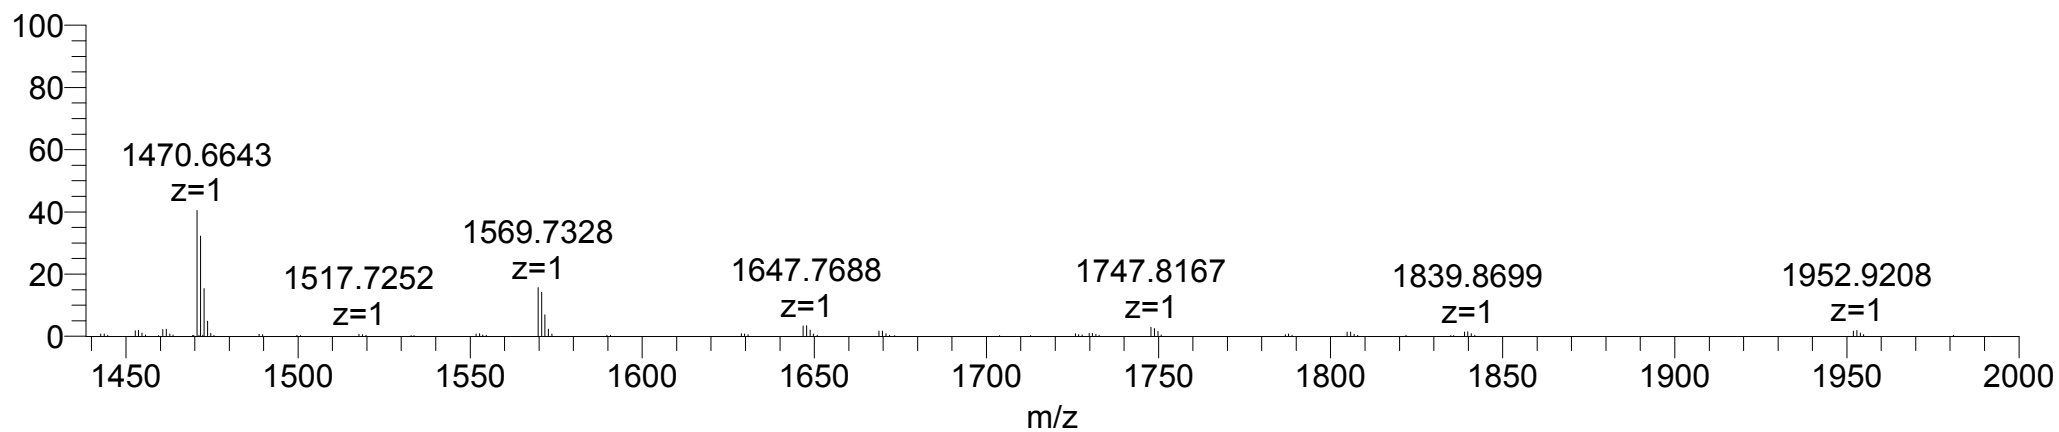

Human

30.

P1017-OH, P1019-OH, P1020-OH, P1023-OH, P1029-OH

#1015-1034: GHPPGPPPGPGEQGLPGLAGK

| Ion        | charge state | Theoretical m/z (mono) | Experimental m/z (mono) | Mass error (Da) | Mass error (PPM) |
|------------|--------------|------------------------|-------------------------|-----------------|------------------|
| [M+2H]+5OH | 2            | 950.4634               | 950.4630                | -0.0008         | -0.4             |
| y6+OH      | 1            | 558.3246               | 558.3246                | 0.0000          | 0.0              |
| y8+OH      | 1            | 728.4301               | 728.4294                | -0.0007         | -1.0             |
| y16+4OH    | 2            | 768.3886               | 768.3891                | 0.0010          | 0.7              |
| y17+4OH    | 2            | 796.8994               | 796.8975                | -0.0038         | -2.4             |
| y18+5OH    | 2            | 853.4232               | 853.4229                | -0.0006         | -0.4             |
| b11+4OH    | 1            | 1044.4381              | 1044.4385               | 0.0004          | 0.4              |
| y12+2OH    | 1            | 1155.6004              | 1155.6088               | 0.0084          | 7.3              |
| y13+2OH    | 1            | 1252.6532              | 1252.6522               | -0.0010         | -0.8             |
| b14+4OH    | 1            | 1342.6022              | 1342.6029               | 0.0007          | 0.5              |
| y15+3OH    | 1            | 1422.7223              | 1422.7190               | -0.0033         | -2.3             |
| y16+4OH    | 1            | 1535.7700              | 1535.7655               | -0.0045         | -2.9             |
| y17+4OH    | 1            | 1592.7915              | 1592.7892               | -0.0023         | -1.4             |
| b17+5OH    | 1            | 1625.7554              | 1625.7533               | -0.0021         | -1.3             |
| y18+5OH    | 1            | 1705.8392              | 1705.8480               | 0.0088          | 5.2              |

10\_7\_2011Collagen\_Trypsin\_MS3\_CIDandHCD #2507 RT: 22.17 AV: 1 NL: 4.74E5

T: FTMS + c NSI d Full ms2 950.46@cid35.00 [250.00-1915.00]

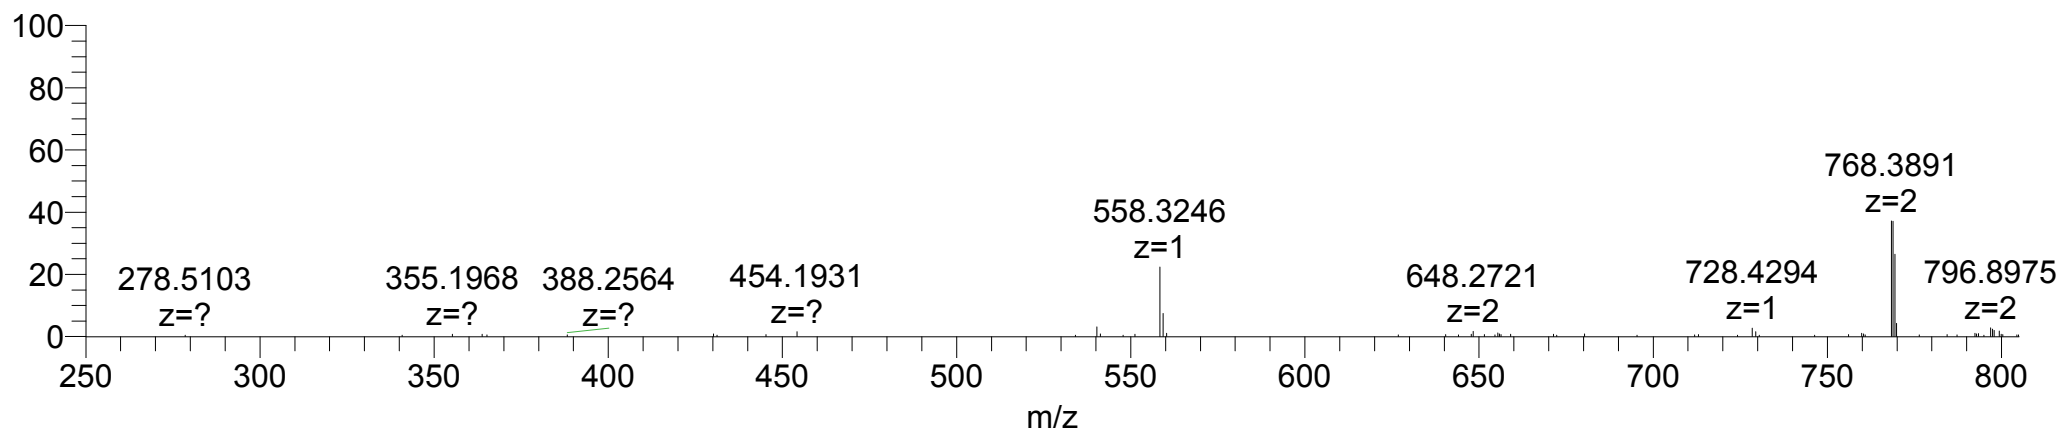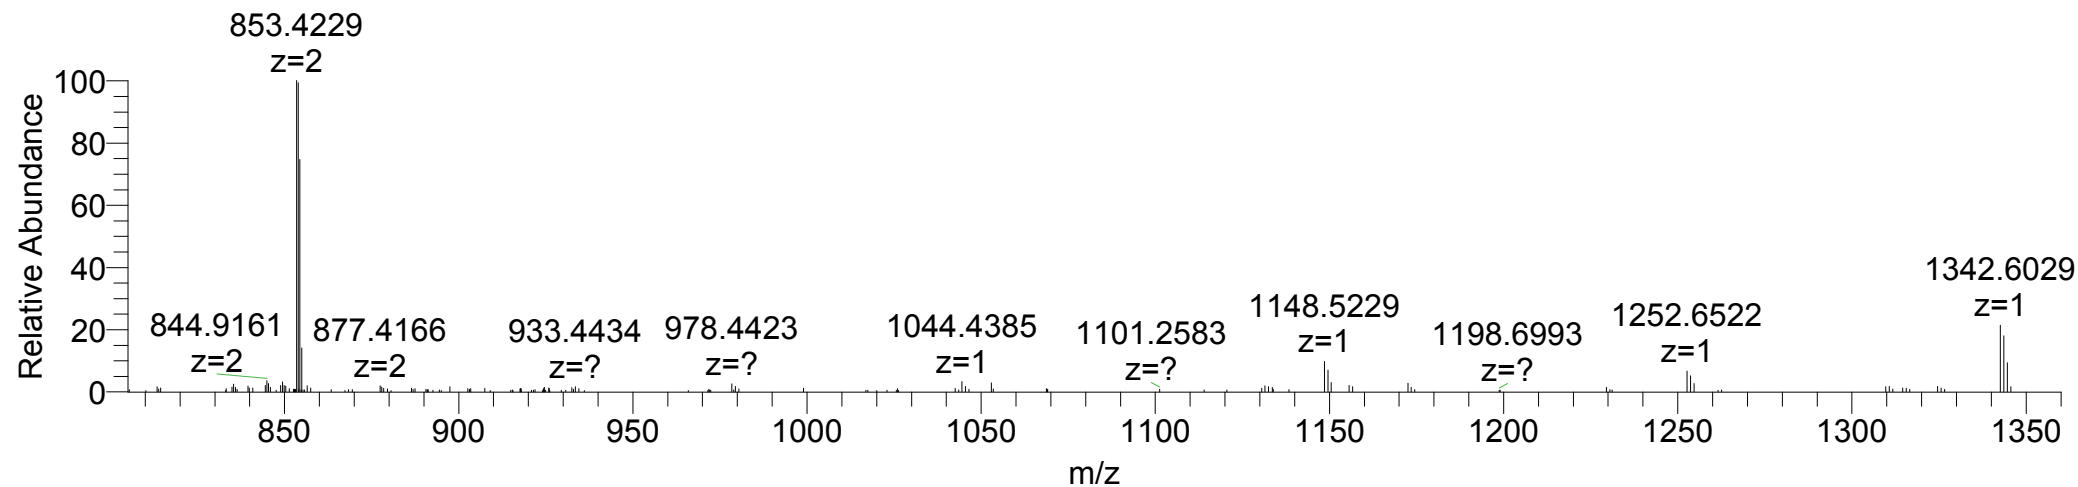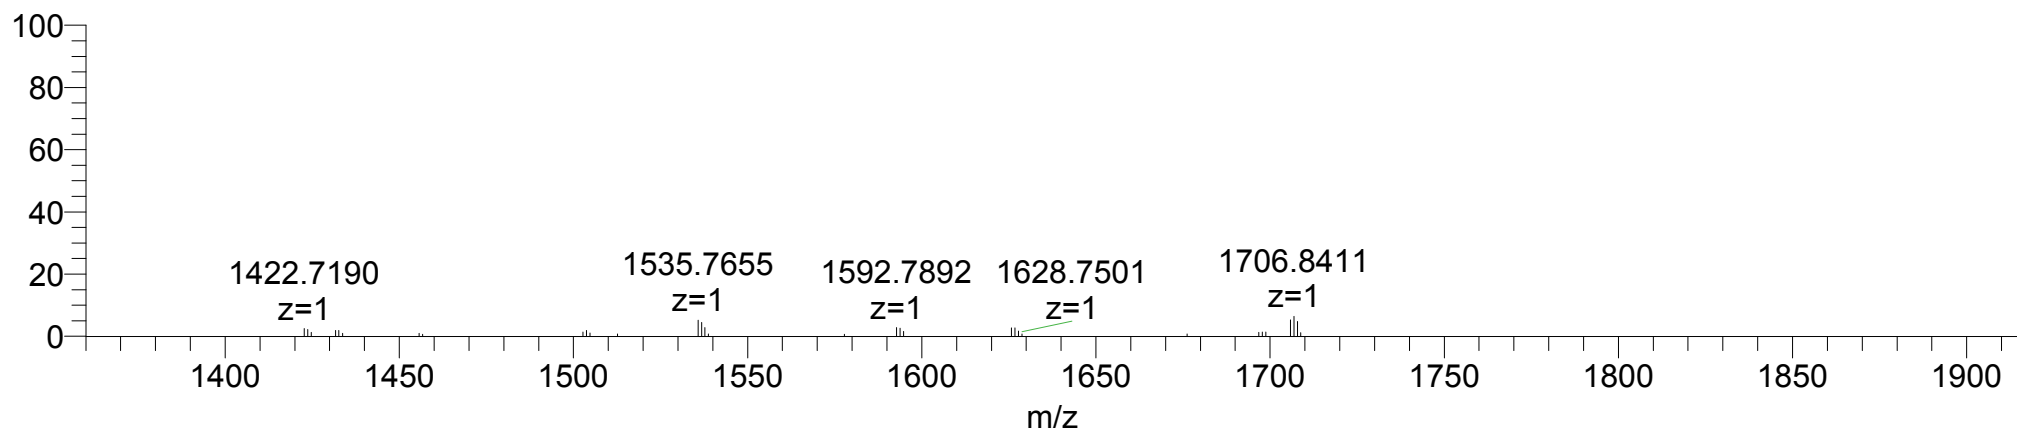

Human

31.

**K1038-OH, P1041-OH, P1047-OH**

#1035-1049: EGTKGDPPGPAGLPGK

MS<sup>2</sup>: EGTKGDPPGPAGLPGK

| Ion                     | charge state | Theoretical m/z (mono) | Experimental m/z (mono) | Mass error (Da) | Mass error (PPM) |
|-------------------------|--------------|------------------------|-------------------------|-----------------|------------------|
| MH+3OH                  | 3            | 476.9037               | 476.9025                | -0.0036         | -2.5             |
| y3+OH                   | 1            | 317.1819               | 317.1818                | -0.0001         | -0.3             |
| y7+OH(MS <sup>3</sup> ) | 2            | 328.1923               | 328.1919                | -0.0008         | -1.2             |
| b8-H2O+2OH              | 2            | 378.6616               | 378.6612                | -0.0008         | -1.1             |
| y9+2OH                  | 2            | 413.2269               | 413.2263                | -0.0012         | -1.5             |
| b9-H2O+2OH              | 2            | 427.1880               | 427.1874                | -0.0012         | -1.4             |
| b10-H2O+2OH             | 2            | 462.7065               | 462.7062                | -0.0006         | -0.6             |
| y5+OH                   | 1            | 487.2875               | 487.2871                | -0.0004         | -0.8             |
| y11+2OH                 | 2            | 499.2511               | 499.2506                | -0.0010         | -1.0             |
| b12-H2O+2OH             | 2            | 547.7593               | 547.7582                | -0.0022         | -2.0             |
| y6+OH                   | 1            | 558.3246               | 558.3245                | -0.0001         | -0.2             |
| b6-H2O+OH               | 1            | 586.2467               | 586.2455                | -0.0012         | -2.1             |
| y7+OH                   | 1            | 655.3774               | 655.3771                | -0.0003         | -0.5             |
| b8-2H2O+2OH             | 1            | 738.3053               | 738.3036                | -0.0017         | -2.3             |
| b8-H2O+2OH              | 1            | 756.3159               | 756.3145                | -0.0014         | -1.9             |

MS<sup>3</sup>: PAGLPGK

| Ion       | charge state | Theoretical m/z (mono) | Experimental m/z (mono) | Mass error (Da) | Mass error (PPM) |
|-----------|--------------|------------------------|-------------------------|-----------------|------------------|
| y1        | 1            | 147.1128               | 147.1125                | -0.0003         | -2.1             |
| b2        | 1            | 169.0972               | 169.0969                | -0.0003         | -1.8             |
| b3        | 1            | 226.1186               | 226.1183                | -0.0003         | -1.3             |
| y3+OH     | 1            | 317.1815               | 317.1819                | 0.0004          | 1.3              |
| [M+2H]+OH | 2            | 328.1923               | 328.1916                | -0.0014         | -2.1             |
| y5+OH     | 1            | 487.2875               | 487.2867                | -0.0008         | -1.6             |
| y6+OH     | 1            | 558.3246               | 558.3237                | -0.0009         | -1.6             |

11\_9\_2011Col5a1\_Trypsin\_MS3\_CIDandHCD\_micro4 #591 RT: 10.04 AV: 1 NL: 4.50E5

T: FTMS + c NSI d Full ms2 476.90@cid35.00 [120.00-1445.00]

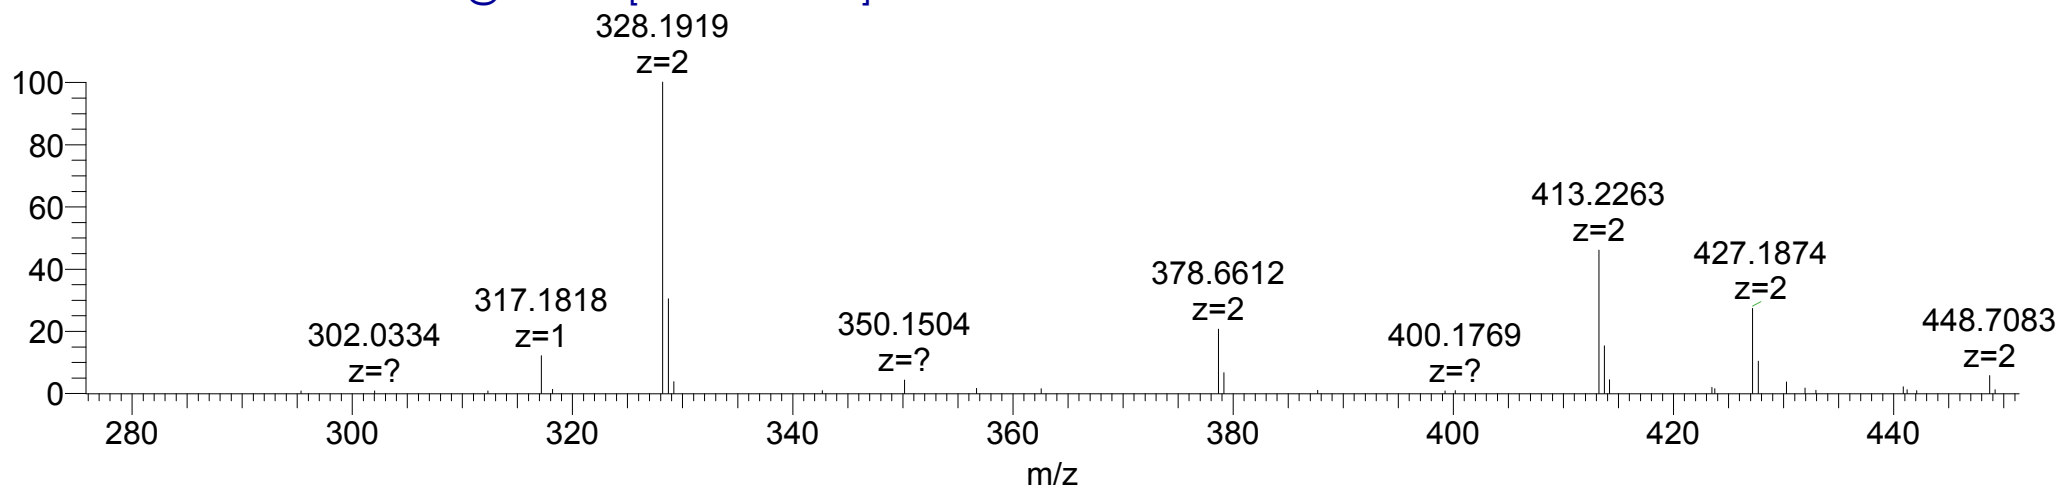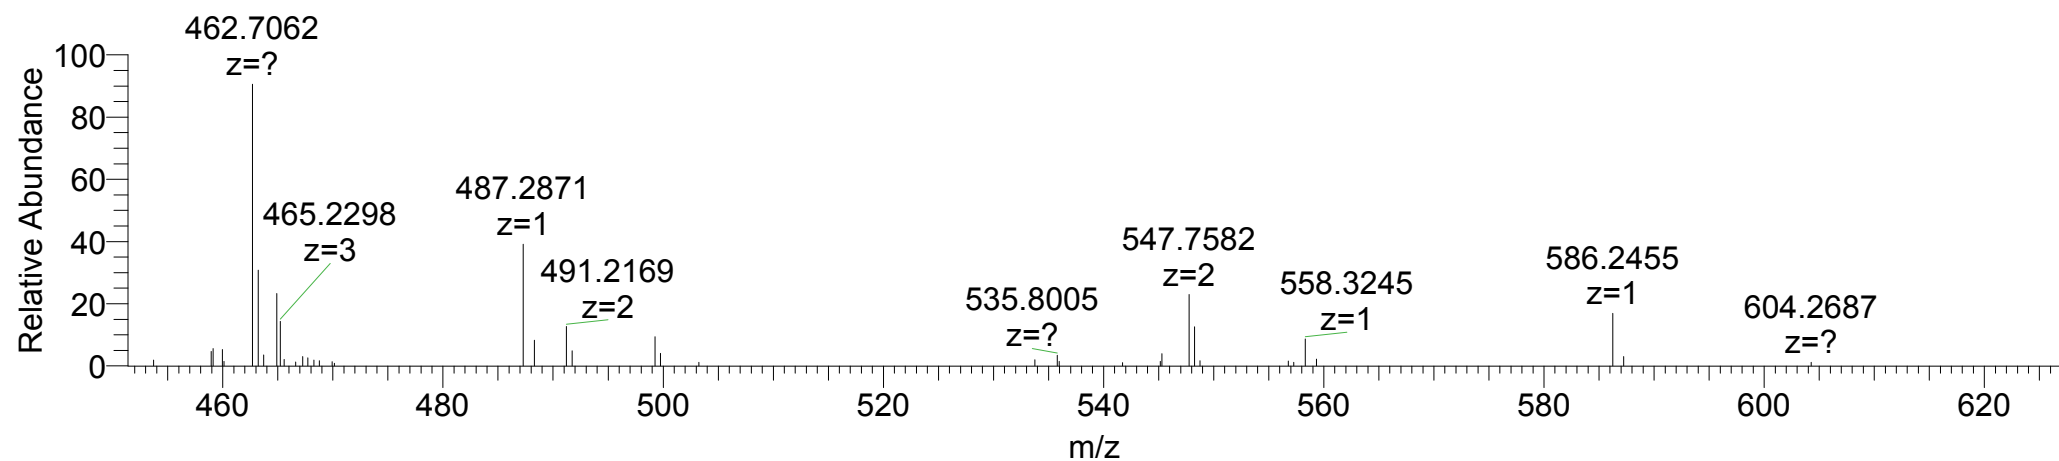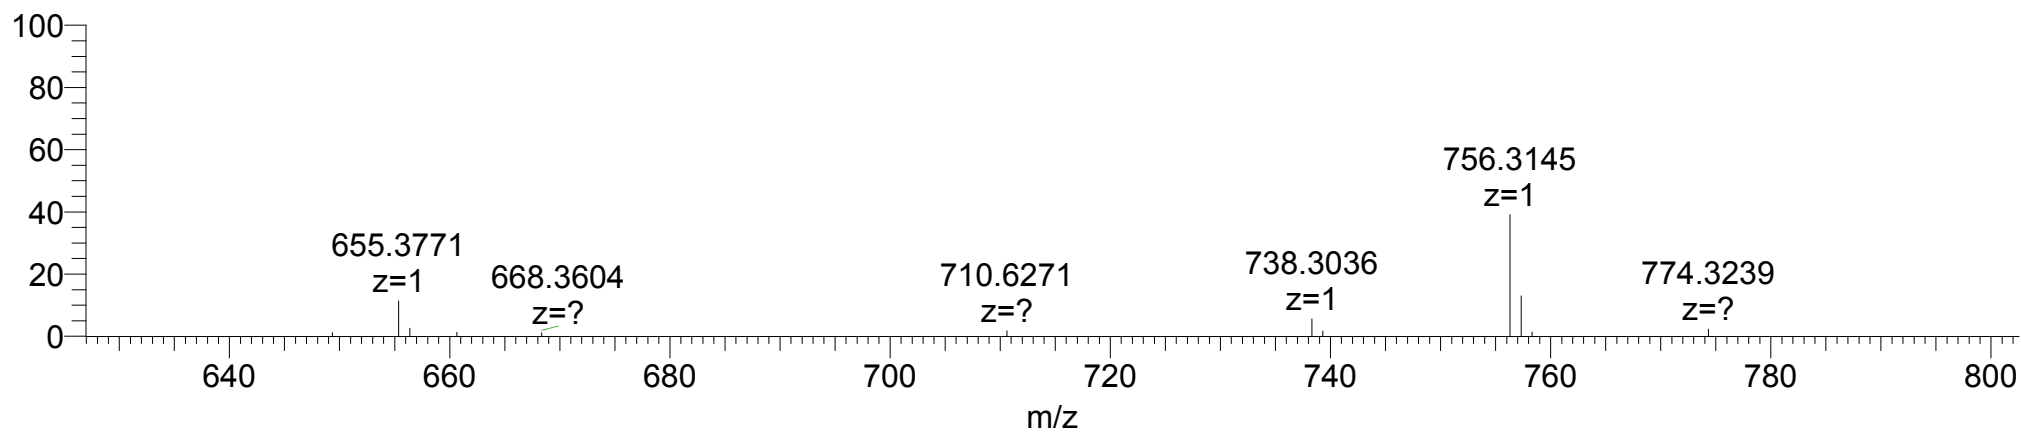

11\_9\_2011Col5a1\_Trypsin\_MS3\_CIDandHCD\_micro4 #592 RT: 10.05 AV: 1 NL: 1.69E5

T: FTMS + c NSI d Full ms3 476.90@cid35.00 328.19@hcd30.00 [110.00-670.00]

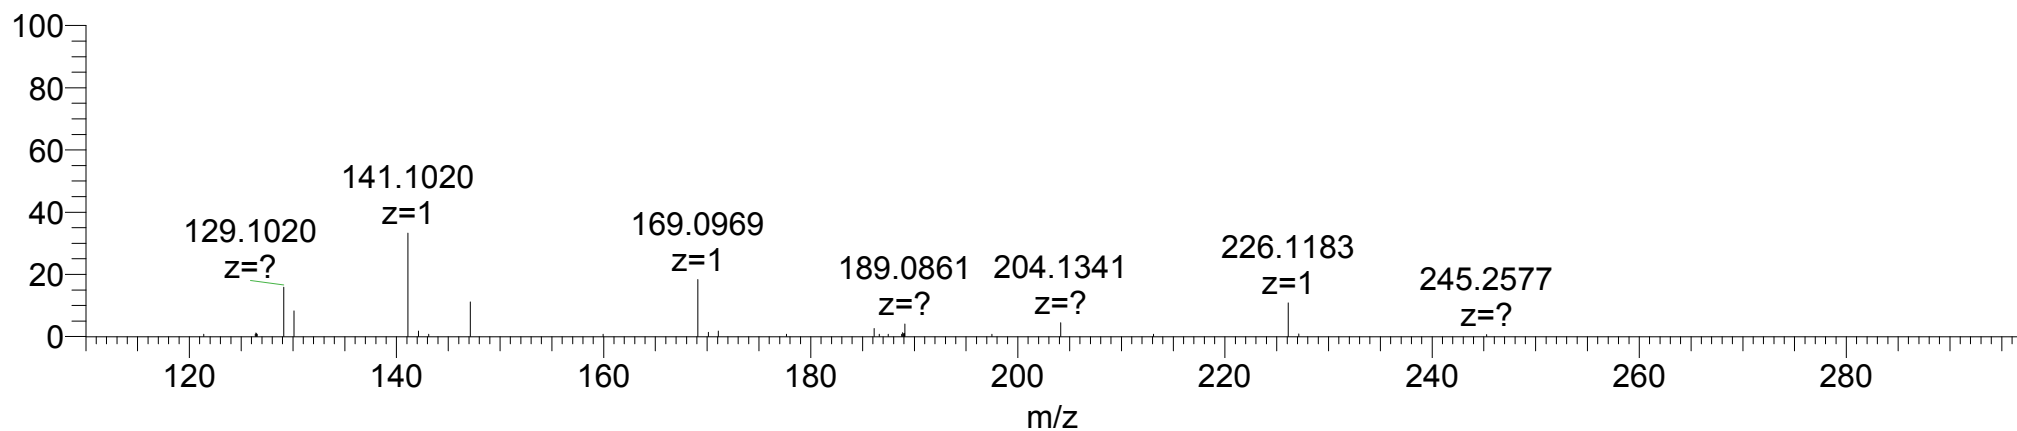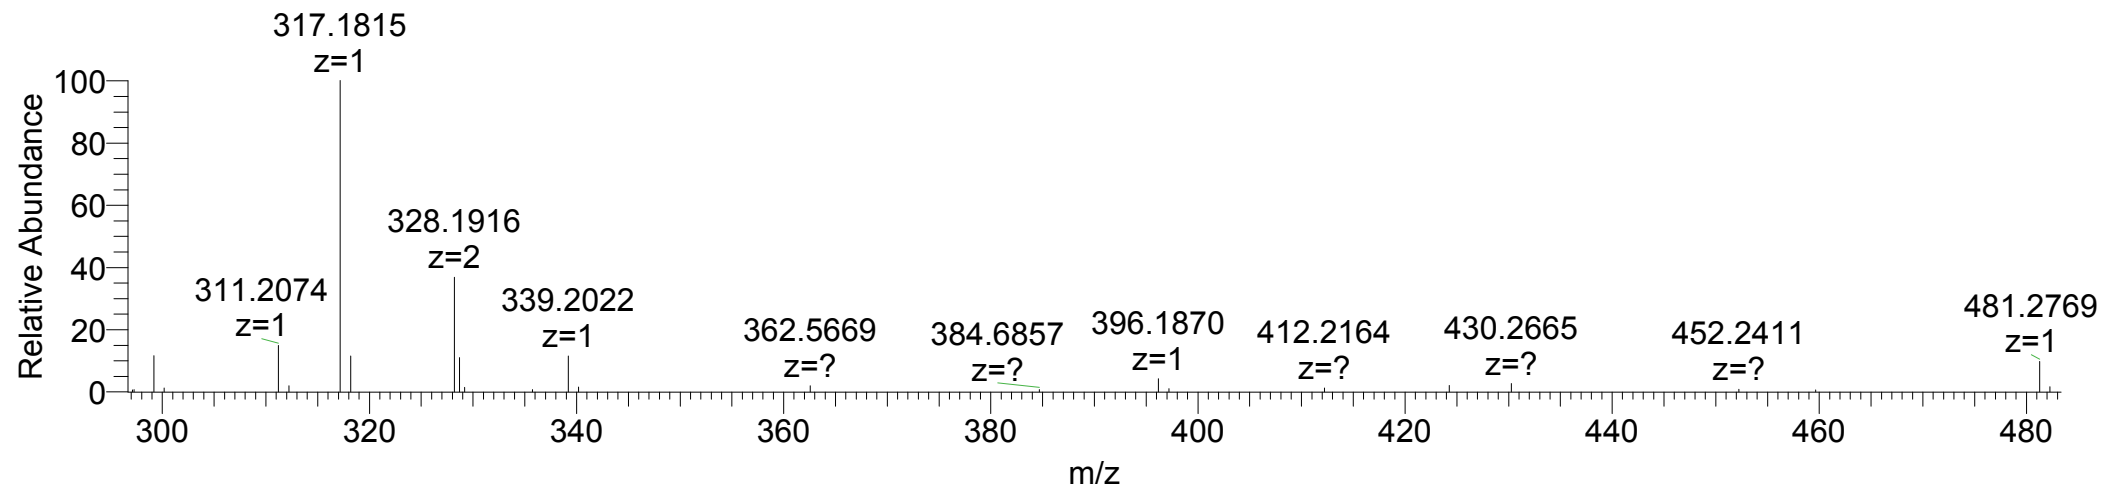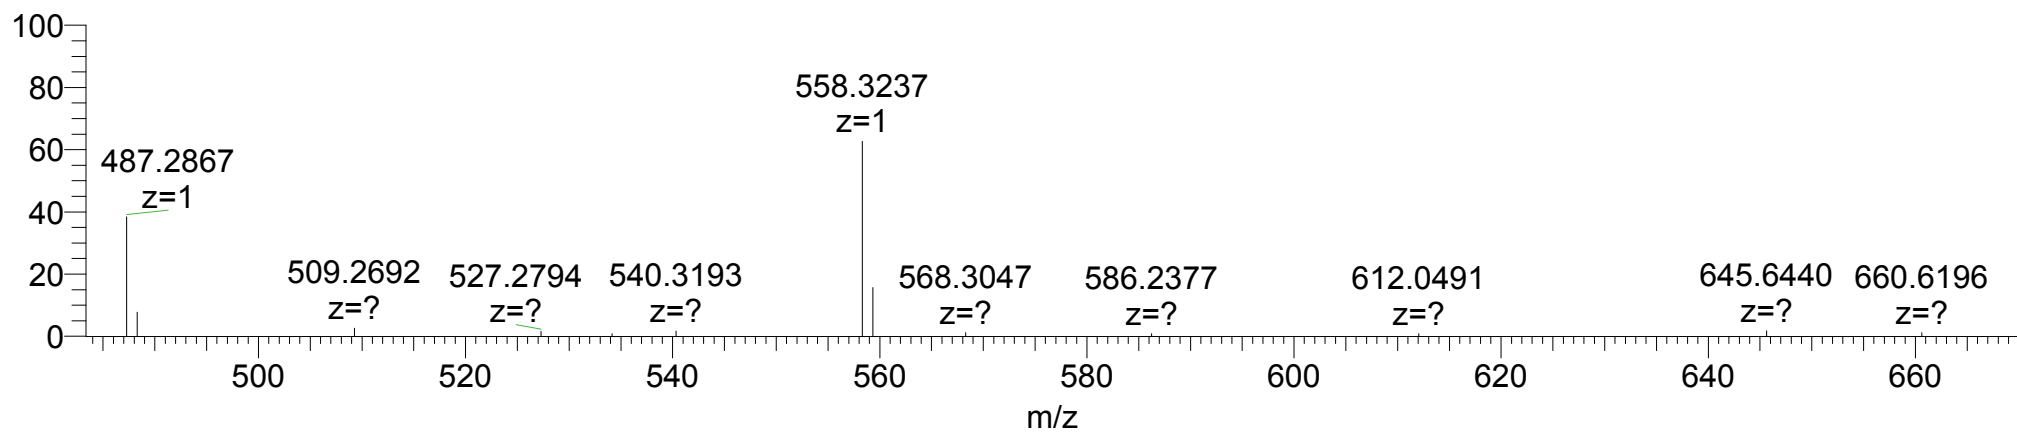

Human

**32.**

**K1038-OH.Gal.Glc, P1047-OH**

#1035-1049: EGTKGDPGPAGLPGK

| Ion                | charge state | Theoretical m/z (mono) | Experimental m/z (mono) | Mass error (Da) | Mass error (PPM) |
|--------------------|--------------|------------------------|-------------------------|-----------------|------------------|
| [M+3H]+2OH+Gal.Glc | 3            | 579.6073               | 579.6051                | -0.0066         | -3.8             |
| K                  | 1            | 129.1022               | 129.1022                | 0.0000          | 0.0              |
| y2                 | 1            | 204.1343               | 204.1342                | -0.0001         | -0.5             |
| PAG                | 1            | 226.1186               | 226.1183                | -0.0003         | -1.3             |
| y3+OH              | 1            | 317.1819               | 317.1816                | -0.0003         | -0.9             |
| y7+OH              | 2            | 328.1923               | 328.1918                | -0.0010         | -1.5             |
| y9+OH              | 2            | 405.2294               | 405.2293                | -0.0002         | -0.2             |
| y5+OH              | 1            | 487.2875               | 487.2871                | -0.0004         | -0.8             |
| y6+OH              | 1            | 558.3246               | 558.3240                | -0.0006         | -1.1             |
| b6-H2O+OH          | 1            | 586.2467               | 586.2448                | -0.0019         | -3.2             |
| b6+OH              | 1            | 604.2573               | 604.2564                | -0.0009         | -1.5             |
| y7+OH              | 1            | 655.3774               | 655.3771                | -0.0003         | -0.5             |
| y8+OH              | 1            | 712.3988               | 712.3977                | -0.0011         | -1.5             |
| b8-H2O+OH          | 1            | 740.3210               | 740.3199                | -0.0011         | -1.5             |
| b8+OH              | 1            | 758.3315               | 758.3307                | -0.0008         | -1.1             |
| y9+OH              | 1            | 809.4516               | 809.4512                | -0.0004         | -0.5             |
| y11+OH             | 1            | 981.5000               | 981.4988                | -0.0012         | -1.2             |
| b12-H2O+OH         | 1            | 1078.5164              | 1078.5137               | -0.0027         | -2.5             |

10\_7\_2011Collagen\_Trypsin\_HCDandETD\_111009033323 #1654 RT: 14.54 AV: 1 NL: 4.14E6

T: FTMS + c NSI d Full ms2 579.61@hcd35.00 [100.00-1750.00]

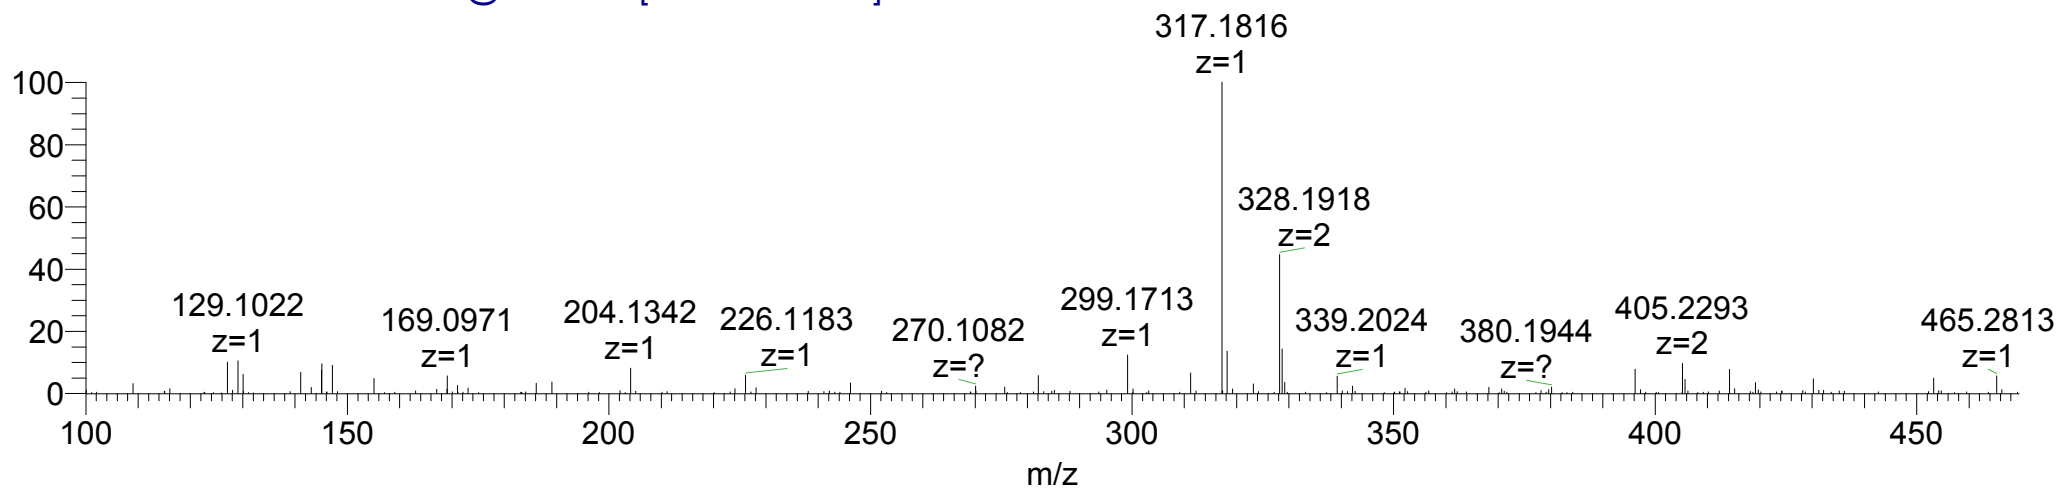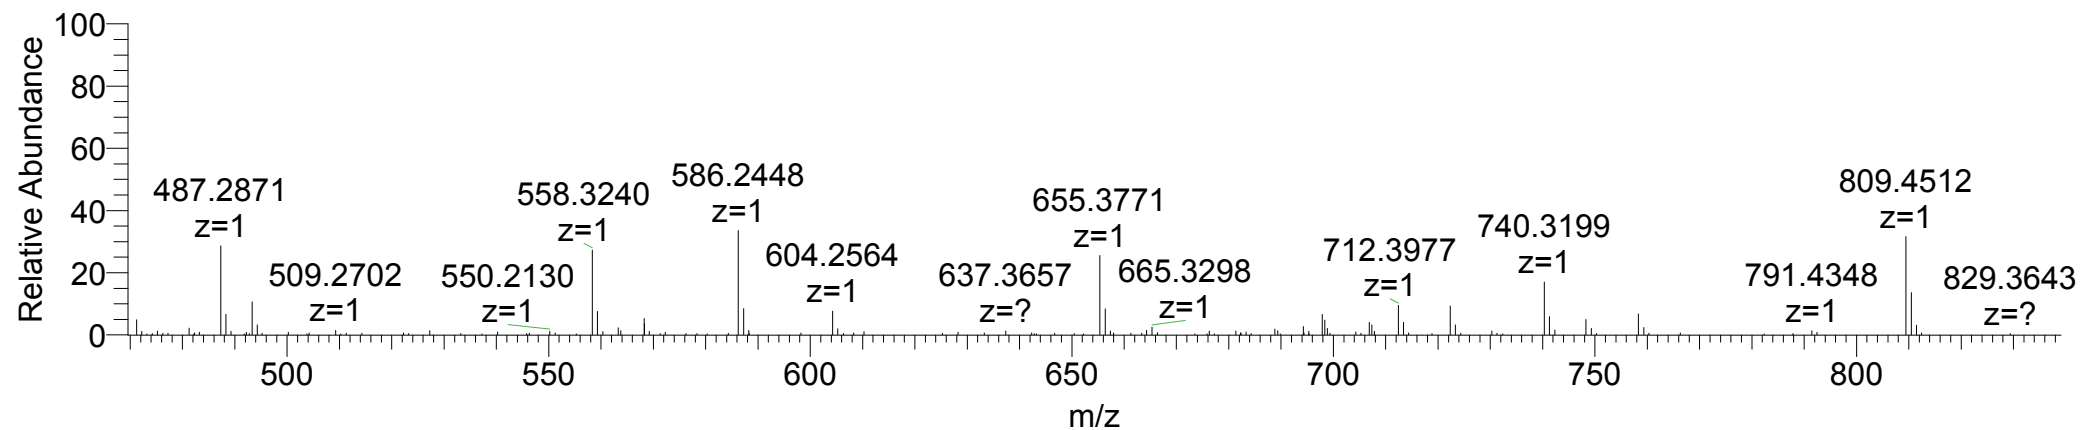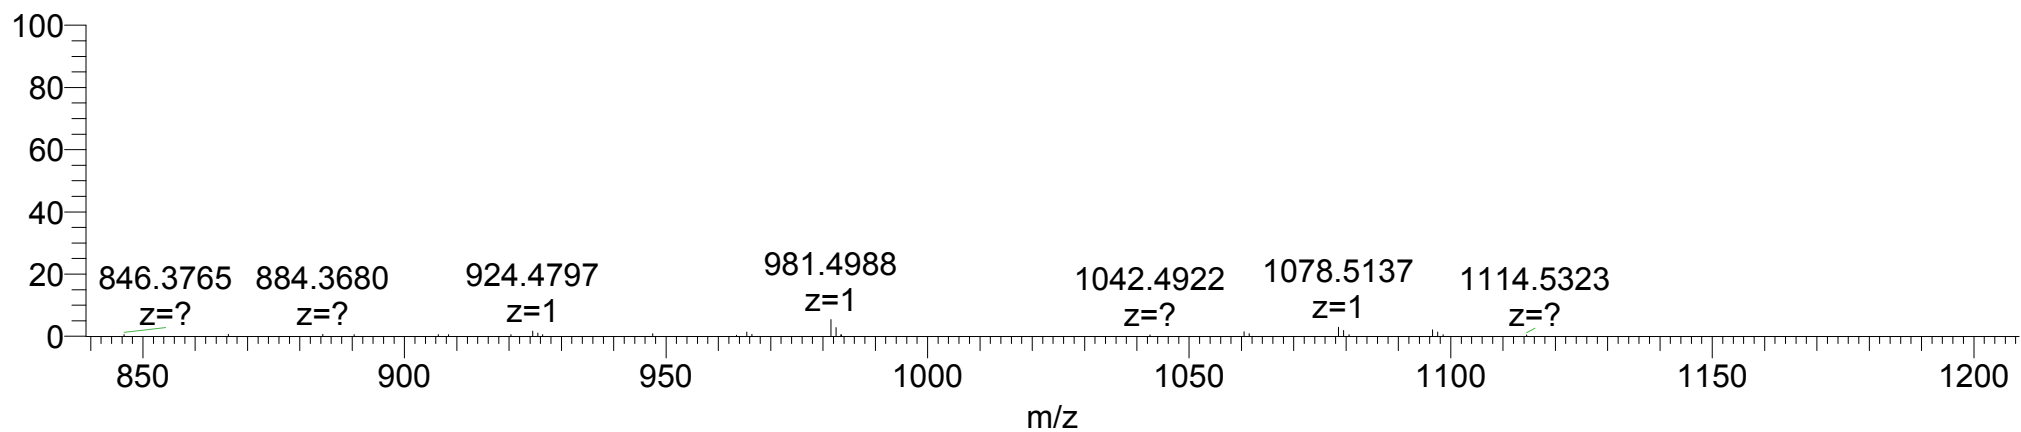



Human

**33.**

**P1053-OH, P1059-OH**

#1050-1060: DGPPGLRGFPG

| Ion         | charge state | Theoretical m/z (mono) | Experimental m/z (mono) | Mass error (Da) | Mass error (PPM) |
|-------------|--------------|------------------------|-------------------------|-----------------|------------------|
| [M+2H]+2OH  | 2            | 551.2698               | 551.2687                | -0.0022         | -2.0             |
| y2+OH       | 1            | 189.0870               | 189.0869                | -0.0001         | -0.5             |
| b3          | 1            | 270.1084               | 270.1083                | -0.0001         | -0.4             |
| y8+2OH      | 2            | 416.7192               | 416.7193                | 0.0002          | 0.2              |
| y9+2OH      | 2            | 465.2456               | 465.2455                | -0.0002         | -0.2             |
| y5+OH       | 1            | 549.2780               | 549.2783                | 0.0003          | 0.5              |
| GLRGFP+OH   | 1            | 644.3515               | 644.3500                | -0.0015         | -2.3             |
| y7+OH       | 1            | 719.3835               | 719.3835                | 0.0000          | 0.0              |
| GPPGLRGF+OH | 1            | 798.4257               | 798.4259                | 0.0002          | 0.3              |
| y8+2OH      | 1            | 832.4312               | 832.4304                | -0.0008         | -1.0             |
| a9+OH       | 1            | 885.4577               | 885.4572                | -0.0005         | -0.6             |
| b9+OH       | 1            | 913.4526               | 913.4520                | -0.0006         | -0.7             |

11\_9\_2011Col5a1\_AspN\_HCD1 #4606 RT: 27.66 AV: 1 NL: 1.35E7

T: FTMS + c NSI d Full ms2 551.27@hcd30.00 [110.00-1115.00]

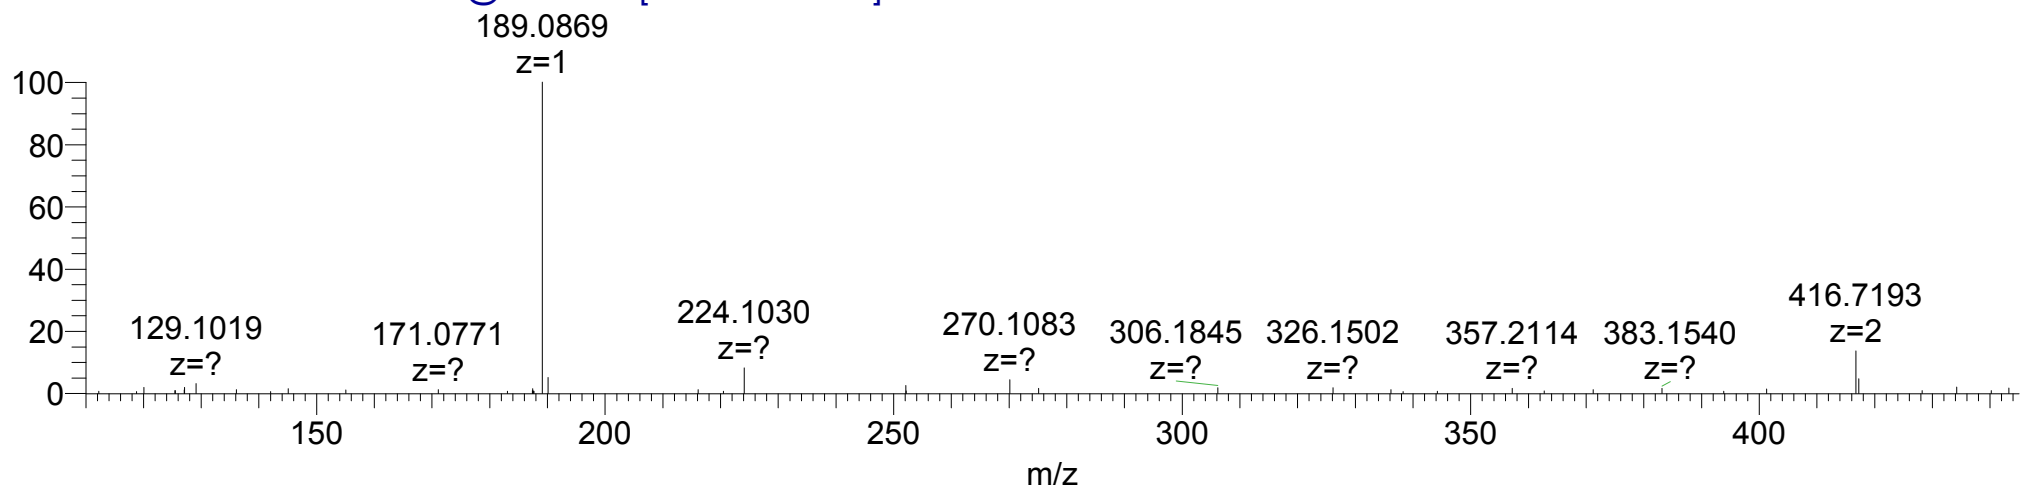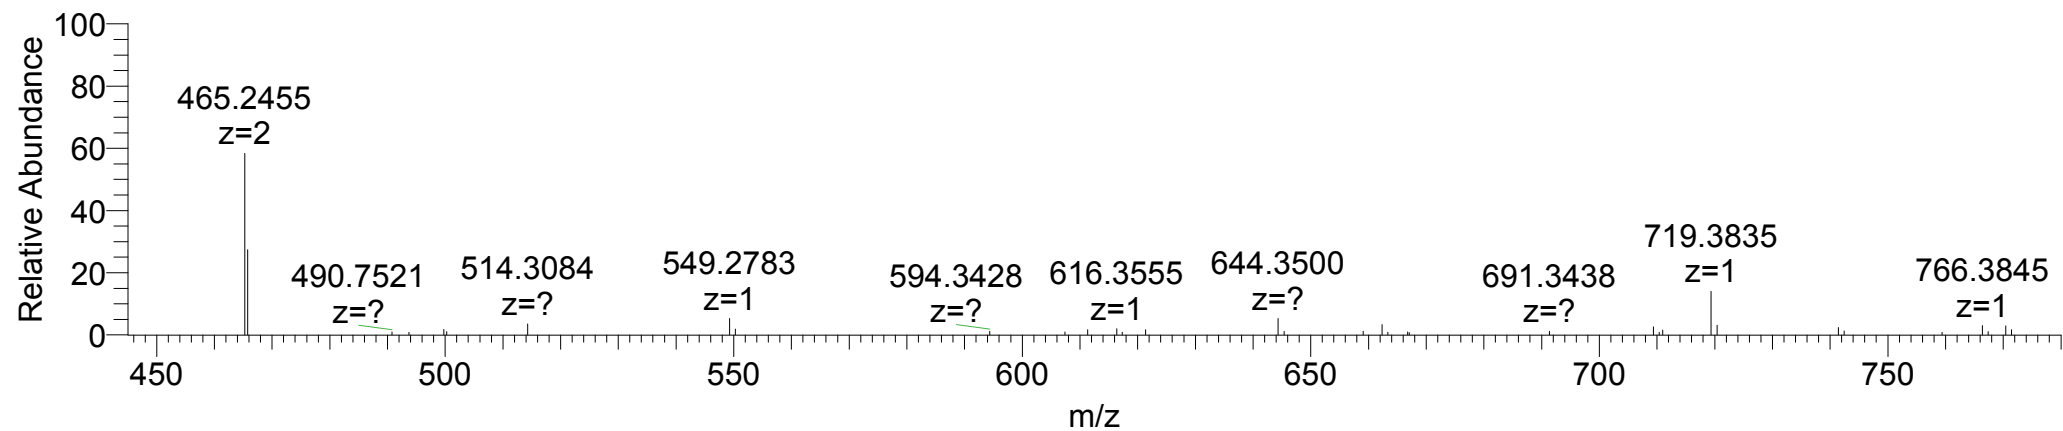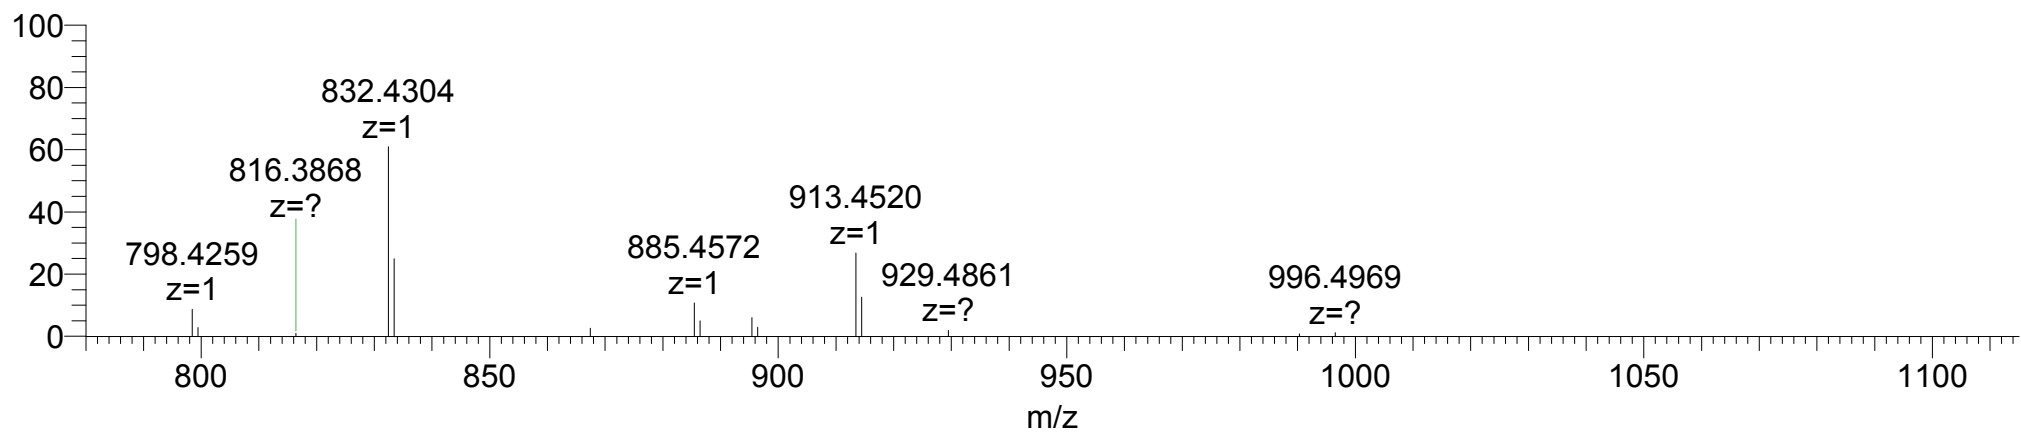

Human

**34.**

**P1065-OH**

#1063-1074: GLPGPVGALGLK

| Ion        | charge state | Theoretical m/z (mono) | Experimental m/z (mono) | Mass error (Da) | Mass error (PPM) |
|------------|--------------|------------------------|-------------------------|-----------------|------------------|
| [M+2H]+OH  | 2            | 547.8320               | 547.8282                | -0.0076         | -6.9             |
| PG+OH      | 1            | 171.0764               | 171.0752                | -0.0012         | -7.1             |
| y3         | 1            | 317.2183               | 317.2157                | -0.0026         | -8.2             |
| PGPV-28+OH | 1            | 339.2027               | 339.2000                | -0.0027         | -8.0             |
| PGPV+OH    | 1            | 367.1976               | 367.1948                | -0.0028         | -7.6             |
| y8         | 2            | 377.7447               | 377.7419                | -0.0056         | -7.4             |
| y9         | 2            | 406.2554               | 406.2524                | -0.0060         | -7.4             |
| y10+OH     | 2            | 462.7793               | 462.7758                | -0.0070         | -7.6             |
| y5         | 1            | 501.3395               | 501.3358                | -0.0037         | -7.4             |
| y6         | 1            | 558.3610               | 558.3564                | -0.0046         | -8.3             |
| y7         | 1            | 657.4294               | 657.4243                | -0.0051         | -7.8             |
| y8         | 1            | 754.4822               | 754.4763                | -0.0059         | -7.8             |
| y9         | 1            | 811.5036               | 811.4968                | -0.0068         | -8.4             |
| y10+OH     | 1            | 924.5513               | 924.5449                | -0.0064         | -6.9             |

12\_9\_2011Col5a1\_Trypsin\_CE30\_nontrapping #7247 RT: 69.04 AV: 1 NL: 2.44E5

T: FTMS + c NSI d Full ms2 547.83@hcd30.00 [100.00-1110.00]

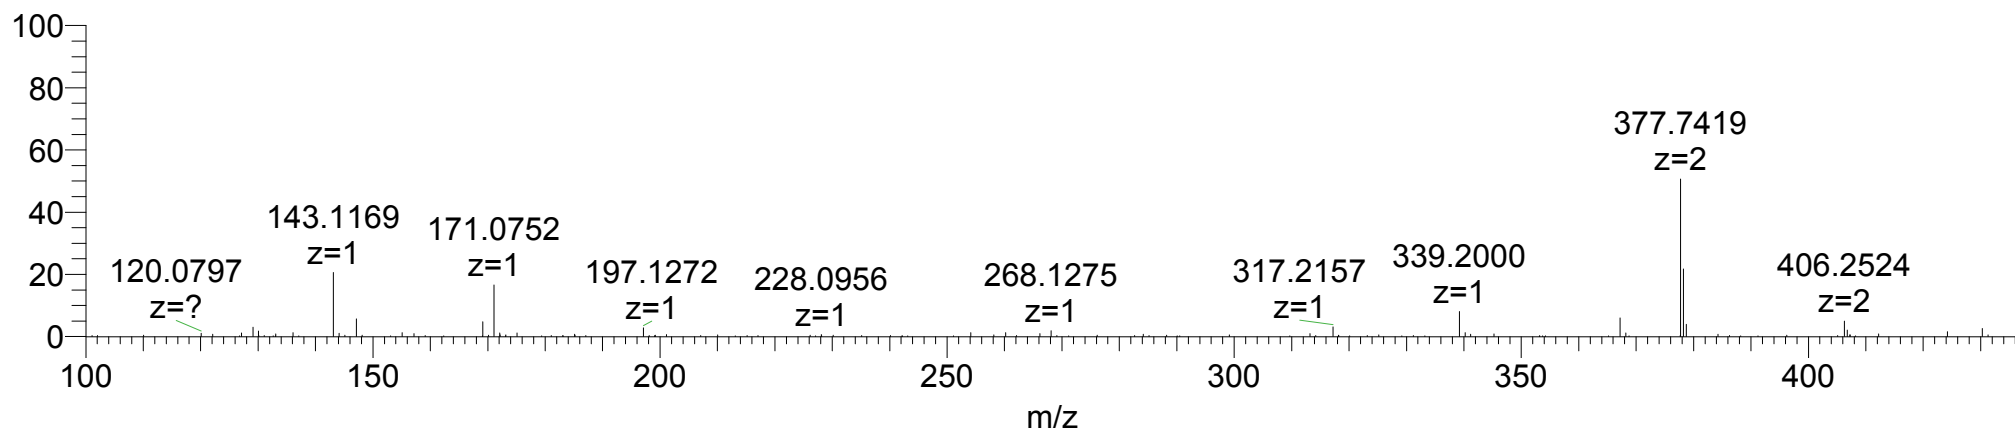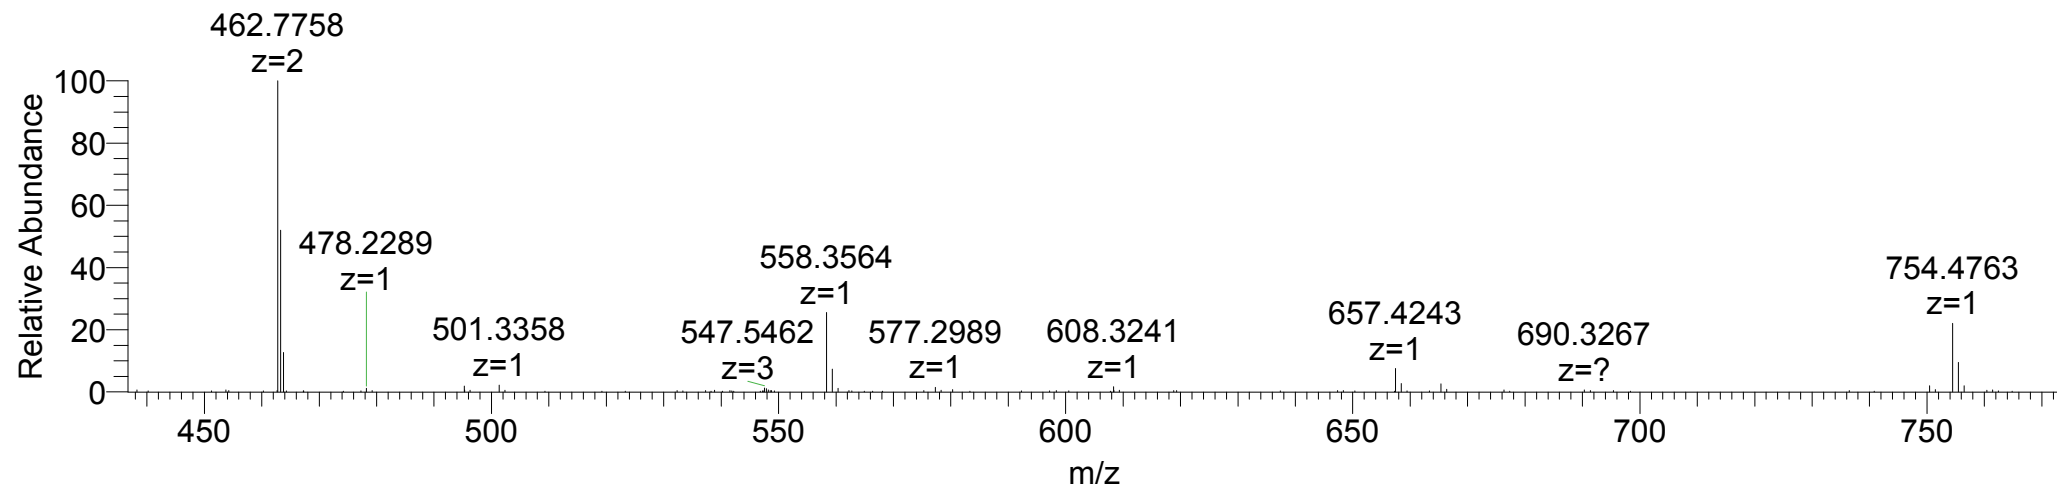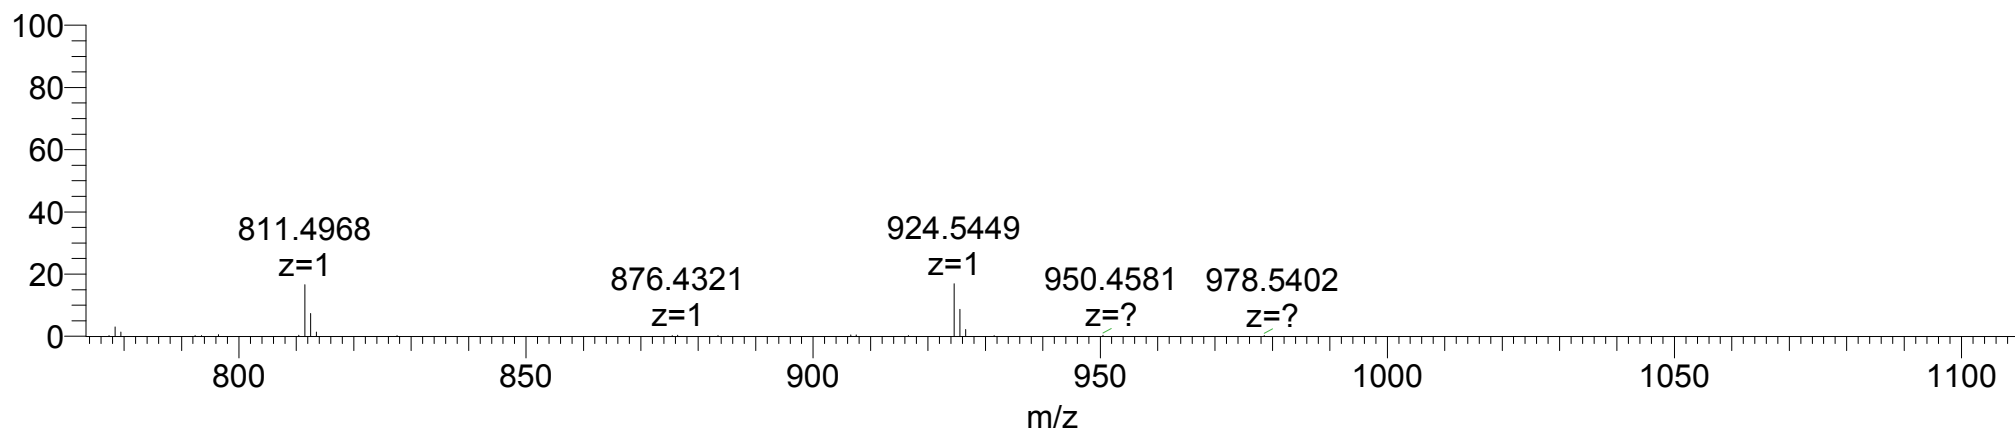

Human

**35.**

**K1074-OH.Gal.Glc, P1083-OH, P1089-OH**

#1063-1092: GLPGPVGALGLKNEGPPGPPGPAGSPPGER

| Ion                | charge state | Theoretical m/z (mono) | Experimental m/z (mono) | Mass error (Da) | Mass error (PPM) |
|--------------------|--------------|------------------------|-------------------------|-----------------|------------------|
| [M+4H]+4OH+Gal.Glc | 4            | 770.1282               | 770.1282                | 0.0000          | 0.0              |
| a2/GL-28           | 1            | 143.1179               | 143.1179                | 0.0000          | 0.0              |
| y4+OH              | 2            | 237.6190               | 237.6191                | 0.0002          | 0.4              |
| GPP+OH             | 1            | 268.1292               | 268.1287                | -0.0005         | -1.9             |
| PGPV+OH            | 1            | 367.1976               | 367.1973                | -0.0003         | -0.8             |
| y8+OH              | 2            | 393.6907               | 393.6903                | -0.0008         | -1.0             |
| y4+OH              | 1            | 474.2307               | 474.2300                | -0.0007         | -1.5             |
| y10+2OH            | 2            | 478.7252               | 478.7253                | 0.0002          | 0.2              |
| PGPVGA+OH          | 1            | 495.2562               | 495.2554                | -0.0008         | -1.6             |
| y11+2OH            | 2            | 527.2516               | 527.2510                | -0.0012         | -1.1             |
| y5+OH              | 1            | 561.2627               | 561.2633                | 0.0006          | 1.1              |
| y6+OH              | 1            | 618.2842               | 618.2826                | -0.0016         | -2.6             |
| y14+2OH            | 2            | 652.8151               | 652.8134                | -0.0034         | -2.6             |
| y7+OH              | 1            | 689.3213               | 689.3206                | -0.0007         | -1.0             |
| b9+OH              | 1            | 778.4458               | 778.4451                | -0.0007         | -0.9             |
| y8+OH              | 1            | 786.3741               | 786.3726                | -0.0015         | -1.9             |
| y9+OH              | 1            | 843.3955               | 843.3960                | 0.0005          | 0.6              |
| y10+OH             | 1            | 956.4432               | 956.4428                | -0.0004         | -0.4             |
| y11+2OH            | 1            | 1053.4960              | 1053.5020               | 0.0060          | 5.7              |

**\*Unlocalized sites: P1065-OH?, P1067-OH?**

**Pseudolocalized sites: P1065-OH**

10\_7\_2011Collagen\_Trypsin\_HCDandETD\_111009033323 #4987 RT: 33.34 AV: 1 NL: 1.77E4

T: FTMS + c NSI d Full ms2 770.38@hcd35.00 [100.00-2000.00]

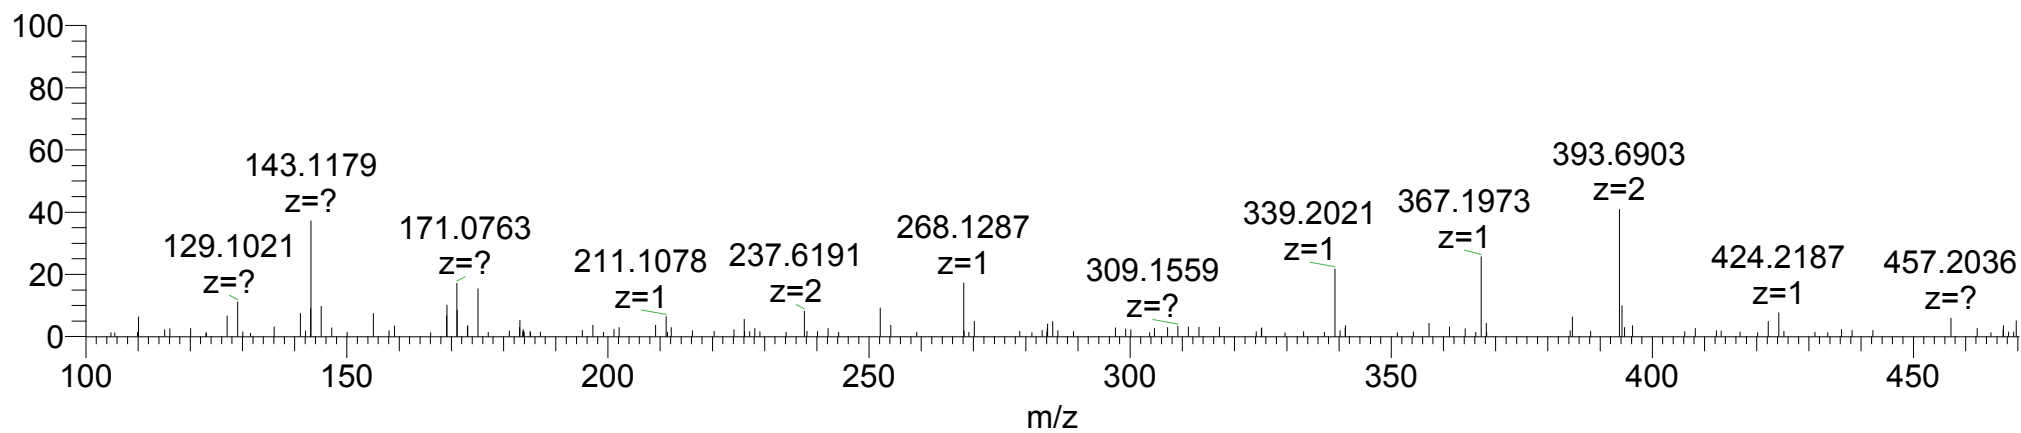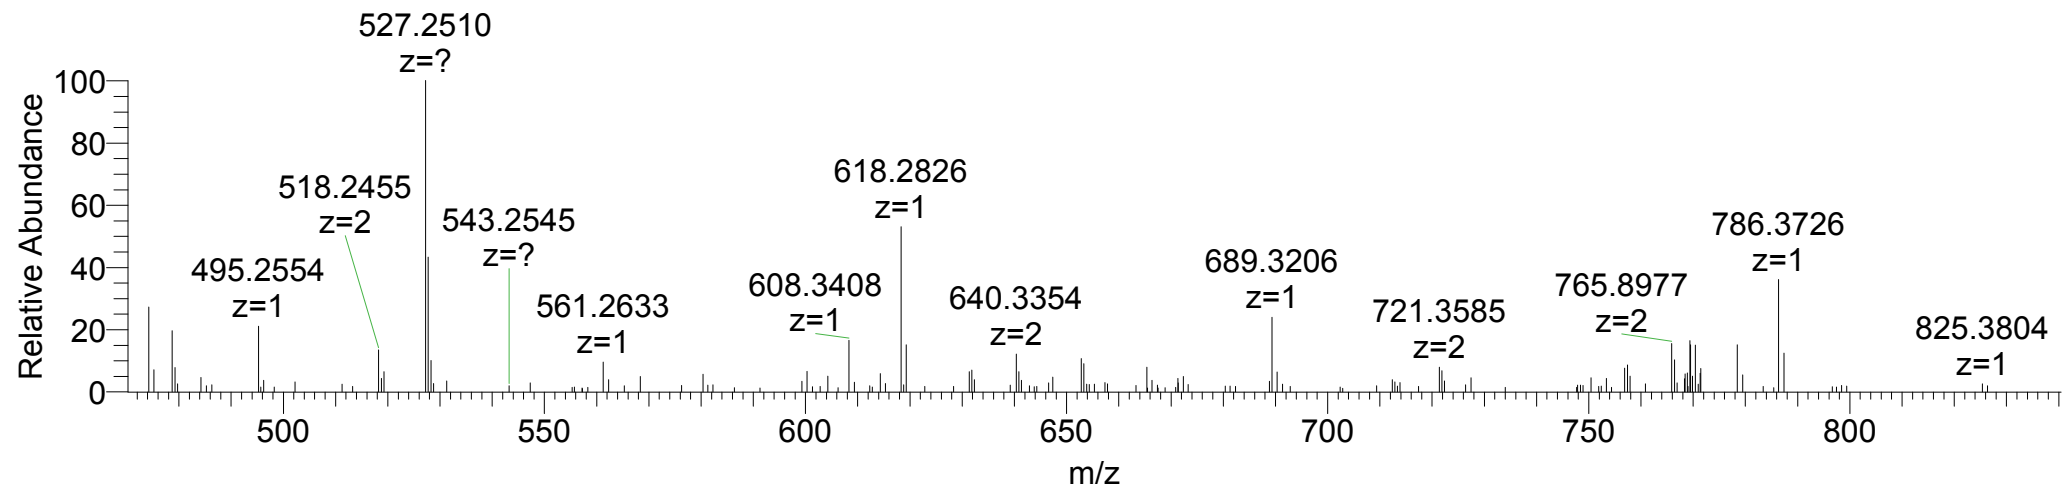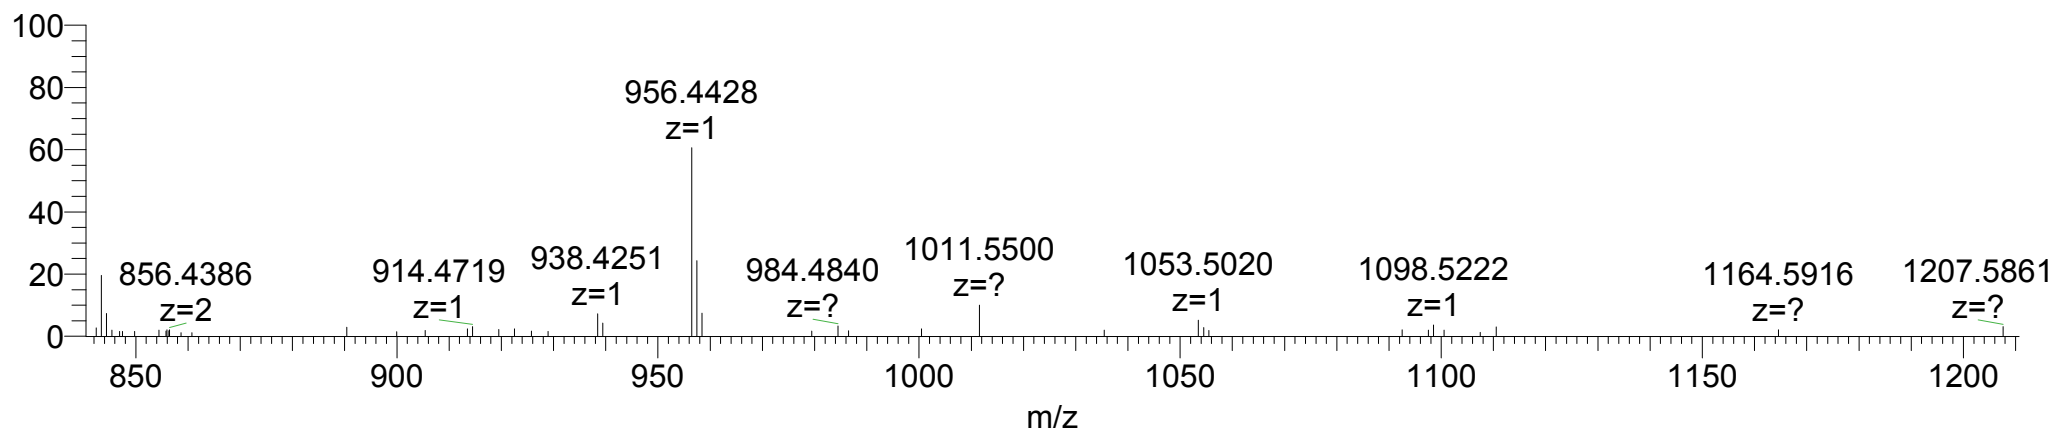

Human

36.

P1080-OH, P1083-OH, P1089-OH

#1075-1092: GNEGPPGPPGPAGSPGER

| Ion        | charge state | Theoretical m/z (mono) | Experimental m/z (mono) | Mass error (Da) | Mass error (PPM) |
|------------|--------------|------------------------|-------------------------|-----------------|------------------|
| [M+2H]+3OH | 2            | 839.3768               | 839.3705                | -0.0126         | -7.5             |
| y1         | 1            | 175.1190               | 175.1179                | -0.0011         | -6.3             |
| b4-NH3     | 1            | 341.1092               | 341.1067                | -0.0025         | -7.4             |
| y4+OH      | 1            | 474.2307               | 474.2276                | -0.0031         | -6.6             |
| y11+2OH    | 2            | 527.2516               | 527.2483                | -0.0066         | -6.3             |
| y5+OH      | 1            | 561.2627               | 561.2587                | -0.0040         | -7.1             |
| y13+3OH    | 2            | 612.2862               | 612.2823                | -0.0078         | -6.4             |
| y6+OH      | 1            | 618.2842               | 618.2802                | -0.0040         | -6.5             |
| y14+3OH    | 2            | 660.8126               | 660.8085                | -0.0082         | -6.2             |
| y15+3OH    | 2            | 689.3233               | 689.3182                | -0.0102         | -7.4             |
| y8+OH      | 1            | 786.3741               | 786.3693                | -0.0048         | -6.1             |
| y9+OH      | 1            | 843.3955               | 843.3898                | -0.0057         | -6.8             |
| y10+2OH    | 1            | 956.4432               | 956.4363                | -0.0069         | -7.2             |
| y11+2OH    | 1            | 1053.4960              | 1053.4899               | -0.0061         | -5.8             |
| y12+2OH    | 1            | 1110.5174              | 1110.5105               | -0.0069         | -6.2             |
| y13+3OH    | 1            | 1223.5651              | 1223.5568               | -0.0083         | -6.8             |
| y14+3OH    | 1            | 1320.6179              | 1320.6125               | -0.0054         | -4.1             |

12\_9\_2011Col5a1\_Trypsin\_CE35 #1362 RT: 13.25 AV: 1 NL: 1.10E5

T: FTMS + c NSI d Full ms2 839.37@hcd35.00 [100.00-1690.00]

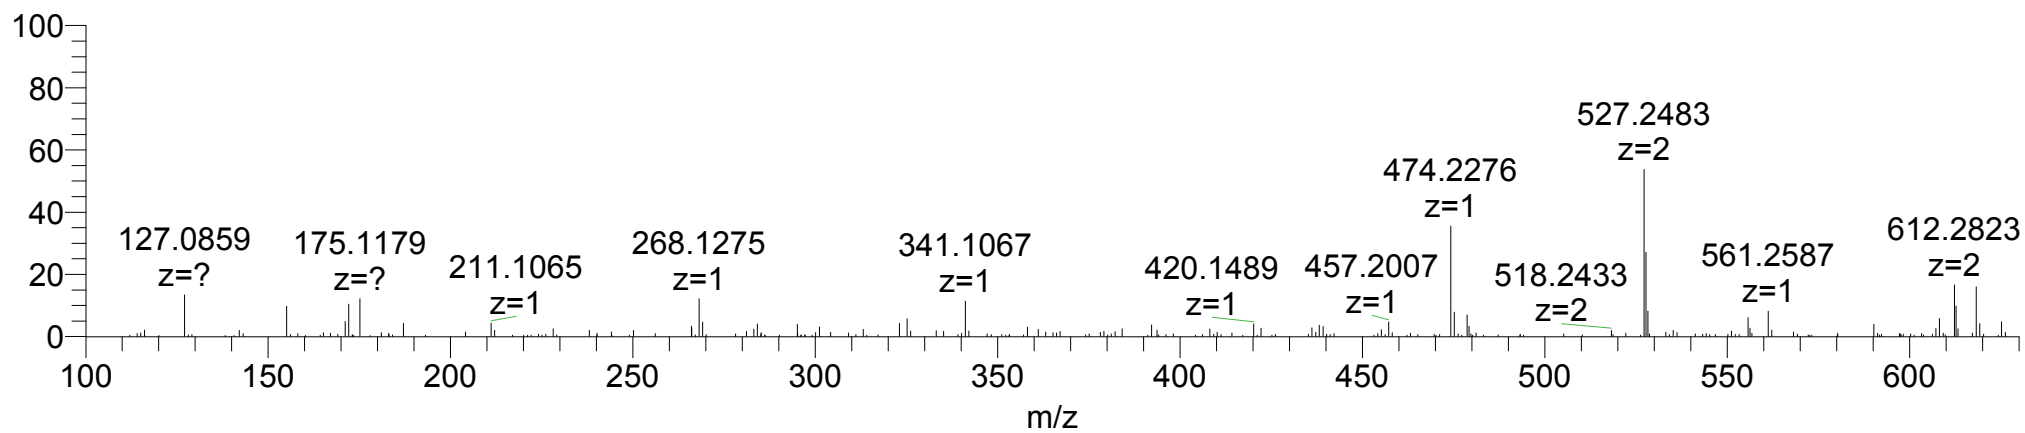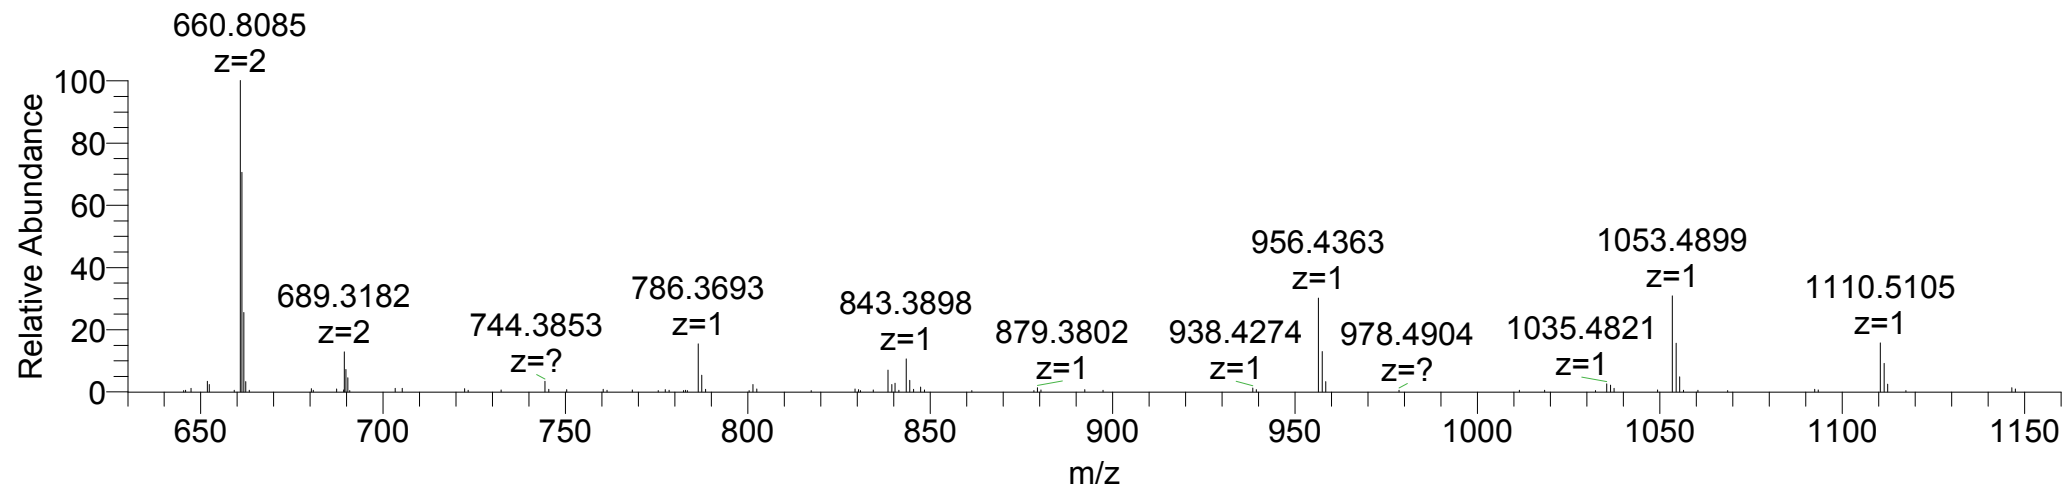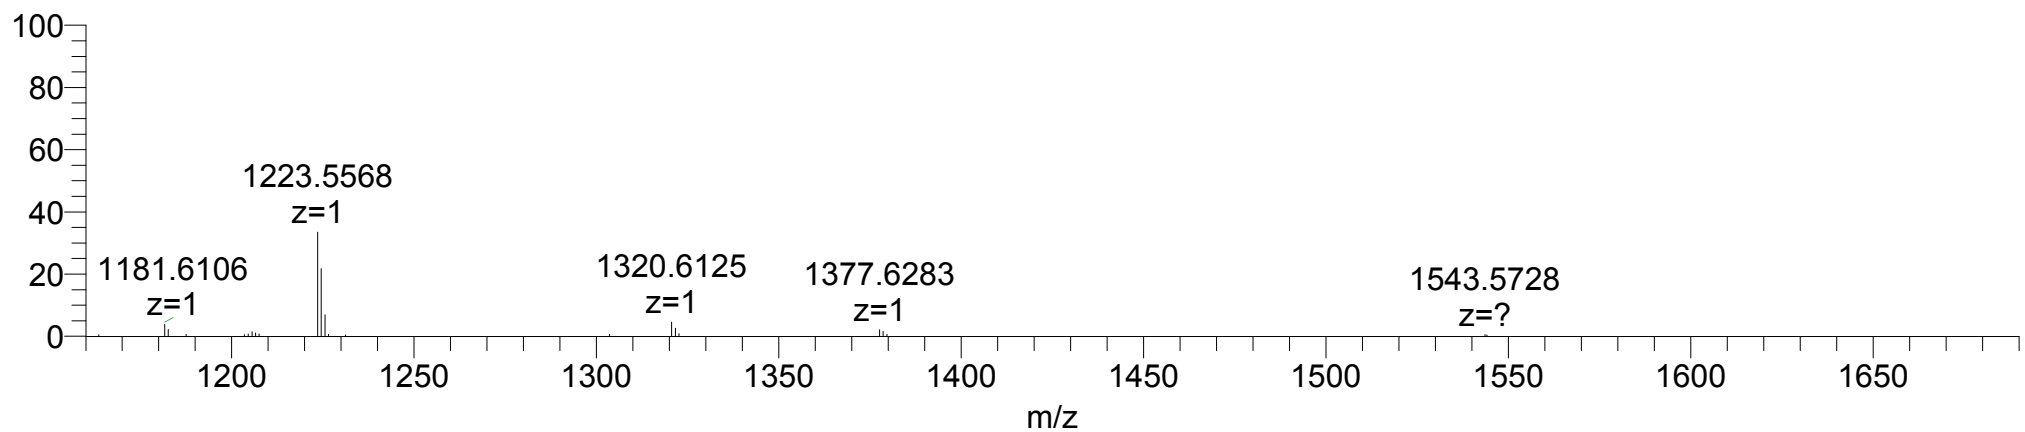



Human

37.

P1104-OH, P1107-OH, P1113-OH

#1092-1118: RGPAGAAGPIGIPGRPGPQGPPGPAGE

| Ion        | charge state | Theoretical m/z (mono) | Experimental m/z (mono) | Mass error (Da) | Mass error (PPM) |
|------------|--------------|------------------------|-------------------------|-----------------|------------------|
| [M+3H]+3OH | 3            | 812.7508               | 812.7436                | -0.0216         | -8.9             |
| b9         | 2            | 368.1985               | 368.1954                | -0.0062         | -8.4             |
| y4         | 1            | 373.1718               | 373.1685                | -0.0033         | -8.9             |
| a10        | 2            | 410.7430               | 410.7396                | -0.0068         | -8.3             |
| b10        | 2            | 424.7405               | 424.7370                | -0.0070         | -8.3             |
| b11        | 2            | 453.2512               | 453.2471                | -0.0082         | -9.1             |
| y6+OH      | 1            | 543.2409               | 543.2360                | -0.0049         | -9.0             |
| b8         | 1            | 638.3369               | 638.3309                | -0.0060         | -9.4             |
| b15+OH     | 2            | 672.8784               | 672.8726                | -0.0116         | -8.6             |
| y8+OH      | 1            | 697.3151               | 697.3076                | -0.0075         | -10.8            |
| y15+3OH    | 2            | 709.8366               | 709.8304                | -0.0124         | -8.7             |
| b17+2OH    | 2            | 757.9130               | 757.9088                | -0.0084         | -5.5             |
| b10        | 1            | 848.4737               | 848.4706                | -0.0031         | -3.7             |
| b19+2OH    | 2            | 870.4686               | 870.4597                | -0.0178         | -10.2            |
| b20+2OH    | 2            | 898.9794               | 898.9720                | -0.0148         | -8.2             |
| b11        | 1            | 905.4952               | 905.4874                | -0.0078         | -8.6             |
| b21+2OH    | 2            | 947.5057               | 947.5020                | -0.0074         | -3.9             |
| a12        | 1            | 990.5842               | 990.5775                | -0.0067         | -6.8             |
| b12        | 1            | 1018.5792              | 1018.5719               | -0.0073         | -7.2             |
| b23+3OH    | 2            | 1032.5403              | 1032.5320               | -0.0166         | -8.0             |
| y12+2OH    | 1            | 1092.4956              | 1092.4866               | -0.0090         | -8.2             |
| y15+3OH    | 1            | 1418.6659              | 1418.6580               | -0.0079         | -5.6             |

12\_9\_2011Col5a1\_AspNGluC\_1 #2791 RT: 24.84 AV: 1 NL: 3.94E4

T: FTMS + c NSI d Full ms2 812.74@hcd30.00 [100.00-2000.00]

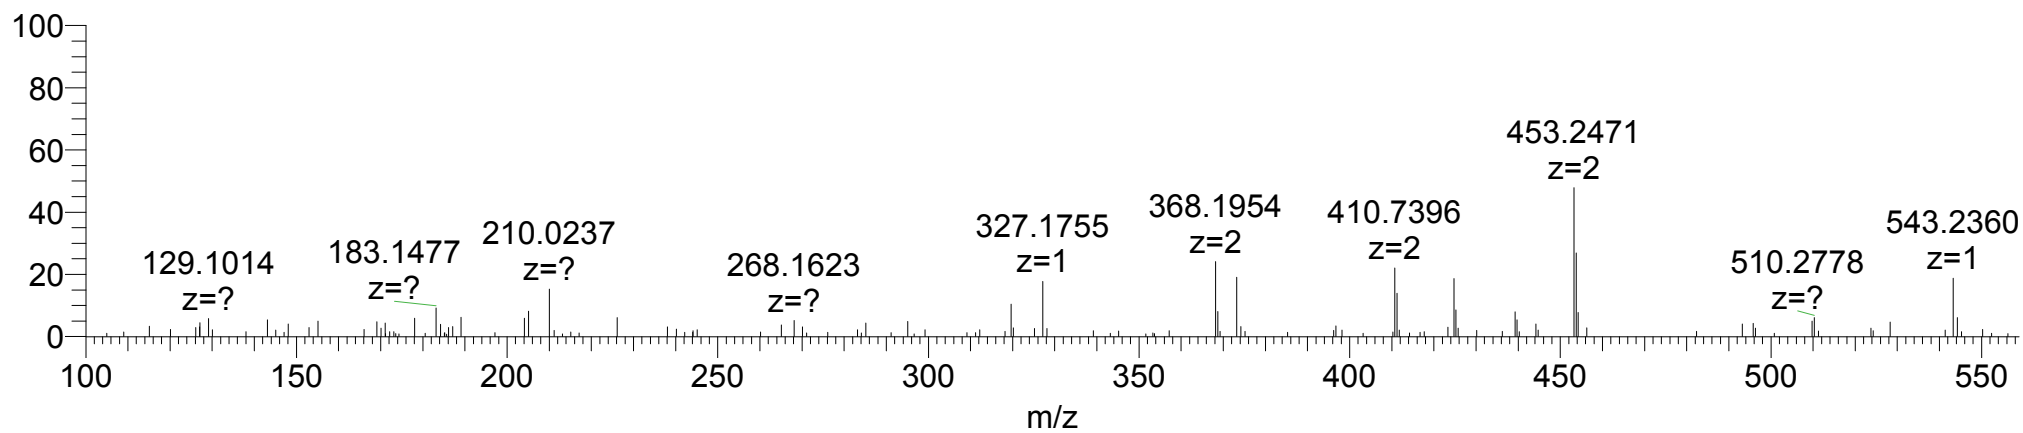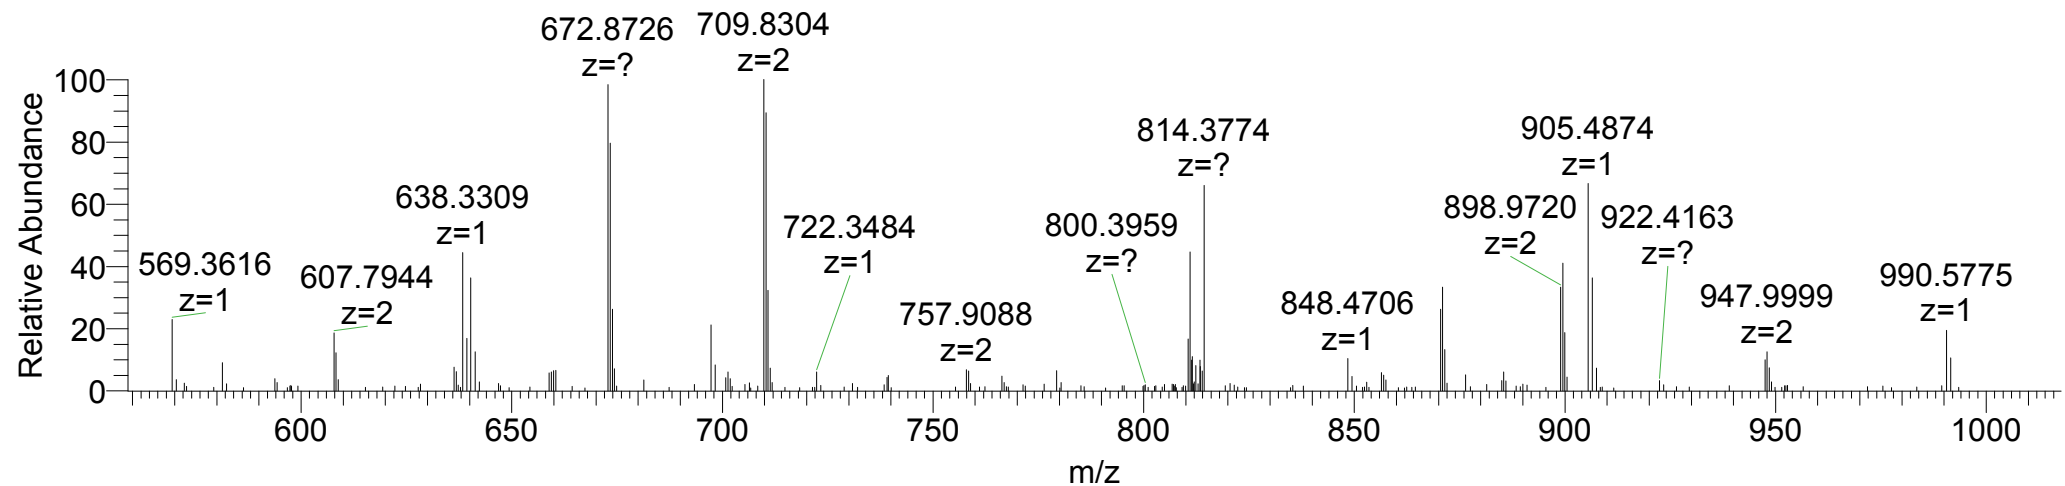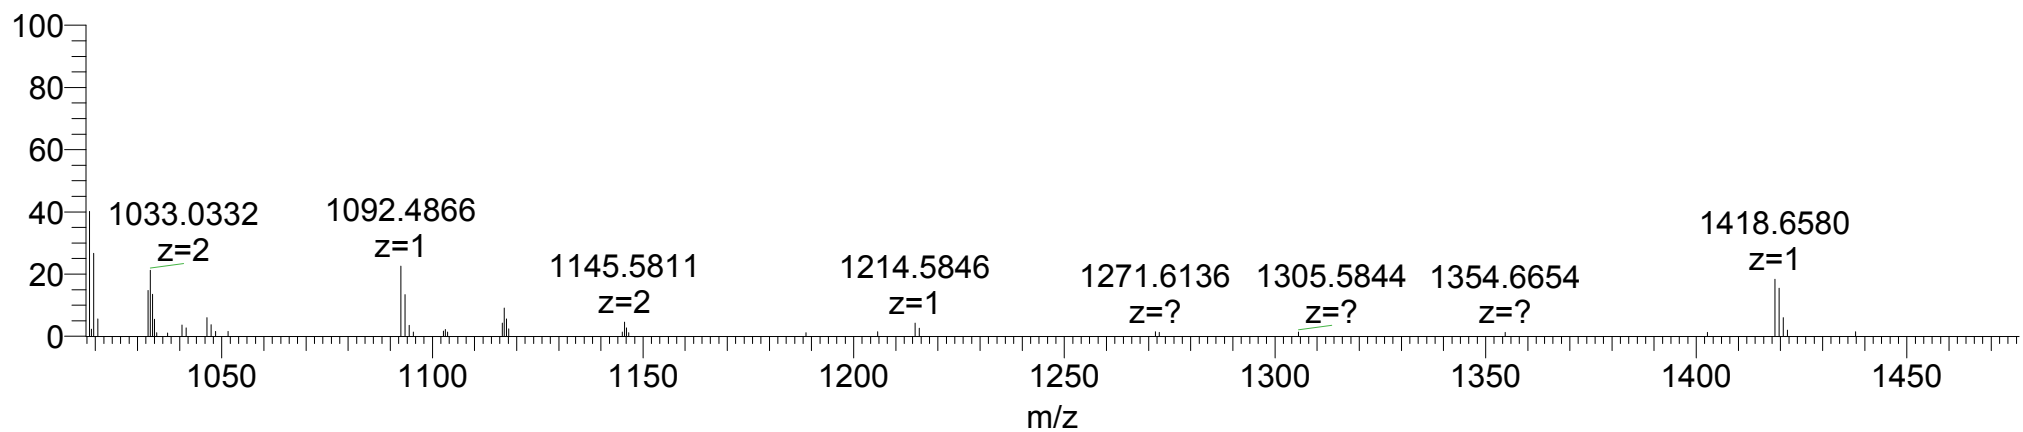

Human

38.

**K1119-OH.Gal.Glc**

#1093-1125: GPAGAAGPIGIPGRPGPQGPPGPAGEKGAPGEK

| Ion                | charge state | Theoretical m/z (mono) | Experimental m/z (mono) | Mass error (Da) | Mass error (PPM) |
|--------------------|--------------|------------------------|-------------------------|-----------------|------------------|
| [M+3H]+2OH+Gal.Glc | 3            | 1085.8758              | 1085.8657               | -0.0303         | -9.3             |
| b2/GP              | 1            | 155.0815               | 155.0800                | -0.0015         | -9.7             |
| GPA/APG            | 1            | 226.1186               | 226.1166                | -0.0020         | -8.9             |
| b4/GAPG            | 1            | 283.1401               | 283.1374                | -0.0027         | -9.6             |
| a5                 | 1            | 326.1823               | 326.1791                | -0.0032         | -9.8             |
| b6/AGAAGP          | 1            | 425.2143               | 425.2103                | -0.0040         | -9.4             |
| y4                 | 1            | 430.2296               | 430.2251                | -0.0045         | -10.5            |
| b7                 | 1            | 482.2358               | 482.2314                | -0.0044         | -9.1             |
| y6                 | 1            | 558.2882               | 558.2813                | -0.0069         | -12.4            |
| b9/PAGAAGPIG       | 1            | 692.3726               | 692.3660                | -0.0066         | -9.5             |
| b10                | 1            | 749.3941               | 749.3928                | -0.0013         | -1.7             |
| b11/AGAAGPIGIPG    | 1            | 862.4781               | 862.4694                | -0.0087         | -10.1            |
| [M+3H]+2OH         | 3            | 977.8406               | 977.8304                | -0.0306         | -10.4            |
| y22+2OH            | 2            | 1035.5218              | 1035.5109               | -0.0218         | -10.5            |
| [M+3H]+2OH+Gal.Glc | 3            | 1085.8758              | 1085.8650               | -0.0324         | -10.0            |
| y24+2OH            | 2            | 1120.5745              | 1120.5687               | -0.0116         | -5.2             |
| y26+2OH            | 2            | 1225.6430              | 1225.6295               | -0.0270         | -11.0            |
| y27+2OH            | 2            | 1254.1537              | 1254.1458               | -0.0158         | -6.3             |
| y28+2OH            | 2            | 1289.6723              | 1289.6715               | -0.0016         | -0.6             |

\*Unlocalized sites: P1104-OH?, P1107-OH?, P1109-OH?, P1112-OH?, P1113-OH?, P1115-OH?

Pseudolocalized sites: P1104-OH or P1107-OH or P1113-OH

12\_9\_2011Col5a1\_Trypsin\_target #2605 RT: 23.70 AV: 1 NL: 1.80E4

T: FTMS + c NSI d Full ms2 1086.20@hcd30.00 [100.00-2000.00]

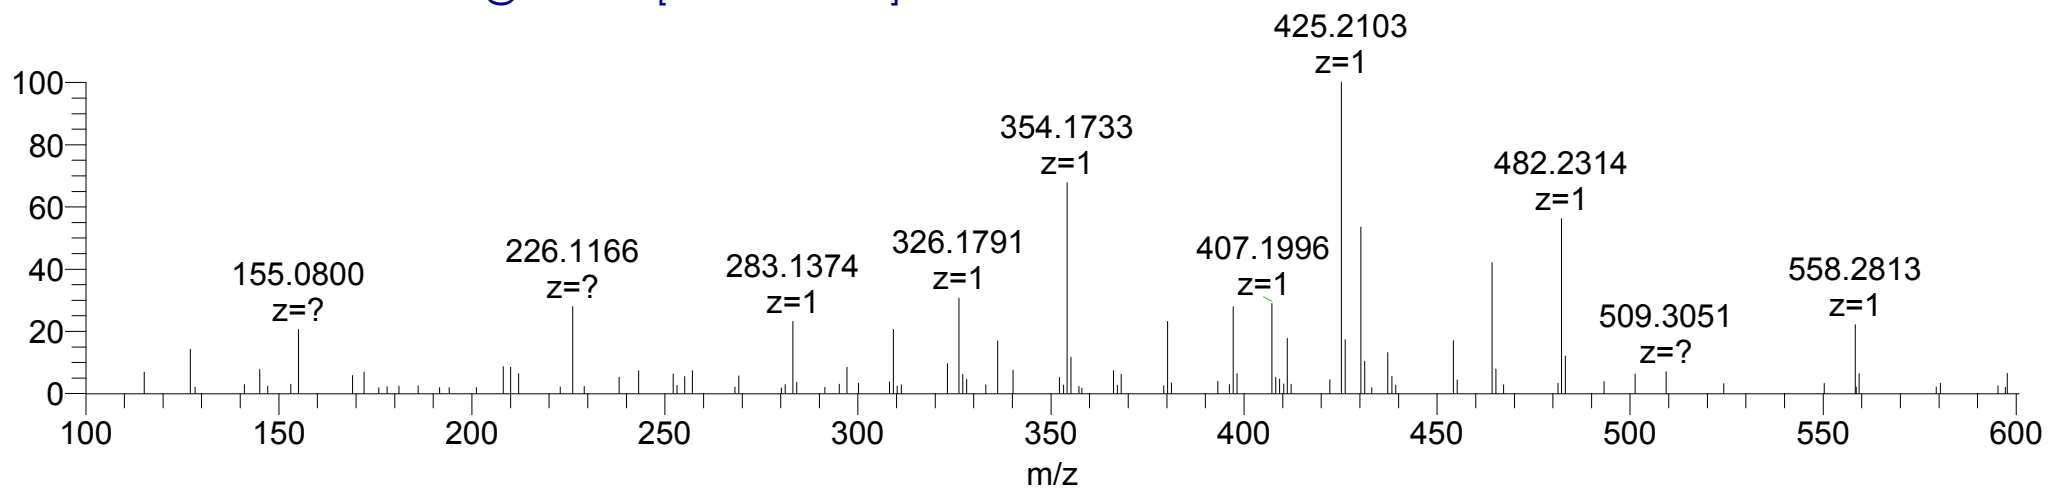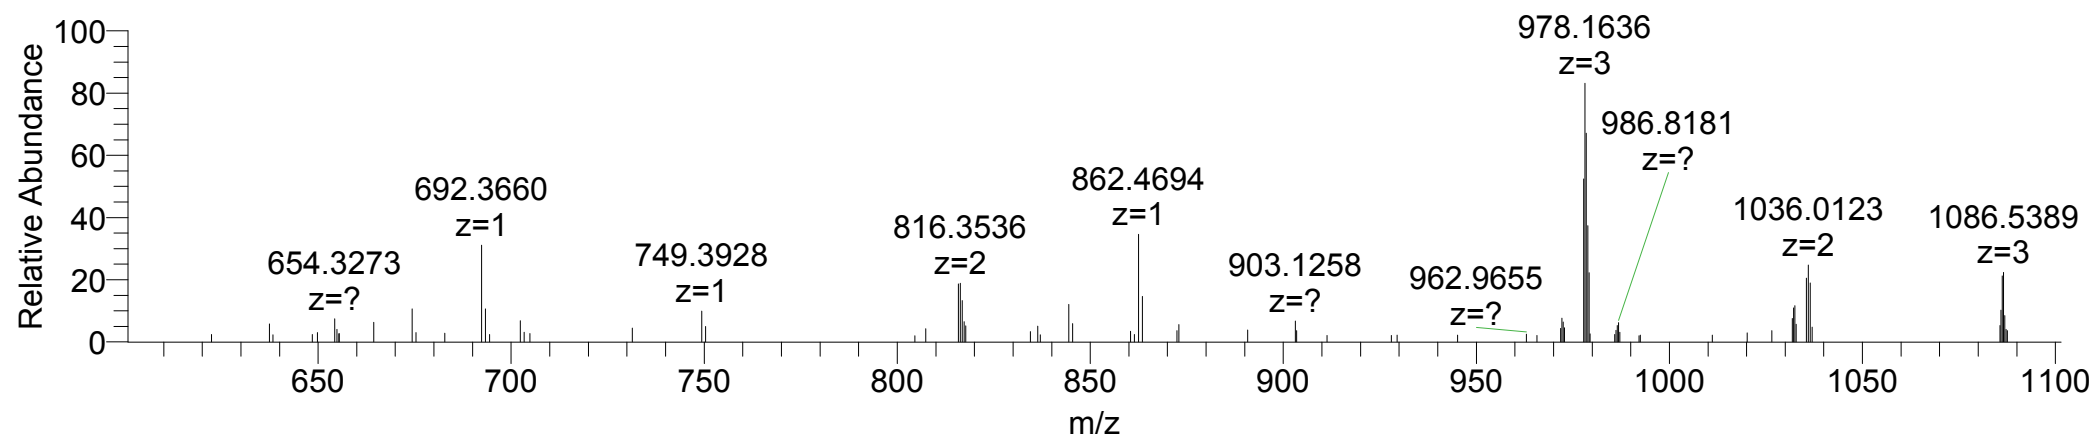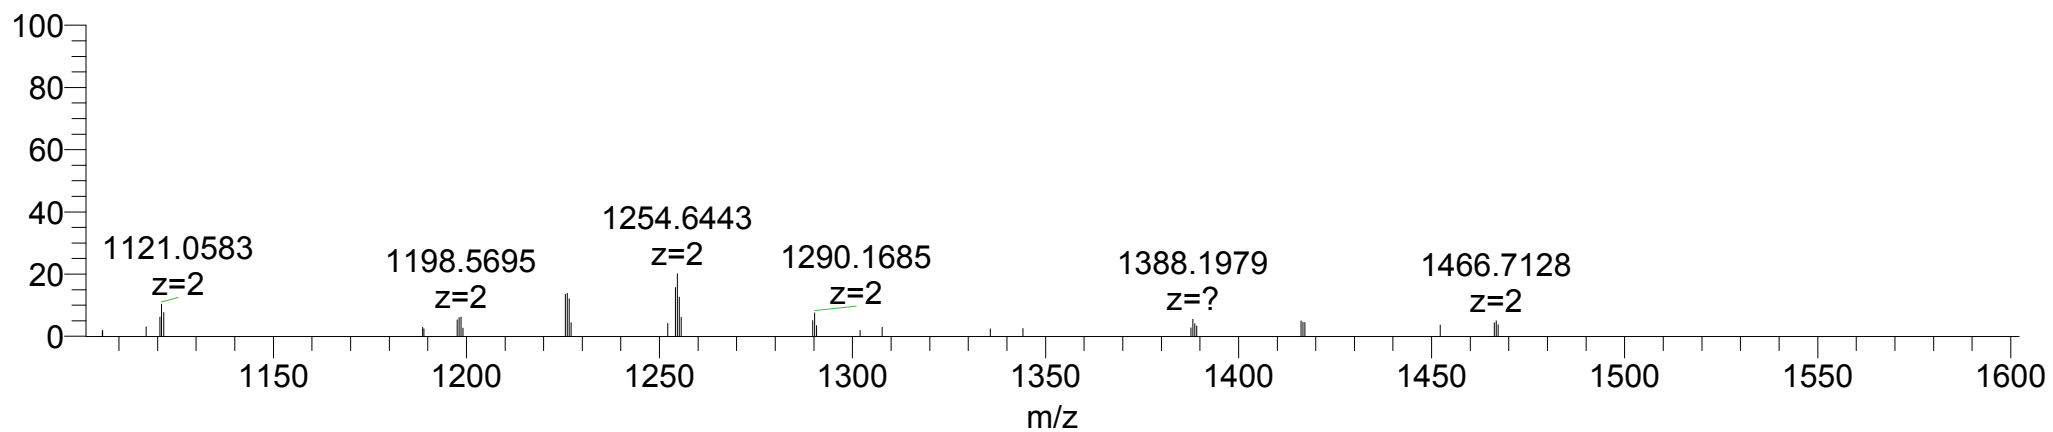

Human

39.

P1143-OH, P1152-OH, K1158-OH

#1134-1160: DGLQGPVGLPGPAGPVGPPGGEDGDKGE

| Ion                                    | charge state | Theoretical m/z (mono) | Experimental m/z (mono) | Mass error (Da) | Mass error (PPM) |
|----------------------------------------|--------------|------------------------|-------------------------|-----------------|------------------|
| [M+3H]+3OH                             | 3            | 839.7295               | 839.7222                | -0.0219         | -8.7             |
| GP-28                                  | 1            | 127.0866               | 127.0856                | -0.0010         | -7.9             |
| PV-28                                  | 1            | 169.1335               | 169.1322                | -0.0013         | -7.7             |
| y2                                     | 1            | 205.0819               | 205.0800                | -0.0019         | -9.3             |
| PVG/VGP/GPV                            | 1            | 254.1499               | 254.1476                | -0.0023         | -9.1             |
| b3                                     | 1            | 286.1397               | 286.1373                | -0.0024         | -8.4             |
| GLQG-NH3/PGPA+OH                       | 1            | 339.1663               | 339.1635                | -0.0028         | -8.3             |
| y3+OH                                  | 1            | 349.1718               | 349.1685                | -0.0033         | -9.5             |
| PGPAG+OH/b4-H2O                        | 1            | 396.1878               | 396.1843                | -0.0035         | -8.9             |
| b4                                     | 1            | 414.1983               | 414.1935                | -0.0048         | -11.6            |
| y10-H2O+2OH                            | 2            | 507.7042               | 507.7004                | -0.0076         | -7.5             |
| y10+2OH                                | 2            | 516.7056               | 516.7095                | 0.0078          | 7.6              |
| y11+2OH                                | 2            | 545.2153               | 545.2202                | 0.0098          | 9.0              |
| PGPAGPV+OH/<br>AGPVGPP+OH              | 1            | 592.3089               | 592.3041                | -0.0048         | -8.1             |
| y13+2OH                                | 2            | 643.2808               | 643.2759                | -0.0098         | -7.6             |
| AGPVGPPG+OH/<br>PGPAGPVG+OH/<br>b7-H2O | 1            | 649.3304               | 649.3252                | -0.0052         | -8.0             |
| b7                                     | 1            | 667.3410               | 667.3348                | -0.0062         | -9.3             |
| y14+2OH                                | 2            | 671.7915               | 671.7862                | -0.0106         | -7.9             |
| y16+2OH                                | 2            | 755.8364               | 755.8312                | -0.0104         | -6.9             |
| b9                                     | 1            | 837.4465               | 837.4465                | 0.0000          | 0.0              |
| y18+3OH                                | 1            | 840.8710               | 840.8626                | -0.0084         | -10.0            |
| y9+2OH                                 | 1            | 935.3589               | 935.3503                | -0.0086         | -9.2             |
| y10+2OH                                | 1            | 1032.4116              | 1032.4025               | -0.0091         | -8.8             |
| y11+2OH                                | 1            | 1089.4331              | 1089.4233               | -0.0098         | -9.0             |
| b14+OH                                 | 1            | 1232.6270              | 1232.6210               | -0.0060         | -4.9             |
| y13+2OH                                | 1            | 1285.5543              | 1285.5494               | -0.0049         | -3.8             |

12\_9\_2011Col5a1\_AspNGluC\_1 #4148 RT: 36.20 AV: 1 NL: 2.52E4

T: FTMS + c NSI d Full ms2 840.06@hcd30.00 [100.00-2000.00]

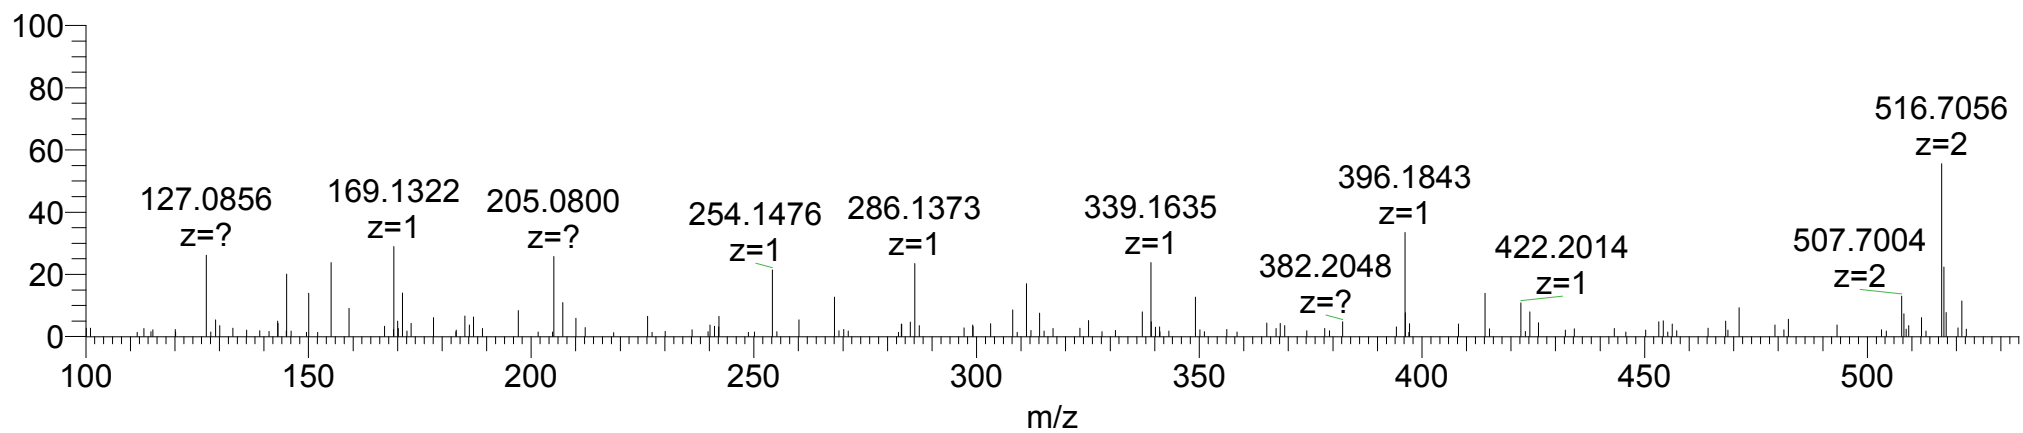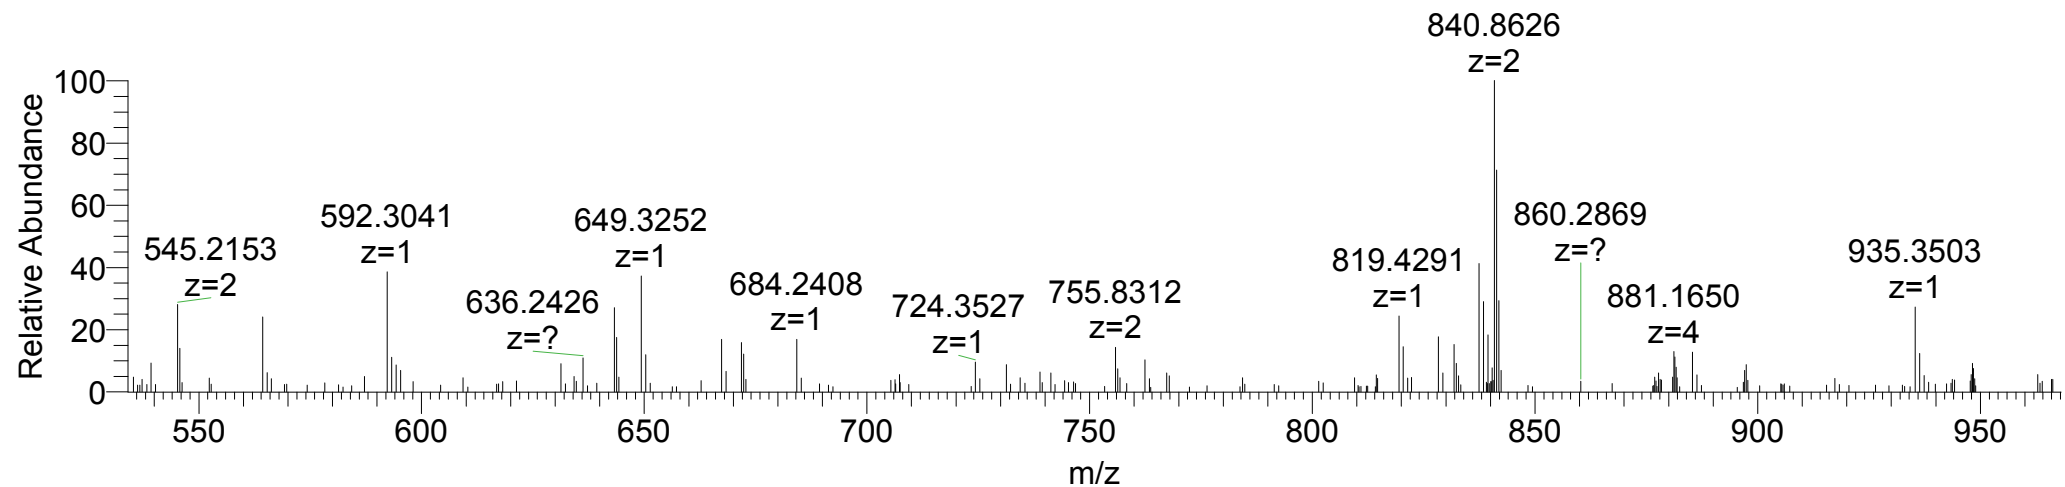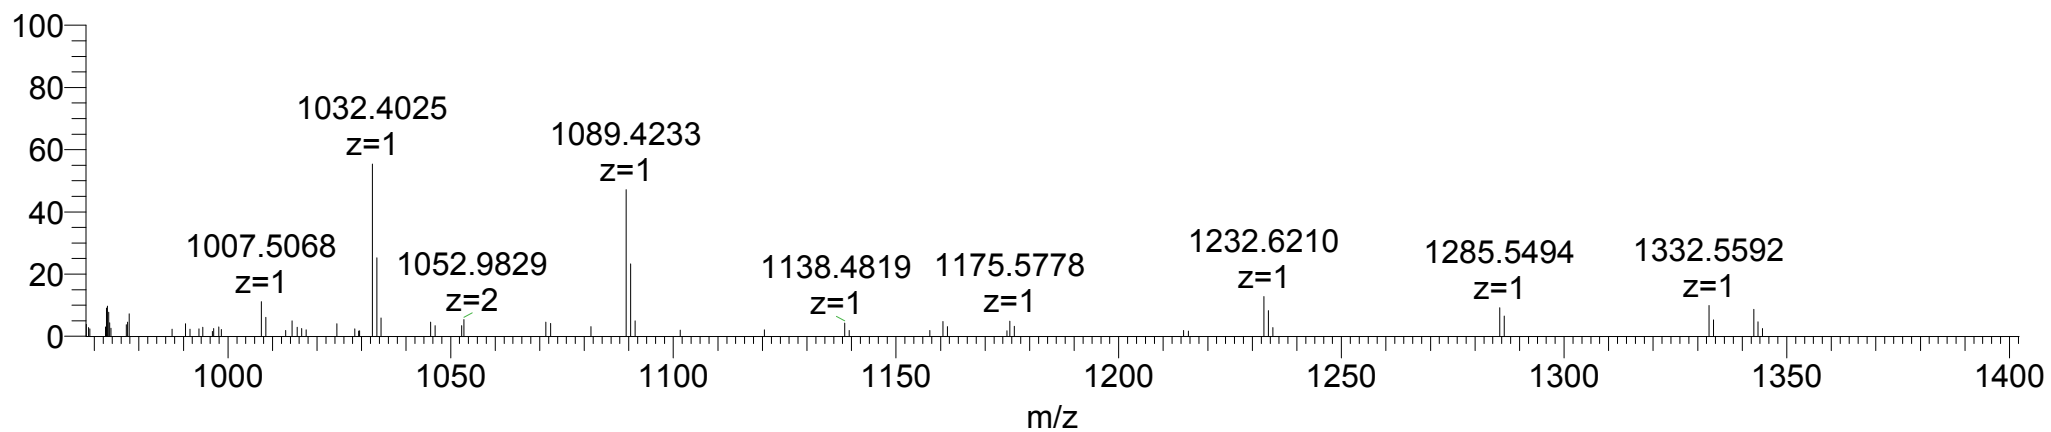

Human

40.

P1143-OH, P1164-OH, K1167-OH

#1134-1167: DGLQGPVGLPGPAGPVGPPGEDGDKGEIGEPGQK

| Ion        | charge state | Theoretical m/z (mono) | Experimental m/z (mono) | Mass error (Da) | Mass error (PPM) |
|------------|--------------|------------------------|-------------------------|-----------------|------------------|
| [M+3H]+4OH | 3            | 1081.5198              | 1081.5090               | -0.0324         | -10.0            |
| y12+2OH    | 2            | 623.7991               | 623.7935                | -0.0112         | -9.0             |
| b7         | 1            | 667.3410               | 667.3377                | -0.0033         | -5.0             |
| b9-H2O     | 1            | 819.4359               | 819.4290                | -0.0069         | -8.4             |
| b9         | 1            | 837.4465               | 837.4395                | -0.0070         | -8.4             |
| y17+2OH    | 2            | 879.3949               | 879.3876                | -0.0146         | -8.3             |
| y18+2OH    | 2            | 907.9056               | 907.8998                | -0.0116         | -6.4             |
| y30+4OH    | 3            | 943.7894               | 943.7801                | -0.0279         | -9.9             |
| y31+4OH    | 3            | 986.4756               | 986.4702                | -0.0162         | -5.5             |
| y20+3OH    | 2            | 1005.9662              | 1005.9584               | -0.0156         | -7.8             |
| y21+3OH    | 2            | 1034.4769              | 1034.4695               | -0.0148         | -7.2             |
| y23+3OH    | 2            | 1118.5218              | 1118.5144               | -0.0148         | -6.6             |
| y25+4OH    | 2            | 1203.5564              | 1203.5486               | -0.0156         | -6.5             |
| y26+4OH    | 2            | 1260.0984              | 1260.0901               | -0.0166         | -6.6             |
| y27+4OH    | 2            | 1288.6092              | 1288.6005               | -0.0174         | -6.8             |
| b28+2OH    | 2            | 1298.6299              | 1298.6261               | -0.0076         | -2.9             |
| y29+4OH    | 2            | 1386.6698              | 1386.6604               | -0.0188         | -6.8             |
| b30+2OH    | 2            | 1391.6619              | 1391.6538               | -0.0162         | -5.8             |
| y30+4OH    | 2            | 1415.1805              | 1415.1715               | -0.0180         | -6.4             |
| b16+OH     | 1            | 1428.7482              | 1428.7400               | -0.0082         | -5.7             |
| b17+OH     | 1            | 1485.7696              | 1485.7539               | -0.0157         | -10.6            |

\*Unlocalized sites: P1151-OH?, P1152-OH?

Pseudolocalized sites: P1152-OH

12\_9\_2011Col5a1\_Trypsin\_target\_MS3 #2877 RT: 35.35 AV: 1 NL: 1.04E5

T: FTMS + c NSI d Full ms2 1081.84@cid35.00 [285.00-2000.00]

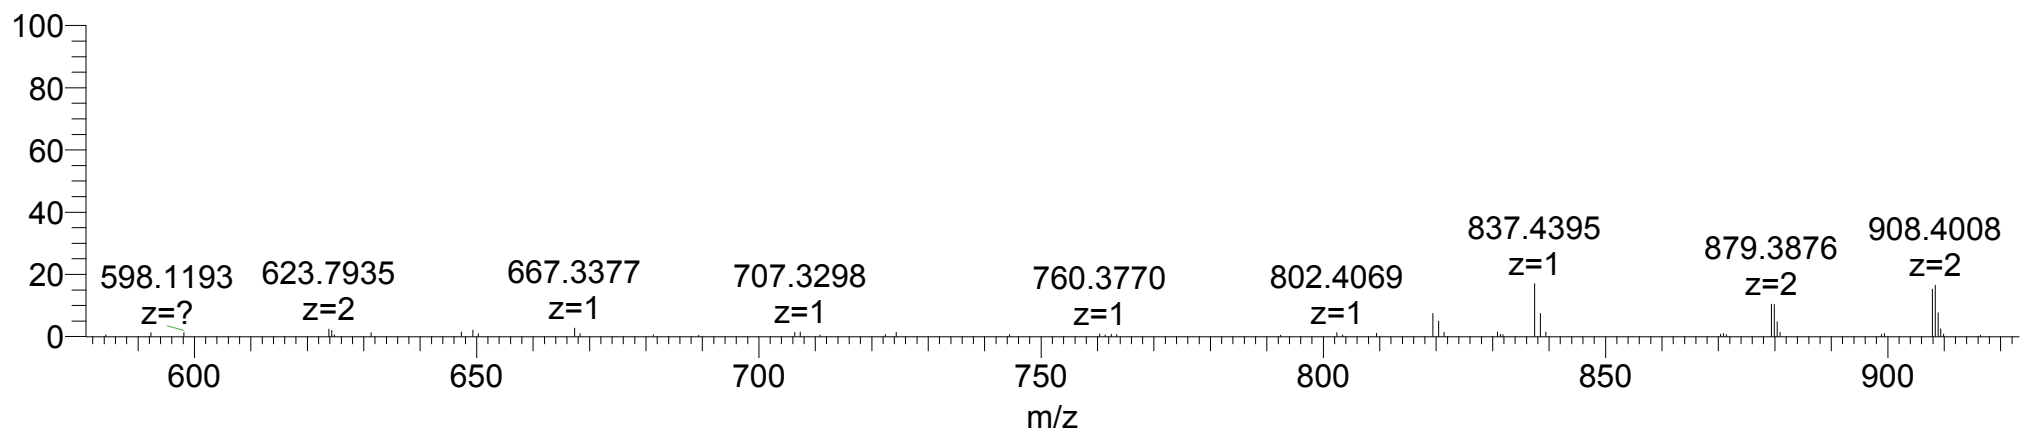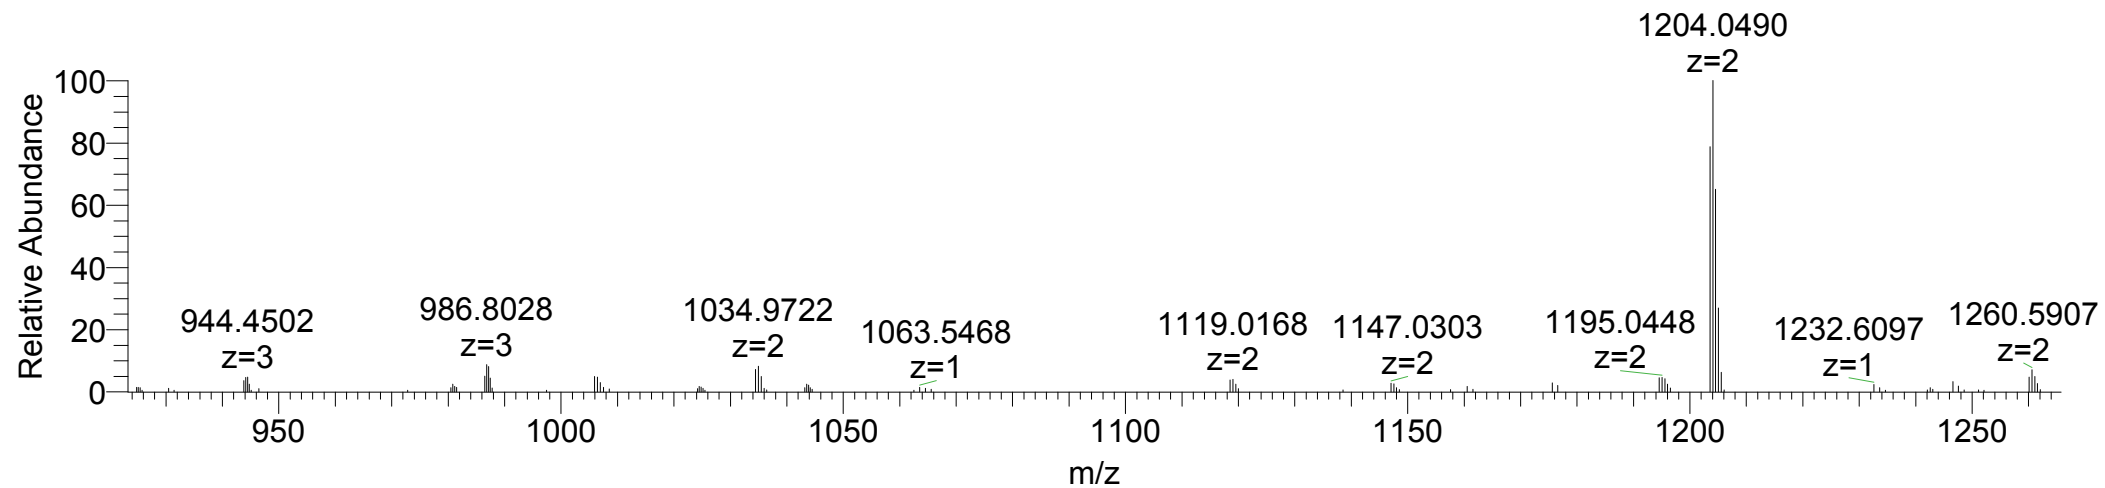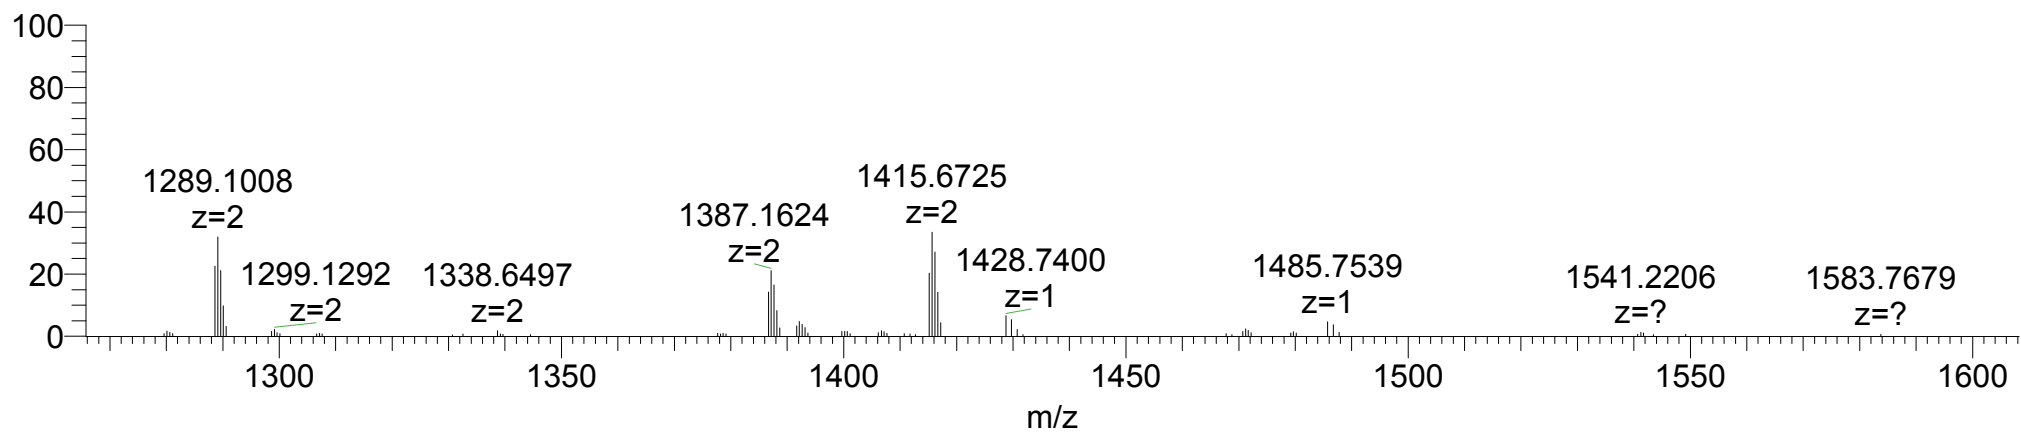



Human

41.

**K1173-OH.Gal.Glc, P1179-OH, P1191-OH**

#1171-1203: GDKGEQGPPGPTGPQGPIGQPGPSGADGEPGPR

| Ion                | charge state | Theoretical m/z (mono) | Experimental m/z (mono) | Mass error (Da) | Mass error (PPM) |
|--------------------|--------------|------------------------|-------------------------|-----------------|------------------|
| [M+3H]+4OH+Gal.Glc | 3            | 1146.1801              | 1146.1702               | -0.0297         | -8.6             |
| y4+OH              | 1            | 442.2409               | 442.2366                | -0.0043         | -9.7             |
| b5+OH              | 1            | 503.2096               | 503.2056                | -0.0040         | -8.0             |
| y11+OH             | 1            | 528.2413               | 528.2371                | -0.0042         | -8.0             |
| y13+2OH            | 2            | 613.2758               | 613.2702                | -0.0112         | -9.1             |
| y6+OH              | 1            | 628.3049               | 628.2990                | -0.0059         | -9.4             |
| b7+OH              | 1            | 688.2897               | 688.2852                | -0.0045         | -6.5             |
| y7+OH              | 1            | 743.3319               | 743.3221                | -0.0098         | -13.2            |
| b8+OH              | 1            | 785.3424               | 785.3345                | -0.0079         | -10.1            |
| y17+2OH            | 2            | 810.8843               | 810.8771                | -0.0144         | -8.9             |
| y18+2OH            | 2            | 839.3950               | 839.3882                | -0.0136         | -8.1             |
| b18+2OH            | 2            | 851.9052               | 851.8987                | -0.0130         | -7.6             |
| y9+OH              | 1            | 871.3904               | 871.3854                | -0.0050         | -5.7             |
| b20+2OH            | 2            | 944.4452               | 944.4362                | -0.0180         | -9.5             |
| y20+2OH            | 2            | 951.9507               | 951.9408                | -0.0198         | -10.4            |
| y21+2OH            | 2            | 980.4614               | 980.4531                | -0.0166         | -8.5             |
| [M+3H]+4OH         | 3            | 1038.1449              | 1038.1359               | -0.0270         | -8.7             |
| y11+OH             | 1            | 1055.4752              | 1055.4668               | -0.0084         | -8.0             |
| y23+2OH            | 2            | 1079.5116              | 1079.5020               | -0.0192         | -8.9             |
| [M+3H]+4OH+Gal     | 1            | 1092.1625              | 1092.1552               | -0.0073         | -6.7             |
| y25+3OH            | 2            | 1164.5462              | 1164.5383               | -0.0158         | -6.8             |
| b25-2H2O+Gal+3OH   | 2            | 1213.0488              | 1213.0587               | 0.0198          | 8.2              |
| y13+2OH            | 1            | 1225.5444              | 1225.5353               | -0.0091         | -7.4             |
| y27+3OH            | 2            | 1241.5833              | 1241.5734               | -0.0198         | -8.0             |
| y15+2OH            | 1            | 1410.6244              | 1410.6158               | -0.0086         | -6.1             |

\*Unlocalized sites: P1200-OH?, P1202-OH?

Pseudolocalized sites: P1200-OH

12\_9\_2011Col5a1\_Trypsin\_CE30 #2007 RT: 19.49 AV: 1 NL: 3.06E4

T: FTMS + c NSI d Full ms2 1146.17@hcd30.00 [100.00-2000.00]

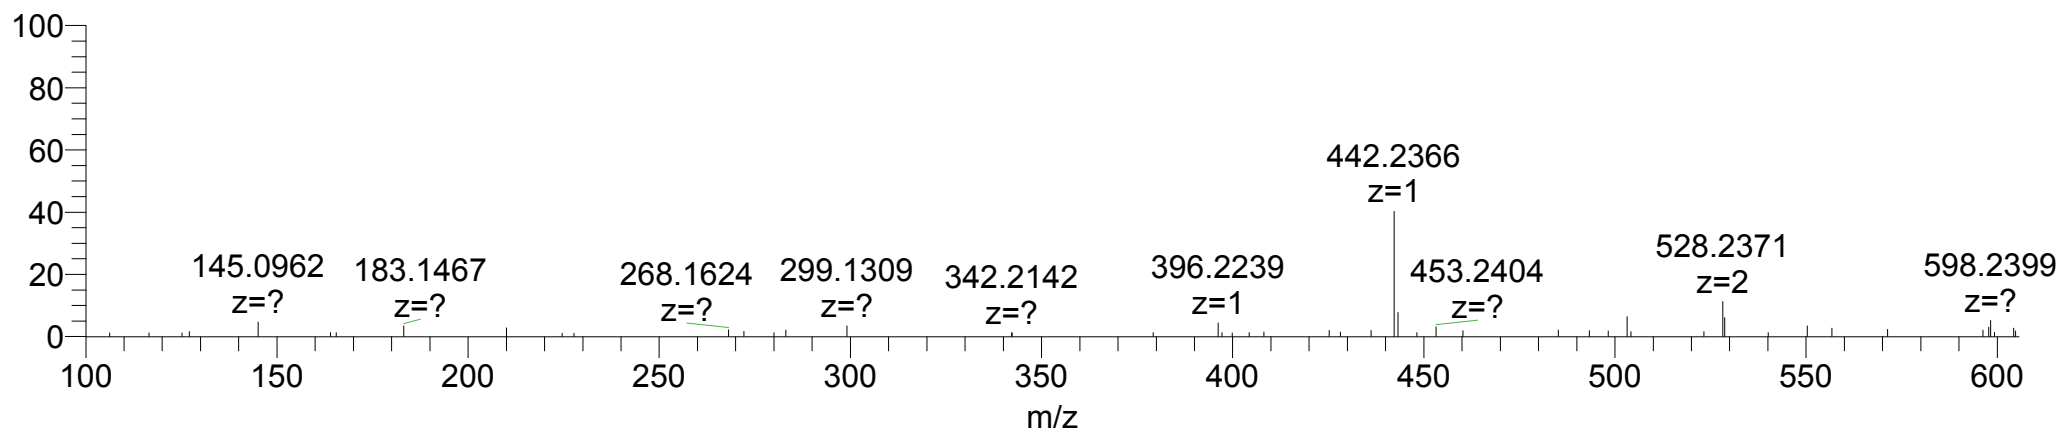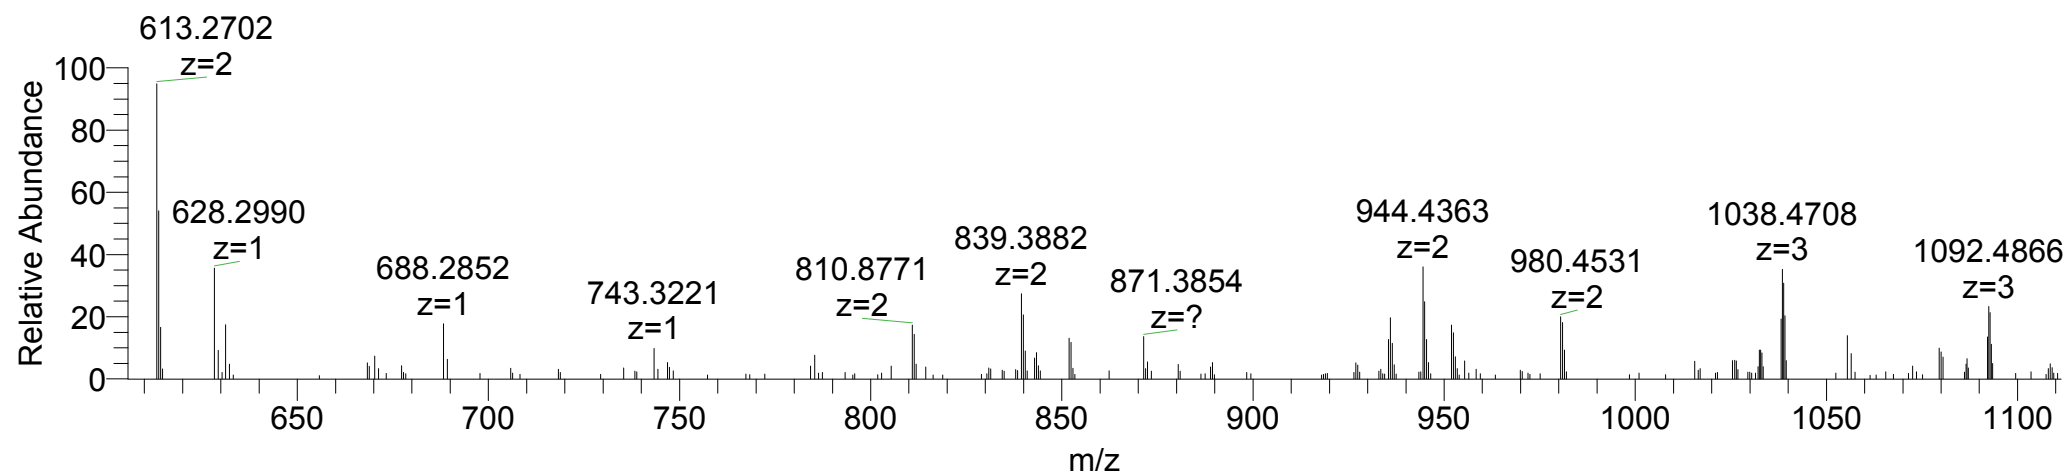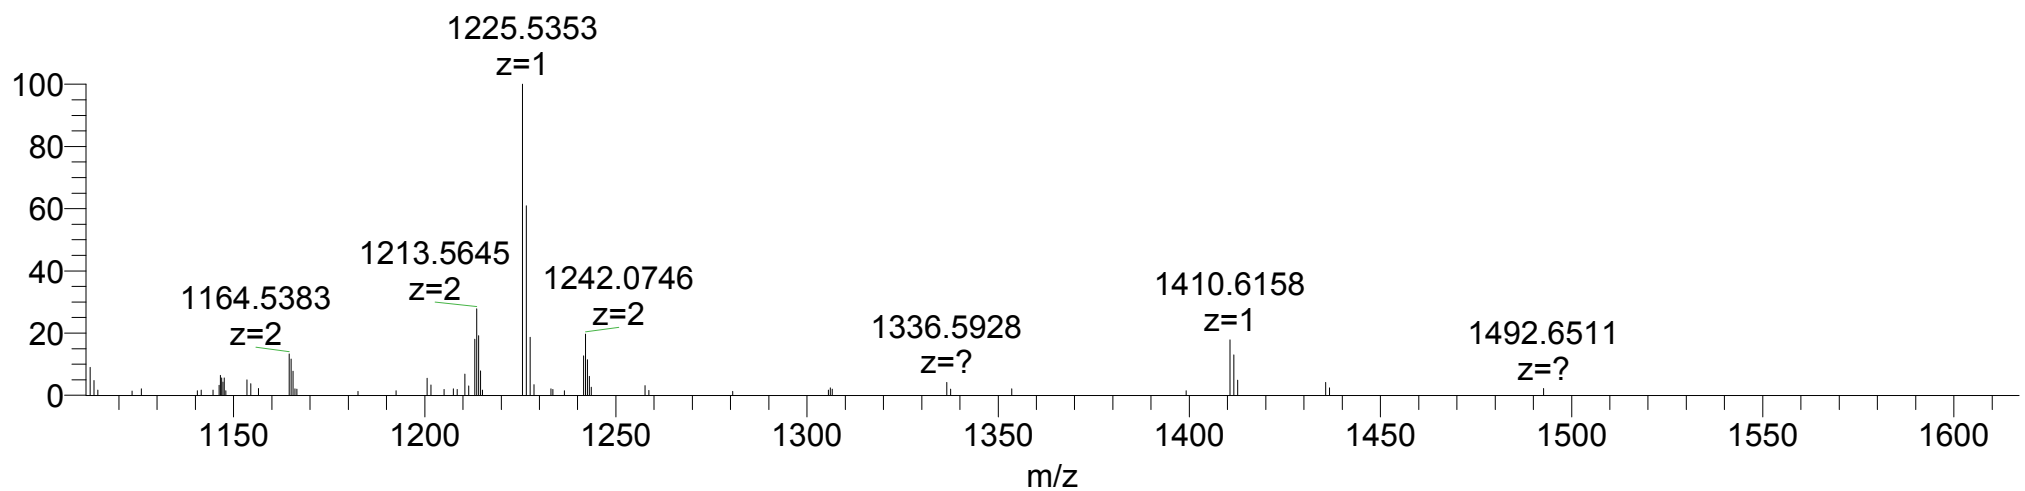

Human

**42.**

**K1212-OH.Gal.Glc**

#1204-1218: GQQGLFGQKGDEGPR

| Ion               | charge state | Theoretical m/z (mono) | Experimental m/z (mono) | Mass error (Da) | Mass error (PPM) |
|-------------------|--------------|------------------------|-------------------------|-----------------|------------------|
| [M+2H]+OH+Gal.Glc | 2            | 957.4398               | 957.4384                | -0.0028         | -1.5             |
| F                 | 1            | 120.0808               | 120.0805                | -0.0003         | -2.5             |
| QG/b2             | 1            | 186.0873               | 186.0872                | -0.0001         | -0.5             |
| y3                | 1            | 329.1932               | 329.1923                | -0.0009         | -2.7             |
| b4-NH3            | 1            | 354.1408               | 354.1413                | 0.0005          | 1.4              |
| y4                | 1            | 458.2358               | 458.2349                | -0.0009         | -2.0             |
| y5                | 1            | 573.2627               | 573.2604                | -0.0023         | -4.0             |
| y6                | 1            | 630.2842               | 630.2819                | -0.0023         | -3.7             |
| y7+OH             | 1            | 774.3741               | 774.3729                | -0.0012         | -1.6             |
| [M+2H]+OH         | 2            | 795.3870               | 795.3868                | -0.0004         | -0.3             |
| y9+OH             | 1            | 959.4541               | 959.4529                | -0.0012         | -1.3             |
| y10+OH            | 1            | 1106.5225              | 1106.5198               | -0.0027         | -2.4             |
| y12+OH            | 1            | 1276.6280              | 1276.6246               | -0.0034         | -2.7             |

10\_7\_2011Collagen\_Trypsin\_HCDandETD #2357 RT: 18.30 AV: 1 NL: 9.15E5

T: FTMS + c NSI d Full ms2 957.94@hcd35.00 [100.00-1930.00]

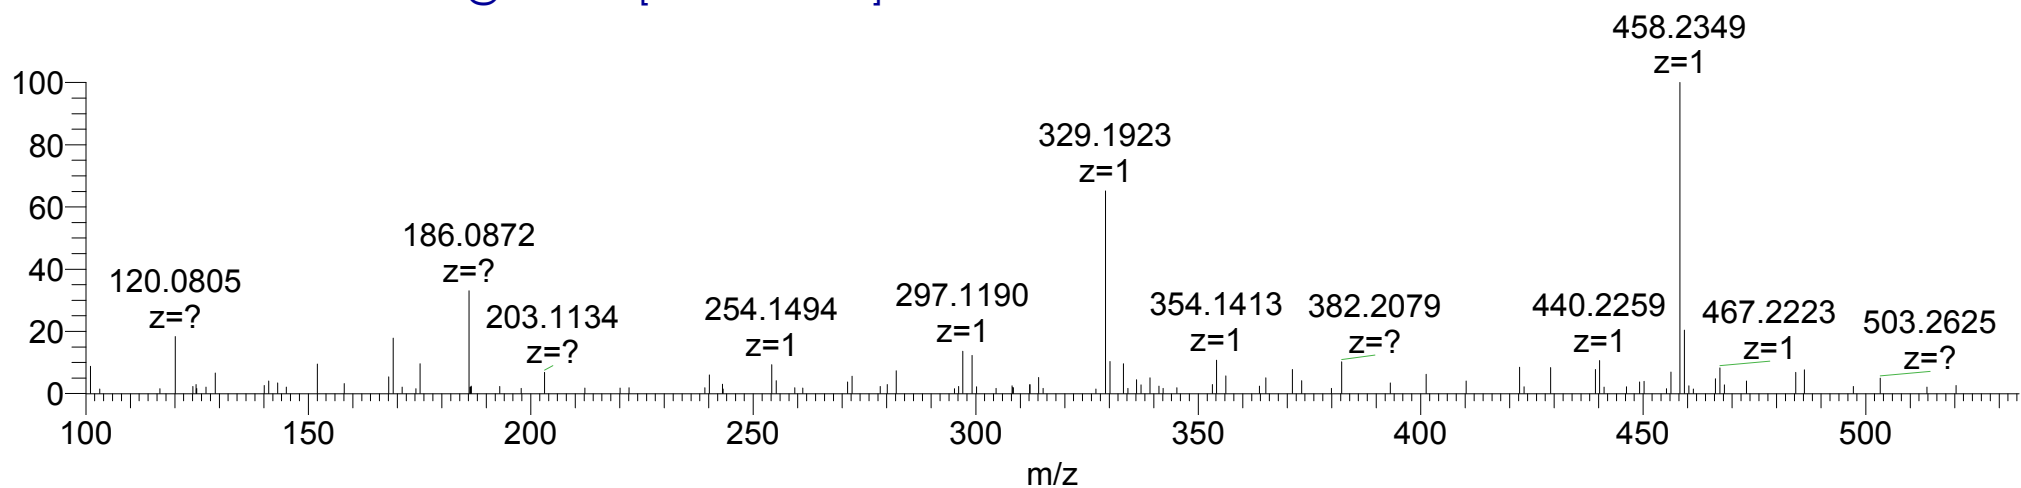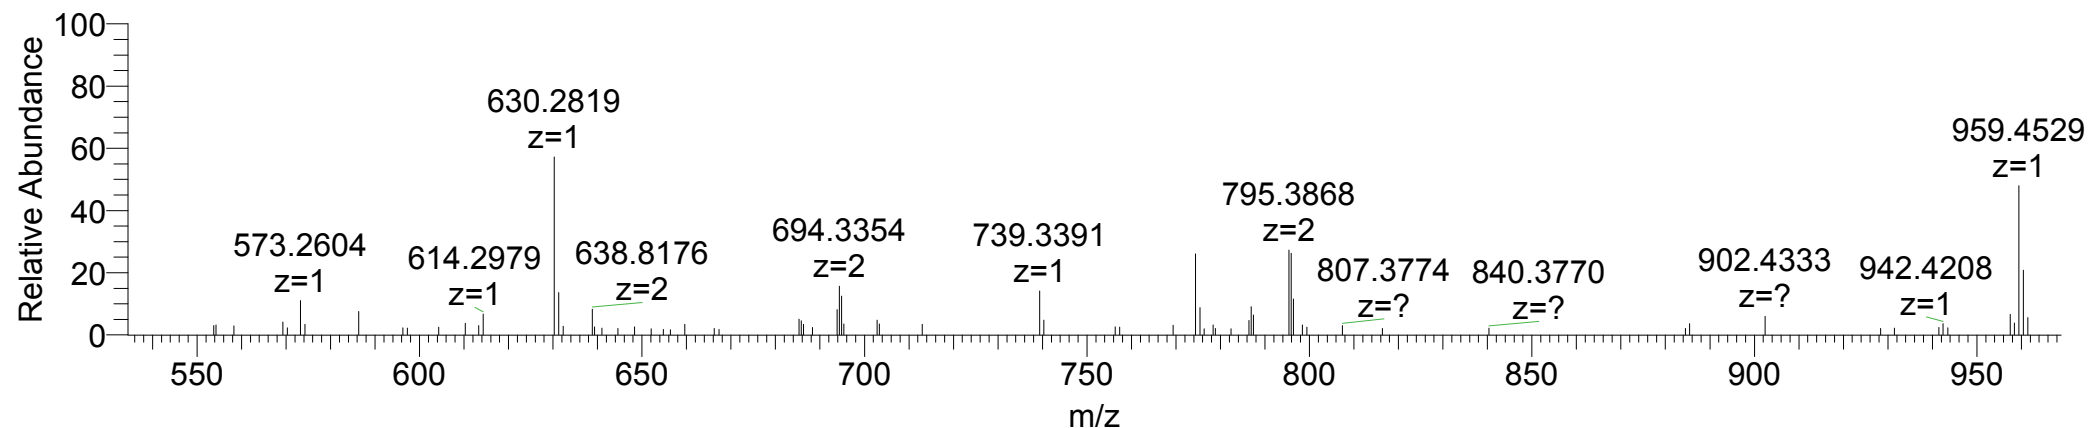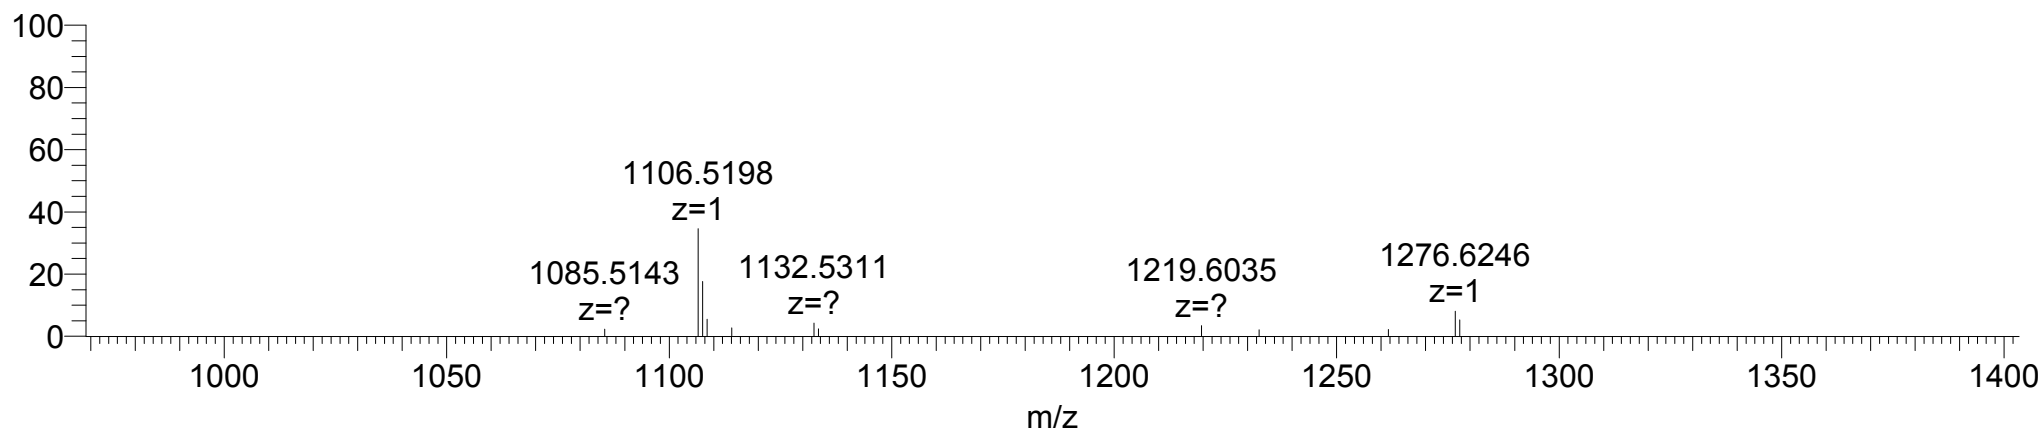

Human

**43.**

**P1221-OH, P1224-OH, P1233-OH, P1236-OH, K1239-OH**

#1219-1239: GFPGPPGPVGLQGLPGPPGEK

| Ion        | charge state | Theoretical m/z (mono) | Experimental m/z (mono) | Mass error (Da) | Mass error (PPM) |
|------------|--------------|------------------------|-------------------------|-----------------|------------------|
| [M+2H]+5OH | 2            | 1018.0102              | 1018.0025               | -0.0154         | -7.6             |
| y4+2OH     | 1            | 462.2195               | 462.2156                | -0.0039         | -8.5             |
| y5+2OH     | 1            | 559.2722               | 559.2678                | -0.0044         | -7.9             |
| y7+3OH     | 1            | 729.3414               | 729.3356                | -0.0058         | -8.0             |
| y17+4OH    | 2            | 830.9307               | 830.9237                | -0.0140         | -8.4             |
| y18+4OH    | 2            | 859.4414               | 859.4358                | -0.0112         | -6.5             |
| y9+3OH     | 1            | 899.4469               | 899.4385                | -0.0084         | -9.3             |
| y19+5OH    | 2            | 915.9652               | 915.9570                | -0.0164         | -9.0             |
| y12+3OH    | 1            | 1197.6110              | 1197.6014               | -0.0096         | -8.0             |
| y14+3OH    | 1            | 1393.7322              | 1393.7430               | 0.0108          | 7.8              |
| y16+4OH    | 1            | 1563.8013              | 1563.7969               | -0.0044         | -2.8             |

12\_9\_2011Col5a1\_Trypsin\_CE30 #4225 RT: 38.27 AV: 1 NL: 2.97E4

T: FTMS + c NSI d Full ms2 1018.00@hcd30.00 [100.00-2000.00]

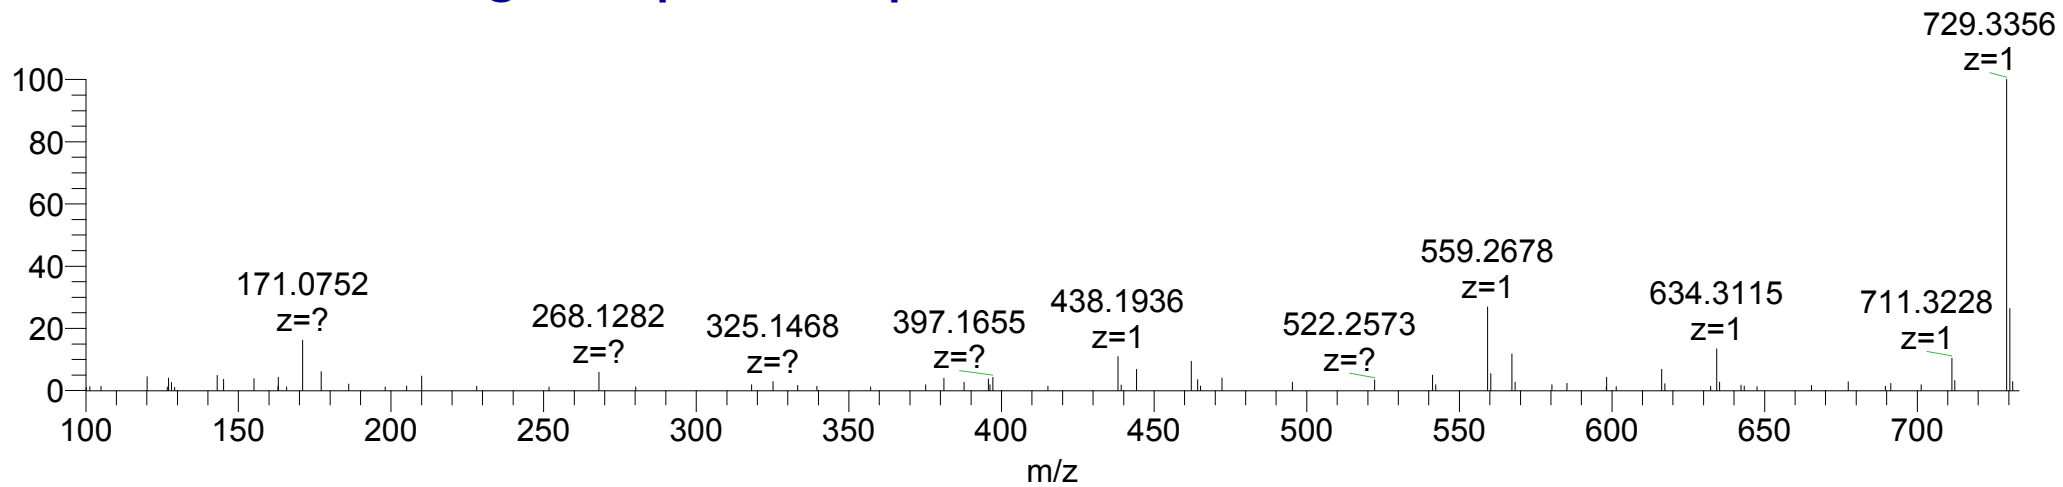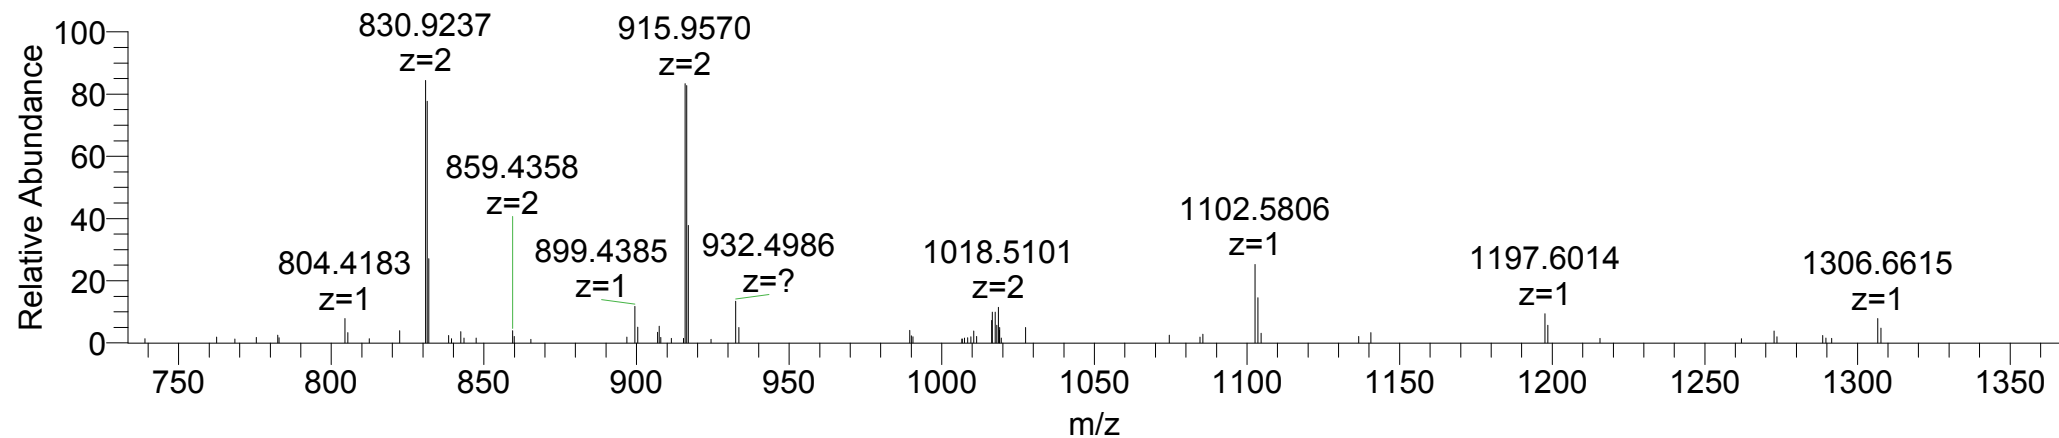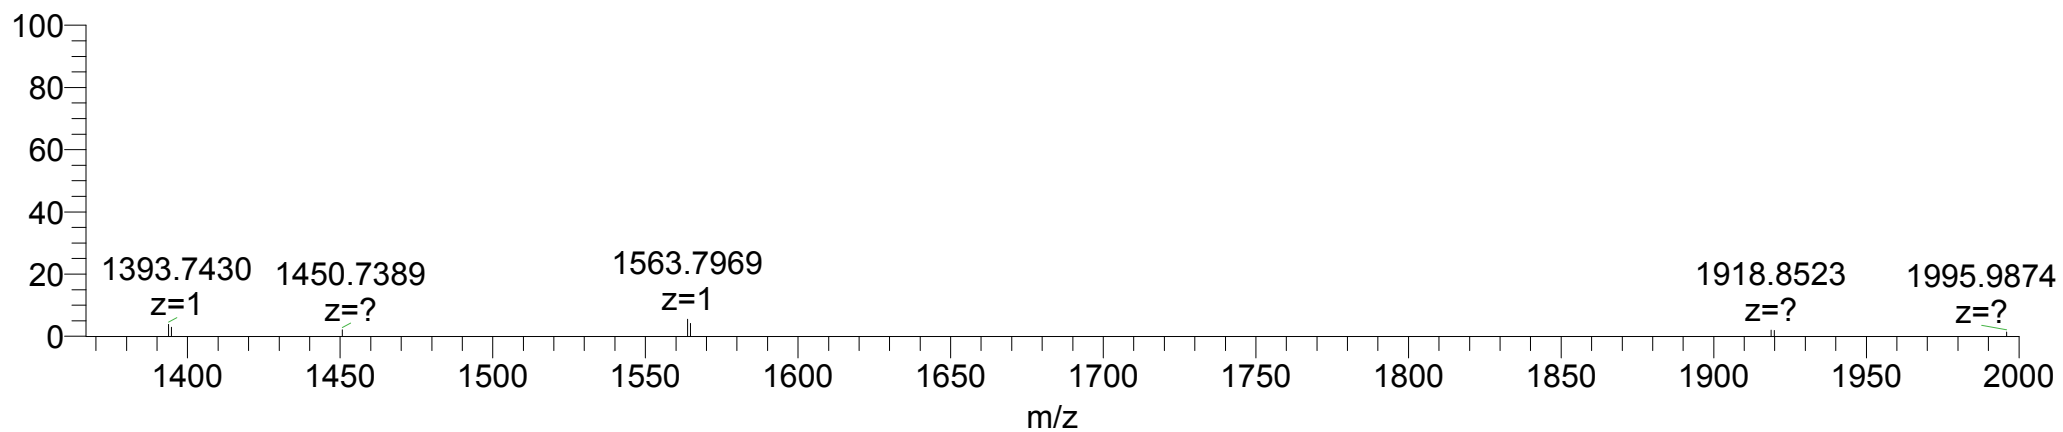

Human

**44.**

**P1251-OH, P1254-OH, P1263-OH**

#1244-1265: DVGQMGPPGPPPGPRGPPSGAPGA

| Ion        | charge state | Theoretical m/z (mono) | Experimental m/z (mono) | Mass error (Da) | Mass error (PPM) |
|------------|--------------|------------------------|-------------------------|-----------------|------------------|
| [M+2H]+3OH | 2            | 1002.4656              | 1002.4570               | -0.0172         | -8.6             |
| b2         | 1            | 215.1026               | 215.1009                | -0.0017         | -7.9             |
| y3+OH      | 1            | 260.1241               | 260.1221                | -0.0020         | -7.7             |
| y4+OH      | 1            | 331.1612               | 331.1583                | -0.0029         | -8.8             |
| b4         | 1            | 400.1827               | 400.1793                | -0.0034         | -8.5             |
| b5         | 1            | 531.2232               | 531.2180                | -0.0052         | -9.8             |
| b6         | 1            | 588.2446               | 588.2390                | -0.0056         | -9.5             |
| y15+3OH    | 2            | 660.3206               | 660.3176                | -0.0060         | -4.6             |
| y16+3OH    | 2            | 708.8469               | 708.8410                | -0.0118         | -8.3             |
| y17+3OH    | 2            | 737.3577               | 737.3521                | -0.0112         | -7.6             |
| y18+3OH    | 2            | 802.8779               | 802.8725                | -0.0108         | -6.7             |
| y11+OH     | 1            | 939.4643               | 939.4553                | -0.0090         | -9.6             |
| y12+2OH    | 1            | 1052.5119              | 1052.5028               | -0.0091         | -8.7             |
| y13+2OH    | 1            | 1149.5647              | 1149.5569               | -0.0078         | -6.8             |
| y15+3OH    | 1            | 1319.6339              | 1319.6233               | -0.0106         | -8.0             |
| y16+3OH    | 1            | 1416.6866              | 1416.6750               | -0.0116         | -8.2             |
| y17+3OH    | 1            | 1473.7081              | 1473.6976               | -0.0105         | -7.1             |

12\_9\_2011Col5a1\_AspNGluC\_1 #2370 RT: 21.30 AV: 1 NL: 8.97E4

T: FTMS + c NSI d Full ms2 1002.46@hcd30.00 [100.00-2000.00]

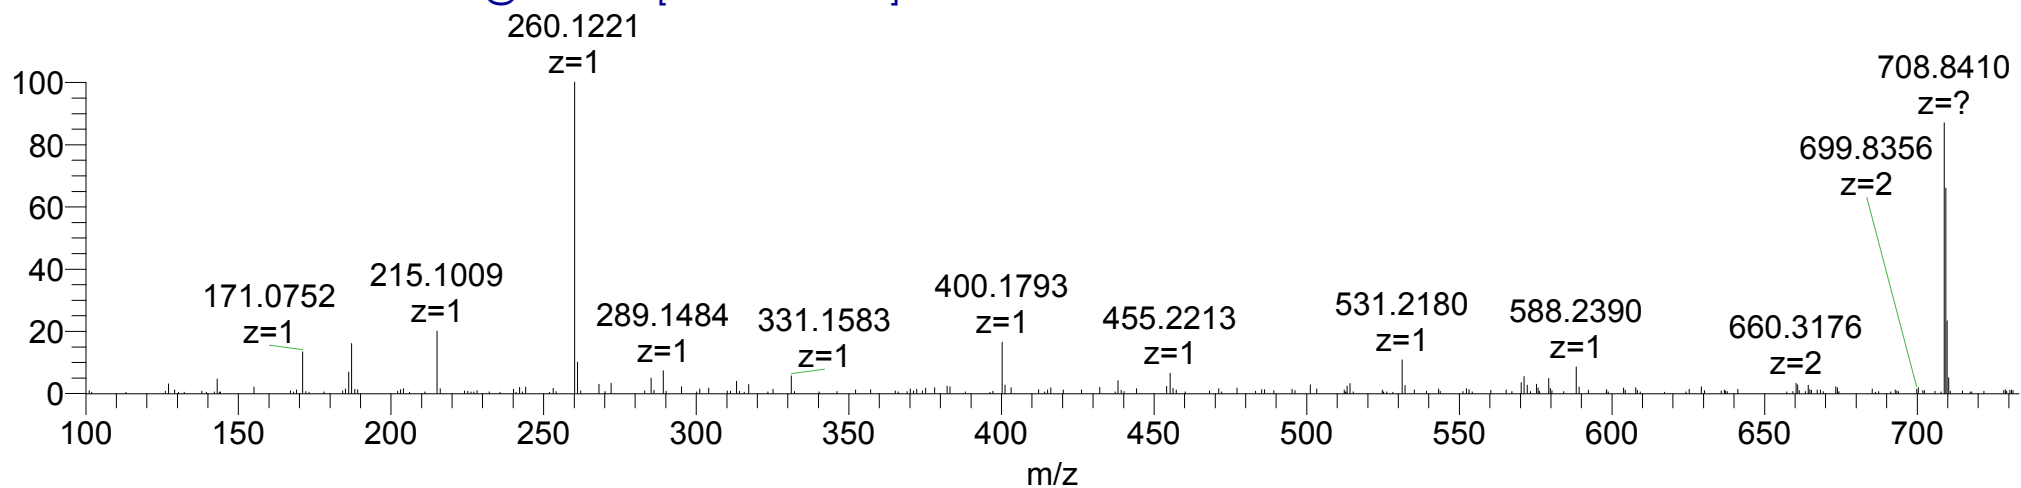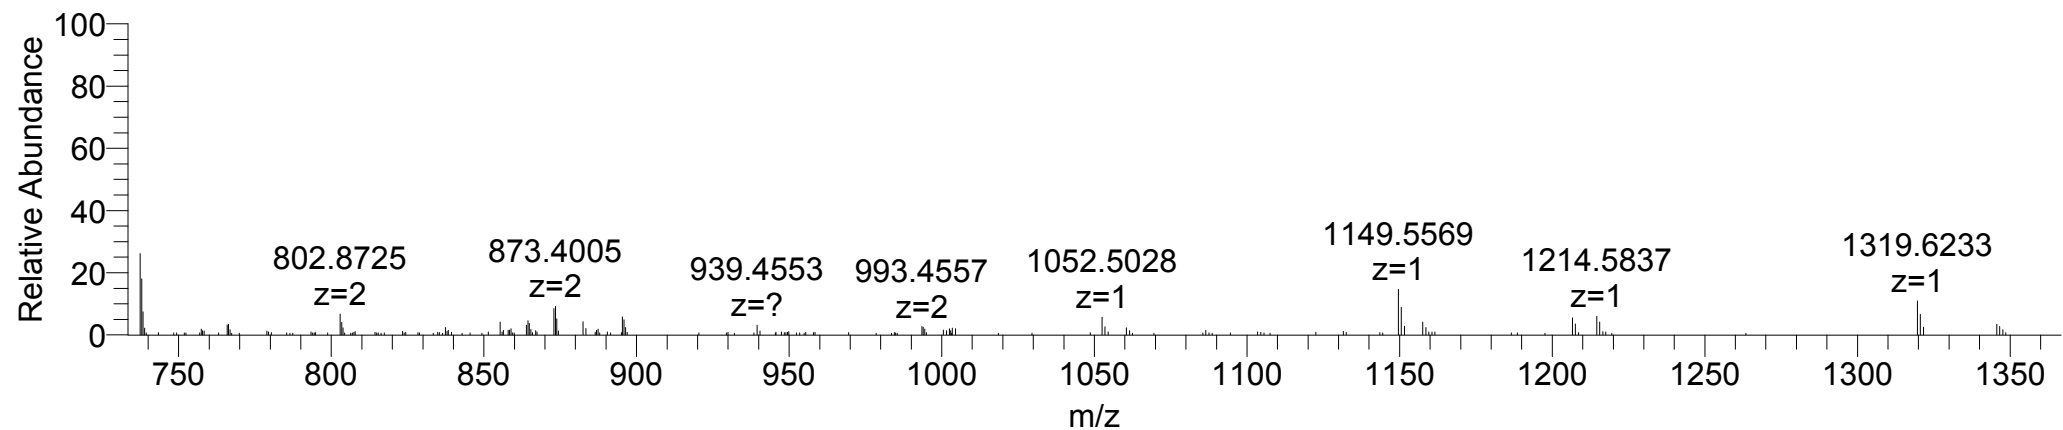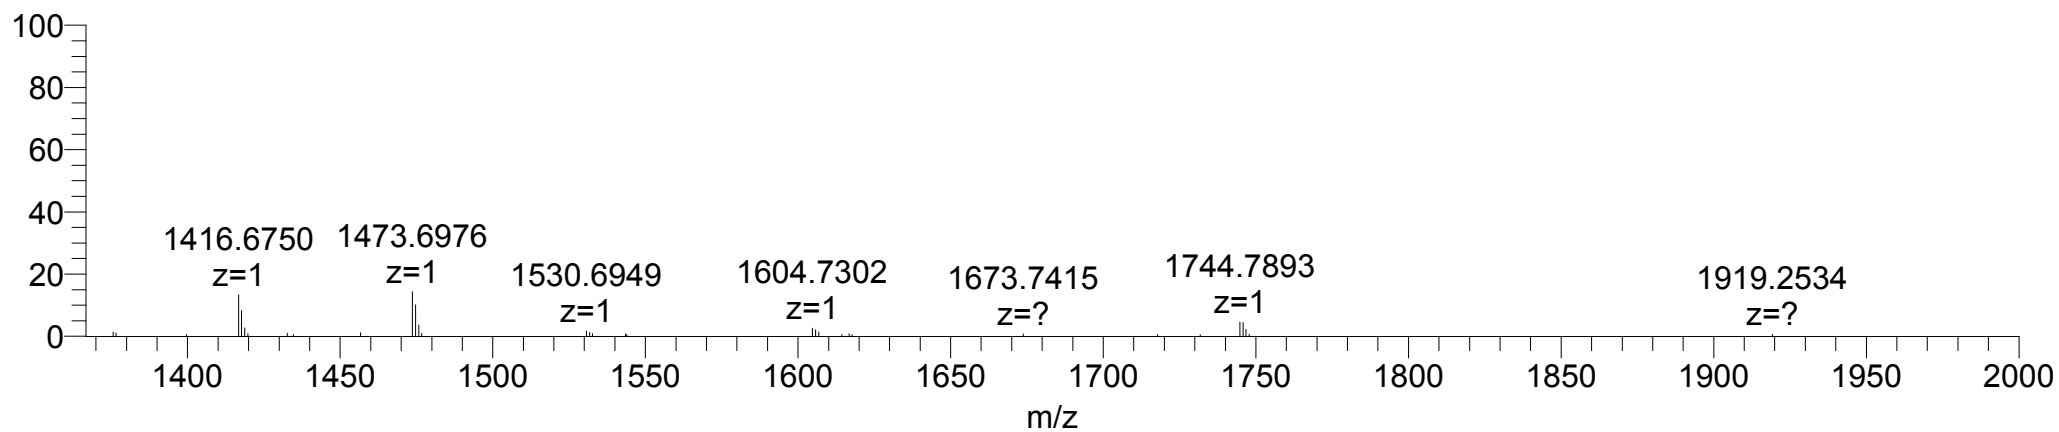



Human

**45.**

**P1278-OH**

#1258-1284: GPSGAPGADGPQGPPGGIGNPGAVGEK

| Ion       | charge state | Theoretical m/z (mono) | Experimental m/z (mono) | Mass error (Da) | Mass error (PPM) |
|-----------|--------------|------------------------|-------------------------|-----------------|------------------|
| [M+3H]+OH | 3            | 772.0401               | 772.0329                | -0.0216         | -9.3             |
| GP/b2     | 1            | 155.0815               | 155.0804                | -0.0011         | -7.1             |
| y3        | 1            | 333.1769               | 333.1742                | -0.0027         | -8.1             |
| b5        | 1            | 370.1721               | 370.1692                | -0.0029         | -7.9             |
| y4        | 1            | 432.2453               | 432.2415                | -0.0038         | -8.8             |
| y13+OH    | 2            | 584.8015               | 584.7968                | -0.0094         | -8.1             |
| y14+OH    | 2            | 633.3279               | 633.3299                | 0.0040          | 3.2              |
| y7+OH     | 1            | 673.3515               | 673.3455                | -0.0060         | -8.9             |
| b9        | 1            | 710.3104               | 710.3065                | -0.0039         | -5.5             |
| y18+OH    | 2            | 802.9050               | 802.8969                | -0.0162         | -10.1            |
| y9+OH     | 1            | 844.4159               | 844.4083                | -0.0076         | -9.0             |
| b13       | 1            | 1049.4647              | 1049.4569               | -0.0078         | -7.4             |
| y12+OH    | 1            | 1071.5429              | 1071.5326               | -0.0103         | -9.6             |
| y13+OH    | 1            | 1168.5957              | 1168.5872               | -0.0085         | -7.3             |
| y14+OH    | 1            | 1265.6484              | 1265.6417               | -0.0067         | -5.3             |
| y15+OH    | 1            | 1322.6699              | 1322.6567               | -0.0132         | -10.0            |

12\_9\_2011Col5a1\_Trypsin\_CE30 #2421 RT: 22.90 AV: 1 NL: 7.63E4

T: FTMS + c NSI d Full ms2 772.37@hcd30.00 [100.00-2000.00]

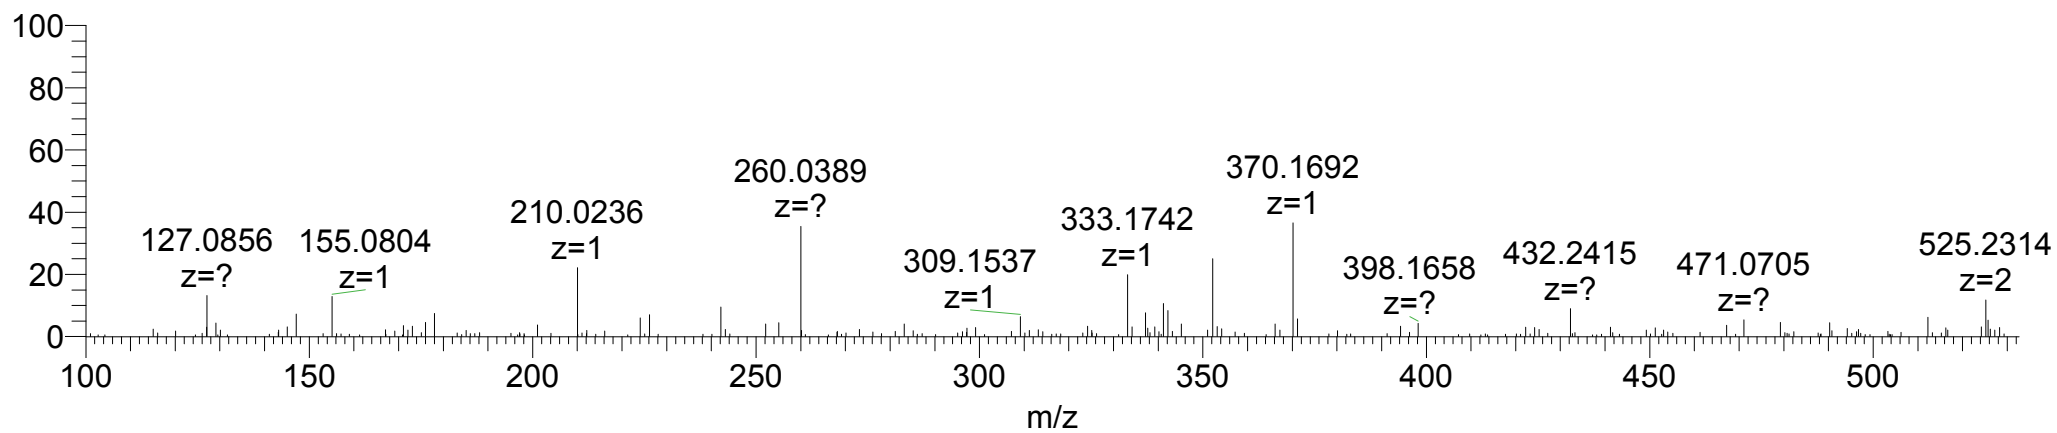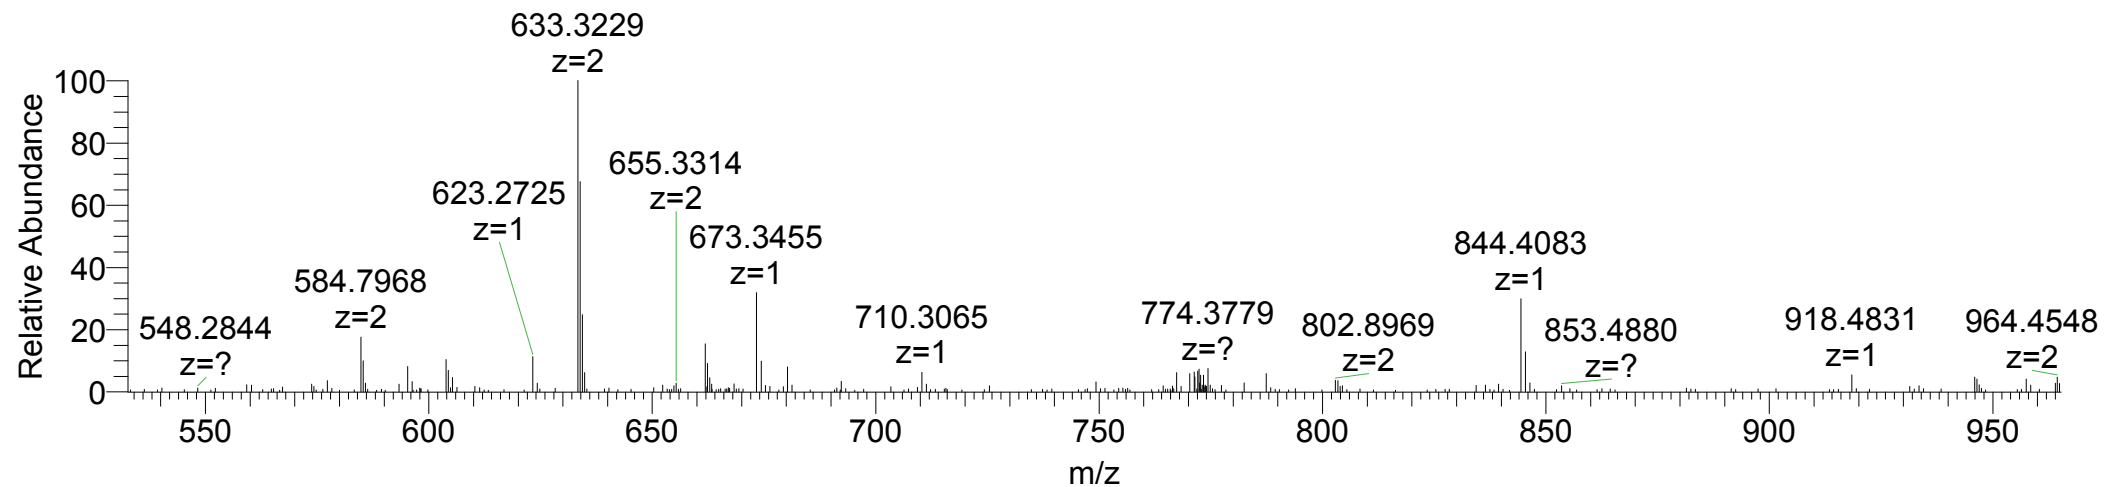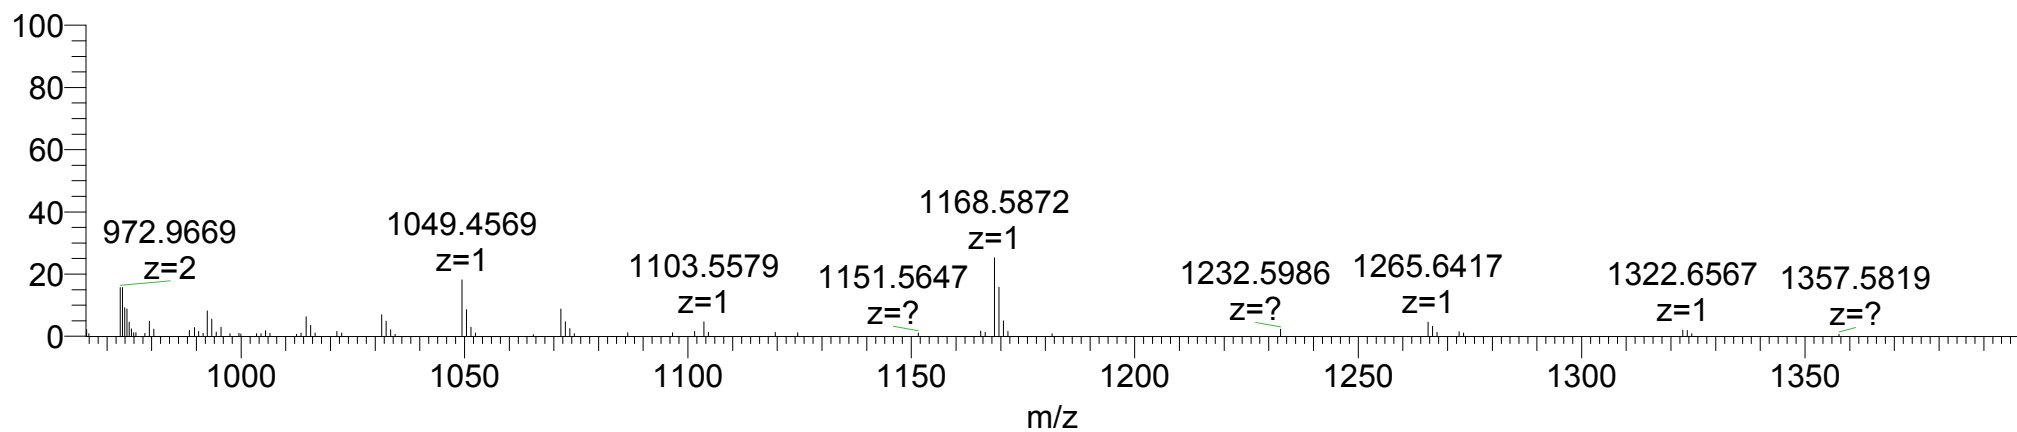

Human

46.

P1287-OH, P1293-OH, P1302-OH, K1305-OH.Gal.Glc

#1285-1308: GEPGEAGEPGLPGEGGPPGPKGER

| Ion                | charge state | Theoretical m/z (mono) | Experimental m/z (mono) | Mass error (Da) | Mass error (PPM) |
|--------------------|--------------|------------------------|-------------------------|-----------------|------------------|
| [M+3H]+4OH+Gal.Glc | 3            | 872.7192               | 872.7123                | -0.0207         | -7.9             |
| PG-28+OH           | 1            | 143.0815               | 143.0804                | -0.0011         | -7.7             |
| PG+OH              | 1            | 171.0764               | 171.0749                | -0.0015         | -8.8             |
| EG/b2/GE           | 1            | 187.0713               | 187.0697                | -0.0016         | -8.6             |
| b3/PGE+OH/EPG+OH   | 1            | 300.1190               | 300.1165                | -0.0025         | -8.4             |
| AGEP+OH/PGEA+OH    | 1            | 371.1561               | 371.1526                | -0.0035         | -9.5             |
| y8+2OH             | 2            | 435.2274               | 435.2231                | -0.0086         | -9.9             |
| b6/EPGEAG+OH       | 1            | 557.2202               | 557.2150                | -0.0052         | -9.3             |
| y13+2OH            | 2            | 633.8073               | 633.8015                | -0.0116         | -9.2             |
| y6+OH              | 1            | 659.3471               | 659.3417                | -0.0054         | -8.2             |
| y7+2OH             | 1            | 772.3948               | 772.3876                | -0.0072         | -9.3             |
| y8+2OH             | 1            | 869.4476               | 869.4407                | -0.0069         | -7.9             |
| y9+2OH             | 1            | 926.4690               | 926.4605                | -0.0085         | -9.2             |
| y10+2OH            | 1            | 983.4905               | 983.4819                | -0.0086         | -8.8             |
| y12+2OH            | 1            | 1169.5545              | 1169.5470               | -0.0075         | -6.4             |
| y13+2OH            | 1            | 1266.6073              | 1266.5957               | -0.0116         | -9.2             |
| y16+3OH            | 1            | 1549.7605              | 1549.7627               | 0.0022          | 1.4              |

12\_9\_2011Col5a1\_Trypsin\_CE40 #1771 RT: 17.23 AV: 1 NL: 2.18E4

T: FTMS + c NSI d Full ms2 873.38@hcd40.00 [100.00-2000.00]

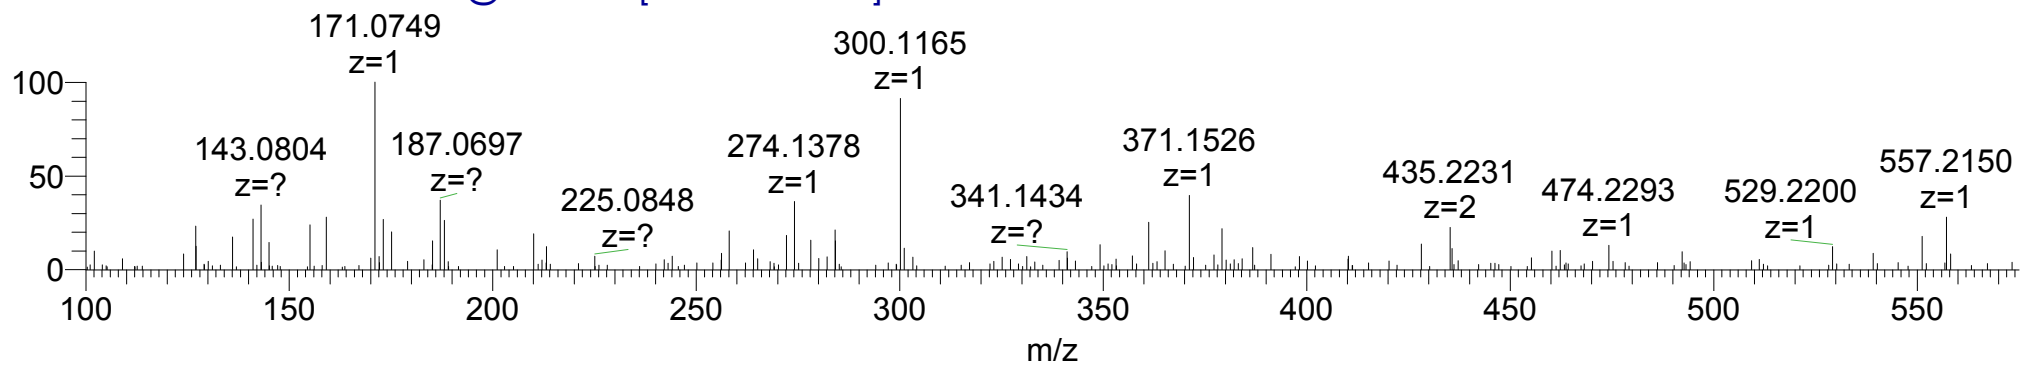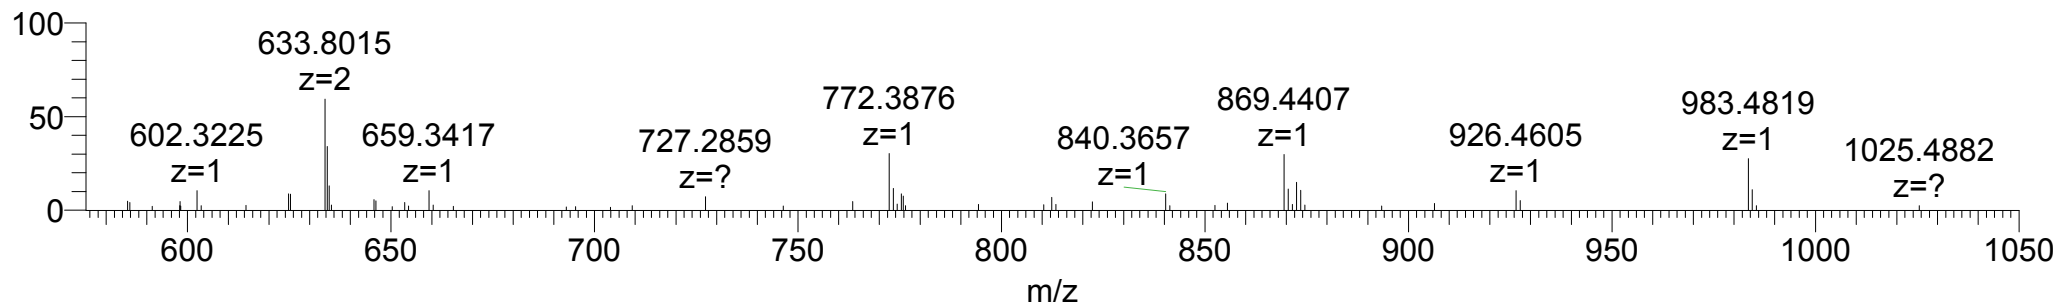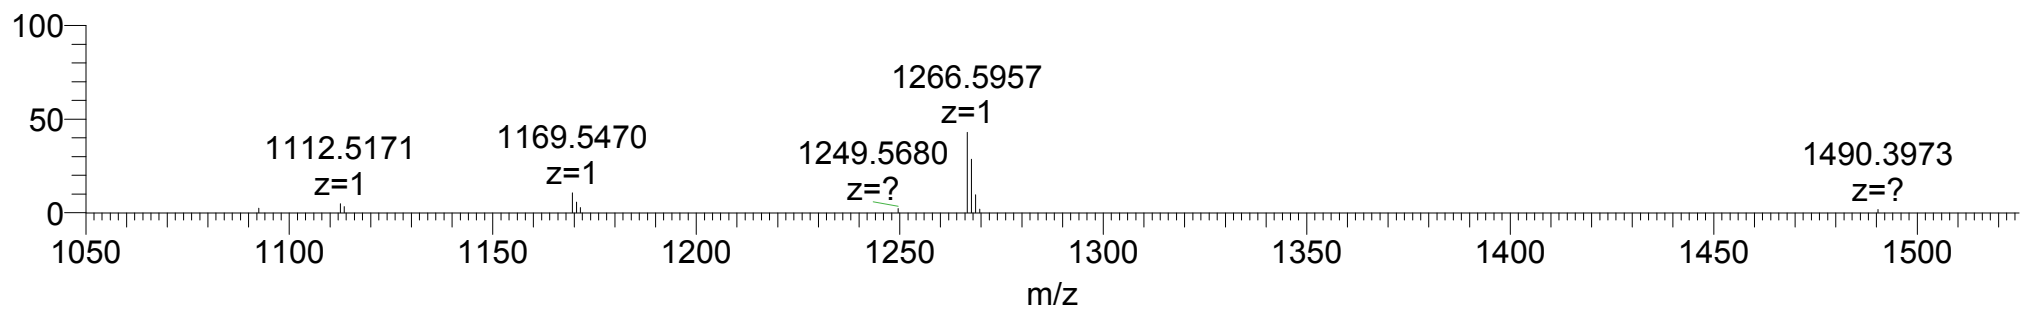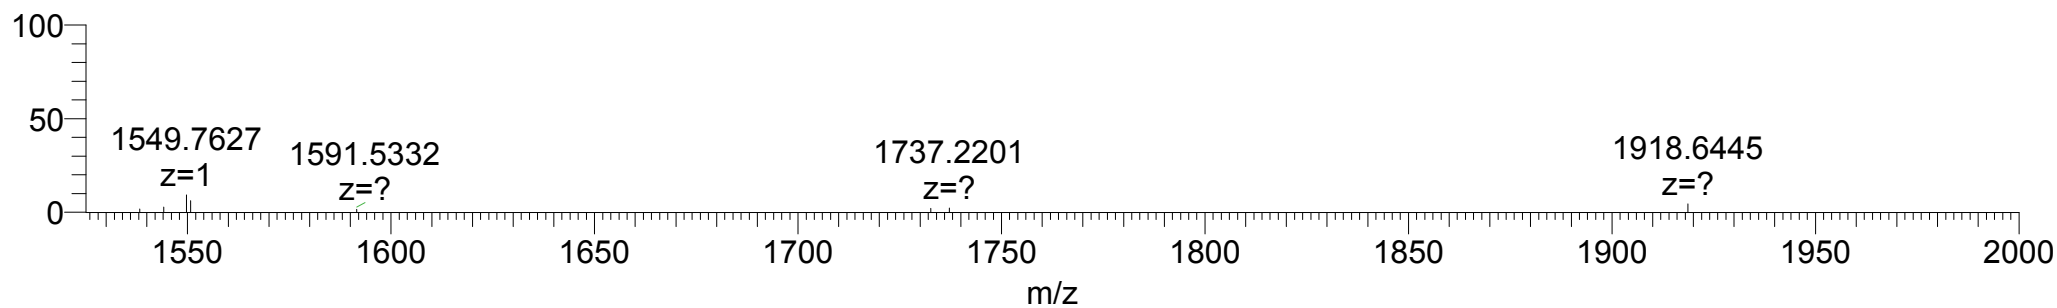

Human

47.

K1311-OH.Gal.Glc, P1323-OH

#1309-1326: GEKGESGPSGAAGPPGPK

| Ion                | charge state | Theoretical m/z (mono) | Experimental m/z (mono) | Mass error (Da) | Mass error (PPM) |
|--------------------|--------------|------------------------|-------------------------|-----------------|------------------|
| [M+3H]+2OH+Gal.Glc | 3            | 645.9604               | 645.9532                | -0.0216         | -11.2            |
| b2/GE              | 1            | 187.0713               | 187.0698                | -0.0015         | -8.1             |
| y2                 | 1            | 244.1656               | 244.1635                | -0.0021         | -8.6             |
| y3                 | 1            | 301.1870               | 301.1843                | -0.0027         | -9.0             |
| y4+OH              | 1            | 414.2347               | 414.2314                | -0.0033         | -8.0             |
| y5+OH              | 1            | 511.2875               | 511.2832                | -0.0043         | -8.4             |
| y6+OH              | 1            | 568.3089               | 568.3033                | -0.0056         | -9.9             |
| y7+OH              | 1            | 639.3461               | 639.3409                | -0.0052         | -8.1             |
| b7+OH              | 1            | 661.2788               | 661.2729                | -0.0059         | -8.9             |
| y8+OH              | 1            | 710.3832               | 710.3777                | -0.0055         | -7.8             |
| y9+OH              | 1            | 767.4046               | 767.3977                | -0.0069         | -9.0             |
| y10+OH             | 1            | 854.4367               | 854.4294                | -0.0073         | -8.6             |
| y11+OH             | 1            | 951.4894               | 951.4813                | -0.0081         | -8.5             |
| y12+OH             | 1            | 1008.5109              | 1008.5034               | -0.0075         | -7.4             |
| y13+OH             | 1            | 1095.5429              | 1095.5356               | -0.0073         | -6.7             |
| y14+OH             | 1            | 1224.5855              | 1224.5720               | -0.0135         | -11.0            |
| y15+OH             | 1            | 1281.6070              | 1281.5974               | -0.0096         | -7.5             |

12\_9\_2011Col5a1\_Trypsin\_CE40 #848 RT: 9.16 AV: 1 NL: 5.59E4

T: FTMS + c NSI d Full ms2 646.29@hcd40.00 [100.00-1950.00]

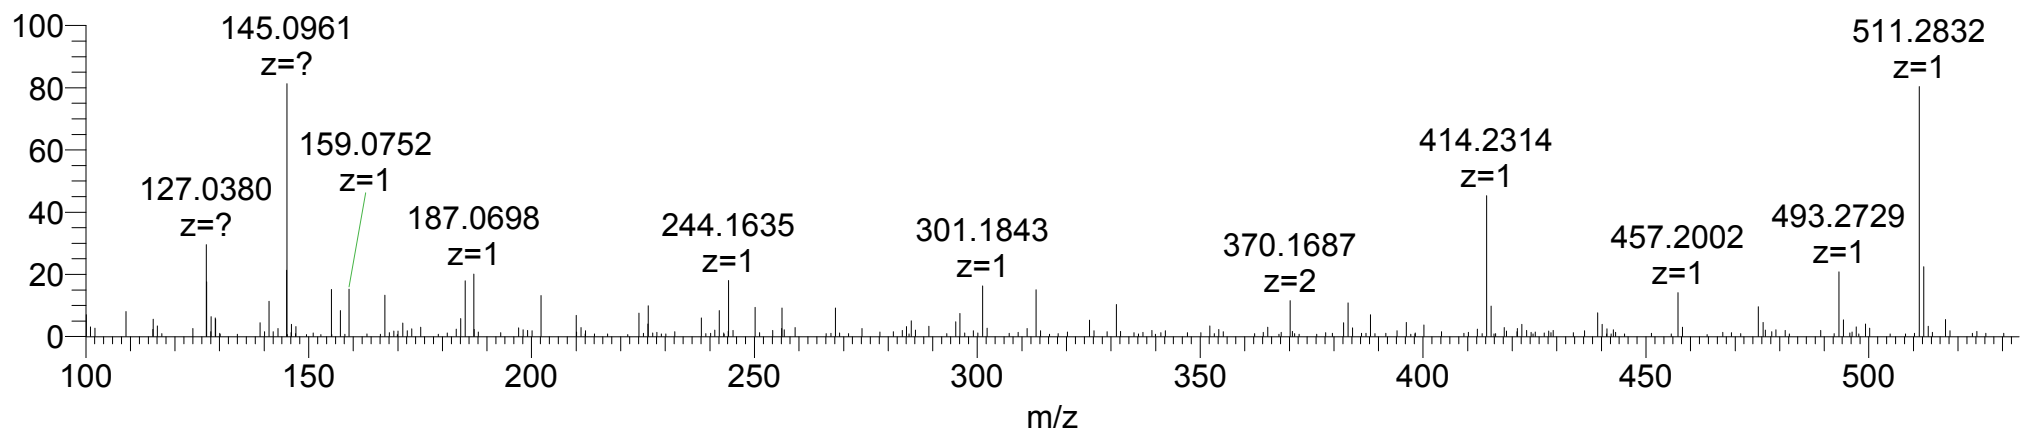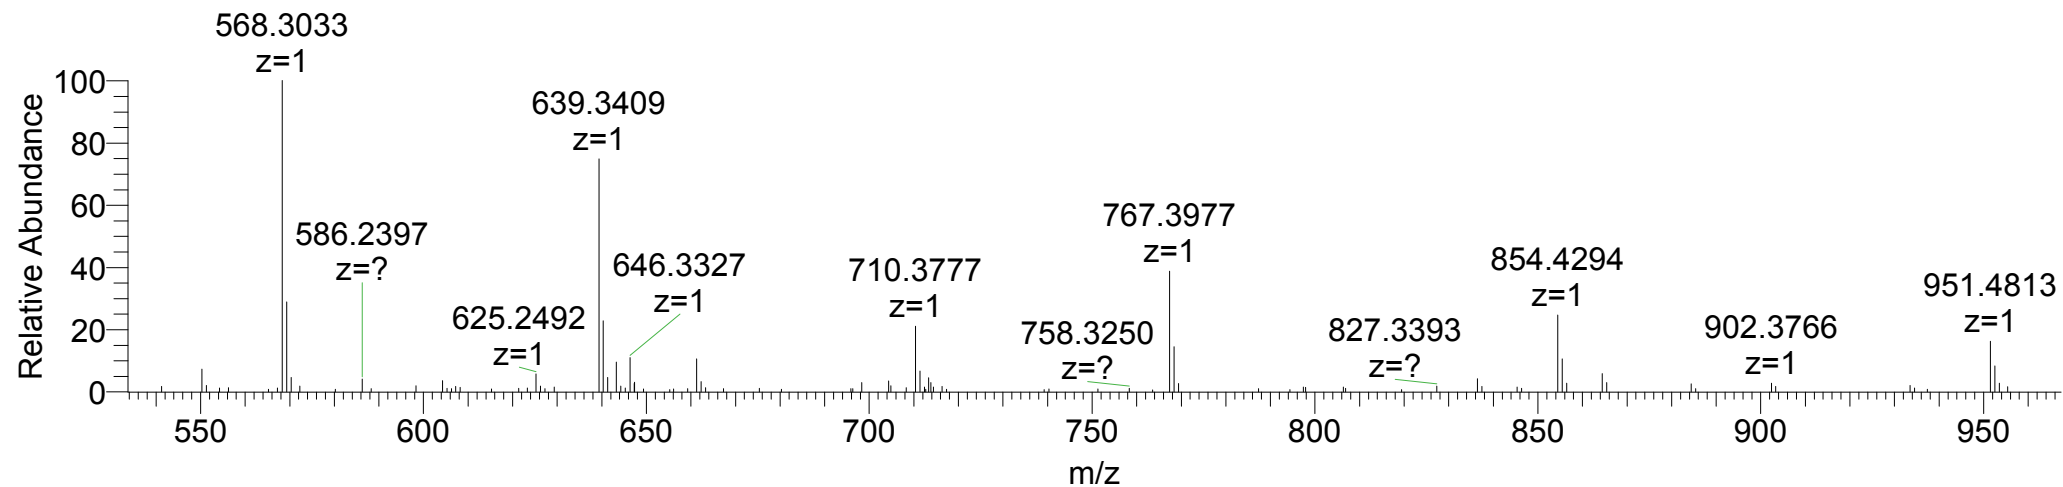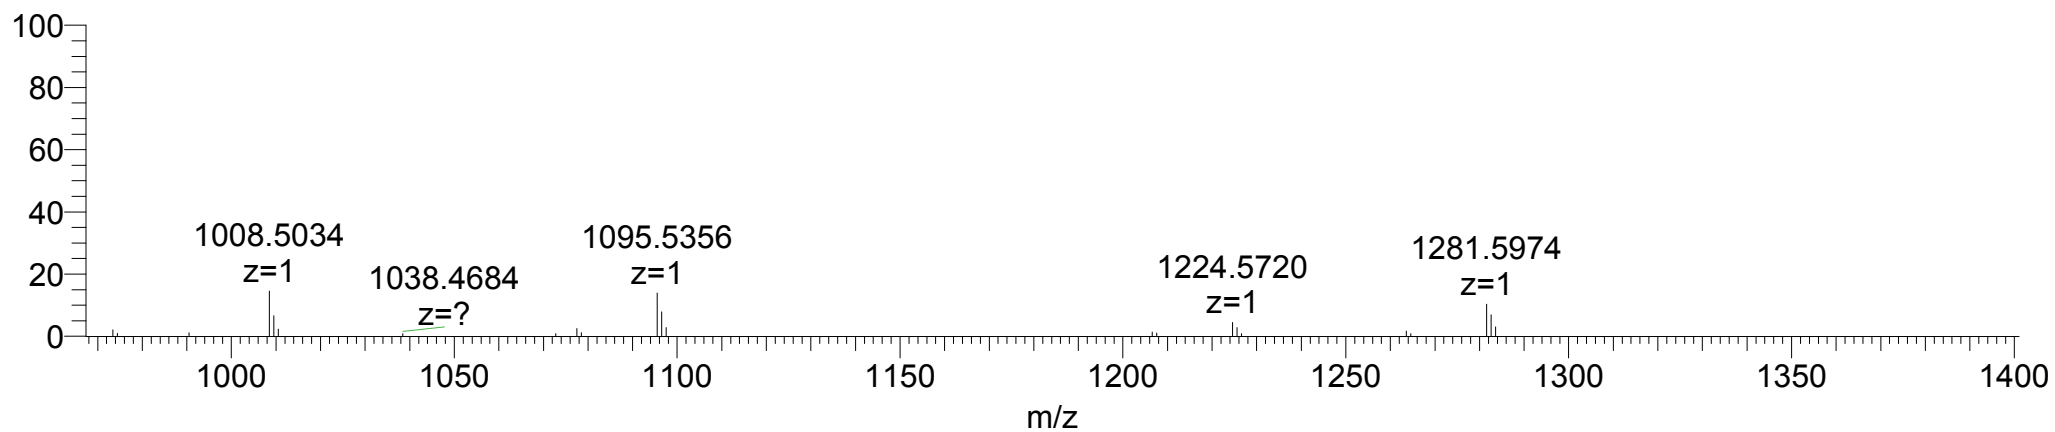

Human

**48.**

**P1338-OH, P1344-OH, P1347-OH, P1353-OH**

#1331-1358: DDGPKGSPGPVGFPGDPGPPGEPGPAGQ

| Ion        | charge state | Theoretical m/z (mono) | Experimental m/z (mono) | Mass error (Da) | Mass error (PPM) |
|------------|--------------|------------------------|-------------------------|-----------------|------------------|
| [M+3H]+5OH | 3            | 874.0526               | 874.0450                | -0.0228         | -8.7             |
| y1         | 1            | 147.0764               | 147.0753                | -0.0011         | -7.5             |
| y2         | 1            | 204.0979               | 204.0963                | -0.0016         | -7.9             |
| y4         | 1            | 372.1878               | 372.1843                | -0.0035         | -9.4             |
| b10+OH     | 2            | 462.7065               | 462.7032                | -0.0066         | -7.1             |
| b11+OH     | 2            | 512.2407               | 512.2363                | -0.0088         | -8.6             |
| y6+OH      | 1            | 542.2569               | 542.2522                | -0.0047         | -8.7             |
| b7         | 1            | 657.2838               | 657.2772                | -0.0066         | -10.1            |
| b9+OH      | 1            | 827.3530               | 827.3467                | -0.0063         | -7.6             |
| y10+2OH    | 1            | 938.4214               | 938.4128                | -0.0086         | -9.2             |
| b11+OH     | 1            | 1023.4742              | 1023.4668               | -0.0074         | -7.2             |
| b12+OH     | 1            | 1080.4956              | 1080.4862               | -0.0094         | -8.7             |
| y12+3OH    | 1            | 1108.4905              | 1108.4823               | -0.0082         | -7.4             |
| b13+OH     | 1            | 1227.5640              | 1227.5515               | -0.0125         | -10.2            |
| y15+4OH    | 1            | 1393.5866              | 1393.5741               | -0.0125         | -9.0             |

**\*Unlocalized sites: P1349-OH?, P1350-OH?**

**Pseudolocalized sites: P1350-OH**

12\_9\_2011Col5a1\_AspNGluC\_3 #2874 RT: 25.56 AV: 1 NL: 3.85E4

T: FTMS + c NSI d Full ms2 874.38@hcd30.00 [100.00-2000.00]

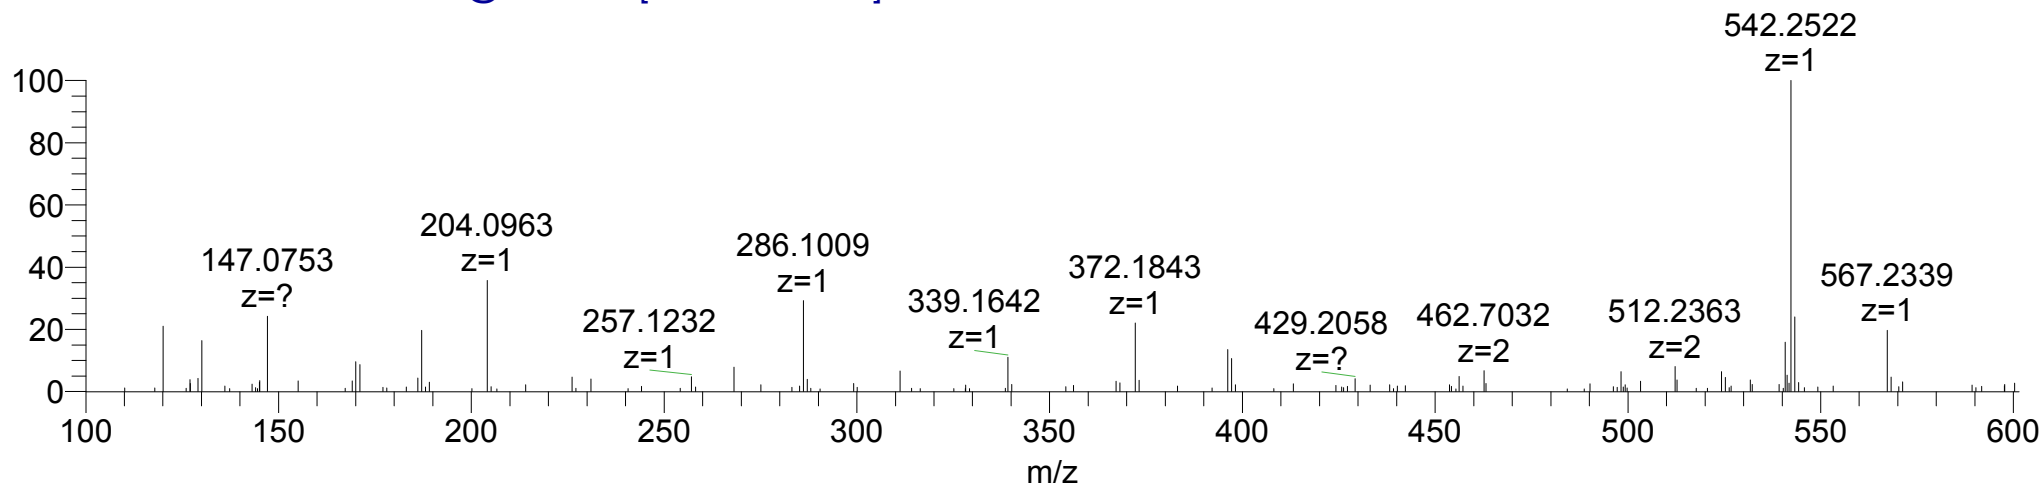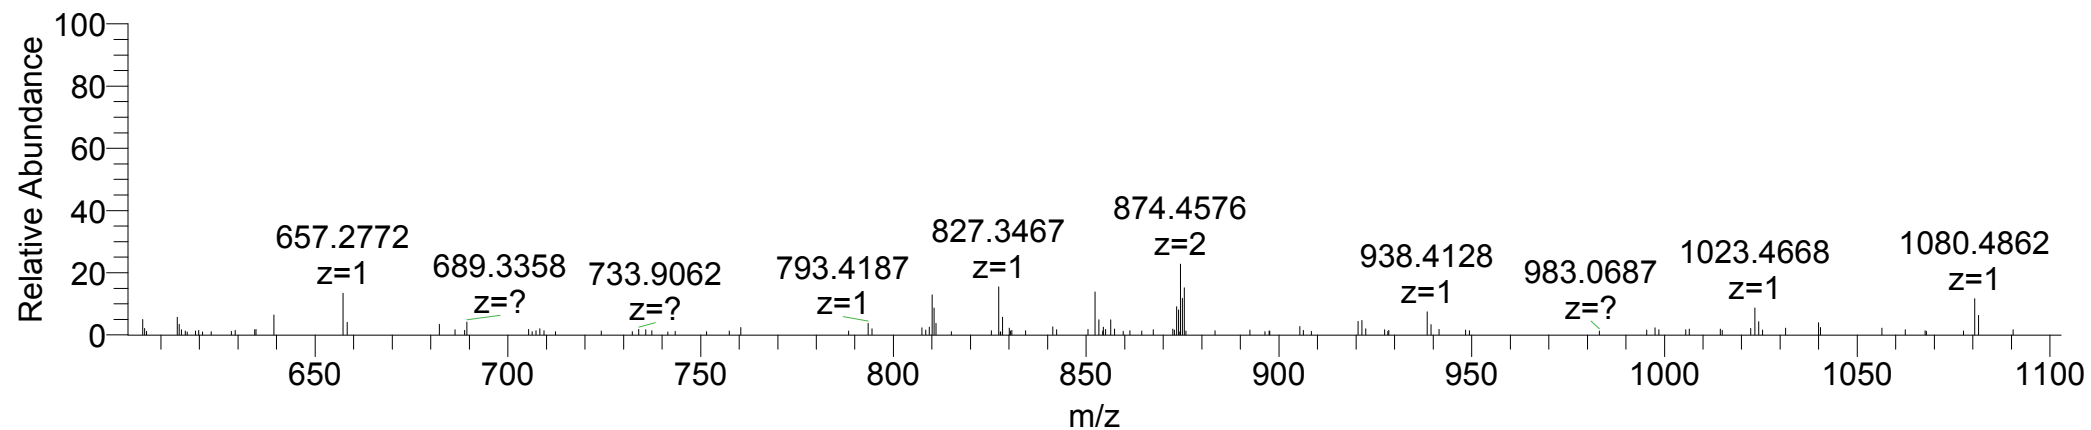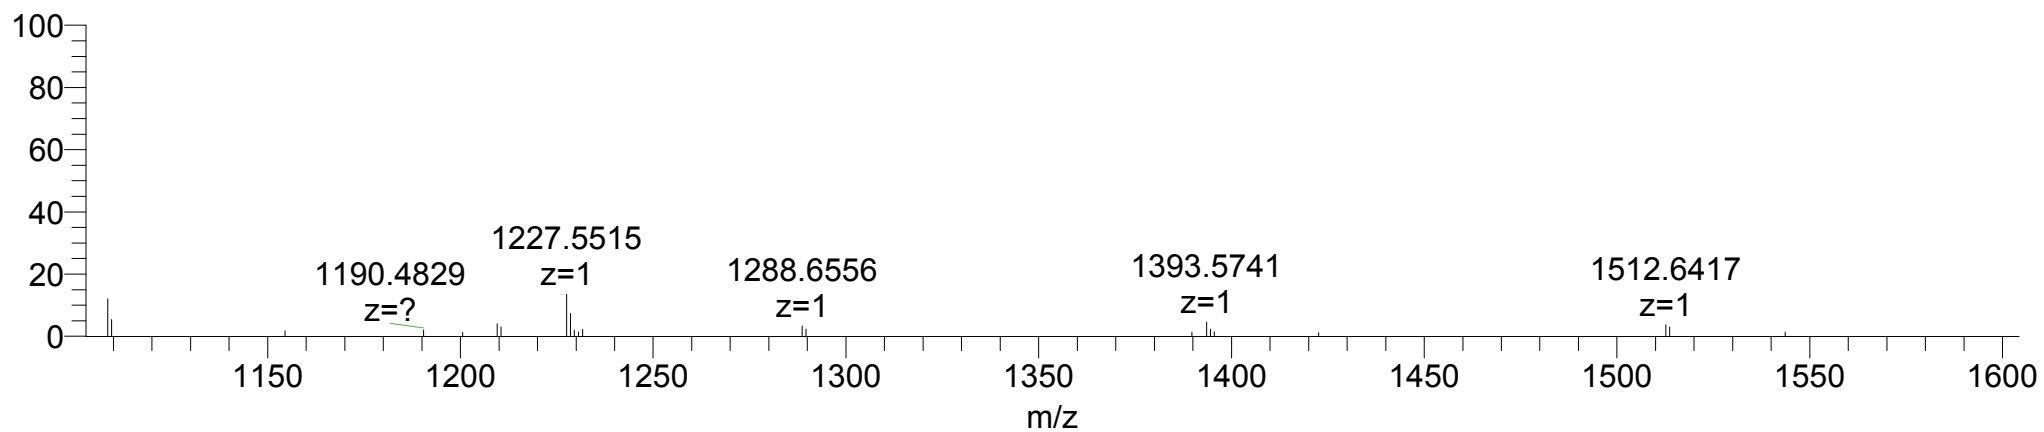



Human

**49.**

**P1350-OH, P1353-OH**

#1346-1358: DPGPPGEPGPAGQ

| Ion        | charge state | Theoretical m/z (mono) | Experimental m/z (mono) | Mass error (Da) | Mass error (PPM) |
|------------|--------------|------------------------|-------------------------|-----------------|------------------|
| [M+2H]+3OH | 2            | 612.2624               | 612.2568                | -0.0112         | -9.2             |
| y1         | 1            | 147.0764               | 147.0755                | -0.0009         | -6.2             |
| y2-NH3     | 1            | 187.0713               | 187.0701                | -0.0012         | -6.4             |
| y2         | 1            | 204.0979               | 204.0965                | -0.0014         | -6.9             |
| y4         | 1            | 372.1878               | 372.1852                | -0.0026         | -7.0             |
| b4+OH      | 1            | 383.1561               | 383.1535                | -0.0026         | -6.8             |
| y5         | 1            | 429.2029               | 429.2065                | 0.0036          | 8.4              |
| y6+OH      | 1            | 542.2569               | 542.2533                | -0.0036         | -6.7             |
| b7+2OH     | 1            | 682.2679               | 682.2635                | -0.0044         | -6.5             |
| b9+3OH     | 1            | 862.3370               | 862.3315                | -0.0055         | -6.4             |
| b11+3OH    | 1            | 1020.4269              | 1020.4207               | -0.0062         | -6.1             |
| b12+3OH    | 1            | 1077.4483              | 1077.4418               | -0.0065         | -6.0             |

**\*Unlocalized sites: P1347-OH?, P1349-OH?**

**Pseudolocalized sites: P1347-OH**

12\_9\_2011Col5a1\_AspNGluC\_1 #1103 RT: 11.04 AV: 1 NL: 1.06E5

T: FTMS + c NSI d Full ms2 612.26@hcd30.00 [100.00-1235.00]

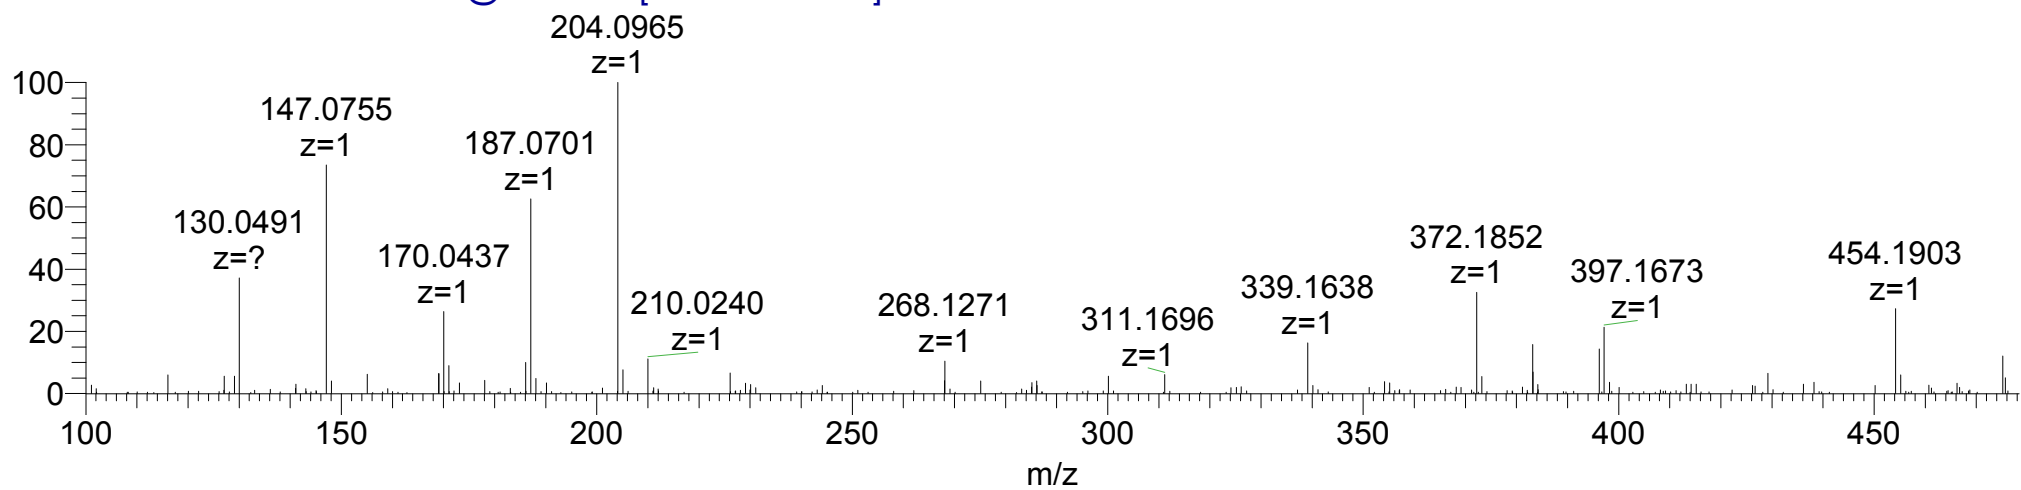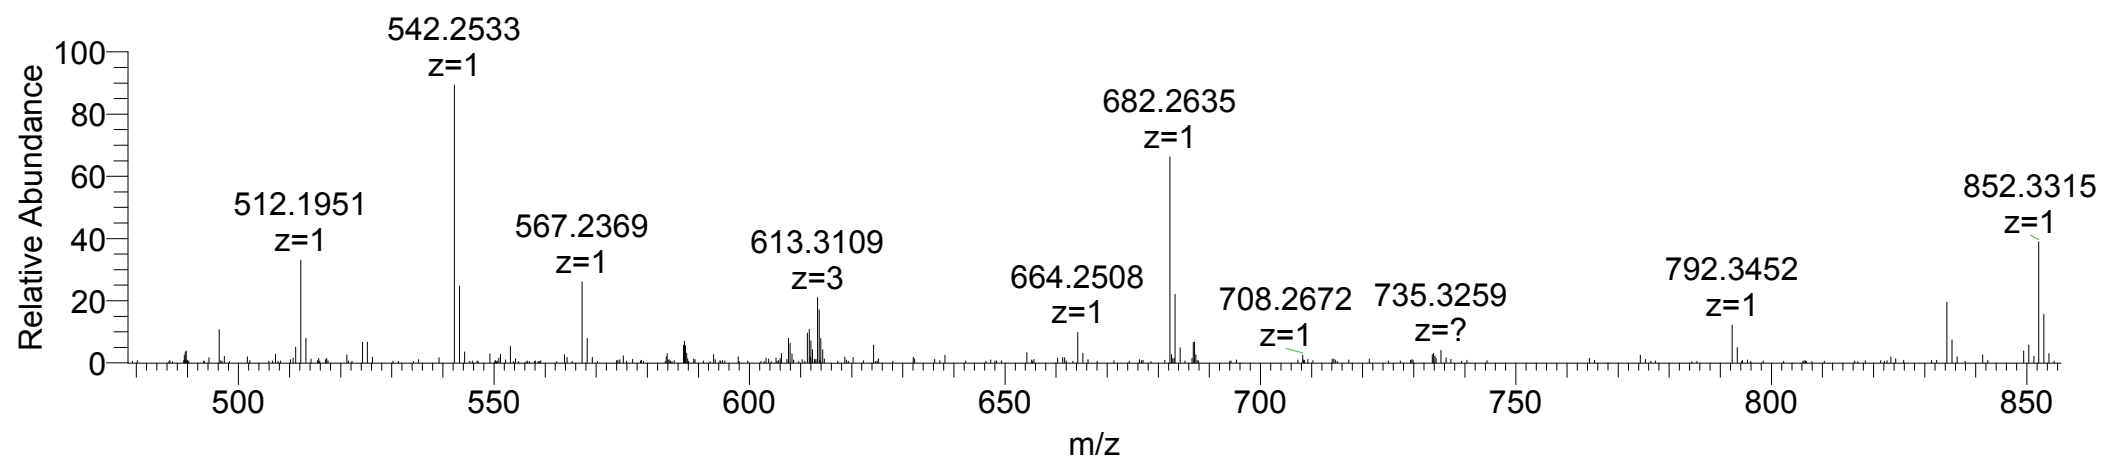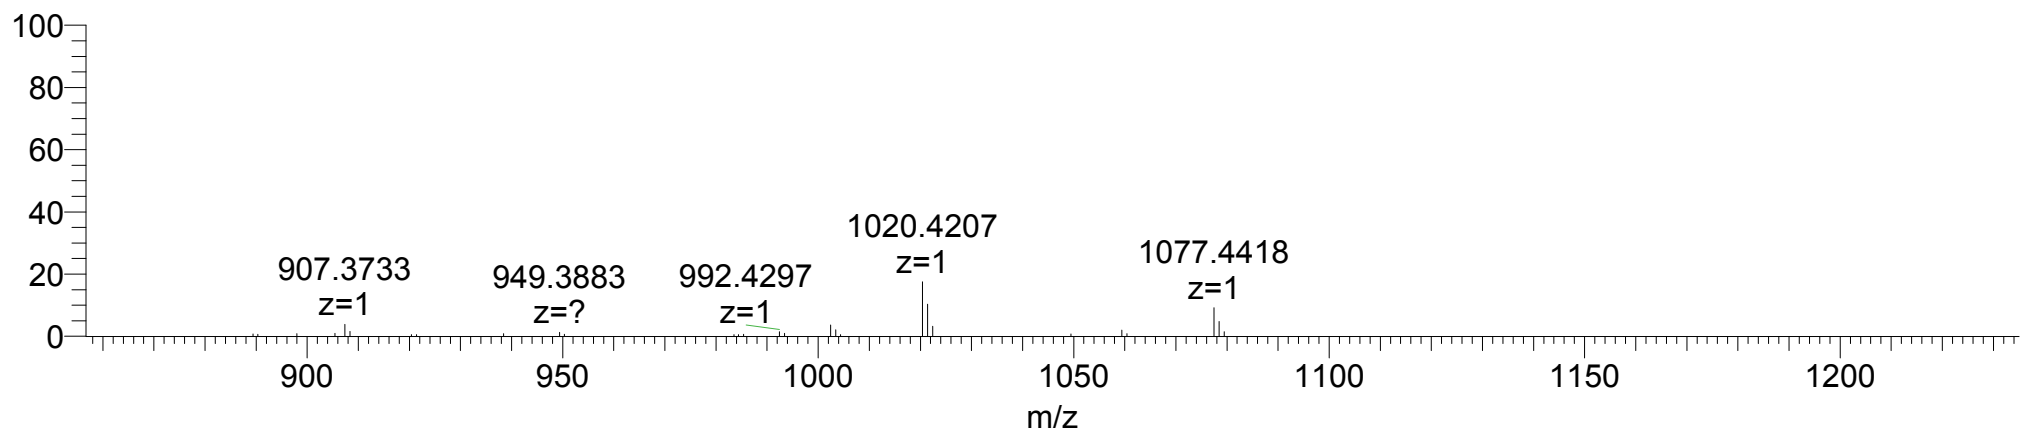

Human

50.

**P1377-OH, P1383-OH, P1389-OH**

#1366-1391: GDDGEPGQTGSPGPTGEPGSPGPPGK and

GDDGEPGQTGSPGPTGEPGSPGPPGK

| Ion         | charge state | Theoretical m/z (mono) | Experimental m/z (mono) | Mass error (Da) | Mass error (PPM) |
|-------------|--------------|------------------------|-------------------------|-----------------|------------------|
| [M+3H]+2OH  | 3            | 788.6789               | 788.6719                | -0.0210         | -8.9             |
| b2          | 1            | 173.0557               | 173.0542                | -0.0015         | -8.7             |
| y2          | 1            | 204.1343               | 204.1326                | -0.0017         | -8.4             |
| y3+OH       | 1            | 317.1819               | 317.1796                | -0.0023         | -7.3             |
| y7+OH       | 2            | 328.1741               | 328.1716                | -0.0050         | -7.6             |
| y9+OH       | 2            | 405.2112               | 405.2080                | -0.0064         | -7.9             |
| y9+2OH      | 2            | 413.2087               | 413.2051                | -0.0072         | -8.7             |
| b5-2H2O     | 1            | 438.1256               | 438.1218                | -0.0038         | -8.7             |
| b5-H2O      | 1            | 456.1361               | 456.1326                | -0.0035         | -7.7             |
| b5          | 1            | 474.1467               | 474.1426                | -0.0041         | -8.7             |
| y13+OH      | 2            | 597.2935               | 597.2875                | -0.0120         | -10.1            |
| y13+2OH     | 2            | 605.2909               | 605.2877                | -0.0064         | -5.3             |
| y7+OH       | 1            | 655.3410               | 655.3358                | -0.0052         | -7.9             |
| y15+2OH     | 2            | 682.3281               | 682.3228                | -0.0106         | -7.8             |
| y8+OH       | 1            | 712.3624               | 712.3567                | -0.0057         | -8.0             |
| b8          | 1            | 756.2795               | 756.2712                | -0.0083         | -11.0            |
| y9+OH       | 1            | 809.4152               | 809.4080                | -0.0072         | -8.9             |
| y9+2OH      | 1            | 825.4101               | 825.4025                | -0.0076         | -9.2             |
| y21-H2O+2OH | 2            | 936.9398               | 936.9329                | -0.0138         | -7.4             |
| y21+2OH     | 2            | 945.9450               | 945.9376                | -0.0148         | -7.8             |
| y11+OH      | 1            | 995.4793               | 995.4716                | -0.0077         | -7.7             |
| y11+2OH     | 1            | 1011.4742              | 1011.4652               | -0.0090         | -8.9             |
| y15+2OH     | 1            | 1363.6488              | 1363.6389               | -0.0099         | -7.3             |

12\_9\_2011Col5a1\_Trypsin\_CE30 #1508 RT: 15.28 AV: 1 NL: 4.39E4

T: FTMS + c NSI d Full ms2 789.01@hcd30.00 [100.00-2000.00]

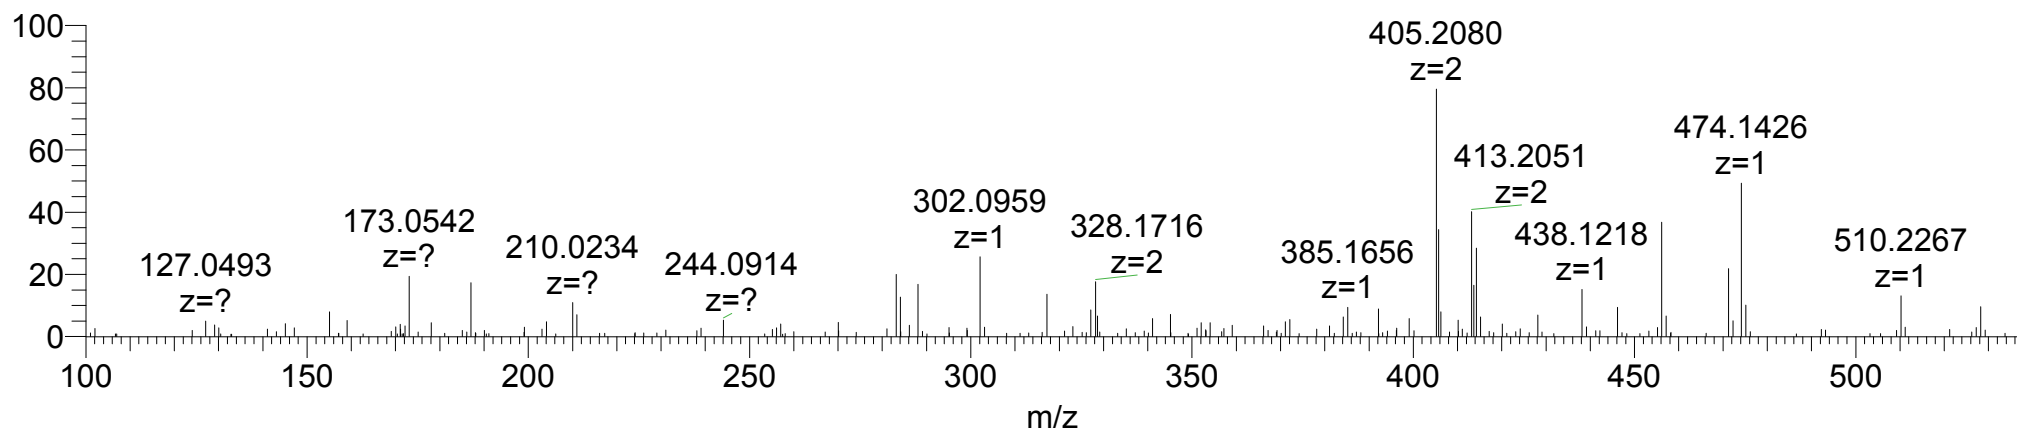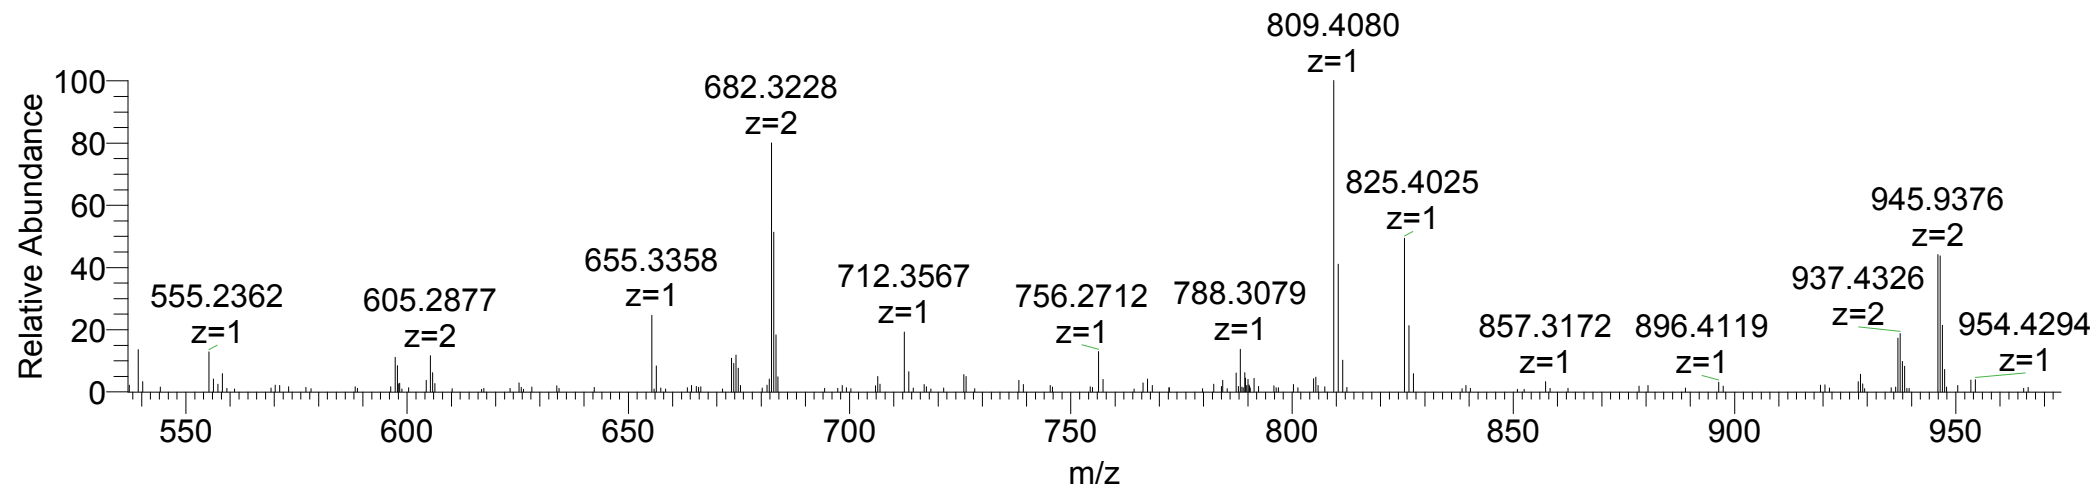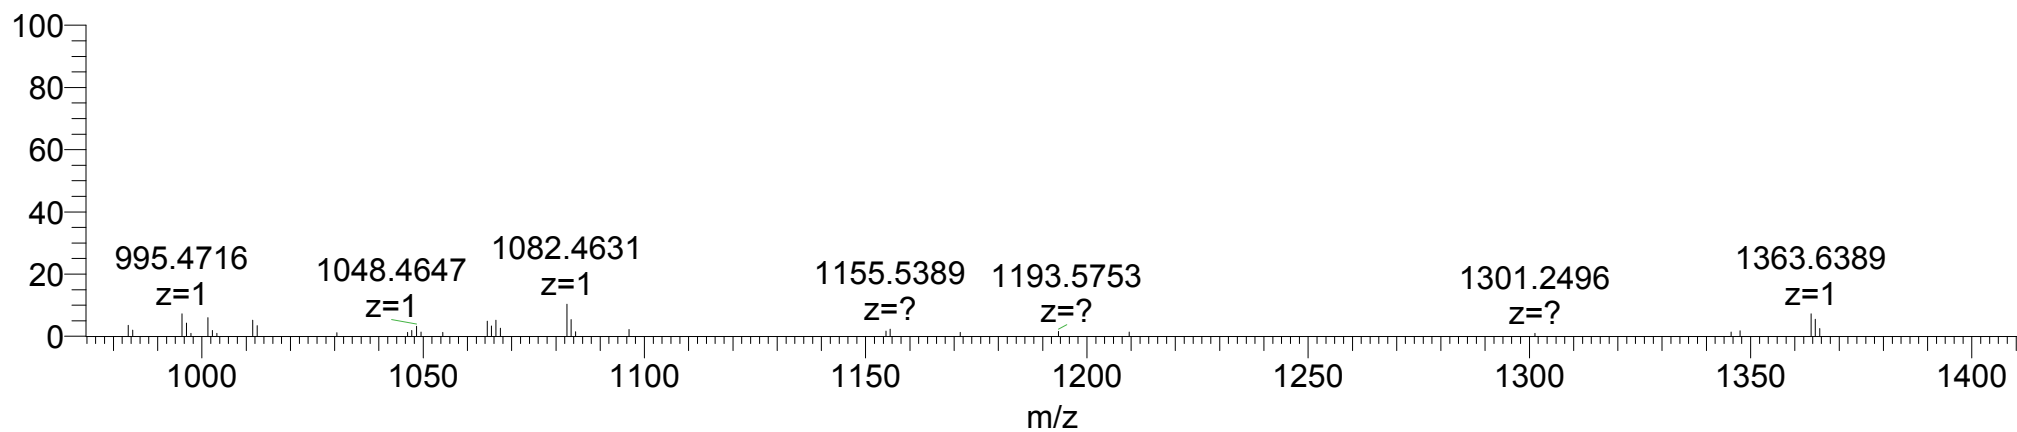

Human

**51.**

**P1395-OH**

#1393-1403: GPPGPAGPEGR

| Ion       | charge state | Theoretical m/z (mono) | Experimental m/z (mono) | Mass error (Da) | Mass error (PPM) |
|-----------|--------------|------------------------|-------------------------|-----------------|------------------|
| [M+2H]+OH | 2            | 504.2489               | 504.2444                | -0.0090         | -8.9             |
| b2/GP     | 1            | 155.0815               | 155.0803                | -0.0012         | -7.8             |
| y2        | 1            | 232.1404               | 232.1384                | -0.0020         | -8.7             |
| b3+OH     | 1            | 268.1292               | 268.1270                | -0.0022         | -8.2             |
| y7        | 2            | 342.1772               | 342.1742                | -0.0060         | -8.8             |
| y9+OH     | 2            | 427.2118               | 427.2081                | -0.0074         | -8.7             |
| y10+OH    | 2            | 475.7381               | 475.7342                | -0.0078         | -8.2             |
| y5        | 1            | 515.2572               | 515.2528                | -0.0044         | -8.6             |
| b7+OH     | 1            | 550.2620               | 550.2580                | -0.0040         | -7.3             |
| y6        | 1            | 586.2944               | 586.2891                | -0.0053         | -9.1             |
| y7        | 1            | 683.3471               | 683.3414                | -0.0057         | -8.4             |
| y8        | 1            | 740.3686               | 740.3622                | -0.0064         | -8.7             |
| y9+OH     | 1            | 853.4163               | 853.4077                | -0.0086         | -10.1            |

12\_9\_2011Col5a1\_ArgC\_3 #1001 RT: 10.46 AV: 1 NL: 1.58E6

T: FTMS + c NSI d Full ms2 505.25@hcd30.00 [100.00-1025.00]

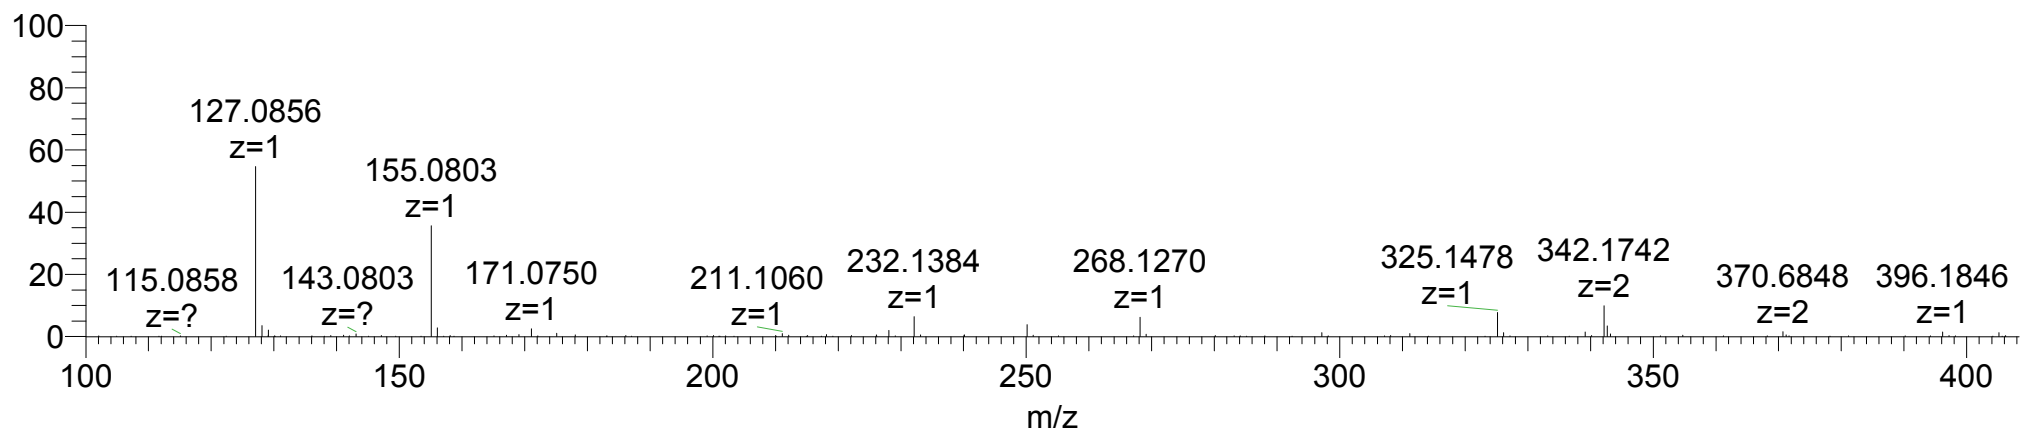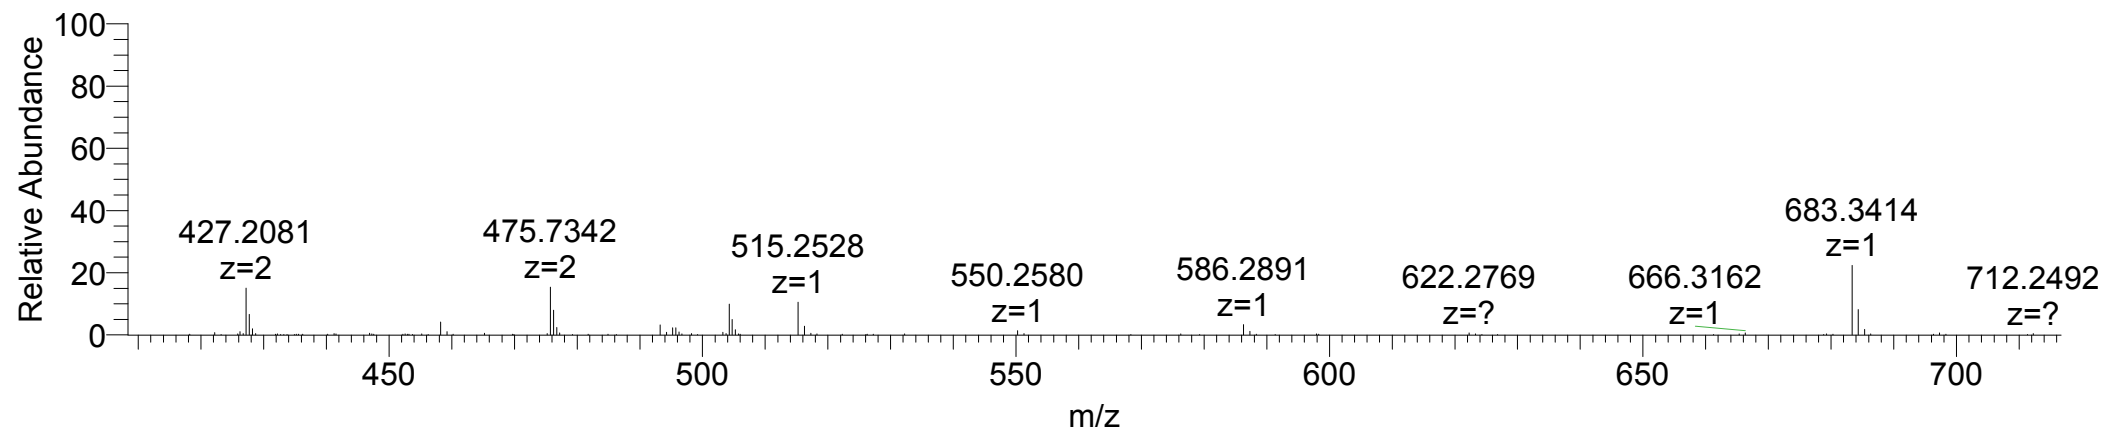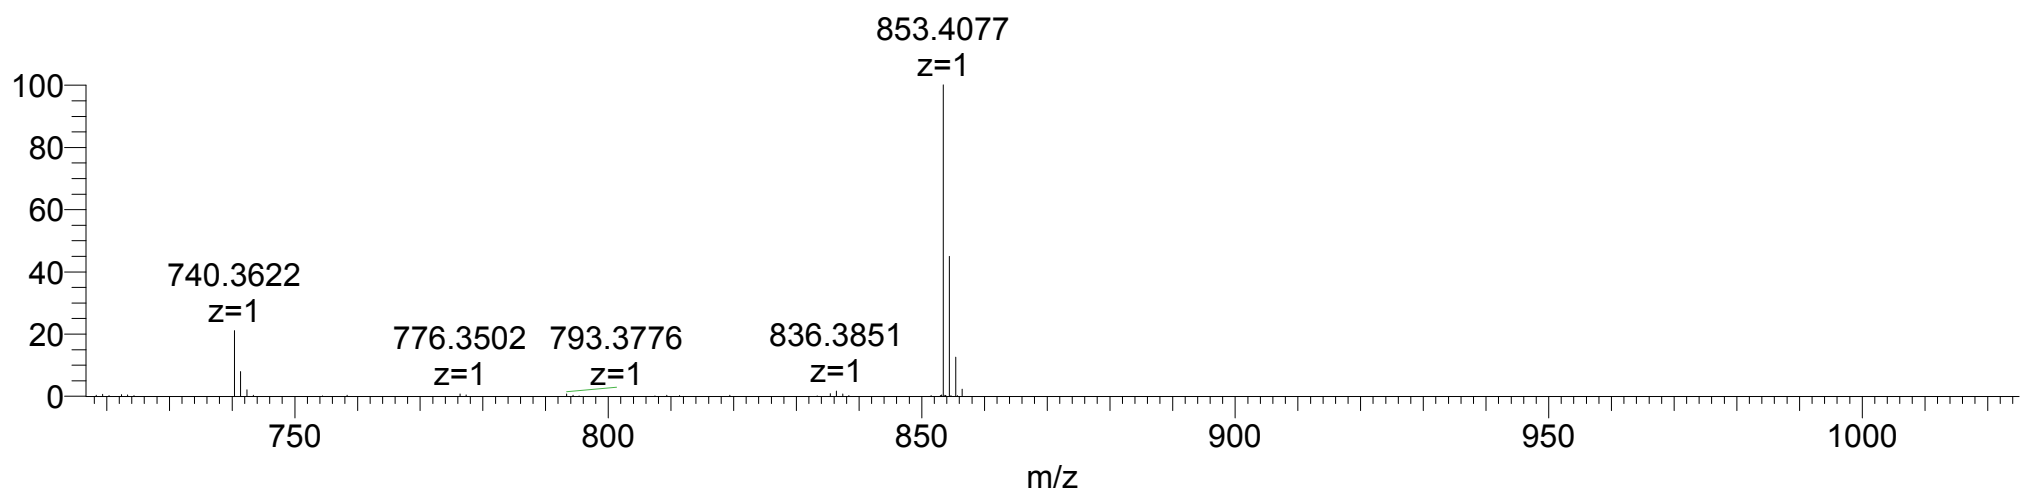

Human

52.

**K1407-OH.Gal.Glc, K1410-OH.Gal.Glc**

#1404-1421: QGEKGAKKGEAGLEGPPGK

| Ion                 | charge state | Theoretical m/z (mono) | Experimental m/z (mono) | Mass error (Da) | Mass error (PPM) |
|---------------------|--------------|------------------------|-------------------------|-----------------|------------------|
| [M+4H]+2OH+2Gal.Glc | 4            | 598.2762               | 598.2699                | -0.0252         | -10.5            |
| y2                  | 1            | 204.1343               | 204.1325                | -0.0018         | -8.9             |
| y5                  | 2            | 228.1343               | 228.1323                | -0.0040         | -8.8             |
| EGP-H2O             | 1            | 266.1135               | 266.1113                | -0.0022         | -8.3             |
| y3                  | 1            | 301.1870               | 301.1845                | -0.0025         | -8.3             |
| y4                  | 1            | 398.2398               | 398.2363                | -0.0035         | -8.8             |
| y5                  | 1            | 455.2613               | 455.2574                | -0.0039         | -8.6             |
| b11-H2O+2OH         | 2            | 514.2438               | 514.2393                | -0.0090         | -8.8             |
| b11+2OH             | 2            | 523.2491               | 523.2448                | -0.0086         | -8.2             |
| [M+3H]-H2O+2OH      | 3            | 575.2918               | 575.2870                | -0.0144         | -8.4             |
| b12+2OH             | 2            | 579.7911               | 579.7867                | -0.0088         | -7.6             |
| [M+3H]+2OH          | 3            | 581.2954               | 581.2903                | -0.0153         | -8.8             |
| y8                  | 1            | 754.4094               | 754.4078                | -0.0016         | -2.1             |
| y9                  | 1            | 825.4465               | 825.4392                | -0.0073         | -8.9             |
| [M+2H]-H2O+2OH      | 1            | 862.4341               | 862.4271                | -0.0070         | -8.1             |
| [M+2H]+2OH          | 2            | 871.4394               | 871.4310                | -0.0168         | -9.7             |
| y11                 | 1            | 1011.5106              | 1011.5020               | -0.0086         | -8.5             |

12\_9\_2011Col5a1\_Trypsin\_CE30 #925 RT: 10.21 AV: 1 NL: 7.42E4

T: FTMS + c NSI d Full ms2 598.27@hcd30.00 [100.00-2000.00]

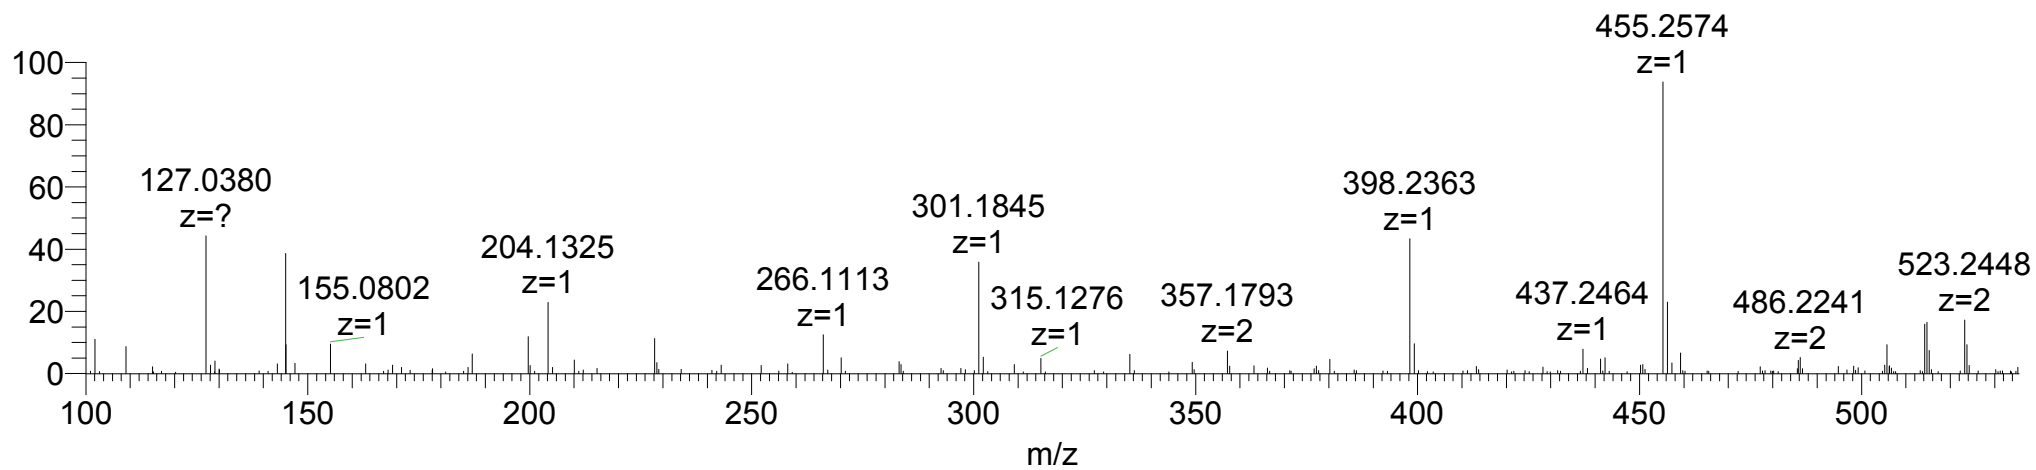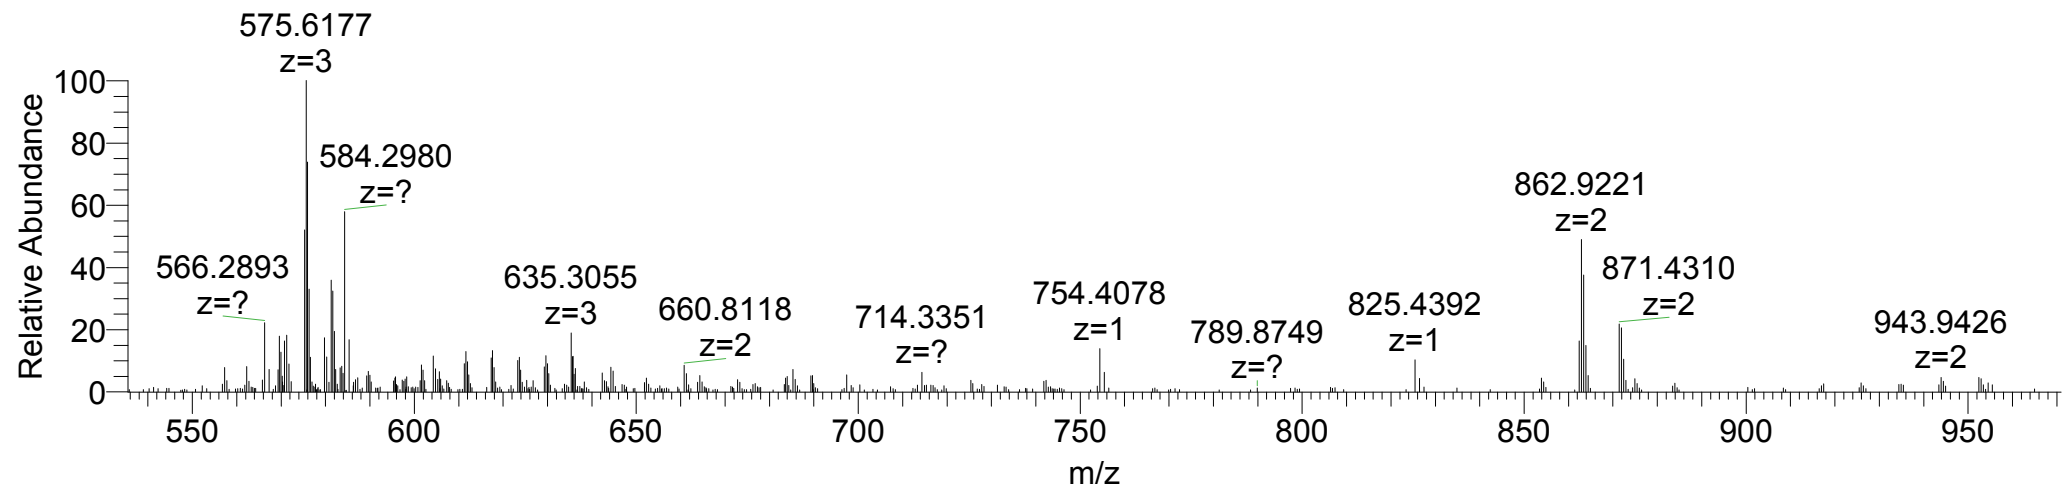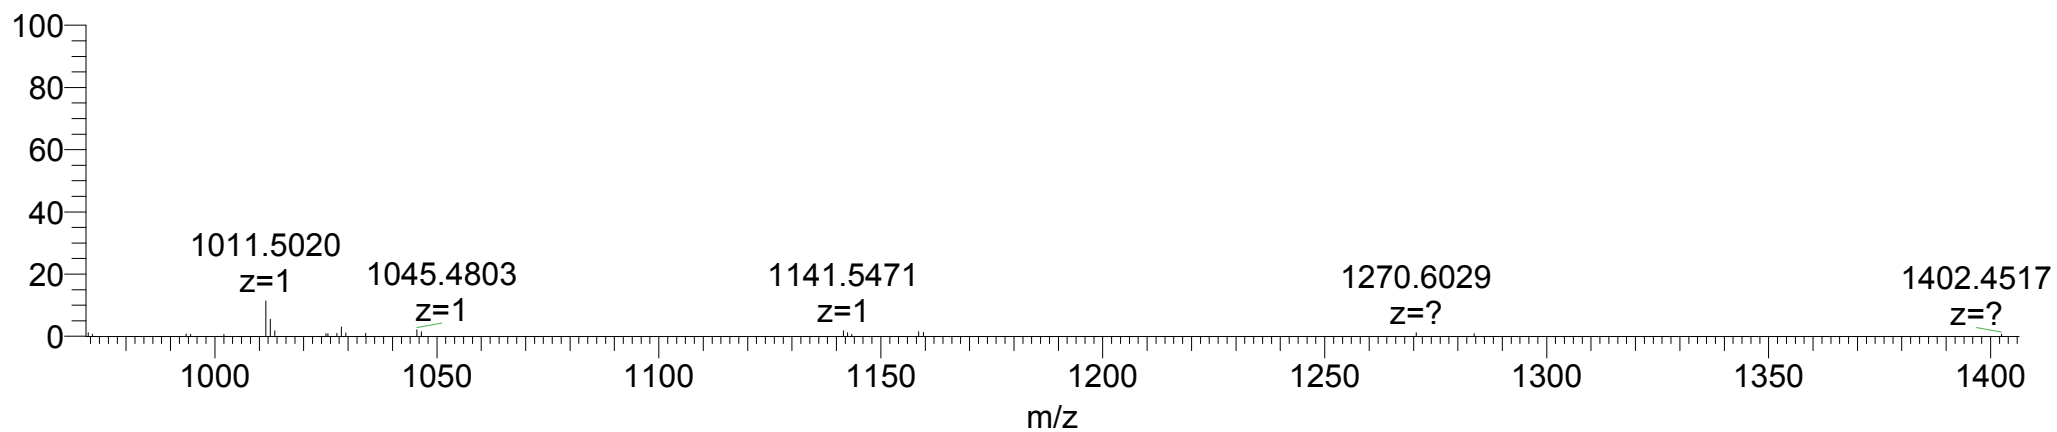



Human

**53.**

**P1419-OH**

#1411-1421: GEAGLEGPPGK

| Ion       | charge state | Theoretical m/z (mono) | Experimental m/z (mono) | Mass error (Da) | Mass error (PPM) |
|-----------|--------------|------------------------|-------------------------|-----------------|------------------|
| [M+2H]+OH | 2            | 514.2564               | 514.2542                | -0.0044         | -4.3             |
| EG-28/a2  | 1            | 159.0764               | 159.0763                | -0.0001         | -0.6             |
| b2/EG     | 1            | 187.0713               | 187.0712                | -0.0001         | -0.5             |
| y2        | 1            | 204.1343               | 204.1342                | -0.0001         | -0.5             |
| b3/EAG    | 1            | 258.1084               | 258.1085                | 0.0001          | 0.4              |
| y3+OH     | 1            | 317.1819               | 317.1820                | 0.0001          | 0.3              |
| y4+OH     | 1            | 414.2347               | 414.2346                | -0.0001         | -0.2             |
| y5+OH     | 1            | 471.2562               | 471.2560                | -0.0002         | -0.4             |
| y6-H2O+OH | 1            | 582.2882               | 582.2878                | -0.0004         | -0.7             |
| y6+OH     | 1            | 600.2988               | 600.2982                | -0.0006         | -1.0             |
| y7+OH     | 1            | 713.3828               | 713.3837                | 0.0009          | 1.3              |
| y8+OH     | 1            | 770.4043               | 770.4028                | -0.0015         | -1.9             |
| y9+OH     | 1            | 841.4414               | 841.4401                | -0.0013         | -1.5             |

11\_7\_2011Collagen\_Denatured #1195 RT: 14.31 AV: 1 NL: 3.55E4

T: FTMS + c NSI d Full ms2 514.25@hcd35.00 [100.00-1040.00]

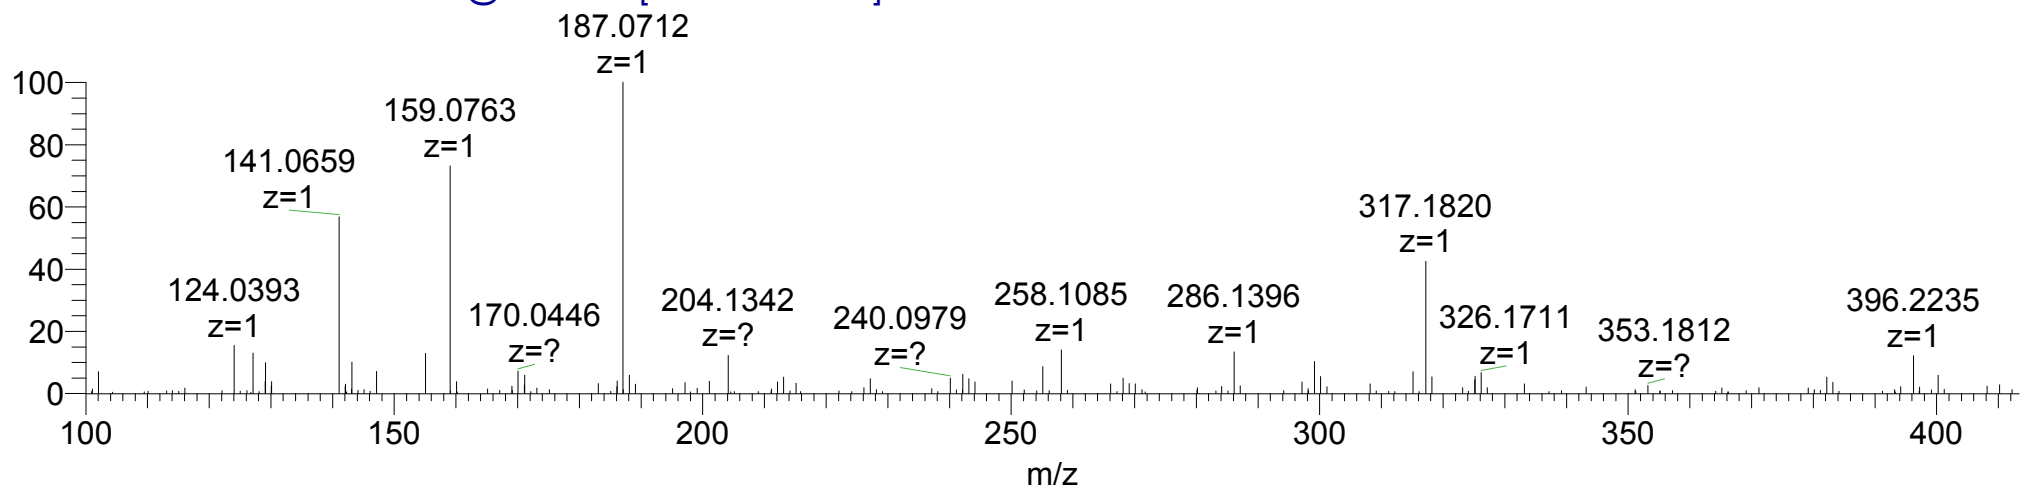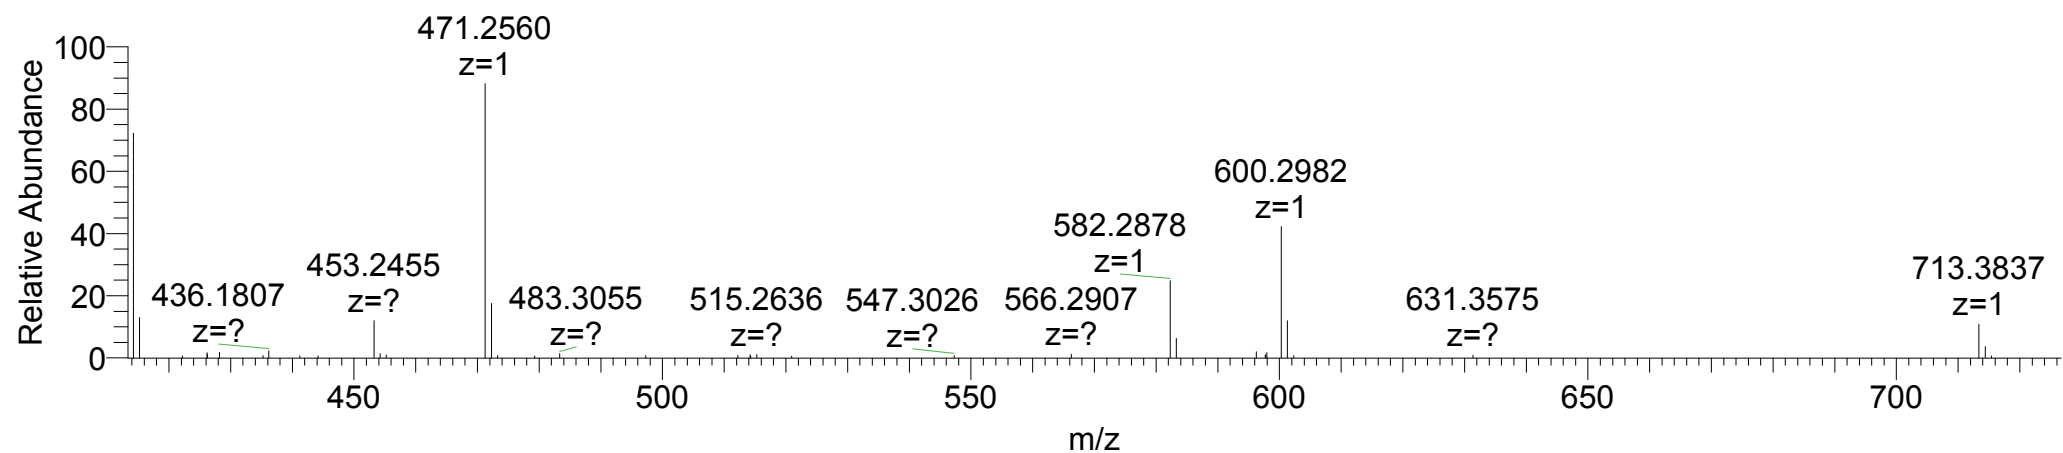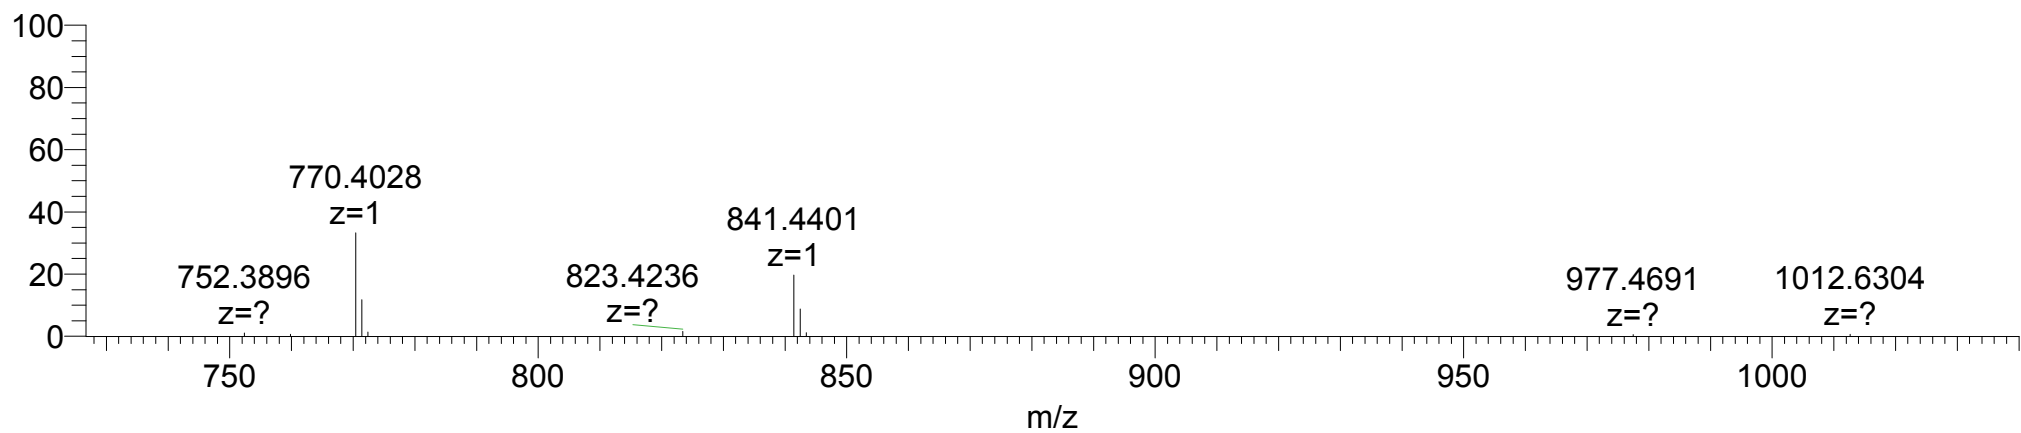

Human

54.

P1431-OH, P1434-OH

#1422-1440: TGPIGPQGAPPGKPGPDGLR

| Ion                      | charge state | Theoretical m/z (mono) | Experimental m/z (mono) | Mass error (Da) | Mass error (PPM) |
|--------------------------|--------------|------------------------|-------------------------|-----------------|------------------|
| [M+3H]+2OH               | 3            | 601.9831               | 601.9777                | -0.0162         | -9.0             |
| K                        | 1            | 129.1022               | 129.1016                | -0.0006         | -4.7             |
| GP                       | 1            | 155.0815               | 155.0806                | -0.0009         | -5.8             |
| PI-28                    | 1            | 183.1492               | 183.1481                | -0.0011         | -6.0             |
| PQ                       | 1            | 226.1186               | 226.1174                | -0.0012         | -5.3             |
| b3                       | 1            | 256.1292               | 256.1278                | -0.0014         | -5.5             |
| PGK+OH/GKP+OH/<br>KPG+OH | 1            | 299.1714               | 299.1695                | -0.0019         | -6.4             |
| y3                       | 1            | 345.2245               | 345.2223                | -0.0022         | -6.4             |
| y7+OH                    | 2            | 364.1903               | 364.1886                | -0.0034         | -4.7             |
| GPQGA-NH3                | 1            | 394.1721               | 394.1695                | -0.0026         | -6.6             |
| y14+2OH                  | 3            | 460.2406               | 460.2396                | -0.0030         | -2.2             |
| y10+2OH                  | 2            | 513.2724               | 513.2688                | -0.0072         | -7.0             |
| y5                       | 1            | 557.3042               | 557.3007                | -0.0035         | -6.3             |
| y12+2OH                  | 2            | 577.3016               | 577.2980                | -0.0072         | -6.2             |
| y6                       | 1            | 614.3257               | 614.3221                | -0.0036         | -5.9             |
| y14+2OH                  | 2            | 689.8573               | 689.8529                | -0.0088         | -6.4             |
| y15+2OH                  | 2            | 718.3680               | 718.3639                | -0.0082         | -5.7             |
| y7+OH                    | 1            | 727.3733               | 727.3685                | -0.0048         | -6.6             |
| y16+2OH                  | 2            | 774.9101               | 774.9059                | -0.0084         | -5.4             |
| y8+OH                    | 1            | 855.4683               | 855.4636                | -0.0047         | -5.5             |
| y9+OH                    | 1            | 912.4898               | 912.4898                | 0.0000          | 0.0              |
| y10+2OH                  | 1            | 1025.5374              | 1025.5311               | -0.0063         | -6.1             |
| y12+2OH                  | 1            | 1153.5960              | 1153.5896               | -0.0064         | -5.6             |

12\_9\_2011Col5a1\_Trypsin\_CE35 #2032 RT: 19.05 AV: 1 NL: 1.07E5

T: FTMS + c NSI d Full ms2 602.31@hcd35.00 [100.00-1820.00]

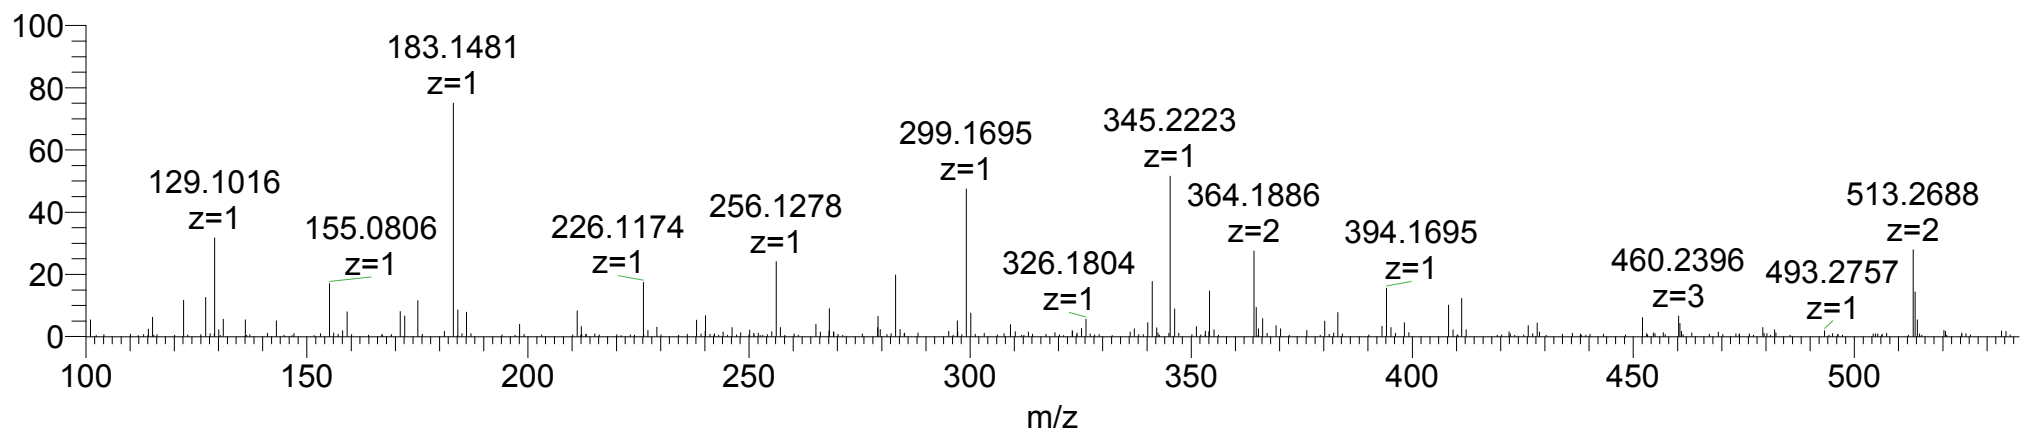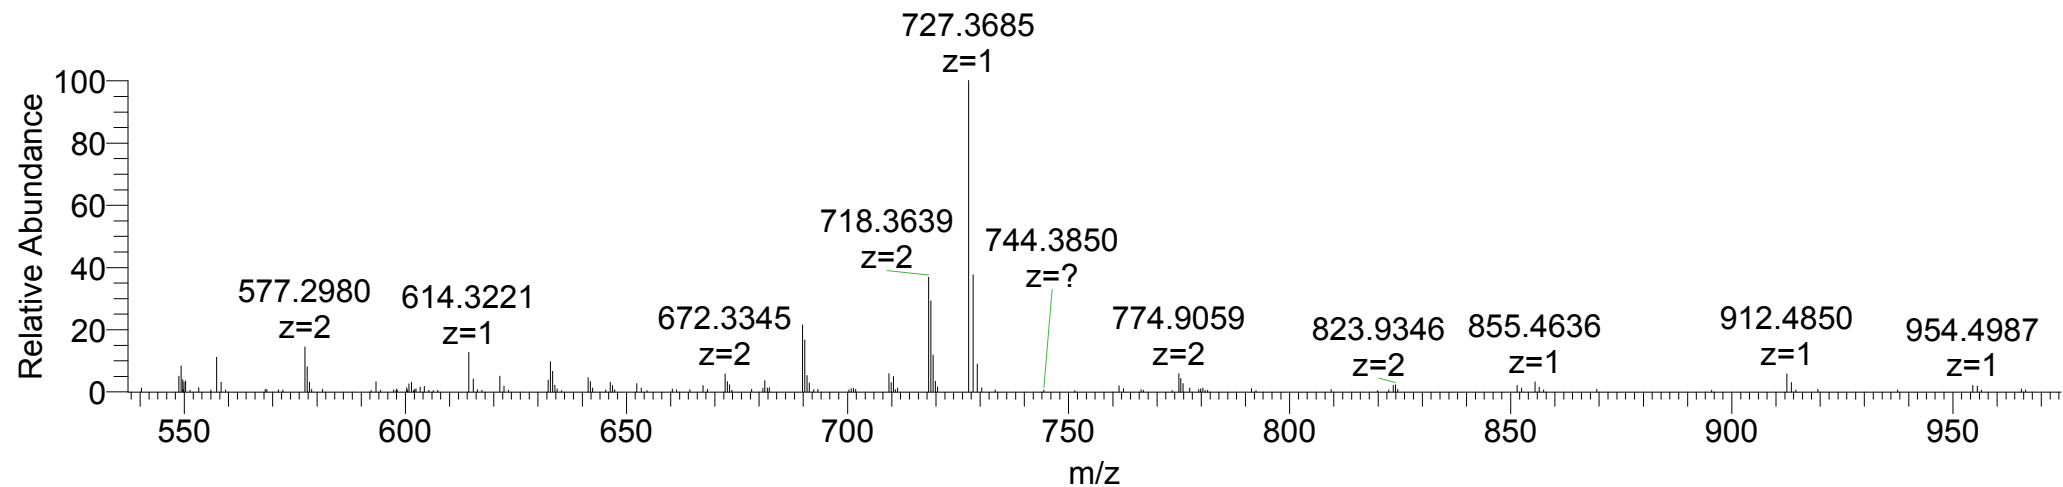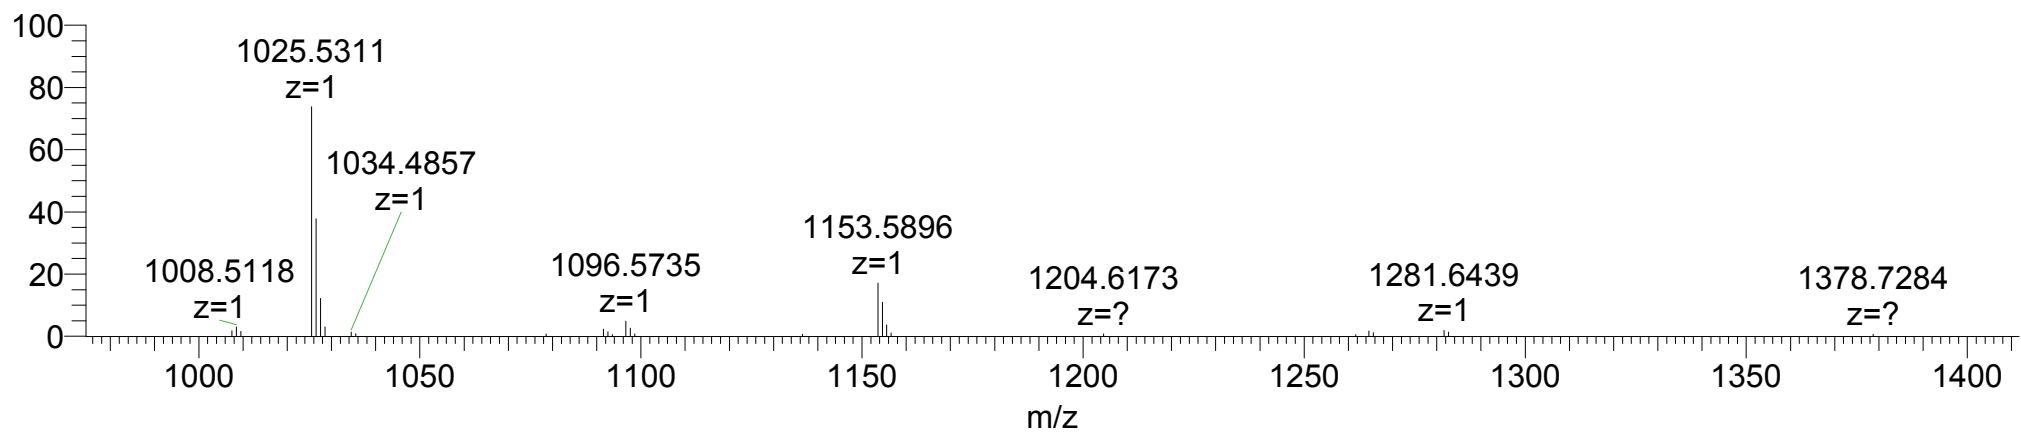

Human

**55.**

**P1452-OH, P1470-OH, K1473-OH**

#1441-1473: GIPGPVGEQGLPGSPGPDGPPGPMGPPGLPGLK

| Ion        | charge state | Theoretical m/z (mono) | Experimental m/z (mono) | Mass error (Da) | Mass error (PPM) |
|------------|--------------|------------------------|-------------------------|-----------------|------------------|
| [M+3H]+4OH | 3            | 1016.5096              | 1016.5016               | -0.0240         | -7.9             |
| y4+2OH     | 1            | 446.2609               | 446.2574                | -0.0035         | -7.9             |
| b6+OH      | 1            | 537.3031               | 537.2996                | -0.0035         | -6.5             |
| y14+2OH    | 2            | 673.8605               | 673.8560                | -0.0090         | -6.7             |
| y15+2OH    | 2            | 702.3712               | 702.3687                | -0.0050         | -3.6             |
| y8+2OH     | 1            | 810.4720               | 810.4657                | -0.0063         | -7.8             |
| b9+OH      | 1            | 851.4258               | 851.4200                | -0.0058         | -6.8             |
| y19+2OH    | 2            | 885.4482               | 885.4412                | -0.0140         | -7.9             |
| y22+3OH    | 2            | 1013.9988              | 1013.9922               | -0.0132         | -6.5             |
| b11+OH     | 1            | 1021.5313              | 1021.5255               | -0.0058         | -5.7             |
| y11+2OH    | 1            | 1095.5867              | 1095.5841               | -0.0026         | -2.4             |
| y13+2OH    | 1            | 1249.6609              | 1249.6499               | -0.0110         | -8.8             |

**\*Unlocalized sites: P1443-OH?, P1445-OH?**

**Pseudolocalized sites: P1443-OH**

12\_9\_2011Col5a1\_Trypsin\_CE30 #5401 RT: 48.39 AV: 1 NL: 2.09E4

T: FTMS + c NSI d Full ms2 1017.17@hcd30.00 [100.00-2000.00]

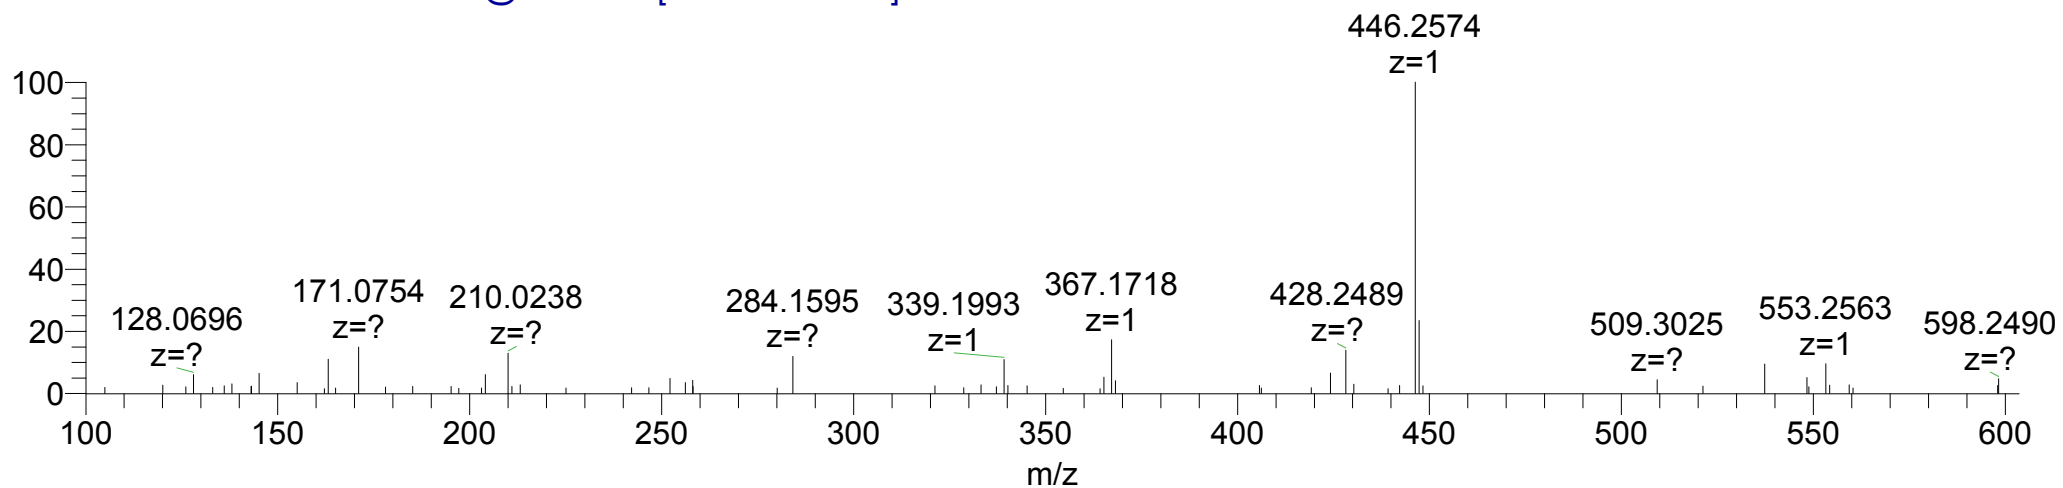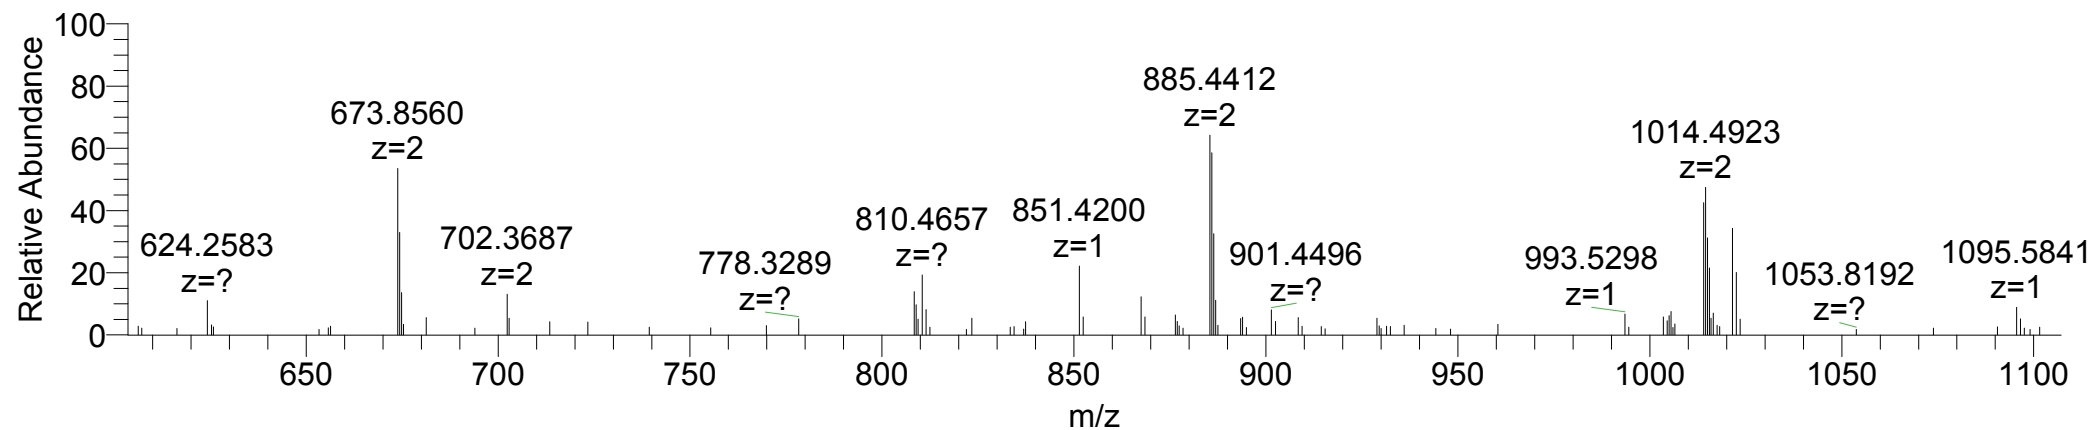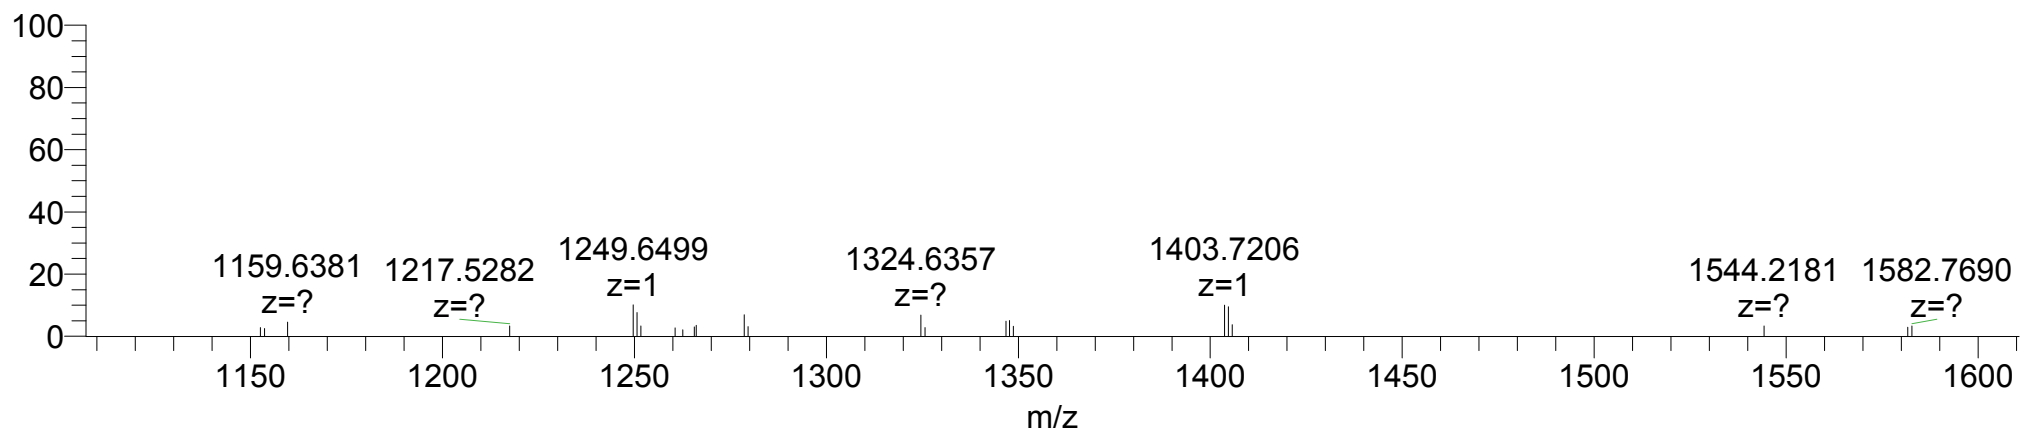

Human

56.

**K1482-OH, P1485-OH, P1494-OH**

#1482-1499: KGHPGLIGLIGLIGPPGEQGE

| Ion            | charge state | Theoretical m/z (mono) | Experimental m/z (mono) | Mass error (Da) | Mass error (PPM) |
|----------------|--------------|------------------------|-------------------------|-----------------|------------------|
| [M+3H]+3OH     | 3            | 601.9794               | 601.9736                | -0.0174         | -9.7             |
| y1             | 1            | 148.0604               | 148.0592                | -0.0012         | -8.2             |
| GE/y2-H2O      | 1            | 187.0713               | 187.0698                | -0.0015         | -8.1             |
| y2             | 1            | 205.0819               | 205.0801                | -0.0018         | -8.8             |
| y3-H2O/GEQ/EQG | 1            | 315.1299               | 315.1273                | -0.0026         | -8.3             |
| b9+2OH         | 2            | 453.2638               | 453.2600                | -0.0076         | -8.4             |
| b10+2OH        | 2            | 509.8058               | 509.8012                | -0.0092         | -9.0             |
| b11+2OH        | 2            | 538.3166               | 538.3123                | -0.0086         | -8.0             |
| b12+2OH        | 2            | 586.8429               | 586.8370                | -0.0118         | -10.1            |
| y6+OH          | 1            | 632.2522               | 632.2441                | -0.0081         | -12.8            |
| b14+3OH        | 2            | 671.8775               | 671.8700                | -0.0150         | -11.2            |
| y7+OH          | 1            | 729.2960               | 729.2960                | 0.0000          | 0.0              |
| b15+3OH        | 2            | 736.3988               | 736.3949                | -0.0078         | -5.3             |
| y8+OH          | 1            | 786.3264               | 786.3234                | -0.0030         | -3.8             |
| b8+2OH         | 1            | 792.4363               | 792.4260                | -0.0103         | -13.0            |
| b17+3OH        | 2            | 828.9388               | 828.9341                | -0.0094         | -5.7             |
| b9+2OH         | 1            | 905.5203               | 905.5134                | -0.0069         | -7.6             |
| b10+2OH        | 1            | 1018.6044              | 1018.5941               | -0.0103         | -10.1            |
| b11+2OH        | 1            | 1075.6259              | 1075.6165               | -0.0094         | -8.7             |

12\_9\_2011Col5a1\_AspNGluC\_2 #4067 RT: 36.04 AV: 1 NL: 1.98E4

T: FTMS + c NSI d Full ms2 602.31@hcd30.00 [100.00-1820.00]

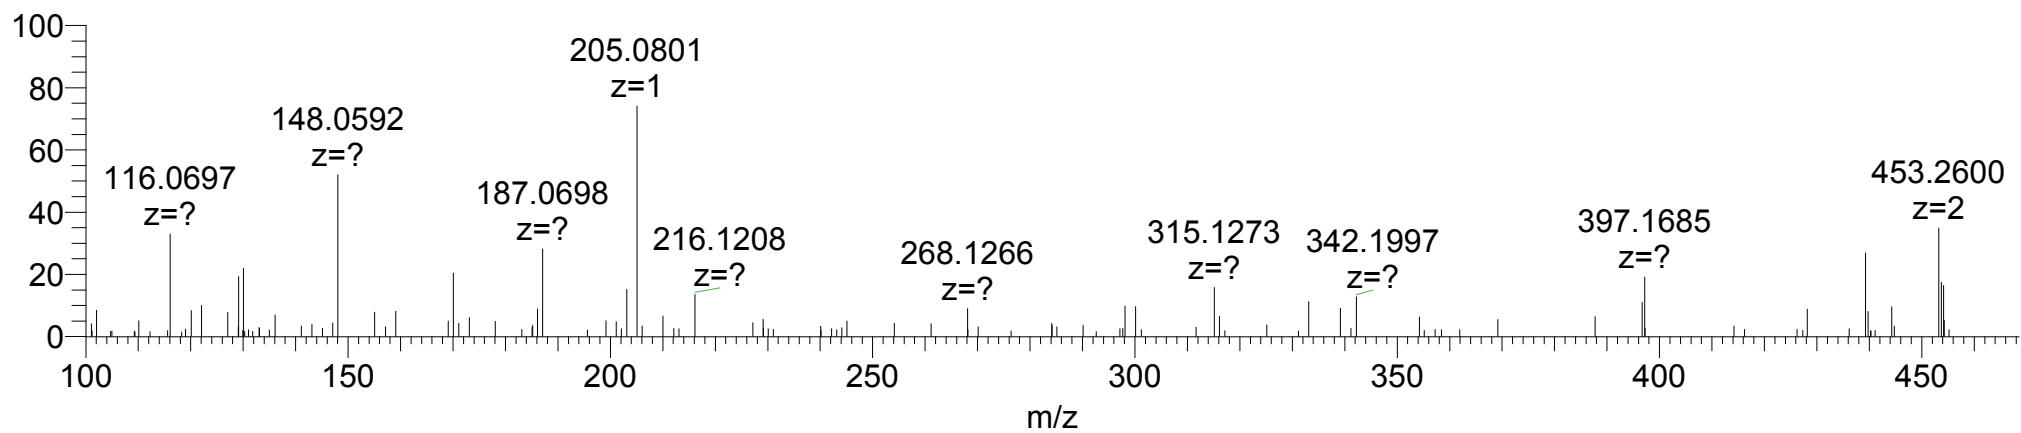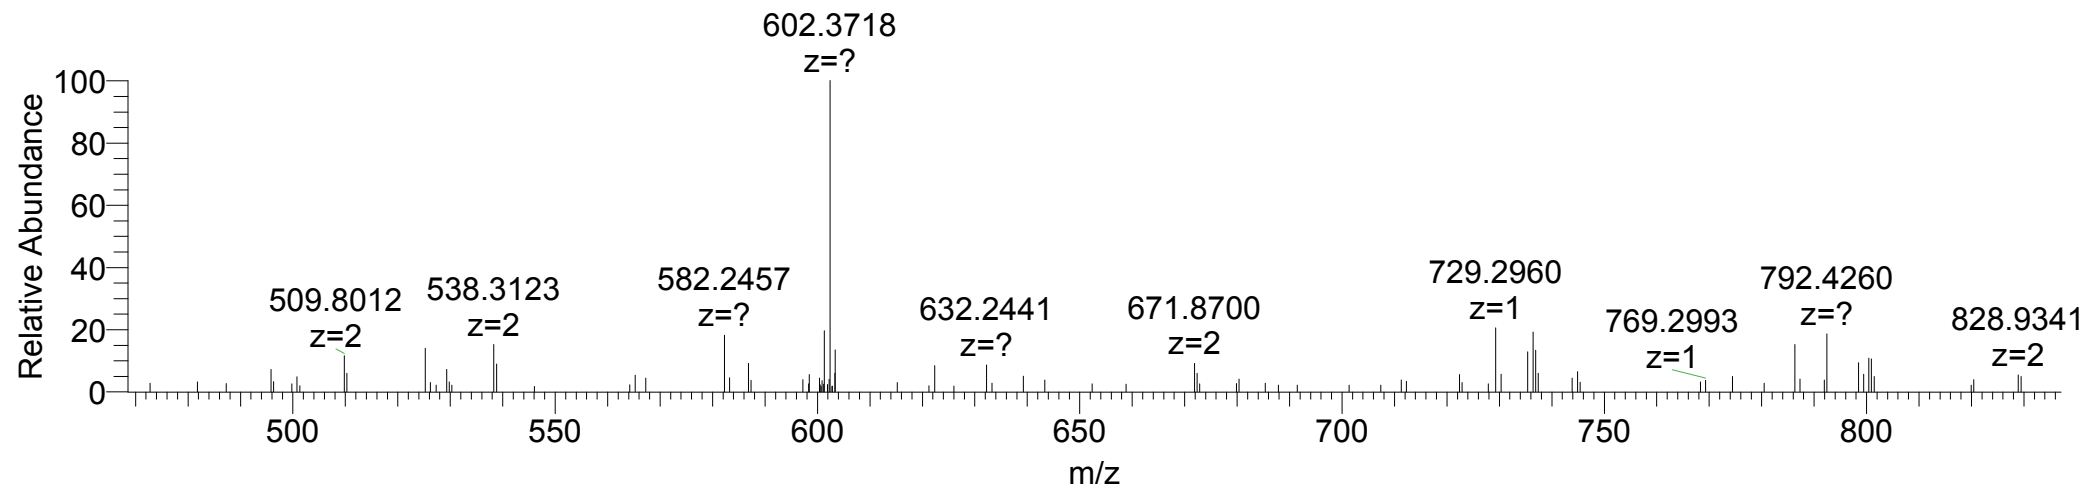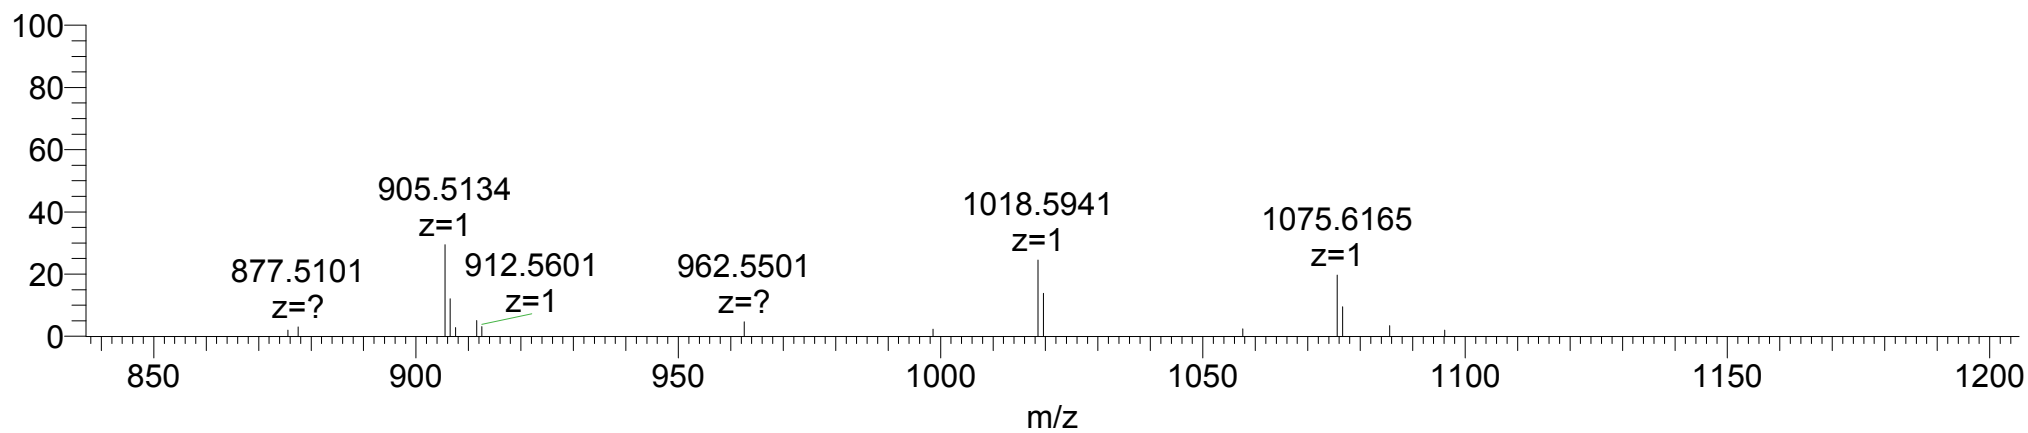



Human

57.

P1485-OH, P1494-OH, K1500-OH.Gal.Glc

#1483-1503: GHPGLIGLIGPPGEQGEKGDGR

| Ion                | charge state | Theoretical m/z (mono) | Experimental m/z (mono) | Mass error (Da) | Mass error (PPM) |
|--------------------|--------------|------------------------|-------------------------|-----------------|------------------|
| [M+4H]+3OH+Gal.Glc | 4            | 614.8001               | 614.7947                | -0.0216         | -8.8             |
| GP-28              | 1            | 127.0866               | 127.0855                | -0.0011         | -8.7             |
| GP                 | 1            | 155.0815               | 155.0802                | -0.0013         | -8.4             |
| b7+OH              | 2            | 324.6768               | 324.6741                | -0.0054         | -8.3             |
| a8+OH              | 2            | 367.2214               | 367.2182                | -0.0064         | -8.7             |
| b8+OH              | 2            | 381.2189               | 381.2153                | -0.0072         | -9.5             |
| y11+2OH            | 3            | 401.1863               | 401.1828                | -0.0105         | -8.7             |
| y10+2OH            | 2            | 552.7494               | 552.7446                | -0.0096         | -8.7             |
| y11+2OH            | 2            | 601.2758               | 601.2703                | -0.0110         | -9.2             |
| y12+2OH            | 2            | 629.7866               | 629.7805                | -0.0122         | -9.7             |
| b7+OH              | 1            | 648.3464               | 648.3403                | -0.0061         | -9.4             |
| y13+2OH            | 2            | 686.3286               | 686.3229                | -0.0114         | -8.3             |
| a8+OH              | 1            | 733.4355               | 733.4318                | -0.0037         | -5.1             |
| b8+OH              | 1            | 761.4304               | 761.4232                | -0.0072         | -9.5             |
| y12+2OH+Gal.Glc    | 2            | 791.8394               | 791.8303                | -0.0182         | -11.5            |
| b9+OH              | 1            | 874.5145               | 874.5068                | -0.0077         | -8.8             |
| y10+2OH            | 1            | 1104.4916              | 1104.4805               | -0.0111         | -10.1            |
| y11+2OH            | 1            | 1201.5444              | 1201.5370               | -0.0074         | -6.2             |
| y12+2OH            | 1            | 1258.5658              | 1258.5587               | -0.0071         | -5.6             |

12\_9\_2011Col5a1\_Trypsin\_CE30 #3027 RT: 28.03 AV: 1 NL: 4.70E4

T: FTMS + c NSI d Full ms2 615.05@hcd30.00 [100.00-2000.00]

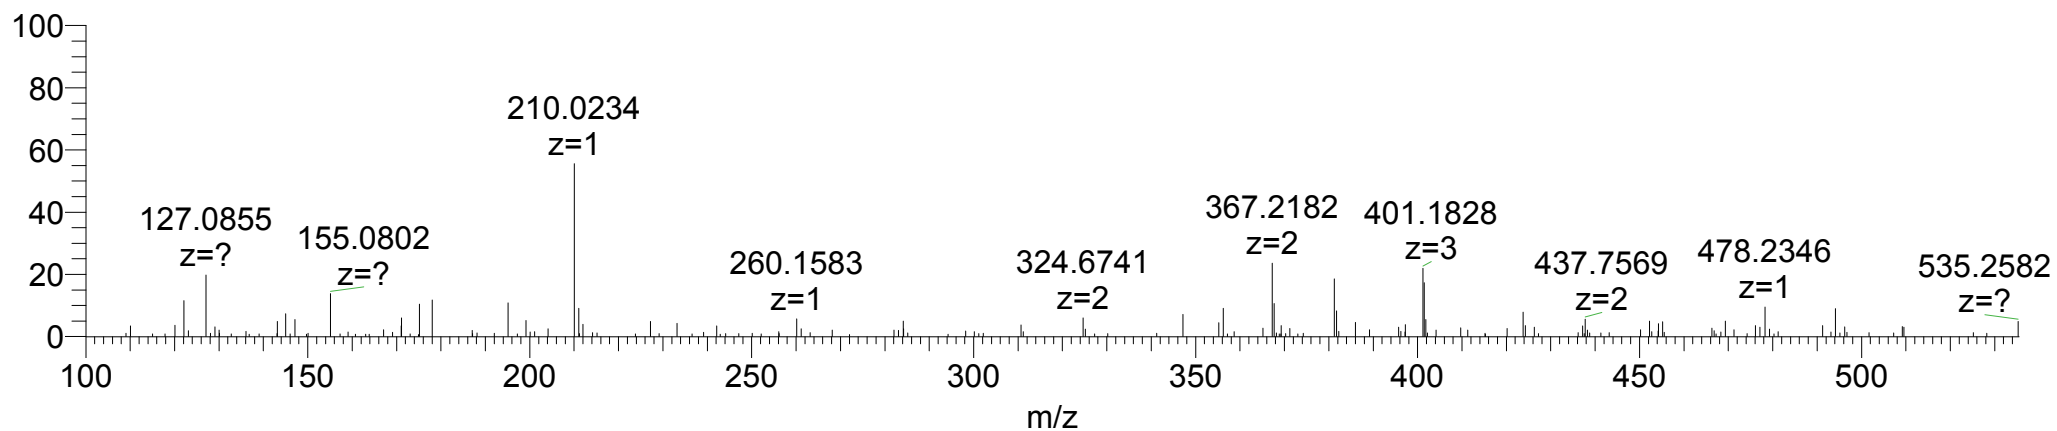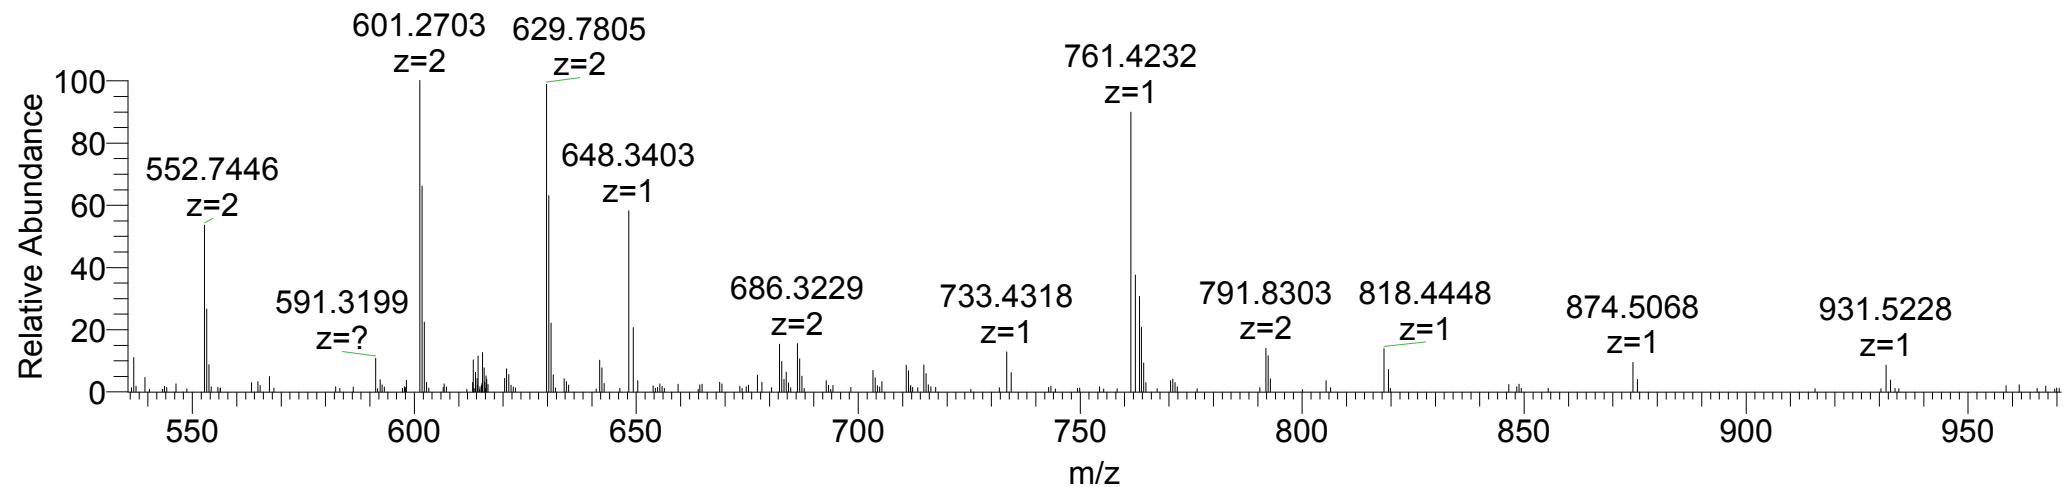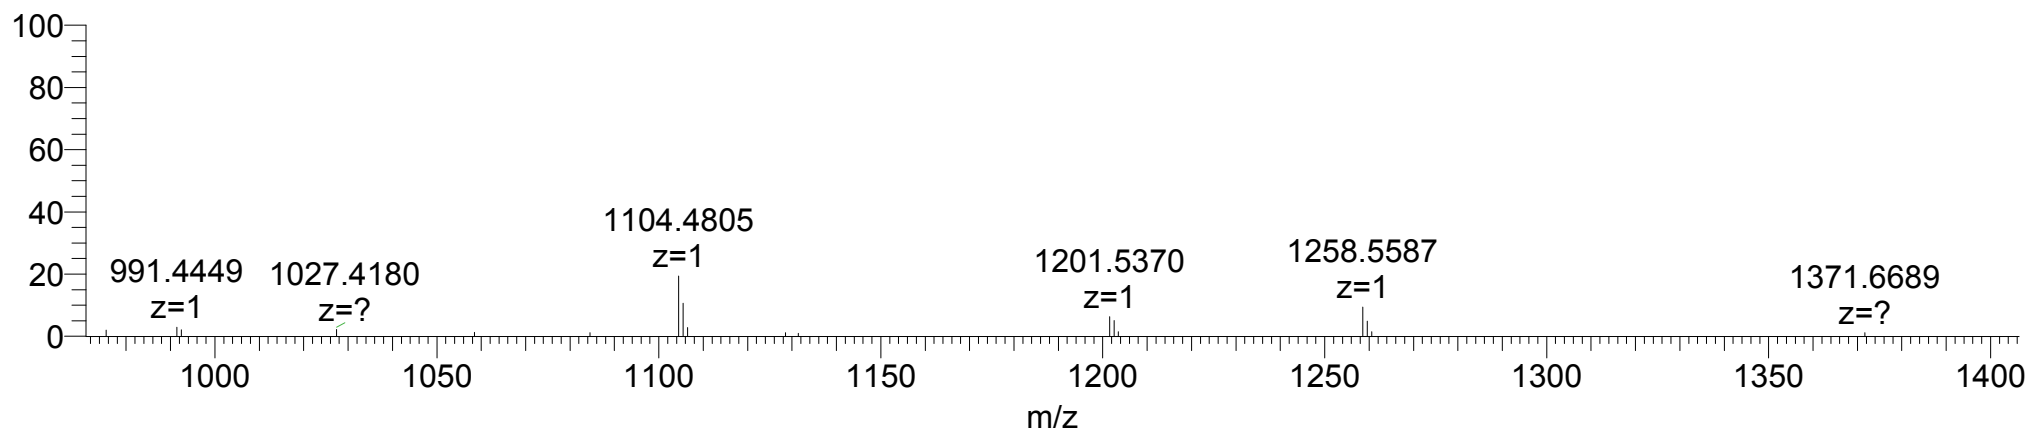

Human

**58.**

**P1506-OH**

#1504-1515: GLPGPQGSSGPK

| Ion        | charge state | Theoretical m/z (mono) | Experimental m/z (mono) | Mass error (Da) | Mass error (PPM) |
|------------|--------------|------------------------|-------------------------|-----------------|------------------|
| [M+2H]+2OH | 2            | 557.2804               | 557.2748                | -0.0112         | -10.1            |
| y3+OH      | 1            | 317.1819               | 317.1792                | -0.0027         | -8.5             |
| y4-NH3     | 1            | 387.1874               | 387.1900                | 0.0026          | 6.7              |
| y9+OH      | 2            | 415.7038               | 415.7006                | -0.0064         | -7.7             |
| y10+2OH    | 2            | 472.2276               | 472.2239                | -0.0074         | -7.9             |
| y8+OH      | 1            | 773.3788               | 773.3720                | -0.0068         | -8.8             |
| y9+OH      | 1            | 830.4003               | 830.3934                | -0.0069         | -8.3             |
| y10+2OH    | 1            | 943.4480               | 943.4405                | -0.0075         | -8.0             |

**\*Unlocalized sites: P1514-OH?, K1515-OH?**

**Pseudolocalized sites: K1515-OH**

12\_9\_2011Col5a1\_Trypsin\_CE30 #1171 RT: 12.37 AV: 1 NL: 2.70E5

T: FTMS + c NSI d Full ms2 557.27@hcd30.00 [100.00-1125.00]

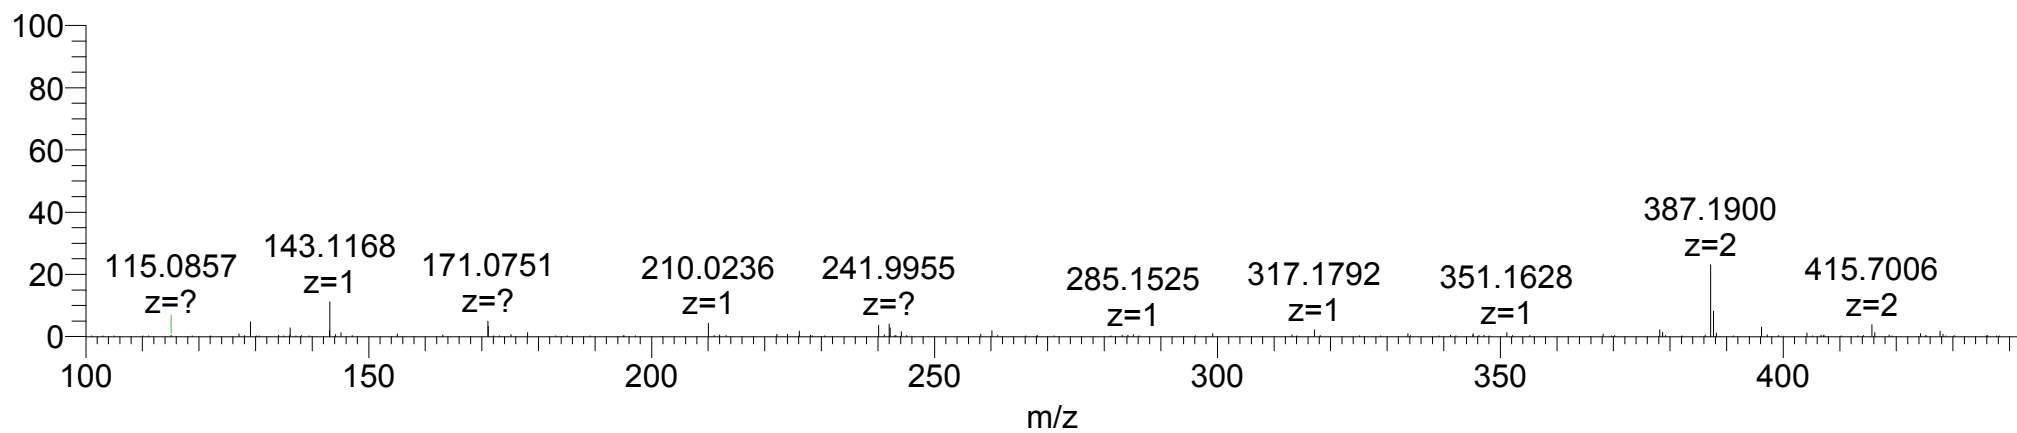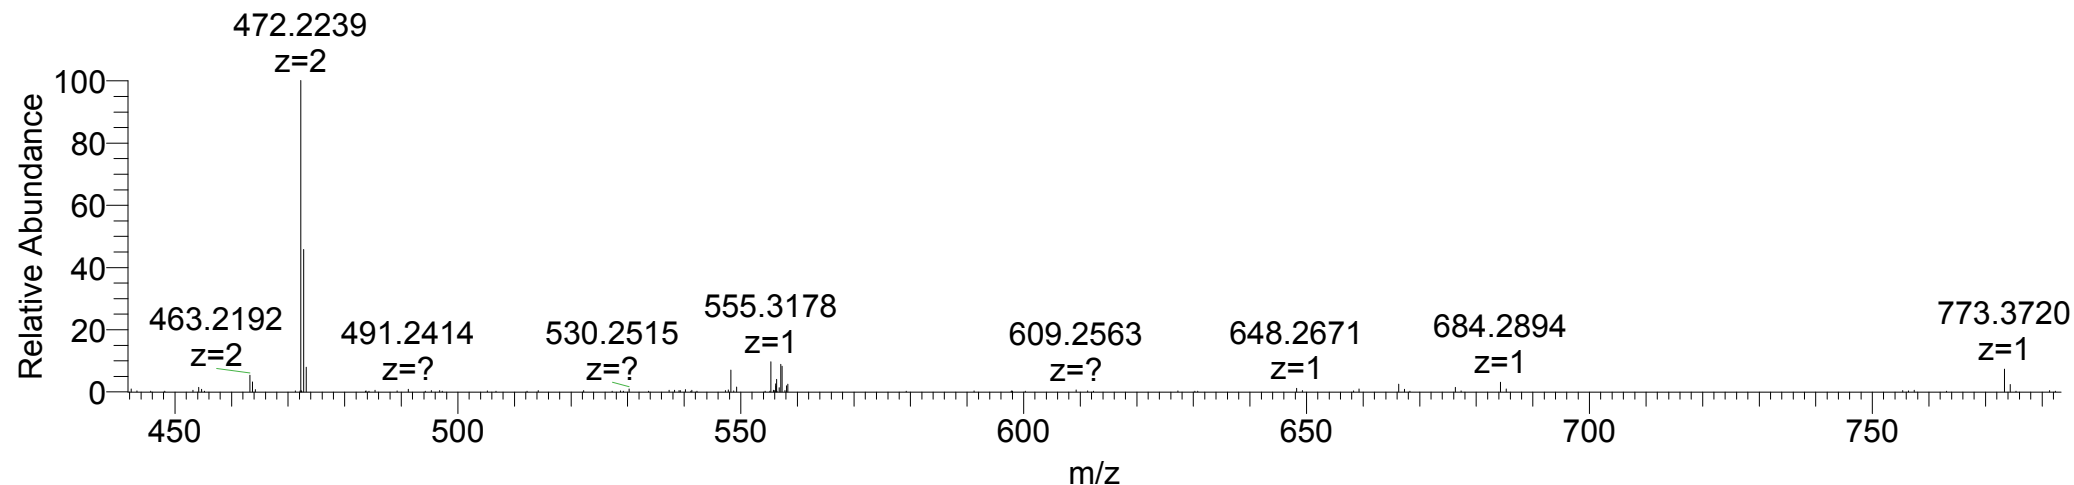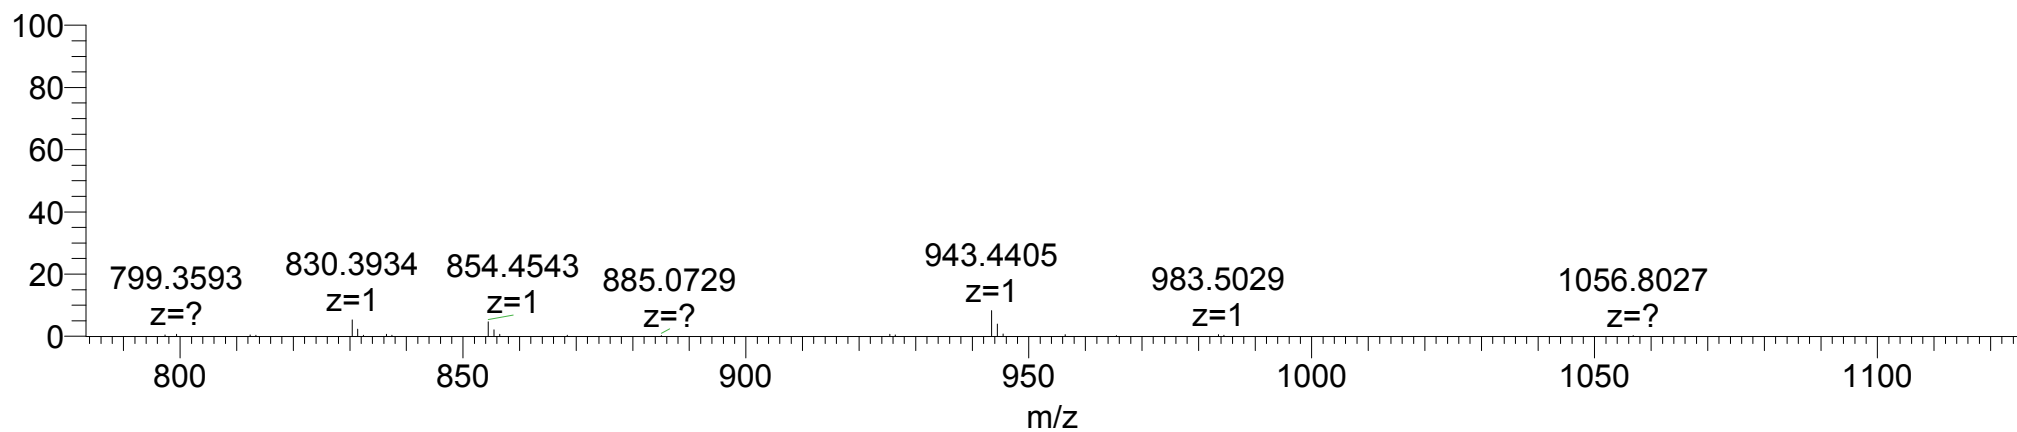

Human

59.

**K1554-OH.Gal**

#1546-1582: GSSGPTGPKGEAGHPGPPGPPGPPGEVIQPLPIQASR

| Ion               | charge state | Theoretical m/z (mono) | Experimental m/z (mono) | Mass error (Da) | Mass error (PPM) |
|-------------------|--------------|------------------------|-------------------------|-----------------|------------------|
| [M+4H]+4OH+Gal    | 4            | 926.7104               | 926.7028                | -0.0304         | -8.2             |
| PI-28/PL-28/LP-28 | 1            | 183.1492               | 183.1476                | -0.0016         | -8.8             |
| IQ/PK+OH          | 1            | 242.1499               | 242.1478                | -0.0021         | -8.7             |
| PGE               | 1            | 284.1241               | 284.1216                | -0.0025         | -8.8             |
| y6                | 2            | 336.1954               | 336.1925                | -0.0058         | -8.7             |
| PPGE/PGPP+2OH     | 1            | 381.1769               | 381.1732                | -0.0037         | -9.7             |
| y8                | 2            | 441.2638               | 441.2599                | -0.0078         | -8.9             |
| y4                | 1            | 461.2467               | 461.2428                | -0.0039         | -8.5             |
| y9-H2O            | 2            | 496.2878               | 496.2831                | -0.0094         | -9.5             |
| y10-H2O-NH3       | 2            | 544.3166               | 544.3124                | -0.0084         | -7.7             |
| y6                | 1            | 671.3835               | 671.3778                | -0.0057         | -8.5             |
| b26+4OH+Gal       | 3            | 828.3701               | 828.3644                | -0.0171         | -6.9             |
| y8                | 1            | 881.5203               | 881.5114                | -0.0089         | -10.1            |
| y9                | 1            | 1009.5789              | 1009.5717               | -0.0072         | -7.1             |
| b22+4OH+Gal       | 2            | 1051.9677              | 1051.9567               | -0.0220         | -10.5            |
| b23+4OH+Gal       | 2            | 1100.4931              | 1100.4871               | -0.0120         | -5.5             |
| b26+4OH           | 2            | 1161.0251              | 1161.0183               | -0.0136         | -5.9             |
| b27+4OH           | 2            | 1210.5593              | 1210.5513               | -0.0160         | -6.6             |
| b26+4OH+Gal       | 2            | 1242.0515              | 1242.0410               | -0.0210         | -8.5             |
| b27+4OH+Gal       | 2            | 1291.5857              | 1291.5769               | -0.0176         | -6.8             |
| b28+4OH+Gal       | 2            | 1348.1277              | 1348.1147               | -0.0260         | -9.7             |

\*Unlocalized sites: P1550-OH?, P1553-OH?, P1560-OH?, P1562-OH?, P1563-OH?, P1565-OH?, P1566-OH?

Pseudolocalized sites: P1560-OH, P1562-OH, P1566-OH

12\_9\_2011Col5a1\_Trypsin\_CE30 #3564 RT: 32.62 AV: 1 NL: 1.23E5

T: FTMS + c NSI d Full ms2 927.20@hcd30.00 [100.00-2000.00]

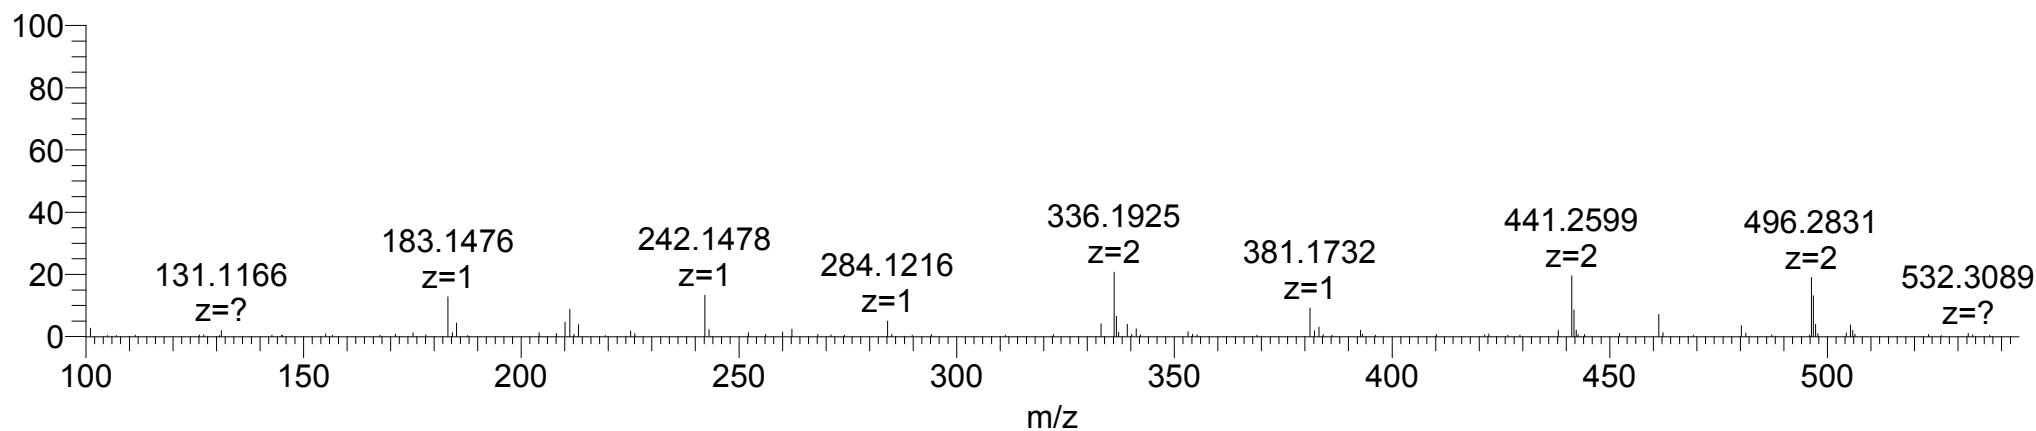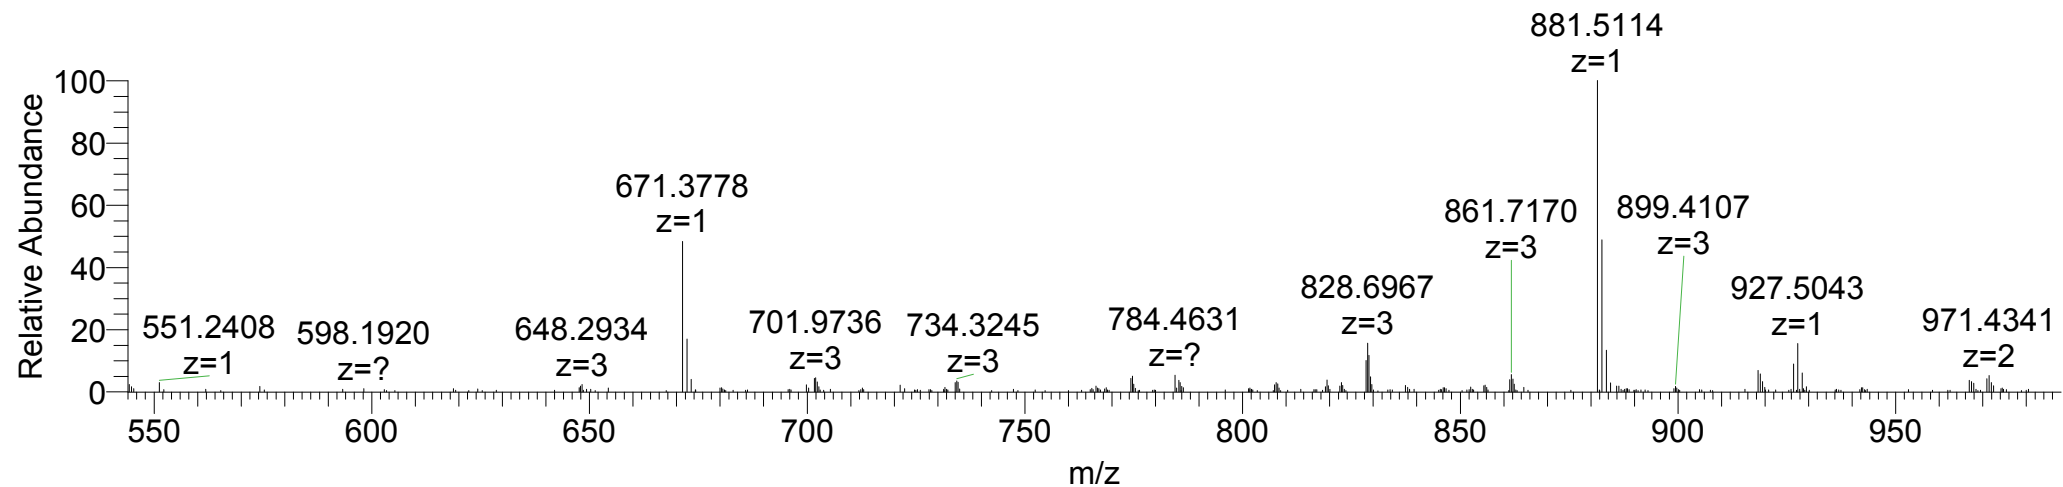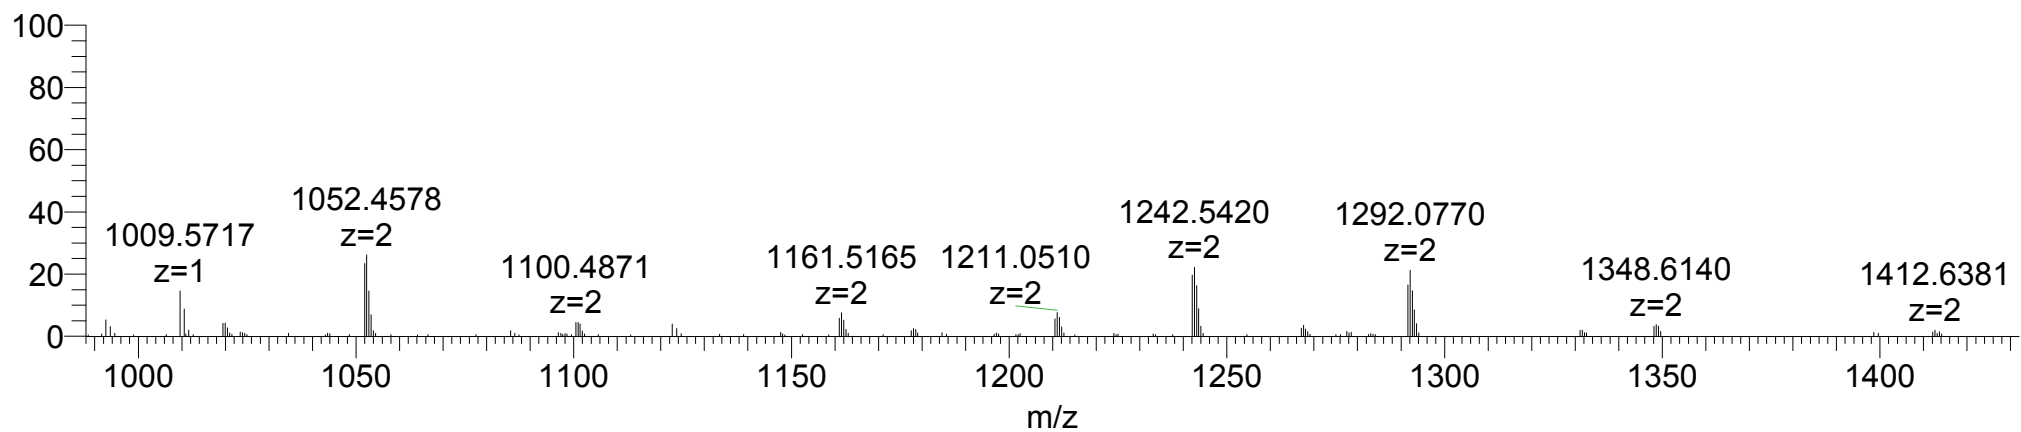

Human

60.

P1560-OH, P1563-OH, P1566-OH, P1569-OH

#1557-1571: AGHPGPPGPPGPPGE

| Ion        | charge state | Theoretical m/z (mono) | Experimental m/z (mono) | Mass error (Da) | Mass error (PPM) |
|------------|--------------|------------------------|-------------------------|-----------------|------------------|
| [M+2H]+4OH | 2            | 692.8100               | 692.8033                | -0.0134         | -9.7             |
| b3         | 1            | 266.1248               | 266.1228                | -0.0020         | -7.5             |
| y3+OH      | 1            | 318.1296               | 318.1272                | -0.0024         | -7.6             |
| b9+2OH     | 2            | 400.6879               | 400.6841                | -0.0076         | -9.5             |
| y4+OH      | 1            | 415.1823               | 415.1789                | -0.0034         | -8.2             |
| b11+3OH    | 2            | 485.7225               | 485.7188                | -0.0074         | -7.6             |
| b12+3OH    | 2            | 534.2489               | 534.2441                | -0.0096         | -9.0             |
| y6+2OH     | 1            | 585.2515               | 585.2465                | -0.0050         | -8.6             |
| b14+4OH    | 2            | 619.2835               | 619.2796                | -0.0078         | -6.3             |
| y7+2OH     | 1            | 682.3042               | 682.2980                | -0.0062         | -9.1             |
| b8+2OH     | 1            | 703.3158               | 703.3094                | -0.0064         | -9.1             |
| y8+2OH     | 1            | 739.3257               | 739.3168                | -0.0089         | -12.1            |
| b9+2OH     | 1            | 800.3686               | 800.3616                | -0.0070         | -8.8             |
| y9+3OH     | 1            | 852.3734               | 852.3616                | -0.0118         | -13.9            |
| b10+3OH    | 1            | 913.4163               | 913.4089                | -0.0074         | -8.1             |
| y10+3OH    | 1            | 949.4262               | 949.4210                | -0.0052         | -5.5             |
| b11+3OH    | 1            | 970.4377               | 970.4299                | -0.0078         | -8.0             |
| b12+3OH    | 1            | 1067.4905              | 1067.4817               | -0.0088         | -8.3             |
| y12+4OH    | 1            | 1119.4953              | 1119.4893               | -0.0060         | -5.4             |

12\_9\_2011Col5a1\_AspNGluC\_2 #1327 RT: 13.05 AV: 1 NL: 3.31E4

T: FTMS + c NSI d Full ms2 692.80@hcd30.00 [100.00-1400.00]

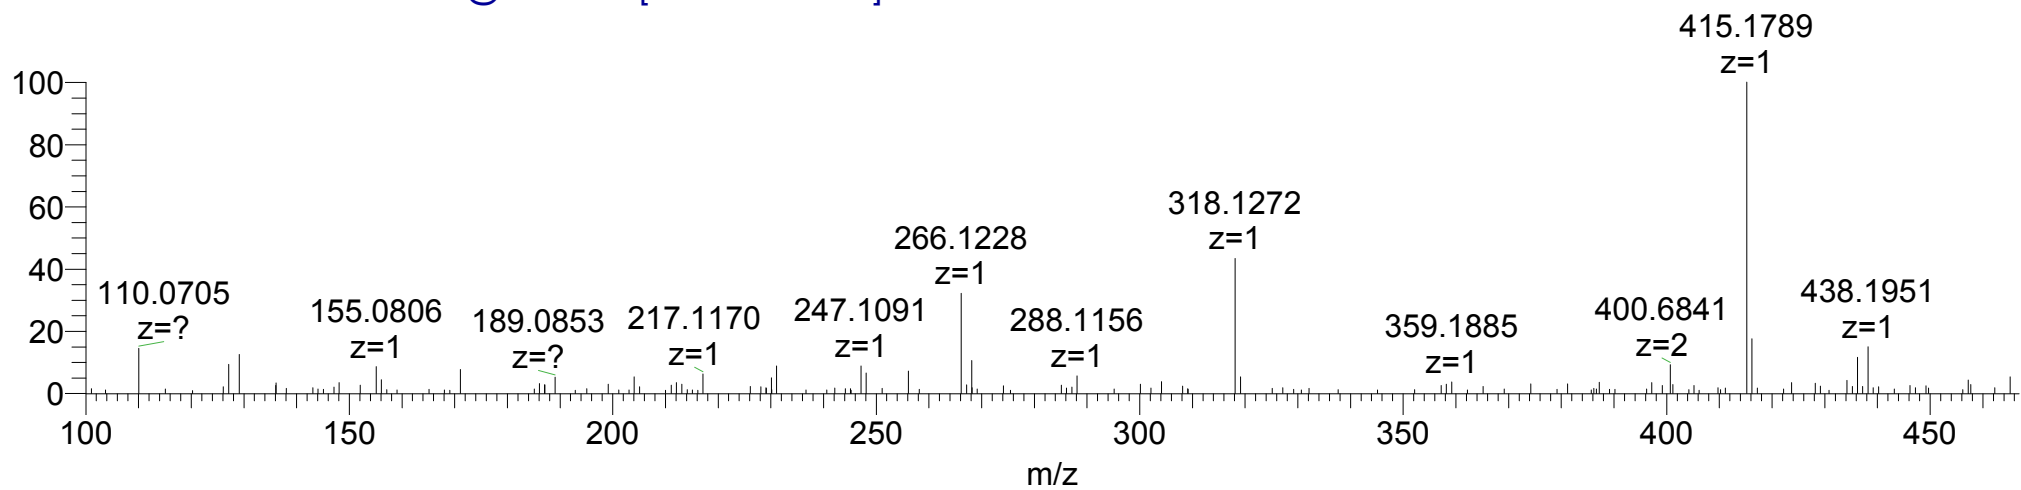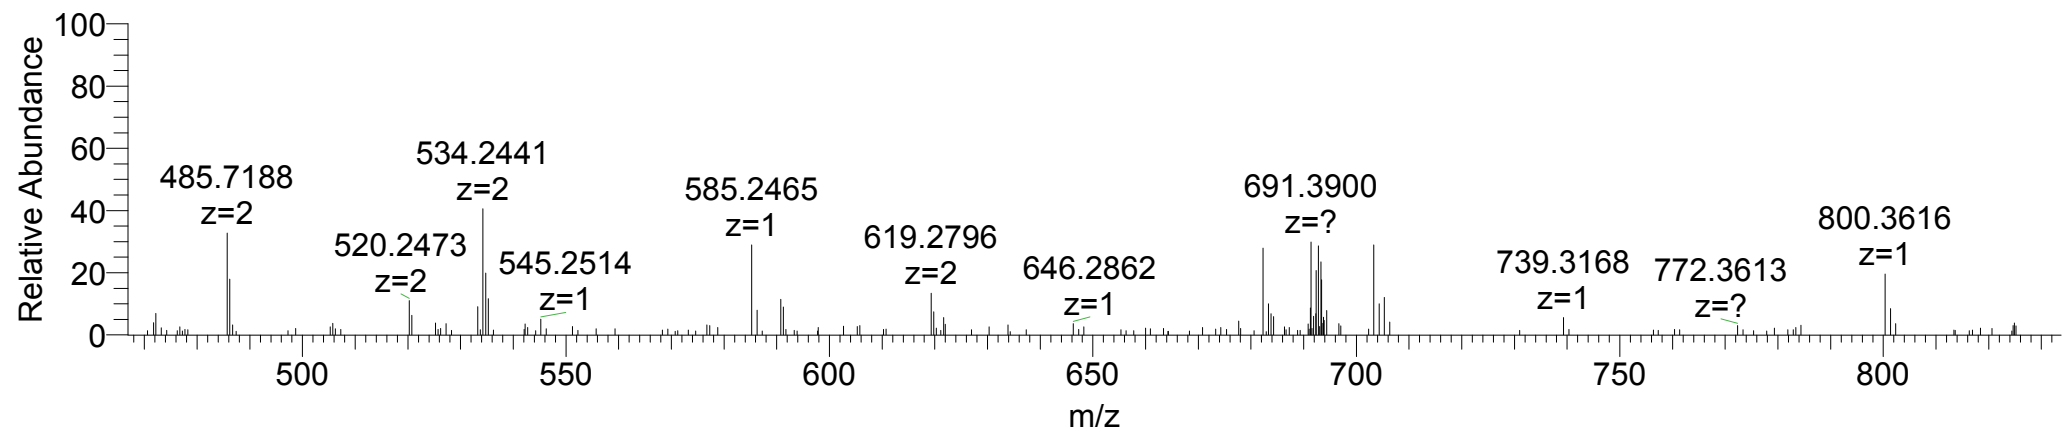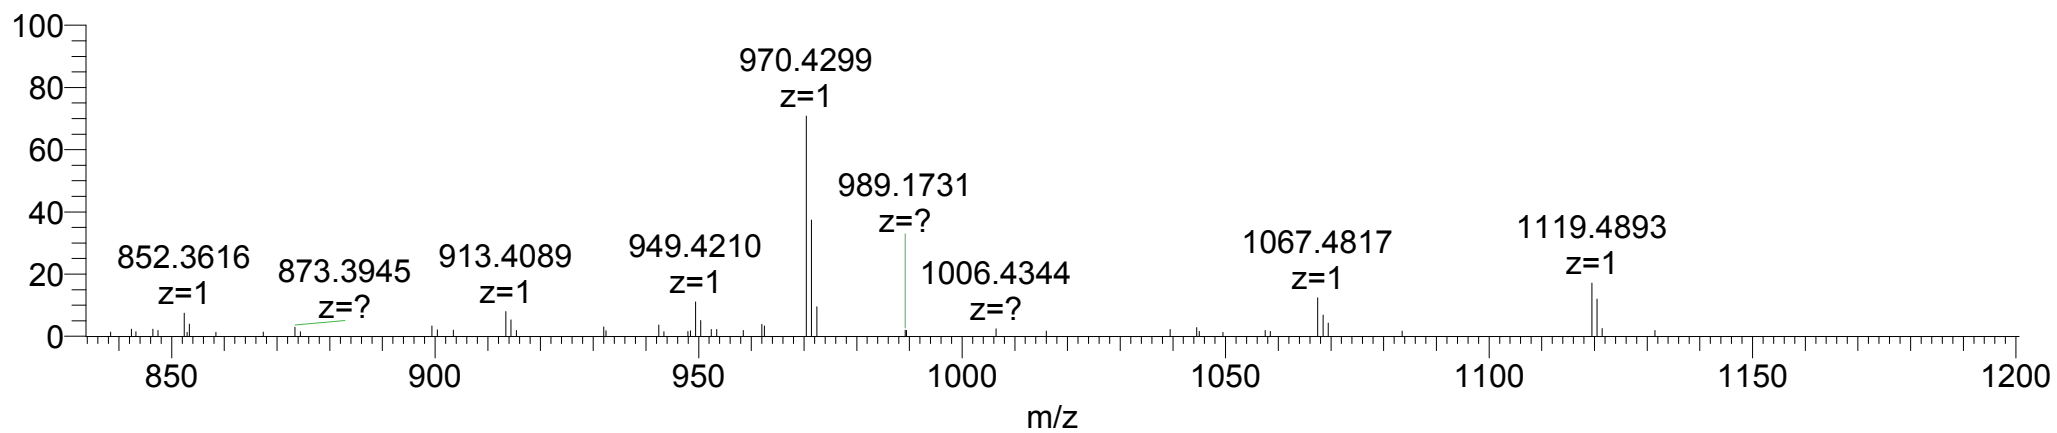

Supplement: supp_M112.406850_jbc.M112.406850-5.pdf [file supp_M112.406850_jbc.M112.406850-5.pdf]
