# Supplementary material
Source: PubMed Central journal article supplement (PMC3504773)
Supplement: supp_M112.406850_jbc.M112.406850-2.pdf [file supp_M112.406850_jbc.M112.406850-2.pdf]

Supplemental Table S1

## Notes:

P-OH = hydroxyproline  
 m = oxidation of M  
 K-OH.Gal.Glc = galactose,glucose on hydroxylysine  
 All product ions: ppm<10, S/N>=3

| Spectrum # | start | end  | sequence                          | total PTMs   | localized sites                                                       | unlocalized sites                                              | pseudolocalized                                       |
|------------|-------|------|-----------------------------------|--------------|-----------------------------------------------------------------------|----------------------------------------------------------------|-------------------------------------------------------|
| 1          | 1     | 36   | GPAGPMGLTGRPGMPPGSSGLKGEKEDMGPQGR | 4OH+Gal.Glc  | K24-OH.Gal.Glc, P27-OH                                                | P18-OH?, P12-OH?, P14-OH?, m15?, P17-OH?                       | P12-OH, P18-OH (Gly-X-Hyp motif)                      |
| 2          | 9     | 23   | TGRPGMGPSSGGL                     | 3OH          | P12-OH, P17-OH, P18-OH                                                |                                                                |                                                       |
| 3          | 37    | 50   | GVQPPGPAKPGPR                     | 3OH          | P41-OH, P42-OH, P48-OH                                                |                                                                |                                                       |
| 4          | 61    | 72   | GMPGQTGPKGDR                      | 2OH+Gal.Glc  | P63-OH, K69-OH.Gal.Glc                                                |                                                                |                                                       |
| 5          | 73    | 87   | GFDGLAGLPGEKGR                    | 2OH+Gal.Glc  | P81-OH, K84-OH.Gal.Glc                                                |                                                                |                                                       |
| 6          | 88    | 105  | GDPGSPGPPGPPGEDGER                | 5OH          | P90-OH, P95-OH, P96-OH, P98-OH, P99-OH                                |                                                                |                                                       |
| 7          | 115   | 123  | GLPGEPPGR                         | 2OH          | P117-OH, P120-OH                                                      |                                                                |                                                       |
| 8          | 130   | 150  | GPPGPPGPPVGTMDGQPGPK              | 5OH          | P132-OH, P135-OH, P137-OH, P138-OH, P147-OH                           |                                                                |                                                       |
| 9          | 151   | 186  | GNVGPQGEPPGPPGQGNPQAQGLPQGAIGPPGK | 5OH          | P159-OH, P162-OH, P168-OH, P174-OH                                    | P183-OH?, P182-OH?, K186-OH?                                   | P183-OH or K186-OH (Gly-X-Hyp motif or Hyl)           |
| 10         | 151   | 186  | GNVGPQGEPPGPPGQGNPQAQGLPQGAIGPPGK | 5OH          | P168-OH, P174-OH, P183-OH                                             | P159-OH?, P161-OH?, P162-OH?                                   | P159-OH, P162-OH (Gly-X-Hyp motif)                    |
| 11         | 186   | 200  | KGPLGKPLGMPGA                     | 4OH          | K186-OH, P192-OH, P198-OH                                             | P195-OH?, m198?                                                |                                                       |
| 12         | 187   | 209  | GPLGKPLGMPGADGPPGHPGK             | 4OH          | P195-OH, P198-OH, P204-OH                                             | P207-OH?, K209-OH?                                             | P207-OH (Gly-X-Hyp motif)                             |
| 13         | 187   | 209  | GPLGKPLGMPGADGPPGHPGK             | 3OH          | P198-OH, P204-OH, P207-OH                                             |                                                                |                                                       |
| 14         | 210   | 234  | EGPPEKGGQPPGQPIGYPGPR             | 5OH+Gal.Glc  | P213-OH, K216-OH.Gal.Glc, P221-OH, P222-OH                            | P231-OH?, P233-OH?                                             | P231-OH (Gly-X-Hyp motif)                             |
| 15         | 210   | 234  | EGPPEKGGQPPGQPIGYPGPR             | 4OH+Gal.Glc  | P213-OH, K216-OH.Gal.Glc, P222-OH, P231-OH                            |                                                                |                                                       |
| 16         | 235   | 243  | GVKGAODIR                         | OH+Gal.Glc   | K237-OH.Gal.Glc                                                       |                                                                |                                                       |
| 17         | 240   | 254  | DGIRGLKGTKEKGE                    | 3OH+3Gal.Glc | K246-OH.Gal.Glc, K249-OH.Gal.Glc, K252-OH.Gal.Glc                     |                                                                |                                                       |
| 18         | 253   | 270  | GEDGPPGFKDGMGIKGR                 | 3OH+2Gal.Glc | P258-OH, K261-OH.Gal.Glc, K267-OH.Gal.Glc                             |                                                                |                                                       |
| 19         | 271   | 279  | GEIGPPGR                          | 2OH          | P275-OH, P276-OH                                                      |                                                                |                                                       |
| 20         | 280   | 290  | GEDGPEGPKGR                       | OH+Gal.Glc   | K288-OH.Gal.Glc                                                       |                                                                |                                                       |
| 21         | 291   | 308  | GGNPDGGLGPPGKGGK                  | 3OH+Gal.Glc  | P297-OH, P303-OH, K306-OH.Gal.Glc                                     |                                                                |                                                       |
| 22         | 309   | 320  | LGVPLGPPYGR                       | 2OH          | P312-OH, P315-OH, P318-OH                                             |                                                                |                                                       |
| 23         | 321   | 342  | QPKSGIGPFGFANGKGGRR               | 4OH+Gal.Glc  | K324-OH.Gal.Glc, P330-OH, P333-OH, K339-OH.Gal.Glc                    |                                                                |                                                       |
| 24         | 343   | 351  | GTPGKPPGR                         | 2OH          | P345-OH, P348-OH                                                      |                                                                |                                                       |
| 25         | 367   | 390  | GITKPKPGKNSGGDPAGPPGER            | 4OH+Gal.Glc  | P372-OH, K375-OH.Gal.Glc, P386-OH, P387-OH                            |                                                                |                                                       |
| 26         | 391   | 405  | GNPGPQGTGFPKPK                    | 2OH          | P402-OH                                                               | P404-OH?, K405-OH?                                             | K405-OH (Hyl)                                         |
| 27         | 406   | 423  | GPPGPKDGLGHPGQR                   | 6OH          | P407-OH, P408-OH, P410-OH, P411-OH, P417-OH, P420-OH                  |                                                                |                                                       |
| 28         | 432   | 456  | TGPPGPPVVGPPGQPTGETGPMGER         | 4OH          | P434-OH, P435-OH, P437-OH, P438-OH                                    |                                                                |                                                       |
| 29         | 457   | 476  | GHPGPPGPPGQGLPGLAGK               | 6OH          | P459-OH, P461-OH, P462-OH, P464-OH, P465-OH, P471-OH                  |                                                                |                                                       |
| 30         | 474   | 497  | AKKEGTGDPGPAAGLPGKDGKDPPL         | 4OH+Gal.Glc  | P483-OH, P489-OH, P495-OH                                             | K476-OH.Gal.Glc?, K480-OH.Gal.Glc?                             | K480-OH.Gal.Glc (Gly-X-Hyl.Gal.Glc motif)             |
| 31         | 477   | 491  | EGTKGDPGAPLPGK                    | 3OH+Gal.Glc  | K480-OH.Gal.Glc, P483-OH, P489-OH                                     |                                                                |                                                       |
| 32         | 498   | 515  | RGFPDRGLGPPVVALGL                 | 2OH          | P501-OH, P507-OH                                                      |                                                                |                                                       |
| 33         | 505   | 534  | GLPVPVAGLGLKGESEPPGPPGAPGSPGER    | 7OH+Gal.Glc  | K516-OH.Gal.Glc, P521-OH, P522-OH, P524-OH, P525-OH, P531-OH          | P507-OH?, P509-OH?                                             | P507-OH (Gly-X-Hyp motif)                             |
| 34         | 505   | 534  | GLPVPVAGLGLKGESEPPGPPGAPGSPGER    | 7OH+Gal.Glc  | P507-OH, P509-OH, K516-OH.Gal.Glc, P522-OH, P524-OH, P525-OH, P531-OH |                                                                |                                                       |
| 35         | 535   | 567  | GPAGAAPIGIPRPGPPGPPGAGEKGAPEK     | 4OH+Gal.Glc  | P546-OH, K561-OH.Gal.Glc                                              | P549-OH?, P551-OH?, P554-OH?, P555-OH?                         | P549-OH, P555-OH (Gly-X-Hyp motif)                    |
| 36         | 561   | 575  | KGAPGEKQDPAQR                     | 3OH+Gal.Glc  | K561-OH, P564-OH, K567-OH                                             | K561-OH.Gal.Glc, K567-OH.Gal.Glc                               |                                                       |
| 37         | 576   | 600  | DGLQGPVGLPAGVPVGGPPGEDGDK         | 3OH          | P585-OH, P587-OH, P594-OH                                             |                                                                |                                                       |
| 38         | 597   | 604  | DGDKGEIG                          | OH+Gal.Glc   | K600-OH.Gal.Glc                                                       |                                                                |                                                       |
| 39         | 603   | 617  | IGEPGQKSKGDKGE                    | 4OH+3Gal.Glc | P606-OH, K609-OH.Gal.Glc, K612-OH.Gal.Glc, K615-OH.Gal.Glc            |                                                                |                                                       |
| 40         | 613   | 645  | GDKGEQPPGPTGPPGQPIGPPGADGEPGPR    | 4OH+Gal.Glc  | K615-OH.Gal.Glc, P621-OH, P633-OH                                     | P642-OH?, P644-OH?                                             | P642-OH (Gly-X-Hyp motif)                             |
| 41         | 652   | 671  | GQKDEGPRGFPVGL                    | 4OH+Gal.Glc  | K654-OH.Gal.Glc, P663-OH, P665-OH, P666-OH                            |                                                                |                                                       |
| 42         | 657   | 685  | EGPRGPPGPPGVPVGLGPPGKGETG         | 5OH+Gal.Glc  | P663-OH, P666-OH, P675-OH, P678-OH, K681-OH.Gal.Glc                   |                                                                |                                                       |
| 43         | 686   | 707  | DVGQMPGPPGPPGPPGAPGA              | 3OH          | P693-OH, P696-OH, P705-OH                                             |                                                                |                                                       |
| 44         | 686   | 707  | DVGQMPGPPGPPGPPGAPGA              | 5OH          | P692-OH, P693-OH, P695-OH, P696-OH, P705-OH                           |                                                                |                                                       |
| 45         | 708   | 725  | DGPQPPGGINPGAVGE                  | 2OH          | P720-OH                                                               | P713-OH?, P714-OH?                                             | P714-OH (Gly-X-Hyp motif)                             |
| 46         | 726   | 740  | KGEPGAGEPGLPGE                    | 4OH+Gal.Glc  | K726-OH.Gal.Glc, P729-OH, P735-OH, P738-OH                            |                                                                |                                                       |
| 47         | 727   | 750  | GEPGAGEPGLGEGGPPGPKGR             | 5OH+Gal.Glc  | P729-OH, P735-OH, P738-OH, K747-OH.Gal.Glc                            | P744-OH?, P746-OH?                                             | P744-OH (Gly-X-Hyp motif)                             |
| 48         | 732   | 749  | AGEPGLGEGGPPGPKGE                 | 4OH+Gal.Glc  | P735-OH, P738-OH, P744-OH, K747-OH.Gal.Glc                            |                                                                |                                                       |
| 49         | 751   | 768  | GKGESEGPSAAGPPGPK                 | 2OH+Gal.Glc  | K753-OH.Gal.Glc, P765-OH                                              |                                                                |                                                       |
| 50         | 756   | 772  | SGPSGAAGPPGPKGPPG                 | 3OH          | P771-OH                                                               | P765-OH?, P767-OH?, K768-OH?                                   | P765-OH, K-768 (Gly-X-Hyp motif)                      |
| 51         | 773   | 787  | DDGPKGSPVGFPG                     | 3OH+Gal.Glc  | K777-OH.Gal.Glc, P780-OH, P786-OH                                     |                                                                |                                                       |
| 52         | 788   | 800  | DPGPPGEPGPAQ                      | 3OH          | P789-OH, P792-OH, P795-OH                                             |                                                                |                                                       |
| 53         | 808   | 833  | GDDGEPGQTPGPPGPPGPPGK             | 4OH          | P813-OH, P819-OH, P825-OH                                             | P831-OH?, K833-OH?                                             | P831-OH (Gly-X-Hyp motif)                             |
| 54         | 825   | 843  | PGSPGPKRPPGPPGPE                  | 3OH          | P825-OH, P831-OH, P837-OH                                             |                                                                |                                                       |
| 55         | 846   | 863  | QKEKAKGEAGLEPPGK                  | 3OH+Gal.Glc  | K849-OH.Gal.Glc, K852-OH.Gal.Glc, P861-OH                             |                                                                |                                                       |
| 56         | 864   | 882  | TGPIGQAPGKPPDGLR                  | 2OH          | P873-OH, P876-OH                                                      |                                                                |                                                       |
| 57         | 880   | 890  | GLRGIIPVGE                        | OH           | P885-OH                                                               |                                                                |                                                       |
| 58         | 882   | 914  | RGIPGPPVGEQGLGAPGDPGPPGMPGPPGLPL  | 5OH          | P894-OH, P897-OH, P912-OH                                             | P885-OH?, P887-OH?, P902-OH?, P903-OH?, P905-OH?               | P885-OH, P903-OH (Gly-X-Hyp motif)                    |
| 59         | 915   | 932  | KGDSGPKGEKHPGLGL                  | 4OH+2Gal.Glc | K915-OH, K921-OH, P927-OH                                             | K915-OH.Gal.Glc?, P920-OH?, K921-OH.Gal.Glc?, K924-OH.Gal.Glc? | K915-OH.Gal.Glc or K921-OH.Gal.Glc or K924-OH.Gal.Glc |
| 60         | 917   | 938  | DSGPKGEKHPGLGLGPPGE               | 4OH+2Gal.Glc | K921-OH.Gal.Glc, K924-OH.Gal.Glc, P927-OH, P936-OH                    |                                                                |                                                       |
| 61         | 942   | 959  | KGDRVPPGQSSGPKGE                  | 3OH+2Gal.Glc | K942-OH.Gal.Glc, P948-OH, K957-OH.Gal.Glc                             |                                                                |                                                       |
| 62         | 999   | 1013 | AGQPDPGPPGPPGVEV                  | 7OH          | P1002-OH, P1004-OH, P1005-OH, P1007-OH, P1008-OH, P1010-OH, P1011-OH  |                                                                |                                                       |

10            20            30            40            50            60  
 GPAGPMLTG **RP**GPMP**PP**GS **GGLK**GE**PG**DM GPQGP**RGVQ**G **PP**GPAG**KP**GR RGRAGSDGAR  
  
 70            80            90            100           110           120  
 G**MP**Q**TGPK**G **DR**GF**DGLAGL** **PGEK**GHR**GD**P **GPSG****PP****PP**G **ED**GER**GDD**GE **VG**PR**GLP**GE**P**  
  
 130           140           150           160           170           180  
 GPR**GL**L**GP**KG **PP**GP**PP**GV **TG**MD**GQ****PG**PK **GN**VG**PQ**GE**PG** **PP**Q**QGN**PGA **QGL****PP**Q**GA**I  
  
 190           200           210           220           230           240  
 G**PP**GE**KG**PLG **KP**GL**PG**MPGA **DG**PP**GH**PGKE **GP**PE**KG**GGQ **PP**GP**Q**GP**IGY** **PG**PR**GV**K**GAD**  
  
 250           260           270           280           290           300  
 G**IR**GL**KGT**KG **EK**GED**GF**PGF **KG**DM**GK**GD**R** **GE**IG**PP**GP**RG** **ED**G**PE**G**K**GR **GG**PN**GD**PG**PL**  
  
 310           320           330           340           350           360  
 G**PP**GE**KG**KL**G** **VP**GL**PGY**PG**R** **QG**PK**SIG**FP **GF**PG**ANG**E**K**G **GR**GT**PG**K**PG**P **RG**Q**R**GP**T**GP**R**  
  
 370           380           390           400           410           420  
 G**ER**GP**R**GITG **KP**GP**K**GN**SS**G **DG**PAG**PP**GER **GP**NG**PQ**GP**T**G **FP**GP**K**GP**PG**P **PG**KD**GL**PG**H**P  
  
 430           440           450           460           470           480  
 G**Q**RGET**GF**Q **KT**G**PP**GP**PG**V **VG**PQ**GP**TGET **GP**MGER**GH**PG **PP**GP**PP**GE**Q**GL **P**GLAG**K**EG**T**K  
  
 490           500           510           520           530           540  
 G**DP**GPAG**LP**G **KD**GP**P**LR**GF** **PG**DR**GL**PG**P**V **GAL**GL**K**G**S**EG **PP**GP**PP**GP**AG**S **PG**ERGPAGAA  
  
 550           560           570           580           590           600  
 G**PI**GI**P**GRPG **PQ**GP**PG**PAGE **KG**AP**GE**K**GP**Q **GP**AGR**D**GL**Q**G **PV**GL**PG**PAGP **VG**PP**GE**D**G**D**K**  
  
 610           620           630           640           650           660  
 G**E**IG**E**PG**Q**KG **SK**GD**K**GE**Q**GP **PG**PT**GP**Q**GP**I **GQ**PG**PS**GADG **EP**GP**R**Q**Q**GL **FG**Q**K**D**E**GP**R**  
  
 670           680           690           700           710           720  
 G**FP**GP**PP**GP**V**G **LQ**GL**PG**PP**GE** **K**GET**GD**V**G**Q**M** **GP**PP**PP**GP**RG** **PS**GAP**GA**DGP **QG**PP**GG**IG**N**P  
  
 730           740           750           760           770           780  
 GAVGE**K**GE**PG** **EAGE**PG**L**PG**E** **GG**PP**GP**K**GER** **GE**K**GES**GPSG **AAG**PP**GP**K**GP** **PG**DD**GP**K**G**SP  
  
 790           800           810           820           830           840  
 G**P**VG**F**PG**D**PG **PP**GE**PG**PAG**Q** **DG**PP**GD**K**GDD** **GE**PG**Q**T**G**SP**G** **PT**GE**PG**PS**G**P **PG**K**R**GP**PP**GA  
  
 850           860           870           880           890           900  
 G**PE**GR**Q**GE**K**G **AK**GE**AG**LE**GP** **PG**K**T**GP**IG**P**Q** **GAP**G**K**PG**PD**G **LR**GI**PG**P**V**GE **QGL****PG**AP**GP**D  
  
 910           920           930           940           950           960  
 G**PP**GP**MP**PPG **L**P**GL**K**G**DS**GP** **KGE**K**GH**PL**I** **GL**IG**PP**GE**Q**G **EK**GDR**GV**PGP **QG**SS**GP**K**GE**Q  
  
 970           980           990           1000           1010  
 G**IT**GP**SG**PIG **PP**GP**PL**PGP **PG**PK**GAK**GSS **GPT**GP**K**GE**AG** **QP**GP**PP**PP**GP** **P**GEV

**P,K**: hydroxylation

Red sequence: observed in MS

**K**: gal.glc hydroxylysine

Black sequence: not observed in MS
