# Supplementary material
Source: PubMed Central journal article supplement (PMC3504773)
Supplement: supp_M112.406850_jbc.M112.406850-3.pdf [file supp_M112.406850_jbc.M112.406850-3.pdf]

Supplemental Table S2

## Notes:

P-OH = hydroxyproline  
 m = oxidation of M  
 K-OH.Gal = galactose on hydroxylysine  
 K-OH.Gal.Glc = galactose.glucose on hydroxylysine  
 All product ions: ppm<10, S/N>=3  
 Systematic mass error is -8.9ppm for the spectra whose numbers are labeled in red.

| Spectrum # | start | end  | sequence                                | total PTMs   | localized sites                                             | unlocalized sites                                                           | pseudolocalized                                                  |
|------------|-------|------|-----------------------------------------|--------------|-------------------------------------------------------------|-----------------------------------------------------------------------------|------------------------------------------------------------------|
| 1          | 422   | 438  | DPTSSPEIGPMPANQ                         | OH           | P435-OH                                                     |                                                                             |                                                                  |
| 2          | 443   | 466  | EGIGGRGEKQKGEPAIIIEPGLM                 | 2OH+2Gal.Glc | K452-OH.Gal.Glc, K455-OH.Gal.Glc                            |                                                                             |                                                                  |
| 3          | 499   | 525  | GPPGRPLPGADGLPPPGTLMMLPFR               | 6OH          | P501-OH, P504-OH, P507-OH, P513-OH, P515-OH, P516-OH        |                                                                             |                                                                  |
| 4          | 526   | 554  | FGGGDAGSKGPMVSAQESQAQAILQQAR            | OH           | K535-OH                                                     |                                                                             |                                                                  |
| 5          | 567   | 581  | TGRPGVPVPPGSGGL                         | 3OH          | P570-OH, P575-OH, P576-OH                                   |                                                                             |                                                                  |
| 6          | 555   | 594  | LALRGPAGMGLTGRPGVPVPPGSGGLKGEVDVGPQGGPR | 4OH+Gal.Glc  | P576-OH, K582-OH.Gal.Glc, P585-OH                           | P570-OH?, P572-OH?                                                          | P570-OH (Gly-X-Hyp motif)                                        |
| 7          | 595   | 608  | GVQGGPGAGKPKGR                          | 3OH          | P599-OH, P600-OH, P606-OH                                   |                                                                             |                                                                  |
| 8          | 619   | 630  | GMPGQTGPKGDR                            | 2OH+Gal.Glc  | P621-OH, K627-OH.Gal.Glc                                    |                                                                             |                                                                  |
| 9          | 631   | 645  | GFDGLAAGLPGEKGHR                        | 2OH+Gal.Glc  | P639-OH, K642-OH.Gal.Glc                                    |                                                                             |                                                                  |
| 10         | 633   | 658  | DGLAGLPGEKGRDPPGSGPPGPPG                | 5OH+Gal      | P639-OH, K642-OH.Gal, P657-OH                               | P648-OH?, P650-OH?, P654-OH?, P656-OH?                                      | P648-OH, P654-OH (Gly-X-Hyp motif)                               |
| 11         | 646   | 672  | GDPGSPGPPGDDGDEGDDGVEGPR                | 4OH          | P648-OH, P653-OH, P654-OH, P656-OH, P657-OH                 |                                                                             |                                                                  |
| 12         | 673   | 681  | GLPGEFGR                                | 2OH          | P675-OH, P678-OH                                            |                                                                             |                                                                  |
| 13         | 688   | 708  | GPPGPPGPPVTGMDQGGPKG                    | 5OH          | P690-OH, P693-OH, P696-OH, P705-OH                          |                                                                             | K708-OH (Hyl)                                                    |
| 14         | 702   | 716  | DGQGPKGKNGVQGE                          | 2OH+Gal.Glc  | K708-OH.Gal.Glc                                             |                                                                             | P705-OH (Gly-X-Hyp motif)                                        |
| 15         | 709   | 744  | GNVGPQGEPPGQQGNPQAQGLPGQGAIGPPGK        | 6OH          | P717-OH, P726-OH, P732-OH, P741-OH, K744-OH                 |                                                                             | P720-OH (Gly-X-Hyp motif)                                        |
| 16         | 745   | 767  | GLLKGPLGMPGADGPPGHPGK                   | 5OH          | P750-OH, P753-OH, P756-OH, P762-OH, P765-OH                 |                                                                             |                                                                  |
| 17         | 768   | 792  | EGPPGKGGGPPGPGVGPYGPGR                  | 4OH+Gal.Glc  | K774-OH.Gal.Glc, P780-OH, P789-OH                           |                                                                             | P771-OH (Gly-X-Hyp motif)                                        |
| 18         | 793   | 801  | GVKAGDIR                                | OH+Gal.Glc   | K795-OH.Gal.Glc                                             |                                                                             |                                                                  |
| 19         | 808   | 828  | KEKEDGFPFKDMDIKGDR                      | 4OH+3Gal.Glc | K810-OH.Gal.Glc, P816-OH, K819-OH.Gal.Glc, K825-OH.Gal.Glc  |                                                                             |                                                                  |
| 20         | 829   | 848  | GEIGPPRGEDEGPEPKGR                      | 3OH+Gal.Glc  | P833-OH, P834-OH, K846-OH.Gal.Glc                           |                                                                             |                                                                  |
| 21         | 849   | 866  | GPGNGDPLPGPEKGGK                        | 3OH+Gal.Glc  | P855-OH                                                     | P861-OH?, K864-OH.Gal.Glc?, K866-OH.Gal.Glc                                 | P861-OH, K864-OH.Gal.Glc (Gly-X-Hyp and Gly-X-Hyl.Gal.Glc motif) |
| 22         | 867   | 878  | LVPLGLPYGPR                             | 3OH          | P870-OH, P873-OH, P876-OH                                   |                                                                             |                                                                  |
| 23         | 879   | 900  | QPKGSGIFGPPGANGKEKGR                    | 4OH+2Gal.Glc | K882-OH.Gal.Glc, P888-OH, P891-OH, K897-OH.Gal.Glc          |                                                                             |                                                                  |
| 24         | 901   | 909  | GTPGKPPGR                               | 2OH          | P903-OH                                                     |                                                                             |                                                                  |
| 25         | 925   | 948  | GITGKPKGKNSGGDGPAGPPGER                 | 3OH          | P930-OH, P944-OH, P945-OH                                   |                                                                             | P906-OH (Gly-X-Hyp motif)                                        |
| 26         | 925   | 948  | GITGKPKGKNSGGDGPAGPPGER                 | 2OH+Gal.Glc  | K933-OH.Gal.Glc, P945-OH                                    |                                                                             |                                                                  |
| 27         | 949   | 963  | GNPQGGTGFPGPK                           | 2OH          | P960-OH                                                     |                                                                             | K963-OH (Hyl)                                                    |
| 28         | 964   | 981  | GPPGPPKDGPLGHPGQR                       | 4OH          | P966-OH, P969-OH, P975-OH, P978-OH                          |                                                                             |                                                                  |
| 29         | 990   | 1014 | TGPPGPPGVVGPQGTGETGPMGER                | 4OH          | P992-OH, P993-OH, P995-OH, P996-OH                          |                                                                             |                                                                  |
| 30         | 1015  | 1034 | GHPGPPGPEQGLPLGAGK                      | 5OH          | P1017-OH, P1019-OH, P1020-OH, P1023-OH, P1029-OH            |                                                                             |                                                                  |
| 31         | 1035  | 1049 | EGTKGDPPAGLPGK                          | 3OH          | K1038-OH, P1041-OH, P1047-OH                                |                                                                             |                                                                  |
| 32         | 1035  | 1049 | EGTKGDPPAGLPGK                          | 2OH+Gal.Glc  | K1038-OH.Gal.Glc, P1047-OH                                  |                                                                             |                                                                  |
| 33         | 1050  | 1060 | DGPPGLRFPFG                             | 2OH          | P1053-OH, P1059-OH                                          |                                                                             |                                                                  |
| 34         | 1063  | 1074 | GLPGVGLGALGLK                           | OH           | P1065-OH                                                    |                                                                             |                                                                  |
| 35         | 1063  | 1092 | GLPGVGLGALGLKNEGPPGPPGAGSPGER           | 4OH+Gal.Glc  | K1074-OH.Gal.Glc, P1083-OH, P1089-OH                        |                                                                             | P1065-OH (Gly-X-Hyp motif)                                       |
| 36         | 1075  | 1092 | GNEGPPGPPGAGSPGER                       | 3OH          | P1080-OH, P1083-OH, P1089-OH                                |                                                                             |                                                                  |
| 37         | 1092  | 1118 | RGPAGAAGPIGIPGRPGQPPGAGE                | 3OH          | P1104-OH, P1107-OH, P1113-OH                                |                                                                             |                                                                  |
| 38         | 1093  | 1125 | GPAGAAGPIGIPGRPGQPPGAGEKAPGEK           | 2OH+Gal.Glc  | K1119-OH.Gal.Glc                                            | P1104-OH?, P1107-OH?, P1109-OH?, P1112-OH?, P1113-OH?, P1115-OH?            | P1104-OH or P1107-OH or P1113-OH (Gly-X-Hyp motif)               |
| 39         | 1134  | 1160 | DGLQGVVGLPGPAGVPPGEGDGDKE               | 3OH          | P1143-OH, P1152-OH, K1158-OH                                |                                                                             |                                                                  |
| 40         | 1134  | 1167 | DGLQGVVGLPGPAGVPPGEGDGDKEIGEIPGQK       | 4OH          | P1143-OH, P1164-OH, K1167-OH                                |                                                                             | P1151-OH?, P1152-OH?                                             |
| 41         | 1171  | 1203 | GDKGEGPPGPTGPPGIGQPPGSGADGEPGPR         | 4OH+Gal.Glc  | K1173-OH.Gal.Glc, P1179-OH, P1191-OH                        |                                                                             | P1200-OH (Gly-X-Hyp motif)                                       |
| 42         | 1204  | 1218 | GQQQLFGQKGDGPR                          | OH+Gal.Glc   | K1212-OH.Gal.Glc                                            |                                                                             |                                                                  |
| 43         | 1219  | 1239 | GFPGPPVGLQGLGPPGPK                      | 5OH          | P1221-OH, P1224-OH, P1233-OH, P1236-OH, K1239-OH            |                                                                             |                                                                  |
| 44         | 1244  | 1265 | DVGQMGPPGPPGPRGSPGAPGA                  | 3OH          | P1251-OH, P1254-OH, P1263-OH                                |                                                                             |                                                                  |
| 45         | 1258  | 1284 | GPSGAPGADGPPGPPGIGNPGAVGEK              | OH           | P1278-OH                                                    |                                                                             |                                                                  |
| 46         | 1285  | 1308 | GEPGEAGEPLGPEGPPGPKGER                  | 4OH+Gal.Glc  | P1287-OH, P1293-OH, P1302-OH, K1305-OH.Gal.Glc              |                                                                             |                                                                  |
| 47         | 1309  | 1326 | KEKESGSPGAAAGPPGPK                      | 2OH+Gal.Glc  | K1311-OH.Gal.Glc, P1323-OH                                  |                                                                             |                                                                  |
| 48         | 1331  | 1358 | DDGPKGSPGVGPPGDPGPEGPAAGQ               | 5OH          | P1338-OH, P1344-OH, P1347-OH, P1353-OH                      |                                                                             | P1349-OH?, P1350-OH?                                             |
| 49         | 1346  | 1358 | DPGPPGEPGPAAGQ                          | 3OH          | P1350-OH, P1353-OH                                          |                                                                             | P1347-OH?, P1349-OH?                                             |
| 50         | 1366  | 1391 | GDDGEGPQTGSPGTPGEPGSPGPK                | 2OH          | P1377-OH, P1383-OH, P1389-OH (two isoforms eluted together) |                                                                             |                                                                  |
| 51         | 1393  | 1403 | GPPGPAPEGR                              | OH           | P1395-OH                                                    |                                                                             |                                                                  |
| 52         | 1404  | 1421 | QKEKAGKEAGLEGGPKG                       | 2OH+2Gal.Glc | K1407-OH.Gal.Glc, K1410-OH.Gal.Glc                          |                                                                             |                                                                  |
| 53         | 1411  | 1421 | GEAGLEGGPKG                             | OH           | P1419-OH                                                    |                                                                             |                                                                  |
| 54         | 1422  | 1440 | TGPIGQAGAPGKPGDGLR                      | 2OH          | P1431-OH, P1434-OH                                          |                                                                             |                                                                  |
| 55         | 1441  | 1473 | GIPGVPGEQGLPSPGDPGPPGMPGPPGLPGLK        | 4OH          | P1452-OH, P1470-OH, K1473-OH                                |                                                                             | P1443-OH?, P1445-OH?                                             |
| 56         | 1482  | 1499 | KGHPGLIGLIPGPEQGE                       | 3OH          | K1482-OH, P1485-OH, P1494-OH                                |                                                                             |                                                                  |
| 57         | 1483  | 1503 | GHPGLIGLIPGPEQGEKDR                     | 3OH+Gal.Glc  | P1485-OH, P1494-OH, K1500-OH.Gal.Glc                        |                                                                             |                                                                  |
| 58         | 1504  | 1515 | GLPGQSSGPK                              | 2OH          | P1506-OH                                                    |                                                                             | K1515-OH (Hyl)                                                   |
| 59         | 1546  | 1582 | GSSGPTGKGEAGHPGPPGPPGPEVIQPLPIQASR      | 4OH+Gal      | K1554-OH.Gal                                                | P1550-OH?, P1553-OH?, P1560-OH?, P1562-OH?, P1563-OH?, P1565-OH?, P1566-OH? | P1560-OH, P1562-OH, P1566-OH (Gly-X-Hyp motif)                   |
| 60         | 1557  | 1571 | AGHPGPPGPPGPE                           | 4OH          | P1560-OH, P1563-OH, P1566-OH, P1569-OH                      |                                                                             |                                                                  |

|             |            |             |            |            |            |
|-------------|------------|-------------|------------|------------|------------|
| 10          | 20         | 30          | 40         | 50         | 60         |
| MDVHTRWKAR  | SALRPGAPLL | PLLLLLLLLWA | PPPSRAAQPA | DLLKVLDFHN | LPDGITKTTG |
| 70          | 80         | 90          | 100        | 110        | 120        |
| FCATTRSSKG  | PDVAYRVTKD | AQLSAPTKQL  | YPASAFPEDF | SILTTVKAKK | GSQAFLVSIY |
| 130         | 140        | 150         | 160        | 170        | 180        |
| NEQGIQQIGL  | ELGRSPVFLY | EDHTGKPGPE  | DYPLFRGINL | SDGKWHRIAL | SVHKKNVTLI |
| 190         | 200        | 210         | 220        | 230        | 240        |
| LDCKKKTTKF  | LDRSDHPMID | INGIIVFGTR  | ILDEEVFEGD | IQQLLFVSDH | RAAYDYCEHY |
| 250         | 260        | 270         | 280        | 290        | 300        |
| SPDCDTAVPD  | TPQSQDPNPD | EYYTEGDGEG  | ETYYYYEYPY | EDPEDLGKEP | TPSKKPVEAA |
| 310         | 320        | 330         | 340        | 350        | 360        |
| KETTEVPEEL  | TPTPTEAAPM | PETSEGAGKE  | EDVGIGDYDY | VPSEDYITPS | PYDDLTYGEG |
| 370         | 380        | 390         | 400        | 410        | 420        |
| EENPDQPTDP  | GAGAEIPTST | ADTSNSSNPA  | PPPGEGADDL | EGEFTEETIR | NLDENYYDPY |
| 430         | 440        | 450         | 460        | 470        | 480        |
| YDPTSSPSEI  | GPGMPANQDT | IYEGIGGPRG  | EKGQKGEPAI | IEPGMLIEGP | PGPEGPAGLP |
| 490         | 500        | 510         | 520        | 530        | 540        |
| GPPGTMGPTG  | QVGDPGERGP | PGRPGLPGAD  | GLPGPPGTML | MLPFRFGGGG | DAGSKGPMVS |
| 550         | 560        | 570         | 580        | 590        | 600        |
| AQESQAQAIL  | QQARLALRGP | AGPMGLTGRP  | GPVGPFGSGG | LKGEFGDVGP | QGPRGVQGGP |
| 610         | 620        | 630         | 640        | 650        | 660        |
| GPAGKPPRRG  | RAGSDGARGM | PGQTGPKGDR  | GFDGLAGLPG | EKGHRGDPGP | SGPPGPPGDD |
| 670         | 680        | 690         | 700        | 710        | 720        |
| GERGDDGEVG  | PRGLPGEPPG | RGLLGPKGPP  | GPPGPPGVTG | MDGQPPGKGN | VGPQGEPPGP |
| 730         | 740        | 750         | 760        | 770        | 780        |
| GQQGNPGAQG  | LPGPQGAIGP | PGEKGPLGKP  | GLPGMPGADG | PPGHGKKEGP | PGEKGGQGGP |
| 790         | 800        | 810         | 820        | 830        | 840        |
| GPQGPPIGYPG | PRGVKGADGI | RGLKGTKEGK  | GEDGFPGFKG | DMGIKDRGE  | IGPPGPRGED |
| 850         | 860        | 870         | 880        | 890        | 900        |
| GPEGPKGRGG  | PNGDPGPLGP | PGEKGLGVP   | GLPGYPGRQG | PKGSIGFPGF | PGANGEKGR  |
| 910         | 920        | 930         | 940        | 950        | 960        |
| GTGKPGPRG   | QRGPTGRGE  | RGPRGITGKP  | GPKGNSGGDG | PAGPPGERGP | NGPQGPTGFP |
| 970         | 980        | 990         | 1000       | 1010       | 1020       |
| GPKGPPGPPG  | KDGLPGHPGQ | RGETGFQGKT  | GPPGPPGVVG | PQGPTGETGP | MGERGHPGPP |
| 1030        | 1040       | 1050        | 1060       | 1070       | 1080       |
| GPPGEQGLPG  | LAGKEGKGD  | PGPAGLPGKD  | GPPGLRGFPG | DRGLPGPVGA | LGLKGNEGPP |
| 1090        | 1100       | 1110        | 1120       | 1130       | 1140       |
| GPPGPAGSPG  | ERGPAGAAGP | IGIPGRPPGQ  | GPPGPAGEKG | APGEKGPQGP | AGRDGLQGPV |

1150 1160 1170 1180 1190 1200  
 GL**P**GPAGPVG **P**PGEDG**D**K**G**E IG**E****P**G**Q**K**G**SK **G**D**K**G**E**Q**G****P****P**G **P**T**G****P**Q**G****P**I**G**Q **P**GP**S**GAD**G**E**P**  
 1210 1220 1230 1240 1250 1260  
 G**P**R**G**Q**Q**GL**F**G **Q****K****G**D**E**G**P**R**G****F** **P****G****P****P**G**P**V**G**L**Q** **G**L**P****G****P****P****G****E****K****G** **E**T**G**D**V**G**Q**M**G****P** **P****G****P****P**G**P**R**G****P****S**  
 1270 1280 1290 1300 1310 1320  
 G**A****P**GAD**G****P**Q**G** **P****P**G**G**I**G**N**P**G**A** **V**G**E**K**G**E**P**G**E**A **G**E**P****G**L**P**G**E**G**G** **P****P**G**P****K**G**E**R**G**E **K**G**E**S**G****P****S**G**A**A  
 1330 1340 1350 1360 1370 1380  
 G**P****P****G****P****K****G****P****P**G **D**D**G****P****K****S****P****G**P **V**G**F****P****G**D**P****G****P**P **G**E**P****G****P**A**G**Q**D**G **P****P**G**D****K****G**D**D**G**E** **P**G**Q**T**G****S****P****G****P**T  
 1390 1400 1410 1420 1430 1440  
 G**E****P****G****P****S****G****P****P**G **K**R**G****P****P**G**P**A**G**P **E**G**R**Q**G**E**K****G**A**K** **G**E**A**G**L**E**G****P****P**G **K**T**G****P**I**G****P**Q**G**A **P****G****K****P****G****P**D**G**L**R**  
 1450 1460 1470 1480 1490 1500  
 G**I****P****G****P**V**G**E**Q**G **L****P****G****S****P****G**D**G**P **P**G**P**M**G****P****P****G**L**P** **G**L**K****G**D**S****G****P****K**G **E****K****G****H****P****G**L**I****G**L **I****G****P****P****G**E**Q****G****E****K**  
 1510 1520 1530 1540 1550 1560  
 G**D**R**G**L**P****G****P**Q**G** **S****S****G****P****K****G**E**Q****G**I **T****G****P****S****G****P**I**G****P**P **G****P****P****G**L**P****G****P****P**G **P****K****G**A**K****G****S****S****G**P **T****G****P****K****G**E**A****G****H****P**  
 1570 1580 1590 1600 1610 1620  
 G**P****P****G****P****P****G****P****G** **E****V**I**Q****L****P**I**Q**A **S**R**T**R**R**N**I**D**A**S **Q**L**L**D**D****G****N****G**E**N** **Y****V**D**Y**A**D****G****M**E**E** **I****F****G****S**L**N****S**L**K**L  
 1630 1640 1650 1660 1670 1680  
 E**I**E**Q****M****K****R****P**L**G** **T****Q****Q****N****P**A**R**T**C**K **D**L**Q**L**C**H**P**D**F**P **D**G**E****Y****W****V**D**P****N**Q **G****C****S****R****D****S****F****K****V**Y **C****N****F**T**A****G****G****S****T**C  
 1690 1700 1710 1720 1730 1740  
 V**F****P****D****K****K****S**E**G**A **R**I**T****S****W****P****K**E**N**P **G****S****W****F****S**E**F****K****R**G **K**L**L****S****Y****V**D**A**E**G** **N****P****V****G****V****V****Q****M**T**F** **L**R**L**L**S**A**S**A**H**Q  
 1750 1760 1770 1780 1790 1800  
 N**V****T****Y****H****C****Y****Q****S****V** **A****W****Q****D****A****A****T****G****S****Y** **D****K****A**L**R****F**L**G****S****N** **D**E**E****M****S****Y****D****N****N**P **Y**I**R**A**L****V**D**G****C**A **T****K****K****G****Y****Q****K****T****V**L  
 1810 1820 1830  
 E**I**D**T****P****K****V**E**Q****V** **P**I**V**D**I****M****F****N**D**F** **G**E**A****S****Q****K****F****G****F**E **V****G****P****A****C****F****M****G**

**K P**: hydroxylation

**K**: gal.glc hydroxylysine

**K**: gal

**K**: Gal.Glc or Gal hydroxylysine

**Red sequence**: observed in MS

**Black sequence**: not observed in MS
